# Supplementary material for: A high-throughput cytotoxicity screening platform reveals agr-independent mutations in bacteraemia-associated Staphylococcus aureus that promote intracellular persistence
Source: eLife. 2023 Jun 8;12:e84778. doi: 10.7554/eLife.84778 (PMC10259494; doi:10.7554/eLife.84778)
Supplement: Supplementary file 1. — Z′ factor: These are the Z′ factors calculated from the parameters data. Legend: Variable details. [file elife-84778-supp1.xlsx]

## Sheet: Sheet1
sample_id	plate	experiment_id	well_id	AUC_death	max_death	max_rate_death	min_death	time_of_max_death	time_of_min_death
JE2	GP-C1	exp220303_GP-C1	exp220303_GP-C1_B08	124.535	0.7991	0.00263998	-0.0172326	605	80
JE2	GP-C1	exp220303_GP-C1	exp220303_GP-C1_C04	154.746	1.00321	0.00344581	0.012193	575	90
JE2	GP-C1	exp220303_GP-C1	exp220303_GP-C1_D05	173.59	1.1481	0.00402432	-0.0178027	555	70
JE2	GP-C1	exp220303_GP-C1	exp220303_GP-C1_D10	143.219	0.987209	0.0038167	-0.073262	600	135
JE2	GP-C1	exp220303_GP-C1	exp220303_GP-C1_F04	172.794	1.07368	0.00330581	0.0874197	575	80
JE2	GP-C1	exp220308_GP-C1	exp220308_GP-C1_C04	158.267	0.9857	0.00315676	0.0360422	605	110
JE2	GP-C1	exp220308_GP-C1	exp220308_GP-C1_D05	183.197	1.19046	0.00405007	-0.0927207	555	0
JE2	GP-C1	exp220308_GP-C1	exp220308_GP-C1_D10	163.443	0.895529	0.00284568	-0.0259547	550	0
JE2	GP-C1	exp220308_GP-C1	exp220308_GP-C1_F04	153.199	0.948036	0.00286561	0.0397971	615	80
JE2	GP-C1	exp220309_GP-C1	exp220309_GP-C1_B08	170.293	0.977426	0.00298758	0.00186539	605	0
JE2	GP-C1	exp220309_GP-C1	exp220309_GP-C1_D10	176.182	1.0232	0.00329272	-0.00728954	625	80
JE2	GP-C1	exp220316_GP-C1	exp220316_GP-C1_B08	138.327	0.823147	0.00233658	0.0258811	615	55
JE2	GP-C1	exp220316_GP-C1	exp220316_GP-C1_C04	171.199	1.04604	0.00327103	0.00442377	590	70
JE2	GP-C1	exp220316_GP-C1	exp220316_GP-C1_D05	151.382	0.941426	0.00285486	0.0554392	590	85
JE2	GP-C1	exp220316_GP-C1	exp220316_GP-C1_D10	180.814	1.10231	0.00347098	-0.0546129	595	0
JE2	GP-C1	exp220316_GP-C1	exp220316_GP-C1_F04	176.199	1.08941	0.00342052	-0.0417233	595	40
JE2	GP-C1	exp220328_GP-C1	exp220328_GP-C1_B08	159.928	0.981485	0.00311709	-0.0125768	540	0
JE2	GP-C1	exp220328_GP-C1	exp220328_GP-C1_C04	164.831	1.0447	0.00341715	0.00293326	515	0
JE2	GP-C1	exp220328_GP-C1	exp220328_GP-C1_D05	166.099	1.05071	0.00338139	-0.00832951	520	0
JE2	GP-C1	exp220328_GP-C1	exp220328_GP-C1_D10	167.288	0.919187	0.00252491	0.00714455	500	0
JE2	GP-C1	exp220328_GP-C1	exp220328_GP-C1_F04	159.19	1.01155	0.00333007	0.0108285	540	0
BPH3370	GP-C1	exp220303_GP-C1	exp220303_GP-C1_D03	107.156	0.660564	0.000858903	0.166903	1360	0
BPH3370	GP-C1	exp220303_GP-C1	exp220303_GP-C1_E09	79.7297	0.526649	0.000637693	0.0624142	1360	110
BPH3370	GP-C1	exp220303_GP-C1	exp220303_GP-C1_F05	77.6297	0.670079	0.00109754	0.00194678	1360	100
BPH3370	GP-C1	exp220303_GP-C1	exp220303_GP-C1_F10	69.8507	0.533073	0.000872878	0.0346904	1360	190
BPH3370	GP-C1	exp220308_GP-C1	exp220308_GP-C1_D03	129.52	0.901611	0.00114559	0.0350251	1225	185
BPH3370	GP-C1	exp220308_GP-C1	exp220308_GP-C1_E09	54.4143	0.379309	0.000568786	0.00198596	1195	230
BPH3370	GP-C1	exp220308_GP-C1	exp220308_GP-C1_F05	69.8476	0.711842	0.00100192	-0.129381	1360	150
BPH3370	GP-C1	exp220308_GP-C1	exp220308_GP-C1_F10	82.9531	0.765459	0.00102852	-0.110178	1360	100
BPH3370	GP-C1	exp220309_GP-C1	exp220309_GP-C1_D03	128.136	0.842254	0.00128161	0.0430125	1170	200
BPH3370	GP-C1	exp220309_GP-C1	exp220309_GP-C1_E09	56.3802	0.396779	0.000635929	-0.0111461	1305	165
BPH3370	GP-C1	exp220309_GP-C1	exp220309_GP-C1_F10	116.761	0.778293	0.00112733	0.031489	1360	130
BPH3370	GP-C1	exp220316_GP-C1	exp220316_GP-C1_D03	113.891	0.942758	0.00129135	-0.0309541	1360	205
BPH3370	GP-C1	exp220316_GP-C1	exp220316_GP-C1_E09	63.6535	0.490839	0.000779496	-0.0323655	1360	200
BPH3370	GP-C1	exp220316_GP-C1	exp220316_GP-C1_E11	115.594	0.899808	0.00111242	0.0411175	1360	210
BPH3370	GP-C1	exp220316_GP-C1	exp220316_GP-C1_F05	90.1303	0.724492	0.000977275	0.0123875	1360	185
BPH3370	GP-C1	exp220316_GP-C1	exp220316_GP-C1_F10	83.594	0.661491	0.000886223	-0.0114393	1360	200
BPH3370	GP-C1	exp220328_GP-C1	exp220328_GP-C1_D03	79.6951	0.610502	0.000732737	0.00528739	1360	135
BPH3370	GP-C1	exp220328_GP-C1	exp220328_GP-C1_E09	67.3255	0.571721	0.000655077	0.0356657	1360	160
BPH3370	GP-C1	exp220328_GP-C1	exp220328_GP-C1_E11	123.592	0.614024	0.00105714	0.0405321	1225	0
BPH3370	GP-C1	exp220328_GP-C1	exp220328_GP-C1_F05	81.131	0.568792	0.000595516	0.0824841	1360	210
BPH3370	GP-C1	exp220328_GP-C1	exp220328_GP-C1_F10	131.055	0.676327	0.00118349	0.0627977	790	0
TOX-4	GP-C1	exp220303_GP-C1	exp220303_GP-C1_C03	35.4716	0.200693	0.000207704	0.0664007	1360	355
TOX-4	GP-C1	exp220303_GP-C1	exp220303_GP-C1_C09	10.5766	0.115514	0.000218717	-0.0339837	1360	225
TOX-4	GP-C1	exp220303_GP-C1	exp220303_GP-C1_D06	22.4449	0.15905	0.000234934	0.010145	1285	210
TOX-4	GP-C1	exp220303_GP-C1	exp220303_GP-C1_G06	18.7238	0.134808	0.000142583	0.010065	1360	120
TOX-4	GP-C1	exp220303_GP-C1	exp220303_GP-C1_G07	16.0437	0.106493	0.000130976	0.0243425	1275	190
TOX-4	GP-C1	exp220308_GP-C1	exp220308_GP-C1_C03	10.7824	0.0938422	2.02672e-05	0.0263302	0	1360
TOX-4	GP-C1	exp220308_GP-C1	exp220308_GP-C1_C09	-18.1222	-0.0342435	0.000175758	-0.103659	0	330
TOX-4	GP-C1	exp220308_GP-C1	exp220308_GP-C1_D06	-15.3278	0.012737	5.21587e-05	-0.0669089	0	685
TOX-4	GP-C1	exp220308_GP-C1	exp220308_GP-C1_G06	-6.24173	0.0242585	0.000153896	-0.0704955	1360	250
TOX-4	GP-C1	exp220308_GP-C1	exp220308_GP-C1_G07	-9.76979	0.0235916	0.000121717	-0.0663968	0	305
TOX-4	GP-C1	exp220309_GP-C1	exp220309_GP-C1_C03	8.46524	0.0557755	0.000155649	-0.00790803	845	255
TOX-4	GP-C1	exp220309_GP-C1	exp220309_GP-C1_C09	9.82343	0.0793889	0.000238799	-0.0222911	835	180
TOX-4	GP-C1	exp220309_GP-C1	exp220309_GP-C1_D06	3.3686	0.0565363	0.00011476	-0.0259803	1360	220
TOX-4	GP-C1	exp220309_GP-C1	exp220309_GP-C1_G06	8.11293	0.0892645	0.00012441	-0.0101219	1360	205
TOX-4	GP-C1	exp220309_GP-C1	exp220309_GP-C1_G07	10.3597	0.0886194	0.000105395	0.00113454	1360	190
TOX-4	GP-C1	exp220316_GP-C1	exp220316_GP-C1_C03	2.51486	0.0439283	8.05068e-05	-0.0130978	0	255
TOX-4	GP-C1	exp220316_GP-C1	exp220316_GP-C1_C09	-8.64286	0.0084546	6.50522e-05	-0.0525724	0	300
TOX-4	GP-C1	exp220316_GP-C1	exp220316_GP-C1_D06	2.98597	0.0339559	0.000122964	-0.0227536	0	260
TOX-4	GP-C1	exp220316_GP-C1	exp220316_GP-C1_G06	18.6562	0.0888003	0.000122255	0.0358395	1090	245
TOX-4	GP-C1	exp220316_GP-C1	exp220316_GP-C1_G07	4.16864	0.0358102	9.91705e-05	-0.0145543	0	400
TOX-4	GP-C1	exp220328_GP-C1	exp220328_GP-C1_C03	17.4915	0.0806312	5.76806e-05	0.0472552	1360	195
TOX-4	GP-C1	exp220328_GP-C1	exp220328_GP-C1_C09	10.7486	0.0632203	6.00057e-05	0.0205388	1360	145
TOX-4	GP-C1	exp220328_GP-C1	exp220328_GP-C1_D06	25.7603	0.112506	1.46546e-05	0.0909474	0	615
TOX-4	GP-C1	exp220328_GP-C1	exp220328_GP-C1_G06	27.9312	0.116824	2.98481e-05	0.0980771	0	925
TOX-4	GP-C1	exp220328_GP-C1	exp220328_GP-C1_G07	12.9875	0.0639881	3.92888e-05	0.0370247	0	245
Non infected	GP-C1	exp220303_GP-C1	exp220303_GP-C1_B02	15.999	0.108513	0.000150239	0.0215784	1360	570
Non infected	GP-C1	exp220303_GP-C1	exp220303_GP-C1_D02	20.9543	0.145935	0.00020827	0.0285763	1320	450
Non infected	GP-C1	exp220303_GP-C1	exp220303_GP-C1_G04	2.53506	0.0637545	0.000158861	-0.0213945	1360	520
Non infected	GP-C1	exp220308_GP-C1	exp220308_GP-C1_B02	-32.3774	-0.0577888	0.000242152	-0.177861	1360	385
Non infected	GP-C1	exp220308_GP-C1	exp220308_GP-C1_D02	-14.2423	-0.0124629	0.000145536	-0.0924185	1360	330
Non infected	GP-C1	exp220308_GP-C1	exp220308_GP-C1_G04	12.3551	0.0889208	0.000159582	0.00770638	0	565
Non infected	GP-C1	exp220309_GP-C1	exp220309_GP-C1_B02	28.8151	0.13714	0.000164179	0.0684564	1300	0
Non infected	GP-C1	exp220309_GP-C1	exp220309_GP-C1_D02	12.4562	0.090092	0.00012778	0.0127904	1360	405
Non infected	GP-C1	exp220309_GP-C1	exp220309_GP-C1_G04	-4.54173	0.0365216	0.000109969	-0.05484	1360	205
Non infected	GP-C1	exp220316_GP-C1	exp220316_GP-C1_B02	22.0679	0.135254	4.57717e-05	0.0645129	0	480
Non infected	GP-C1	exp220316_GP-C1	exp220316_GP-C1_D02	21.6134	0.155172	0.000116137	0.0537661	0	395
Non infected	GP-C1	exp220316_GP-C1	exp220316_GP-C1_G04	-27.6977	-0.0618725	0.000135691	-0.139217	1360	305
Non infected	GP-C1	exp220328_GP-C1	exp220328_GP-C1_B02	15.1376	0.102875	0.000146864	0.012122	1360	110
Non infected	GP-C1	exp220328_GP-C1	exp220328_GP-C1_D02	6.99904	0.0587562	0.000136619	-0.0104441	1360	205
Non infected	GP-C1	exp220328_GP-C1	exp220328_GP-C1_G04	-0.798544	0.0360228	9.89477e-05	-0.0389199	1295	180
Complete lysis	GP-C1	exp220303_GP-C1	exp220303_GP-C1_G09	474.509	2.21816	0.0045013	1.45445	165	0
Complete lysis	GP-C1	exp220303_GP-C1	exp220303_GP-C1_G10	423.057	2.00252	0.00315478	1.40257	145	880
Complete lysis	GP-C1	exp220308_GP-C1	exp220308_GP-C1_G09	553.491	2.57174	0.00514214	1.69241	160	0
Complete lysis	GP-C1	exp220308_GP-C1	exp220308_GP-C1_G10	531.752	2.5238	0.00506531	1.6564	160	0
Complete lysis	GP-C1	exp220309_GP-C1	exp220309_GP-C1_G09	608.244	2.67143	0.00677404	1.51874	175	0
Complete lysis	GP-C1	exp220309_GP-C1	exp220309_GP-C1_G10	595.096	2.59932	0.00644637	1.50227	175	0
Complete lysis	GP-C1	exp220316_GP-C1	exp220316_GP-C1_G09	514.195	2.40882	0.00429702	1.64423	150	1360
Complete lysis	GP-C1	exp220316_GP-C1	exp220316_GP-C1_G10	497.87	2.33234	0.00387102	1.57521	145	1360
Complete lysis	GP-C1	exp220316_GP-C1	exp220316_GP-C1_G11	451.416	2.14536	0.00306349	1.41113	140	1360
Complete lysis	GP-C1	exp220328_GP-C1	exp220328_GP-C1_G09	483.48	2.15254	0.00461111	1.36096	160	0
Complete lysis	GP-C1	exp220328_GP-C1	exp220328_GP-C1_G10	478.41	2.14459	0.00447054	1.37698	160	0
Complete lysis	GP-C1	exp220328_GP-C1	exp220328_GP-C1_G11	449.938	2.02861	0.00433415	1.28844	165	0
NE117	GP-C1	exp220303_GP-C1	exp220303_GP-C1_E07	117.391	0.621176	0.00122056	0.09422	810	0
NE117	GP-C1	exp220303_GP-C1	exp220303_GP-C1_G02	82.2633	0.45428	0.00109565	-3.14987e-06	845	65
NE117	GP-C1	exp220308_GP-C1	exp220308_GP-C1_E07	72.4378	0.580285	0.0019002	-0.127503	790	160
NE117	GP-C1	exp220308_GP-C1	exp220308_GP-C1_G02	39.0554	0.288974	0.000872924	-0.068342	865	220
NE117	GP-C1	exp220309_GP-C1	exp220309_GP-C1_C11	134.523	0.760951	0.00201412	-0.0361301	715	0
NE117	GP-C1	exp220309_GP-C1	exp220309_GP-C1_E07	158.466	0.988785	0.00306515	-0.0354631	680	110
NE117	GP-C1	exp220309_GP-C1	exp220309_GP-C1_G02	120.04	0.636595	0.00118644	0.167533	845	210
NE117	GP-C1	exp220316_GP-C1	exp220316_GP-C1_C11	102.442	0.545538	0.000977424	0.16501	785	110
NE117	GP-C1	exp220316_GP-C1	exp220316_GP-C1_E07	41.4828	0.308568	0.000874236	-0.0382191	810	185
NE117	GP-C1	exp220316_GP-C1	exp220316_GP-C1_G02	113.782	0.582394	0.00102446	0.203408	750	135
NE117	GP-C1	exp220328_GP-C1	exp220328_GP-C1_C11	93.2391	0.540989	0.00123502	0.0328135	770	60
NE117	GP-C1	exp220328_GP-C1	exp220328_GP-C1_E07	99.4979	0.574624	0.00141847	0.0869462	690	90
NE117	GP-C1	exp220328_GP-C1	exp220328_GP-C1_G02	96.1507	0.535749	0.00111042	0.0334489	770	0
NE119	GP-C1	exp220303_GP-C1	exp220303_GP-C1_E02	33.4759	0.202267	0.000451391	0.0490825	450	1360
NE119	GP-C1	exp220303_GP-C1	exp220303_GP-C1_F02	36.1618	0.209641	0.000329408	0.0561551	420	1360
NE119	GP-C1	exp220308_GP-C1	exp220308_GP-C1_E02	22.8694	0.264169	0.000859076	-0.0643164	390	1360
NE119	GP-C1	exp220308_GP-C1	exp220308_GP-C1_F02	27.6774	0.302123	0.00157004	-0.0933886	415	15
NE119	GP-C1	exp220309_GP-C1	exp220309_GP-C1_D11	77.1263	0.488013	0.00194504	-0.00571001	430	20
NE119	GP-C1	exp220309_GP-C1	exp220309_GP-C1_E02	31.9817	0.219847	0.000600425	0.0621441	405	1360
NE119	GP-C1	exp220309_GP-C1	exp220309_GP-C1_F02	42.7019	0.266266	0.000669785	0.084587	415	1360
NE119	GP-C1	exp220316_GP-C1	exp220316_GP-C1_D11	65.0479	0.45154	0.00145951	0.0946354	390	1360
NE119	GP-C1	exp220316_GP-C1	exp220316_GP-C1_E02	55.8148	0.418701	0.00132135	0.0604755	385	1360
NE119	GP-C1	exp220316_GP-C1	exp220316_GP-C1_F02	41.6419	0.335297	0.0011538	0.0260132	395	1360
NE119	GP-C1	exp220328_GP-C1	exp220328_GP-C1_D11	131.557	0.697671	0.001963	0.0679663	450	0
NE119	GP-C1	exp220328_GP-C1	exp220328_GP-C1_E02	47.4023	0.280686	0.000953867	0.00895503	425	0
NE119	GP-C1	exp220328_GP-C1	exp220328_GP-C1_F02	14.9444	0.099899	0.000289102	0.0212865	405	1360
NE188	GP-C1	exp220303_GP-C1	exp220303_GP-C1_B06	118.101	0.738622	0.00205297	-0.0714429	760	120
NE188	GP-C1	exp220303_GP-C1	exp220303_GP-C1_E03	161.293	0.921674	0.00216875	0.0858209	745	100
NE188	GP-C1	exp220303_GP-C1	exp220303_GP-C1_E05	161.712	0.987846	0.0025977	-0.023769	745	100
NE188	GP-C1	exp220308_GP-C1	exp220308_GP-C1_B06	91.396	0.573558	0.00154668	-0.0573277	840	140
NE188	GP-C1	exp220308_GP-C1	exp220308_GP-C1_E03	167.794	1.01196	0.00244432	0.0574364	760	95
NE188	GP-C1	exp220308_GP-C1	exp220308_GP-C1_E05	127.66	0.831925	0.00262373	-0.109106	780	150
NE188	GP-C1	exp220309_GP-C1	exp220309_GP-C1_B06	133.938	0.786733	0.00204509	-0.00478338	835	140
NE188	GP-C1	exp220309_GP-C1	exp220309_GP-C1_E03	154.071	0.91523	0.002444	0.0178503	765	125
NE188	GP-C1	exp220309_GP-C1	exp220309_GP-C1_E05	118.637	0.884021	0.00137884	-0.0272164	1360	165
NE188	GP-C1	exp220316_GP-C1	exp220316_GP-C1_B06	139.832	0.747994	0.00129449	0.178112	815	155
NE188	GP-C1	exp220316_GP-C1	exp220316_GP-C1_E03	139.093	0.874766	0.00254224	-0.0411571	765	160
NE188	GP-C1	exp220316_GP-C1	exp220316_GP-C1_E05	100.316	0.615453	0.00165889	0.0464403	760	155
NE188	GP-C1	exp220328_GP-C1	exp220328_GP-C1_B06	155.501	0.910902	0.00217509	0.00959368	685	0
NE188	GP-C1	exp220328_GP-C1	exp220328_GP-C1_E03	152.351	0.899119	0.00255238	0.0362726	680	80
NE188	GP-C1	exp220328_GP-C1	exp220328_GP-C1_E05	143.267	0.83919	0.00206969	0.110578	710	95
NE873	GP-C1	exp220303_GP-C1	exp220303_GP-C1_B04	34.2833	0.172463	0.000416423	0.0298885	730	0
NE873	GP-C1	exp220303_GP-C1	exp220303_GP-C1_C10	8.08633	0.0861907	0.000299265	-0.0559949	1360	160
NE873	GP-C1	exp220303_GP-C1	exp220303_GP-C1_D04	39.6452	0.196821	0.000443993	0.0675872	730	130
NE873	GP-C1	exp220308_GP-C1	exp220308_GP-C1_B04	34.2702	0.22399	0.000496841	-0.0289911	770	60
NE873	GP-C1	exp220308_GP-C1	exp220308_GP-C1_C10	3.1493	0.0953033	0.000430933	-0.0773602	720	130
NE873	GP-C1	exp220308_GP-C1	exp220308_GP-C1_D04	18.0945	0.161517	0.000442193	-0.0517109	740	110
NE873	GP-C1	exp220309_GP-C1	exp220309_GP-C1_B04	34.8183	0.191188	0.000375605	0.0319242	765	115
NE873	GP-C1	exp220309_GP-C1	exp220309_GP-C1_C10	2.73782	0.0442687	0.000305364	-0.0497199	740	145
NE873	GP-C1	exp220309_GP-C1	exp220309_GP-C1_D04	31.1432	0.175788	0.000379718	0.0138434	760	110
NE873	GP-C1	exp220316_GP-C1	exp220316_GP-C1_B04	32.7321	0.205978	0.000367547	-0.000685584	405	1360
NE873	GP-C1	exp220316_GP-C1	exp220316_GP-C1_C10	25.2107	0.156782	0.00060021	-0.0202015	655	105
NE873	GP-C1	exp220316_GP-C1	exp220316_GP-C1_D04	23.7929	0.153835	0.000558956	-0.00984191	650	115
NE873	GP-C1	exp220328_GP-C1	exp220328_GP-C1_B04	34.9016	0.156338	0.00051147	0.028128	345	0
NE873	GP-C1	exp220328_GP-C1	exp220328_GP-C1_C10	42.4248	0.189034	0.000739313	-0.00104074	345	0
NE873	GP-C1	exp220328_GP-C1	exp220328_GP-C1_D04	24.5751	0.108838	0.000317454	0.0371081	355	60
NE1140	GP-C1	exp220303_GP-C1	exp220303_GP-C1_B07	118.245	0.652436	0.00174781	0.0753135	680	65
NE1140	GP-C1	exp220303_GP-C1	exp220303_GP-C1_E10	99.5303	0.578452	0.00180991	0.0141536	755	185
NE1140	GP-C1	exp220303_GP-C1	exp220303_GP-C1_G05	119.319	0.688026	0.00177672	0.00263427	750	90
NE1140	GP-C1	exp220308_GP-C1	exp220308_GP-C1_B07	107.961	0.599101	0.00176884	-0.0498072	735	0
NE1140	GP-C1	exp220308_GP-C1	exp220308_GP-C1_G05	108.559	0.618693	0.00184735	-0.0824897	735	0
NE1140	GP-C1	exp220309_GP-C1	exp220309_GP-C1_B07	164.239	0.874816	0.00254698	-0.0680554	745	0
NE1140	GP-C1	exp220309_GP-C1	exp220309_GP-C1_E10	98.8603	0.536599	0.00116513	0.0132531	805	85
NE1140	GP-C1	exp220309_GP-C1	exp220309_GP-C1_G05	11.4872	0.0935232	0.000123816	7.88037e-05	1360	195
NE1140	GP-C1	exp220316_GP-C1	exp220316_GP-C1_B07	114.752	0.604741	0.00196886	-0.0505893	750	0
NE1140	GP-C1	exp220316_GP-C1	exp220316_GP-C1_E10	108.104	0.574234	0.00160839	0.00560197	800	80
NE1140	GP-C1	exp220316_GP-C1	exp220316_GP-C1_G05	92.1704	0.483371	0.00148469	-0.0124946	765	70
NE1140	GP-C1	exp220328_GP-C1	exp220328_GP-C1_B07	98.0609	0.59722	0.00136823	0.0268105	750	65
NE1140	GP-C1	exp220328_GP-C1	exp220328_GP-C1_E10	106.258	0.615019	0.00127541	0.0369132	735	0
NE1140	GP-C1	exp220328_GP-C1	exp220328_GP-C1_G05	157.471	0.789675	0.00184803	0.0687663	610	0
NE1532	GP-C1	exp220303_GP-C1	exp220303_GP-C1_E04	34.0688	0.173749	0.000339688	0.0368768	740	0
NE1532	GP-C1	exp220308_GP-C1	exp220308_GP-C1_E04	9.24667	0.106871	0.000340999	-0.0324105	690	1360
NE1532	GP-C1	exp220309_GP-C1	exp220309_GP-C1_B11	43.7545	0.258896	0.000745993	-0.0605955	825	65
NE1532	GP-C1	exp220309_GP-C1	exp220309_GP-C1_E04	23.8768	0.14336	0.000298977	0.00834982	775	130
NE1532	GP-C1	exp220309_GP-C1	exp220309_GP-C1_F11	30.7465	0.161448	0.000261122	0.0422713	765	140
NE1532	GP-C1	exp220316_GP-C1	exp220316_GP-C1_B11	41.3319	0.201979	0.000222161	0.0501507	555	1360
NE1532	GP-C1	exp220316_GP-C1	exp220316_GP-C1_E04	27.122	0.179649	0.000705674	-0.0640383	730	95
NE1532	GP-C1	exp220316_GP-C1	exp220316_GP-C1_F11	12.8724	0.0953727	0.000136745	-0.0199978	0	1360
NE1532	GP-C1	exp220328_GP-C1	exp220328_GP-C1_B11	23.0299	0.115183	0.000371942	-0.00215914	795	0
NE1532	GP-C1	exp220328_GP-C1	exp220328_GP-C1_E04	35.7713	0.158937	0.000420257	0.0595875	330	0
NE1532	GP-C1	exp220328_GP-C1	exp220328_GP-C1_F11	58.1262	0.287414	0.000758791	0.02238	1360	0
BPH3370-C4	GP-C1	exp220303_GP-C1	exp220303_GP-C1_B03	40.3457	0.236939	0.000320586	0.0422781	1155	0
BPH3370-C4	GP-C1	exp220303_GP-C1	exp220303_GP-C1_D09	42.7974	0.326266	0.000468882	-0.0379162	1210	145
BPH3370-C4	GP-C1	exp220303_GP-C1	exp220303_GP-C1_G08	52.5875	0.243424	0.000190107	0.143264	1240	325
BPH3370-C4	GP-C1	exp220308_GP-C1	exp220308_GP-C1_B03	4.65422	0.114396	0.000650054	-0.107991	890	265
BPH3370-C4	GP-C1	exp220308_GP-C1	exp220308_GP-C1_D09	-3.45346	0.104536	0.000688165	-0.140101	875	260
BPH3370-C4	GP-C1	exp220308_GP-C1	exp220308_GP-C1_G08	-17.8736	-0.0177241	0.000240961	-0.115557	835	215
BPH3370-C4	GP-C1	exp220309_GP-C1	exp220309_GP-C1_B03	41.3178	0.240329	0.000642141	0.0376441	825	220
BPH3370-C4	GP-C1	exp220309_GP-C1	exp220309_GP-C1_D09	29.4027	0.191347	0.000525525	0.00907209	815	245
BPH3370-C4	GP-C1	exp220309_GP-C1	exp220309_GP-C1_G08	16.6855	0.117274	0.000338561	-0.0236327	1045	210
BPH3370-C4	GP-C1	exp220316_GP-C1	exp220316_GP-C1_B03	41.5378	0.252861	0.00070949	0.0204143	825	210
BPH3370-C4	GP-C1	exp220316_GP-C1	exp220316_GP-C1_D09	22.0315	0.191639	0.000671877	-0.0506783	920	265
BPH3370-C4	GP-C1	exp220316_GP-C1	exp220316_GP-C1_G08	41.468	0.227584	0.000530389	0.069905	735	235
BPH3370-C4	GP-C1	exp220328_GP-C1	exp220328_GP-C1_B03	28.8607	0.148029	0.000192328	0.0593182	1090	210
BPH3370-C4	GP-C1	exp220328_GP-C1	exp220328_GP-C1_D09	49.8227	0.235038	0.000220976	0.133984	1065	200
BPH3370-C4	GP-C1	exp220328_GP-C1	exp220328_GP-C1_G08	26.2415	0.122715	0.000157694	0.0537132	975	195
BPH3370-A4	GP-C1	exp220303_GP-C1	exp220303_GP-C1_B05	26.0942	0.201819	0.000352458	-0.0447639	1200	140
BPH3370-A4	GP-C1	exp220303_GP-C1	exp220303_GP-C1_D08	46.5269	0.258334	0.00028609	0.0721776	1275	210
BPH3370-A4	GP-C1	exp220303_GP-C1	exp220303_GP-C1_F06	54.0937	0.30128	0.000351579	0.071253	1165	155
BPH3370-A4	GP-C1	exp220308_GP-C1	exp220308_GP-C1_B05	-13.4779	0.0692496	0.000725258	-0.205746	925	205
BPH3370-A4	GP-C1	exp220308_GP-C1	exp220308_GP-C1_D08	7.19259	0.143931	0.000626985	-0.113079	860	185
BPH3370-A4	GP-C1	exp220308_GP-C1	exp220308_GP-C1_F06	-10.3747	0.0134799	0.000247791	-0.0917077	885	220
BPH3370-A4	GP-C1	exp220309_GP-C1	exp220309_GP-C1_B05	119.426	0.716856	0.00191531	-0.0187064	830	145
BPH3370-A4	GP-C1	exp220309_GP-C1	exp220309_GP-C1_D08	18.5701	0.121136	0.000320257	-0.00605976	860	200
BPH3370-A4	GP-C1	exp220309_GP-C1	exp220309_GP-C1_F06	21.9069	0.165548	0.000494674	-0.027344	880	180
BPH3370-A4	GP-C1	exp220316_GP-C1	exp220316_GP-C1_B05	29.1693	0.188174	0.000461686	0.0212422	690	1360
BPH3370-A4	GP-C1	exp220316_GP-C1	exp220316_GP-C1_D08	45.8958	0.274277	0.000666212	0.0473352	855	260
BPH3370-A4	GP-C1	exp220316_GP-C1	exp220316_GP-C1_F06	21.6894	0.1525	0.000500018	-0.0100808	810	265
BPH3370-A4	GP-C1	exp220328_GP-C1	exp220328_GP-C1_B05	78.6954	0.405531	0.000425816	0.157912	1125	0
BPH3370-A4	GP-C1	exp220328_GP-C1	exp220328_GP-C1_D08	34.0057	0.170005	0.000177293	0.087166	1030	415
BPH3370-A4	GP-C1	exp220328_GP-C1	exp220328_GP-C1_F06	55.5152	0.301558	0.00030411	0.11154	1105	245
BPH3370-E2	GP-C1	exp220303_GP-C1	exp220303_GP-C1_B09	26.5748	0.212557	0.000378883	-0.0505731	1205	150
BPH3370-E2	GP-C1	exp220303_GP-C1	exp220303_GP-C1_C08	34.0601	0.275146	0.000504314	-0.0701817	1260	140
BPH3370-E2	GP-C1	exp220303_GP-C1	exp220303_GP-C1_F07	81.6015	0.382044	0.000409598	0.179142	1165	210
BPH3370-E2	GP-C1	exp220308_GP-C1	exp220308_GP-C1_B09	10.0964	0.1844	0.000867648	-0.153457	1070	285
BPH3370-E2	GP-C1	exp220308_GP-C1	exp220308_GP-C1_C08	16.8282	0.238557	0.00100526	-0.140732	925	270
BPH3370-E2	GP-C1	exp220308_GP-C1	exp220308_GP-C1_F07	41.7752	0.333151	0.00094035	-0.0573987	980	260
BPH3370-E2	GP-C1	exp220309_GP-C1	exp220309_GP-C1_B09	34.6116	0.232745	0.000756338	-0.0118193	795	185
BPH3370-E2	GP-C1	exp220309_GP-C1	exp220309_GP-C1_C08	28.2723	0.206608	0.000710041	-0.0349937	870	215
BPH3370-E2	GP-C1	exp220309_GP-C1	exp220309_GP-C1_F07	54.777	0.384239	0.00129762	-0.0681942	885	220
BPH3370-E2	GP-C1	exp220316_GP-C1	exp220316_GP-C1_B09	38.4709	0.24133	0.00072019	0.0142462	785	265
BPH3370-E2	GP-C1	exp220316_GP-C1	exp220316_GP-C1_C08	45.4812	0.29842	0.000894449	-0.0127525	880	255
BPH3370-E2	GP-C1	exp220316_GP-C1	exp220316_GP-C1_F07	76.8642	0.532181	0.0012577	-0.056854	1360	175
BPH3370-E2	GP-C1	exp220328_GP-C1	exp220328_GP-C1_B09	46.9775	0.312429	0.00045725	0.0365459	1115	230
BPH3370-E2	GP-C1	exp220328_GP-C1	exp220328_GP-C1_C08	37.4582	0.226144	0.000318592	0.0457126	1045	195
BPH3370-E2	GP-C1	exp220328_GP-C1	exp220328_GP-C1_F07	32.9528	0.155703	0.000149667	0.0867472	1110	350
BPH3370-F3	GP-C1	exp220303_GP-C1	exp220303_GP-C1_B10	-0.353968	0.0778349	0.000359192	-0.107345	1130	120
BPH3370-F3	GP-C1	exp220303_GP-C1	exp220303_GP-C1_F08	31.8872	0.185086	0.000270625	0.0174248	1145	140
BPH3370-F3	GP-C1	exp220303_GP-C1	exp220303_GP-C1_G03	29.8753	0.157178	0.000257458	0.0254136	985	130
BPH3370-F3	GP-C1	exp220308_GP-C1	exp220308_GP-C1_B10	31.9546	0.277936	0.00137693	-0.183141	865	170
BPH3370-F3	GP-C1	exp220308_GP-C1	exp220308_GP-C1_F08	-3.47981	0.095961	0.000647698	-0.0942896	655	205
BPH3370-F3	GP-C1	exp220308_GP-C1	exp220308_GP-C1_G03	33.0651	0.261571	0.00119234	-0.0717545	650	200
BPH3370-F3	GP-C1	exp220309_GP-C1	exp220309_GP-C1_B10	53.4384	0.398454	0.00148949	-0.0281018	630	150
BPH3370-F3	GP-C1	exp220309_GP-C1	exp220309_GP-C1_F08	24.2239	0.203664	0.000763816	0.00674943	600	205
BPH3370-F3	GP-C1	exp220309_GP-C1	exp220309_GP-C1_G03	65.779	0.44663	0.00150371	0.0510039	610	205
BPH3370-F3	GP-C1	exp220316_GP-C1	exp220316_GP-C1_B10	63.038	0.396533	0.0013964	-0.0207972	655	165
BPH3370-F3	GP-C1	exp220316_GP-C1	exp220316_GP-C1_F08	33.7531	0.245167	0.000851599	0.0182538	650	245
BPH3370-F3	GP-C1	exp220316_GP-C1	exp220316_GP-C1_G03	44.0712	0.351517	0.00158211	-0.112247	680	190
BPH3370-F3	GP-C1	exp220328_GP-C1	exp220328_GP-C1_B10	61.9207	0.319394	0.000750807	-0.00455521	1360	0
BPH3370-F3	GP-C1	exp220328_GP-C1	exp220328_GP-C1_F08	34.1308	0.152052	0.000142235	0.0846885	755	1360
BPH3370-F3	GP-C1	exp220328_GP-C1	exp220328_GP-C1_G03	16.2918	0.0979492	0.000289144	0.00887785	715	175
BPH3370-G3	GP-C1	exp220303_GP-C1	exp220303_GP-C1_C02	65.3728	0.551295	0.000679545	-0.00853344	1360	110
BPH3370-G3	GP-C1	exp220303_GP-C1	exp220303_GP-C1_D07	78.1477	0.578639	0.000706659	0.00680954	1360	175
BPH3370-G3	GP-C1	exp220303_GP-C1	exp220303_GP-C1_F03	92.1566	0.623194	0.000672642	0.0950993	1360	80
BPH3370-G3	GP-C1	exp220308_GP-C1	exp220308_GP-C1_C02	59.964	0.566582	0.000804649	-0.0504453	1360	210
BPH3370-G3	GP-C1	exp220308_GP-C1	exp220308_GP-C1_D07	91.0478	0.825882	0.00103687	-0.0619643	1360	125
BPH3370-G3	GP-C1	exp220308_GP-C1	exp220308_GP-C1_F03	117.802	0.831894	0.000958489	0.0604223	1360	120
BPH3370-G3	GP-C1	exp220309_GP-C1	exp220309_GP-C1_C02	109.422	0.785758	0.000952164	0.0529816	1360	175
BPH3370-G3	GP-C1	exp220309_GP-C1	exp220309_GP-C1_D07	139.825	0.988178	0.00158981	-0.0546903	1290	140
BPH3370-G3	GP-C1	exp220309_GP-C1	exp220309_GP-C1_F03	133.888	1.00043	0.00130621	0.0322985	1360	150
BPH3370-G3	GP-C1	exp220316_GP-C1	exp220316_GP-C1_C02	147.603	0.99361	0.00121151	0.147763	1360	185
BPH3370-G3	GP-C1	exp220316_GP-C1	exp220316_GP-C1_D07	67.6833	0.580238	0.000870399	-0.0370626	1360	225
BPH3370-G3	GP-C1	exp220316_GP-C1	exp220316_GP-C1_F03	91.2134	0.811789	0.00128069	-0.0581632	1360	200
BPH3370-G3	GP-C1	exp220328_GP-C1	exp220328_GP-C1_C02	54.1329	0.441272	0.000421022	0.0500096	1360	130
BPH3370-G3	GP-C1	exp220328_GP-C1	exp220328_GP-C1_D07	64.6506	0.500691	0.000469407	0.0974185	1360	250
BPH3370-G3	GP-C1	exp220328_GP-C1	exp220328_GP-C1_F03	57.1084	0.496562	0.000591325	0.0472492	1360	115
BPH3370-D4	GP-C1	exp220303_GP-C1	exp220303_GP-C1_C05	77.7982	0.625843	0.00116315	0.0106858	1360	165
BPH3370-D4	GP-C1	exp220303_GP-C1	exp220303_GP-C1_E06	85.1211	0.675354	0.00105033	0.0164398	1360	210
BPH3370-D4	GP-C1	exp220303_GP-C1	exp220303_GP-C1_F09	75.4899	0.614489	0.000967724	-0.0181664	1360	155
BPH3370-D4	GP-C1	exp220308_GP-C1	exp220308_GP-C1_C05	78.4639	0.799047	0.00128145	-0.186545	1360	130
BPH3370-D4	GP-C1	exp220308_GP-C1	exp220308_GP-C1_E06	57.2215	0.560594	0.000945971	-0.136125	1360	160
BPH3370-D4	GP-C1	exp220308_GP-C1	exp220308_GP-C1_F09	81.4013	0.731701	0.00100048	-0.0643423	1360	190
BPH3370-D4	GP-C1	exp220309_GP-C1	exp220309_GP-C1_C05	107.4	0.847234	0.00112461	-0.0399469	1360	145
BPH3370-D4	GP-C1	exp220309_GP-C1	exp220309_GP-C1_E06	92.7671	0.706604	0.00122549	-0.0598933	1360	180
BPH3370-D4	GP-C1	exp220309_GP-C1	exp220309_GP-C1_F09	78.5882	0.559796	0.000922598	-0.00637781	1360	195
BPH3370-D4	GP-C1	exp220316_GP-C1	exp220316_GP-C1_C05	104.7	0.772255	0.00104763	0.0095107	1360	95
BPH3370-D4	GP-C1	exp220316_GP-C1	exp220316_GP-C1_E06	83.8607	0.643672	0.00106332	-0.0196383	1360	235
BPH3370-D4	GP-C1	exp220316_GP-C1	exp220316_GP-C1_F09	55.4587	0.550496	0.000865946	-0.0940099	1360	220
BPH3370-D4	GP-C1	exp220328_GP-C1	exp220328_GP-C1_C05	84.5717	0.595707	0.000729359	0.0251713	1360	100
BPH3370-D4	GP-C1	exp220328_GP-C1	exp220328_GP-C1_E06	74.9831	0.535838	0.00045855	0.0806377	1360	105
BPH3370-D4	GP-C1	exp220328_GP-C1	exp220328_GP-C1_F09	91.0378	0.696094	0.00100626	0.0800545	1360	120
BPH3370-D3	GP-C1	exp220303_GP-C1	exp220303_GP-C1_C06	77.0818	0.605726	0.000774543	0.00796513	1360	150
BPH3370-D3	GP-C1	exp220303_GP-C1	exp220303_GP-C1_C07	83.1744	0.570796	0.00074286	0.0487615	1360	225
BPH3370-D3	GP-C1	exp220303_GP-C1	exp220303_GP-C1_E08	83.9201	0.605891	0.000823685	0.0610801	1360	240
BPH3370-D3	GP-C1	exp220308_GP-C1	exp220308_GP-C1_C06	78.0859	0.702097	0.00123461	-0.150394	1200	175
BPH3370-D3	GP-C1	exp220308_GP-C1	exp220308_GP-C1_C07	127.506	0.84047	0.00122427	0.0103196	1175	120
BPH3370-D3	GP-C1	exp220308_GP-C1	exp220308_GP-C1_E08	90.9369	0.719372	0.00102529	-0.065585	1300	115
BPH3370-D3	GP-C1	exp220309_GP-C1	exp220309_GP-C1_C06	164.743	1.01293	0.00199367	-0.0285859	980	105
BPH3370-D3	GP-C1	exp220309_GP-C1	exp220309_GP-C1_C07	159.713	0.99455	0.00183511	-0.0260813	1010	120
BPH3370-D3	GP-C1	exp220309_GP-C1	exp220309_GP-C1_E08	88.1765	0.580608	0.000945088	0.0213222	1120	170
BPH3370-D3	GP-C1	exp220316_GP-C1	exp220316_GP-C1_C06	133.036	0.945099	0.0012182	0.0415827	1280	145
BPH3370-D3	GP-C1	exp220316_GP-C1	exp220316_GP-C1_C07	75.3715	0.592799	0.000971886	-0.0513079	1245	220
BPH3370-D3	GP-C1	exp220316_GP-C1	exp220316_GP-C1_E08	98.1715	0.701185	0.000954933	0.0161777	1230	200
BPH3370-D3	GP-C1	exp220328_GP-C1	exp220328_GP-C1_C06	100.125	0.673531	0.000930395	0.0713033	1360	120
BPH3370-D3	GP-C1	exp220328_GP-C1	exp220328_GP-C1_C07	83.8401	0.625162	0.000861757	0.0740238	1360	185
BPH3370-D3	GP-C1	exp220328_GP-C1	exp220328_GP-C1_E08	75.1481	0.586275	0.000764965	0.071014	1360	185

## Sheet: Sheet2
variable	comment
sample_id
plate
experiment_id
well_id
AUC_death	Area under the curve
max_death	Peak PI uptake
max_rate_death	Maxium rate in PI uptake
min_death	Trough PI uptake
time_of_max_death	Time of peak PI uptake
time_of_min_death	Time of trough
