# Supplementary material for: A high-throughput cytotoxicity screening platform reveals agr-independent mutations in bacteraemia-associated Staphylococcus aureus that promote intracellular persistence
Source: eLife. 2023 Jun 8;12:e84778. doi: 10.7554/eLife.84778 (PMC10259494; doi:10.7554/eLife.84778)
Supplement: Supplementary file 2. [file elife-84778-supp2.xlsx]

## Sheet: Sheet1
Supplementary file 2: quantification of confocal microscopy. Percentage cells infected/field of view
Time post infection	S. aureus JE2	S. aureus JE2 tn::agrA
3h	52.381	71.4286
	50	64.8649
	34.7826	57.5
	45
8h	27.7778	66.6667
	38.4615	55
	26.6667	73.6842
	42.8571	61.5385
24h	8.69565	70.8333
	15.3846	55.5556
	6.66667	69.2308
		88.8889
		56
