# Supplementary material for: A high-throughput cytotoxicity screening platform reveals agr-independent mutations in bacteraemia-associated Staphylococcus aureus that promote intracellular persistence
Source: eLife. 2023 Jun 8;12:e84778. doi: 10.7554/eLife.84778 (PMC10259494; doi:10.7554/eLife.84778)
Supplement: Supplementary file 3. — Legend: Variable details. [file elife-84778-supp3.xlsx]

## Sheet: dataset
Supplementary file 3: Summary of the 387 S. aureus clinical isolates
sample_id	episode_id	episode_id2	baseline_isolate	pair_id	iso_class	ST	mecA
BPH2700	VAN-001	P_51	Yes			78	present
BPH2701	VAN-001	P_51	No			22	present
BPH2702	VAN-002		Yes			15	absent
BPH2703	VAN-003		Yes			8	absent
BPH2704	VAN-004	P_01	Yes	BPH2705--BPH2704	iso2	93	present
BPH2705	VAN-004	P_01	No	BPH2705--BPH2704	iso1	93	present
BPH2706	VAN-005		Yes			508	absent
BPH2707	VAN-006		Yes			8	absent
BPH2708	VAN-007	P_02	Yes			97	absent
BPH2709	VAN-007	P_02	No			97	absent
BPH2710	VAN-008		Yes	BPH3382--BPH2710	iso2	239	present
BPH2711	VAN-009		Yes			22	absent
BPH2712	VAN-010		Yes			15	absent
BPH2713	VAN-011		Yes			45	absent
BPH2714	VAN-011		Yes			45	absent
BPH2715	VAN-012		Yes			5	absent
BPH2716	VAN-013		Yes			5	present
BPH2717	VAN-014		Yes			45	absent
BPH2718	VAN-015		Yes			239	present
BPH2719	VAN-016		Yes			5	absent
BPH2720	VAN-017		Yes	BPH2858--BPH2720	iso2	22	present
BPH2721	VAN-018		Yes			8	absent
BPH2722	VAN-019		Yes			188	absent
BPH2723	VAN-020		Yes			239	present
BPH2724	VAN-021		Yes			-	absent
BPH2725	VAN-022		Yes			45	absent
BPH2726	VAN-023	P_52	Yes			239	absent
BPH2727	VAN-023	P_52	No			239	absent
BPH2728	VAN-024	P_03	Yes	BPH2728--BPH2729	iso1	45	present
BPH2729	VAN-024	P_03	No	BPH2728--BPH2729	iso2	45	present
BPH2730	VAN-024	P_03	No			45	present
BPH2731	VAN-025		Yes			-	absent
BPH2732	VAN-026	P_04	Yes			45	absent
BPH2733	VAN-026	P_04	No			45	absent
BPH2734	VAN-026	P_04	No			34	absent
BPH2735	VAN-027		Yes			22	present
BPH2736	VAN-028		Yes			45	absent
BPH2737	VAN-029	P_05	Yes			-	absent
BPH2738	VAN-029	P_05	No			-	absent
BPH2739	VAN-030	P_06	Yes			-	absent
BPH2740	VAN-030	P_06	No			12	absent
BPH2741	VAN-031		Yes			109	absent
BPH2742	VAN-032		Yes			22	present
BPH2743	VAN-033		Yes			5	absent
BPH2744	VAN-034		Yes			-	absent
BPH2745	VAN-035		Yes			72	absent
BPH2746	VAN-037		Yes			8	absent
BPH2747	VAN-038	P_53	Yes			239	present
BPH2748	VAN-038	P_53	No			239	present
BPH2749	VAN-039		Yes			20	absent
BPH2750	VAN-040	P_07	Yes			39	absent
BPH2751	VAN-040	P_07	No			39	absent
BPH2752	VAN-041		Yes	BPH2752--BPH2761	iso1	30	absent
BPH2753	VAN-042		Yes			121	absent
BPH2754	VAN-043	P_08	Yes			5	absent
BPH2755	VAN-043	P_08	No			-	absent
BPH2756	VAN-044		Yes			567	absent
BPH2757	VAN-045		Yes			5	absent
BPH2758	VAN-046		Yes			5	absent
BPH2759	VAN-047		Yes			30	absent
BPH2760	VAN-048		Yes			1	absent
BPH2761	VAN-049		Yes	BPH2752--BPH2761	iso2	30	absent
BPH2762	VAN-049		Yes			5	absent
BPH2763	VAN-050	P_54	Yes	BPH2764--BPH2763	iso2	78	present
BPH2764	VAN-050	P_54	No	BPH2764--BPH2763	iso1	78	present
BPH2765	VAN-051		Yes			15	absent
BPH2766	VAN-052		Yes			45	absent
BPH2767	VAN-053		Yes			-	absent
BPH2768	VAN-054		Yes			30	absent
BPH2769	VAN-055		Yes			188	absent
BPH2770	VAN-056	P_55	Yes			45	present
BPH2771	VAN-056	P_55	No			45	present
BPH2773	VAN-058		Yes			188	absent
BPH2774	VAN-059		Yes			22	present
BPH2775	VAN-060		Yes			8	absent
BPH2776	VAN-061		Yes			30	absent
BPH2777	VAN-062	P_09	Yes			30	absent
BPH2778	VAN-062	P_09	No			30	absent
BPH2779	VAN-063		Yes			239	present
BPH2780	VAN-064		Yes			239	present
BPH2781	VAN-065		Yes			239	present
BPH2782	VAN-066		Yes			-	absent
BPH2783	VAN-067		Yes			22	present
BPH2784	VAN-068		Yes	BPH2860--BPH2784	iso2	88	absent
BPH2785	VAN-069		Yes			-	present
BPH2786	VAN-070		Yes			5	absent
BPH2787	VAN-071		Yes	BPH2787--BPH3688	iso1	239	present
BPH2788	VAN-072		Yes			15	absent
BPH2789	VAN-073		Yes			109	absent
BPH2790	VAN-074		Yes			22	present
BPH2791	VAN-075		Yes			6	absent
BPH2792	VAN-076		Yes			45	present
BPH2793	VAN-077		Yes			5	absent
BPH2794	VAN-078		Yes			5	absent
BPH2795	VAN-079		Yes			291	absent
BPH2796	VAN-080		Yes			97	absent
BPH2797	VAN-081		Yes			12	absent
BPH2798	VAN-082		Yes	BPH2946--BPH2798	iso2	239	present
BPH2799	VAN-082		Yes			239	present
BPH2800	VAN-082		Yes			239	present
BPH2801	VAN-083	P_10	Yes			59	absent
BPH2802	VAN-083	P_10	Yes			59	absent
BPH2803	VAN-083	P_10	No			59	absent
BPH2804	VAN-083	P_10	No			1	absent
BPH2805	VAN-084		Yes			-	absent
BPH2806	VAN-085		Yes			45	absent
BPH2807	VAN-086		Yes			22	present
BPH2808	VAN-086		Yes			22	present
BPH2809	VAN-087		Yes			-	absent
BPH2810	VAN-088		Yes			508	absent
BPH2811	VAN-089		Yes			15	absent
BPH2812	VAN-090		Yes			1	present
BPH2813	VAN-090		Yes			1	present
BPH2814	VAN-090		Yes			1	present
BPH2815	VAN-090		Yes			1	present
BPH2816	VAN-091		Yes			15	absent
BPH2817	VAN-092		Yes			-	absent
BPH2818	VAN-093		Yes			5	absent
BPH2819	VAN-094	P_11	Yes			5	absent
BPH2820	VAN-094	P_11	No			5	absent
BPH2821	VAN-095		Yes			12	absent
BPH2822	VAN-096		Yes			1	absent
BPH2823	VAN-097		Yes			78	present
BPH2824	VAN-098		Yes			239	present
BPH2825	VAN-098		Yes			239	present
BPH2827	VAN-100		Yes			239	present
BPH2828	VAN-101		Yes			22	absent
BPH2829	VAN-102		Yes			8	absent
BPH2830	VAN-103		Yes			-	absent
BPH2831	VAN-104		Yes			8	absent
BPH2832	VAN-104		Yes			8	absent
BPH2833	VAN-104		Yes			8	absent
BPH2834	VAN-105		Yes			-	absent
BPH2835	VAN-106		Yes			72	absent
BPH2836	VAN-107		Yes			8	absent
BPH2837	VAN-108		Yes			59	absent
BPH2838	VAN-109		Yes			12	absent
BPH2839	VAN-110		Yes			1	absent
BPH2840	VAN-111	P_12	Yes			8	absent
BPH2841	VAN-111	P_12	No			8	absent
BPH2842	VAN-112		Yes			22	present
BPH2843	VAN-112		Yes			22	present
BPH2844	VAN-113		Yes			20	absent
BPH2845	VAN-114		Yes			1	present
BPH2846	VAN-115		Yes			-	absent
BPH2847	VAN-116		Yes			22	present
BPH2848	VAN-117		Yes			1	absent
BPH2849	VAN-118		Yes			-	absent
BPH2850	VAN-118		Yes			-	absent
BPH2851	VAN-119		Yes			-	present
BPH2852	VAN-121		Yes			101	absent
BPH2853	VAN-122		Yes			30	absent
BPH2854	VAN-123		Yes			8	present
BPH2855	VAN-124		Yes			15	absent
BPH2856	VAN-125		Yes			22	absent
BPH2857	VAN-126		Yes			101	absent
BPH2858	VAN-126		Yes	BPH2858--BPH2720	iso1	22	present
BPH2859	VAN-127		Yes			93	present
BPH2860	VAN-128		Yes	BPH2860--BPH2784	iso1	88	absent
BPH2861	VAN-129	P_13	Yes			39	absent
BPH2862	VAN-129	P_13	No			39	absent
BPH2863	VAN-130	P_14	Yes			-	absent
BPH2864	VAN-130	P_14	No			-	absent
BPH2865	VAN-131		Yes			46	absent
BPH2866	VAN-132		Yes			15	absent
BPH2867	VAN-132		Yes			15	absent
BPH2869	VAN-134		Yes	BPH2869--BPH3662	iso1	239	present
BPH2872	VAN-137	P_15	Yes			-	absent
BPH2873	VAN-137	P_15	No			-	absent
BPH2876	VAN-140		Yes			78	present
BPH2877	VAN-140		Yes			78	present
BPH2881	VAN-144	P_56	Yes			1756	present
BPH2882	VAN-144	P_56	No			1756	present
BPH2883	VAN-145	P_16	Yes			5	absent
BPH2884	VAN-145	P_16	No			5	absent
BPH2887	VAN-148	P_17	Yes			45	present
BPH2888	VAN-148	P_17	No			45	present
BPH2890	VAN-150		Yes			78	present
BPH2891	VAN-150		Yes			78	present
BPH2896	VAN-155		Yes			239	present
BPH2897	VAN-156	P_18	Yes			34	absent
BPH2898	VAN-156	P_18	No			34	absent
BPH2902	VAN-160	P_19	Yes	BPH2904--BPH2902	iso2	45	present
BPH2904	VAN-160	P_19	No	BPH2904--BPH2902	iso1	45	present
BPH2907	VAN-162	P_20	No			239	present
BPH2922	VAN-176		Yes			1	absent
BPH2923	VAN-176		Yes	BPH2924--BPH2923	iso2	1	absent
BPH2924	VAN-176		Yes	BPH2924--BPH2923	iso1	1	absent
BPH2925	VAN-176		Yes		iso1	1	absent
BPH2926	VAN-176		Yes		iso2	1	absent
BPH2934	VAN-184		Yes			291	absent
BPH2938	VAN-188		Yes			30	absent
BPH2942	VAN-192	P_21	Yes			5	absent
BPH2943	VAN-192	P_21	No			5	absent
BPH2946	VAN-195		Yes	BPH2946--BPH2798	iso1	239	present
BPH2947	VAN-196	P_22	Yes			239	present
BPH2948	VAN-196	P_22	No			239	present
BPH2949	VAN-197		Yes			1	present
BPH2952	VAN-200	P_57	Yes			45	present
BPH2953	VAN-200	P_57	No			45	present
BPH2959	VAN-206	P_23	Yes			5	absent
BPH2960	VAN-206	P_23	No			5	absent
BPH2961	VAN-206	P_23	No			5	absent
BPH2962	VAN-207	P_24	Yes			20	absent
BPH2963	VAN-207	P_24	No	BPH2963--BPH2964	iso1	20	absent
BPH2964	VAN-207	P_24	No	BPH2963--BPH2964	iso2	20	absent
BPH2965	VAN-208	P_25	Yes			8	absent
BPH2966	VAN-208	P_25	No			8	absent
BPH2973	VAN-215	P_26	Yes			39	absent
BPH2974	VAN-215	P_26	No			39	absent
BPH2975	VAN-215	P_26	No			39	absent
BPH2976	VAN-216	P_27	Yes			-	present
BPH2977	VAN-216	P_27	No			-	present
BPH2978	VAN-216	P_27	No			-	present
BPH2979	VAN-216	P_27	No			-	present
BPH2980	VAN-216	P_27	No			-	present
BPH2981	VAN-216	P_27	No			-	present
BPH2982	VAN-216	P_27	No			-	present
BPH2987	VAN-222	P_28	Yes			39	absent
BPH2988	VAN-222	P_28	No			39	absent
BPH2989	VAN-223	P_29	Yes			2176	absent
BPH2990	VAN-223	P_29	No			2176	absent
BPH2991	VAN-223	P_29	No			2176	absent
BPH3202	VSS-003		Yes			239	present
BPH3204	VSS-005		Yes			1282	present
BPH3208	VSS-009		Yes	BPH3208--BPH3660	iso1	239	present
BPH3216	VSS-017		Yes			188	absent
BPH3220	VSS-021		Yes			239	present
BPH3225	VSS-026		Yes			-	absent
BPH3226	VSS-027		Yes			1282	present
BPH3236	VSS-037		Yes			-	present
BPH3244	VSS-045		Yes			239	present
BPH3246	VSS-047		Yes			1	present
BPH3250	VSS-051		Yes			239	present
BPH3252	VSS-053		Yes			5	present
BPH3258	VSS-059		Yes			-	present
BPH3260	VSS-061		Yes			239	present
BPH3262	VSS-063		Yes			239	present
BPH3268	VSS-069		Yes			88	absent
BPH3270	VSS-071		Yes			188	absent
BPH3272	VSS-073		Yes			239	present
BPH3274	VSS-075		Yes	BPH3282--BPH3274	iso2	5	present
BPH3276	VSS-077		Yes			239	present
BPH3282	VSS-083		Yes	BPH3282--BPH3274	iso1	5	present
BPH3284	VSS-085		Yes			239	present
BPH3292	VSS-093		Yes			1282	present
BPH3294	VSS-095		Yes			1	present
BPH3304	VSS-105		Yes			88	absent
BPH3306	VSS-107		Yes			239	present
BPH3316	VSS-117		Yes			-	present
BPH3320	VSS-121		Yes			1282	present
BPH3328	VSS-129		Yes			239	present
BPH3332	VSS-133		Yes			239	present
BPH3336	VSS-137	P_30	Yes	BPH3336--BPH3733	iso1	5	present
BPH3337	VSS-138	P_31	Yes			8	absent
BPH3338	VSS-139		Yes			45	present
BPH3340	VSS-141		Yes			45	present
BPH3346	VSS-147		Yes			239	present
BPH3348	VSS-149	P_32	Yes	BPH3368--BPH3348	iso2	239	present
BPH3350	VSS-151		Yes			45	absent
BPH3352	VSS-153	P_33	Yes			45	present
BPH3356	VSS-157	P_34	Yes			239	present
BPH3358	VSS-159		Yes			30	present
BPH3360	VSS-161		Yes			239	present
BPH3361	VSS-162		Yes			8	absent
BPH3362	VSS-163		Yes	BPH3366--BPH3362	iso2	239	present
BPH3366	VSS-167		Yes	BPH3366--BPH3362	iso1	239	present
BPH3367	VSS-170		Yes			101	absent
BPH3368	VSS-171		Yes	BPH3368--BPH3348	iso1	239	present
BPH3370	VSS-173		Yes			239	present
BPH3372	VSS-175		Yes			239	present
BPH3376	VSS-179		Yes			239	present
BPH3381	VSS-184	P_35	Yes			1795	absent
BPH3382	VSS-185		Yes	BPH3382--BPH2710	iso1	239	absent
BPH3383	VSS-186		Yes			199	absent
BPH3384	VSS-187		Yes			22	present
BPH3389	VSS-192		Yes			15	absent
BPH3394	VSS-197		Yes			239	present
BPH3396	VSS-199		Yes			22	present
BPH3401	VSS-205	P_38	Yes			239	present
BPH3403	VSS-207		Yes	BPH3403--BPH3499	iso1	239	present
BPH3412	VSS-216		Yes			5	absent
BPH3413	VSS-217		Yes			239	present
BPH3415	VSS-219		Yes			239	present
BPH3416	VSS-220		Yes			5	absent
BPH3417	VSS-221	P_39	No			239	present
BPH3423	VSS-227	P_40	No			20	absent
BPH3425	VSS-229		Yes			6	absent
BPH3427	VSS-231	P_41	Yes			22	present
BPH3431	VSS-235		Yes			239	present
BPH3433	VSS-237	P_42	Yes		iso2	239	present
BPH3434	VSS-238		Yes	BPH3746--BPH3434	iso2	20	absent
BPH3435	VSS-239		Yes			239	present
BPH3437	VSS-241	P_43	Yes			22	present
BPH3439	VSS-243		Yes			239	present
BPH3443	VSS-247		Yes			239	present
BPH3448	VSS-252		Yes			30	absent
BPH3451	VSS-255		Yes			239	present
BPH3453	VSS-257	P_44	Yes			239	present
BPH3457	VSS-261		Yes			239	present
BPH3459	VSS-263		Yes			5	absent
BPH3460	VSS-264		Yes			15	absent
BPH3462	VSS-266		Yes			5	absent
BPH3463	VSS-267		Yes			239	present
BPH3465	VSS-269		Yes			239	present
BPH3469	VSS-273		Yes			239	present
BPH3473	VSS-277		Yes			-	present
BPH3477	VSS-281		Yes			45	present
BPH3479	VSS-283		Yes			45	present
BPH3481	VSS-285		Yes			22	present
BPH3482	VSS-286		Yes			20	absent
BPH3485	VSS-289		Yes			239	present
BPH3489	VSS-293		Yes			22	present
BPH3493	VSS-297		Yes			239	present
BPH3499	VSS-303		Yes	BPH3403--BPH3499	iso2	239	present
BPH3501	VSS-305		Yes			22	present
BPH3508	VSS-312		Yes			20	absent
BPH3511	VSS-315		Yes			239	present
BPH3523	VSS-327		Yes	BPH3523--BPH3739	iso1	239	present
BPH3524	VSS-328		Yes			30	absent
BPH3527	VSS-331		Yes			239	present
BPH3529	VSS-333		Yes			239	present
BPH3535	VSS-339	P_46	Yes			239	present
BPH3545	VSS-349		Yes		iso2	239	present
BPH3547	VSS-351		Yes		iso1	239	present
BPH3548	VSS-352		Yes			30	absent
BPH3568	VSS-375		Yes	BPH3568--BPH3590	iso1	22	absent
BPH3584	VSS-393		Yes			121	absent
BPH3588	VSS-397		Yes			121	absent
BPH3590	VSS-399		Yes	BPH3568--BPH3590	iso2	22	present
BPH3596	VSS-411		Yes			-	present
BPH3602	VSS-417		Yes			22	present
BPH3612	VSS-431		Yes			22	present
BPH3628	VSS-447		Yes			-	present
BPH3632	VSS-451		Yes			239	present
BPH3634	VSS-453		Yes			239	present
BPH3636	VSS-455		Yes			239	present
BPH3638	VSS-457		Yes			239	present
BPH3640	VSS-459		Yes			239	present
BPH3643	VSS-462		Yes	BPH3700--BPH3643	iso2	239	absent
BPH3648	VSS-467		Yes			239	present
BPH3650	VSS-469		Yes			239	present
BPH3652	VSS-471		Yes	BPH3694--BPH3652	iso2	239	present
BPH3658	VSS-477		Yes			239	present
BPH3660	VSS-479		Yes	BPH3208--BPH3660	iso2	239	absent
BPH3662	VSS-481		Yes	BPH2869--BPH3662	iso2	239	present
BPH3664	VSS-483		Yes			239	present
BPH3666	VSS-485		Yes			239	present
BPH3668	VSS-487		Yes			239	present
BPH3670	VSS-489		Yes			239	present
BPH3672	VSS-491		Yes	BPH3672--BPH3757	iso1	239	present
BPH3674	VSS-493	P_47	Yes			239	present
BPH3682	VSS-505		Yes	BPH3682--BPH3684	iso1	239	present
BPH3684	VSS-507		Yes	BPH3682--BPH3684	iso2	239	present
BPH3686	VSS-509		Yes			239	present
BPH3688	VSS-511		Yes	BPH2787--BPH3688	iso2	239	present
BPH3692	VSS-521		Yes			239	present
BPH3694	VSS-525	P_49	Yes	BPH3694--BPH3652	iso1	239	present
BPH3696	VSS-529		Yes			239	present
BPH3700	VSS-533		Yes	BPH3700--BPH3643	iso1	239	present
BPH3702	VSS-535		Yes			239	present
BPH3704	VSS-539		Yes			239	present
BPH3706	VSS-541	P_50	Yes			239	present
BPH3710	VSS-545		Yes			239	present
BPH3733	VSS-137	P_30	No	BPH3336--BPH3733	iso2	5	present
BPH3734	VSS-138	P_31	No			8	absent
BPH3735	VSS-149	P_32	No			239	present
BPH3736	VSS-153	P_33	No			45	present
BPH3737	VSS-157	P_34	No			239	present
BPH3738	VSS-184	P_35	No			1795	absent
BPH3739	VSS-193	P_36	Yes	BPH3523--BPH3739	iso2	239	present
BPH3741	VSS-205	P_38	No			239	present
BPH3742	VSS-205	P_38	No	BPH3742--BPH3748	iso1	239	present
BPH3743	VSS-205	P_38	No			239	present
BPH3744	VSS-205	P_38	No		iso1	239	present
BPH3745	VSS-221	P_39	Yes			239	present
BPH3746	VSS-227	P_40	Yes	BPH3746--BPH3434	iso1	20	absent
BPH3747	VSS-231	P_41	No			22	present
BPH3748	VSS-237	P_42	No	BPH3742--BPH3748	iso2	239	present
BPH3749	VSS-241	P_43	No			22	present
BPH3750	VSS-257	P_44	No	BPH3750--BPH3751	iso1	22	present
BPH3751	VSS-275	P_45	No	BPH3750--BPH3751	iso2	22	present
BPH3752	VSS-339	P_46	No			239	present
BPH3753	VSS-493	P_47	No			239	present
BPH3754	VSS-515	P_48	No			22	present
BPH3755	VSS-525	P_49	No			239	present
BPH3757	VSS-541	P_50	No	BPH3672--BPH3757	iso2	239	present

## Sheet: variables
value	comment
sample_id
episode_id	original ID of the bacteraemia episode
episode_id2	ID of the bacteraemia episode used for the paired isolates analysis in Giulieri, Genome Medicine 2018
baseline_isolate	When more than one isolate were available whether it was the index bacteraemic isolate or sequential isolate
pair_id	Id of genetic pairs with divergent PI uptake (genetic pairs analysis)
iso_class	Pair classification for isolates within the genetic pairs analysis (iso1: high toxicity, reference; iso2: low toxicity, control)
ST	Sequence type
mecA	Presence of the mecA gene
