# Supplementary material for: A high-throughput cytotoxicity screening platform reveals agr-independent mutations in bacteraemia-associated Staphylococcus aureus that promote intracellular persistence
Source: eLife. 2023 Jun 8;12:e84778. doi: 10.7554/eLife.84778 (PMC10259494; doi:10.7554/eLife.84778)
Supplement: Supplementary file 4. — Legend: Variable details. [file elife-84778-supp4.xlsx]

## Sheet: clinical isolates
sample_id	time_of_max_rate_death_mean	max_rate_death_mean	AUC_death_mean	time_of_max_death_mean	max_death_mean	time_of_min_death_mean	min_death_mean	end_point_death_mean	time_of_max_rate_death_sd	max_rate_death_sd	AUC_death_sd	time_of_max_death_sd	max_death_sd	time_of_min_death_sd	min_death_sd	end_point_death_sd
BPH2700	439	0.00318157	152.708	1091	1.54013	130	-0.00595235	1.53953	54.5197	0.000694893	40.9294	31.8434	0.253506	35.7323	0.0323123	0.252681
BPH2701	1104	0.000712006	19.7037	1104	0.329497	195	0.0181867	0.329497	0	0.00067455	15.5904	0	0.24442	34.9342	0.0595129	0.24442
BPH2702	372	0.000807343	23.7609	1104	0.271226	171	-0.0532113	0.271226	10.7331	0.000320226	11.3607	0	0.0926527	14.5739	0.0335457	0.0926527
BPH2703	708	0.00149437	43.9876	1104	0.749295	195	-0.0785594	0.749295	168.898	0.000311278	20.6342	0	0.107728	27.5608	0.0276646	0.107728
BPH2704	496	0.0017048	71.8529	1104	0.821061	160	-0.0398268	0.821061	64.2495	0.00038779	18.9152	0	0.148644	26.7432	0.0192713	0.148644
BPH2705	449	0.00286392	108.265	948	1.10384	155	-0.0785576	1.08106	21.6056	0.00025974	12.0108	48.5963	0.105172	10.3344	0.0127456	0.0906715
BPH2706	553.2	0.00179853	93.7397	1104	1.10243	184.8	0.0611441	1.10243	40.3386	0.000367757	20.9129	0	0.241244	29.8195	0.0529069	0.241244
BPH2707	530	0.00244504	82.2393	904	0.896532	189	-0.0427022	0.83468	22.9783	0.000466168	16.2216	60.7947	0.14013	18.0997	0.00603302	0.0996629
BPH2708	531.6	0.00177935	63.2907	1104	0.79484	192	-0.0436468	0.79484	20.1693	0.000348957	10.1274	0	0.0879046	18.9737	0.0375708	0.0879046
BPH2709	543.6	0.00203415	70.5516	1104	0.857611	196.8	-0.0441296	0.857611	29.2711	0.000387153	10.4639	0	0.0984642	20.5232	0.0300802	0.0984642
BPH2710	920	0.000225126	-3.76137	736	0.0723706	277	-0.0665568	0.0595302	208.94	7.43845e-05	3.00055	570.103	0.0437306	135.627	0.0202428	0.0490713
BPH2711	817	0.000339749	15.9753	1104	0.223111	231	-0.000734288	0.223111	314.423	5.31165e-05	7.96313	0	0.0404536	12.4419	0.0428945	0.0404536
BPH2712	402	0.00135682	84.2578	1091	0.876676	122	0.0264385	0.87637	61.6571	0.000519733	27.7442	31.8434	0.226829	52.3985	0.0183732	0.226658
BPH2713	408	0.00155544	50.8394	854.4	0.492316	157.2	-0.0511989	0.447783	22.0454	0.000548555	17.4688	157.756	0.144626	20.9571	0.0462817	0.117744
BPH2714	380	0.00162179	68.1747	967	0.617652	135	-0.013322	0.603247	21.0143	0.000267167	13.5761	150.523	0.0841581	25.6671	0.0602387	0.0909501
BPH2715	600	0.00149178	61.1855	1104	0.913746	182	-0.0651938	0.913746	100.327	0.000130539	8.38691	0	0.0625249	22.6627	0.0266778	0.0625249
BPH2716	417	0.00234535	121.831	1080	1.2771	123	-0.00713434	1.27362	82.7696	0.000724379	26.7745	58.7878	0.127309	39.9349	0.0453148	0.122886
BPH2717	473	0.00265701	109.458	1096	1.12835	166	-0.00993414	1.12824	34.6583	0.000468812	16.5913	19.5959	0.136014	19.225	0.0341821	0.135922
BPH2718	914	0.00140272	29.9385	1104	0.709123	189	-0.0774251	0.709123	199.527	0.000771011	21.5195	0	0.36758	30.0599	0.0565645	0.36758
BPH2719	516	0.00144091	78.8533	1104	0.954997	165.6	0.0036651	0.954997	123.984	0.000735449	46.039	0	0.478973	36.1497	0.0256627	0.478973
BPH2720	490	0.000409561	17.0959	1104	0.249094	161	-0.0312479	0.249094	263.5	0.000172565	15.9371	0	0.159468	23.2121	0.0413301	0.159468
BPH2721	565	0.00199787	81.7017	1079	0.971038	168	-0.02818	0.969836	80.5357	0.000266936	14.2474	61.2372	0.0184115	17.7989	0.0156171	0.0162539
BPH2722	822	0.000396143	16.1452	1104	0.256819	223.5	-0.00764621	0.256819	84.8528	6.7369e-05	4.52991	0	0.0476938	40.5093	0.0336578	0.0476938
BPH2723	605	0.000268956	6.93276	510	0.13303	184	-0.0331508	0.102846	264.366	0.000177292	14.7821	566.204	0.148516	28.8167	0.0293194	0.169548
BPH2724	311	0.000757093	40.0941	1090	0.314647	134	0.0452144	0.314262	19.1311	0.000358006	18.3379	34.2929	0.124966	26.4726	0.0368543	0.124542
BPH2725	376.8	0.0018797	92.4022	1044	0.812289	118.8	0.0325063	0.810644	31.0032	0.000297444	12.6657	94.4881	0.0834559	17.6975	0.0378415	0.0829507
BPH2726	748.667	0.000874828	14.5154	1060.67	0.375033	249.333	-0.0758472	0.372451	173.061	0.000236106	7.83565	65.2993	0.135453	31.7648	0.0276141	0.138151
BPH2727	707.25	0.000839812	27.5036	1098	0.473264	214.5	-0.0198168	0.473173	353.505	0.000470277	14.4943	16.9706	0.28157	63.2343	0.039864	0.281688
BPH2728	439.333	0.00407691	123.937	808.667	1.25099	155.333	-0.0532773	0.979854	32.28	0.00133748	21.6938	187.176	0.238614	18.8414	0.0424253	0.198633
BPH2729	622.667	0.000637058	13.9679	1028.67	0.251606	186.667	-0.0613843	0.245867	71.1056	0.000146607	6.97559	113.371	0.081696	32.6497	0.0388819	0.0850663
BPH2730	441.333	0.00416583	130.536	744.667	1.27096	156	-0.0218703	0.979759	23.8328	0.00116938	22.6974	95.8332	0.22257	22.4499	0.0505436	0.182554
BPH2731	355	0.000636656	14.993	1091	0.178135	171	-0.0511944	0.177906	19.5038	8.31835e-05	8.84324	31.8434	0.0829108	11.225	0.0271013	0.0832544
BPH2732	316	0.00499997	173.103	596	1.46134	57	-0.0419253	1.06105	51.7069	0.00113348	20.0988	47.95	0.242584	62.8999	0.0254291	0.234201
BPH2733	304	0.00582589	179.608	547	1.56481	58	-0.0772168	0.980718	52.6726	0.000570477	14.3916	67.3944	0.157451	63.5736	0.00917365	0.269764
BPH2734	568	0.000210601	8.3802	1104	0.110247	144	-0.012196	0.110247	358.289	8.81615e-05	9.32322	0	0.0710331	21.7991	0.0297673	0.0710331
BPH2735	636	0.000958104	44.7319	1029	0.538061	147	-0.0382391	0.528084	25.4558	9.67144e-05	4.32002	86.3458	0.06012	17.2858	0.0173256	0.0645652
BPH2736	298	0.00188295	56.6139	603	0.462807	96	-0.0433217	0.38957	12.3935	0.000248764	6.30631	79.3045	0.0530326	42.2564	0.01475	0.025531
BPH2737	287	0.000191712	11.5607	1076	0.108466	139	0.0116028	0.108253	55.0454	3.75824e-05	9.40157	68.5857	0.0753397	55.4365	0.0402647	0.0756103
BPH2738	381	0.00013499	2.24173	552	0.0597942	186	-0.023913	0.0484108	116.576	6.76995e-05	5.36242	604.686	0.046565	24	0.0197562	0.056364
BPH2739	308	0.000538981	16.9349	1014	0.186207	133	-0.0446781	0.179491	12.9615	0.000208957	9.5672	100.543	0.0755904	11.0091	0.028873	0.0702635
BPH2740	341	0.00163508	75.2314	1104	0.828516	130	-0.017597	0.828516	18.363	0.000392877	17.4328	0	0.205247	12.3935	0.0312123	0.205247
BPH2741	482	0.00154682	94.7119	1104	1.10616	98	-0.0132081	1.10616	152.578	0.00072466	47.0675	0	0.440003	51.8459	0.0466837	0.440003
BPH2742	394	0.000490564	16.4162	1069	0.180254	150	-0.0274652	0.178844	174.874	0.000282984	9.20658	61.2372	0.0789353	18.1989	0.0144054	0.0786739
BPH2743	427	0.00247193	117.939	1104	1.13599	77	-0.0306244	1.13599	185.609	0.0013876	57.0364	0	0.373094	66.2088	0.00695276	0.373094
BPH2744	432	0.00279065	99.8564	816	0.974413	130.8	-0.0323646	0.828941	52.4786	0.00110965	15.183	74.6994	0.218584	36.5951	0.0357838	0.0959332
BPH2745	282	0.000881868	53.9161	1104	0.59556	98	0.000875012	0.59556	6.57267	0.000256017	13.901	0	0.131488	23.2895	0.0596928	0.131488
BPH2746	417.6	0.00218243	92.9099	994.8	0.951257	94.8	-0.0441383	0.940311	120.494	0.000596383	11.0105	70.0229	0.191003	49.1854	0.0271216	0.193211
BPH2747	814	0.00139279	44.1285	1104	0.732607	153	-0.0357763	0.732607	29.5567	0.000432521	9.36839	0	0.180201	28.3337	0.0223812	0.180201
BPH2748	804	0.00154135	50.4647	1086	0.768312	157.2	-0.00697706	0.766294	58.6345	0.000533265	12.335	40.2492	0.23164	9.85901	0.0313651	0.233254
BPH2749	426	0.00496452	158.257	712	1.5165	138	-0.0338132	1.11818	30.5941	0.0011727	23.2804	81.6235	0.199165	7.58947	0.0253992	0.0203129
BPH2750	496	0.00236686	103.556	907	0.991862	99	-0.0076174	0.829858	152.861	0.00153925	57.8259	218.269	0.420377	54.5637	0.0467138	0.249287
BPH2751	507	0.00202983	90.6239	967	0.926909	118	-0.0219277	0.814567	119.685	0.00122098	48.9673	192.502	0.391996	34.917	0.0293054	0.292998
BPH2752	397.2	0.00175702	82.4201	894	0.728937	105.6	-0.00326247	0.704852	89.3376	0.000445456	30.5512	25.807	0.205927	69.5327	0.0477395	0.203685
BPH2753	780	0.00288837	106.843	1104	1.73204	106	-0.00381817	1.73204	54.3323	0.000225996	11.664	0	0.0653415	63.3467	0.0527001	0.0653415
BPH2754	340	0.00313547	138.215	1080	1.1691	57	-0.0706886	1.16754	128.05	0.00196767	77.9642	41.7421	0.447807	62.4404	0.0320369	0.446182
BPH2755	333	0.00248515	135.439	1097	1.31098	49	-0.00769381	1.31092	101.025	0.000724557	28.6109	17.1464	0.218643	54.3875	0.0462795	0.218719
BPH2756	497	0.00217297	118.04	1104	1.38572	97	-0.0408386	1.38572	300.873	0.000357047	22.9295	0	0.196071	13.8996	0.0321591	0.196071
BPH2757	357	0.00191987	99.1194	1104	1.20656	104	-0.0305353	1.20656	24.224	0.000579069	21.2578	0	0.236186	35.5303	0.0451003	0.236186
BPH2758	856	0.00106196	41.124	1104	0.633199	164	-0.0263713	0.633199	135.109	0.000255099	8.57305	0	0.0976861	47.95	0.0484051	0.0976861
BPH2759	477	0.00303492	123.754	1039.5	1.3162	126	-0.0670278	1.31341	60.0999	0.000340112	7.37527	31.8904	0.138522	4.89898	0.0143685	0.138155
BPH2760	332	0.0018677	79.6816	956	0.653249	72	-0.00437023	0.63592	100.088	0.00121325	46.8027	240.799	0.266059	73.973	0.0315102	0.240653
BPH2761	463.2	0.000940144	39.2598	1104	0.500815	140.4	-0.0615366	0.500815	141.44	0.000286795	20.0393	0	0.1428	20.1693	0.0254305	0.1428
BPH2762	427.5	0.00145937	91.7797	1104	1.15168	106.5	0.015995	1.15168	23.1733	0.000108499	8.0229	0	0.124245	24.1868	0.0251263	0.124245
BPH2763	338	0.000404718	3.676	977	0.0765279	164	-0.0713971	0.0727886	18.8468	0.000109672	4.25157	72.0417	0.0451255	18.8468	0.0117145	0.0465532
BPH2764	346.286	0.00376521	156.528	804.857	1.38283	66.8571	0.00333048	1.14811	85.115	0.00136679	17.8419	155.94	0.171401	53.2648	0.0964866	0.289561
BPH2765	605	0.000840233	36.7227	1104	0.50429	180	-0.0162895	0.50429	125.881	0.000154093	16.3518	0	0.127531	39.6182	0.0404609	0.127531
BPH2766	595.2	0.00130196	44.2642	1104	0.64665	184.8	-0.0651799	0.64665	115.988	0.000338291	13.3056	0	0.107109	16.0997	0.0204526	0.107109
BPH2767	303	0.00217065	103.714	1022	1.039	86	-0.0588729	1.01863	27.5608	0.00051088	28.6541	90.0133	0.233171	30.7506	0.0352661	0.215976
BPH2768	366	0.00241119	107.274	949.2	0.971553	86.4	-0.0288525	0.944335	30.8869	0.000372082	15.8348	110.341	0.108018	31.9186	0.0319771	0.0922003
BPH2769	509	0.00151446	64.4825	1052	0.71788	143	-0.0253307	0.709209	80.2671	0.000515301	23.0356	83.7138	0.172954	43.0023	0.0377146	0.16106
BPH2770	567	0.00225763	84.8531	1080	1.00894	173	-0.0222649	1.00464	101.025	0.000926815	45.7846	58.7878	0.365931	55.6956	0.0422991	0.359072
BPH2771	557	0.00237189	88.0348	1036	0.990682	164	-0.02932	0.968989	125.995	0.00129581	60.487	105.618	0.458452	34.5022	0.061065	0.428482
BPH2773	492	0.00211708	67.0457	880.8	0.74068	178.8	-0.0600489	0.675993	22.4499	0.000537538	9.32518	76.0605	0.113976	21.7991	0.0350482	0.096876
BPH2774	663	0.000263358	10.0256	1104	0.153117	150	-0.0213537	0.153117	322.368	0.000104862	8.52883	0	0.0849681	50.7701	0.0279384	0.0849681
BPH2775	585.6	0.0015221	66.5227	1104	0.891537	142.8	-0.0773353	0.891537	89.8599	0.000165617	8.88932	0	0.0766019	27.95	0.0376567	0.0766019
BPH2776	460	0.00216123	80.7578	882	0.776359	119	-0.0346865	0.681967	127.26	0.00124386	47.992	182.068	0.323489	44.9667	0.019841	0.210519
BPH2777	311	0.000309309	8.25044	904	0.116708	146	-0.0352258	0.113967	14.4083	0.000112152	7.1361	444.529	0.0629547	42.5394	0.0225853	0.0657187
BPH2778	328	0.000242578	0.432519	719	0.0588965	170	-0.0559502	0.0503525	25.6437	7.21755e-05	5.8213	558.334	0.0291016	15.9499	0.0277714	0.0376075
BPH2779	783	0.000637907	11.1922	1104	0.285489	206	-0.0718557	0.285489	166.223	0.000265859	14.1197	0	0.196317	94.2338	0.0331529	0.196317
BPH2780	938	0.00120448	27.8436	1104	0.600153	192	-0.0430099	0.600153	133.339	0.000504152	21.2913	0	0.327717	56.6675	0.0208509	0.327717
BPH2781	662	0.000996418	37.5484	1104	0.566746	151	-0.0318109	0.566746	227.325	0.000324847	23.1124	0	0.315165	87.6425	0.0453315	0.315165
BPH2782	529	0.00134227	47.8701	998	0.524678	173	-0.0199262	0.507619	101.641	0.000419426	22.8522	117.983	0.162309	34.2403	0.0305196	0.1476
BPH2783	823	0.000642799	19.3273	1104	0.372163	191	-0.0502319	0.372163	44.1588	0.000135239	10.3073	0	0.11731	50.8291	0.0191674	0.11731
BPH2784	395	0.00114618	54.9861	1036	0.580834	126	-0.0134809	0.56307	45.9173	0.00073466	30.6668	105.345	0.276335	25.1714	0.0127018	0.250606
BPH2785	732	0.00171584	68.5014	1104	0.958461	226	0.0391357	0.958461	285.804	9.15022e-05	9.2538	0	0.098424	51.0294	0.021549	0.098424
BPH2786	558	0.00141147	81.3442	1104	0.766799	162	0.0994435	0.766799	338.827	0.000877989	37.5686	0	0.262323	36	0.0313896	0.262323
BPH2787	459.75	0.00240009	105.474	994.5	1.08469	114	-0.0349478	1.0524	142.237	0.000894921	30.9251	118.74	0.267994	78.1647	0.0716783	0.244603
BPH2788	336	0.000748879	34.885	1104	0.34914	184	0.00567698	0.34914	12	8.26587e-05	16.7998	0	0.0989855	12.49	0.0773219	0.0989855
BPH2789	734	0.00117122	58.8526	1104	0.771631	232	0.0598845	0.771631	183.401	0.000499818	31.203	0	0.345815	15.0997	0.105755	0.345815
BPH2790	776	0.00158188	87.2287	1104	1.09399	208	0.120515	1.09399	3.4641	0.000206539	10.5737	0	0.0948515	9.16515	0.0647301	0.0948515
BPH2791	978	0.000433311	40.2831	552	0.410692	255	0.123037	0.365689	127.279	8.33835e-05	6.57466	780.646	0.0334443	46.669	0.0125588	0.097089
BPH2792	420	0.00169203	94.4628	1104	1.01755	168	0.0469076	1.01755	10.3923	0.000293206	15.8312	0	0.118801	0	0.0566409	0.118801
BPH2793	750	0.000889106	50.4882	1104	0.571652	201	0.0471829	0.571652	500.632	0.000516745	19.7063	0	0.243001	29.6985	0.0315407	0.243001
BPH2794	392	0.000914024	53.1643	1104	0.567908	208	0.0578567	0.567908	3.4641	0.00028704	8.27155	0	0.0897679	12.49	0.0491254	0.0897679
BPH2795	488	0.00194763	118.152	1104	1.05196	132	0.1439	1.05196	427.743	0.00075029	74.6385	0	0.234455	135.1	0.118433	0.234455
BPH2796	696	0.000896728	67.3628	1104	0.736493	180	0.0997776	0.736493	313.955	0.000123218	12.4762	0	0.0777729	50.9117	0.0841898	0.0777729
BPH2797	902	0.000736391	38.2549	1104	0.499111	240	0.0450475	0.499111	38.1051	4.35945e-05	7.04259	0	0.0291576	15.8745	0.0559705	0.0291576
BPH2798	1080.86	0.000516362	9.22674	1104	0.236249	230.571	-0.0419171	0.236249	61.2302	0.000297463	19.1081	0	0.17458	123.638	0.0972521	0.17458
BPH2799	737	0.000258068	12.3139	736	0.159734	242	0.0137224	0.145184	344.975	8.75968e-05	7.27634	570.103	0.0557784	119.92	0.0504125	0.0381079
BPH2800	840	0.000776966	22.9148	1104	0.405994	213	-0.023486	0.405994	211.525	0.000378125	16.8647	0	0.210001	40.946	0.0485443	0.210001
BPH2801	345	0.00206139	101.056	804	0.856583	69	0.0248817	0.69809	72.7815	0.000838416	41.6546	203.899	0.255796	90.8248	0.073319	0.172154
BPH2802	341	0.00259444	117.443	660	0.974781	47	0.0649567	0.670034	56.4659	0.000199232	13.0784	88.1816	0.0996045	52.6384	0.0949904	0.135219
BPH2803	307	0.00239335	104.724	716	0.866667	27	-0.0199992	0.697073	11.0091	0.000762183	24.933	38.2623	0.229454	41.8712	0.103648	0.222982
BPH2804	1038	0.000338457	14.6097	0	0.236336	417	0.0413127	0.159683	93.3381	6.12851e-05	5.48266	0	0.0382675	182.434	0.0344359	0.0269801
BPH2805	402	0.00129328	108.093	1104	1.06518	162	0.191147	1.06518	15.8745	0.000249973	6.01865	0	0.0683818	6	0.0745879	0.0683818
BPH2806	369	0.00160812	80.5225	1104	0.777665	171	0.0602636	0.777665	12.7279	0.000214801	10.0485	0	0.216547	4.24264	0.0289433	0.216547
BPH2807	780	0.00159003	56.7695	1090.29	0.858379	198	-0.0215345	0.858097	151.433	0.000239519	15.9366	24.4248	0.228718	36.1663	0.0590344	0.229011
BPH2808	832.667	0.00145132	50.0931	1104	0.805152	198	-0.0186581	0.805152	169.514	0.000483726	12.8019	0	0.205901	45.0999	0.0786496	0.205901
BPH2809	966	0.00119886	52.595	1104	0.770848	232	0.0382287	0.770848	37.47	0.000336798	16.9494	0	0.213709	24.2487	0.0904414	0.213709
BPH2810	420	0.00201418	110.589	1104	1.06384	172	0.10884	1.06384	15.8745	0.000634724	13.1358	0	0.100801	27.0555	0.112841	0.100801
BPH2811	646	0.000984476	41.875	1104	0.564989	268	0.0244088	0.564989	396.651	0.000293199	7.92192	0	0.0849348	79.8999	0.0294342	0.0849348
BPH2812	325	0.00472515	143.222	642	1.32998	110	-0.00808555	0.928654	12.8219	0.000774193	10.8636	227.114	0.250111	15.02	0.055502	0.420814
BPH2813	325.2	0.00455159	143.106	570	1.25082	102	0.0080012	0.815776	14.9399	0.00107982	15.3143	25.4558	0.172732	22.0454	0.0523842	0.137662
BPH2814	319	0.00515438	147.373	538	1.33841	105	0.00240477	0.754436	8.83176	0.00108022	10.6921	32.1248	0.159521	9.09945	0.0458879	0.0231405
BPH2815	331	0.00517416	141.213	546	1.31507	114	-0.027378	0.728491	11.0091	0.000877765	8.81594	28.8998	0.124858	8.48528	0.0297295	0.017932
BPH2816	618	0.0013553	65.8697	1090	0.782745	148	0.0176709	0.782062	63.498	0.000640891	32.7638	34.2929	0.323103	13.5056	0.0376526	0.322371
BPH2817	380	0.00384521	103.868	598	0.997463	157	-0.0179902	0.595559	8.19756	0.000542542	8.09772	30.7506	0.0838	7.01427	0.0335168	0.0581998
BPH2818	416	0.00155	83.9767	1075	0.8408	119	0.0180432	0.839397	110.156	0.000298578	14.1766	55.3064	0.169615	20.5815	0.0340287	0.170917
BPH2819	482	0.00132004	70.9581	876	0.667246	125	0.0145149	0.607934	148.367	0.000392321	15.2016	82.9651	0.129524	16.7212	0.0173145	0.0785782
BPH2820	529	0.00163592	85.9647	896	0.795925	108	0.0131903	0.736522	125.135	0.000494409	21.0402	124.688	0.194593	15.1789	0.0248653	0.169449
BPH2821	482	0.00328038	122.779	854	1.19754	163	0.0096121	1.10127	31.4452	0.000781682	18.2782	52.2609	0.14416	21.2697	0.0381272	0.11189
BPH2822	352	0.00340681	111.391	617	0.98702	123	0.00874431	0.687831	37.502	0.000975507	10.6298	36.677	0.152001	23.3152	0.0282869	0.045532
BPH2823	336	0.000351049	15.3582	1041	0.135153	163	0.000226829	0.134599	28.8998	0.000206416	8.43398	110.227	0.0656329	23.8244	0.0322419	0.0660499
BPH2824	964	0.000776148	29.6689	1104	0.471795	181	0.00389591	0.471795	180.147	0.000262132	15.835	0	0.200847	21.6056	0.0375892	0.200847
BPH2825	971	0.000766749	27.8235	1104	0.449603	188	0.00710777	0.449603	155.65	0.000370033	15.9249	0	0.221353	11.1714	0.0363468	0.221353
BPH2827	663	0.000324048	16.7681	920	0.203817	182	0.015892	0.200607	243.241	0.000196138	7.07196	450.706	0.0806865	38.0736	0.0224792	0.0850144
BPH2828	660	0.000608237	29.8304	1093	0.3431	164	0.0064541	0.342808	52.4443	0.000284591	14.2504	26.9444	0.139619	11.7983	0.0287415	0.139168
BPH2829	424	0.00307023	87.9913	655	0.845451	175	0.00513933	0.571332	9.79796	0.000679582	12.3109	26.4045	0.123799	7.97496	0.0401972	0.0808591
BPH2830	373	0.00222591	90.7797	866	0.789001	140	0.00819754	0.714479	41.4681	0.000940675	34.7	121.293	0.271426	22.9783	0.0115131	0.198296
BPH2831	558	0.00157955	61.1638	961.2	0.678867	176.4	-0.00917186	0.658477	24.3721	0.000247014	7.67498	61.0999	0.0354641	29.577	0.0402764	0.0464051
BPH2832	556	0.00156694	60.038	961	0.661336	169	-0.00833207	0.640325	23.2895	0.000319548	10.1665	66.8581	0.113684	16.7212	0.0246363	0.119014
BPH2833	549	0.00184253	74.7274	950	0.788847	154	0.0150071	0.757499	29.577	0.000248673	10.2634	62.0838	0.0656413	21.6887	0.0365794	0.0740193
BPH2834	559	0.00137338	56.8311	1063	0.637715	183	0.00536496	0.636946	53.0471	0.000171141	8.94353	53.1827	0.0533058	28.3337	0.0388871	0.0526212
BPH2835	371	0.00297204	87.6788	612	0.798217	151	-0.000329534	0.528664	23.8244	0.000835289	21.4507	49.3315	0.189399	17.1464	0.0443201	0.0809951
BPH2836	397	0.00369805	116.998	647	1.08581	142	0.0246014	0.728808	30.692	0.000753895	17.7359	65.8817	0.142177	21.0143	0.0337885	0.154249
BPH2837	387	0.00314518	88.3886	605	0.831973	155	-0.0110245	0.53819	6.29285	0.000236432	10.3843	15.3753	0.0723186	7.97496	0.0365941	0.0604984
BPH2838	438	0.00424302	157.648	778	1.45279	144	0.0206376	1.23489	17.3897	0.00154261	25.0933	56.8788	0.253467	15.1789	0.0439774	0.1764
BPH2839	436	0.00171958	57.7843	696	0.540744	162	0.00851355	0.402716	10.5071	0.00030408	8.79207	37.5659	0.0714695	10.0399	0.029958	0.0440347
BPH2840	344	0.00249131	101.222	711	0.86907	80	0.00106414	0.675638	111.262	0.000561149	7.73494	39.5727	0.103788	65.0292	0.0649564	0.089434
BPH2841	359	0.00255608	99.5804	722	0.879983	86	-0.0385355	0.701337	79.8173	0.000353612	16.2474	41.6845	0.124694	60.7947	0.0197089	0.111452
BPH2842	453	0.000263946	-4.6944	920	0.0372308	218	-0.0842983	0.0366901	70.4585	6.45006e-05	9.12214	450.706	0.057333	49.5742	0.049718	0.0580896
BPH2843	522	0.000204781	2.50369	528	0.0646393	266	-0.0282399	0.0415284	290.985	6.31818e-05	10.4187	580.78	0.0692292	71.5654	0.0590534	0.0570817
BPH2844	508	0.0028366	101.89	960	1.07851	166	-0.0311015	0.977994	67.6343	0.00164416	65.5952	160.504	0.562679	37.3095	0.0659661	0.463938
BPH2845	406	0.00379412	148.389	750	1.35131	118	-0.00670602	1.06797	100.088	0.000643044	29.2597	104.476	0.158806	52.6726	0.055783	0.0322597
BPH2846	438	0.00197675	93.3779	986.4	0.909423	132	-0.00458404	0.850551	112.65	0.000843297	35.3573	163.746	0.220023	45.0999	0.0287676	0.143081
BPH2847	583.5	0.000778338	25.5652	1005	0.341997	199.5	-0.0388798	0.333192	56.3649	0.000206853	7.77826	118.034	0.104754	25.632	0.020361	0.103645
BPH2848	307	0.00412882	156.926	678	1.35005	61	-0.0458106	0.975154	70.9338	0.000913323	27.2861	221.269	0.148706	53.5873	0.0320854	0.182104
BPH2849	462	0.00322766	130.329	850.8	1.26617	99.6	-0.0460624	1.16072	37.7094	0.000614257	16.3983	34.047	0.16317	27.3642	0.0556361	0.131259
BPH2850	449	0.00335369	138.219	815	1.30101	108	-0.0233043	1.14978	29.98	0.000440781	15.6045	34.6583	0.104327	65.0661	0.0615768	0.109625
BPH2851	392	0.000650826	10.1044	884	0.131063	179	-0.0712769	0.119933	19.225	0.000135565	8.34028	163.951	0.0628027	31.3879	0.0300666	0.0650752
BPH2852	455	0.00128706	33.1862	881	0.373714	173	-0.0671664	0.319571	12.8219	0.000570661	20.9195	141.04	0.179932	18.363	0.0474529	0.126341
BPH2853	379	0.00231378	111.673	924	1.03209	112	-0.0076759	0.96871	61.9387	0.00048588	22.7568	134.753	0.102185	44.1995	0.0403658	0.0665264
BPH2854	567	0.00106025	43.9193	1104	0.523933	181	-0.0231392	0.523933	56.6357	0.000240356	12.823	0	0.121002	24.7144	0.0327936	0.121002
BPH2855	454.8	0.00141493	65.1939	939.6	0.630944	138	0.00657435	0.597992	119.655	0.000225322	15.4708	158.268	0.100475	34.9857	0.0400144	0.113504
BPH2856	460	0.000197331	-5.91019	368	0.0208857	207	-0.0683391	-0.019424	315.891	0.000110276	13.749	570.103	0.0777669	34.9342	0.0789455	0.0851191
BPH2857	444	0.00146535	42.8557	867	0.45402	177	-0.0599648	0.386523	10.7331	0.000538533	23.9102	141.006	0.185988	15.5306	0.0514383	0.138916
BPH2858	699	0.00285863	96.7511	1084	1.33327	165	-0.0525962	1.33168	205.153	0.000741558	10.4314	48.9898	0.31098	25.385	0.047885	0.313074
BPH2859	343	0.00419755	131.561	619	1.19328	89	-0.0870759	0.76937	69.7051	0.00112018	35.1106	98.4012	0.269715	74.2078	0.0351721	0.0806819
BPH2860	399	0.00391507	169.441	763.5	1.53248	90	-0.0106366	1.26607	84.0714	0.000465147	13.493	43.3705	0.132458	46.7333	0.0673923	0.209989
BPH2861	386	0.00315798	126.329	793	1.13089	121	-0.0296475	0.962543	105.686	0.000947979	44.7153	171.622	0.235313	82.7406	0.0213228	0.086315
BPH2862	356.4	0.00352345	150.125	768	1.29998	80.4	-0.0242052	1.09562	107.382	0.000722585	31.8069	151.552	0.170788	75.9658	0.041752	0.111265
BPH2863	443	0.0021157	97.1312	975	0.98498	122	-0.0384775	0.95233	100.429	0.000320295	26.6221	143.787	0.0919283	55.857	0.0593498	0.097652
BPH2864	445	0.00220265	98.7871	935	0.985393	141	-0.0213579	0.943445	83.5201	0.000157111	8.52626	131.531	0.114465	50.3071	0.0383187	0.144654
BPH2865	421	0.00251615	82.2275	729	0.785104	165	-0.0304862	0.587655	23.5202	0.00034691	6.95848	31.9186	0.0771272	35.344	0.0506824	0.0377898
BPH2866	492	0.00108486	46.7062	886	0.467274	120	-0.0403599	0.414628	177.178	0.000341416	29.1864	112.74	0.200776	45.8519	0.0289778	0.152674
BPH2867	300	0.000543821	24.3906	962	0.225981	123	-0.00618868	0.2177	29.1479	0.00024936	11.9056	220.802	0.0806475	47.2059	0.0553051	0.0843406
BPH2869	508.8	0.00216457	89.7915	951.6	1.00846	154.8	-0.00189863	0.957919	81.6529	0.000412483	11.9189	139.402	0.155603	23.7739	0.0549259	0.201948
BPH2872	372	0.00326464	154.999	750	1.34656	79	0.00499161	1.13785	29.3939	0.000456851	22.0604	41.3957	0.179345	24.7144	0.0519214	0.16087
BPH2873	361.2	0.0030023	142.914	744	1.24226	64.8	-0.00362176	1.03862	33.7817	0.000531588	23.3378	45.8912	0.200103	46.1649	0.0460099	0.141298
BPH2876	191	0.00347935	190.112	667	1.36493	0	0.0897274	1.11237	114.058	0.000484196	49.3004	51.1116	0.22461	0	0.254233	0.196888
BPH2877	350	0.00361505	169.418	759	1.44397	59	0.0202243	1.22379	34.2929	0.000524924	23.2437	59.1236	0.235096	51.1116	0.0541269	0.242147
BPH2881	280	0.0024043	126.607	751	1.0102	36	0.0491957	0.826374	44.1995	0.000585071	26.6827	106.484	0.247288	41.7421	0.0844461	0.224755
BPH2882	247.5	0.00264057	127.938	640.5	0.968923	9	0.0682089	0.700467	19.8242	0.000161439	11.6844	50.05	0.106677	18	0.0474686	0.0955645
BPH2883	336	0.00231463	136.78	1045.2	1.29374	48	-0.00930091	1.28772	32.311	0.000388893	27.4802	85.107	0.220605	46.669	0.038286	0.220965
BPH2884	313.2	0.00227241	137.542	1054.8	1.30411	42	-0.0121119	1.29562	71.6743	0.000256319	14.8522	110.015	0.221996	48	0.0455877	0.23453
BPH2887	582	0.00413639	186.269	951	2.03255	114	0.0329392	1.88998	221.215	0.000456464	22.5651	212.217	0.507329	37.9473	0.214688	0.689122
BPH2888	382	0.00645428	188.776	633	1.82795	115	-0.0701866	1.18307	35.5303	0.00113229	27.2031	99.95	0.257359	48.8057	0.02093	0.336165
BPH2890	463.2	0.00282509	86.9667	774	0.866599	177.6	-0.0224638	0.698596	43.1416	0.000901457	24.9962	115.879	0.248003	19.2562	0.0301269	0.191384
BPH2891	456	0.00315721	103.772	867.6	1.02703	140.4	-0.01067	0.879105	42.638	0.000344991	3.58684	228.812	0.0960014	82.6608	0.0383404	0.227999
BPH2896	857	0.00231917	47.3867	1104	0.896393	136	0.0066265	0.896393	227.634	0.00303912	28.0296	0	0.667861	25.6437	0.0948673	0.667861
BPH2897	593	0.000420048	8.05963	1104	0.174945	226	-0.0482995	0.174945	19.8696	0.000110968	6.69819	0	0.0554697	46.8871	0.040863	0.0554697
BPH2898	583	0.000586073	10.1425	1104	0.257079	216	-0.0840573	0.257079	34.0294	0.000170959	2.73601	0	0.0495928	35.1909	0.0434671	0.0495928
BPH2902	390	0.000308065	6.9623	1000	0.0980159	155	-0.0402423	0.0955727	31.0612	0.000149913	11.1529	119.86	0.0927057	13.8996	0.0253471	0.0954315
BPH2904	453	0.00228109	96.1677	997.5	1.03533	132	-0.022099	0.939892	22.1811	0.000787214	8.59785	213	0.0910494	10.9545	0.0263644	0.23391
BPH2907	866.4	0.00152425	31.0288	1104	0.68357	166.8	-0.0383762	0.68357	98.0041	0.000572589	19.415	0	0.314137	78.6206	0.0454038	0.314137
BPH2922	940.8	0.00140438	18.8336	1104	0.551153	194.4	-0.0719808	0.551153	226.71	0.00126837	9.79998	0	0.331277	48.1124	0.0472879	0.331277
BPH2923	685	0.000363875	5.14591	920	0.146295	206	-0.0425414	0.143153	208.241	0.000236854	10.1183	450.706	0.107855	55.0781	0.0622363	0.11115
BPH2924	568	0.00317343	122.961	1104	1.66532	168	-0.0452313	1.66532	38.0736	0.000553613	18.5876	0	0.242588	18.1989	0.0794757	0.242588
BPH2925	608	0.00316225	105.66	1104	1.60011	191	-0.0762485	1.60011	18.0665	0.00047283	22.8931	0	0.276653	23.8244	0.0142112	0.276653
BPH2926	743	0.000316903	-0.905302	1104	0.107901	188	-0.0706676	0.107901	39.3294	0.000129035	3.73494	0	0.0474492	73.8431	0.0399752	0.0474492
BPH2934	478	0.00152468	78.8311	956	0.779475	128	-0.00353895	0.724617	89.5321	0.000433896	28.1933	125.437	0.19935	44.5242	0.122302	0.167742
BPH2938	508.8	0.0020181	87.4767	1057.2	0.870613	136.8	0.0400482	0.865641	40.5611	0.000571815	26.8653	68.1997	0.161675	31.8622	0.0997113	0.154923
BPH2942	280	0.00278242	164.999	969	1.44003	0	-0.0614546	1.41522	124.746	0.000148417	7.81624	75.5857	0.129526	0	0.0590617	0.127434
BPH2943	323	0.00289437	161.632	995	1.40088	0	-0.0749842	1.36355	147.625	0.000297794	15.4007	125.308	0.172624	0	0.0489385	0.156595
BPH2946	752	0.00142192	41.3279	1104	0.728298	150	-0.05231	0.728298	19.96	4.66776e-05	5.71516	0	0.0444751	16.0997	0.0473232	0.0444751
BPH2947	784	0.00167466	67.1272	1104	0.992704	113	0.00207109	0.992704	22.6627	0.000598527	27.9632	0	0.373843	23.2121	0.0428542	0.373843
BPH2948	778	0.00119548	43.3662	1104	0.705628	148	-0.0467558	0.705628	31.6733	0.000102534	7.91981	0	0.08344	14.0285	0.048136	0.08344
BPH2949	370.8	0.00182271	102.359	955.2	0.905735	78	0.0182525	0.864885	111.073	0.000659228	34.0318	143.962	0.20762	78.1153	0.0976856	0.177321
BPH2952	319.2	0.00284036	113.383	736.8	0.959463	73.2	-0.0691876	0.816878	97.6176	0.000157852	9.67497	19.6265	0.0462564	47.51	0.0543604	0.0331296
BPH2953	326	0.00302244	122.657	735	1.02677	61	-0.0560311	0.862189	63.4602	0.00015986	11.4681	21.7164	0.0584251	56.4659	0.0689625	0.0531115
BPH2959	583	0.00236424	80.8999	1041	1.01718	155	-0.0760447	0.998276	67.0731	0.00102895	40.692	104.044	0.38258	25.8534	0.0496396	0.370718
BPH2960	598.8	0.00206413	68.5152	1071.6	0.895756	146.4	-0.0465188	0.890971	18.6869	0.000375563	6.81985	72.4486	0.143604	49.2219	0.0875224	0.144835
BPH2961	587	0.0020378	69.0858	1059	0.909704	131	-0.0619639	0.900882	40.5906	0.000432751	19.2131	86.5124	0.166997	19.8696	0.0561938	0.1629
BPH2962	459	0.00204133	106.181	973	1.12052	98	-0.0547853	1.04695	103.975	0.000185513	11.805	144.221	0.201221	19.5959	0.0278396	0.277331
BPH2963	420	0.00195381	106.864	987	1.13858	102	-0.0431658	1.0833	77.1181	0.000168993	12.986	130.56	0.220561	18.5903	0.0336928	0.280939
BPH2964	510	0.00127543	66.2954	1088	0.740682	136	-0.00546005	0.739536	28.3972	0.000187371	8.28331	39.1918	0.0602584	10.5071	0.0738439	0.0585315
BPH2965	488	0.00187913	82.8087	773	0.731933	167	0.0907401	0.611675	28.5657	0.000270492	21.9223	53.4528	0.120708	55.6956	0.161318	0.141829
BPH2966	444	0.00283217	91.9611	805	0.895994	118	-0.0656948	0.792432	55.6417	0.000519999	16.9249	83.4338	0.129378	53.755	0.0569737	0.113073
BPH2973	284	0.00412715	142.069	540	1.15075	35	-0.032157	0.789966	39.7391	0.000616435	22.0662	52.169	0.170834	40.055	0.029127	0.0913454
BPH2974	300	0.00308089	108.94	574.8	0.879579	42	-0.0176325	0.650458	12.7279	0.000517123	17.3508	31.5785	0.140758	30.2985	0.0244022	0.0693916
BPH2975	316	0.00314079	115.373	627	0.931517	32	-0.0295949	0.748949	27.5391	0.000681514	22.2552	65.6993	0.16743	35.5303	0.034542	0.107516
BPH2976	1104	0.00148964	33.6378	1104	0.635441	228	0.0114003	0.635441	0	0.000153421	2.03895	0	0.0154433	42.4264	0.0142503	0.0154433
BPH2977	1104	0.00276313	56.5734	1104	1.09441	222	0.064367	1.09441	0	0.00184247	12.3195	0	0.477625	50.9117	0.0168969	0.477625
BPH2978	822	0.00211862	72.255	1104	1.1764	212	-0.00270135	1.1764	114	0.000315015	8.08916	0	0.0296692	21.0713	0.0520491	0.0296692
BPH2979	838	0.00194802	69.9523	1104	1.205	158	-0.0428463	1.205	43.4051	0.000271566	18.8766	0	0.197069	12.49	0.0545267	0.197069
BPH2980	910	0.0014162	35.412	1104	0.748085	202	-0.0590914	0.748085	28.3549	0.000336412	17.2587	0	0.208906	36.6606	0.0663938	0.208906
BPH2981	892	0.00233845	82.3919	1104	1.40546	158	-0.0234028	1.40546	67.4389	0.000385532	28.7409	0	0.35818	30.7896	0.0194997	0.35818
BPH2982	782	0.00103689	35.1421	1104	0.59757	194	-0.0484395	0.59757	55.7494	0.000188876	10.528	0	0.137038	18.3303	0.0393213	0.137038
BPH2987	297.6	0.00443859	143.164	579.6	1.21104	42	-0.0692887	0.858905	10.0399	0.000637646	13.8849	89.8599	0.111738	26.1534	0.0317762	0.143386
BPH2988	295.2	0.00382071	127.915	548.4	1.06305	13.2	-0.0361467	0.72514	22.2081	0.00088866	23.7528	51.8922	0.190531	20.9571	0.0378716	0.0951625
BPH2989	411	0.00242775	90.2172	845	0.891171	107	-0.0628355	0.758914	84.1499	0.000484241	10.9534	118.151	0.0590825	65.0015	0.0561132	0.107669
BPH2990	489	0.0023368	78.0073	806	0.810973	159	-0.032263	0.645513	31.0032	0.0005716	6.76183	92.0695	0.0779393	13.0077	0.0444214	0.0920134
BPH2991	448	0.00224091	79.7725	803	0.803643	96	-0.0488601	0.655362	30.9839	0.000836916	16.0505	85.6481	0.13966	66.7053	0.0502863	0.0732593
BPH3202	655.2	0.00267139	65.7723	962.4	0.94024	186	-0.0415267	0.88983	45.7734	0.000194313	8.5607	111.17	0.175594	37.229	0.0230457	0.211719
BPH3204	852	0.0036769	110.776	1104	2.0496	87	-0.0647231	2.0496	8.48528	0.000244283	12.4335	0	0.0696989	45.5631	0.0458817	0.0696989
BPH3208	624	0.00218246	83.7341	967	1.00644	117	-0.032693	0.978832	158.609	0.000317253	11.988	160.523	0.200471	45.6552	0.0379434	0.204394
BPH3216	391.5	0.00292964	100.684	672	0.910459	117	-0.00218974	0.661945	13.3041	0.000428875	20.182	14.6969	0.171892	10.3923	0.0433247	0.0929877
BPH3220	605	0.00314868	125.042	999	1.44254	81	-0.0190119	1.37313	155.696	0.0013165	45.2903	86.9276	0.428999	46.2817	0.0509415	0.369599
BPH3225	537	0.000901966	42.6983	1050	0.442372	137	0.01946	0.439039	70.5606	0.000382312	14.4423	93.4922	0.123834	27.7345	0.097113	0.122545
BPH3226	783.6	0.00309809	141.534	1104	2.08969	48	-0.0358536	2.08969	152.417	0.000568335	53.2978	0	0.584471	55.4797	0.0351667	0.584471
BPH3236	790	0.00192932	80.721	1104	1.11076	140	0.0173702	1.11076	193.221	0.00111463	61.5564	0	0.610191	35.5303	0.106913	0.610191
BPH3244	627	0.00438171	119.049	947	1.53096	188	-0.0329845	1.32334	84.4914	0.00107932	29.4326	172.208	0.176744	29.7993	0.0438215	0.209134
BPH3246	321	0.00579317	181.41	584	1.59482	70	-0.0840536	1.03222	25.9461	0.00165576	14.3513	58.1309	0.192534	23.2895	0.0950736	0.0424213
BPH3250	649.2	0.00257299	107.784	1027.2	1.21873	64.8	0.00619938	1.20873	315.226	0.00137282	29.4634	109.276	0.524923	62.2672	0.0822806	0.52768
BPH3252	584.4	0.00236884	141.344	1104	1.63232	90	-0.0231848	1.63232	100.811	0.000319535	17.3333	0	0.187889	20.347	0.0367562	0.187889
BPH3258	750	0.00187545	71.6122	1104	1.04069	159	-0.0224278	1.04069	152.924	0.000882809	47.0406	0	0.481378	20.6978	0.0166528	0.481378
BPH3260	615	0.00258421	100.463	1047	1.23475	106	-0.0139954	1.21771	134.204	0.00108211	51.6548	88.8122	0.531981	37.6935	0.0933402	0.529195
BPH3262	585.6	0.00200382	65.339	1033.2	0.81913	99.6	-0.0991738	0.806998	206.482	0.000590311	26.1523	108.532	0.353128	75.8472	0.0647886	0.35468
BPH3268	453	0.00426586	153.186	853	1.50607	118	-0.0633568	1.22599	110.748	0.00185906	49.3862	200.562	0.334449	13.5056	0.0798444	0.0912381
BPH3270	518.4	0.00377724	110.642	829.2	1.18518	190.8	-0.0386487	0.966961	65.2595	0.00166279	30.2897	120.852	0.284472	13.6821	0.0952204	0.0896242
BPH3272	651	0.00353771	95.8923	993	1.34963	184	-0.0656752	1.27929	82.7696	0.000797714	25.0177	124.114	0.188447	46.1129	0.0341005	0.19458
BPH3274	472.8	0.00172493	67.97	884.4	0.684474	130.8	-0.0512858	0.575849	63.6962	0.00116152	23.0779	152.947	0.249854	21.3822	0.100232	0.130411
BPH3276	529.2	0.000662301	44.621	1093.2	0.402525	129.6	0.0828651	0.402447	339.183	0.000502778	24.342	24.1495	0.265257	19.718	0.0635024	0.265337
BPH3282	302.4	0.00360217	153.199	668.4	1.25599	40.8	-0.0662746	0.893803	150.395	0.00123976	37.9545	179.379	0.233591	56.0286	0.119534	0.0305759
BPH3284	600	0.00338454	115.697	1057.2	1.4439	163.2	-0.0399211	1.43092	65.8635	0.00112243	28.9346	104.648	0.461525	26.6308	0.0726159	0.481681
BPH3292	809	0.0032498	144.432	1104	2.13508	72	0.0126333	2.13508	132.023	0.000467353	51.0542	0	0.542558	67.1357	0.109216	0.542558
BPH3294	311	0.00638424	204.686	560	1.77095	36	-0.0843489	1.11473	49.0999	0.00169743	14.986	77.6453	0.160036	48.7442	0.145018	0.102013
BPH3304	450	0.00342822	134.451	812.4	1.28234	112.8	-0.0218139	1.10534	29.3939	0.000870748	17.7669	70.9422	0.156079	21.7991	0.0525958	0.0539183
BPH3306	743	0.00335273	130.452	1104	1.7922	132	-0.0471728	1.7922	110.662	0.00226347	85.787	0	1.03085	65.2871	0.0347959	1.03085
BPH3316	1077	0.00173765	34.8926	1104	0.831527	150	-0.06794	0.831527	50.5925	0.000882706	30.239	0	0.483909	27.0998	0.0765345	0.483909
BPH3320	794.4	0.00379506	167.891	1104	2.19701	19.2	-0.0806502	2.19701	227.431	0.00190978	126.546	0	0.840662	42.9325	0.0391905	0.840662
BPH3328	683	0.000848629	29.8284	1104	0.413224	184	-0.00523571	0.413224	95.0516	0.000263015	13.4968	0	0.124453	44.5242	0.08474	0.124453
BPH3332	540	0.00225376	76.2644	872	0.845469	50	-0.0973289	0.765757	81.1221	0.000482556	21.8869	125.895	0.0921229	45.1664	0.0815893	0.128901
BPH3336	312	0.00303588	129.443	866.4	0.996828	9.6	-0.0614764	0.957881	131.795	0.000849501	17.8632	275.105	0.0834143	21.4663	0.0355648	0.0936144
BPH3337	379	0.00234767	72.7911	767	0.691367	132	-0.0664846	0.564468	45.1265	0.00044503	8.74294	87.478	0.06305	18.5903	0.0386291	0.0738019
BPH3338	342	0.00631741	186.37	580.5	1.6951	87	-0.112961	1.04916	64.8074	0.000814092	21.4607	51.9326	0.131352	58.4808	0.147054	0.0256638
BPH3340	307.5	0.000907774	41.0674	1051.5	0.413297	106.5	-0.0357055	0.405891	36.7831	8.39579e-05	9.60622	105	0.0745878	15	0.0406624	0.0843939
BPH3346	679	0.00203459	73.8361	980	0.91363	114	-0.0198371	0.855121	204.614	0.00108008	22.9716	192.25	0.164333	18.9737	0.0823704	0.167098
BPH3348	502.8	0.000486209	16.8812	1104	0.22817	201.6	-0.032344	0.22817	112.202	0.000210845	5.26267	0	0.0901075	72.1997	0.0718916	0.0901075
BPH3350	373	0.00117179	51.7684	879	0.491329	131	-0.0276468	0.435877	36.4801	0.000299929	26.2422	131.713	0.164938	46.2299	0.086688	0.137288
BPH3352	424	0.00561071	166.094	709	1.60425	134	-0.0733497	1.15297	111.585	0.00194756	43.8876	155.325	0.325193	56.2423	0.100767	0.107795
BPH3356	936	0.00185513	34.0379	1104	0.790105	261	-0.0155902	0.790105	139.582	0.00102562	19.8138	0	0.420665	164.481	0.0475679	0.420665
BPH3358	406.8	0.00186206	73.6206	888	0.667877	126	-0.0275853	0.626129	28.5867	0.000267884	26.1921	110.227	0.157318	48.1871	0.126465	0.138084
BPH3360	582	0.000599872	42.2075	920	0.446699	162	0.071042	0.439393	202.263	0.000263122	17.1537	450.706	0.15209	42.2564	0.10885	0.16077
BPH3361	483	0.00501386	204.372	890	2.07316	123	0.00478839	1.83269	76.1551	0.0035364	113.849	132.254	1.21698	29.0861	0.0397463	1.13174
BPH3362	516	0.000413705	7.39747	754	0.11259	189	-0.0408152	0.0980151	132.109	0.000155877	10.4216	383.224	0.0795476	155.387	0.0481953	0.0768236
BPH3366	705	0.00160729	67.9992	1104	0.941838	116	-0.0271817	0.941838	76.1551	0.0001788	10.9953	0	0.125376	35.5303	0.0271179	0.125376
BPH3367	428	0.0012655	54.2699	835	0.472451	158	0.0310437	0.442148	22.0182	0.000302601	26.6857	62.4019	0.178154	23.5966	0.10359	0.192772
BPH3368	493	0.00173213	73.193	1104	0.934599	113	-0.0722422	0.934599	93.8318	0.000143027	13.7204	0	0.126564	20.2287	0.0244761	0.126564
BPH3370	414	0.00191476	104.124	991	0.986327	31	0.009175	0.978136	147.605	0.000220825	13.0076	177.357	0.160874	26.1304	0.0795786	0.170241
BPH3372	610	0.000367107	1.55101	1039	0.104374	163	-0.0710335	0.0959346	149.335	0.00013796	6.3903	79.365	0.0780948	123.63	0.0316685	0.0790331
BPH3376	504	0.0011032	40.6405	991	0.474431	95	-0.0104892	0.412968	93.8765	0.00069247	23.4704	126.679	0.243785	54.3875	0.0365997	0.197596
BPH3381	220	0.00507516	146.056	452	1.2599	27	-0.139141	0.629862	84.9094	0.000702621	24.723	65.909	0.154787	42.2137	0.0590042	0.0738928
BPH3382	659	0.00201002	62.7325	1104	0.89777	161	-0.0434667	0.89777	29.2506	0.000163431	18.7111	0	0.175492	105.123	0.0624262	0.175492
BPH3383	278.4	0.000693681	32.9743	1104	0.303456	108	0.0148795	0.303456	44.6184	0.000241764	18.6267	0	0.121922	33.1361	0.0844975	0.121922
BPH3384	351	0.000395644	26.623	1099	0.213264	162	0.0512907	0.213205	35.344	0.000237573	19.2483	12.2474	0.132634	16.0997	0.0597666	0.132621
BPH3389	324	0.00281689	123.168	682.8	1.04427	25.2	-0.0262871	0.750362	63.2139	0.00058842	12.754	71.5486	0.0873595	35.0885	0.0281854	0.0958359
BPH3394	432	0.000348496	12.9498	1104	0.148263	174	-0.0207165	0.148263	113.128	0.000212487	14.5874	0	0.117543	14.0712	0.0376978	0.117543
BPH3396	337	0.000749958	45.8426	1055	0.340214	111	0.0901075	0.338647	90.3925	0.000227989	10.0959	120.025	0.0439014	47.0532	0.0809975	0.0434164
BPH3401	595	0.00179245	62.4793	1104	0.808711	158	-0.0310589	0.808711	39.6938	0.000164777	9.69026	0	0.0721994	90.0133	0.0455829	0.0721994
BPH3403	533	0.00204721	87.3739	1014	0.96508	67	-0.0366233	0.947558	129.1	0.000573866	25.168	126.939	0.101399	36.4801	0.0519627	0.0964528
BPH3412	219	0.00251235	97.3203	750	0.739663	13.5	-0.0290512	0.686618	20.4939	0.00100952	18.9649	408.793	0.095024	27	0.0379235	0.0596487
BPH3413	532	0.0020893	89.5793	1040	1.04514	119	-0.0440451	1.03656	126.92	0.000582991	21.8141	73.1574	0.135215	64.4453	0.0626282	0.131683
BPH3415	632	0.00189345	76.3804	1080	0.926071	113	0.0111497	0.923333	33.2265	0.000311012	12.1927	58.7878	0.137832	98.6205	0.032997	0.140951
BPH3416	633	0.00209913	103.437	1104	1.20033	96	-0.0269251	1.20033	74.8599	0.000155069	8.54338	0	0.110369	38.2623	0.0305089	0.110369
BPH3417	599	0.00194302	73.6873	1104	0.946577	87	-0.0353744	0.946577	37.454	0.000337342	20.5027	0	0.219198	64.3708	0.0555184	0.219198
BPH3423	396	0.00279655	137.593	1062	1.38054	69	-0.0139975	1.37323	158.139	0.000502431	22.2177	84	0.296483	66.1816	0.0194897	0.299958
BPH3425	455	0.00208341	90.75	917	0.904124	115	-0.0054267	0.817786	58.2237	0.000640557	17.1996	156.802	0.130403	36.0832	0.111623	0.149659
BPH3427	284	0.000703403	37.47	846	0.285078	38	0.019913	0.271916	32.5699	0.000303235	16.233	165.147	0.104146	27.0111	0.032028	0.0990249
BPH3431	631.2	0.00172725	62.9351	1104	0.851818	121.2	-0.0183485	0.851818	70.9169	0.000185484	15.2934	0	0.0913427	37.5659	0.0475415	0.0913427
BPH3433	577.5	0.00051192	28.2962	940.5	0.253679	187.5	0.0617267	0.239767	132.306	0.000314302	7.68792	169.803	0.0418812	30.7409	0.0582845	0.0467421
BPH3434	478.8	0.0022332	95.6679	874.8	0.942739	85.2	-0.0135019	0.85882	37.5659	0.00037569	9.00612	39.8898	0.103333	13.6821	0.0450557	0.087291
BPH3435	529	0.000218858	5.47884	984	0.0788851	115	-0.0171911	0.068498	156.342	5.44505e-05	7.12865	112.25	0.0363718	46.6948	0.0464105	0.0285851
BPH3437	497	0.000195302	6.83431	0	0.435367	338	-0.0424518	0.0269524	71.2376	6.80459e-05	8.72508	0	0.135875	28.3125	0.0396111	0.0546776
BPH3439	699.6	0.000771691	31.915	441.6	0.497124	318	-0.00758047	0.434445	123.518	0.000224673	13.5287	604.686	0.105925	72.6223	0.0611543	0.163713
BPH3443	848	0.00137974	41.1552	736	0.72616	327	-0.0322288	0.662755	121.174	0.000536528	26.2509	570.103	0.292525	54.4316	0.0443246	0.319768
BPH3448	442	0.00179057	91.0387	944	0.804005	113	0.0487697	0.76261	67.7407	0.000401592	16.4963	168.841	0.0964944	84.5482	0.118242	0.0694506
BPH3451	676	0.000810331	39.5078	1104	0.494254	165	0.0147894	0.494254	70.7559	0.000377162	13.4117	0	0.233036	13.0077	0.0419189	0.233036
BPH3453	554.4	0.001024	64.6468	1104	0.669045	112.8	0.104156	0.669045	276.703	0.000372079	23.0367	0	0.285952	65.6445	0.144125	0.285952
BPH3457	973	0.00129228	35.5143	736	0.702382	340	-0.0463863	0.629644	203.166	0.000242356	19.9499	570.103	0.154611	88.3991	0.0408023	0.259343
BPH3459	494	0.00139153	76.8279	548	0.659681	202	0.120339	0.545297	239.93	0.000750249	29.1462	458.765	0.172956	71.2629	0.106722	0.14886
BPH3460	267	0.00402264	174.164	661	1.29643	74	0.0945564	1.00158	127.942	0.00221938	80.3141	309.344	0.490416	89.6125	0.0655159	0.263305
BPH3462	408	0.000986987	49.3589	570	0.450869	223.5	0.0623324	0.331505	45.6946	0.000371235	10.1219	385.839	0.109249	52.6213	0.0276365	0.053641
BPH3463	740	0.00184673	82.5457	920	1.06062	272	0.0171638	1.05045	257.502	0.000499865	52.3576	450.706	0.422318	86.7548	0.072384	0.436718
BPH3465	902.4	0.00070729	17.7524	662.4	0.434915	354	-0.0399655	0.319675	132.177	0.000294724	7.84332	604.686	0.0655206	56.6039	0.0346235	0.146951
BPH3469	654	0.00151706	71.4278	1104	0.922128	270	0.019473	0.922128	246.219	0.000282763	23.274	0	0.199206	45.8519	0.0870504	0.199206
BPH3473	960	0.0010216	27.9569	662.4	0.580433	343.2	-0.0358218	0.483888	200.843	0.000157805	16.0653	604.686	0.142673	98.5353	0.0152674	0.222814
BPH3477	488.4	0.00172605	50.3655	480	0.524997	285.6	-0.0333348	0.394254	8.04984	0.000310135	14.3202	439.62	0.0970495	27.3642	0.0375855	0.127943
BPH3479	466	0.0011281	53.4883	1009	0.493641	233	0.0243568	0.483744	39.1918	0.000336037	11.8624	116.802	0.0829251	27.2103	0.0400769	0.0690323
BPH3481	612	0.000439924	32.0636	256.5	0.486534	306	0.0285615	0.278107	142.576	7.80601e-05	9.78515	513	0.279795	55.2087	0.0354172	0.0315672
BPH3482	617	0.000180317	7.68919	0	0.339449	328	-0.0281505	0.0655145	278.943	5.7554e-05	9.57983	0	0.0576498	57.7581	0.0446868	0.0895013
BPH3485	984	0.000464951	9.86554	0	0.425825	385.2	-0.0509386	0.172591	117.881	0.000175066	3.70215	0	0.136527	64.5384	0.0240103	0.102199
BPH3489	817	0.000302034	8.12341	0	0.464479	362	-0.0641387	0.0922626	231.18	0.000277274	8.20682	0	0.216429	45.9565	0.0391685	0.0925776
BPH3493	872	0.00107525	38.3925	920	0.634456	335	0.00202496	0.581953	162.229	0.000446445	17.4178	450.706	0.209587	55.3064	0.0268187	0.279464
BPH3499	768	0.000578939	20.7853	184	0.537825	330	-0.0445857	0.296069	242.091	0.000615633	29.6113	450.706	0.271168	81.4764	0.11194	0.390649
BPH3501	650.4	0.000499444	18.096	0	0.413073	328.8	-0.0384094	0.202235	29.8798	0.000121436	8.67077	0	0.156513	29.8195	0.0132618	0.0903348
BPH3508	600	0.000607684	27.107	276	0.415394	298.5	-0.0109185	0.294231	51.1468	0.000330984	17.9049	552	0.0541919	41.6773	0.0637567	0.181984
BPH3511	856.8	0.00116414	35.1988	662.4	0.675952	313.2	-0.048894	0.571197	234.169	0.000755167	26.7644	604.686	0.259404	35.344	0.0273987	0.396699
BPH3523	661.2	0.00131158	54.8671	883.2	0.727193	283.2	-0.00775841	0.709774	148.759	0.000249494	23.4661	493.724	0.125618	56.5084	0.072134	0.136402
BPH3524	351	0.00276098	89.71	414	0.738374	181.5	0.0599253	0.506955	24.7386	0.00121739	33.9602	276.521	0.308173	38.0657	0.0651911	0.172264
BPH3527	879	0.00105969	35.2921	736	0.639553	330	-0.0243689	0.550293	128.728	0.000308309	25.0512	570.103	0.156813	33.0817	0.0842364	0.270398
BPH3529	613	0.00164038	3.87905	911	0.32705	214	-0.0494391	0.317099	334.032	0.00356698	15.3115	446.819	0.648888	145.575	0.0552905	0.653401
BPH3535	840	0.00139167	44.3018	1104	0.723102	173	-0.0128737	0.723102	133.086	0.000234887	17.8591	0	0.187518	40.055	0.0440344	0.187518
BPH3545	1096	0.0021699	37.3942	1104	0.832803	217	0.0264891	0.832803	19.5959	0.000979491	22.3158	0	0.40846	85.9837	0.112405	0.40846
BPH3547	524.4	0.00417268	102.754	805.2	1.19073	212.4	-0.0909701	0.91902	34.0999	0.00129172	27.7693	85.4237	0.262994	64.5662	0.0578074	0.149194
BPH3548	417	0.0054	129.685	604	1.35745	188	-0.00502249	0.74837	30.0599	0.000625306	30.8931	46.4241	0.222706	34.2929	0.0605203	0.315244
BPH3568	723	0.00186851	51.6502	1104	0.860327	227	-0.0158804	0.860327	37.518	0.000592196	23.5902	0	0.237489	84.2923	0.0861319	0.237489
BPH3584	478	0.00151676	38.4955	724	0.398071	201	-0.0229945	0.293476	13.5056	0.00074651	17.2186	14.0285	0.151089	74.7235	0.102664	0.10495
BPH3588	478	0.00147332	44.6816	886	0.44537	224	-0.00131521	0.397003	19.96	0.000580869	19.9383	147.54	0.166653	68.8999	0.0744903	0.132805
BPH3590	854.4	0.000318167	5.42011	883.2	0.125779	316.8	-0.0202851	0.117742	295.971	0.000135868	24.8731	493.724	0.107496	293.583	0.150285	0.0920575
BPH3596	350.4	0.00689638	163.473	532.8	1.68512	112.8	-0.0470278	0.780632	28.3337	0.00100685	10.7276	36.8402	0.120307	42.9325	0.098754	0.158037
BPH3602	1002	0.0014697	4.98332	1104	0.532697	267	-0.142852	0.532697	155.815	0.000731742	12.1057	0	0.272549	152.44	0.0655748	0.272549
BPH3612	565	0.000339278	-2.67504	736	0.0556081	264	-0.0817586	0.0451043	323.186	0.000100756	7.4847	570.103	0.0445253	199.395	0.0550317	0.0337022
BPH3628	350	0.00731618	178.612	530	1.79416	111	-0.0285339	0.865387	40.635	0.00108924	36.7419	44.1995	0.285184	63.6962	0.0801131	0.275201
BPH3632	899	0.00138584	32.1045	1104	0.663707	211	-0.0684501	0.663707	259.805	0.000248898	25.7285	0	0.231337	62.5172	0.0762064	0.231337
BPH3634	705	0.00267195	70.3147	1027	1.076	212	-0.0315873	1.03944	65.8088	0.00129051	27.4143	87.3957	0.226824	111.585	0.0699531	0.173442
BPH3636	842.4	0.00326998	76.2385	1087.2	1.32005	180	0.00102532	1.31493	133.059	0.00172546	36.6088	37.5659	0.583892	155.48	0.0437479	0.578482
BPH3638	694	0.0039308	87.2459	1003	1.30186	272	-0.0318213	1.15058	58.7469	0.00246193	51.6358	110.922	0.552331	150.296	0.107536	0.400771
BPH3640	738	0.000183881	9.31589	368	0.110942	489	0.015305	0.0857654	339.22	8.47706e-05	15.193	570.103	0.0667169	316.485	0.0912935	0.0579784
BPH3643	657	0.000283065	8.57739	1104	0.115823	231	-0.013505	0.115823	265	6.28047e-05	15.2004	0	0.0767209	127.435	0.070319	0.0767209
BPH3648	528	0.000962396	17.6388	970.5	0.270541	315	-0.0714931	0.252904	42.7083	0.000702621	16.3759	57.2101	0.20856	24.2487	0.0363067	0.191819
BPH3650	855	0.00254681	66.8369	1104	1.11956	241	0.0171007	1.11956	194.561	0.00109988	28.4899	0	0.351631	124.327	0.0800913	0.351631
BPH3652	738	0.00034931	-10.7338	898	0.0334024	290	-0.115251	0.031338	304.857	0.000141864	20.2848	443.086	0.134991	193.668	0.108465	0.136343
BPH3658	795	0.00242038	51.6954	1057	0.868958	302	-0.0386594	0.843603	154.178	0.00168132	40.2796	62.7471	0.480616	121.767	0.0591045	0.453344
BPH3660	545	0.000367152	11.722	920	0.167259	272	-0.0151164	0.163705	69.2907	0.000152997	25.4077	450.706	0.175511	112.932	0.124422	0.176042
BPH3662	730.5	0.00051653	22.1649	828	0.29924	382.5	0.0116862	0.27503	365.307	0.000329138	18.3347	552	0.0678555	416.395	0.145234	0.0707688
BPH3664	1009	0.00232341	43.9322	1104	1.05057	171	-0.052708	1.05057	120.265	0.0002824	29.5222	0	0.308574	110.096	0.0766475	0.308574
BPH3666	838	0.00263824	52.7487	1080	0.94269	278	-0.0778948	0.926408	207.106	0.00141791	44.9553	58.7878	0.452967	80.5581	0.0852598	0.431029
BPH3668	806	0.00186709	43.8999	1072	0.715542	236	-0.022757	0.708587	116.447	0.00114302	34.3047	50.8645	0.330785	134.896	0.0829213	0.322767
BPH3670	831.6	0.00412415	102.79	1104	1.72763	241.2	0.0198494	1.72763	135.007	0.00191917	40.5721	0	0.574306	127.166	0.0994375	0.574306
BPH3672	522	0.00169198	82.8417	943.5	0.812096	190.5	0.113442	0.780006	172.719	0.000558098	20.4098	146.509	0.07617	36.7831	0.182358	0.111507
BPH3674	946.8	0.000586327	32.0225	662.4	0.401335	348	0.099983	0.341234	228.883	0.000368463	25.6516	604.686	0.0973486	139.556	0.138413	0.175718
BPH3682	355	0.00266381	101.396	694	0.87002	84	0.0164048	0.614847	127.303	0.000538117	16.632	154.687	0.175685	95.02	0.0864102	0.16955
BPH3684	541	1.14183e-05	9.4737	21	0.210365	1090	-0.00457002	-0.00424181	470.783	7.29461e-05	9.79009	51.4393	0.16657	28.8167	0.04385	0.0444802
BPH3686	352	0.000815901	41.9965	536	0.345381	316	0.077887	0.237179	93.0806	0.00101178	35.6819	433.99	0.304031	389.523	0.117176	0.196821
BPH3688	492	1.86002e-05	8.93554	114	0.213955	1091	-0.0228571	-0.0225547	201.157	0.000126487	19.6585	279.242	0.234892	22.2621	0.0672722	0.0674877
BPH3692	643	0.00179427	75.4292	1016	0.835421	209	0.082085	0.794846	42.4971	0.00106381	19.5506	101.161	0.216235	63.2044	0.150937	0.17993
BPH3694	566.4	0.00265808	99.9263	840	1.02278	157.2	0.0695425	0.82671	135.672	0.000702729	27.6805	174	0.192405	93.3767	0.0823658	0.230838
BPH3696	584	0.0010062	49.4076	659	0.525161	319	0.0496052	0.46463	281.544	0.000630271	36.564	514.161	0.256851	386.978	0.127619	0.326872
BPH3700	568	0.00174859	72.5127	931	0.731393	189	0.0329972	0.652374	146.315	0.00060387	25.9658	163.677	0.148015	131.604	0.119115	0.0787477
BPH3702	698	0.00156181	57.0531	1019	0.668191	245	0.0582425	0.634667	67.8469	0.000459044	16.0952	107.894	0.0484813	58.3472	0.114609	0.0783897
BPH3704	619.5	0.00137937	53.9329	1045.5	0.630513	213	0.0329193	0.620294	184.957	0.000375962	18.5258	69.6922	0.0502514	65.4523	0.126482	0.0633225
BPH3706	463.2	0.00107583	47.5935	1028.4	0.570217	128.4	0.00873372	0.546118	141.948	0.000255678	9.34689	104.062	0.0994103	36.1497	0.0432392	0.115678
BPH3710	671	8.32219e-05	18.5307	139	0.223171	545	0.0668247	0.083722	363.036	6.54188e-05	25.662	340.479	0.23536	363.452	0.119928	0.124897
BPH3733	483	0.000555924	13.612	1104	0.238623	202	-0.0461798	0.238623	25.385	0.000342085	9.06875	0	0.157747	47.0404	0.0387477	0.157747
BPH3734	370	0.00249159	76.434	761	0.727181	125	-0.0778381	0.582378	44.8464	0.000734518	15.9356	74.6914	0.170339	20.2287	0.0379255	0.0998425
BPH3735	524	0.000462382	22.7074	1052	0.244631	169	0.00521087	0.241152	127.486	0.000205949	8.06406	89.0483	0.0692405	38.5902	0.0839494	0.0676658
BPH3736	413	0.00613484	180.018	704	1.75689	139	-0.0989976	1.23519	70.8322	0.00165603	34.689	118.592	0.264552	19.5038	0.0624074	0.0968607
BPH3737	750	0.00344544	78.8063	1057	1.20393	112	-0.0586436	1.11189	161.889	0.00315591	77.8903	115.126	0.796858	37.884	0.0514556	0.629653
BPH3738	237.6	0.00439086	139.098	471.6	1.17912	12	-0.0629873	0.629629	71.95	0.000609864	10.8022	55.7387	0.120524	26.8328	0.0528426	0.0599954
BPH3739	421	0.000181766	-0.911864	736	0.0489829	323	-0.0536312	0.0337913	126.622	0.000130093	7.17355	570.103	0.0491205	397.387	0.0368483	0.0654928
BPH3741	634	0.00176396	63.5609	1104	0.871526	103	-0.0293863	0.871526	78.2918	0.0001179	12.5586	0	0.04801	24.4213	0.0599081	0.04801
BPH3742	495.6	0.00215983	94.4542	1036.8	0.99415	79.2	-0.0236691	0.978975	84.0643	0.000245461	14.4912	150.264	0.139777	45.3784	0.0281817	0.153847
BPH3743	642	0.00157637	56.7835	1104	0.777654	164.4	-0.00755034	0.777654	68.1469	0.000212688	9.23813	0	0.0760233	110.683	0.0820627	0.0760233
BPH3744	484	0.0019404	85.3227	1052	0.86944	73	-0.0226088	0.857904	107.242	0.000268416	19.931	127.373	0.0796653	56.9737	0.0349753	0.0785157
BPH3745	517	0.00184371	82.7545	1104	0.876337	109	0.0131479	0.876337	87.3132	0.000253473	13.8117	0	0.0723577	98.4744	0.0716846	0.0723577
BPH3746	439	0.00298753	125.021	800	1.17343	76	-0.0230004	0.987227	45.1265	0.000231545	19.4078	32.5699	0.107213	23.5966	0.0371443	0.0540016
BPH3747	273	0.00102456	45.195	651	0.344818	29	0.00987914	0.276217	18.8786	0.000344974	14.6928	75.5857	0.1008	29.2506	0.0318243	0.0803962
BPH3748	377	0.000130952	1.99083	923	0.0501957	236	-0.0207238	0.0484383	226.492	6.44472e-05	7.22707	362.4	0.0591326	232.493	0.0388503	0.0599453
BPH3749	494	0.000202621	9.07881	0	0.429115	342	-0.0287181	0.0439077	61.9677	8.05457e-05	5.46931	0	0.138994	34.1526	0.0196113	0.0288287
BPH3750	530	0.00381518	145.581	951	1.43558	228	0.0397054	1.28636	77.6453	0.00186606	84.7546	173.803	0.685676	51.3342	0.0921246	0.552242
BPH3751	667	0.000733235	32.1257	528	0.473319	298	0.00120411	0.35008	47.3075	0.000326353	12.9363	580.78	0.157692	40.279	0.0248199	0.112944
BPH3752	488	0.00139071	58.2271	1104	0.82364	145	-0.0375658	0.82364	167.212	0.000219297	15.1559	0	0.128854	27.2103	0.0434122	0.128854
BPH3753	673.2	0.000901545	37.4039	517.2	0.414269	304.8	0.0400836	0.258769	335.018	0.00108367	42.6352	496.849	0.283237	239.715	0.154289	0.240653
BPH3754	610.8	0.000918667	48.403	774	0.483625	188.4	0.090923	0.441684	164.503	0.000525639	24.5817	441.846	0.178589	78.872	0.135619	0.197459
BPH3755	429	0.00165802	69.8227	1054.5	0.735171	168	-0.00795272	0.718241	120.946	0.000506012	15.9468	99	0.154549	25.4558	0.0536579	0.121184
BPH3757	655	0.000129866	-4.52466	693	0.0150251	311	-0.0534553	0.00260104	235.47	7.97046e-05	9.84206	546.016	0.0632568	132.241	0.0412155	0.0768995
JE2	429.189	0.00301948	106.344	749.514	1.00335	124.216	-0.00581951	0.767089	81.9083	0.000654235	15.5309	107.231	0.11861	87.4047	0.055721	0.138354
TOX-4	636.789	0.000211463	6.79968	576.158	0.125517	296.684	-0.0151226	0.0818988	268.822	0.000182059	17.0247	543.839	0.140178	256.402	0.077013	0.11786

## Sheet: Nebraska transposon mutants
sample_id	unique_gene_symbol	neb_locus_tag	time_of_max_rate_death_mean	max_rate_death_mean	AUC_death_mean	time_of_max_death_mean	max_death_mean	time_of_min_death_mean	min_death_mean	end_point_death_mean	time_of_max_rate_death_sd	max_rate_death_sd	AUC_death_sd	time_of_max_death_sd	max_death_sd	time_of_min_death_sd	min_death_sd	end_point_death_sd
JE2			322.5	0.00276782	174.948	669.375	1.00167	30.625	-0.00266411	0.435474	113.986	0.000634445	13.6035	70.4799	0.134674	53.1465	0.0283331	0.0270428
NE1	ebh	SAUSA300_1327	336.111	0.00224121	157.626	686.111	0.874892	20	0.0171847	0.413018	44.2844	0.000716532	21.6278	81.6156	0.163658	39.2906	0.0677145	0.0635332
NE46	SAUSA300_1930	SAUSA300_1930	327.778	0.00276786	184.399	637.222	1.04279	34.4444	0.0451928	0.426322	51.6667	0.000559287	17.4585	75.9157	0.108391	56.0939	0.0592256	0.0582554
NE66	secA2	SAUSA300_2584	293.889	0.00287367	182.583	614.444	1.03655	36.1111	0.00539691	0.392611	100.367	0.000509225	23.237	120.22	0.108696	58.1903	0.0362134	0.0321722
NE117	cydA	SAUSA300_0986	303.333	0.0018602	144.329	691.111	0.782389	13.3333	0.00447242	0.36087	108.513	0.0005105	21.491	109.023	0.131443	40	0.0435643	0.0547645
NE119	ausA	SAUSA300_0181	265.556	0.00142584	68.3437	485	0.444187	483.333	0.0129523	0.0900685	48.7625	0.000379022	25.1385	32.8824	0.108111	702.78	0.0517541	0.0890805
NE172	glcA	SAUSA300_0191	297.222	0.00264069	171.616	614.444	0.966099	24.4444	0.0466291	0.404435	122.707	0.000639675	14.0116	75.0185	0.101202	48.7625	0.0941885	0.0847325
NE186	fnbA	SAUSA300_2441	365.556	0.00339017	179.945	635.556	1.11062	67.2222	0.00425228	0.409221	46.9338	0.000397126	18.3883	73.4611	0.0978774	53.0984	0.0490395	0.0299472
NE188	mfd	SAUSA300_0481	432.778	0.00166206	146.186	838.333	0.818667	32.7778	0.0102787	0.472091	132.361	0.000474542	19.7608	88.3176	0.0952903	50.1941	0.0456933	0.0212325
NE214	sbnF	SAUSA300_0123	313.889	0.00263081	177.866	678.333	1.02087	17.7778	0.00857885	0.424359	44.915	0.000717171	25.3187	142.675	0.136213	40.5518	0.11061	0.100306
NE362	tarL'	SAUSA300_0247	269.444	0.00236444	161.959	654.444	0.888328	20	0.0226122	0.378038	122.715	0.000814706	31.1246	143.406	0.189972	40.3887	0.051582	0.0370943
NE369	guaC	SAUSA300_1235	292.778	0.00260211	183.443	673.889	1.00357	19.4444	0.00511696	0.466414	124.477	0.000489156	21.6057	104.546	0.119084	40.1905	0.0579857	0.0647686
NE440	opp-3A	SAUSA300_0891	288.333	0.00277701	174.703	616.111	0.997256	24.4444	-0.0313443	0.374443	72.6722	0.000483036	21.3282	98.9879	0.0972863	48.7625	0.0659832	0.0401366
NE472	fmtB	SAUSA300_2109	318.889	0.00270985	173.883	671.667	0.9866	27.2222	-0.0351379	0.455595	73.1342	0.000615893	22.1339	95.1972	0.142503	46.0374	0.0303645	0.0903161
NE573	ribA	SAUSA300_1713	353.75	0.00269237	174.328	662.5	1.00819	39.375	0.0473997	0.409249	40.7738	0.00051449	17.2094	81.8099	0.114917	56.1527	0.0635041	0.0482382
NE581	purF	SAUSA300_0972	370	0.00278307	159.941	698.333	0.920773	74.4444	-0.0163703	0.476275	34.7311	0.000822827	25.6787	81.8153	0.155667	53.3529	0.0825707	0.0491125
NE704	araB	SAUSA300_0537	299.444	0.00196751	166.591	680.556	0.861266	10	0.0816678	0.454635	85.6024	0.000458531	19.8703	85.1632	0.118327	30	0.0614848	0.073131
NE743	SAUSA300_0180	SAUSA300_0180	308.889	0.00241291	176.417	672.778	0.9446	27.7778	0.0471919	0.462607	68.2723	0.000622897	13.824	83.4832	0.115321	48.6769	0.0823444	0.0554443
NE873	agrC	SAUSA300_1991	396.667	0.00047217	32.7473	735.556	0.195723	385	0.0081778	0.055122	107.964	0.000119343	8.41089	24.5515	0.030041	588.117	0.0345521	0.0527845
NE1020	isdD	SAUSA300_1031	238.889	0.00228819	174.013	605.556	0.911899	0	0.0238204	0.384058	74.2369	0.000490693	20.2564	69.257	0.121028	0	0.0331135	0.030478
NE1140	lysA	SAUSA300_1293	329.444	0.00186172	131.838	691.667	0.702398	25	0.000197367	0.336368	80.8333	0.000291823	23.7302	63.6396	0.124608	42.2788	0.0189718	0.0554696
NE1166	ilvB	SAUSA300_2007	353.571	0.00183854	165.413	760	0.864531	10	0.0611698	0.505272	53.6745	0.000144106	20.6669	77.6745	0.0860419	26.4575	0.0427716	0.122524
NE1183	arlS	SAUSA300_1307	301.667	0.00221108	175.484	650	0.908991	22.7778	0.119029	0.460986	121.192	0.000592723	17.0142	140.334	0.12237	47.2435	0.0663513	0.0591526
NE1380	thiW	SAUSA300_0978	335.556	0.00264769	167.257	653.333	0.95426	31.1111	0.0275684	0.416295	63.1192	0.000984074	23.077	89.0576	0.212455	62.1881	0.100607	0.0588882
NE1462	mutS2	SAUSA300_1043	322.778	0.00287337	179.772	631.667	1.03713	21.6667	0.00872756	0.415193	37.006	0.000735107	19.9448	63.5413	0.164717	37.1652	0.0628938	0.0477828
NE1532	agrA	SAUSA300_1992	410.556	0.00043179	27.3107	740	0.169766	397.778	-0.0102326	0.0469144	86.1846	0.000109228	6.51628	13.6931	0.0301469	579.979	0.0199154	0.0506519
NE1553	hutG	SAUSA300_2281	306.111	0.00239855	164.574	652.222	0.913953	11.1111	0.00454291	0.387112	74.5309	0.0005464	21.386	96.148	0.118177	33.3333	0.0675189	0.0475208
NE1561	ebpS	SAUSA300_1370	312.778	0.00246046	167.886	662.222	0.927488	13.8889	0.00444152	0.412832	48.0307	0.00041579	16.1522	67.1338	0.109289	31.9939	0.0490619	0.0338099
NE1671	rsmC	SAUSA300_0526	341.111	0.0025044	166.788	662.222	0.950529	35.5556	0.0180894	0.389827	61.6836	0.000718332	28.8379	103.353	0.168661	50.4631	0.0789971	0.0538873
NE1919	stp1	SAUSA300_1112	300.556	0.00201957	158.313	679.444	0.840119	10	0.00889854	0.419893	84.8692	0.000554388	23.4792	101.318	0.125401	30	0.0546282	0.0764271

## Sheet: allelic exchange mutants
sample_id	mutation	time_of_max_rate_death_mean	max_rate_death_mean	AUC_death_mean	time_of_max_death_mean	max_death_mean	time_of_min_death_mean	min_death_mean	end_point_death_mean	time_of_max_rate_death_sd	max_rate_death_sd	AUC_death_sd	time_of_max_death_sd	max_death_sd	time_of_min_death_sd	min_death_sd	end_point_death_sd
JE2		310.238	0.00321693	162.32	574.524	1.00198	46.4286	-0.00321604	0.430674	84.0309	0.000447544	14.5752	36.3285	0.0963891	44.9484	0.0416269	0.0566196
BPH3370	wildtype	538.81	0.000929877	91.5257	1300.48	0.663175	145.952	0.0158226	0.653603	165.438	0.000230235	25.4643	132.909	0.156913	71.722	0.062629	0.157092
TOX-4		696	0.000115566	8.77253	702.8	0.074178	346.6	-0.00170491	0.0597038	309.849	6.56662e-05	13.2506	651.102	0.0515635	279.19	0.0499105	0.0616251
BPH3370-C4	BPH3370::agrA E7K	566.667	0.000436516	27.7617	966.667	0.18231	213.333	0.00624782	0.121722	73.355	0.000207832	20.3566	158.358	0.0846911	71.8298	0.0853953	0.101777
BPH3370-A4	BPH3370::agrA E7K	597.667	0.000523703	35.6619	966.333	0.232245	279	0.00340927	0.155162	127.558	0.000416118	33.7877	170.707	0.166693	311.432	0.0943201	0.164315
BPH3370-E2	BPH3370::agrC G310fs	513.333	0.000711193	40.4535	1030	0.281044	227	-0.0196375	0.217449	90.4684	0.000340153	19.3806	174.028	0.097089	55.5106	0.0849381	0.112658
BPH3370-F3	BPH3370::ausA K2308fs	418.333	0.000858237	34.6397	805.667	0.244462	244	-0.0273213	0.12247	61.6345	0.000525494	20.9191	238.327	0.119173	313.837	0.0721749	0.0998556
BPH3370-G3	BPH3370::lysA K354fs	661	0.000903426	91.3345	1355.33	0.705068	159.333	0.0212795	0.704908	339.775	0.000334371	31.6404	18.0739	0.195513	48.2873	0.065499	0.195266
BPH3370-D4	BPH3370::cydA C390R	540.333	0.000990191	81.9242	1360	0.660982	160.333	-0.0268363	0.660982	121.471	0.000202476	14.2176	0	0.0966571	44.6201	0.073418	0.0966571
BPH3370-D3	BPH3370::mfd P675S	654.333	0.00108675	101.269	1246.67	0.717099	165	0.00677301	0.70092	156.831	0.000374029	30.283	128.67	0.155816	44.0779	0.0625027	0.139575

## Sheet: variables
variable	comment
sample_id
unique_gene_symbol	Unique gene abbreviation based on the "pan gene symbol" in aureowiki (if pan gene symbol missing FPR3757 locus tag)
neb_locus_tag	FPR3757 locus tag
mutation	Mutation reconstructed by allelic exchange in BPH3370 background (based on the convergent evolution analysis of the genetic pairs)
time_of_max_rate_death_mean	Time to maximum rate in PI uptake (mean)
max_rate_death_mean	Maximum rate in PI uptake (mean)
AUC_death_mean	Area under the curve (mean)
time_of_max_death_mean	Time to peak PI uptake (mean)
max_death_mean	Peak PI uptake (mean)
time_of_min_death_mean	Time of trough (mean)
min_death_mean	Trough (mean)
end_point_death_mean	Final PI uptake (mean)
time_of_max_rate_death_sd	Time to maximum rate in PI uptake (standard deviation)
max_rate_death_sd	Maximum rate in PI uptake (standard deviation)
AUC_death_sd	Area under the curve (standard deviation)
time_of_max_death_sd	Time to peak PI uptake (standard deviation)
max_death_sd	Peak PI uptake (standard deviation)
time_of_min_death_sd	Time of trough (standard deviation)
min_death_sd	Trough (standard deviation)
end_point_death_sd	Final PI uptake (standard deviation)
