# Supplementary material for: A high-throughput cytotoxicity screening platform reveals agr-independent mutations in bacteraemia-associated Staphylococcus aureus that promote intracellular persistence
Source: eLife. 2023 Jun 8;12:e84778. doi: 10.7554/eLife.84778 (PMC10259494; doi:10.7554/eLife.84778)
Supplement: Supplementary file 5. [file elife-84778-supp5.xlsx]

## Sheet: phenotype
GWAS outcome (untransformed and transformed mean PI uptake AUC)
sample_id	pi_auc	pi_auc_transformed
BPH2700	152.708	1.51826
BPH2701	19.7037	-1.13062
BPH2702	23.7609	-1.01637
BPH2703	43.9876	-0.511347
BPH2704	71.8529	0.0842396
BPH2705	108.265	0.768658
BPH2706	93.7397	0.505144
BPH2707	82.2393	0.288018
BPH2708	63.2907	-0.0902309
BPH2709	70.5516	0.0581281
BPH2710	-3.76137	-2.23244
BPH2711	15.9753	-1.24157
BPH2712	84.2578	0.326733
BPH2713	50.8394	-0.356738
BPH2714	68.1747	0.010069
BPH2715	61.1855	-0.134147
BPH2716	121.831	1.00562
BPH2717	109.458	0.789825
BPH2718	29.9385	-0.852396
BPH2719	78.8533	0.22245
BPH2720	17.0959	-1.20753
BPH2721	81.7017	0.277661
BPH2722	16.1452	-1.23637
BPH2723	6.93276	-1.54779
BPH2724	40.0941	-0.602267
BPH2725	92.4022	0.480307
BPH2726	14.5154	-1.28691
BPH2727	27.5036	-0.915764
BPH2728	123.937	1.04169
BPH2729	13.9679	-1.30424
BPH2730	130.536	1.15361
BPH2731	14.993	-1.27195
BPH2732	173.103	1.84026
BPH2733	179.608	1.94059
BPH2734	8.3802	-1.49371
BPH2735	44.7319	-0.494235
BPH2736	56.6139	-0.231049
BPH2737	11.5607	-1.38275
BPH2738	2.24173	-1.7493
BPH2739	16.9349	-1.21238
BPH2740	75.2314	0.151405
BPH2741	94.7119	0.523134
BPH2742	16.4162	-1.2281
BPH2743	117.939	0.938451
BPH2744	99.8564	0.617457
BPH2745	53.9161	-0.289286
BPH2746	92.9099	0.489747
BPH2747	44.1285	-0.508101
BPH2748	50.4647	-0.365032
BPH2749	158.257	1.60704
BPH2750	103.556	0.684409
BPH2751	90.6239	0.447121
BPH2752	82.4201	0.291498
BPH2753	106.843	0.743322
BPH2754	138.215	1.28181
BPH2755	135.439	1.23571
BPH2756	118.04	0.940201
BPH2757	99.1194	0.604032
BPH2758	41.124	-0.57798
BPH2759	123.754	1.03857
BPH2760	79.6816	0.238564
BPH2761	39.2598	-0.62207
BPH2762	91.7797	0.46871
BPH2763	3.676	-1.68181
BPH2764	156.528	1.57948
BPH2765	36.7227	-0.683051
BPH2766	44.2642	-0.50498
BPH2767	103.714	0.687268
BPH2768	107.274	0.751022
BPH2769	64.4825	-0.065555
BPH2770	84.8531	0.3381
BPH2771	88.0348	0.398464
BPH2773	67.0457	-0.0129262
BPH2774	10.0256	-1.43513
BPH2775	66.5227	-0.0236176
BPH2776	80.7578	0.259428
BPH2777	8.25044	-1.49845
BPH2778	0.432519	-1.84942
BPH2779	11.1922	-1.39515
BPH2780	27.8436	-0.906824
BPH2781	37.5484	-0.663075
BPH2782	47.8701	-0.422956
BPH2783	19.3273	-1.14154
BPH2784	54.9861	-0.26609
BPH2785	68.5014	0.016703
BPH2786	81.3442	0.270763
BPH2787	105.474	0.718859
BPH2788	34.885	-0.727971
BPH2789	58.8526	-0.183326
BPH2790	87.2287	0.383232
BPH2791	40.2831	-0.597796
BPH2792	94.4628	0.51853
BPH2793	50.4882	-0.364512
BPH2794	53.1643	-0.305665
BPH2795	118.152	0.94214
BPH2796	67.3628	-0.00645689
BPH2797	38.2549	-0.646085
BPH2798	9.22674	-1.46323
BPH2799	12.3139	-1.35775
BPH2800	22.9148	-1.03971
BPH2801	101.056	0.639254
BPH2802	117.443	0.92984
BPH2803	104.724	0.705406
BPH2804	14.6097	-1.28395
BPH2805	108.093	0.765604
BPH2806	80.5225	0.254873
BPH2807	56.7695	-0.227715
BPH2808	50.0931	-0.373275
BPH2809	52.595	-0.318109
BPH2810	110.589	0.809829
BPH2811	41.875	-0.56038
BPH2812	143.222	1.36428
BPH2813	143.106	1.36237
BPH2814	147.373	1.43202
BPH2815	141.213	1.33129
BPH2816	65.8697	-0.0369997
BPH2817	103.868	0.690035
BPH2818	83.9767	0.321358
BPH2819	70.9581	0.0662997
BPH2820	85.9647	0.359263
BPH2821	122.779	1.02187
BPH2822	111.391	0.823988
BPH2823	15.3582	-1.26059
BPH2824	29.6689	-0.85934
BPH2825	27.8235	-0.907351
BPH2827	16.7681	-1.21742
BPH2828	29.8304	-0.855176
BPH2829	87.9913	0.397643
BPH2830	90.7797	0.450036
BPH2831	61.1638	-0.134601
BPH2832	60.038	-0.158268
BPH2833	74.7274	0.141442
BPH2834	56.8311	-0.226395
BPH2835	87.6788	0.391742
BPH2836	116.998	0.92212
BPH2837	88.3886	0.405138
BPH2838	157.648	1.59735
BPH2839	57.7843	-0.206032
BPH2840	101.222	0.642257
BPH2841	99.5804	0.612432
BPH2842	-4.6944	-2.3388
BPH2843	2.50369	-1.73641
BPH2844	101.89	0.654353
BPH2845	148.389	1.44851
BPH2846	93.3779	0.498437
BPH2847	25.5652	-0.96735
BPH2848	156.926	1.58584
BPH2849	130.329	1.15013
BPH2850	138.219	1.28188
BPH2851	10.1044	-1.43239
BPH2852	33.1862	-0.7701
BPH2853	111.673	0.828949
BPH2854	43.9193	-0.512924
BPH2855	65.1939	-0.0508882
BPH2856	-5.91019	-2.48518
BPH2857	42.8557	-0.537532
BPH2858	96.7511	0.560697
BPH2859	131.561	1.17084
BPH2860	169.441	1.7833
BPH2861	126.329	1.08245
BPH2862	150.125	1.47661
BPH2863	97.1312	0.567671
BPH2864	98.7871	0.59797
BPH2865	82.2275	0.287791
BPH2866	46.7062	-0.449231
BPH2867	24.3906	-0.999147
BPH2869	89.7915	0.431522
BPH2872	154.999	1.55503
BPH2873	142.914	1.35922
BPH2876	190.112	2.1004
BPH2877	169.418	1.78293
BPH2881	126.607	1.08718
BPH2882	127.938	1.10975
BPH2883	136.78	1.258
BPH2884	137.542	1.27066
BPH2887	186.269	2.04224
BPH2888	188.776	2.08023
BPH2890	86.9667	0.378272
BPH2891	103.772	0.688308
BPH2896	47.3867	-0.433846
BPH2897	8.05963	-1.50546
BPH2898	10.1425	-1.43107
BPH2902	6.9623	-1.54666
BPH2904	96.1677	0.549974
BPH2907	31.0288	-0.824499
BPH2922	18.8336	-1.15595
BPH2923	5.14591	-1.61875
BPH2924	122.961	1.02499
BPH2925	105.66	0.722192
BPH2926	-0.905302	-1.94888
BPH2934	78.8311	0.222017
BPH2938	87.4767	0.387922
BPH2942	164.999	1.71372
BPH2943	161.632	1.66061
BPH2946	41.3279	-0.573193
BPH2947	67.1272	-0.0112629
BPH2948	43.3662	-0.525698
BPH2949	102.359	0.662828
BPH2952	113.383	0.859012
BPH2953	122.657	1.01978
BPH2959	80.8999	0.262176
BPH2960	68.5152	0.0169833
BPH2961	69.0858	0.0285459
BPH2962	106.181	0.731515
BPH2963	106.864	0.743713
BPH2964	66.2954	-0.0282712
BPH2965	82.8087	0.298967
BPH2966	91.9611	0.472093
BPH2973	142.069	1.34536
BPH2974	108.94	0.780636
BPH2975	115.373	0.893824
BPH2976	33.6378	-0.758842
BPH2977	56.5734	-0.231916
BPH2978	72.255	0.0922813
BPH2979	69.9523	0.0460545
BPH2980	35.412	-0.715022
BPH2981	82.3919	0.290955
BPH2982	35.1421	-0.721647
BPH2987	143.164	1.36334
BPH2988	127.915	1.10936
BPH2989	90.2172	0.439504
BPH2990	78.0073	0.205942
BPH2991	79.7725	0.240329
BPH3202	65.7723	-0.0389993
BPH3204	110.776	0.813143
BPH3208	83.7341	0.316715
BPH3216	100.684	0.632503
BPH3220	125.042	1.06055
BPH3225	42.6983	-0.541189
BPH3226	141.534	1.33657
BPH3236	80.721	0.258715
BPH3244	119.049	0.957666
BPH3246	181.41	1.96819
BPH3250	107.784	0.760095
BPH3252	141.344	1.33345
BPH3258	71.6122	0.0794195
BPH3260	100.463	0.628479
BPH3262	65.339	-0.0479042
BPH3268	153.186	1.52595
BPH3270	110.642	0.810776
BPH3272	95.8923	0.544906
BPH3274	67.97	0.00590681
BPH3276	44.621	-0.496779
BPH3282	153.199	1.52616
BPH3284	115.697	0.899479
BPH3292	144.432	1.38407
BPH3294	204.686	2.31794
BPH3304	134.451	1.21923
BPH3306	130.452	1.15221
BPH3316	34.8926	-0.727784
BPH3320	167.891	1.75908
BPH3328	29.8284	-0.855228
BPH3332	76.2644	0.171767
BPH3336	129.443	1.1352
BPH3337	72.7911	0.102982
BPH3338	186.37	2.04378
BPH3340	41.0674	-0.579309
BPH3346	73.8361	0.123774
BPH3348	16.8812	-1.21401
BPH3350	51.7684	-0.336252
BPH3352	166.094	1.73091
BPH3356	34.0379	-0.748905
BPH3358	73.6206	0.119495
BPH3360	42.2075	-0.552616
BPH3361	204.372	2.3133
BPH3362	7.39747	-1.53013
BPH3366	67.9992	0.00650073
BPH3367	54.2699	-0.281601
BPH3368	73.193	0.110989
BPH3370	104.124	0.694633
BPH3372	1.55101	-1.78487
BPH3376	40.6405	-0.58936
BPH3381	146.056	1.41059
BPH3382	62.7325	-0.101833
BPH3383	32.9743	-0.775399
BPH3384	26.623	-0.939067
BPH3389	123.168	1.02854
BPH3394	12.9498	-1.33696
BPH3396	45.8426	-0.468848
BPH3401	62.4793	-0.107106
BPH3403	87.3739	0.385978
BPH3412	97.3203	0.571139
BPH3413	89.5793	0.427539
BPH3415	76.3804	0.174048
BPH3416	103.437	0.682268
BPH3417	73.6873	0.120818
BPH3423	137.593	1.27151
BPH3425	90.75	0.44948
BPH3427	37.47	-0.664968
BPH3431	62.9351	-0.097618
BPH3433	28.2962	-0.89497
BPH3434	95.6679	0.540773
BPH3435	5.47884	-1.60511
BPH3437	6.83431	-1.55156
BPH3439	31.915	-0.802027
BPH3443	41.1552	-0.577248
BPH3448	91.0387	0.454879
BPH3451	39.5078	-0.616172
BPH3453	64.6468	-0.062163
BPH3457	35.5143	-0.712514
BPH3459	76.8279	0.182841
BPH3460	174.164	1.85669
BPH3462	49.3589	-0.389611
BPH3463	82.5457	0.293913
BPH3465	17.7524	-1.18788
BPH3469	71.4278	0.0757253
BPH3473	27.9569	-0.90385
BPH3477	50.3655	-0.367231
BPH3479	53.4883	-0.298598
BPH3481	32.0636	-0.798277
BPH3482	7.68919	-1.5192
BPH3485	9.86554	-1.44071
BPH3489	8.12341	-1.50312
BPH3493	38.3925	-0.642785
BPH3499	20.7853	-1.09957
BPH3501	18.096	-1.17768
BPH3508	27.107	-0.926232
BPH3511	35.1988	-0.720255
BPH3523	54.8671	-0.268664
BPH3524	89.71	0.429993
BPH3527	35.2921	-0.717965
BPH3529	3.87905	-1.67279
BPH3535	44.3018	-0.504114
BPH3545	37.3942	-0.666796
BPH3547	102.754	0.669969
BPH3548	129.685	1.13927
BPH3568	51.6502	-0.338851
BPH3584	38.4955	-0.640318
BPH3588	44.6816	-0.495388
BPH3590	5.42011	-1.6075
BPH3596	163.473	1.68968
BPH3602	4.98332	-1.62549
BPH3612	-2.67504	-2.11619
BPH3628	178.612	1.9253
BPH3632	32.1045	-0.797246
BPH3634	70.3147	0.0533586
BPH3636	76.2385	0.171257
BPH3638	87.2459	0.383556
BPH3640	9.31589	-1.46006
BPH3643	8.57739	-1.48654
BPH3648	17.6388	-1.19127
BPH3650	66.8369	-0.0171913
BPH3652	-10.7338	-3.13515
BPH3658	51.6954	-0.337856
BPH3660	11.722	-1.37736
BPH3662	22.1649	-1.06061
BPH3664	43.9322	-0.512626
BPH3666	52.7487	-0.314747
BPH3668	43.8999	-0.513369
BPH3670	102.79	0.670618
BPH3672	82.8417	0.299601
BPH3674	32.0225	-0.799313
BPH3682	101.396	0.645402
BPH3684	9.4737	-1.45447
BPH3686	41.9965	-0.557541
BPH3688	8.93554	-1.47363
BPH3692	75.4292	0.15531
BPH3694	99.9263	0.618728
BPH3696	49.4076	-0.388527
BPH3700	72.5127	0.0974275
BPH3702	57.0531	-0.221644
BPH3704	53.9329	-0.288921
BPH3706	47.5935	-0.429184
BPH3710	18.5307	-1.16484
BPH3733	13.612	-1.3156
BPH3734	76.434	0.175102
BPH3735	22.7074	-1.04547
BPH3736	180.018	1.94688
BPH3737	78.8063	0.221535
BPH3738	139.098	1.29641
BPH3739	-0.911864	-1.94944
BPH3741	63.5609	-0.0846255
BPH3742	94.4542	0.518371
BPH3743	56.7835	-0.227414
BPH3744	85.3227	0.347049
BPH3745	82.7545	0.297925
BPH3746	125.021	1.0602
BPH3747	45.195	-0.483629
BPH3748	1.99083	-1.76194
BPH3749	9.07881	-1.4685
BPH3750	145.581	1.40284
BPH3751	32.1257	-0.79671
BPH3752	58.2271	-0.196606
BPH3753	37.4039	-0.666562
BPH3754	48.403	-0.410987
BPH3755	69.8227	0.0434409
BPH3757	-4.52466	-2.31904

## Sheet: lineages
Genetic lineages of clinical isolates (first 10 components of the multi-dimensional scaling [MDS] of the Mash distance matrix)
sample_id	MDS1	MDS2	MDS3	MDS4	MDS5	MDS6	MDS7	MDS8	MDS9	MDS10
BPH2700	-0.00137643	-0.00456116	0.00111561	-0.00208288	0.0013959	0.00154472	-0.000291806	-0.00217337	0.00448441	-0.000292024
BPH2701	0.00483051	-0.00738295	-0.00594318	0.00451188	0.000647448	-9.99195e-05	-0.00017567	-0.000156865	7.47091e-05	0.000180945
BPH2702	-0.00315274	-0.00440692	6.47087e-05	-0.00130976	0.00196794	-0.000760267	-0.0026984	0.00352354	0.000956755	0.00079624
BPH2703	-0.00488413	-0.00133165	0.00114291	0.00111709	0.00151672	-0.000838395	9.63243e-05	0.000686986	-0.000130446	6.05487e-05
BPH2704	0.00465764	-0.00353181	0.00013687	-0.00432408	0.00817439	-0.00508436	0.00519559	0.00676665	0.00392114	-0.00319305
BPH2705	0.00465764	-0.00353181	0.00013687	-0.00432408	0.00817439	-0.00508436	0.00519559	0.00676665	0.00392114	-0.00319305
BPH2706	0.0157136	0.00282941	0.00652386	0.00222418	0.00065187	0.00143701	-0.00168462	0.000602097	-0.000749282	0.00319208
BPH2707	-0.00405936	-0.00130803	0.00234517	0.00166294	0.000428675	-0.00105319	-0.000292093	-0.000538046	0.000101928	-0.00149165
BPH2708	-0.00142603	-0.00390585	0.00161338	-0.00190941	-0.000948349	0.0003046	1.47222e-05	-0.00168236	0.000609041	-0.000891548
BPH2709	-0.00140439	-0.00391604	0.00171907	-0.00185128	-0.000975274	0.00034529	1.63102e-06	-0.00168265	0.000621368	-0.000841993
BPH2710	-0.00569022	0.00438112	0.000650528	0.00162205	-0.000691359	-0.00064419	6.19071e-05	-0.000339256	3.74041e-05	-0.00083393
BPH2711	0.00483465	-0.00703465	-0.0053757	0.00471734	0.000806984	5.89352e-05	-0.000780065	-0.0007356	-0.000651472	0.000265053
BPH2712	-0.00262379	-0.00416217	0.00097913	-0.0019635	0.00159025	0.000190884	-0.00332039	0.00216815	0.000513029	-0.000168588
BPH2713	0.0162873	0.00168158	0.00579512	0.00149784	0.000756461	0.00208344	-0.00155749	0.000567305	-0.000841279	0.00256088
BPH2714	0.0162715	0.00169556	0.00586785	0.00151908	0.000837093	0.00202438	-0.00154865	0.000577121	-0.000727723	0.00268874
BPH2715	-0.000968636	-0.00507701	0.00102163	-0.00286016	-0.00392542	-0.000546523	-0.000466931	0.000541065	-0.000358731	0.00126074
BPH2716	-0.00107785	-0.00566601	0.000657552	-0.00226296	-0.00423066	-0.00154132	0.000890384	0.00171066	-4.27739e-05	0.00170992
BPH2717	0.0156788	0.00205033	0.00634162	0.00128455	0.000543661	0.00254499	-0.00120884	0.000725385	-0.000480963	0.00243356
BPH2718	-0.00569366	0.00406429	8.76401e-05	0.00153328	-0.00050677	-0.000634187	-0.000110616	-0.000372681	3.75572e-05	-0.000286153
BPH2719	-0.000841956	-0.00497991	0.000803819	-0.00270833	-0.00404963	-0.000437096	-8.78155e-05	0.00043548	-0.000447228	0.00147967
BPH2720	0.00492383	-0.00734604	-0.006326	0.00447969	0.000198813	-0.000237907	-0.000211759	-0.00023161	-3.49881e-05	-0.000360355
BPH2721	-0.00487222	-0.00116749	0.00181431	0.00190814	0.00113969	-0.000179686	-0.00010983	-0.000686746	-0.000142545	-0.00064863
BPH2722	-0.00359351	-0.0046919	0.000919834	-0.00267688	0.00129983	0.0014977	0.000642502	-0.00153887	-0.00153325	-0.00282119
BPH2723	-0.0054522	0.00418131	0.000662917	0.00139917	-0.000480087	-0.000867493	9.49981e-05	-0.000587863	2.51602e-05	-0.000596488
BPH2724	0.0087212	0.00781333	-0.0064811	-0.00375168	-0.00113978	0.000436	0.000410503	-0.000180073	7.81249e-05	0.000227051
BPH2725	0.01611	0.00185922	0.00660233	0.000898641	0.00176208	0.00273726	-0.00163635	0.00124065	0.000809548	0.00309912
BPH2726	-0.00509798	0.00397914	0.00047264	0.000927153	7.87787e-05	0.000100084	-0.000196707	0.000309236	-0.000415253	0.000338301
BPH2727	-0.00509798	0.00397914	0.00047264	0.000927153	7.87787e-05	0.000100084	-0.000196707	0.000309236	-0.000415253	0.000338301
BPH2728	0.0162207	0.00159456	0.00652849	0.00200071	-0.00146303	-0.00124773	0.000578852	-0.000989168	7.4983e-05	-0.00237712
BPH2729	0.0162207	0.00159456	0.00652849	0.00200071	-0.00146303	-0.00124773	0.000578852	-0.000989168	7.4983e-05	-0.00237712
BPH2730	0.0160326	0.00173534	0.00670805	0.00203376	-0.000957495	-0.000918299	0.000963702	-0.000831784	0.0004694	-0.0023854
BPH2731	0.00544086	-0.00110754	0.000775107	-0.00597909	0.00597442	-0.00633092	-0.000213881	-0.00518959	-0.00268255	0.00195293
BPH2732	0.0157657	0.00201661	0.00629749	0.0012418	0.00101152	0.00251572	-0.00125902	0.000643052	-0.00109384	0.00146551
BPH2733	0.0157657	0.00201661	0.00629749	0.0012418	0.00101152	0.00251572	-0.00125902	0.000643052	-0.00109384	0.00146551
BPH2734	0.00920513	0.00729684	-0.00690106	-0.0041644	-0.0015912	0.00113073	-9.90131e-05	0.000584108	-0.000613437	-0.00030068
BPH2735	0.00495867	-0.007297	-0.00618302	0.00450617	0.00021028	-0.000261463	-0.00013626	-0.000167669	3.34039e-05	-0.000308503
BPH2736	0.0155559	0.00223522	0.00620903	0.0015278	0.00138856	0.0030478	-9.72967e-05	0.000748949	-0.000160856	0.00254572
BPH2737	-0.00324248	-0.00452025	-1.37334e-05	-0.00197466	0.00173922	-1.58095e-05	-0.00307621	0.0025567	0.000461676	0.000308198
BPH2738	-0.00325904	-0.00460606	0.000105705	-0.00176605	0.00166185	-5.30648e-05	-0.00308386	0.00267707	0.000528012	0.000462563
BPH2739	-0.00182811	-0.00435382	0.00110149	-0.00157456	0.000210933	0.00133482	-0.003012	0.000560348	-0.00176631	-0.00160958
BPH2740	-0.00227882	-0.00396935	0.00110645	-0.00205754	-0.000610459	0.00200293	-0.00122641	0.0003315	-0.00117644	-0.00230367
BPH2741	-0.00157978	-0.00467781	0.000608976	-0.00192461	-0.000854305	0.00138634	-0.000392583	0.00116563	-0.00104657	0.00104239
BPH2742	0.00500644	-0.00736598	-0.00628047	0.00461738	8.20382e-05	-0.000256616	-5.54577e-05	-0.000251938	0.000207241	-0.000438789
BPH2743	-0.000805049	-0.00504453	0.0010322	-0.00248182	-0.00420539	-0.00106687	0.000275242	0.000120274	-0.00033504	9.06999e-06
BPH2744	-0.00458792	-0.00130435	0.00203385	0.00198344	0.00161074	-0.00098784	0.00014598	0.000182239	0.000183581	-0.00103908
BPH2745	-0.000895758	-0.00430002	0.0014779	-0.00220881	-0.0007508	0.00023564	-0.000414519	-8.01531e-05	-0.000617141	-0.00219122
BPH2746	-0.00429403	-0.00111464	0.00174577	0.00152982	0.00116308	-0.000600749	-0.000418824	-0.000423713	-7.1566e-05	-0.0006448
BPH2747	-0.00571615	0.0044632	0.000545136	0.00131798	-0.000285559	-0.000228396	-0.00017829	-0.0001113	-0.000140739	-0.000192208
BPH2748	-0.00566509	0.00448485	0.000672448	0.0014224	-0.000334183	-0.000208749	-0.0001415	-0.000116888	-0.000160524	-0.000173707
BPH2749	-0.00196478	-0.00426152	0.000865693	-0.00171649	-9.79976e-05	0.00159086	-0.00297411	0.000574818	-0.00180017	-0.00207068
BPH2750	0.0082133	0.00838131	-0.00642996	-0.00187799	-0.000535063	0.000234077	-2.99065e-05	0.000460239	-0.000235101	-0.000347797
BPH2751	0.0082057	0.00834282	-0.00641493	-0.00196602	-0.000474635	0.000292654	-0.000223001	0.000464352	-0.00019949	-0.000510628
BPH2752	0.00872524	0.00804906	-0.0064892	-0.00289152	-0.00122389	0.000571153	-1.57246e-05	0.000549345	5.23505e-05	-0.000538877
BPH2753	0.0055926	-0.00153736	-0.000164104	-0.00440252	0.00621458	-0.00753964	3.09719e-05	-0.00402511	-0.00200279	0.00223697
BPH2754	-0.000993939	-0.00484114	0.000816185	-0.00268923	-0.00410414	-0.000793667	0.000124925	0.000367401	-0.000255765	0.000500102
BPH2755	-0.0008893	-0.00482227	0.00084201	-0.00265102	-0.00409918	-0.000792477	0.000101034	0.00035639	-0.000319261	0.000588127
BPH2756	-0.003271	-0.00301462	0.00148206	-0.000603018	0.00228966	0.00232367	0.00534049	0.000738045	-0.00173955	0.00119657
BPH2757	-0.00131758	-0.00571387	-1.80922e-05	-0.00328854	-0.00350311	-0.000657454	0.000604057	0.00152994	0.000544356	0.00292427
BPH2758	-0.00104923	-0.00580096	0.000195415	-0.00255528	-0.00394467	-0.00190809	0.00151137	0.000620098	0.000567516	0.00104927
BPH2759	0.00876146	0.00801887	-0.00642243	-0.00373654	-0.00100099	0.000579123	-0.000560063	0.000478579	0.000870925	0.00165881
BPH2760	-0.00336674	-0.00407675	0.00110252	-0.00119536	0.00165715	0.00303638	0.00276325	-0.000316212	-0.00205646	0.000140622
BPH2761	0.00869026	0.00804602	-0.00656335	-0.00293318	-0.00120494	0.000538888	-9.79122e-06	0.000523679	4.71441e-05	-0.000568626
BPH2762	-0.00101221	-0.00508769	0.00110454	-0.0024368	-0.00474654	-0.0007168	0.000322529	0.0001337	-0.000387786	0.00107448
BPH2763	-0.00165996	-0.0046375	0.00106337	-0.00251353	0.00145292	0.0023071	-0.000872074	-0.00196233	0.00492756	0.000578298
BPH2764	-0.00165996	-0.0046375	0.00106337	-0.00251353	0.00145292	0.0023071	-0.000872074	-0.00196233	0.00492756	0.000578298
BPH2765	-0.00269984	-0.00453733	0.000151285	-0.00121081	0.00151355	-0.00121479	-0.00190549	0.00266722	0.000478743	-0.000761781
BPH2766	0.0155171	0.00181866	0.00619221	0.00120608	0.000759451	0.00211297	-0.00127359	0.00077898	-0.00114077	0.000797429
BPH2767	-0.00120257	-0.00538454	0.000824639	-0.00285397	-0.00445772	-0.00121337	-8.40798e-07	-4.25789e-05	-0.000529047	0.000754809
BPH2768	0.00895265	0.00734474	-0.00737196	-0.00242801	-0.000826295	-0.000616246	0.00130773	0.00186989	8.16695e-05	0.000565888
BPH2769	-0.00364189	-0.00452289	0.000740885	-0.00212362	0.000467109	0.00104234	0.000520566	-0.0012697	-0.0019116	-0.00366425
BPH2770	0.0166725	0.00162593	0.00648638	0.002323	-0.00171004	-0.00130059	0.000470262	-0.00157671	0.000129017	-0.00227741
BPH2771	0.0167237	0.0016886	0.00659949	0.0023658	-0.00184924	-0.00137774	0.00053007	-0.00166508	0.000257693	-0.00267748
BPH2773	-0.00366668	-0.00413457	0.000947294	-0.00250633	0.000663854	0.00184909	0.000307718	-0.0010472	-0.00210162	-0.00301858
BPH2774	0.00487808	-0.0077071	-0.00600263	0.00453574	0.000684328	-0.000188548	-0.000373841	-0.00070096	-8.03166e-05	0.000421499
BPH2775	-0.00435238	-0.00114825	0.00216733	0.00140909	0.00109506	-0.000646406	-0.000329925	-0.000588441	-0.000314895	-0.000930001
BPH2776	0.00866993	0.00808009	-0.00655797	-0.00306873	-0.00130767	0.000742605	-0.000213111	0.000292295	-0.000392362	-0.000753151
BPH2777	0.00867313	0.00799673	-0.00651829	-0.0032892	-0.000867684	0.00134858	-0.000548204	0.00039112	0.000520181	0.000260879
BPH2778	0.00867313	0.00799673	-0.00651829	-0.0032892	-0.000867684	0.00134858	-0.000548204	0.00039112	0.000520181	0.000260879
BPH2779	-0.0057306	0.00425551	0.000516842	0.00142761	-0.000566245	-0.000347096	-6.90534e-05	-0.000273954	-0.000146409	-0.000334296
BPH2780	-0.00566639	0.00433601	0.000695673	0.00161462	-0.000717756	-0.000523607	7.46036e-05	-0.000423602	-5.18153e-05	-0.000763761
BPH2781	-0.0058602	0.00404718	0.000247782	0.00235081	-0.000300244	-0.00162214	0.000854279	0.000904542	0.000242084	-9.11982e-05
BPH2782	0.00528854	-0.000704172	0.00095402	-0.00482092	0.0051577	-0.00721811	-0.000305288	-0.00559521	-0.00232314	0.00222153
BPH2783	0.00485513	-0.00738574	-0.0058873	0.00487403	-2.0489e-05	-0.000558695	0.000263255	-0.000615101	9.04933e-05	-0.000554663
BPH2784	-0.00149758	-0.00433158	0.00153926	-0.00270832	0.000891371	0.00225029	-0.000915734	-0.00260444	0.0047151	0.00067457
BPH2785	0.00480232	-0.00744164	-0.00590875	0.00458174	0.000633371	-0.000140567	-0.000264325	-0.000240932	1.66873e-05	0.000227515
BPH2786	-0.000915243	-0.00560278	0.000491678	-0.00219148	-0.00401199	-0.00240073	0.00117806	0.00111211	0.000192832	0.000543952
BPH2787	-0.0044942	0.00393764	0.000253137	0.000692146	0.000621578	0.000175931	-0.000117803	0.000303975	7.80348e-05	0.000699496
BPH2788	-0.00241918	-0.00402324	0.000915492	-0.00199711	0.00143278	0.000378323	-0.00335763	0.00213247	0.000326861	-0.000306896
BPH2789	-0.00154381	-0.00443311	0.000951045	-0.00202665	-0.000957215	0.00168611	-0.000904812	1.43861e-05	-0.00113722	0.000750646
BPH2790	0.0048547	-0.0073282	-0.00586122	0.00454091	0.000725562	-0.00019916	-0.000223765	-7.05276e-05	-4.35877e-05	0.000305436
BPH2791	-0.00180469	-0.00405295	0.00155804	-0.00218598	0.00150466	0.00169789	-9.0902e-05	-0.000482943	0.000100566	-0.000542343
BPH2792	0.0166431	0.0016658	0.00653588	0.00203811	-0.00165172	-0.00093585	0.000985521	-0.00195312	0.000193624	-0.00196031
BPH2793	-0.00104647	-0.00505948	0.000296179	-0.00286168	-0.00388464	-0.000772576	-0.000524033	0.000454651	-0.000418982	0.00161147
BPH2794	-0.00124382	-0.00574038	0.000305196	-0.00264028	-0.00394028	-0.00135792	0.00156519	0.000869953	0.000427201	0.00215313
BPH2795	0.00814074	0.00313406	-0.00186843	-0.00429359	0.00410115	0.00322182	-0.0013236	-0.000820298	0.00158369	-0.00212675
BPH2796	-0.00147374	-0.00396463	0.00157203	-0.00196461	-0.000889506	0.000216526	6.07596e-05	-0.00176139	0.000518086	-0.000932614
BPH2797	-0.00215896	-0.0039098	0.000845426	-0.00217547	-0.000578128	0.00181721	-0.00104276	0.000504402	-0.001009	-0.00235156
BPH2798	-0.00559397	0.00403997	-5.6378e-05	0.00121038	-2.34301e-05	-0.000323098	-0.000303881	2.93754e-05	-0.000216084	0.000163308
BPH2799	-0.00559397	0.00403997	-5.6378e-05	0.00121038	-2.34301e-05	-0.000323098	-0.000303881	2.93754e-05	-0.000216084	0.000163308
BPH2800	-0.00559397	0.00403997	-5.6378e-05	0.00121038	-2.34301e-05	-0.000323098	-0.000303881	2.93754e-05	-0.000216084	0.000163308
BPH2801	0.0040368	-0.00120912	-0.000399397	-0.00579868	0.0053109	-0.00420589	-0.00238573	-0.00174971	-0.00249166	-5.6069e-05
BPH2802	0.00404533	-0.00133387	-0.000289038	-0.00603508	0.00541943	-0.00404223	-0.00241172	-0.00163287	-0.00251138	0.000200705
BPH2803	0.00404533	-0.00133387	-0.000289038	-0.00603508	0.00541943	-0.00404223	-0.00241172	-0.00163287	-0.00251138	0.000200705
BPH2804	-0.00327355	-0.00389726	0.00101149	-0.00159394	0.00178511	0.00377794	0.00316604	-0.00053005	-0.0017578	0.000917077
BPH2805	0.00831824	0.00811885	-0.00602889	-0.00339523	-0.0006025	0.000888705	0.000106788	4.66098e-05	-3.18686e-05	-0.0001559
BPH2806	0.0158183	0.00162018	0.00624116	0.000838423	0.00115808	0.00251824	-0.00140144	0.000885277	-0.000257901	0.00118474
BPH2807	0.00470995	-0.00725567	-0.0059357	0.00460783	0.00057517	-0.000188002	-0.000313901	-0.000106638	-1.61801e-05	0.000337437
BPH2808	0.00470995	-0.00725567	-0.0059357	0.00460783	0.00057517	-0.000188002	-0.000313901	-0.000106638	-1.61801e-05	0.000337437
BPH2809	-0.000780548	-0.0053238	0.00137113	-0.00266357	-0.00485979	-0.00112594	0.000376001	0.000231108	-0.000412518	0.000212966
BPH2810	0.0164907	0.00176333	0.00660285	0.00112577	0.00070997	0.00227392	-0.00257394	0.000495991	-0.000403231	0.00139294
BPH2811	-0.00269887	-0.00399822	0.000605743	-0.00167757	0.00106075	-8.807e-05	-0.00335974	0.00174498	0.000545855	-0.000548193
BPH2812	-0.00345968	-0.00425834	-4.43907e-05	-0.000736329	0.00225473	0.00297887	0.0039643	0.000409021	-0.0010202	0.00122028
BPH2813	-0.0034067	-0.00421772	-3.89286e-05	-0.000673285	0.00216112	0.00304213	0.00393023	0.000447449	-0.00104475	0.00118915
BPH2814	-0.0034067	-0.00421772	-3.89286e-05	-0.000673285	0.00216112	0.00304213	0.00393023	0.000447449	-0.00104475	0.00118915
BPH2815	-0.0034067	-0.00421772	-3.89286e-05	-0.000673285	0.00216112	0.00304213	0.00393023	0.000447449	-0.00104475	0.00118915
BPH2816	-0.00283162	-0.00446526	0.000292038	-0.00137769	0.00190987	-0.000742529	-0.00252982	0.00335874	0.000999465	0.000211237
BPH2817	-0.00327873	-0.00448883	0.00109247	-0.0019945	0.000523606	0.00120421	0.000508083	-0.00117877	-0.00183222	-0.00438664
BPH2818	-0.000714561	-0.00498571	0.00126326	-0.0021125	-0.00453766	-0.000897695	0.000258189	-0.000106784	-0.000281933	0.000403481
BPH2819	-0.00085641	-0.00522831	0.0007135	-0.00262711	-0.00435861	-0.00125229	0.000159606	0.000238745	-0.000313683	0.000440915
BPH2820	-0.000829761	-0.00518485	0.000738382	-0.00257336	-0.00429411	-0.00124407	0.000184262	0.000224237	-0.000283177	0.0004058
BPH2821	-0.00246357	-0.00410131	0.000693779	-0.00269502	-0.000499734	0.00249454	-0.00129526	0.000559738	-0.00126782	-0.00176611
BPH2822	-0.00349896	-0.00463854	0.000521796	-0.000514698	0.00190305	0.00215427	0.00381825	0.000641487	-0.00199747	0.000679733
BPH2823	-0.00165615	-0.00462896	0.0010568	-0.00251085	0.00143488	0.00227242	-0.000931901	-0.00195704	0.00495406	0.000556126
BPH2824	-0.0058602	0.00404718	0.000247782	0.00235081	-0.000300244	-0.00162214	0.000854279	0.000904542	0.000242084	-9.11982e-05
BPH2825	-0.0058602	0.00404718	0.000247782	0.00235081	-0.000300244	-0.00162214	0.000854279	0.000904542	0.000242084	-9.11982e-05
BPH2827	-0.00414101	0.00388695	0.00054554	0.000693419	0.000498686	-0.000178888	-0.000690697	0.000383564	0.000250028	0.000368627
BPH2828	0.00485734	-0.00676978	-0.00566216	0.00467704	0.000132474	1.03468e-05	-0.000538806	-0.000971325	-0.000490948	-0.000679559
BPH2829	-0.00448168	-0.00113038	0.00168491	0.00122752	0.00109834	-0.000490408	-0.000487614	-0.000253884	-0.000324145	-0.000650926
BPH2830	-0.00168115	-0.00432522	0.00145245	-0.00231553	0.00114187	0.00213131	-0.000721364	-0.00221106	0.00464961	0.000862172
BPH2831	-0.00472683	-0.00147422	0.00222677	0.00210621	0.00129158	-0.00141336	-0.000107508	0.000842364	0.000284531	-6.38848e-05
BPH2832	-0.00478151	-0.00145581	0.00222949	0.00211895	0.00131898	-0.0013698	-8.76862e-05	0.000861389	0.000267606	-2.22398e-06
BPH2833	-0.00478151	-0.00145581	0.00222949	0.00211895	0.00131898	-0.0013698	-8.76862e-05	0.000861389	0.000267606	-2.22398e-06
BPH2834	0.00883453	0.00796378	-0.00654819	-0.00327486	-0.00100323	0.0010674	0.000333971	-3.86012e-05	-0.000103132	-0.0010757
BPH2835	-0.000803324	-0.00425881	0.00157706	-0.00209825	-0.000616553	0.000338533	-0.000391893	-5.49235e-05	-0.000716505	-0.00213732
BPH2836	-0.0045253	-0.0010074	0.00217749	0.00123615	0.0011128	-0.000398251	-0.000418446	-0.000376959	-0.00033409	-0.000590033
BPH2837	0.00424164	-0.00128487	-0.000330319	-0.00609695	0.00522443	-0.0042933	-0.00267258	-0.00157194	-0.00262951	0.000108128
BPH2838	-0.00209396	-0.0038832	0.000996898	-0.0019746	-0.000500076	0.00178417	-0.000985353	0.000538358	-0.000978857	-0.0022867
BPH2839	-0.00300941	-0.00386939	0.000869035	-0.00119523	0.00159742	0.00314189	0.00344726	-0.00100496	-0.00167706	-0.000275957
BPH2840	-0.00453486	-0.00159704	0.00224584	0.00235339	0.00100869	-0.00192784	0.000840816	0.000342333	0.000174835	-0.00114258
BPH2841	-0.00450352	-0.00157875	0.00222244	0.00236785	0.000966732	-0.00188524	0.000808512	0.000334042	8.0137e-05	-0.00116862
BPH2842	0.0048959	-0.00735773	-0.00574565	0.00492196	-4.40539e-05	-0.000511161	0.000328848	-0.000604603	0.000156091	-0.000588164
BPH2843	0.00485514	-0.00738575	-0.00588731	0.00487404	-2.04891e-05	-0.000558696	0.000263256	-0.000615104	9.04942e-05	-0.000554667
BPH2844	-0.00222582	-0.00459322	0.00109005	-0.00133026	0.00011714	0.00127222	-0.00321912	0.000656981	-0.00184534	-0.00128916
BPH2845	-0.00338486	-0.00415031	0.000917711	-0.000581923	0.00138668	0.0030184	0.00317772	-0.000581061	-0.00193935	-0.000452048
BPH2846	-0.00248838	-0.00453446	0.000512057	-0.00212088	-6.66153e-05	0.00150695	-0.000996458	0.0025056	-0.000291222	-0.00117046
BPH2847	0.0048517	-0.00743114	-0.00593007	0.00491107	-4.80537e-06	-0.000632366	0.000206528	-0.000619931	8.04319e-05	-0.000526788
BPH2848	-0.00323583	-0.00391741	0.000748039	-0.00134508	0.00193033	0.00329522	0.00307898	-0.000759094	-0.00153031	3.71933e-05
BPH2849	-0.000581257	-0.00479675	0.00110364	-0.00189832	-0.00442692	-0.00133153	0.000397504	-0.000207829	-7.72851e-05	-0.00061289
BPH2850	-0.000612789	-0.00485761	0.00109559	-0.00196981	-0.00437285	-0.0013419	0.000376104	-0.000164849	-6.22423e-05	-0.000604933
BPH2851	0.00478664	-0.00737091	-0.00599579	0.00450543	0.000713144	-0.000129394	-0.000259601	-1.93665e-05	-3.62509e-05	0.0002761
BPH2852	-0.00157558	-0.00422409	0.00188703	-0.00132217	0.000839598	0.000537425	0.000629664	-0.00159859	0.000450698	6.69945e-05
BPH2853	0.00861313	0.00779624	-0.00619659	-0.00324329	-0.000941154	0.000965937	0.000333971	2.65753e-05	-0.000328702	-0.000783016
BPH2854	-0.00492079	-0.00148447	0.0019591	0.00164197	0.00151499	-0.000631947	-0.00054376	-0.000767661	-0.000185598	0.000147498
BPH2855	-0.00256695	-0.00450876	0.000424919	-0.00127622	0.00172087	-0.00107623	-0.0017816	0.00279903	0.000584516	-0.000820421
BPH2856	0.00483489	-0.00691368	-0.00559198	0.00476552	0.000599288	-0.000367685	-0.000523165	-0.000529393	-0.000741031	-0.000277137
BPH2857	-0.00159155	-0.00423447	0.00189772	-0.00135778	0.000827035	0.000562202	0.000620038	-0.00158856	0.000441046	5.51893e-05
BPH2858	0.00479825	-0.00737614	-0.00600442	0.00450276	0.000683618	-0.000110276	-0.000294437	1.26386e-05	-4.88643e-05	0.00025684
BPH2859	0.00464671	-0.00355825	0.00012639	-0.00433028	0.00816594	-0.0051062	0.00521504	0.00677539	0.0039508	-0.00328658
BPH2860	-0.00162158	-0.00440418	0.00136657	-0.00234558	0.000884938	0.0017323	-0.00083237	-0.00269712	0.00497227	-0.000287192
BPH2861	0.00831571	0.00758964	-0.00608482	-0.00333765	-0.000153312	0.00108387	0.000656352	-0.000809683	0.000190356	-0.000798183
BPH2862	0.00832085	0.00761156	-0.00610709	-0.00334416	-0.000161455	0.00107617	0.000685613	-0.000842806	0.000231815	-0.000785745
BPH2863	0.00858265	0.00782121	-0.00631668	-0.0033211	-0.000913411	0.000920373	0.000355611	1.97849e-05	-0.000391307	-0.000692745
BPH2864	0.00858265	0.00782121	-0.00631668	-0.0033211	-0.000913411	0.000920373	0.000355611	1.97849e-05	-0.000391307	-0.000692745
BPH2865	0.0157761	0.00182745	0.00627764	0.00172758	-0.000140467	0.00137154	-0.00116612	0.000378551	-0.00122022	0.000577061
BPH2866	-0.00289506	-0.00437232	0.000127951	-0.0014235	0.00191638	-0.000244939	-0.00286815	0.00306899	0.000831756	0.000551382
BPH2867	-0.00286055	-0.00438105	0.000233697	-0.00130521	0.00193414	-0.000346265	-0.00280331	0.00310821	0.000830461	0.000598683
BPH2869	-0.00455047	0.00405574	0.000348633	0.00081338	0.000591443	0.000198663	-0.000110712	0.000225047	-1.09085e-05	0.00111192
BPH2872	-0.000726194	-0.00579114	0.000740993	-0.00180995	-0.00405622	-0.00210979	0.00109394	0.0011537	9.42472e-05	0.000210106
BPH2873	-0.000726194	-0.00579114	0.000740993	-0.00180995	-0.00405622	-0.00210979	0.00109394	0.0011537	9.42472e-05	0.000210106
BPH2876	-0.00158786	-0.00471047	0.00115577	-0.0023236	0.00140326	0.00205802	-0.000786452	-0.00218348	0.00488466	0.000284662
BPH2877	-0.00158783	-0.00471034	0.00115568	-0.00232333	0.00140311	0.00205755	-0.000786211	-0.00218225	0.00488235	0.000284607
BPH2881	-0.00117004	-0.00594203	0.000469641	-0.00243687	-0.00482606	-0.00200843	0.0011368	0.000961345	-0.000118705	0.00148647
BPH2882	-0.00114497	-0.00591691	0.000473834	-0.00241261	-0.00480204	-0.00199954	0.00111675	0.000955086	-0.000132723	0.00146464
BPH2883	-0.00101491	-0.00532621	0.000848241	-0.00307595	-0.00403024	-0.00113991	0.000540936	-0.000566906	1.29718e-05	0.000776373
BPH2884	-0.00101488	-0.00532582	0.000848113	-0.00307525	-0.00402846	-0.00113917	0.000540629	-0.00056738	1.31732e-05	0.000775611
BPH2887	0.0170815	0.00169531	0.00634877	0.00265006	-0.00122462	-0.00184399	0.00215054	-0.000341033	0.000183965	-0.00147074
BPH2888	0.0170379	0.00170863	0.00632508	0.00269878	-0.00124866	-0.00194088	0.00207282	-0.000275171	0.000262899	-0.00140942
BPH2890	-0.00151237	-0.00456058	0.00105039	-0.00227662	0.00137144	0.00194287	-0.000565074	-0.00215239	0.00464214	0.000237914
BPH2891	-0.00151237	-0.00456058	0.00105039	-0.00227662	0.00137144	0.00194287	-0.000565074	-0.00215239	0.00464214	0.000237914
BPH2896	-0.00566639	0.00433601	0.000695673	0.00161462	-0.000717756	-0.000523607	7.46036e-05	-0.000423602	-5.18153e-05	-0.000763761
BPH2897	0.0089623	0.00749506	-0.00663661	-0.00405073	-0.00138642	0.000986757	-1.0263e-05	0.000370057	-0.000492778	-0.000537407
BPH2898	0.0089623	0.00749506	-0.00663661	-0.00405073	-0.00138642	0.000986757	-1.0263e-05	0.000370057	-0.000492778	-0.000537407
BPH2902	0.0166949	0.000395353	0.00586755	0.00223186	-0.000340427	-0.00182042	0.00383665	9.72061e-05	0.00179217	2.44723e-05
BPH2904	0.0166422	0.000706782	0.00576137	0.0029686	-0.00104231	-0.00311625	0.0021705	0.00197282	0.000538649	-0.0010094
BPH2907	-0.00576659	0.00427917	0.000498576	0.00146436	-0.000585005	-0.00036527	-9.86199e-05	-0.000323122	-0.000145934	-0.000430164
BPH2922	-0.0034517	-0.0041314	0.00144448	-0.00136052	0.00187636	0.00379568	0.00351595	-0.000562941	-0.00176873	0.000120928
BPH2923	-0.0034517	-0.0041314	0.00144448	-0.00136052	0.00187636	0.00379568	0.00351595	-0.000562941	-0.00176873	0.000120928
BPH2924	-0.00325647	-0.00383965	0.000744701	-0.00138015	0.00181618	0.00352945	0.00313546	-0.000628095	-0.00162025	6.05494e-05
BPH2925	-0.00325647	-0.00383965	0.000744701	-0.00138015	0.00181618	0.00352945	0.00313546	-0.000628095	-0.00162025	6.05494e-05
BPH2926	-0.0034517	-0.0041314	0.00144448	-0.00136052	0.00187636	0.00379568	0.00351595	-0.000562941	-0.00176873	0.000120928
BPH2934	0.00794758	0.00334825	-0.00156423	-0.00305669	0.00325767	0.00214967	-0.00106443	-0.00048385	0.000837172	-0.00325164
BPH2938	0.00864692	0.00778486	-0.00626026	-0.00308896	-0.00105641	0.000782073	0.000382942	2.26447e-05	-4.3874e-05	-0.000725563
BPH2942	-0.000842873	-0.00510356	0.000676391	-0.0025142	-0.00426552	-0.00117795	0.000159973	0.000248366	-0.00028568	0.000184455
BPH2943	-0.000754653	-0.00500063	0.000741419	-0.00244431	-0.00415657	-0.00124647	0.000195177	0.000130386	-0.000266683	-4.00589e-05
BPH2946	-0.00569366	0.00406429	8.76401e-05	0.00153328	-0.00050677	-0.000634187	-0.000110616	-0.000372681	3.75572e-05	-0.000286153
BPH2947	-0.00566639	0.00433601	0.000695673	0.00161462	-0.000717756	-0.000523607	7.46036e-05	-0.000423602	-5.18153e-05	-0.000763761
BPH2948	-0.00566639	0.00433601	0.000695673	0.00161462	-0.000717756	-0.000523607	7.46036e-05	-0.000423602	-5.18153e-05	-0.000763761
BPH2949	-0.00332488	-0.00452961	0.000361261	-0.000472124	0.00224615	0.00256757	0.00409351	0.000499838	-0.000947722	0.000585558
BPH2952	0.0161989	0.000937293	0.00565746	0.00239061	0.00139256	0.00108842	-2.17577e-06	0.00295355	-0.000671095	0.00192218
BPH2953	0.0161989	0.000937293	0.00565746	0.00239061	0.00139256	0.00108842	-2.17577e-06	0.00295355	-0.000671095	0.00192218
BPH2959	-0.00076906	-0.00537634	0.00052895	-0.00223005	-0.00372134	-0.00147026	0.000649913	0.00117826	-0.000161142	0.000771014
BPH2960	-0.00076906	-0.00537634	0.00052895	-0.00223005	-0.00372134	-0.00147026	0.000649913	0.00117826	-0.000161142	0.000771014
BPH2961	-0.00076906	-0.00537634	0.00052895	-0.00223005	-0.00372134	-0.00147026	0.000649913	0.00117826	-0.000161142	0.000771014
BPH2962	-0.00183613	-0.00433657	0.000967802	-0.00177309	8.61253e-05	0.0014735	-0.0031891	0.000648139	-0.00178177	-0.0015364
BPH2963	-0.00183613	-0.00433657	0.000967802	-0.00177309	8.61253e-05	0.0014735	-0.0031891	0.000648139	-0.00178177	-0.0015364
BPH2964	-0.00183613	-0.00433657	0.000967802	-0.00177309	8.61253e-05	0.0014735	-0.0031891	0.000648139	-0.00178177	-0.0015364
BPH2965	-0.00485568	-0.000704158	0.0014291	0.00037451	0.00126636	0.000316852	-0.000575253	-0.000572628	-0.00033393	6.99175e-05
BPH2966	-0.00485568	-0.000704158	0.0014291	0.00037451	0.00126636	0.000316852	-0.000575253	-0.000572628	-0.00033393	6.99175e-05
BPH2973	0.00825941	0.00819583	-0.00641485	-0.00268006	-0.000450369	0.00072034	0.000180642	0.000337345	0.000605971	-0.000453538
BPH2974	0.00825941	0.00819583	-0.00641485	-0.00268006	-0.000450369	0.00072034	0.000180642	0.000337345	0.000605971	-0.000453538
BPH2975	0.00825941	0.00819583	-0.00641485	-0.00268006	-0.000450369	0.00072034	0.000180642	0.000337345	0.000605971	-0.000453538
BPH2976	-0.00584611	0.00379452	-0.00052648	0.00236219	0.000210784	-0.00134886	0.000431002	0.00102917	0.000251149	0.000531714
BPH2977	-0.00584611	0.00379452	-0.00052648	0.00236219	0.000210784	-0.00134886	0.000431002	0.00102917	0.000251149	0.000531714
BPH2978	-0.00589192	0.00380749	-0.000539589	0.00237433	0.000214381	-0.00136109	0.000422623	0.00105458	0.000265507	0.000555875
BPH2979	-0.00584611	0.00379452	-0.00052648	0.00236219	0.000210784	-0.00134886	0.000431002	0.00102917	0.000251149	0.000531714
BPH2980	-0.00584611	0.00379452	-0.00052648	0.00236219	0.000210784	-0.00134886	0.000431002	0.00102917	0.000251149	0.000531714
BPH2981	-0.00584611	0.00379452	-0.00052648	0.00236219	0.000210784	-0.00134886	0.000431002	0.00102917	0.000251149	0.000531714
BPH2982	-0.00589161	0.00384949	-0.000276656	0.00275352	-0.000237219	-0.00173363	0.00060536	0.000738853	0.000397819	0.000176646
BPH2987	0.00834577	0.00817748	-0.00619105	-0.00258657	-0.000698961	0.000849413	0.000126945	3.99085e-05	4.32869e-05	-0.000173815
BPH2988	0.00834577	0.00817748	-0.00619105	-0.00258657	-0.000698961	0.000849413	0.000126945	3.99085e-05	4.32869e-05	-0.000173815
BPH2989	-0.00462538	-0.000966963	0.00210915	0.00104932	0.00129038	8.89996e-05	-0.00104331	-3.45555e-05	3.16564e-05	-0.000117535
BPH2990	-0.00462538	-0.000966963	0.00210915	0.00104932	0.00129038	8.89996e-05	-0.00104331	-3.45555e-05	3.16564e-05	-0.000117535
BPH2991	-0.00462538	-0.000966963	0.00210915	0.00104932	0.00129038	8.89996e-05	-0.00104331	-3.45555e-05	3.16564e-05	-0.000117535
BPH3202	-0.00496402	0.00412478	0.000259434	0.000577821	0.000474695	0.000124326	5.26457e-05	0.000255241	5.14951e-05	0.000970552
BPH3204	-0.00430699	0.00379457	0.000628919	0.000684697	0.00053485	1.91097e-05	-0.0002439	0.000146939	1.76818e-05	0.000404051
BPH3208	-0.00499083	0.0041263	0.00021202	0.000501268	0.00049483	7.23352e-05	-0.000120263	0.000204378	9.31687e-05	0.00063983
BPH3216	-0.00354619	-0.00425742	0.00104718	-0.00213537	0.000638017	0.00173056	0.000370384	-0.00110695	-0.00209001	-0.0029661
BPH3220	-0.00482726	0.00407304	0.000256778	0.000505876	0.00054422	9.75358e-05	-0.000157937	0.000192622	7.67055e-05	0.000709035
BPH3225	0.00832066	0.00811519	-0.00647518	-0.0032238	-0.000423248	0.00117896	0.00113525	-0.00108074	0.00113783	0.000500682
BPH3226	-0.00435914	0.0038702	0.000584298	0.000643968	0.000460666	-9.70677e-06	-0.000188598	0.000144792	0.000126915	0.00038441
BPH3236	-0.00503479	0.00406387	0.000471694	0.000422564	0.000202004	-0.000220498	9.11929e-05	0.000113079	0.000304796	0.000462925
BPH3244	-0.00513824	0.00414883	0.000493545	9.54759e-05	0.000289803	7.81776e-05	7.1306e-06	-0.0010835	0.000729551	0.00144757
BPH3246	-0.00331988	-0.00398589	0.000775168	-0.00103771	0.0018161	0.00369839	0.0032365	-0.000703373	-0.00124367	0.000755209
BPH3250	-0.00529757	0.00423606	0.000260921	0.000588213	0.000138928	-7.35848e-05	-5.53557e-05	-0.00041023	0.000548534	0.000507391
BPH3252	-0.001608	-0.006118	-0.000244818	-0.00325006	-0.00437296	-0.00109951	0.000490557	0.00183995	0.000850887	0.00303964
BPH3258	-0.00479809	0.00399335	0.000496053	0.000448366	0.000368693	-1.35585e-05	2.87893e-06	0.000309245	-2.09854e-05	0.00065146
BPH3260	-0.00522129	0.00421193	0.000286583	0.000568391	0.000136703	-8.42192e-05	-4.1007e-05	-0.000441746	0.00056068	0.000483922
BPH3262	-0.00533545	0.0042472	0.000258541	0.00058384	0.000106679	-6.61565e-05	-5.63615e-05	-0.000432297	0.000566097	0.000474602
BPH3268	-0.00177979	-0.00434257	0.00128865	-0.00216057	0.000355859	0.00164136	-0.000495174	-0.00393043	0.00546637	-0.000579187
BPH3270	-0.00360308	-0.00433386	0.00117913	-0.00213131	0.000565062	0.00177981	0.000339929	-0.00120781	-0.00191312	-0.00293824
BPH3272	-0.00515454	0.00410775	0.000390201	6.73502e-06	0.000313235	4.84869e-05	2.84325e-06	-0.0011076	0.000752594	0.00135214
BPH3274	-0.000897439	-0.00553483	0.000888545	-0.00229387	-0.00477474	-0.00111431	0.000284784	-0.000510224	0.000540164	0.000453264
BPH3276	-0.00542915	0.00430531	0.000468375	0.000195169	0.00024276	-0.000544533	-0.000558391	-0.000733879	0.000109956	0.00141536
BPH3282	-0.000894448	-0.00557283	0.000979042	-0.0022509	-0.00487838	-0.00107831	0.000271513	-0.000491024	0.00054638	0.000513521
BPH3284	-0.00528202	0.00418118	0.000512843	8.3699e-05	0.000283113	0.000142208	-1.91439e-05	-0.00109721	0.000751371	0.00145438
BPH3292	-0.00419997	0.00373423	0.000661443	0.00067091	0.000562972	-4.31138e-06	-0.000204978	0.000202406	-2.94029e-05	0.000250203
BPH3294	-0.00359225	-0.00407196	0.000627441	-0.00127638	0.00187173	0.00387915	0.00329744	-0.000635796	-0.00134263	0.000956389
BPH3304	-0.00173923	-0.00441059	0.0013649	-0.00196099	0.000391867	0.00153218	-0.000465926	-0.00390055	0.00541204	-0.000602914
BPH3306	-0.00521044	0.00426333	0.000260302	0.0006938	9.16986e-05	6.88882e-07	-7.03594e-05	-0.00042761	0.000553641	0.000495492
BPH3316	-0.00511452	0.00415287	0.000501682	0.000516693	0.000167771	-0.000150992	-9.86934e-06	-0.000255442	0.000585124	0.000425262
BPH3320	-0.00470925	0.00391729	0.00068072	0.000613566	0.000172719	-0.000172151	-0.000141728	-0.000429024	0.000562261	0.000651696
BPH3328	-0.00567141	0.0042478	0.000556788	0.00143782	-0.000575904	-0.000398509	-5.25741e-05	-0.000292611	-0.00010579	-0.000318701
BPH3332	-0.00612889	0.00468986	0.00100924	0.00161543	-0.00108225	-0.000738123	-2.56692e-06	-0.000780416	0.000593182	-0.000444161
BPH3336	-0.000862875	-0.00544772	0.000742807	-0.00262229	-0.0042856	-0.000608175	6.68228e-05	8.46446e-05	0.000402413	0.00123424
BPH3337	-0.00529195	-0.000534011	0.00153499	0.000265065	0.00100934	0.000778579	-0.000920557	-0.00075877	-1.60736e-05	0.001236
BPH3338	0.0173823	0.00247677	0.00708483	0.00212574	-0.00193203	-0.000885591	0.00121281	-0.0028555	0.0013335	-0.000765397
BPH3340	0.0173069	0.0025135	0.00701251	0.00226111	-0.00206375	-0.000867284	0.00124596	-0.00257415	0.00119414	-0.000659861
BPH3346	-0.00560138	0.00419174	0.000500152	0.0013744	-0.000552959	-0.000409025	5.40566e-05	-0.000202001	-0.000173439	-0.000380329
BPH3348	-0.00566764	0.00436334	0.000798431	0.00169008	-0.000751666	-0.000496006	7.34497e-05	-0.000388026	-5.38236e-05	-0.000744669
BPH3350	0.0157218	0.0017694	0.00647261	0.00122662	0.000870888	0.00277252	-0.000215615	0.00080442	-0.000868106	0.00143875
BPH3352	0.0171848	0.00131838	0.0061375	0.00288011	-0.0011961	-0.002702	0.00157207	0.00119402	0.000491419	-0.000874587
BPH3356	-0.00579347	0.00427934	0.000325034	0.00123052	-0.000157698	5.63842e-05	-0.000306171	-3.04499e-05	-0.000368773	0.000197056
BPH3358	0.00895348	0.00714087	-0.00688931	-0.00265835	-0.000720644	-0.000708818	0.000577994	0.00164533	0.000482823	-0.000548003
BPH3360	-0.00600967	0.00418626	0.000736497	0.00156477	-0.000567605	-0.000451294	-7.32549e-05	-0.000393781	-0.000200492	-0.000550695
BPH3361	-0.00459538	-0.000926889	0.00220818	0.00151922	0.000981996	-0.000306994	-0.000293661	-0.000244663	-0.000109756	-0.000623693
BPH3362	-0.00560326	0.004271	0.000647638	0.00150864	-0.000615608	-0.000503705	6.81697e-05	-0.000360679	-7.49327e-05	-0.000607435
BPH3366	-0.0056562	0.00433826	0.000723048	0.00161755	-0.000732063	-0.000489444	6.18251e-05	-0.000398318	-2.80716e-08	-0.000600481
BPH3367	-0.00167365	-0.00436471	0.00206638	-0.00123799	0.000932696	0.000649414	0.000511672	-0.00156787	0.000487012	0.000424562
BPH3368	-0.00576269	0.00438955	0.000574925	0.00138375	-0.000350086	-0.000182633	-0.000127846	-0.000260953	-7.41546e-05	-0.000310686
BPH3370	-0.00552434	0.00418009	0.00049985	0.00140634	-0.000615466	-0.000454747	-3.56837e-05	-0.000270067	-0.000152347	-0.000271801
BPH3372	-0.00572662	0.00431771	0.000617904	0.00171877	-0.000718441	-0.000521737	3.4565e-05	-0.000460049	-5.12619e-05	-0.000753425
BPH3376	-0.00557863	0.00438396	0.000879854	0.00158743	-0.000794505	-0.000596312	0.000125016	-0.000396511	9.69201e-05	-0.000700502
BPH3381	0.0160511	0.0017613	0.00652902	0.000901171	0.00109609	0.00279739	-0.00231943	0.00177306	8.91837e-05	0.00122891
BPH3382	-0.00524056	0.00403384	0.000534382	0.00124062	-0.000441823	-0.000337278	1.97385e-05	-0.00016779	-0.000292983	-0.000242189
BPH3383	-0.00306828	-0.00451025	0.000237619	-0.00119113	0.00193805	-0.000515184	-0.00281065	0.00384812	0.000821528	0.000392336
BPH3384	0.00494321	-0.00758358	-0.00677449	0.00450566	1.19295e-05	-0.000199177	-0.00038731	-0.000779014	0.000740607	0.000556061
BPH3389	-0.00276377	-0.00405951	0.00090886	-0.00207154	0.00154897	0.000365921	-0.00349465	0.00243865	0.000573609	-5.96812e-05
BPH3394	-0.00572854	0.00425357	0.000515307	0.00142452	-0.000568897	-0.000345598	-6.73507e-05	-0.000273487	-0.000147266	-0.000337323
BPH3396	0.00478493	-0.00756776	-0.00603314	0.00440849	0.000758827	-0.000268825	-0.000388392	-0.000535129	-0.000170011	0.00042392
BPH3401	-0.00554552	0.00433792	0.000600652	0.00128179	-0.000304495	-0.000245681	-4.40553e-05	-4.24529e-05	-0.00018821	-0.000193259
BPH3403	-0.00624116	0.00473273	0.000430338	0.00156012	-0.000491635	-0.000583488	-0.000155673	-0.000495575	-0.000135234	-0.000306413
BPH3412	-0.0010343	-0.00573973	0.000816338	-0.00231186	-0.00409865	-0.00222005	0.00105249	0.00105065	7.10993e-05	0.000717865
BPH3413	-0.00565898	0.0043146	0.000662975	0.00158222	-0.000712012	-0.000506515	6.65939e-05	-0.000449613	-6.6039e-05	-0.000752725
BPH3415	-0.00628318	0.00439603	-9.81495e-05	0.00226814	1.54492e-05	-0.000741284	0.000480272	0.00018816	0.000207584	-0.000180331
BPH3416	-0.000820518	-0.00495292	0.000934074	-0.00240041	-0.00457451	-0.00132422	0.000413794	-7.20941e-05	-0.0001809	-0.000302823
BPH3417	-0.0055833	0.0043546	0.000590405	0.00128975	-0.000294651	-0.00023097	-9.06711e-05	-7.30749e-05	-0.000200858	-0.000177579
BPH3423	-0.00200783	-0.00421806	0.000832843	-0.0015995	-4.98261e-05	0.0014252	-0.00304239	0.000420794	-0.00194953	-0.00187935
BPH3425	-0.00175252	-0.0040162	0.00158139	-0.00215471	0.00147423	0.00172688	-9.95778e-05	-0.000457244	4.83455e-05	-0.000520757
BPH3427	0.00488908	-0.00746248	-0.0064127	0.00429086	0.000321059	-0.000506341	-0.000339438	-0.000585222	-0.000133808	2.87685e-05
BPH3431	-0.00562029	0.00437421	0.000598098	0.00128945	-0.000297715	-0.000218612	-0.000132037	-0.000109094	-0.000194386	-0.000178206
BPH3433	-0.00554584	0.0043384	0.000600748	0.00128239	-0.000304584	-0.000246115	-4.41403e-05	-4.23449e-05	-0.000188255	-0.000193338
BPH3434	-0.00200783	-0.00421806	0.000832843	-0.0015995	-4.98261e-05	0.0014252	-0.00304239	0.000420794	-0.00194953	-0.00187935
BPH3435	-0.00569289	0.00429164	0.000600633	0.00168958	-0.000687052	-0.000547087	7.69354e-05	-0.000436335	-4.37738e-05	-0.000767926
BPH3437	0.00481366	-0.00745933	-0.00603535	0.00453358	0.000568108	-0.000115598	-0.000279086	-0.000212956	2.77513e-05	0.000145248
BPH3439	-0.00571277	0.00435603	0.000749761	0.0014317	-0.000271604	-0.000205948	4.51341e-05	2.60251e-05	0.000109988	-0.000551476
BPH3443	-0.0057306	0.00425551	0.000516841	0.0014276	-0.000566244	-0.000347095	-6.90532e-05	-0.000273953	-0.000146409	-0.000334294
BPH3448	0.00858134	0.00826966	-0.00646835	-0.00322631	-0.00121178	0.00131905	0.000480083	1.78046e-05	-0.0006755	-0.000215091
BPH3451	-0.00577741	0.00432744	0.000443435	0.00147627	-0.000285905	-0.000130448	-0.000135549	-0.000149076	-0.000292601	-0.000205375
BPH3453	-0.00566589	0.00434538	0.000748661	0.00164337	-0.00077582	-0.000622013	0.000131514	-0.000519707	8.43105e-06	-0.000900789
BPH3457	-0.00573279	0.00440623	0.000885954	0.00175135	-0.00083429	-0.000576876	6.05745e-05	-0.000490314	-8.62832e-06	-0.000854947
BPH3459	-0.000975559	-0.00526505	0.000889329	-0.00293715	-0.00420623	-0.000954102	0.00056251	-0.00057877	6.51993e-06	0.000583263
BPH3460	-0.00278208	-0.0040455	0.000796204	-0.0021297	0.00157761	0.000343575	-0.00346901	0.00241792	0.000567351	-5.51181e-05
BPH3462	-0.000973212	-0.00525674	0.000900072	-0.0029301	-0.00421458	-0.000958841	0.000571018	-0.00062221	3.81668e-05	0.0005917
BPH3463	-0.00560774	0.00414261	0.0011753	0.00153304	-0.000429127	-0.000890151	0.00124896	0.000111558	0.000889125	-0.000212701
BPH3465	-0.00565768	0.00421578	0.000527127	0.00139604	-0.00055699	-0.00032936	-4.65902e-05	-0.000262554	-0.000178096	-0.000373782
BPH3469	-0.00553301	0.00436194	0.000589947	0.00131623	-0.000190543	-0.000151936	-2.27065e-05	-3.8863e-05	-0.000339846	-0.000316782
BPH3473	-0.0057316	0.00425311	0.000518057	0.00142296	-0.00056418	-0.000340096	-6.62744e-05	-0.000283325	-0.000162591	-0.000367507
BPH3477	0.0166363	0.00180966	0.00673139	0.00216356	-0.00186801	-0.00144927	0.000386495	-0.00149267	-8.64013e-05	-0.00301675
BPH3479	0.0165692	0.00175083	0.00667566	0.0021187	-0.00188494	-0.00147853	0.000394588	-0.00147706	4.89764e-05	-0.00286739
BPH3481	0.00482491	-0.00763153	-0.00602477	0.0044464	0.000709362	-0.000221339	-0.000315903	-0.000669791	-5.39153e-05	0.000378178
BPH3482	-0.00208507	-0.00431519	0.000855311	-0.00181533	0.000136585	0.00150222	-0.0030845	0.000514338	-0.00188226	-0.00166653
BPH3485	-0.00576659	0.00427917	0.000498576	0.00146436	-0.000585005	-0.00036527	-9.86199e-05	-0.000323122	-0.000145934	-0.000430164
BPH3489	0.00461189	-0.00732564	-0.00635791	0.00509749	0.000509156	-6.41078e-05	-0.000614381	-0.000200904	0.000102029	0.00139432
BPH3493	-0.00554584	0.0043384	0.000600748	0.00128239	-0.000304584	-0.000246115	-4.41403e-05	-4.23449e-05	-0.000188255	-0.000193338
BPH3499	-0.00566534	0.00433435	0.00069541	0.00161326	-0.000718515	-0.000523401	7.5041e-05	-0.000424659	-5.23042e-05	-0.000767878
BPH3501	0.00462295	-0.00735448	-0.00638736	0.00510523	0.000523129	-3.87568e-05	-0.000660288	-0.00019266	6.27872e-05	0.00145306
BPH3508	-0.00210507	-0.00432675	0.000845094	-0.00181928	0.000120677	0.00150872	-0.0030985	0.000530489	-0.00187733	-0.00169918
BPH3511	-0.00576659	0.00427917	0.000498576	0.00146436	-0.000585005	-0.00036527	-9.86199e-05	-0.000323122	-0.000145934	-0.000430164
BPH3523	-0.0056086	0.00436073	0.000745975	0.00151446	-0.000725003	-0.000642107	0.000129276	-0.000380761	5.23826e-05	-0.000737664
BPH3524	0.00863784	0.00791767	-0.00632852	-0.00369463	-0.00104477	0.00152986	0.000607352	-0.000390119	9.07195e-05	0.000586887
BPH3527	-0.0056086	0.00436073	0.000745975	0.00151446	-0.000725003	-0.000642107	0.000129276	-0.000380761	5.23826e-05	-0.000737664
BPH3529	-0.00561708	0.00437513	0.000777167	0.00152933	-0.000740717	-0.000667025	0.000120514	-0.000400686	7.74081e-05	-0.000713931
BPH3535	-0.00576165	0.00425644	0.000432563	0.00143824	-0.000634898	-0.000491043	-0.000113704	-0.00035647	-7.97917e-05	-0.000540237
BPH3545	-0.00565625	0.00423097	0.000521242	0.00141656	-0.000547937	-0.000349287	-5.64074e-05	-0.000266718	-0.000143079	-0.000344456
BPH3547	-0.00618663	0.00452853	0.000528987	0.001407	-0.00064381	-0.000354957	-0.000318137	-0.000300374	-2.40461e-05	-0.000166907
BPH3548	0.00863493	0.00795713	-0.00634635	-0.00369585	-0.00103877	0.00154815	0.000595008	-0.000391819	6.33287e-05	0.000667222
BPH3568	0.00508234	-0.00717846	-0.00611501	0.0043775	0.000139514	-0.000322408	-0.000354926	-0.000365699	-0.000360478	-0.000410485
BPH3584	0.00582273	-0.00193703	-0.000215786	-0.00516612	0.00682404	-0.00769131	0.000332642	-0.00338434	-0.0020809	0.00314426
BPH3588	0.00582273	-0.00193703	-0.000215786	-0.00516612	0.00682404	-0.00769131	0.000332642	-0.00338434	-0.0020809	0.00314426
BPH3590	0.00484017	-0.00735597	-0.00665152	0.00465903	0.000173566	-0.000156309	-0.000414711	-0.000249997	8.46805e-05	0.00035406
BPH3596	-0.00381826	-0.00468226	0.000231191	-0.000745971	0.00228876	0.00283935	0.00455186	0.00051491	-0.00106451	0.00110404
BPH3602	0.00495617	-0.0073912	-0.00636186	0.00448183	0.000163182	-0.000273389	-0.000149856	-0.00028486	2.50725e-05	-0.00028777
BPH3612	0.00500509	-0.00741078	-0.00646232	0.00453596	0.000140828	-0.00026643	-0.00017788	-0.000256952	7.91281e-05	-0.000239682
BPH3628	-0.00380668	-0.00464714	0.00010502	-0.000800935	0.0023119	0.00276386	0.00451843	0.000492366	-0.00104758	0.0010402
BPH3632	-0.0047702	0.00399852	0.000226604	0.00060783	0.000509237	-0.000119342	-0.000148202	0.000223972	0.000230217	0.000591093
BPH3634	-0.00477155	0.00392977	0.000379828	0.000612196	0.000415579	-3.81493e-05	-4.16735e-06	0.000341495	-2.38203e-05	0.000706902
BPH3636	-0.00484849	0.00409354	0.000139497	0.000692373	0.000498579	0.000124766	-0.000135462	0.000248257	0.000112812	0.000729944
BPH3638	-0.00476566	0.00405663	0.000179519	0.000709482	0.000551407	9.48749e-05	-0.000140989	0.000244802	0.00013298	0.000707173
BPH3640	-0.00453979	0.00395187	0.000254767	0.000705324	0.0005969	0.000175346	-0.000124912	0.000273513	0.000110368	0.000688711
BPH3643	-0.00426279	0.00376101	0.000275621	0.000578501	0.000765067	0.000252782	-0.000187158	0.000307924	-1.16085e-05	0.00056623
BPH3648	-0.00478048	0.00410006	0.000247535	0.000638554	0.000514131	0.000147586	-0.000182237	0.000181566	7.47025e-05	0.000726652
BPH3650	-0.00452717	0.00397761	0.000368986	0.000780693	0.000569955	0.000224409	-0.000140623	0.000293218	0.000105354	0.000744371
BPH3652	-0.00480215	0.00413206	0.00017274	0.000677408	0.000519346	0.000117573	-0.000124007	0.000270504	0.000133816	0.000700644
BPH3658	-0.00480619	0.0040766	0.000155803	0.000699195	0.000516595	0.000114433	-0.000133106	0.000253259	0.000120508	0.00070823
BPH3660	-0.00417052	0.0038079	0.00046172	0.000543616	0.000750877	0.000253294	-0.000126745	0.000362909	-5.01774e-06	0.000592925
BPH3662	-0.00471718	0.00405212	0.00017419	0.00072994	0.000579383	9.46707e-05	-0.0001345	0.000254741	0.000143258	0.000733122
BPH3664	-0.00481711	0.00400476	0.000227378	0.000596782	0.000561204	-5.95949e-05	-7.6804e-05	0.000220407	0.000208556	0.000531535
BPH3666	-0.00491733	0.00416572	0.000239033	0.000723799	0.000483509	0.000196657	5.91288e-06	0.000283194	7.92573e-06	0.00103303
BPH3668	-0.0048513	0.00422705	0.000302065	0.000681957	0.000403308	0.000407248	-0.000192546	0.000201368	8.62621e-06	0.00113308
BPH3670	-0.00453979	0.00395187	0.000254767	0.000705324	0.0005969	0.000175346	-0.000124912	0.000273513	0.000110368	0.000688711
BPH3672	-0.00495296	0.00416229	0.000251358	0.000674338	0.000445524	0.000223218	1.62701e-05	0.000272089	6.06192e-05	0.000997831
BPH3674	-0.00479816	0.00397158	0.000249967	0.000612441	0.000605522	3.40124e-05	-7.54275e-05	0.000277194	7.58328e-05	0.000631744
BPH3682	-0.00484509	0.0040437	0.0003032	0.000651109	0.000617499	9.49746e-05	-0.000177765	0.000161843	0.000147796	0.000845317
BPH3684	-0.00453711	0.00398215	0.000412348	0.000674009	0.000522981	0.000342365	-0.000210209	0.000202721	1.63831e-05	0.00108673
BPH3686	-0.00464059	0.00404383	0.000253836	0.000651597	0.000511983	0.000135759	-0.000197189	0.000258817	8.94098e-05	0.000773361
BPH3688	-0.00455832	0.0040099	0.000417435	0.000670861	0.000526332	0.000283556	-0.000270484	0.000266617	9.47567e-05	0.000795023
BPH3692	-0.00486114	0.00413042	0.00023076	0.000570225	0.000540426	2.02379e-05	-0.000215167	0.000111256	0.000222905	0.000730577
BPH3694	-0.00460814	0.00403807	0.000414454	0.000694066	0.000497952	0.000271442	-0.000175866	0.000245597	5.42857e-05	0.000805952
BPH3696	-0.00478059	0.00406583	0.000418957	0.000611913	0.000487468	1.04404e-05	-0.000125362	0.000218148	0.000150261	0.000674161
BPH3700	-0.00479118	0.00405396	0.000271617	0.000534551	0.000554862	7.90549e-05	-0.000129401	0.000209605	8.04836e-05	0.000700719
BPH3702	-0.0047892	0.00410453	0.000278994	0.000781214	0.000487115	0.000158095	-0.000156392	0.000267989	0.000124664	0.000740684
BPH3704	-0.00469487	0.00411665	0.000365456	0.000691325	0.000496474	0.000150364	-0.000255527	0.000187301	9.2318e-05	0.000787678
BPH3706	-0.00475539	0.00406743	0.000292118	0.000685372	0.000543894	0.000139539	-0.000160951	0.000190844	8.98777e-05	0.000756078
BPH3710	-0.00473714	0.00407993	0.000252591	0.000634788	0.000530357	0.000163587	-0.000166091	0.000197596	7.7178e-05	0.00074912
BPH3733	-0.000615437	-0.00532194	0.00106067	-0.00209726	-0.00430179	-0.00117796	0.000534092	0.000177578	0.000236186	-0.000177312
BPH3734	-0.0048447	-0.000546123	0.00150199	0.000366383	0.00123579	0.000682287	-0.000900635	-0.000316049	-0.000498811	0.00103717
BPH3735	-0.00563836	0.0043216	0.000686645	0.00159726	-0.0006721	-0.000554196	0.000105318	-0.000386813	-2.06049e-05	-0.000719687
BPH3736	0.0171377	0.00124165	0.00610777	0.00282068	-0.00118029	-0.00282757	0.00143527	0.0012934	0.000417045	-0.00106721
BPH3737	-0.00567256	0.00429329	0.000383355	0.00112429	-0.000188531	-3.85619e-05	-0.000270221	7.19472e-05	-0.000294318	0.000214025
BPH3738	0.0158024	0.00182859	0.00646141	0.000965184	0.00121772	0.00270511	-0.00195294	0.00179263	4.87717e-05	0.0015434
BPH3739	-0.00555037	0.00436652	0.000902647	0.00158499	-0.000730367	-0.0006131	0.000108454	-0.000342884	5.52867e-05	-0.000654084
BPH3741	-0.00554721	0.00433134	0.000629546	0.00143633	-0.000331469	-0.00020113	-9.88045e-05	-6.5752e-05	-0.000225411	-0.000132106
BPH3742	-0.0055452	0.0043375	0.000600592	0.00128105	-0.000304119	-0.000244999	-4.43499e-05	-4.23054e-05	-0.000188232	-0.000192579
BPH3743	-0.00546107	0.00430897	0.000593109	0.00124238	-0.000294665	-0.000237804	-4.37614e-05	-1.36629e-05	-0.000223879	-0.000175716
BPH3744	-0.00562338	0.00442031	0.000790328	0.00140225	-0.000361777	-0.000219874	-4.36809e-05	2.56209e-05	-0.000188925	-0.000155139
BPH3745	-0.00550084	0.00432322	0.000585504	0.00125767	-0.000297808	-0.000259919	-3.06859e-05	-3.89726e-05	-0.000228794	-0.000189296
BPH3746	-0.00195633	-0.00421701	0.000833919	-0.00163959	-3.10952e-05	0.00143966	-0.00303525	0.000439171	-0.00192717	-0.00182363
BPH3747	0.0048887	-0.00746136	-0.00641071	0.00428812	0.000320685	-0.000506057	-0.00033891	-0.000584398	-0.000133608	2.85538e-05
BPH3748	-0.00549837	0.00432169	0.000583122	0.00125358	-0.000301841	-0.000257701	-2.79269e-05	-3.81396e-05	-0.00022971	-0.000192482
BPH3749	0.00487084	-0.00738737	-0.00597227	0.00448359	0.000593881	-0.000188602	-0.000260679	-8.96591e-05	9.23458e-05	0.000274703
BPH3750	0.0048354	-0.00738512	-0.00591436	0.00457009	0.000679662	-8.99229e-05	-0.000290976	8.75735e-06	-5.64311e-06	0.000253904
BPH3751	0.00483676	-0.00743692	-0.00597173	0.00458801	0.000638383	-0.000103742	-0.000358483	-1.11516e-05	-7.11643e-05	0.000277525
BPH3752	-0.00568051	0.00428283	0.000511669	0.00133684	-0.000654614	-0.000539126	-0.000108851	-0.000279915	4.30568e-06	-0.00040684
BPH3753	-0.00480991	0.00392874	0.000169865	0.000724179	0.000609544	5.59374e-05	-0.000137993	0.000226995	4.93472e-05	0.000676767
BPH3754	0.00482236	-0.00741199	-0.00596792	0.00450935	0.000630003	-0.000128384	-0.000231678	-0.00018054	4.07145e-05	0.000149253
BPH3755	-0.00446473	0.00402384	0.000323849	0.000602172	0.00060406	0.000272875	-0.00013967	0.000302291	7.76692e-05	0.000719268
BPH3757	-0.00480293	0.00404883	0.000115472	0.00090568	0.000600571	4.64926e-05	-0.000128945	0.000154153	0.000159844	0.00076774

## Sheet: lineage effects
GWAS: lineage effects
lineage	wald_test	p_value
MDS4	6.99373	2.67675e-12
MDS3	5.28708	1.24283e-07
MDS1	3.61572	0.000299512
MDS7	3.11568	0.00183522
MDS6	2.46294	0.0137802
MDS2	1.6075	0.107944
MDS9	1.42394	0.154464
MDS5	1.20163	0.229506
MDS8	0.71964	0.471747
MDS10	0.20899	0.834456

## Sheet: mutations
mutation_id	af	p_value	beta	variant_h2	unique_gene_symbol	CHROM	POS	REF	ALT	TYPE	EFFTYPE	LOCUS_TAG	BPH2947_gene	BPH2947_product	MUTATION_SHORT	consistency_index	n_acquisitions	neb_locus_tag	neb_product	neb_gene	neb_operon_symbol
NZ_LR130515_1495542_A_G	0.0362	5.47e-06	1.63	0.229	asd	NZ_LR130515	1495542	A	G	snp	missense_variant	EW033_RS07730		aspartate-semialdehyde dehydrogenase	N25D	0.333333	3	SAUSA300_1287	aspartate semialdehyde dehydrogenase	asd	lysC-asd-dapA-dapB-dapD
NZ_LR130515_181394_T_G	0.561	7.44e-06	1.32	0.226	EW033_RS00910	NZ_LR130515	181394	T	G	snp	missense_variant	EW033_RS00910		polysaccharide biosynthesis protein	F94V	0.25	4
NZ_LR130515_1500314_C_T	0.0465	8.98e-06	1.78	0.224	alr2	NZ_LR130515	1500314	C	T	snp	missense_variant	EW033_RS07755		alanine racemase	A68V	0.333333	3	SAUSA300_1292	alanine racemase	alr2	dapI-alr2-lysA
NZ_LR130515_1505359_G_A	0.0465	8.98e-06	1.78	0.224	SAUSA300_1299	NZ_LR130515	1505359	G	A	snp	missense_variant	EW033_RS07795		toxic anion resistance protein	M93I	0.333333	3	SAUSA300_1299	putative tellurite resistance protein	SAUSA300_1299	acyP-xpaC-SAUSA300_1299
NZ_LR130515_1506200_C_A	0.0465	8.98e-06	1.78	0.224	SAUSA300_1299	NZ_LR130515	1506200	C	A	snp	missense_variant	EW033_RS07795		toxic anion resistance protein	P374T	0.333333	3	SAUSA300_1299	putative tellurite resistance protein	SAUSA300_1299	acyP-xpaC-SAUSA300_1299
NZ_LR130515_3002122_C_CTTTA	0.0284	9.59e-06	1.2	0.223	icaC	NZ_LR130515	3002122	C	CTTTA	ins	missense_variant	EW033_RS15860		acyltransferase family protein	Y290fs	0.1	10	SAUSA300_2602	intercellular adhesion protein C	icaC	icaB-icaC
NZ_LR130515_993477_C_T	0.0207	2.52e-05	1.58	0.212		NZ_LR130515	993477	C	T	snp	missense_variant	EW033_RS00100				0.5	2
NZ_LR130515_29135_TTGCGTCCTAACA_CTGTGTCTTCAACG	0.0233	3.89e-05	1.51	0.208		NZ_LR130515	29135	TTGCGTCCTAACA	CTGTGTCTTCAACG	complex	missense_variant	EW033_RS00100				0.333333	3
NZ_LR130515_534631_AACAACGA_TACGGCAT	0.0233	3.89e-05	1.51	0.208	ssl9	NZ_LR130515	534631	AACAACGA	TACGGCAT	complex	missense_variant	EW033_RS02760		superantigen-like protein SSL9	LTTI3FTAL	0.166667	6	SAUSA300_0403	superantigen-like protein	SAUSA300_0403
NZ_LR130515_1813518_T_C	0.0233	3.89e-05	1.51	0.208	dnaB	NZ_LR130515	1813518	T	C	snp	missense_variant	EW033_RS09300		helicase DnaB	T329A	0.5	2	SAUSA300_1631	replication initiation and membrane attachment protein	SAUSA300_1631	dnaI-dnaB-nrdR
NZ_LR130515_2358184_T_A	0.0233	3.89e-05	1.51	0.208	kdpE	NZ_LR130515	2358184	T	A	snp	missense_variant	EW033_RS12485		response regulator transcription factor	H167Q	0.5	2	SAUSA300_2036	DNA-binding response regulator, KdpE	kdpE	kdpD-kdpE
NZ_LR130515_2370102_G_A	0.0233	3.89e-05	1.51	0.208	thiE	NZ_LR130515	2370102	G	A	snp	missense_variant	EW033_RS12555		thiamine phosphate synthase	H143Y	0.5	2	SAUSA300_2047	thiamine-phosphate pyrophosphorylase	thiE	thiE-thiM-thiD-tenA
NZ_LR130515_2711842_TGCT_CGCC	0.0233	3.89e-05	1.51	0.208	SAUSA300_2375	NZ_LR130515	2711842	TGCT	CGCC	complex	missense_variant	EW033_RS14430		ABC transporter ATP-binding protein	ST201GA	0.25	4	SAUSA300_2375	ABC transporter ATP-binding/permease	SAUSA300_2375	SAUSA300_2374-SAUSA300_2375
NZ_LR130515_2176670_G_A	0.0103	3.97e-05	-1.94	0.207		NZ_LR130515	2176670	G	A	snp	missense_variant	EW033_RS00100				0.5	2
NZ_LR130515_2587098_TATTTTTTATC_T	0.0568	4.74e-05	1.28	0.205		NZ_LR130515	2587098	TATTTTTTATC	T	del	missense_variant	EW033_RS13760-EW033_RS13765				0.5	2
NZ_LR130515_1493776_T_GTATGGAG	0.0491	5.19e-05	1.42	0.204		NZ_LR130515	1493776	T	GTATGGAG	complex	missense_variant	EW033_RS00100				0.0909091	11
NZ_LR130515_1430846_TA_T	0.0181	6.32e-05	-1.44	0.202	guaC	NZ_LR130515	1430846	TA	T	del	missense_variant	EW033_RS07420	guaC	GMP reductase	M273fs	0.5	2	SAUSA300_1235	guanosine 5'-monophosphate oxidoreductase	guaC
NZ_LR130515_1494030_A_G	0.416	6.6e-05	1.08	0.201		NZ_LR130515	1494030	A	G	snp	missense_variant	EW033_RS00100				0.125	8
NZ_LR130515_560340_GT_G	0.0284	7.7e-05	-1.4	0.2		NZ_LR130515	560340	GT	G	del	missense_variant	EW033_RS00100				0.2	5
NZ_LR130515_586651_A_G	0.0258	9.52e-05	1.32	0.197	EW033_RS03030	NZ_LR130515	586651	A	G	snp	missense_variant	EW033_RS03030		hypothetical protein	I29M	0.5	2
NZ_LR130515_1505707_A_T	0.0517	0.000103	1.41	0.196	SAUSA300_1299	NZ_LR130515	1505707	A	T	snp	missense_variant	EW033_RS07795		toxic anion resistance protein	Q209H	0.25	4	SAUSA300_1299	putative tellurite resistance protein	SAUSA300_1299	acyP-xpaC-SAUSA300_1299
NZ_LR130515_313738_C_CT	0.0103	0.000106	1.69	0.196		NZ_LR130515	313738	C	CT	ins	missense_variant	EW033_RS00100				0.25	4
NZ_LR130515_889965_T_TA	0.0103	0.000106	1.69	0.196	comFA	NZ_LR130515	889965	T	TA	ins	missense_variant	EW033_RS04615		DEAD/DEAH box helicase	E344fs	0.5	2	SAUSA300_0734	putative comf operon protein 1	SAUSA300_0734	comFA-comFC-saHPF
NZ_LR130515_1300557_T_C	0.0103	0.000106	1.69	0.196		NZ_LR130515	1300557	T	C	snp	missense_variant	EW033_RS00100				0.5	2
NZ_LR130515_2626304_ATA_GTT	0.0103	0.000106	1.69	0.196		NZ_LR130515	2626304	ATA	GTT	complex	missense_variant	EW033_RS13970-EW033_RS13975				0.5	2
NZ_LR130515_2741084_G_A	0.0103	0.000106	1.69	0.196		NZ_LR130515	2741084	G	A	snp	missense_variant	EW033_RS14575-EW033_RS14580				0.333333	3
NZ_LR130515_2760467_G_GT	0.0103	0.000106	1.69	0.196		NZ_LR130515	2760467	G	GT	ins	missense_variant	EW033_RS14675-EW033_RS14680				0.0909091	11
NZ_LR130515_2855770_G_A	0.0103	0.000106	1.69	0.196	SAUSA300_2497	NZ_LR130515	2855770	G	A	snp	missense_variant	EW033_RS15155		aminotransferase class I/II-fold pyridoxal phosphate-dependent enzyme	Q368*	0.25	4	SAUSA300_2497	aminotransferase, class I	SAUSA300_2497	SAUSA300_2496-SAUSA300_2497
NZ_LR130515_2875155_C_A	0.0103	0.000106	1.69	0.196	SAUSA300_2517	NZ_LR130515	2875155	C	A	snp	missense_variant	EW033_RS15250		amidohydrolase	A285E	0.333333	3	SAUSA300_2517	amidohydrolase family protein	SAUSA300_2517	gbaA-gbaB-SAUSA300_2517-SAUSA300_2518
NZ_LR130515_153489_ATA_GCG	0.199	0.000118	1.03	0.194		NZ_LR130515	153489	ATA	GCG	complex	missense_variant	EW033_RS00100				0.25	4
NZ_LR130515_2037888_TACC_T	0.0155	0.000137	1.4	0.193	SAUSA300_1847	NZ_LR130515	2037888	TACC	T	del	missense_variant	EW033_RS10580		SAV1866 family putative multidrug efflux ABC transporter	G379del	0.5	2	SAUSA300_1847	hypothetical protein	SAUSA300_1847
NZ_LR130515_1487206_A_T	0.0517	0.000141	1.39	0.192	pstA	NZ_LR130515	1487206	A	T	snp	missense_variant	EW033_RS07695	pstA	phosphate ABC transporter permease PstA	L138I	0.25	4	SAUSA300_1281	phosphate ABC transporter permease PstA	pstA	phoU-pstB-pstA-pstC
NZ_LR130515_1494957_A_G	0.0517	0.000141	1.39	0.192	lysC	NZ_LR130515	1494957	A	G	snp	missense_variant	EW033_RS07725		aspartate kinase	T253A	0.25	4	SAUSA300_1286	aspartate kinase	SAUSA300_1286	lysC-asd-dapA-dapB-dapD
NZ_LR130515_1495494_G_T	0.0517	0.000141	1.39	0.192	asd	NZ_LR130515	1495494	G	T	snp	missense_variant	EW033_RS07730		aspartate-semialdehyde dehydrogenase	A9S	0.25	4	SAUSA300_1287	aspartate semialdehyde dehydrogenase	asd	lysC-asd-dapA-dapB-dapD
NZ_LR130515_182721_T_A	0.563	0.000152	1.15	0.191	EW033_RS00910	NZ_LR130515	182721	T	A	snp	missense_variant	EW033_RS00910		polysaccharide biosynthesis protein	F536Y	0.333333	3
NZ_LR130515_184908_A_G	0.563	0.000152	1.15	0.191	capF	NZ_LR130515	184908	A	G	snp	missense_variant	EW033_RS00920		capsular polysaccharide biosynthesis protein CapF	N314D	0.333333	3	SAUSA300_0157	capsular polysaccharide biosynthesis protein Cap5F	cap5F	capA-capB-capC-capD-capE-capF-capG-capH-capI-capJ-capK-capL-capM-capN-capO-capP
NZ_LR130515_602691_G_C	0.0413	0.000171	1.4	0.19		NZ_LR130515	602691	G	C	snp	missense_variant	EW033_RS00100				0.5	2
NZ_LR130515_1538848_ATTTGTCGAGT_CTTTATCAAGC	0.0413	0.000171	1.4	0.19	ebh	NZ_LR130515	1538848	ATTTGTCGAGT	CTTTATCAAGC	complex	missense_variant	EW033_RS07955	ebh	hyperosmolarity resistance protein Ebh	S8876A	0.5	2	SAUSA300_1327	cell surface protein	SAUSA300_1327
NZ_LR130515_153489_AT_GC	0.0155	0.000191	-1.53	0.189		NZ_LR130515	153489	AT	GC	complex	missense_variant	EW033_RS00100				0.25	4
NZ_LR130515_1866750_TG_CA	0.0155	0.000191	-1.53	0.189	ptaA	NZ_LR130515	1866750	TG	CA	mnp	missense_variant	EW033_RS09535		PTS transporter subunit EIIC	P347L	0.166667	6	SAUSA300_1672	phosphotransferase system, N-acetylglucosamine-specific IIBC component	nagE
NZ_LR130515_2094544_T_TTTA	0.0155	0.000191	-1.53	0.189		NZ_LR130515	2094544	T	TTTA	ins	missense_variant	EW033_RS00100				0.333333	3
NZ_LR130515_2572128_C_T	0.0155	0.000191	-1.53	0.189		NZ_LR130515	2572128	C	T	snp	missense_variant	EW033_RS13690-EW033_RS13695				0.5	2
NZ_LR130515_2677685_G_C	0.0155	0.000191	-1.53	0.189	narG	NZ_LR130515	2677685	G	C	snp	missense_variant	EW033_RS14225		nitrate reductase subunit alpha	T120S	0.5	2	SAUSA300_2343	respiratory nitrate reductase, alpha subunit	SAUSA300_2343	nreC-nreB-nreA-narI-narJ-narH-narG
NZ_LR130515_2747584_ACCTC_CCCTT	0.0155	0.000191	-1.53	0.189		NZ_LR130515	2747584	ACCTC	CCCTT	complex	missense_variant	EW033_RS14615-EW033_RS14620				0.2	5
NZ_LR130515_2747593_C_CAA	0.0155	0.000191	-1.53	0.189		NZ_LR130515	2747593	C	CAA	ins	missense_variant	EW033_RS14615-EW033_RS14620				0.25	4
NZ_LR130515_2719714_A_G	0.0155	0.000201	-1.47	0.188		NZ_LR130515	2719714	A	G	snp	missense_variant	EW033_RS14475-EW033_RS14480				0.5	2
NZ_LR130515_2731054_T_C	0.0284	0.000209	1.24	0.187		NZ_LR130515	2731054	T	C	snp	missense_variant	EW033_RS14525-EW033_RS14530				0.5	2
NZ_LR130515_3012845_A_G	0.109	0.000226	-1.53	0.186		NZ_LR130515	3012845	A	G	snp	missense_variant	EW033_RS15915-EW033_RS15920				0.333333	3
NZ_LR130515_1497496_G_A	0.496	0.000248	0.841	0.185	dapB	NZ_LR130515	1497496	G	A	snp	missense_variant	EW033_RS07740		4-hydroxy-tetrahydrodipicolinate reductase	G51D	0.25	4	SAUSA300_1289	dihydrodipicolinate reductase	dapB	lysC-asd-dapA-dapB-dapD
NZ_LR130515_3036296_C_T	0.0181	0.000269	-1.64	0.184	SAUSA300_2635	NZ_LR130515	3036296	C	T	snp	missense_variant	EW033_RS16020	vraH	peptide resistance ABC transporter activity modulator VraH	A46V	0.333333	3	SAUSA300_2635	hypothetical protein	SAUSA300_2635	vraD-vraE-SAUSA300_2635-SAUSA300_2636
NZ_LR130515_2961221_G_A	0.0956	0.000278	-1.7	0.184	SAUSA300_2575	NZ_LR130515	2961221	G	A	snp	missense_variant	EW033_RS15710		BglG family transcription antiterminator	V122I	0.5	2	SAUSA300_2575	BglG family transcriptional antiterminator	SAUSA300_2575	SAUSA300_2575-manP-pmi
NZ_LR130515_2961914_A_G	0.0956	0.000278	-1.7	0.184	SAUSA300_2575	NZ_LR130515	2961914	A	G	snp	missense_variant	EW033_RS15710		BglG family transcription antiterminator	I353V	0.5	2	SAUSA300_2575	BglG family transcriptional antiterminator	SAUSA300_2575	SAUSA300_2575-manP-pmi
NZ_LR130515_2962260_TACACG_GACATA	0.0956	0.000278	-1.7	0.184	SAUSA300_2575	NZ_LR130515	2962260	TACACG	GACATA	complex	missense_variant	EW033_RS15710		BglG family transcription antiterminator	IHV468RHI	0.25	4	SAUSA300_2575	BglG family transcriptional antiterminator	SAUSA300_2575	SAUSA300_2575-manP-pmi
NZ_LR130515_2983712_A_T	0.0956	0.000278	-1.7	0.184	secY2	NZ_LR130515	2983712	A	T	snp	missense_variant	EW033_RS15775		accessory Sec system protein translocase subunit SecY2	D270E	0.2	5	SAUSA300_2588	preprotein translocase subunit SecY	secY	gtfB-gtfA-secA2-asp3-asp2-asp1-secY2
NZ_LR130515_2747584_A_C	0.121	0.000282	1.12	0.184		NZ_LR130515	2747584	A	C	snp	missense_variant	EW033_RS14615-EW033_RS14620				0.2	5
NZ_LR130515_1494226_T_A	0.0388	0.000285	1.33	0.183	lysC	NZ_LR130515	1494226	T	A	snp	missense_variant	EW033_RS07725		aspartate kinase	F9Y	0.333333	3	SAUSA300_1286	aspartate kinase	SAUSA300_1286	lysC-asd-dapA-dapB-dapD
NZ_LR130515_186027_A_G	0.558	0.000298	1.09	0.183	capG	NZ_LR130515	186027	A	G	snp	missense_variant	EW033_RS00925		UDP-N-acetylglucosamine 2-epimerase (non-hydrolyzing)	I316V	0.333333	3	SAUSA300_0158	capsular polysaccharide biosynthesis protein Cap5G	cap5G	capA-capB-capC-capD-capE-capF-capG-capH-capI-capJ-capK-capL-capM-capN-capO-capP
NZ_LR130515_2948152_TGAC_GGAG	0.0233	0.000363	-1.36	0.18	clfB	NZ_LR130515	2948152	TGAC	GGAG	complex	missense_variant	EW033_RS15655	clfB	MSCRAMM family adhesin clumping factor ClfB	E732D	0.0526316	19	SAUSA300_2565	clumping factor B	clfB
NZ_LR130515_1538068_C_T	0.0155	0.000364	-1.4	0.18	ebh	NZ_LR130515	1538068	C	T	snp	missense_variant	EW033_RS07955	ebh	hyperosmolarity resistance protein Ebh	A9136T	0.5	2	SAUSA300_1327	cell surface protein	SAUSA300_1327
NZ_LR130515_1493849_A_C	0.775	0.000377	0.577	0.18		NZ_LR130515	1493849	A	C	snp	missense_variant	EW033_RS00100				0.125	8
NZ_LR130515_2747593_C_AA	0.116	0.000408	1.1	0.179		NZ_LR130515	2747593	C	AA	complex	missense_variant	EW033_RS14615-EW033_RS14620				0.25	4
NZ_LR130515_182776_AA_GG	0.354	0.00042	0.859	0.178	EW033_RS00910	NZ_LR130515	182776	AA	GG	complex	missense_variant	EW033_RS00910		polysaccharide biosynthesis protein	I555V	0.125	8
NZ_LR130515_1399349_GT_G	0.0181	0.000423	-1.26	0.178	bsaA	NZ_LR130515	1399349	GT	G	del	missense_variant	EW033_RS07235		glutathione peroxidase	K146fs	0.333333	3	SAUSA300_1197	glutathione peroxidase	SAUSA300_1197
NZ_LR130515_182239_C_G	0.0465	0.000457	1.14	0.177	EW033_RS00910	NZ_LR130515	182239	C	G	snp	missense_variant	EW033_RS00910		polysaccharide biosynthesis protein	D375E	0.333333	3
NZ_LR130515_21033_CGGTA_GGGTG	0.0129	0.000469	-1.53	0.177	dnaC	NZ_LR130515	21033	CGGTA	GGGTG	complex	missense_variant	EW033_RS00085	dnaB	replicative DNA helicase	T268A	0.25	4	SAUSA300_0016	replicative DNA helicase	dnaB	SAUSA300_0013-gdpP-rplI-dnaC
NZ_LR130515_814088_G_GA	0.0129	0.000469	-1.53	0.177	SAUSA300_0665	NZ_LR130515	814088	G	GA	ins	missense_variant	EW033_RS04230		GNAT family N-acetyltransferase	L178fs	0.5	2	SAUSA300_0665	acetyltransferase	SAUSA300_0665
NZ_LR130515_1584917_AT_GC	0.0129	0.000469	-1.53	0.177		NZ_LR130515	1584917	AT	GC	mnp	missense_variant	EW033_RS00100				0.25	4
NZ_LR130515_1890644_G_A	0.0129	0.000469	-1.53	0.177	ftsK	NZ_LR130515	1890644	G	A	snp	missense_variant	EW033_RS09630		DNA translocase FtsK	P530S	0.5	2	SAUSA300_1687	FtsK/SpoIIIE family protein	SAUSA300_1687	murC-ftsK-SAUSA300_1688-SAUSA300_1689-SAUSA300_1690-SAUSA300_1691
NZ_LR130515_1485105_A_G	0.222	0.00048	0.982	0.177		NZ_LR130515	1485105	A	G	snp	missense_variant	EW033_RS00100				0.166667	6
NZ_LR130515_185777_T_G	0.561	0.000496	1	0.176	capG	NZ_LR130515	185777	T	G	snp	missense_variant	EW033_RS00925		UDP-N-acetylglucosamine 2-epimerase (non-hydrolyzing)	I232M	0.333333	3	SAUSA300_0158	capsular polysaccharide biosynthesis protein Cap5G	cap5G	capA-capB-capC-capD-capE-capF-capG-capH-capI-capJ-capK-capL-capM-capN-capO-capP
NZ_LR130515_1496195_C_A	0.163	0.000501	1.08	0.176	asd	NZ_LR130515	1496195	C	A	snp	missense_variant	EW033_RS07730		aspartate-semialdehyde dehydrogenase	D242E	0.166667	6	SAUSA300_1287	aspartate semialdehyde dehydrogenase	asd	lysC-asd-dapA-dapB-dapD
NZ_LR130515_2950337_C_CT	0.78	0.000508	0.576	0.176	clfB	NZ_LR130515	2950337	C	CT	ins	missense_variant	EW033_RS15655	clfB	MSCRAMM family adhesin clumping factor ClfB	R5fs	0.2	5	SAUSA300_2565	clumping factor B	clfB
NZ_LR130515_1005426_T_A	0.783	0.000546	0.581	0.175	mnhD	NZ_LR130515	1005426	T	A	snp	missense_variant	EW033_RS05305		Na+/H+ antiporter subunit D	N104I	0.142857	7	SAUSA300_0852	putative monovalent cation/H+ antiporter subunit D	mnhD	mnhG-mnhF-mnhE-mnhD-mnhC-mnhB-mnhA
NZ_LR130515_1483817_T_G	0.0801	0.000641	1.09	0.173	SAUSA300_1278	NZ_LR130515	1483817	T	G	snp	missense_variant	EW033_RS07680	pepF	oligoendopeptidase F	D206E	0.2	5	SAUSA300_1278	oligoendopeptidase F	pepF
NZ_LR130515_134710_CTTGTTGCCATCTTCTTTA_TTTGTTGTTGTCTTCTTTG	0.0103	0.000652	1.6	0.173	EW033_RS00690	NZ_LR130515	134710	CTTGTTGCCATCTTCTTTA	TTTGTTGTTGTCTTCTTTG	complex	missense_variant	EW033_RS00690	spa	staphylococcal protein A	G321N	0.2	5
NZ_LR130515_1494471_A_G	0.587	0.000706	1.12	0.171	lysC	NZ_LR130515	1494471	A	G	snp	missense_variant	EW033_RS07725		aspartate kinase	M91V	0.25	4	SAUSA300_1286	aspartate kinase	SAUSA300_1286	lysC-asd-dapA-dapB-dapD
NZ_LR130515_2436217_G_A	0.0362	0.000721	1.14	0.171	fmtB	NZ_LR130515	2436217	G	A	snp	missense_variant	EW033_RS12905		DUF1542 domain-containing protein	A2327V	0.5	2	SAUSA300_2109	truncated FmtB protein	fmtB
NZ_LR130515_1485083_GT_G	0.0904	0.000738	0.951	0.171		NZ_LR130515	1485083	GT	G	del	missense_variant	EW033_RS00100				0.0909091	11
NZ_LR130515_1496521_G_A	0.0594	0.000747	1.12	0.171	dapA	NZ_LR130515	1496521	G	A	snp	missense_variant	EW033_RS07735		4-hydroxy-tetrahydrodipicolinate synthase	V21I	0.2	5	SAUSA300_1288	dihydrodipicolinate synthase	dapA	lysC-asd-dapA-dapB-dapD
NZ_LR130515_2956514_TA_T	0.793	0.000747	0.517	0.171	EW033_RS15685	NZ_LR130515	2956514	TA	T	del	missense_variant	EW033_RS15685		hypothetical protein	F29fs	0.125	8
NZ_LR130515_184528_A_C	0.442	0.000949	0.995	0.167	capF	NZ_LR130515	184528	A	C	snp	missense_variant	EW033_RS00920		capsular polysaccharide biosynthesis protein CapF	N187T	0.333333	3	SAUSA300_0157	capsular polysaccharide biosynthesis protein Cap5F	cap5F	capA-capB-capC-capD-capE-capF-capG-capH-capI-capJ-capK-capL-capM-capN-capO-capP
NZ_LR130515_1030483_T_C	0.786	0.000989	0.574	0.167		NZ_LR130515	1030483	T	C	snp	missense_variant	EW033_RS00100				0.166667	6
NZ_LR130515_2997672_G_A	0.0129	0.000991	-1.5	0.167		NZ_LR130515	2997672	G	A	snp	missense_variant	EW033_RS15835-EW033_RS15840				0.333333	3
NZ_LR130515_175963_G_T	0.031	0.001	0.86	0.167		NZ_LR130515	175963	G	T	snp	missense_variant	EW033_RS00100				0.166667	6
NZ_LR130515_880130_A_G	0.0258	0.00108	0.938	0.165		NZ_LR130515	880130	A	G	snp	missense_variant	EW033_RS00100				0.5	2
NZ_LR130515_114428_A_G	0.0904	0.00116	-1.23	0.165		NZ_LR130515	114428	A	G	snp	missense_variant	EW033_RS00100				0.333333	3
NZ_LR130515_185856_C_A	0.0594	0.00117	1.01	0.164	capG	NZ_LR130515	185856	C	A	snp	missense_variant	EW033_RS00925		UDP-N-acetylglucosamine 2-epimerase (non-hydrolyzing)	Q259K	0.333333	3	SAUSA300_0158	capsular polysaccharide biosynthesis protein Cap5G	cap5G	capA-capB-capC-capD-capE-capF-capG-capH-capI-capJ-capK-capL-capM-capN-capO-capP
NZ_LR130515_3012915_A_CT	0.0103	0.00117	-1.57	0.164		NZ_LR130515	3012915	A	CT	complex	missense_variant	EW033_RS15915-EW033_RS15920				0.25	4
NZ_LR130515_8269_A_G	0.0207	0.00129	-1.54	0.163	gyrA	NZ_LR130515	8269	A	G	snp	missense_variant	EW033_RS00030	gyrA	DNA gyrase subunit A	E594G	0.5	2	SAUSA300_0006	DNA gyrase subunit A	gyrA	SAUSA300_0003-recF-gyrB-gyrA
NZ_LR130515_29138_CGTCCTAACA_TGTCTCCAACG	0.0207	0.00129	-1.54	0.163		NZ_LR130515	29138	CGTCCTAACA	TGTCTCCAACG	complex	missense_variant	EW033_RS00100				0.333333	3
NZ_LR130515_119779_C_T	0.0207	0.00129	-1.54	0.163	SAUSA300_0098	NZ_LR130515	119779	C	T	snp	missense_variant	EW033_RS00640		hypothetical protein	A117V	0.5	2	SAUSA300_0098	hypothetical protein	SAUSA300_0098
NZ_LR130515_119886_T_A	0.0207	0.00129	-1.54	0.163	SAUSA300_0098	NZ_LR130515	119886	T	A	snp	missense_variant	EW033_RS00640		hypothetical protein	C153S	0.5	2	SAUSA300_0098	hypothetical protein	SAUSA300_0098
NZ_LR130515_124342_G_A	0.0207	0.00129	-1.54	0.163	SAUSA300_0104	NZ_LR130515	124342	G	A	snp	missense_variant	EW033_RS00655		helix-turn-helix domain-containing protein	V706M	0.2	5	SAUSA300_0104	AraC family transcriptional regulator	SAUSA300_0104
NZ_LR130515_127332_TA_T	0.0207	0.00129	-1.54	0.163		NZ_LR130515	127332	TA	T	del	missense_variant	EW033_RS00100				0.5	2
NZ_LR130515_2979110_GCTAT_ACTAA	0.0207	0.00129	-1.54	0.163	secA2	NZ_LR130515	2979110	GCTAT	ACTAA	complex	missense_variant	EW033_RS15755	secA2	accessory Sec system translocase SecA2	IA50LV	0.5	2	SAUSA300_2584	preprotein translocase subunit SecA	SAUSA300_2584	gtfB-gtfA-secA2-asp3-asp2-asp1-secY2
NZ_LR130515_2991274_G_A	0.0207	0.00129	-1.54	0.163		NZ_LR130515	2991274	G	A	snp	missense_variant	EW033_RS15785-EW033_RS15790				0.5	2
NZ_LR130515_2997602_TATG_CATA	0.0207	0.00129	-1.54	0.163		NZ_LR130515	2997602	TATG	CATA	complex	missense_variant	EW033_RS15835-EW033_RS15840				0.166667	6
NZ_LR130515_2997623_T_C	0.0207	0.00129	-1.54	0.163		NZ_LR130515	2997623	T	C	snp	missense_variant	EW033_RS15835-EW033_RS15840				0.5	2
NZ_LR130515_3010424_AACGTG_GACATA	0.0207	0.00129	-1.54	0.163	hisD	NZ_LR130515	3010424	AACGTG	GACATA	complex	missense_variant	EW033_RS15905		histidinol dehydrogenase	H306Y	0.5	2	SAUSA300_2611	histidinol dehydrogenase	hisD	hisI-hisF-hisA-hisH-hisB-SAUSA300_2610-hisD-hisG-hisZ
NZ_LR130515_3012122_T_A	0.0207	0.00129	-1.54	0.163	hisZ	NZ_LR130515	3012122	T	A	snp	missense_variant	EW033_RS15915		ATP phosphoribosyltransferase regulatory subunit	K222N	0.5	2	SAUSA300_2613	ATP phosphoribosyltransferase regulatory subunit	hisZ	hisI-hisF-hisA-hisH-hisB-SAUSA300_2610-hisD-hisG-hisZ
NZ_LR130515_3012840_T_C	0.0207	0.00129	-1.54	0.163		NZ_LR130515	3012840	T	C	snp	missense_variant	EW033_RS15915-EW033_RS15920				0.333333	3
NZ_LR130515_3023273_G_A	0.0207	0.00129	-1.54	0.163	bstA	NZ_LR130515	3023273	G	A	snp	missense_variant	EW033_RS15970	bstA	bacillithiol transferase BstA	S88N	0.5	2	SAUSA300_2626	hypothetical protein	SAUSA300_2626
NZ_LR130515_3030127_A_T	0.0207	0.00129	-1.54	0.163		NZ_LR130515	3030127	A	T	snp	missense_variant	EW033_RS15990-EW033_RS15995				0.5	2
NZ_LR130515_1503192_T_C	0.276	0.00135	0.892	0.162		NZ_LR130515	1503192	T	C	snp	missense_variant	EW033_RS00100				0.142857	7
NZ_LR130515_1584917_A_G	0.147	0.00142	0.935	0.162		NZ_LR130515	1584917	A	G	snp	missense_variant	EW033_RS00100				0.25	4
NZ_LR130515_2414138_C_T	0.0517	0.00145	0.912	0.161		NZ_LR130515	2414138	C	T	snp	missense_variant	EW033_RS00100				0.1	10
NZ_LR130515_182751_A_T	0.558	0.00146	0.892	0.161	EW033_RS00910	NZ_LR130515	182751	A	T	snp	missense_variant	EW033_RS00910		polysaccharide biosynthesis protein	Y546F	0.25	4
NZ_LR130515_1589925_G_A	0.0155	0.00149	-1.25	0.161	dinG	NZ_LR130515	1589925	G	A	snp	missense_variant	EW033_RS08065		ATP-dependent helicase	A488V	0.5	2	SAUSA300_1346	DnaQ family exonuclease/DinG family helicase	SAUSA300_1346	dinG-birA-papS-bshA
NZ_LR130515_2862924_CATTTAT_C	0.545	0.00152	0.799	0.161		NZ_LR130515	2862924	CATTTAT	C	del	missense_variant	EW033_RS15180-EW033_RS15185				0.125	8
NZ_LR130515_469717_AT_A	0.0155	0.0016	-1.29	0.16	selX	NZ_LR130515	469717	AT	A	del	missense_variant	EW033_RS02390		toxin	Y5fs	0.5	2	SAUSA300_0370	putative enterotoxin	SAUSA300_0370
NZ_LR130515_1999003_AA_TT	0.031	0.00162	-1.1	0.16	EW033_RS10255	NZ_LR130515	1999003	AA	TT	complex	missense_variant	EW033_RS10255		hypothetical protein	K27L	0.25	4
NZ_LR130515_979009_A_C	0.0853	0.00178	-1.84	0.158		NZ_LR130515	979009	A	C	snp	missense_variant	EW033_RS00100				0.5	2
NZ_LR130515_999775_G_T	0.0853	0.00178	-1.84	0.158		NZ_LR130515	999775	G	T	snp	missense_variant	EW033_RS00100				0.5	2
NZ_LR130515_1829481_A_G	0.158	0.00178	1.1	0.158		NZ_LR130515	1829481	A	G	snp	missense_variant	EW033_RS00100				0.5	2
NZ_LR130515_2063834_ATTCATTTTCTGAATCATTGATCTGCGTTTT_A	0.0258	0.00185	0.895	0.158	EW033_RS10740	NZ_LR130515	2063834	ATTCATTTTCTGAATCATTGATCTGCGTTTT	A	del	missense_variant	EW033_RS10740		hypothetical protein	K13_E22del	0.5	2
NZ_LR130515_184455_A_G	0.483	0.00192	0.852	0.157	capF	NZ_LR130515	184455	A	G	snp	missense_variant	EW033_RS00920		capsular polysaccharide biosynthesis protein CapF	N163D	0.25	4	SAUSA300_0157	capsular polysaccharide biosynthesis protein Cap5F	cap5F	capA-capB-capC-capD-capE-capF-capG-capH-capI-capJ-capK-capL-capM-capN-capO-capP
NZ_LR130515_2973316_C_T	0.3	0.0022	0.534	0.155	sasF	NZ_LR130515	2973316	C	T	snp	missense_variant	EW033_RS15740	sasF	cell-wall-anchored protein SasF	G146D	0.25	4	SAUSA300_2581	putative surface anchored protein	SAUSA300_2581
NZ_LR130515_1609289_C_T	0.63	0.00226	0.506	0.155		NZ_LR130515	1609289	C	T	snp	missense_variant	EW033_RS00100				0.25	4
NZ_LR130515_1402528_T_C	0.475	0.00233	0.47	0.154		NZ_LR130515	1402528	T	C	snp	missense_variant	EW033_RS00100				0.0714286	14
NZ_LR130515_2987131_GTCCGAGGTGCTAG_TTCTGATGTACTAA	0.093	0.00236	-1.26	0.154	sasA	NZ_LR130515	2987131	GTCCGAGGTGCTAG	TTCTGATGTACTAA	complex	missense_variant	EW033_RS15780	sasA	serine-rich repeat glycoprotein adhesin SasA	ASTSD929VSTSE	0.25	4	SAUSA300_2589	cell wall anchor domain-containing protein	SAUSA300_2589
NZ_LR130515_1478782_A_T	0.45	0.0024	0.792	0.154	SAUSA300_1272	NZ_LR130515	1478782	A	T	snp	missense_variant	EW033_RS07645		SWIM zinc finger family protein	I60K	0.142857	7	SAUSA300_1272	hypothetical protein	SAUSA300_1272
NZ_LR130515_2814070_C_T	0.114	0.00241	0.965	0.154		NZ_LR130515	2814070	C	T	snp	missense_variant	EW033_RS14940-EW033_RS14945				0.25	4
NZ_LR130515_6738_TT_GC	0.0129	0.00243	1.19	0.154	gyrA	NZ_LR130515	6738	TT	GC	complex	missense_variant	EW033_RS00030	gyrA	DNA gyrase subunit A	L84A	0.5	2	SAUSA300_0006	DNA gyrase subunit A	gyrA	SAUSA300_0003-recF-gyrB-gyrA
NZ_LR130515_1496202_ACAACA_GCGACT	0.284	0.00243	0.855	0.154	asd	NZ_LR130515	1496202	ACAACA	GCGACT	complex	missense_variant	EW033_RS07730		aspartate-semialdehyde dehydrogenase	T245A	0.125	8	SAUSA300_1287	aspartate semialdehyde dehydrogenase	asd	lysC-asd-dapA-dapB-dapD
NZ_LR130515_2988728_TA_GT	0.093	0.00243	-1.27	0.154	sasA	NZ_LR130515	2988728	TA	GT	mnp	missense_variant	EW033_RS15780	sasA	serine-rich repeat glycoprotein adhesin SasA	Y401T	0.333333	3	SAUSA300_2589	cell wall anchor domain-containing protein	SAUSA300_2589
NZ_LR130515_2989278_TGGC_GGGT	0.093	0.00243	-1.27	0.154	sasA	NZ_LR130515	2989278	TGGC	GGGT	complex	missense_variant	EW033_RS15780	sasA	serine-rich repeat glycoprotein adhesin SasA	AN217TH	0.25	4	SAUSA300_2589	cell wall anchor domain-containing protein	SAUSA300_2589
NZ_LR130515_21666_G_A	0.0982	0.00246	-1.27	0.153		NZ_LR130515	21666	G	A	snp	missense_variant	EW033_RS00085-EW033_RS00095				0.333333	3
NZ_LR130515_182178_T_C	0.295	0.00253	0.746	0.153	EW033_RS00910	NZ_LR130515	182178	T	C	snp	missense_variant	EW033_RS00910		polysaccharide biosynthesis protein	M355T	0.125	8
NZ_LR130515_2527624_TTC_GTG	0.0155	0.00267	-1.18	0.152	rplD	NZ_LR130515	2527624	TTC	GTG	complex	missense_variant	EW033_RS13420	rplD	50S ribosomal protein L4	GT69AP	0.5	2	SAUSA300_2203	50S ribosomal protein L4	rplD	adk-secY-rplO-rpmD-rpsE-rplR-rplF-rpsH-rpsN-rplE-rplX-rplN-rpsQ-rpmC-rplP-rpsC-rplV-rpsS-rplB-rplW-rplD-rplC-rpsJ
NZ_LR130515_1497313_A_G	0.566	0.00274	0.945	0.152	dapA	NZ_LR130515	1497313	A	G	snp	missense_variant	EW033_RS07735		4-hydroxy-tetrahydrodipicolinate synthase	T285A	0.25	4	SAUSA300_1288	dihydrodipicolinate synthase	dapA	lysC-asd-dapA-dapB-dapD
NZ_LR130515_3028187_T_C	0.093	0.00278	-1.53	0.152		NZ_LR130515	3028187	T	C	snp	missense_variant	EW033_RS15980-EW033_RS15985				0.111111	9
NZ_LR130515_1635302_A_G	0.553	0.00283	0.492	0.151	SAUSA300_1451	NZ_LR130515	1635302	A	G	snp	missense_variant	EW033_RS08325		SDR family oxidoreductase	Y226H	0.166667	6	SAUSA300_1451	short chain dehydrogenase/reductase family oxidoreductase	SAUSA300_1451
NZ_LR130515_2618872_TGT_GGTA	0.158	0.00291	1.23	0.151		NZ_LR130515	2618872	TGT	GGTA	complex	missense_variant	EW033_RS13925-EW033_RS13930				0.2	5
NZ_LR130515_2988629_T_G	0.116	0.00293	-0.969	0.151	sasA	NZ_LR130515	2988629	T	G	snp	missense_variant	EW033_RS15780	sasA	serine-rich repeat glycoprotein adhesin SasA	N434T	0.2	5	SAUSA300_2589	cell wall anchor domain-containing protein	SAUSA300_2589
NZ_LR130515_2988642_C_T	0.116	0.00293	-0.969	0.151	sasA	NZ_LR130515	2988642	C	T	snp	missense_variant	EW033_RS15780	sasA	serine-rich repeat glycoprotein adhesin SasA	D430N	0.2	5	SAUSA300_2589	cell wall anchor domain-containing protein	SAUSA300_2589
NZ_LR130515_884202_C_A	0.0103	0.00305	-1.43	0.15		NZ_LR130515	884202	C	A	snp	missense_variant	EW033_RS00100				0.5	2
NZ_LR130515_127156_T_C	0.217	0.00308	-1.05	0.15		NZ_LR130515	127156	T	C	snp	missense_variant	EW033_RS00100				0.333333	3
NZ_LR130515_1944302_C_A	0.0129	0.00319	1.18	0.15	pckA	NZ_LR130515	1944302	C	A	snp	missense_variant	EW033_RS09880	pckA	phosphoenolpyruvate carboxykinase (ATP)	P19T	0.333333	3	SAUSA300_1731	phosphoenolpyruvate carboxykinase	pckA
NZ_LR130515_2318007_G_GA	0.0129	0.00323	1.15	0.149	SAUSA300_2001	NZ_LR130515	2318007	G	GA	ins	missense_variant	EW033_RS12285		MutS family DNA mismatch repair protein	N131fs	0.5	2	SAUSA300_2001	DNA mismatch repair protein-like protein	SAUSA300_2001
NZ_LR130515_2414084_AATTC_GATTA	0.0465	0.00323	0.762	0.149		NZ_LR130515	2414084	AATTC	GATTA	complex	missense_variant	EW033_RS00100				0.0666667	15
NZ_LR130515_2814083_T_C	0.773	0.00333	0.469	0.149		NZ_LR130515	2814083	T	C	snp	missense_variant	EW033_RS14940-EW033_RS14945				0.111111	9
NZ_LR130515_15554_G_GTT	0.132	0.00342	0.593	0.148		NZ_LR130515	15554	G	GTT	ins	missense_variant	EW033_RS00060-EW033_RS00065				0.166667	6
NZ_LR130515_136501_T_G	0.0103	0.00342	-1.41	0.148	sarS	NZ_LR130515	136501	T	G	snp	missense_variant	EW033_RS00700	sarS	HTH-type transcriptional regulator SarS	Q117H	0.5	2	SAUSA300_0114	accessory regulator	SAUSA300_0114
NZ_LR130515_534631_AACAACGA_TACAGCAT	0.0827	0.00376	-0.791	0.147	ssl9	NZ_LR130515	534631	AACAACGA	TACAGCAT	complex	missense_variant	EW033_RS02760		superantigen-like protein SSL9	LTTI3FTAL	0.166667	6	SAUSA300_0403	superantigen-like protein	SAUSA300_0403
NZ_LR130515_2989738_CGTT_AGTC	0.111	0.00379	-1.06	0.147	sasA	NZ_LR130515	2989738	CGTT	AGTC	complex	missense_variant	EW033_RS15780	sasA	serine-rich repeat glycoprotein adhesin SasA	I63M	0.2	5	SAUSA300_2589	cell wall anchor domain-containing protein	SAUSA300_2589
NZ_LR130515_1451808_T_A	0.0207	0.0038	0.918	0.147	parC	NZ_LR130515	1451808	T	A	snp	missense_variant	EW033_RS07530	parC	DNA topoisomerase IV subunit A	F80Y	0.125	8	SAUSA300_1251	DNA topoisomerase IV subunit A	parC	parE-parC
NZ_LR130515_2161253_T_G	0.119	0.0039	0.882	0.146	lukH	NZ_LR130515	2161253	T	G	snp	missense_variant	EW033_RS11380	lukH	bi-component leukocidin LukGH subunit H	I17L	0.25	4	SAUSA300_1975	Aerolysin/leukocidin family protein	SAUSA300_1975	lukG-lukH
NZ_LR130515_1495593_C_A	0.14	0.00392	0.894	0.146	asd	NZ_LR130515	1495593	C	A	snp	missense_variant	EW033_RS07730		aspartate-semialdehyde dehydrogenase	Q42K	0.166667	6	SAUSA300_1287	aspartate semialdehyde dehydrogenase	asd	lysC-asd-dapA-dapB-dapD
NZ_LR130515_136012_A_T	0.0129	0.00416	-1.33	0.145		NZ_LR130515	136012	A	T	snp	missense_variant	EW033_RS00100				0.5	2
NZ_LR130515_2997704_C_T	0.114	0.00417	-1.05	0.145		NZ_LR130515	2997704	C	T	snp	missense_variant	EW033_RS15835-EW033_RS15840				0.2	5
NZ_LR130515_1594847_ATCATTC_TTTATTT	0.0155	0.00437	1.16	0.145		NZ_LR130515	1594847	ATCATTC	TTTATTT	complex	missense_variant	EW033_RS00100				0.125	8
NZ_LR130515_2949288_TATTATC_GATTGTT	0.031	0.00443	-1.08	0.144	clfB	NZ_LR130515	2949288	TATTATC	GATTGTT	complex	missense_variant	EW033_RS15655	clfB	MSCRAMM family adhesin clumping factor ClfB	DNK353NNQ	0.333333	3	SAUSA300_2565	clumping factor B	clfB
NZ_LR130515_2650810_T_C	0.501	0.00444	0.509	0.144	iruO	NZ_LR130515	2650810	T	C	snp	missense_variant	EW033_RS14095		NAD(P)/FAD-dependent oxidoreductase	M193V	0.5	2	SAUSA300_2319	pyridine nucleotide-disulfide oxidoreductase	SAUSA300_2319	SAUSA300_2318-iruO
NZ_LR130515_1509230_C_A	0.354	0.00445	0.725	0.144	SAUSA300_1301	NZ_LR130515	1509230	C	A	snp	missense_variant	EW033_RS07810		nitric oxide reductase activation protein NorD	E485D	0.111111	9	SAUSA300_1301	hypothetical protein	SAUSA300_1301	SAUSA300_1301-SAUSA300_1302
NZ_LR130515_579877_C_G	0.796	0.00449	0.522	0.144	treC	NZ_LR130515	579877	C	G	snp	missense_variant	EW033_RS02985	treC	alpha,alpha-phosphotrehalase	Q36E	0.5	2	SAUSA300_0449	alpha,alpha-phosphotrehalase	treC	treP-treC-treR
NZ_LR130515_704717_A_AT	0.0388	0.00457	0.68	0.144		NZ_LR130515	704717	A	AT	ins	missense_variant	EW033_RS00100				0.142857	7
NZ_LR130515_377173_C_T	0.0155	0.00467	1.02	0.144	gehB	NZ_LR130515	377173	C	T	snp	missense_variant	EW033_RS01790	lip2	YSIRK domain-containing triacylglycerol lipase Lip2/Geh	H129Y	0.5	2	SAUSA300_0320	triacylglycerol lipase	SAUSA300_0320
NZ_LR130515_2325813_C_T	0.0155	0.00467	1.02	0.144	ilvB	NZ_LR130515	2325813	C	T	snp	missense_variant	EW033_RS12320	ilvB	biosynthetic-type acetolactate synthase large subunit	T574I	0.5	2	SAUSA300_2007	acetolactate synthase large subunit	ilvB	ilvD-ilvB-ilvH
NZ_LR130515_2715368_CA_C	0.0155	0.00467	1.02	0.144	SAUSA300_2378	NZ_LR130515	2715368	CA	C	del	missense_variant	EW033_RS14455		membrane protein	K69fs	0.5	2	SAUSA300_2378	hypothetical protein	SAUSA300_2378	SAUSA300_2377-SAUSA300_2378
NZ_LR130515_2541636_T_C	0.561	0.00486	-0.774	0.143	femX	NZ_LR130515	2541636	T	C	snp	missense_variant	EW033_RS13490	fmhB	lipid II:glycine glycyltransferase FemX	K261E	0.25	4	SAUSA300_2214	FmhB protein	SAUSA300_2214	SAUSA300_2213-femX
NZ_LR130515_2745981_A_T	0.576	0.00497	0.746	0.143		NZ_LR130515	2745981	A	T	snp	missense_variant	EW033_RS14610-EW033_RS14615				0.166667	6
NZ_LR130515_1159120_TA_T	0.0724	0.00499	1.05	0.142		NZ_LR130515	1159120	TA	T	del	missense_variant	EW033_RS00100				0.2	5
NZ_LR130515_862630_A_G	0.796	0.00505	0.515	0.142		NZ_LR130515	862630	A	G	snp	missense_variant	EW033_RS00100				0.5	2
NZ_LR130515_255557_G_A	0.786	0.00517	0.514	0.142	SAUSA300_0213	NZ_LR130515	255557	G	A	snp	missense_variant	EW033_RS01205		Gfo/Idh/MocA family oxidoreductase	A29T	0.5	2	SAUSA300_0213	Gfo/Idh/MocA family oxidoreductase	SAUSA300_0213	SAUSA300_0212-SAUSA300_0213-SAUSA300_0214
NZ_LR130515_485982_C_A	0.786	0.00517	0.514	0.142	pbuX	NZ_LR130515	485982	C	A	snp	missense_variant	EW033_RS02490		purine permease	Q422K	0.5	2	SAUSA300_0387	xanthine permease	pbuX	xpt-pbuX-guaB-guaA
NZ_LR130515_14021_TAT_AAA	0.114	0.00525	-0.861	0.142		NZ_LR130515	14021	TAT	AAA	complex	missense_variant	EW033_RS00050-EW033_RS00055				0.2	5
NZ_LR130515_182994_T_C	0.501	0.00528	0.835	0.142	capE	NZ_LR130515	182994	T	C	snp	missense_variant	EW033_RS00915		polysaccharide biosynthesis protein	W23R	0.5	2	SAUSA300_0156	capsular polysaccharide biosynthesis protein Cap5E	cap5E	capA-capB-capC-capD-capE-capF-capG-capH-capI-capJ-capK-capL-capM-capN-capO-capP
NZ_LR130515_3006802_AT_TC	0.284	0.00531	-0.779	0.141	hisF	NZ_LR130515	3006802	AT	TC	mnp	missense_variant	EW033_RS15880	hisF	imidazole glycerol phosphate synthase subunit HisF	L150M	0.25	4	SAUSA300_2606	imidazole glycerol phosphate synthase subunit HisF	hisF	hisI-hisF-hisA-hisH-hisB-SAUSA300_2610-hisD-hisG-hisZ
NZ_LR130515_908304_T_C	0.0439	0.00546	-0.91	0.141	trxB	NZ_LR130515	908304	T	C	snp	missense_variant	EW033_RS04695	trxB	thioredoxin-disulfide reductase	V269A	0.5	2	SAUSA300_0747	thioredoxin-disulfide reductase	trxB	hprK-lgt-SAUSA300_0745-SAUSA300_0746-trxB
NZ_LR130515_2978406_G_T	0.0284	0.00546	-1.26	0.141	secA2	NZ_LR130515	2978406	G	T	snp	missense_variant	EW033_RS15755	secA2	accessory Sec system translocase SecA2	Q286K	0.333333	3	SAUSA300_2584	preprotein translocase subunit SecA	SAUSA300_2584	gtfB-gtfA-secA2-asp3-asp2-asp1-secY2
NZ_LR130515_2983225_TAGT_CGTC	0.0284	0.00546	-1.26	0.141	asp1	NZ_LR130515	2983225	TAGT	CGTC	mnp	missense_variant	EW033_RS15770	asp1	accessory Sec system protein Asp1	L25T	0.5	2	SAUSA300_2587	accessory secretory protein Asp1	SAUSA300_2587	gtfB-gtfA-secA2-asp3-asp2-asp1-secY2
NZ_LR130515_3011696_T_C	0.0284	0.00546	-1.26	0.141	hisG	NZ_LR130515	3011696	T	C	snp	missense_variant	EW033_RS15910		ATP phosphoribosyltransferase	N86D	0.333333	3	SAUSA300_2612	ATP phosphoribosyltransferase catalytic subunit	hisG	hisI-hisF-hisA-hisH-hisB-SAUSA300_2610-hisD-hisG-hisZ
NZ_LR130515_3044727_T_A	0.0258	0.00549	-1.23	0.141	gidB	NZ_LR130515	3044727	T	A	snp	missense_variant	EW033_RS16075	rsmG	16S rRNA (guanine(527)-N(7))-methyltransferase RsmG	Q23H	0.333333	3	SAUSA300_2644	16S rRNA methyltransferase GidB	gidB	noc-gidB-gidA-trmE
NZ_LR130515_726628_T_A	0.0181	0.00554	1.05	0.141		NZ_LR130515	726628	T	A	snp	missense_variant	EW033_RS00100				0.5	2
NZ_LR130515_2173917_TGGCTTTGGTTTATC_CGGATT	0.0362	0.00557	-0.887	0.141	sdrH	NZ_LR130515	2173917	TGGCTTTGGTTTATC	CGGATT	complex	missense_variant	EW033_RS11450		hypothetical protein	D174_K177delinsN	0.166667	6	SAUSA300_1985	serine-aspartate repeat-containing protein SdrH	sdrH
NZ_LR130515_803507_T_G	0.654	0.00559	1.04	0.141	rbf	NZ_LR130515	803507	T	G	snp	missense_variant	EW033_RS04165		helix-turn-helix transcriptional regulator	Y73D	0.333333	3	SAUSA300_0653	AraC family transcriptional regulator	SAUSA300_0653
NZ_LR130515_2158158_T_TGGG	0.0103	0.00564	-1.29	0.14	hlb-2	NZ_LR130515	2158158	T	TGGG	ins	missense_variant	EW033_RS11370	sph	sphingomyelin phosphodiesterase	G8dup	0.25	4	SAUSA300_1973	truncated beta-hemolysin	SAUSA300_1973	int3-hlb-2
NZ_LR130515_1497557_T_G	0.424	0.00573	0.92	0.14	dapB	NZ_LR130515	1497557	T	G	snp	missense_variant	EW033_RS07740		4-hydroxy-tetrahydrodipicolinate reductase	D71E	0.25	4	SAUSA300_1289	dihydrodipicolinate reductase	dapB	lysC-asd-dapA-dapB-dapD
NZ_LR130515_2807008_C_T	0.0801	0.00578	1.05	0.14		NZ_LR130515	2807008	C	T	snp	missense_variant	EW033_RS14900-EW033_RS14905				0.333333	3
NZ_LR130515_2945692_G_T	0.0129	0.00581	-1.28	0.14	phoB	NZ_LR130515	2945692	G	T	snp	missense_variant	EW033_RS15635		alkaline phosphatase	M363I	0.5	2	SAUSA300_2561	alkaline phosphatase	phoB
NZ_LR130515_592483_GCT_TCC	0.0155	0.00582	-1.08	0.14		NZ_LR130515	592483	GCT	TCC	complex	missense_variant	EW033_RS00100				0.5	2
NZ_LR130515_30640_TTA_ATC	0.194	0.00593	-0.934	0.14	adsA	NZ_LR130515	30640	TTA	ATC	complex	missense_variant	EW033_RS00135		LPXTG-anchored adenosine synthase AdsA	HY61QS	0.166667	6	SAUSA300_0025	5'-nucleotidase family protein	SAUSA300_0025
NZ_LR130515_539642_T_C	0.0749	0.00601	1.37	0.139		NZ_LR130515	539642	T	C	snp	missense_variant	EW033_RS00100				0.5	2
NZ_LR130515_716063_CATTCGG_AATTTGA	0.0749	0.00601	1.37	0.139		NZ_LR130515	716063	CATTCGG	AATTTGA	complex	missense_variant	EW033_RS00100				0.333333	3
NZ_LR130515_3040961_A_G	0.147	0.00608	-0.824	0.139		NZ_LR130515	3040961	A	G	snp	missense_variant	EW033_RS16050-EW033_RS16055				0.333333	3
NZ_LR130515_2986093_AACGCTA_GACACTC	0.194	0.00639	-0.832	0.138	sasA	NZ_LR130515	2986093	AACGCTA	GACACTC	complex	missense_variant	EW033_RS15780	sasA	serine-rich repeat glycoprotein adhesin SasA	D1277E	0.142857	7	SAUSA300_2589	cell wall anchor domain-containing protein	SAUSA300_2589
NZ_LR130515_1748176_C_T	0.0543	0.00645	-0.976	0.138	SAUSA300_1577	NZ_LR130515	1748176	C	T	snp	missense_variant	EW033_RS08940		tetratricopeptide repeat protein	A198T	0.5	2	SAUSA300_1577	TPR domain-containing protein	SAUSA300_1577	recD2-SAUSA300_1577
NZ_LR130515_1494923_A_G	0.599	0.00652	0.691	0.138	lysC	NZ_LR130515	1494923	A	G	snp	missense_variant	EW033_RS07725		aspartate kinase	I241M	0.25	4	SAUSA300_1286	aspartate kinase	SAUSA300_1286	lysC-asd-dapA-dapB-dapD
NZ_LR130515_1056036_A_G	0.0801	0.00659	-1.21	0.138		NZ_LR130515	1056036	A	G	snp	missense_variant	EW033_RS00100				0.25	4
NZ_LR130515_2912115_C_G	0.558	0.00672	0.754	0.138		NZ_LR130515	2912115	C	G	snp	missense_variant	EW033_RS15460-EW033_RS15465				0.125	8
NZ_LR130515_1145671_C_T	0.0103	0.00674	1.28	0.138	purM	NZ_LR130515	1145671	C	T	snp	missense_variant	EW033_RS05975		phosphoribosylformylglycinamidine cyclo-ligase	A182V	0.5	2	SAUSA300_0973	phosphoribosylaminoimidazole synthetase	purM	purE-purK-purC-purS-purQ-purL-purF-purM-purN-purH-purD
NZ_LR130515_1787026_T_A	0.0336	0.00678	-0.883	0.137	radC	NZ_LR130515	1787026	T	A	snp	missense_variant	EW033_RS09160		JAB domain-containing protein	I157F	0.25	4	SAUSA300_1608	DNA repair protein RadC	radC	SAUSA300_1607-radC-comC
NZ_LR130515_1049786_G_A	0.788	0.00679	0.459	0.137	EW033_RS05490	NZ_LR130515	1049786	G	A	snp	missense_variant	EW033_RS05490		DUF3899 domain-containing protein	S85F	0.166667	6
NZ_LR130515_551191_AT_A	0.0129	0.00686	1.07	0.137		NZ_LR130515	551191	AT	A	del	missense_variant	EW033_RS00100				0.111111	9
NZ_LR130515_1491230_A_G	0.465	0.0069	0.768	0.137	cvfB	NZ_LR130515	1491230	A	G	snp	missense_variant	EW033_RS07715	cvfB	RNA-binding virulence regulatory protein CvfB	Y122H	0.2	5	SAUSA300_1284	hypothetical protein	SAUSA300_1284
NZ_LR130515_1463165_G_A	0.775	0.00699	0.444	0.137	msrR	NZ_LR130515	1463165	G	A	snp	missense_variant	EW033_RS07570		LCP family protein	R313K	0.125	8	SAUSA300_1257	peptide methionine sulfoxide reductase regulator MsrR	msrR
NZ_LR130515_1928737_AT_A	0.0103	0.0071	-1.19	0.137	SAUSA300_1716	NZ_LR130515	1928737	AT	A	del	missense_variant	EW033_RS09790		FAD-dependent oxidoreductase	K108fs	0.5	2	SAUSA300_1716	hypothetical protein	SAUSA300_1716
NZ_LR130515_2989236_T_C	0.0982	0.00711	-1.06	0.137	sasA	NZ_LR130515	2989236	T	C	snp	missense_variant	EW033_RS15780	sasA	serine-rich repeat glycoprotein adhesin SasA	I232V	0.25	4	SAUSA300_2589	cell wall anchor domain-containing protein	SAUSA300_2589
NZ_LR130515_2989269_TG_GT	0.0982	0.00711	-1.06	0.137	sasA	NZ_LR130515	2989269	TG	GT	complex	missense_variant	EW033_RS15780	sasA	serine-rich repeat glycoprotein adhesin SasA	NK220KQ	0.25	4	SAUSA300_2589	cell wall anchor domain-containing protein	SAUSA300_2589
NZ_LR130515_2989293_T_C	0.0982	0.00711	-1.06	0.137	sasA	NZ_LR130515	2989293	T	C	snp	missense_variant	EW033_RS15780	sasA	serine-rich repeat glycoprotein adhesin SasA	T213A	0.2	5	SAUSA300_2589	cell wall anchor domain-containing protein	SAUSA300_2589
NZ_LR130515_2993337_TTCCC_ATCCT	0.0982	0.00711	-1.06	0.137	SAUSA300_2593	NZ_LR130515	2993337	TTCCC	ATCCT	complex	missense_variant	EW033_RS15810		flavin reductase family protein	I195L	0.166667	6	SAUSA300_2593	hypothetical protein	SAUSA300_2593
NZ_LR130515_1660966_T_G	0.0827	0.0074	-1.33	0.136	accC	NZ_LR130515	1660966	T	G	snp	missense_variant	EW033_RS08450	accC	acetyl-CoA carboxylase biotin carboxylase subunit	K148Q	0.333333	3	SAUSA300_1475	acetyl-CoA carboxylase biotin carboxylase subunit	accC	ispA-xseB-xseA-nusB-SAUSA300_1474-accC-accB
NZ_LR130515_30845_A_G	0.124	0.00743	-0.735	0.136	adsA	NZ_LR130515	30845	A	G	snp	missense_variant	EW033_RS00135		LPXTG-anchored adenosine synthase AdsA	K130E	0.142857	7	SAUSA300_0025	5'-nucleotidase family protein	SAUSA300_0025
NZ_LR130515_1497638_G_A	0.0879	0.00744	0.86	0.136	dapB	NZ_LR130515	1497638	G	A	snp	missense_variant	EW033_RS07740		4-hydroxy-tetrahydrodipicolinate reductase	M98I	0.2	5	SAUSA300_1289	dihydrodipicolinate reductase	dapB	lysC-asd-dapA-dapB-dapD
NZ_LR130515_1497722_T_A	0.0879	0.00744	0.86	0.136	dapB	NZ_LR130515	1497722	T	A	snp	missense_variant	EW033_RS07740		4-hydroxy-tetrahydrodipicolinate reductase	D126E	0.2	5	SAUSA300_1289	dihydrodipicolinate reductase	dapB	lysC-asd-dapA-dapB-dapD
NZ_LR130515_2496760_GATTCA_AAGTCT	0.0439	0.00753	0.853	0.136	hysA	NZ_LR130515	2496760	GATTCA	AAGTCT	complex	missense_variant	EW033_RS13190	hysA	hyaluronate lyase HysA	D389K	0.166667	6	SAUSA300_2161	hyaluronate lyase	hysA
NZ_LR130515_424723_CAA_AAG	0.359	0.00776	0.944	0.135	EW033_RS02130	NZ_LR130515	424723	CAA	AAG	complex	missense_variant	EW033_RS02130		hypothetical protein	TS28KG	0.333333	3
NZ_LR130515_1127016_CT_C	0.0336	0.00779	0.904	0.135		NZ_LR130515	1127016	CT	C	del	missense_variant	EW033_RS00100				0.5	2
NZ_LR130515_2490320_C_T	0.0336	0.00779	0.904	0.135		NZ_LR130515	2490320	C	T	snp	missense_variant	EW033_RS13145-EW033_RS13150				0.5	2
NZ_LR130515_328749_TACAACAAGCATTGAAGATATGAA_T	0.0155	0.00784	-1.04	0.135	SAUSA300_0269	NZ_LR130515	328749	TACAACAAGCATTGAAGATATGAA	T	del	missense_variant	EW033_RS01535		linear amide C-N hydrolase	E115fs	0.5	2	SAUSA300_0269	choloylglycine hydrolase family protein	SAUSA300_0269
NZ_LR130515_1180522_C_T	0.354	0.00786	0.429	0.135		NZ_LR130515	1180522	C	T	snp	missense_variant	EW033_RS00100				0.2	5
NZ_LR130515_255432_T_C	0.798	0.00788	0.485	0.135	SAUSA300_0212	NZ_LR130515	255432	T	C	snp	missense_variant	EW033_RS01200		Gfo/Idh/MocA family oxidoreductase	V354A	0.5	2	SAUSA300_0212	Gfo/Idh/MocA family oxidoreductase	SAUSA300_0212	SAUSA300_0212-SAUSA300_0213-SAUSA300_0214
NZ_LR130515_1537863_T_C	0.0465	0.00788	-0.884	0.135	ebh	NZ_LR130515	1537863	T	C	snp	missense_variant	EW033_RS07955	ebh	hyperosmolarity resistance protein Ebh	E9204G	0.333333	3	SAUSA300_1327	cell surface protein	SAUSA300_1327
NZ_LR130515_1538766_T_A	0.0465	0.00788	-0.884	0.135	ebh	NZ_LR130515	1538766	T	A	snp	missense_variant	EW033_RS07955	ebh	hyperosmolarity resistance protein Ebh	Q8903L	0.333333	3	SAUSA300_1327	cell surface protein	SAUSA300_1327
NZ_LR130515_1547780_T_G	0.0465	0.00788	-0.884	0.135	ebh	NZ_LR130515	1547780	T	G	snp	missense_variant	EW033_RS07955	ebh	hyperosmolarity resistance protein Ebh	K5898N	0.333333	3	SAUSA300_1327	cell surface protein	SAUSA300_1327
NZ_LR130515_1548210_G_A	0.0465	0.00788	-0.884	0.135	ebh	NZ_LR130515	1548210	G	A	snp	missense_variant	EW033_RS07955	ebh	hyperosmolarity resistance protein Ebh	T5755I	0.333333	3	SAUSA300_1327	cell surface protein	SAUSA300_1327
NZ_LR130515_1550136_G_A	0.0465	0.00788	-0.884	0.135	ebh	NZ_LR130515	1550136	G	A	snp	missense_variant	EW033_RS07955	ebh	hyperosmolarity resistance protein Ebh	A5113V	0.333333	3	SAUSA300_1327	cell surface protein	SAUSA300_1327
NZ_LR130515_1166907_C_A	0.796	0.00795	0.488	0.135	SAUSA300_0992	NZ_LR130515	1166907	C	A	snp	missense_variant	EW033_RS06090		cell-wall-binding lipoprotein	A123E	0.5	2	SAUSA300_0992	hypothetical protein	SAUSA300_0992
NZ_LR130515_32784_T_G	0.0129	0.00797	-1.23	0.135		NZ_LR130515	32784	T	G	snp	missense_variant	EW033_RS00100				0.5	2
NZ_LR130515_704763_A_C	0.775	0.00799	0.462	0.135		NZ_LR130515	704763	A	C	snp	missense_variant	EW033_RS00100				0.2	5
NZ_LR130515_2992798_GA_AT	0.367	0.00804	0.834	0.135		NZ_LR130515	2992798	GA	AT	mnp	missense_variant	EW033_RS15800-EW033_RS15805				0.142857	7
NZ_LR130515_114421_A_G	0.119	0.00811	-0.843	0.134		NZ_LR130515	114421	A	G	snp	missense_variant	EW033_RS00100				0.25	4
NZ_LR130515_2979420_G_T	0.031	0.00818	-1.21	0.134	asp3	NZ_LR130515	2979420	G	T	snp	missense_variant	EW033_RS15760	asp3	accessory Sec system protein Asp3	T264K	0.166667	6	SAUSA300_2585	hypothetical protein	SAUSA300_2585	gtfB-gtfA-secA2-asp3-asp2-asp1-secY2
NZ_LR130515_2979428_T_A	0.031	0.00818	-1.21	0.134	asp3	NZ_LR130515	2979428	T	A	snp	missense_variant	EW033_RS15760	asp3	accessory Sec system protein Asp3	E261D	0.5	2	SAUSA300_2585	hypothetical protein	SAUSA300_2585	gtfB-gtfA-secA2-asp3-asp2-asp1-secY2
NZ_LR130515_2973221_T_C	0.202	0.00819	-0.961	0.134	sasF	NZ_LR130515	2973221	T	C	snp	missense_variant	EW033_RS15740	sasF	cell-wall-anchored protein SasF	N178D	0.2	5	SAUSA300_2581	putative surface anchored protein	SAUSA300_2581
NZ_LR130515_1159114_C_CT	0.0181	0.00833	-1.36	0.134		NZ_LR130515	1159114	C	CT	ins	missense_variant	EW033_RS00100				0.5	2
NZ_LR130515_2661313_GACAATCGAAATC_CACGATAGAAGTA	0.222	0.00835	-0.469	0.134	SAUSA300_2327	NZ_LR130515	2661313	GACAATCGAAATC	CACGATAGAAGTA	complex	missense_variant	EW033_RS14145		pyridoxamine 5'-phosphate oxidase family protein	I87V	0.0416667	24	SAUSA300_2327	hypothetical protein	SAUSA300_2327
NZ_LR130515_2661331_AGAACAAG_TGATCAAA	0.222	0.00835	-0.469	0.134	SAUSA300_2327	NZ_LR130515	2661331	AGAACAAG	TGATCAAA	complex	missense_variant	EW033_RS14145		pyridoxamine 5'-phosphate oxidase family protein	EQE90DQK	0.0416667	24	SAUSA300_2327	hypothetical protein	SAUSA300_2327
NZ_LR130515_2745709_A_G	0.783	0.00841	0.477	0.134	SAUSA300_2403	NZ_LR130515	2745709	A	G	snp	missense_variant	EW033_RS14610		DUF1307 domain-containing protein	I111M	0.5	2	SAUSA300_2403	putative lipoprotein	SAUSA300_2403
NZ_LR130515_2752246_A_G	0.783	0.00841	0.477	0.134	cnzC	NZ_LR130515	2752246	A	G	snp	missense_variant	EW033_RS14640		ABC transporter permease	I43T	0.5	2	SAUSA300_2409	oligopeptide ABC transporter permease	SAUSA300_2409	SAUSA300_2406-cntF-cntD-cnzC-cntB-cntA
NZ_LR130515_13685_G_T	0.0181	0.0085	-1.07	0.134		NZ_LR130515	13685	G	T	snp	missense_variant	EW033_RS00050-EW033_RS00055				0.5	2
NZ_LR130515_2161253_TTG_GTA	0.0439	0.00852	-0.86	0.134	lukH	NZ_LR130515	2161253	TTG	GTA	complex	missense_variant	EW033_RS11380	lukH	bi-component leukocidin LukGH subunit H	AI16VL	0.25	4	SAUSA300_1975	Aerolysin/leukocidin family protein	SAUSA300_1975	lukG-lukH
NZ_LR130515_1714641_G_A	0.0413	0.00858	-0.852	0.133		NZ_LR130515	1714641	G	A	snp	missense_variant	EW033_RS00100				0.333333	3
NZ_LR130515_271544_C_G	0.0284	0.00864	0.932	0.133	EW033_RS01260	NZ_LR130515	271544	C	G	snp	missense_variant	EW033_RS01260	coa	staphylocoagulase	S505R	0.166667	6
NZ_LR130515_438729_TGAGTA_GGAACG	0.0284	0.00864	0.932	0.133		NZ_LR130515	438729	TGAGTA	GGAACG	complex	missense_variant	EW033_RS00100				0.2	5
NZ_LR130515_779282_G_CCATCGAGA	0.0284	0.00864	0.932	0.133		NZ_LR130515	779282	G	CCATCGAGA	complex	missense_variant	EW033_RS00100				0.5	2
NZ_LR130515_877992_AATA_GACC	0.0284	0.00864	0.932	0.133	SAUSA300_0723	NZ_LR130515	877992	AATA	GACC	complex	missense_variant	EW033_RS04560		GrpB family protein	DI134EV	0.5	2	SAUSA300_0723	hypothetical protein	SAUSA300_0723
NZ_LR130515_948215_G_A	0.0284	0.00864	0.932	0.133	aroD	NZ_LR130515	948215	G	A	snp	missense_variant	EW033_RS04920		type I 3-dehydroquinate dehydratase	G97S	0.5	2	SAUSA300_0787	3-dehydroquinate dehydratase	aroD
NZ_LR130515_1205884_TAC_CAA	0.0284	0.00864	0.932	0.133	isdD	NZ_LR130515	1205884	TAC	CAA	complex	missense_variant	EW033_RS06295		hypothetical protein	T216N	0.333333	3	SAUSA300_1031	hypothetical protein	SAUSA300_1031	isdC-isdD-isdE-isdF
NZ_LR130515_1232303_TGAT_CGAG	0.0284	0.00864	0.932	0.133	efb	NZ_LR130515	1232303	TGAT	CGAG	complex	missense_variant	EW033_RS06440		complement convertase inhibitor Efb	D102E	0.5	2	SAUSA300_1055	fibrinogen-binding protein	efb
NZ_LR130515_1242716_TAATG_CAATA	0.0284	0.00864	0.932	0.133	argF	NZ_LR130515	1242716	TAATG	CAATA	complex	missense_variant	EW033_RS06515	argF	ornithine carbamoyltransferase	A280T	0.5	2	SAUSA300_1062	ornithine carbamoyltransferase	argF	argF-arcC1
NZ_LR130515_1450230_C_A	0.0284	0.00864	0.932	0.133	parE	NZ_LR130515	1450230	C	A	snp	missense_variant	EW033_RS07525	parE	DNA topoisomerase IV subunit B	H218N	0.5	2	SAUSA300_1250	DNA topoisomerase IV subunit B	parE	parE-parC
NZ_LR130515_1552276_CTACA_GTACT	0.0284	0.00864	0.932	0.133	ebh	NZ_LR130515	1552276	CTACA	GTACT	complex	missense_variant	EW033_RS07955	ebh	hyperosmolarity resistance protein Ebh	A4400P	0.333333	3	SAUSA300_1327	cell surface protein	SAUSA300_1327
NZ_LR130515_1720868_GAA_TAG	0.0284	0.00864	0.932	0.133	comEA	NZ_LR130515	1720868	GAA	TAG	complex	missense_variant	EW033_RS08780		ComEA family DNA-binding protein	IL22TI	0.1	10	SAUSA300_1549	ComE operon protein 1	SAUSA300_1549	comEA-SAUSA300_1550-rsfS-SAUSA300_1552-nadD-SAUSA300_1554-aroE-SAUSA300_1556-SAUSA300_1557-mtnN
NZ_LR130515_1794347_TT_AA	0.0284	0.00864	0.932	0.133	SAUSA300_1613	NZ_LR130515	1794347	TT	AA	mnp	missense_variant	EW033_RS09190		AbrB family transcriptional regulator	I99L	0.5	2	SAUSA300_1613	putative abrB protein	SAUSA300_1613
NZ_LR130515_2093734_TG_CA	0.0284	0.00864	0.932	0.133	SAUSA300_1898	NZ_LR130515	2093734	TG	CA	complex	missense_variant	EW033_RS10885		pectate lyase	I156V	0.333333	3	SAUSA300_1898	hypothetical protein	SAUSA300_1898
NZ_LR130515_2437537_G_A	0.0284	0.00864	0.932	0.133	fmtB	NZ_LR130515	2437537	G	A	snp	missense_variant	EW033_RS12905		DUF1542 domain-containing protein	T1887I	0.5	2	SAUSA300_2109	truncated FmtB protein	fmtB
NZ_LR130515_2657143_TCAA_CCAT	0.0284	0.00864	0.932	0.133	SAUSA300_2325	NZ_LR130515	2657143	TCAA	CCAT	complex	missense_variant	EW033_RS14135		YbgA family protein	Q43H	0.2	5	SAUSA300_2325	hypothetical protein	SAUSA300_2325
NZ_LR130515_2668661_G_A	0.0284	0.00864	0.932	0.133	SAUSA300_2336	NZ_LR130515	2668661	G	A	snp	missense_variant	EW033_RS14190		MerR family transcriptional regulator	R100H	0.333333	3	SAUSA300_2336	MerR family transcriptional regulator	SAUSA300_2336	SAUSA300_2334-SAUSA300_2335-SAUSA300_2336
NZ_LR130515_2844821_G_T	0.0284	0.00864	0.932	0.133		NZ_LR130515	2844821	G	T	snp	missense_variant	EW033_RS15105-EW033_RS15110				0.2	5
NZ_LR130515_2903639_C_T	0.0284	0.00864	0.932	0.133	SAUSA300_2527	NZ_LR130515	2903639	C	T	snp	missense_variant	EW033_RS15410		hypothetical protein	P25S	0.166667	6	SAUSA300_2527	hypothetical protein	SAUSA300_2527
NZ_LR130515_342229_C_A	0.0103	0.00872	-1.3	0.133	EW033_RS01595	NZ_LR130515	342229	C	A	snp	missense_variant	EW033_RS01595	essC	type VII secretion protein EssC	L76I	0.5	2
NZ_LR130515_639129_G_T	0.0103	0.00872	-1.3	0.133	pdxS	NZ_LR130515	639129	G	T	snp	missense_variant	EW033_RS03320	pdxS	pyridoxal 5'-phosphate synthase lyase subunit PdxS	E292D	0.5	2	SAUSA300_0504	pyridoxal biosynthesis lyase PdxS	SAUSA300_0504	pdxS-pdxT
NZ_LR130515_743672_G_T	0.0103	0.00872	-1.3	0.133	SAUSA300_0595	NZ_LR130515	743672	G	T	snp	missense_variant	EW033_RS03860		DUF1934 family protein	D96Y	0.5	2	SAUSA300_0595	hypothetical protein	SAUSA300_0595	SAUSA300_0595-argS
NZ_LR130515_823795_T_G	0.0103	0.00872	-1.3	0.133		NZ_LR130515	823795	T	G	snp	missense_variant	EW033_RS00100				0.5	2
NZ_LR130515_952891_C_T	0.0103	0.00872	-1.3	0.133	SAUSA300_0794	NZ_LR130515	952891	C	T	snp	missense_variant	EW033_RS04960		topiosmerase	T107I	0.5	2	SAUSA300_0794	TOPRIM domain-containing protein	SAUSA300_0794	SAUSA300_0794-SAUSA300_0795
NZ_LR130515_1053151_A_T	0.0103	0.00872	-1.3	0.133	opp-3D	NZ_LR130515	1053151	A	T	snp	missense_variant	EW033_RS05505		ABC transporter ATP-binding protein	K286I	0.5	2	SAUSA300_0889	oligopeptide ABC transporter ATP-binding protein	oppD	opp-3B-opp-3C-opp-3D-opp-3F-opp-3A
NZ_LR130515_2351054_C_T	0.0103	0.00872	-1.3	0.133	kdpB	NZ_LR130515	2351054	C	T	snp	missense_variant	EW033_RS12465	kdpB	potassium-transporting ATPase subunit KdpB	M669I	0.5	2	SAUSA300_2033	potassium-transporting ATPase subunit B	kdpB	kdpC-kdpB-kdpA
NZ_LR130515_2357263_G_C	0.0103	0.00872	-1.3	0.133	kdpD	NZ_LR130515	2357263	G	C	snp	missense_variant	EW033_RS12480		sensor histidine kinase KdpD	R746P	0.5	2	SAUSA300_2035	sensor histidine kinase, KdpD	kdpD	kdpD-kdpE
NZ_LR130515_2703115_GC_AT	0.0103	0.00872	-1.3	0.133	hlgB	NZ_LR130515	2703115	GC	AT	complex	missense_variant	EW033_RS14380	hlgB	bi-component gamma-hemolysin HlgAB/HlgCB subunit B	327	0.5	2	SAUSA300_2367	gamma-hemolysin component B	hlgB	hlgC-hlgB
NZ_LR130515_13834_TGATA_CGAT	0.0129	0.00881	-1.33	0.133		NZ_LR130515	13834	TGATA	CGAT	complex	missense_variant	EW033_RS00050-EW033_RS00055				0.142857	7
NZ_LR130515_29410_T_G	0.0129	0.00881	-1.33	0.133		NZ_LR130515	29410	T	G	snp	missense_variant	EW033_RS00100				0.5	2
NZ_LR130515_29418_T_A	0.0129	0.00881	-1.33	0.133		NZ_LR130515	29418	T	A	snp	missense_variant	EW033_RS00100				0.5	2
NZ_LR130515_2953907_C_T	0.0129	0.00881	-1.33	0.133		NZ_LR130515	2953907	C	T	snp	missense_variant	EW033_RS15670-EW033_RS15675				0.5	2
NZ_LR130515_2956640_A_T	0.0129	0.00881	-1.33	0.133	argR	NZ_LR130515	2956640	A	T	snp	missense_variant	EW033_RS15690		arginine repressor	D138E	0.5	2	SAUSA300_2571	arginine repressor	argR
NZ_LR130515_2961283_TATTGTG_CATTATT	0.0129	0.00881	-1.33	0.133	SAUSA300_2575	NZ_LR130515	2961283	TATTGTG	CATTATT	complex	missense_variant	EW033_RS15710		BglG family transcription antiterminator	V144I	0.5	2	SAUSA300_2575	BglG family transcriptional antiterminator	SAUSA300_2575	SAUSA300_2575-manP-pmi
NZ_LR130515_2961347_TCAGGGCATGTACAT_ACCGGACACGTTAAC	0.0129	0.00881	-1.33	0.133	SAUSA300_2575	NZ_LR130515	2961347	TCAGGGCATGTACAT	ACCGGACACGTTAAC	complex	missense_variant	EW033_RS15710		BglG family transcription antiterminator	SGHVH164TGHVN	0.5	2	SAUSA300_2575	BglG family transcriptional antiterminator	SAUSA300_2575	SAUSA300_2575-manP-pmi
NZ_LR130515_2961391_TGATTCA_CGATGCC	0.0129	0.00881	-1.33	0.133	SAUSA300_2575	NZ_LR130515	2961391	TGATTCA	CGATGCC	complex	missense_variant	EW033_RS15710		BglG family transcription antiterminator	S180A	0.5	2	SAUSA300_2575	BglG family transcriptional antiterminator	SAUSA300_2575	SAUSA300_2575-manP-pmi
NZ_LR130515_2961402_AAA_GAC	0.0129	0.00881	-1.33	0.133	SAUSA300_2575	NZ_LR130515	2961402	AAA	GAC	complex	missense_variant	EW033_RS15710		BglG family transcription antiterminator	Q182R	0.5	2	SAUSA300_2575	BglG family transcriptional antiterminator	SAUSA300_2575	SAUSA300_2575-manP-pmi
NZ_LR130515_2961578_A_C	0.0129	0.00881	-1.33	0.133	SAUSA300_2575	NZ_LR130515	2961578	A	C	snp	missense_variant	EW033_RS15710		BglG family transcription antiterminator	K241Q	0.5	2	SAUSA300_2575	BglG family transcriptional antiterminator	SAUSA300_2575	SAUSA300_2575-manP-pmi
NZ_LR130515_2961589_CGA_TAC	0.0129	0.00881	-1.33	0.133	SAUSA300_2575	NZ_LR130515	2961589	CGA	TAC	mnp	missense_variant	EW033_RS15710		BglG family transcription antiterminator	E245T	0.5	2	SAUSA300_2575	BglG family transcriptional antiterminator	SAUSA300_2575	SAUSA300_2575-manP-pmi
NZ_LR130515_2963606_GGTCG_CGTTA	0.0129	0.00881	-1.33	0.133	manP	NZ_LR130515	2963606	GGTCG	CGTTA	complex	missense_variant	EW033_RS15715		PTS transporter subunit EIIA	V268I	0.5	2	SAUSA300_2576	phosphotransferase system, fructose-specific IIABC component	SAUSA300_2576	SAUSA300_2575-manP-pmi
NZ_LR130515_2963654_TAA_GAG	0.0129	0.00881	-1.33	0.133	manP	NZ_LR130515	2963654	TAA	GAG	complex	missense_variant	EW033_RS15715		PTS transporter subunit EIIA	N283S	0.5	2	SAUSA300_2576	phosphotransferase system, fructose-specific IIABC component	SAUSA300_2576	SAUSA300_2575-manP-pmi
NZ_LR130515_2963688_A_G	0.0129	0.00881	-1.33	0.133	manP	NZ_LR130515	2963688	A	G	snp	missense_variant	EW033_RS15715		PTS transporter subunit EIIA	S294G	0.5	2	SAUSA300_2576	phosphotransferase system, fructose-specific IIABC component	SAUSA300_2576	SAUSA300_2575-manP-pmi
NZ_LR130515_2963721_A_C	0.0129	0.00881	-1.33	0.133	manP	NZ_LR130515	2963721	A	C	snp	missense_variant	EW033_RS15715		PTS transporter subunit EIIA	M305L	0.5	2	SAUSA300_2576	phosphotransferase system, fructose-specific IIABC component	SAUSA300_2576	SAUSA300_2575-manP-pmi
NZ_LR130515_3002434_A_T	0.0129	0.00881	-1.33	0.133		NZ_LR130515	3002434	A	T	snp	missense_variant	EW033_RS15860-EW033_RS16325				0.5	2
NZ_LR130515_3026518_T_A	0.0129	0.00881	-1.33	0.133	SAUSA300_2627	NZ_LR130515	3026518	T	A	snp	missense_variant	EW033_RS15980		anion permease	F26I	0.5	2	SAUSA300_2627	2-oxoglutarate/malate translocator	SAUSA300_2627
NZ_LR130515_3031299_A_G	0.0129	0.00881	-1.33	0.133		NZ_LR130515	3031299	A	G	snp	missense_variant	EW033_RS15995-EW033_RS16000				0.5	2
NZ_LR130515_3031374_AGTA_TATT	0.0129	0.00881	-1.33	0.133		NZ_LR130515	3031374	AGTA	TATT	complex	missense_variant	EW033_RS15995-EW033_RS16000				0.166667	6
NZ_LR130515_3048122_G_A	0.0129	0.00881	-1.33	0.133		NZ_LR130515	3048122	G	A	snp	missense_variant	EW033_RS16085-EW033_RS16090				0.5	2
NZ_LR130515_3049472_A_C	0.0129	0.00881	-1.33	0.133		NZ_LR130515	3049472	A	C	snp	missense_variant	EW033_RS16095-CHR_END				0.5	2
NZ_LR130515_2488592_T_C	0.7	0.00883	0.477	0.133	lacC	NZ_LR130515	2488592	T	C	snp	missense_variant	EW033_RS13140	lacC	tagatose-6-phosphate kinase	D227G	0.333333	3	SAUSA300_2153	tagatose-6-phosphate kinase	lacC	lacG-lacE-lacF-lacD-lacC-lacB-lacA
NZ_LR130515_826268_C_A	0.0103	0.00886	1.14	0.133	SAUSA300_0677	NZ_LR130515	826268	C	A	snp	missense_variant	EW033_RS04290		deoxyribodipyrimidine photo-lyase	T276N	0.5	2	SAUSA300_0677	putative deoxyribodipyrimidine photolyase	SAUSA300_0677
NZ_LR130515_310247_TCGTTTA_CTGATTT	0.439	0.00888	0.686	0.133		NZ_LR130515	310247	TCGTTTA	CTGATTT	complex	missense_variant	EW033_RS00100				0.0909091	11
NZ_LR130515_1886040_CTT_TTC	0.0258	0.00893	1.07	0.133	EW033_RS09615	NZ_LR130515	1886040	CTT	TTC	complex	missense_variant	EW033_RS09615		hypothetical protein	R131K	0.2	5
NZ_LR130515_1929540_C_T	0.0439	0.00893	0.835	0.133		NZ_LR130515	1929540	C	T	snp	missense_variant	EW033_RS00100				0.333333	3
NZ_LR130515_15554_G_GT	0.375	0.00903	-0.467	0.133		NZ_LR130515	15554	G	GT	ins	missense_variant	EW033_RS00060-EW033_RS00065				0.166667	6
NZ_LR130515_575477_G_A	0.031	0.00905	0.868	0.133	gltB	NZ_LR130515	575477	G	A	snp	missense_variant	EW033_RS02965	gltB	glutamate synthase large subunit	G1337R	0.5	2	SAUSA300_0445	glutamate synthase, large subunit	gltB	gltB-gltD
NZ_LR130515_2961648_C_G	0.0465	0.00906	-1.02	0.133	SAUSA300_2575	NZ_LR130515	2961648	C	G	snp	missense_variant	EW033_RS15710		BglG family transcription antiterminator	A264G	0.333333	3	SAUSA300_2575	BglG family transcriptional antiterminator	SAUSA300_2575	SAUSA300_2575-manP-pmi
NZ_LR130515_2961735_G_A	0.0465	0.00906	-1.02	0.133	SAUSA300_2575	NZ_LR130515	2961735	G	A	snp	missense_variant	EW033_RS15710		BglG family transcription antiterminator	R293H	0.333333	3	SAUSA300_2575	BglG family transcriptional antiterminator	SAUSA300_2575	SAUSA300_2575-manP-pmi
NZ_LR130515_1999003_AA_TTAACATATTTATTTTTTTT	0.0155	0.00909	1.06	0.132	EW033_RS10255	NZ_LR130515	1999003	AA	TTAACATATTTATTTTTTTT	complex	missense_variant	EW033_RS10255		hypothetical protein	K27delinsLTYLFFL	0.25	4
NZ_LR130515_33075_A_G	0.0155	0.00911	-1.09	0.132		NZ_LR130515	33075	A	G	snp	missense_variant	EW033_RS00100				0.333333	3
NZ_LR130515_1954026_CA_TG	0.0646	0.00922	-0.837	0.132	SAUSA300_1742	NZ_LR130515	1954026	CA	TG	complex	missense_variant	EW033_RS09930		hypothetical protein	N149D	0.333333	3	SAUSA300_1742	hypothetical protein	SAUSA300_1742	SAUSA300_1741-SAUSA300_1742-SAUSA300_1743
NZ_LR130515_2832553_C_CA	0.0904	0.00931	0.692	0.132		NZ_LR130515	2832553	C	CA	ins	missense_variant	EW033_RS15040-EW033_RS15045				0.142857	7
NZ_LR130515_1196966_A_G	0.522	0.00933	0.447	0.132		NZ_LR130515	1196966	A	G	snp	missense_variant	EW033_RS00100				0.2	5
NZ_LR130515_2986951_TGT_CCC	0.183	0.00935	-1.02	0.132	sasA	NZ_LR130515	2986951	TGT	CCC	complex	missense_variant	EW033_RS15780	sasA	serine-rich repeat glycoprotein adhesin SasA	T993G	0.166667	6	SAUSA300_2589	cell wall anchor domain-containing protein	SAUSA300_2589
NZ_LR130515_129591_AATAAAAATCTA_TATAGACATGAT	0.0724	0.00938	-0.89	0.132		NZ_LR130515	129591	AATAAAAATCTA	TATAGACATGAT	complex	missense_variant	EW033_RS00100				0.142857	7
NZ_LR130515_740320_C_A	0.408	0.0094	0.416	0.132	SAUSA300_0592	NZ_LR130515	740320	C	A	snp	missense_variant	EW033_RS03840		HD domain-containing protein	L199I	0.111111	9	SAUSA300_0592	hypothetical protein	SAUSA300_0592	SAUSA300_0591-SAUSA300_0592-SAUSA300_0593
NZ_LR130515_30322_G_A	0.15	0.00947	-0.779	0.132		NZ_LR130515	30322	G	A	snp	missense_variant	EW033_RS00100				0.142857	7
NZ_LR130515_1940618_A_AT	0.235	0.0095	0.444	0.132	SAUSA300_1728	NZ_LR130515	1940618	A	AT	ins	missense_variant	EW033_RS09865		aldo/keto reductase	N274fs	0.2	5	SAUSA300_1728	aldo/keto reductase family oxidoreductase	SAUSA300_1728
NZ_LR130515_13987_CCCGT_TCCGC	0.0129	0.00963	-1.25	0.131		NZ_LR130515	13987	CCCGT	TCCGC	complex	missense_variant	EW033_RS00050-EW033_RS00055				0.0555556	18
NZ_LR130515_2869175_C_T	0.793	0.00982	0.466	0.131	EW033_RS15205	NZ_LR130515	2869175	C	T	snp	missense_variant	EW033_RS15205		hypothetical protein	Ter26Ter	0.333333	3
NZ_LR130515_2020841_CGCTAT_GCCTAA	0.0698	0.00983	-0.955	0.131		NZ_LR130515	2020841	CGCTAT	GCCTAA	complex	missense_variant	EW033_RS00100				0.166667	6
NZ_LR130515_1332111_AGGGA_GGGGC	0.176	0.00984	0.741	0.131	dprA	NZ_LR130515	1332111	AGGGA	GGGGC	complex	missense_variant	EW033_RS06940	dprA	DNA-protecting protein DprA	E33G	0.5	2	SAUSA300_1142	DNA protecting protein DprA	dprA	dprA-topA
NZ_LR130515_2988772_TACAT_AACAC	0.178	0.00992	-1	0.131	sasA	NZ_LR130515	2988772	TACAT	AACAC	complex	missense_variant	EW033_RS15780	sasA	serine-rich repeat glycoprotein adhesin SasA	N385S	0.2	5	SAUSA300_2589	cell wall anchor domain-containing protein	SAUSA300_2589
NZ_LR130515_2985933_T_C	0.199	0.0101	-0.784	0.131	sasA	NZ_LR130515	2985933	T	C	snp	missense_variant	EW033_RS15780	sasA	serine-rich repeat glycoprotein adhesin SasA	T1333A	0.125	8	SAUSA300_2589	cell wall anchor domain-containing protein	SAUSA300_2589
NZ_LR130515_1130832_T_C	0.0465	0.0102	-0.853	0.13	fmtA	NZ_LR130515	1130832	T	C	snp	missense_variant	EW033_RS05895	fmtA	teichoic acid D-Ala esterase FmtA	F346L	0.5	2	SAUSA300_0959	fmt protein	fmt
NZ_LR130515_2939858_A_T	0.553	0.0102	0.643	0.13	SAUSA300_2556	NZ_LR130515	2939858	A	T	snp	missense_variant	EW033_RS15610		ABC transporter permease	C634S	0.0909091	11	SAUSA300_2556	ABC transporter protein	SAUSA300_2556	SAUSA300_2556-SAUSA300_2557-nsaS-nsaR-SAUSA300_2560
NZ_LR130515_1293701_A_T	0.116	0.0103	0.843	0.13		NZ_LR130515	1293701	A	T	snp	missense_variant	EW033_RS00100				0.5	2
NZ_LR130515_467560_ATAA_TTAG	0.0336	0.0104	0.866	0.13		NZ_LR130515	467560	ATAA	TTAG	complex	missense_variant	EW033_RS00100				0.0588235	17
NZ_LR130515_423703_T_A	0.326	0.0105	0.848	0.13	SAUSA300_0322	NZ_LR130515	423703	T	A	snp	missense_variant	EW033_RS02125		NADH-dependent flavin oxidoreductase	E281D	0.333333	3	SAUSA300_0322	Oye family NADH-dependent flavin oxidoreductase	SAUSA300_0322	SAUSA300_0321-SAUSA300_0322
NZ_LR130515_643264_G_A	0.796	0.0106	0.472	0.13	mcsB	NZ_LR130515	643264	G	A	snp	missense_variant	EW033_RS03345		protein arginine kinase	G315D	0.5	2	SAUSA300_0509	ATP:guanido phosphotransferase	SAUSA300_0509	ctsR-mcsA-mcsB-clpC
NZ_LR130515_660090_T_C	0.0982	0.0106	0.979	0.13		NZ_LR130515	660090	T	C	snp	missense_variant	EW033_RS00100				0.5	2
NZ_LR130515_1016116_G_A	0.0465	0.0106	-0.674	0.13	glpQ	NZ_LR130515	1016116	G	A	snp	missense_variant	EW033_RS05360		glycerophosphodiester phosphodiesterase	P173S	0.5	2	SAUSA300_0862	glycerophosphoryl diester phosphodiesterase	glpQ
NZ_LR130515_1402509_A_G	0.313	0.0106	0.409	0.13		NZ_LR130515	1402509	A	G	snp	missense_variant	EW033_RS00100				0.0769231	13
NZ_LR130515_2020827_GTACA_TTATT	0.0724	0.0106	-0.899	0.13		NZ_LR130515	2020827	GTACA	TTATT	complex	missense_variant	EW033_RS00100				0.125	8
NZ_LR130515_2655335_A_G	0.796	0.0106	0.472	0.13		NZ_LR130515	2655335	A	G	snp	missense_variant	EW033_RS14125-EW033_RS14130				0.5	2
NZ_LR130515_1205567_C_A	0.0801	0.0107	1.36	0.13	isdD	NZ_LR130515	1205567	C	A	snp	missense_variant	EW033_RS06295		hypothetical protein	Q110K	0.5	2	SAUSA300_1031	hypothetical protein	SAUSA300_1031	isdC-isdD-isdE-isdF
NZ_LR130515_2515050_C_T	0.0129	0.0108	-1.03	0.129	rplQ	NZ_LR130515	2515050	C	T	snp	missense_variant	EW033_RS13290		50S ribosomal protein L17	G87D	0.5	2	SAUSA300_2177	50S ribosomal protein L17	rplQ	rplQ-rpoA-rpsK-rpsM-rpmJ-infA
NZ_LR130515_2986036_TGACAAA_CGATGCG	0.0827	0.011	-1.26	0.129	sasA	NZ_LR130515	2986036	TGACAAA	CGATGCG	complex	missense_variant	EW033_RS15780	sasA	serine-rich repeat glycoprotein adhesin SasA	L1297A	0.333333	3	SAUSA300_2589	cell wall anchor domain-containing protein	SAUSA300_2589
NZ_LR130515_2986048_AGAGTCA_TGAATTT	0.0827	0.011	-1.26	0.129	sasA	NZ_LR130515	2986048	AGAGTCA	TGAATTT	complex	missense_variant	EW033_RS15780	sasA	serine-rich repeat glycoprotein adhesin SasA	D1293N	0.333333	3	SAUSA300_2589	cell wall anchor domain-containing protein	SAUSA300_2589
NZ_LR130515_2986059_A_C	0.0827	0.011	-1.26	0.129	sasA	NZ_LR130515	2986059	A	C	snp	missense_variant	EW033_RS15780	sasA	serine-rich repeat glycoprotein adhesin SasA	L1291V	0.333333	3	SAUSA300_2589	cell wall anchor domain-containing protein	SAUSA300_2589
NZ_LR130515_3005454_G_A	0.0155	0.011	-1.28	0.129		NZ_LR130515	3005454	G	A	snp	missense_variant	EW033_RS15870-EW033_RS15875				0.5	2
NZ_LR130515_129494_G_A	0.0543	0.0112	-0.93	0.129		NZ_LR130515	129494	G	A	snp	missense_variant	EW033_RS00100				0.166667	6
NZ_LR130515_2915730_C_CT	0.031	0.0113	0.834	0.129	SAUSA300_2539	NZ_LR130515	2915730	C	CT	ins	missense_variant	EW033_RS15480		aspartate aminotransferase family protein	G336fs	0.5	2	SAUSA300_2539	4-aminobutyrate aminotransferase	SAUSA300_2539
NZ_LR130515_1760890_A_G	0.793	0.0114	0.468	0.128	lytH	NZ_LR130515	1760890	A	G	snp	missense_variant	EW033_RS09005		SH3 domain-containing protein	S63P	0.5	2	SAUSA300_1588	N-acetylmuramoyl-L-alanine amidase	lytH	lytH-dtd-relA
NZ_LR130515_1861598_T_A	0.793	0.0114	0.468	0.128		NZ_LR130515	1861598	T	A	snp	missense_variant	EW033_RS00100				0.5	2
NZ_LR130515_2751509_G_A	0.773	0.0114	0.443	0.128	cnzC	NZ_LR130515	2751509	G	A	snp	missense_variant	EW033_RS14640		ABC transporter permease	P289S	0.333333	3	SAUSA300_2409	oligopeptide ABC transporter permease	SAUSA300_2409	SAUSA300_2406-cntF-cntD-cnzC-cntB-cntA
NZ_LR130515_2971804_T_A	0.214	0.0114	-0.654	0.128		NZ_LR130515	2971804	T	A	snp	missense_variant	EW033_RS15735-EW033_RS15740				0.142857	7
NZ_LR130515_1922549_G_T	0.0129	0.0115	-1.01	0.128	EW033_RS09760	NZ_LR130515	1922549	G	T	snp	missense_variant	EW033_RS09760		hypothetical protein	F49L	0.2	5
NZ_LR130515_1490735_C_T	0.556	0.0117	0.56	0.128	cvfB	NZ_LR130515	1490735	C	T	snp	missense_variant	EW033_RS07715	cvfB	RNA-binding virulence regulatory protein CvfB	A287T	0.0666667	15	SAUSA300_1284	hypothetical protein	SAUSA300_1284
NZ_LR130515_1917903_C_CT	0.129	0.0117	-0.704	0.128		NZ_LR130515	1917903	C	CT	ins	missense_variant	EW033_RS00100				0.166667	6
NZ_LR130515_1930128_ATTC_TTTT	0.16	0.0117	-0.764	0.128	arsB	NZ_LR130515	1930128	ATTC	TTTT	complex	missense_variant	EW033_RS09800		arsenite efflux transporter membrane subunit ArsB	L77F	0.142857	7	SAUSA300_1718	aresenical pump membrane protein	arsB	arsR-arsB-arsC
NZ_LR130515_1483100_A_T	0.561	0.0119	0.564	0.128		NZ_LR130515	1483100	A	T	snp	missense_variant	EW033_RS00100				0.0714286	14
NZ_LR130515_626574_CGCTAAAACTAGAAATGAA_TGCCAAGACAAGAGAAGAG	0.0491	0.012	0.707	0.128	folP	NZ_LR130515	626574	CGCTAAAACTAGAAATGAA	TGCCAAGACAAGAGAAGAG	complex	missense_variant	EW033_RS03225	folP	dihydropteroate synthase	N177E	0.0714286	14	SAUSA300_0492	dihydropteroate synthase	folP	folP-folB-folK
NZ_LR130515_2875595_TG_T	0.791	0.012	0.466	0.128	EW033_RS15255	NZ_LR130515	2875595	TG	T	del	missense_variant	EW033_RS15255		alpha/beta hydrolase	G89fs	0.5	2
NZ_LR130515_2900039_A_T	0.357	0.012	0.763	0.128	SAUSA300_2522	NZ_LR130515	2900039	A	T	snp	missense_variant	EW033_RS15385		DUF4176 domain-containing protein	D80E	0.142857	7	SAUSA300_2522	hypothetical protein	SAUSA300_2522	SAUSA300_2522-SAUSA300_2523-SAUSA300_2524
NZ_LR130515_1929536_CATTC_TATTT	0.0284	0.0121	-0.83	0.127		NZ_LR130515	1929536	CATTC	TATTT	complex	missense_variant	EW033_RS00100				0.125	8
NZ_LR130515_2124497_C_T	0.0103	0.0121	-1.42	0.127	SAUSA300_1928	NZ_LR130515	2124497	C	T	snp	missense_variant	EW033_RS11090		hypothetical protein	M37I	0.5	2	SAUSA300_1928	phi77 ORF002-like protein, phage minor structural protein	SAUSA300_1928	SAUSA300_1927-SAUSA300_1928-SAUSA300_1929-SAUSA300_1930
NZ_LR130515_2012783_A_AATG	0.165	0.0122	1.23	0.127		NZ_LR130515	2012783	A	AATG	ins	missense_variant	EW033_RS00100				0.5	2
NZ_LR130515_2012789_TAGTAATTATTCAT_GGA	0.165	0.0122	1.23	0.127		NZ_LR130515	2012789	TAGTAATTATTCAT	GGA	complex	missense_variant	EW033_RS00100				0.5	2
NZ_LR130515_2987095_TTGAGAGTTGGCTATA_CACTGAATTCGAAATG	0.116	0.0122	-0.962	0.127	sasA	NZ_LR130515	2987095	TTGAGAGTTGGCTATA	CACTGAATTCGAAATG	complex	missense_variant	EW033_RS15780	sasA	serine-rich repeat glycoprotein adhesin SasA	ANSQ942SNSV	0.25	4	SAUSA300_2589	cell wall anchor domain-containing protein	SAUSA300_2589
NZ_LR130515_1556968_C_T	0.0698	0.0123	-0.659	0.127	ebh	NZ_LR130515	1556968	C	T	snp	missense_variant	EW033_RS07955	ebh	hyperosmolarity resistance protein Ebh	E2836K	0.2	5	SAUSA300_1327	cell surface protein	SAUSA300_1327
NZ_LR130515_2430018_AT_A	0.0233	0.0123	-0.8	0.127		NZ_LR130515	2430018	AT	A	del	missense_variant	EW033_RS00100				0.25	4
NZ_LR130515_1458504_A_C	0.0956	0.0124	-1.08	0.127		NZ_LR130515	1458504	A	C	snp	missense_variant	EW033_RS00100				0.333333	3
NZ_LR130515_33049_CAAAG_TAAAA	0.0103	0.0125	-1.23	0.127		NZ_LR130515	33049	CAAAG	TAAAA	complex	missense_variant	EW033_RS00100				0.333333	3
NZ_LR130515_3005766_GTG_AT	0.0103	0.0125	-1.23	0.127		NZ_LR130515	3005766	GTG	AT	complex	missense_variant	EW033_RS15870-EW033_RS15875				0.5	2
NZ_LR130515_2715957_A_G	0.168	0.0126	-0.901	0.127		NZ_LR130515	2715957	A	G	snp	missense_variant	EW033_RS14455-EW033_RS14460				0.166667	6
NZ_LR130515_545068_GACGCAAAAA_AACAAGAAAG	0.0827	0.0127	-1.25	0.127	EW033_RS02810	NZ_LR130515	545068	GACGCAAAAA	AACAAGAAAG	complex	missense_variant	EW033_RS02810		tandem-type lipoprotein	Q216R	0.125	8
NZ_LR130515_2570332_C_T	0.0233	0.0127	0.913	0.127	SAUSA300_2248	NZ_LR130515	2570332	C	T	snp	missense_variant	EW033_RS13690		helix-turn-helix transcriptional regulator	S587N	0.5	2	SAUSA300_2248	AraC family transcriptional regulator	SAUSA300_2248	SAUSA300_2246-sarY-SAUSA300_2248
NZ_LR130515_2868565_A_C	0.713	0.0127	0.459	0.127	SAUSA300_2507	NZ_LR130515	2868565	A	C	snp	missense_variant	EW033_RS15200		PTS transporter subunit IIC	V144G	0.5	2	SAUSA300_2507	hypothetical protein	SAUSA300_2507
NZ_LR130515_2987893_TGAATAC_AGAAAAA	0.158	0.0127	-0.712	0.127	sasA	NZ_LR130515	2987893	TGAATAC	AGAAAAA	complex	missense_variant	EW033_RS15780	sasA	serine-rich repeat glycoprotein adhesin SasA	Y678F	0.125	8	SAUSA300_2589	cell wall anchor domain-containing protein	SAUSA300_2589
NZ_LR130515_299392_ACGCAGGGTATCAACG_GTAAATGGAATTAATA	0.478	0.0129	0.947	0.126	tarI'	NZ_LR130515	299392	ACGCAGGGTATCAACG	GTAAATGGAATTAATA	complex	missense_variant	EW033_RS01395		2-C-methyl-D-erythritol 4-phosphate cytidylyltransferase	TQGIND98VNGINN	0.25	4	SAUSA300_0245	2-C-methyl-D-erythritol 4-phosphate cytidylyltransferase	SAUSA300_0245	tarI'-tarJ'-tarL'
NZ_LR130515_1441818_G_T	0.0258	0.0129	0.893	0.126		NZ_LR130515	1441818	G	T	snp	missense_variant	EW033_RS00100				0.5	2
NZ_LR130515_2789535_ATACC_TTACT	0.0258	0.0129	0.893	0.126		NZ_LR130515	2789535	ATACC	TTACT	complex	missense_variant	EW033_RS14810-EW033_RS14815				0.5	2
NZ_LR130515_993478_GA_G	0.0517	0.013	-0.785	0.126		NZ_LR130515	993478	GA	G	del	missense_variant	EW033_RS00100				0.333333	3
NZ_LR130515_14096_C_T	0.0749	0.0131	-0.943	0.126		NZ_LR130515	14096	C	T	snp	missense_variant	EW033_RS00050-EW033_RS00055				0.0769231	13
NZ_LR130515_1101920_G_A	0.0775	0.0131	-0.891	0.126	EW033_RS05745	NZ_LR130515	1101920	G	A	snp	missense_variant	EW033_RS05745		hypothetical protein	W25*	0.142857	7
NZ_LR130515_2989692_CTGTG_TTGTA	0.0103	0.0131	-1.26	0.126	sasA	NZ_LR130515	2989692	CTGTG	TTGTA	complex	missense_variant	EW033_RS15780	sasA	serine-rich repeat glycoprotein adhesin SasA	V80I	0.5	2	SAUSA300_2589	cell wall anchor domain-containing protein	SAUSA300_2589
NZ_LR130515_3031528_ATATACTA_CTATGCTT	0.32	0.0131	0.471	0.126		NZ_LR130515	3031528	ATATACTA	CTATGCTT	complex	missense_variant	EW033_RS15995-EW033_RS16000				0.0384615	26
NZ_LR130515_444345_A_AT	0.7	0.0132	0.435	0.126	fepA	NZ_LR130515	444345	A	AT	ins	missense_variant	EW033_RS02240		hypothetical protein	Ter219fs	0.2	5	SAUSA300_0344	putative lipoprotein	SAUSA300_0344	fepA-fepB-fepC
NZ_LR130515_2497461_AG_CC	0.0594	0.0132	0.786	0.126	hysA	NZ_LR130515	2497461	AG	CC	complex	missense_variant	EW033_RS13190	hysA	hyaluronate lyase HysA	V623L	0.0625	16	SAUSA300_2161	hyaluronate lyase	hysA
NZ_LR130515_2986430_T_C	0.0568	0.0132	-0.737	0.126	sasA	NZ_LR130515	2986430	T	C	snp	missense_variant	EW033_RS15780	sasA	serine-rich repeat glycoprotein adhesin SasA	D1167G	0.2	5	SAUSA300_2589	cell wall anchor domain-containing protein	SAUSA300_2589
NZ_LR130515_630481_G_C	0.209	0.0133	0.974	0.126		NZ_LR130515	630481	G	C	snp	missense_variant	EW033_RS00100				0.5	2
NZ_LR130515_2760128_AT_TA	0.0362	0.0133	0.883	0.126	SAUSA300_2416	NZ_LR130515	2760128	AT	TA	mnp	missense_variant	EW033_RS14675		SDR family oxidoreductase	N63I	0.25	4	SAUSA300_2416	glucose 1-dehydrogenase-like protein	SAUSA300_2416
NZ_LR130515_13887_TAGG_GGGA	0.0181	0.0134	-0.924	0.126		NZ_LR130515	13887	TAGG	GGGA	complex	missense_variant	EW033_RS00050-EW033_RS00055				0.125	8
NZ_LR130515_586554_G_GT	0.0388	0.0135	0.588	0.125		NZ_LR130515	586554	G	GT	ins	missense_variant	EW033_RS00100				0.166667	6
NZ_LR130515_800343_TA_AG	0.39	0.0135	-0.408	0.125		NZ_LR130515	800343	TA	AG	mnp	missense_variant	EW033_RS00100				0.0344828	29
NZ_LR130515_2741179_T_C	0.77	0.0135	0.41	0.125		NZ_LR130515	2741179	T	C	snp	missense_variant	EW033_RS14575-EW033_RS14580				0.142857	7
NZ_LR130515_829650_AGAAAGGCAAGGC_TGATAGACAGGGA	0.209	0.0137	0.535	0.125	norA	NZ_LR130515	829650	AGAAAGGCAAGGC	TGATAGACAGGGA	complex	missense_variant	EW033_RS04310	norA	multidrug efflux MFS transporter NorA	E323D	0.0625	16	SAUSA300_0680	multi drug resistance protein	norA
NZ_LR130515_770108_G_A	0.0775	0.0138	-0.998	0.125		NZ_LR130515	770108	G	A	snp	missense_variant	EW033_RS00100				0.2	5
NZ_LR130515_2863251_G_A	0.791	0.0138	0.438	0.125	SAUSA300_2503	NZ_LR130515	2863251	G	A	snp	missense_variant	EW033_RS15185		CHAP domain-containing protein	R175W	0.5	2	SAUSA300_2503	secretory antigen precursor SsaA	SAUSA300_2503
NZ_LR130515_129416_G_A	0.116	0.0141	-0.593	0.125		NZ_LR130515	129416	G	A	snp	missense_variant	EW033_RS00100				0.0714286	14
NZ_LR130515_134286_G_A	0.0646	0.0141	-0.94	0.125		NZ_LR130515	134286	G	A	snp	missense_variant	EW033_RS00100				0.333333	3
NZ_LR130515_1205884_TAC_CAT	0.261	0.0141	-0.692	0.125	isdD	NZ_LR130515	1205884	TAC	CAT	complex	missense_variant	EW033_RS06295		hypothetical protein	T216I	0.333333	3	SAUSA300_1031	hypothetical protein	SAUSA300_1031	isdC-isdD-isdE-isdF
NZ_LR130515_469419_A_ACTTAATTAT	0.0491	0.0143	-0.709	0.124		NZ_LR130515	469419	A	ACTTAATTAT	ins	missense_variant	EW033_RS00100				0.0555556	18
NZ_LR130515_1247383_G_A	0.793	0.0144	0.443	0.124		NZ_LR130515	1247383	G	A	snp	missense_variant	EW033_RS00100				0.333333	3
NZ_LR130515_1808560_T_C	0.69	0.0144	0.445	0.124	lysP	NZ_LR130515	1808560	T	C	snp	missense_variant	EW033_RS09280		amino acid permease	I283V	0.333333	3	SAUSA300_1628	lysine-specific permease	lysP
NZ_LR130515_1787741_G_A	0.796	0.0145	0.451	0.124	comC	NZ_LR130515	1787741	G	A	snp	missense_variant	EW033_RS09165		prepilin peptidase	S153F	0.5	2	SAUSA300_1609	type III leader peptidase family protein	SAUSA300_1609	SAUSA300_1607-radC-comC
NZ_LR130515_1896805_G_A	0.0827	0.0145	-1.24	0.124		NZ_LR130515	1896805	G	A	snp	missense_variant	EW033_RS00100				0.333333	3
NZ_LR130515_123579_T_G	0.093	0.0146	-1.19	0.124	SAUSA300_0104	NZ_LR130515	123579	T	G	snp	missense_variant	EW033_RS00655		helix-turn-helix domain-containing protein	H451Q	0.5	2	SAUSA300_0104	AraC family transcriptional regulator	SAUSA300_0104
NZ_LR130515_859436_A_T	0.124	0.0146	0.964	0.124	opuBB	NZ_LR130515	859436	A	T	snp	missense_variant	EW033_RS04450		ABC transporter permease/substrate-binding protein	E315D	0.5	2	SAUSA300_0707	osmoprotectant ABC transporter permease	SAUSA300_0707	opuBA-opuBB
NZ_LR130515_14629_CCA_TCG	0.062	0.015	-0.933	0.124	SAUSA300_0010	NZ_LR130515	14629	CCA	TCG	complex	missense_variant	EW033_RS00055		AzlC family ABC transporter permease	P145S	0.333333	3	SAUSA300_0010	hypothetical protein	SAUSA300_0010	SAUSA300_0010-SAUSA300_0011
NZ_LR130515_865625_G_A	0.0904	0.015	-1.43	0.124		NZ_LR130515	865625	G	A	snp	missense_variant	EW033_RS00100				0.5	2
NZ_LR130515_2574266_T_C	0.0904	0.015	-1.43	0.124	nhaC	NZ_LR130515	2574266	T	C	snp	missense_variant	EW033_RS13705	nhaC	Na+/H+ antiporter NhaC	I358V	0.5	2	SAUSA300_2250	Na+/H+ antiporter NhaC	nhaC	nhaC-SAUSA300_2251
NZ_LR130515_2863932_TGGT_CGGG	0.447	0.015	0.746	0.124		NZ_LR130515	2863932	TGGT	CGGG	complex	missense_variant	EW033_RS15185-EW033_RS15190				0.166667	6
NZ_LR130515_1954684_A_T	0.235	0.0151	-0.624	0.123		NZ_LR130515	1954684	A	T	snp	missense_variant	EW033_RS00100				0.125	8
NZ_LR130515_3006802_A_T	0.297	0.0151	0.648	0.123	hisF	NZ_LR130515	3006802	A	T	snp	missense_variant	EW033_RS15880	hisF	imidazole glycerol phosphate synthase subunit HisF	L150M	0.25	4	SAUSA300_2606	imidazole glycerol phosphate synthase subunit HisF	hisF	hisI-hisF-hisA-hisH-hisB-SAUSA300_2610-hisD-hisG-hisZ
NZ_LR130515_170258_T_G	0.708	0.0152	0.324	0.123		NZ_LR130515	170258	T	G	snp	missense_variant	EW033_RS00100				0.037037	27
NZ_LR130515_978136_TGGC_CGGT	0.152	0.0152	0.828	0.123	EW033_RS05135	NZ_LR130515	978136	TGGC	CGGT	complex	missense_variant	EW033_RS05135		hypothetical protein	AI64TV	0.166667	6
NZ_LR130515_249510_A_T	0.475	0.0156	0.799	0.123		NZ_LR130515	249510	A	T	snp	missense_variant	EW033_RS00100				0.333333	3
NZ_LR130515_2789539_C_T	0.0491	0.0156	-0.811	0.123		NZ_LR130515	2789539	C	T	snp	missense_variant	EW033_RS14810-EW033_RS14815				0.333333	3
NZ_LR130515_2956450_C_T	0.305	0.0156	-0.468	0.123	EW033_RS15685	NZ_LR130515	2956450	C	T	snp	missense_variant	EW033_RS15685		hypothetical protein	C51Y	0.05	20
NZ_LR130515_782385_T_C	0.47	0.0157	0.514	0.123		NZ_LR130515	782385	T	C	snp	missense_variant	EW033_RS00100				0.0714286	14
NZ_LR130515_1178959_A_T	0.0724	0.0157	-0.958	0.123		NZ_LR130515	1178959	A	T	snp	missense_variant	EW033_RS00100				0.2	5
NZ_LR130515_1552276_CTACA_ATACT	0.0517	0.016	-0.828	0.122	ebh	NZ_LR130515	1552276	CTACA	ATACT	complex	missense_variant	EW033_RS07955	ebh	hyperosmolarity resistance protein Ebh	A4400S	0.333333	3	SAUSA300_1327	cell surface protein	SAUSA300_1327
NZ_LR130515_1953366_A_T	0.0517	0.016	-0.828	0.122	SAUSA300_1740	NZ_LR130515	1953366	A	T	snp	missense_variant	EW033_RS09925		DUF4352 domain-containing protein	K285N	0.5	2	SAUSA300_1740	hypothetical protein	SAUSA300_1740
NZ_LR130515_1954105_A_T	0.0517	0.016	-0.828	0.122	SAUSA300_1742	NZ_LR130515	1954105	A	T	snp	missense_variant	EW033_RS09930		hypothetical protein	I175L	0.5	2	SAUSA300_1742	hypothetical protein	SAUSA300_1742	SAUSA300_1741-SAUSA300_1742-SAUSA300_1743
NZ_LR130515_1954460_GCG_TCA	0.0517	0.016	-0.828	0.122	SAUSA300_1743	NZ_LR130515	1954460	GCG	TCA	complex	missense_variant	EW033_RS09935		DUF3969 family protein	A71S	0.333333	3	SAUSA300_1743	hypothetical protein	SAUSA300_1743	SAUSA300_1741-SAUSA300_1742-SAUSA300_1743
NZ_LR130515_1954974_GACGT_AATTA	0.0517	0.016	-0.828	0.122	SAUSA300_1744	NZ_LR130515	1954974	GACGT	AATTA	complex	missense_variant	EW033_RS09940		hypothetical protein	DV95NY	0.2	5	SAUSA300_1744	hypothetical protein	SAUSA300_1744
NZ_LR130515_285776_T_TA	0.483	0.0161	0.909	0.122		NZ_LR130515	285776	T	TA	ins	missense_variant	EW033_RS00100				0.25	4
NZ_LR130515_800334_AGGA_TGT	0.0672	0.0162	-0.877	0.122		NZ_LR130515	800334	AGGA	TGT	complex	missense_variant	EW033_RS00100				0.0833333	12
NZ_LR130515_229961_G_A	0.0698	0.0167	0.742	0.122		NZ_LR130515	229961	G	A	snp	missense_variant	EW033_RS00100				0.5	2
NZ_LR130515_1954040_CAGATGG_TGGATAA	0.217	0.0168	-0.584	0.122	SAUSA300_1742	NZ_LR130515	1954040	CAGATGG	TGGATAA	complex	missense_variant	EW033_RS09930		hypothetical protein	TDG153MDN	0.142857	7	SAUSA300_1742	hypothetical protein	SAUSA300_1742	SAUSA300_1741-SAUSA300_1742-SAUSA300_1743
NZ_LR130515_475537_G_A	0.566	0.0169	0.387	0.121		NZ_LR130515	475537	G	A	snp	missense_variant	EW033_RS00100				0.142857	7
NZ_LR130515_1354191_T_C	0.196	0.0171	0.431	0.121		NZ_LR130515	1354191	T	C	snp	missense_variant	EW033_RS00100				0.5	2
NZ_LR130515_1362862_A_G	0.196	0.0171	0.431	0.121	pnpA	NZ_LR130515	1362862	A	G	snp	missense_variant	EW033_RS07080	pnp	polyribonucleotide nucleotidyltransferase	I186V	0.5	2	SAUSA300_1167	polynucleotide phosphorylase/polyadenylase	pnpA
NZ_LR130515_311147_CGTGA_TGTGT	0.0568	0.0174	0.749	0.121		NZ_LR130515	311147	CGTGA	TGTGT	complex	missense_variant	EW033_RS00100				0.1	10
NZ_LR130515_134090_C_T	0.793	0.0175	0.437	0.121		NZ_LR130515	134090	C	T	snp	missense_variant	EW033_RS00100				0.333333	3
NZ_LR130515_2965820_A_C	0.189	0.0176	-0.913	0.121		NZ_LR130515	2965820	A	C	snp	missense_variant	EW033_RS15720-EW033_RS15725				0.25	4
NZ_LR130515_914901_A_G	0.0827	0.0177	-1.18	0.121		NZ_LR130515	914901	A	G	snp	missense_variant	EW033_RS00100				0.333333	3
NZ_LR130515_2024263_T_C	0.0672	0.0177	-0.839	0.121		NZ_LR130515	2024263	T	C	snp	missense_variant	EW033_RS00100				0.2	5
NZ_LR130515_2663950_C_T	0.488	0.0177	0.687	0.12		NZ_LR130515	2663950	C	T	snp	missense_variant	EW033_RS14155-EW033_RS14160				0.125	8
NZ_LR130515_2457847_A_CC	0.0465	0.0179	-0.787	0.12	lmrS	NZ_LR130515	2457847	A	CC	complex	missense_variant	EW033_RS13000	lmrS	multidrug efflux MFS transporter LmrS	A115fs	0.5	2	SAUSA300_2126	EmrB/QacA family drug resistance transporter	SAUSA300_2126
NZ_LR130515_1664908_ATAAAAAAACGGAAGCACTTGTAGGTAAAATAGTCTACGTGCTTCCATTTTTTATTC_A	0.0129	0.0181	-0.972	0.12		NZ_LR130515	1664908	ATAAAAAAACGGAAGCACTTGTAGGTAAAATAGTCTACGTGCTTCCATTTTTTATTC	A	del	missense_variant	EW033_RS00100				0.25	4
NZ_LR130515_2696160_A_G	0.178	0.0182	0.7	0.12		NZ_LR130515	2696160	A	G	snp	missense_variant	EW033_RS14340-EW033_RS14345				0.2	5
NZ_LR130515_29135_TTGCGTCCTAACA_CTGTGTCTCCAACG	0.0672	0.0183	-0.69	0.12		NZ_LR130515	29135	TTGCGTCCTAACA	CTGTGTCTCCAACG	complex	missense_variant	EW033_RS00100				0.333333	3
NZ_LR130515_1402546_A_G	0.287	0.0184	0.604	0.12		NZ_LR130515	1402546	A	G	snp	missense_variant	EW033_RS00100				0.0666667	15
NZ_LR130515_1201095_T_A	0.0853	0.0185	-0.698	0.12		NZ_LR130515	1201095	T	A	snp	missense_variant	EW033_RS00100				0.142857	7
NZ_LR130515_639861_G_C	0.137	0.0186	-0.875	0.12		NZ_LR130515	639861	G	C	snp	missense_variant	EW033_RS00100				0.25	4
NZ_LR130515_2917378_G_A	0.137	0.0186	-0.875	0.12	EW033_RS15485	NZ_LR130515	2917378	G	A	snp	missense_variant	EW033_RS15485		hypothetical protein	M130I	0.25	4
NZ_LR130515_2942566_T_A	0.656	0.0186	0.971	0.12		NZ_LR130515	2942566	T	A	snp	missense_variant	EW033_RS15615-EW033_RS15620				0.5	2
NZ_LR130515_161913_ACGATCTAAT_GCGAGCTAGC	0.473	0.0187	0.908	0.12	SAUSA300_0137	NZ_LR130515	161913	ACGATCTAAT	GCGAGCTAGC	complex	missense_variant	EW033_RS00820		GntR family transcriptional regulator	D100A	0.25	4	SAUSA300_0137	GntR family transcriptional regulator	SAUSA300_0137
NZ_LR130515_1391967_T_A	0.796	0.0187	0.434	0.119	glpP	NZ_LR130515	1391967	T	A	snp	missense_variant	EW033_RS07200		glycerol-3-phosphate responsive antiterminator	L142Q	0.5	2	SAUSA300_1190	glycerol uptake operon antiterminator regulatory protein	glpP	mutS-mutL-glpP
NZ_LR130515_3001337_GTT_ATC	0.473	0.0187	0.908	0.12	icaC	NZ_LR130515	3001337	GTT	ATC	complex	missense_variant	EW033_RS15860		acyltransferase family protein	V21I	0.25	4	SAUSA300_2602	intercellular adhesion protein C	icaC	icaB-icaC
NZ_LR130515_8938_A_T	0.0388	0.0188	-1.06	0.119	gyrA	NZ_LR130515	8938	A	T	snp	missense_variant	EW033_RS00030	gyrA	DNA gyrase subunit A	E817V	0.5	2	SAUSA300_0006	DNA gyrase subunit A	gyrA	SAUSA300_0003-recF-gyrB-gyrA
NZ_LR130515_124440_GCAAATTT_ACAATTTA	0.0388	0.0188	-1.06	0.119		NZ_LR130515	124440	GCAAATTT	ACAATTTA	complex	missense_variant	EW033_RS00100				0.5	2
NZ_LR130515_1618853_A_G	0.744	0.0188	0.355	0.119		NZ_LR130515	1618853	A	G	snp	missense_variant	EW033_RS00100				0.0625	16
NZ_LR130515_2669272_T_TAA	0.0724	0.0188	-0.835	0.119		NZ_LR130515	2669272	T	TAA	ins	missense_variant	EW033_RS14190-EW033_RS14195				0.111111	9
NZ_LR130515_2978156_T_C	0.0388	0.0188	-1.06	0.119	secA2	NZ_LR130515	2978156	T	C	snp	missense_variant	EW033_RS15755	secA2	accessory Sec system translocase SecA2	E369G	0.5	2	SAUSA300_2584	preprotein translocase subunit SecA	SAUSA300_2584	gtfB-gtfA-secA2-asp3-asp2-asp1-secY2
NZ_LR130515_2983125_AATTTGGT_TATTCGGC	0.0388	0.0188	-1.06	0.119	asp1	NZ_LR130515	2983125	AATTTGGT	TATTCGGC	complex	missense_variant	EW033_RS15770	asp1	accessory Sec system protein Asp1	L59I	0.5	2	SAUSA300_2587	accessory secretory protein Asp1	SAUSA300_2587	gtfB-gtfA-secA2-asp3-asp2-asp1-secY2
NZ_LR130515_2983165_GTC_ATT	0.0388	0.0188	-1.06	0.119	asp1	NZ_LR130515	2983165	GTC	ATT	complex	missense_variant	EW033_RS15770	asp1	accessory Sec system protein Asp1	D45N	0.5	2	SAUSA300_2587	accessory secretory protein Asp1	SAUSA300_2587	gtfB-gtfA-secA2-asp3-asp2-asp1-secY2
NZ_LR130515_2984525_G_A	0.0388	0.0188	-1.06	0.119		NZ_LR130515	2984525	G	A	snp	missense_variant	EW033_RS15775-EW033_RS15780				0.5	2
NZ_LR130515_2984563_T_A	0.0388	0.0188	-1.06	0.119		NZ_LR130515	2984563	T	A	snp	missense_variant	EW033_RS15775-EW033_RS15780				0.2	5
NZ_LR130515_2987557_AGTAGATACCACAATCGATCCT_TGTTGAAGTCATTATTGAACCA	0.0388	0.0188	-1.06	0.119	sasA	NZ_LR130515	2987557	AGTAGATACCACAATCGATCCT	TGTTGAAGTCATTATTGAACCA	complex	missense_variant	EW033_RS15780	sasA	serine-rich repeat glycoprotein adhesin SasA	VV788MT	0.333333	3	SAUSA300_2589	cell wall anchor domain-containing protein	SAUSA300_2589
NZ_LR130515_2994749_C_T	0.0388	0.0188	-1.06	0.119	SAUSA300_2595	NZ_LR130515	2994749	C	T	snp	missense_variant	EW033_RS15820		GNAT family N-acetyltransferase	A77T	0.2	5	SAUSA300_2595	acetyltransferase	SAUSA300_2595	msrA3-SAUSA300_2595
NZ_LR130515_3011047_C_T	0.0388	0.0188	-1.06	0.119	hisD	NZ_LR130515	3011047	C	T	snp	missense_variant	EW033_RS15905		histidinol dehydrogenase	E100K	0.5	2	SAUSA300_2611	histidinol dehydrogenase	hisD	hisI-hisF-hisA-hisH-hisB-SAUSA300_2610-hisD-hisG-hisZ
NZ_LR130515_3011477_TTAGC_CTAGA	0.0388	0.0188	-1.06	0.119	hisG	NZ_LR130515	3011477	TTAGC	CTAGA	complex	missense_variant	EW033_RS15910		ATP phosphoribosyltransferase	K159E	0.5	2	SAUSA300_2612	ATP phosphoribosyltransferase catalytic subunit	hisG	hisI-hisF-hisA-hisH-hisB-SAUSA300_2610-hisD-hisG-hisZ
NZ_LR130515_3011600_TTTCA_CTTCG	0.0388	0.0188	-1.06	0.119	hisG	NZ_LR130515	3011600	TTTCA	CTTCG	complex	missense_variant	EW033_RS15910		ATP phosphoribosyltransferase	T118A	0.5	2	SAUSA300_2612	ATP phosphoribosyltransferase catalytic subunit	hisG	hisI-hisF-hisA-hisH-hisB-SAUSA300_2610-hisD-hisG-hisZ
NZ_LR130515_3020195_GTCA_ATCT	0.0388	0.0188	-1.06	0.119	drp35	NZ_LR130515	3020195	GTCA	ATCT	complex	missense_variant	EW033_RS15955		SMP-30/gluconolactonase/LRE family protein	S240R	0.25	4	SAUSA300_2621	hypothetical protein	SAUSA300_2621
NZ_LR130515_3020684_CCGC_TTGT	0.0388	0.0188	-1.06	0.119	drp35	NZ_LR130515	3020684	CCGC	TTGT	complex	missense_variant	EW033_RS15955		SMP-30/gluconolactonase/LRE family protein	R78Q	0.25	4	SAUSA300_2621	hypothetical protein	SAUSA300_2621
NZ_LR130515_3048239_CCTCT_ACTCC	0.0388	0.0188	-1.06	0.119		NZ_LR130515	3048239	CCTCT	ACTCC	complex	missense_variant	EW033_RS16085-EW033_RS16090				0.142857	7
NZ_LR130515_2997686_A_G	0.15	0.0192	-0.689	0.119		NZ_LR130515	2997686	A	G	snp	missense_variant	EW033_RS15835-EW033_RS15840				0.142857	7
NZ_LR130515_1383760_A_G	0.0465	0.0193	-0.779	0.119	SAUSA300_1184	NZ_LR130515	1383760	A	G	snp	missense_variant	EW033_RS07170		thiamine-binding protein	I8V	0.333333	3	SAUSA300_1184	hypothetical protein	SAUSA300_1184
NZ_LR130515_2011389_G_C	0.132	0.0193	-0.945	0.119	airS	NZ_LR130515	2011389	G	C	snp	missense_variant	EW033_RS10315		GAF domain-containing sensor histidine kinase	R88G	0.25	4	SAUSA300_1799	putative sensor histidine kinase	SAUSA300_1799	airR-airS
NZ_LR130515_2099247_G_GC	0.669	0.0197	0.389	0.119		NZ_LR130515	2099247	G	GC	ins	missense_variant	EW033_RS00100				0.25	4
NZ_LR130515_523741_TATAAG_CATATA	0.0827	0.0198	-1.16	0.118		NZ_LR130515	523741	TATAAG	CATATA	complex	missense_variant	EW033_RS00100				0.333333	3
NZ_LR130515_2554859_T_C	0.512	0.0198	0.422	0.118	modA	NZ_LR130515	2554859	T	C	snp	missense_variant	EW033_RS13595	modA	molybdate ABC transporter substrate-binding protein	N112D	0.5	2	SAUSA300_2230	molybdenum ABC transporter molybdenum-binding protein ModA	modA	modC-modB-modA
NZ_LR130515_272513_T_C	0.426	0.0199	0.67	0.118		NZ_LR130515	272513	T	C	snp	missense_variant	EW033_RS00100				0.142857	7
NZ_LR130515_423201_GCTTC_TTTTT	0.372	0.0199	0.847	0.118	SAUSA300_0321	NZ_LR130515	423201	GCTTC	TTTTT	complex	missense_variant	EW033_RS02120		alpha/beta hydrolase	H25N	0.333333	3	SAUSA300_0321	hypothetical protein	SAUSA300_0321	SAUSA300_0321-SAUSA300_0322
NZ_LR130515_2173916_TTGGCTTTGGTTTATC_T	0.0827	0.0199	0.642	0.118	sdrH	NZ_LR130515	2173916	TTGGCTTTGGTTTATC	T	del	missense_variant	EW033_RS11450		hypothetical protein	D174_P178del	0.166667	6	SAUSA300_1985	serine-aspartate repeat-containing protein SdrH	sdrH
NZ_LR130515_119677_A_G	0.0801	0.02	-0.787	0.118	SAUSA300_0098	NZ_LR130515	119677	A	G	snp	missense_variant	EW033_RS00640		hypothetical protein	E83G	0.2	5	SAUSA300_0098	hypothetical protein	SAUSA300_0098
NZ_LR130515_119689_A_G	0.0801	0.02	-0.787	0.118	SAUSA300_0098	NZ_LR130515	119689	A	G	snp	missense_variant	EW033_RS00640		hypothetical protein	K87R	0.25	4	SAUSA300_0098	hypothetical protein	SAUSA300_0098
NZ_LR130515_271253_TCAACCGACGACAC_AAACCCACCGTTAA	0.137	0.0201	0.569	0.118	EW033_RS01260	NZ_LR130515	271253	TCAACCGACGACAC	AAACCCACCGTTAA	complex	missense_variant	EW033_RS01260	coa	staphylocoagulase	QPTTP409NPPLT	0.0416667	24
NZ_LR130515_1066299_GCCA_ACCAT	0.0801	0.0201	1.24	0.118	SAUSA300_0900	NZ_LR130515	1066299	GCCA	ACCAT	complex	missense_variant	EW033_RS05565		competence protein	F85fs	0.333333	3	SAUSA300_0900	putative competence protein	SAUSA300_0900	SAUSA300_0900-trfB-pepF
NZ_LR130515_1443726_A_G	0.0801	0.0201	1.24	0.118		NZ_LR130515	1443726	A	G	snp	missense_variant	EW033_RS00100				0.333333	3
NZ_LR130515_788342_AAATTC_TAAGTT	0.0775	0.0203	-0.943	0.118		NZ_LR130515	788342	AAATTC	TAAGTT	complex	missense_variant	EW033_RS00100				0.1	10
NZ_LR130515_145483_T_C	0.0491	0.0206	-0.787	0.118	sbnE	NZ_LR130515	145483	T	C	snp	missense_variant	EW033_RS00740	sbnE	L-2,3-diaminopropanoate--citrate ligase SbnE	Y12H	0.5	2	SAUSA300_0122	IucA/IucC family siderophore biosynthesis protein	SAUSA300_0122	sbnA-sbnB-sbnC-sbnD-sbnE-sbnF-sbnG-sbnH-sbnI
NZ_LR130515_154811_A_G	0.0491	0.0206	-0.787	0.118	SAUSA300_0131	NZ_LR130515	154811	A	G	snp	missense_variant	EW033_RS00790		sugar transferase	H20R	0.5	2	SAUSA300_0131	putative sugar transferase	SAUSA300_0131	galE-SAUSA300_0131
NZ_LR130515_155829_G_A	0.0491	0.0206	-0.787	0.118	SAUSA300_0132	NZ_LR130515	155829	G	A	snp	missense_variant	EW033_RS00795		glycosyltransferase family 4 protein	G60S	0.5	2	SAUSA300_0132	glycosyl transferase, group 1 family protein	SAUSA300_0132	SAUSA300_0132-SAUSA300_0133-SAUSA300_0134
NZ_LR130515_158406_C_A	0.0491	0.0206	-0.787	0.118	SAUSA300_0134	NZ_LR130515	158406	C	A	snp	missense_variant	EW033_RS00805		lipopolysaccharide biosynthesis protein	A127E	0.5	2	SAUSA300_0134	polysaccharide extrusion protein	SAUSA300_0134	SAUSA300_0132-SAUSA300_0133-SAUSA300_0134
NZ_LR130515_180439_A_G	0.0491	0.0206	-0.787	0.118	capC	NZ_LR130515	180439	A	G	snp	missense_variant	EW033_RS00905		tyrosine-protein phosphatase	I37V	0.5	2	SAUSA300_0154	capsular polysaccharide biosynthesis protein Cap5C	cap5C	capA-capB-capC-capD-capE-capF-capG-capH-capI-capJ-capK-capL-capM-capN-capO-capP
NZ_LR130515_199883_G_T	0.0491	0.0206	-0.787	0.118		NZ_LR130515	199883	G	T	snp	missense_variant	EW033_RS00100				0.5	2
NZ_LR130515_200973_C_T	0.0491	0.0206	-0.787	0.118	SAUSA300_0171	NZ_LR130515	200973	C	T	snp	missense_variant	EW033_RS01000		cation transporter	P198S	0.5	2	SAUSA300_0171	cation efflux family protein	SAUSA300_0171
NZ_LR130515_214490_G_C	0.0491	0.0206	-0.787	0.118	ausA	NZ_LR130515	214490	G	C	snp	missense_variant	EW033_RS01050		non-ribosomal peptide synthetase	R1489P	0.5	2	SAUSA300_0181	non-ribosomal peptide synthetase	SAUSA300_0181	ausA-SAUSA300_0182
NZ_LR130515_217217_C_A	0.0491	0.0206	-0.787	0.118	SAUSA300_0182	NZ_LR130515	217217	C	A	snp	missense_variant	EW033_RS01055		4'-phosphopantetheinyl transferase superfamily protein	T2K	0.5	2	SAUSA300_0182	4'-phosphopantetheinyl transferase superfamily protein	SAUSA300_0182	ausA-SAUSA300_0182
NZ_LR130515_221315_T_C	0.0491	0.0206	-0.787	0.118	argC	NZ_LR130515	221315	T	C	snp	missense_variant	EW033_RS01075		N-acetyl-gamma-glutamyl-phosphate reductase	T236A	0.5	2	SAUSA300_0186	N-acetyl-gamma-glutamyl-phosphate reductase	argC	argB-argJ-argC-argD
NZ_LR130515_283994_G_A	0.0491	0.0206	-0.787	0.118	opp-5A	NZ_LR130515	283994	G	A	snp	missense_variant	EW033_RS01305		ABC transporter substrate-binding protein	P276L	0.5	2	SAUSA300_0231	ABC transporter substrate-binding protein	SAUSA300_0231
NZ_LR130515_287630_A_G	0.0491	0.0206	-0.787	0.118	ldh1	NZ_LR130515	287630	A	G	snp	missense_variant	EW033_RS01335		L-lactate dehydrogenase	T41A	0.5	2	SAUSA300_0235	L-lactate dehydrogenase	SAUSA300_0235
NZ_LR130515_290900_C_T	0.0491	0.0206	-0.787	0.118	SAUSA300_0237	NZ_LR130515	290900	C	T	snp	missense_variant	EW033_RS01350		nucleoside hydrolase	P75L	0.5	2	SAUSA300_0237	inosine-uridine preferring nucleoside hydrolase	SAUSA300_0237
NZ_LR130515_293369_C_T	0.0491	0.0206	-0.787	0.118	SAUSA300_0238	NZ_LR130515	293369	C	T	snp	missense_variant	EW033_RS01360		transcription antiterminator	R474*	0.5	2	SAUSA300_0238	BglG family transcriptional antiterminator	SAUSA300_0238	SAUSA300_0238-SAUSA300_0239-SAUSA300_0240
NZ_LR130515_335637_G_T	0.0491	0.0206	-0.787	0.118	SAUSA300_0277	NZ_LR130515	335637	G	T	snp	missense_variant	EW033_RS01565		CHAP domain-containing protein	A225E	0.5	2	SAUSA300_0277	putative staphyloxanthin biosynthesis protein	SAUSA300_0277
NZ_LR130515_362936_C_A	0.0491	0.0206	-0.787	0.118	SAUSA300_0308	NZ_LR130515	362936	C	A	snp	missense_variant	EW033_RS01725		ABC transporter permease	N11K	0.5	2	SAUSA300_0308	ABC transporter permease	SAUSA300_0308	SAUSA300_0308-SAUSA300_0309
NZ_LR130515_368786_G_A	0.0491	0.0206	-0.787	0.118	SAUSA300_0313	NZ_LR130515	368786	G	A	snp	missense_variant	EW033_RS01755		NupC/NupG family nucleoside CNT transporter	A179T	0.5	2	SAUSA300_0313	putative nucleoside permease NupC	SAUSA300_0313	SAUSA300_0311-psuG-SAUSA300_0313
NZ_LR130515_481581_A_G	0.0491	0.0206	-0.787	0.118	SAUSA300_0383	NZ_LR130515	481581	A	G	snp	missense_variant	EW033_RS02470		hypothetical protein	S240P	0.5	2	SAUSA300_0383	hypothetical protein	SAUSA300_0383	SAUSA300_0383-SAUSA300_0384-SAUSA300_0385
NZ_LR130515_485359_G_A	0.0491	0.0206	-0.787	0.118	pbuX	NZ_LR130515	485359	G	A	snp	missense_variant	EW033_RS02490		purine permease	R214K	0.5	2	SAUSA300_0387	xanthine permease	pbuX	xpt-pbuX-guaB-guaA
NZ_LR130515_554770_C_T	0.0491	0.0206	-0.787	0.118	mpsB	NZ_LR130515	554770	C	T	snp	missense_variant	EW033_RS02870		YbcC family protein	A542V	0.5	2	SAUSA300_0426	hypothetical protein	SAUSA300_0426	mpsA-mpsB
NZ_LR130515_585541_G_A	0.0491	0.0206	-0.787	0.118	recR	NZ_LR130515	585541	G	A	snp	missense_variant	EW033_RS03020	recR	recombination protein RecR	D12N	0.5	2	SAUSA300_0454	recombination protein RecR	recR	SAUSA300_0453-recR
NZ_LR130515_596181_T_G	0.0491	0.0206	-0.787	0.118	holB	NZ_LR130515	596181	T	G	snp	missense_variant	EW033_RS03065		DNA polymerase III subunit delta'	I263S	0.5	2	SAUSA300_0461	DNA polymerase III subunit delta	holB	holB-SAUSA300_0462-SAUSA300_0463
NZ_LR130515_616744_A_G	0.0491	0.0206	-0.787	0.118	SAUSA300_0482	NZ_LR130515	616744	A	G	snp	missense_variant	EW033_RS03175		polysaccharide biosynthesis protein	I463V	0.5	2	SAUSA300_0482	polysaccharide biosynthesis protein	SAUSA300_0482	rplY-pth-mfd-SAUSA300_0482-SAUSA300_0483-SAUSA300_0484-divIC
NZ_LR130515_647877_A_T	0.0491	0.0206	-0.787	0.118	SAUSA300_0512	NZ_LR130515	647877	A	T	snp	missense_variant	EW033_RS03360		PIN/TRAM domain-containing protein	K63I	0.5	2	SAUSA300_0512	PilT domain-containing protein	SAUSA300_0512	radA-SAUSA300_0512
NZ_LR130515_676448_GGA_AGT	0.0491	0.0206	-0.787	0.118	hchA	NZ_LR130515	676448	GGA	AGT	complex	missense_variant	EW033_RS03495	hchA	protein deglycase HchA	G247S	0.5	2	SAUSA300_0536	chaperone protein HchA	SAUSA300_0536
NZ_LR130515_678106_G_A	0.0491	0.0206	-0.787	0.118	araB	NZ_LR130515	678106	G	A	snp	missense_variant	EW033_RS03500		ribulokinase	A454T	0.5	2	SAUSA300_0537	ribulokinase	SAUSA300_0537
NZ_LR130515_700060_CG_TA	0.0491	0.0206	-0.787	0.118	SAUSA300_0550	NZ_LR130515	700060	CG	TA	complex	missense_variant	EW033_RS03575		glycosyltransferase	A34V	0.5	2	SAUSA300_0550	glycosyl transferase, group 1 family protein	SAUSA300_0550
NZ_LR130515_707281_C_T	0.0491	0.0206	-0.787	0.118	proP	NZ_LR130515	707281	C	T	snp	missense_variant	EW033_RS03615		MFS transporter	A451V	0.5	2	SAUSA300_0558	putative proline/betaine transporter	SAUSA300_0558
NZ_LR130515_713675_T_C	0.0491	0.0206	-0.787	0.118	SAUSA300_0564	NZ_LR130515	713675	T	C	snp	missense_variant	EW033_RS03660		DUF5327 family protein	S43P	0.5	2	SAUSA300_0564	hypothetical protein	SAUSA300_0564	ung-SAUSA300_0564
NZ_LR130515_713991_C_T	0.0491	0.0206	-0.787	0.118		NZ_LR130515	713991	C	T	snp	missense_variant	EW033_RS00100				0.5	2
NZ_LR130515_715365_C_T	0.0491	0.0206	-0.787	0.118	SAUSA300_0566	NZ_LR130515	715365	C	T	snp	missense_variant	EW033_RS03670		APC family permease	S272L	0.5	2	SAUSA300_0566	amino acid permease	SAUSA300_0566
NZ_LR130515_716811_G_C	0.0491	0.0206	-0.787	0.118	SAUSA300_0568	NZ_LR130515	716811	G	C	snp	missense_variant	EW033_RS03680		threonine/serine exporter ThrE family protein	T199S	0.5	2	SAUSA300_0568	hypothetical protein	SAUSA300_0568	SAUSA300_0567-SAUSA300_0568
NZ_LR130515_771239_T_A	0.0491	0.0206	-0.787	0.118	tagH	NZ_LR130515	771239	T	A	snp	missense_variant	EW033_RS04010	tagH	teichoic acids export ABC transporter ATP-binding subunit TagH	K185N	0.5	2	SAUSA300_0624	teichoic acids export protein ATP-binding subunit	tagH
NZ_LR130515_781527_T_C	0.0491	0.0206	-0.787	0.118	SAUSA300_0632	NZ_LR130515	781527	T	C	snp	missense_variant	EW033_RS04055		YitT family protein	V61A	0.5	2	SAUSA300_0632	hypothetical protein	SAUSA300_0632
NZ_LR130515_785786_CACCT_TACCA	0.0491	0.0206	-0.787	0.118	dhaK	NZ_LR130515	785786	CACCT	TACCA	complex	missense_variant	EW033_RS04075	dhaK	dihydroxyacetone kinase subunit DhaK	T81I	0.5	2	SAUSA300_0636	dihydroxyacetone kinase subunit DhaK	SAUSA300_0636	dhaK-dhaL-dhaM-SAUSA300_0639
NZ_LR130515_789481_G_A	0.0491	0.0206	-0.787	0.118	SAUSA300_0640	NZ_LR130515	789481	G	A	snp	missense_variant	EW033_RS04095		membrane protein	V307I	0.5	2	SAUSA300_0640	hypothetical protein	SAUSA300_0640
NZ_LR130515_812114_T_C	0.0491	0.0206	-0.787	0.118		NZ_LR130515	812114	T	C	snp	missense_variant	EW033_RS00100				0.5	2
NZ_LR130515_881622_A_G	0.0491	0.0206	-0.787	0.118	pepT	NZ_LR130515	881622	A	G	snp	missense_variant	EW033_RS04580	pepT	peptidase T	I404T	0.5	2	SAUSA300_0727	peptidase T	pepT	pepT-SAUSA300_0728-SAUSA300_0729
NZ_LR130515_946153_G_A	0.0491	0.0206	-0.787	0.118	SAUSA300_0784	NZ_LR130515	946153	G	A	snp	missense_variant	EW033_RS04905		amino acid transporter	L53F	0.5	2	SAUSA300_0784	LysE/YggA family protein	SAUSA300_0784
NZ_LR130515_1004956_C_T	0.0491	0.0206	-0.787	0.118	mnhD	NZ_LR130515	1004956	C	T	snp	missense_variant	EW033_RS05305		Na+/H+ antiporter subunit D	A261T	0.5	2	SAUSA300_0852	putative monovalent cation/H+ antiporter subunit D	mnhD	mnhG-mnhF-mnhE-mnhD-mnhC-mnhB-mnhA
NZ_LR130515_1011858_G_T	0.0491	0.0206	-0.787	0.118	SAUSA300_0859	NZ_LR130515	1011858	G	T	snp	missense_variant	EW033_RS05340		NADH-dependent flavin oxidoreductase	A213S	0.5	2	SAUSA300_0859	NADH-dependent flavin oxidoreductase	SAUSA300_0859
NZ_LR130515_1013378_C_G	0.0491	0.0206	-0.787	0.118	rocD	NZ_LR130515	1013378	C	G	snp	missense_variant	EW033_RS05345		ornithine--oxo-acid transaminase	T241R	0.5	2	SAUSA300_0860	ornithine--oxo-acid transaminase	rocD	rocD-gudB
NZ_LR130515_1030999_C_A	0.0491	0.0206	-0.787	0.118	SAUSA300_0871	NZ_LR130515	1030999	C	A	snp	missense_variant	EW033_RS05405		fumarylacetoacetate hydrolase family protein	T132K	0.5	2	SAUSA300_0871	hypothetical protein	SAUSA300_0871
NZ_LR130515_1110754_C_T	0.0491	0.0206	-0.787	0.118	menA	NZ_LR130515	1110754	C	T	snp	missense_variant	EW033_RS05810		1,4-dihydroxy-2-naphthoate polyprenyltransferase	A307T	0.5	2	SAUSA300_0944	1,4-dihydroxy-2-naphthoate octaprenyltransferase	menA
NZ_LR130515_1117230_C_G	0.0491	0.0206	-0.787	0.118	sspB	NZ_LR130515	1117230	C	G	snp	missense_variant	EW033_RS05845	sspB	cysteine protease staphopain B	G346A	0.5	2	SAUSA300_0950	cysteine protease	sspB	sspC-sspB-sspA
NZ_LR130515_1132728_T_C	0.0491	0.0206	-0.787	0.118	qoxB	NZ_LR130515	1132728	T	C	snp	missense_variant	EW033_RS05910	qoxB	cytochrome aa3 quinol oxidase subunit I	D557G	0.5	2	SAUSA300_0962	quinol oxidase, subunit I	qoxB	qoxD-qoxC-qoxB-qoxA
NZ_LR130515_1135974_T_G	0.0491	0.0206	-0.787	0.118		NZ_LR130515	1135974	T	G	snp	missense_variant	EW033_RS00100				0.333333	3
NZ_LR130515_1138379_T_C	0.0491	0.0206	-0.787	0.118	purE	NZ_LR130515	1138379	T	C	snp	missense_variant	EW033_RS05940	purE	5-(carboxyamino)imidazole ribonucleotide mutase	M43T	0.5	2	SAUSA300_0966	phosphoribosylaminoimidazole carboxylase, catalytic subunit	purE	purE-purK-purC-purS-purQ-purL-purF-purM-purN-purH-purD
NZ_LR130515_1143941_T_C	0.0491	0.0206	-0.787	0.118	purF	NZ_LR130515	1143941	T	C	snp	missense_variant	EW033_RS05970		amidophosphoribosyltransferase	F98L	0.5	2	SAUSA300_0972	amidophosphoribosyltransferase	purF	purE-purK-purC-purS-purQ-purL-purF-purM-purN-purH-purD
NZ_LR130515_1151899_T_C	0.0491	0.0206	-0.787	0.118	thiW	NZ_LR130515	1151899	T	C	snp	missense_variant	EW033_RS06000		ABC transporter ATP-binding protein	I18V	0.5	2	SAUSA300_0978	ABC transporter ATP-binding protein	SAUSA300_0978	thiX-thiW-thiV
NZ_LR130515_1156040_C_T	0.0491	0.0206	-0.787	0.118	SAUSA300_0981	NZ_LR130515	1156040	C	T	snp	missense_variant	EW033_RS06030		class I SAM-dependent rRNA methyltransferase	T304I	0.5	2	SAUSA300_0981	hypothetical protein	SAUSA300_0981	SAUSA300_0981-SAUSA300_0982
NZ_LR130515_1157961_T_C	0.0491	0.0206	-0.787	0.118	ptsI	NZ_LR130515	1157961	T	C	snp	missense_variant	EW033_RS06045	ptsP	phosphoenolpyruvate--protein phosphotransferase	V214A	0.5	2	SAUSA300_0984	phosphoenolpyruvate-protein phosphotransferase	ptsI	ptsH-ptsI
NZ_LR130515_1198023_G_A	0.0491	0.0206	-0.787	0.118	rsmD	NZ_LR130515	1198023	G	A	snp	missense_variant	EW033_RS06250	rsmD	16S rRNA (guanine(966)-N(2))-methyltransferase RsmD	M62I	0.5	2	SAUSA300_1023	hypothetical protein	SAUSA300_1023	rsmD-coaD
NZ_LR130515_1219190_A_G	0.0491	0.0206	-0.787	0.118	mutS2	NZ_LR130515	1219190	A	G	snp	missense_variant	EW033_RS06365		endonuclease MutS2	Y286C	0.5	2	SAUSA300_1043	recombination and DNA strand exchange inhibitor protein	mutS2	zapA-SAUSA300_1041-polX-mutS2
NZ_LR130515_1228834_T_C	0.0491	0.0206	-0.787	0.118	SAUSA300_1051	NZ_LR130515	1228834	T	C	snp	missense_variant	EW033_RS06410		metallophosphoesterase	V121A	0.5	2	SAUSA300_1051	hypothetical protein	SAUSA300_1051	murI-SAUSA300_1050-SAUSA300_1051
NZ_LR130515_1235963_G_A	0.0491	0.0206	-0.787	0.118	hla	NZ_LR130515	1235963	G	A	snp	missense_variant	EW033_RS06475		beta-channel forming cytolysin	Q113*	0.5	2	SAUSA300_1058	alpha-hemolysin	SAUSA300_1058
NZ_LR130515_1260094_T_G	0.0491	0.0206	-0.787	0.118	divIB	NZ_LR130515	1260094	T	G	snp	missense_variant	EW033_RS06605		cell division protein FtsQ/DivIB	S372A	0.5	2	SAUSA300_1078	cell division protein	divIB	mraY-murD-divIB-ftsA-ftsZ
NZ_LR130515_1275138_G_T	0.0491	0.0206	-0.787	0.118	pyrP	NZ_LR130515	1275138	G	T	snp	missense_variant	EW033_RS06685		uracil permease	V182F	0.5	2	SAUSA300_1092	uracil permease	pyrP	pyrP-pyrB-pyrC-carA-carB-pyrF-pyrE-SAUSA300_1099
NZ_LR130515_1276946_G_A	0.0491	0.0206	-0.787	0.118	pyrC	NZ_LR130515	1276946	G	A	snp	missense_variant	EW033_RS06695		dihydroorotase	V40I	0.5	2	SAUSA300_1094	dihydroorotase	pyrC	pyrP-pyrB-pyrC-carA-carB-pyrF-pyrE-SAUSA300_1099
NZ_LR130515_1278802_C_T	0.0491	0.0206	-0.787	0.118	carA	NZ_LR130515	1278802	C	T	snp	missense_variant	EW033_RS06700		glutamine-hydrolyzing carbamoyl-phosphate synthase small subunit	P233L	0.5	2	SAUSA300_1095	carbamoyl phosphate synthase small subunit	carA	pyrP-pyrB-pyrC-carA-carB-pyrF-pyrE-SAUSA300_1099
NZ_LR130515_1279411_G_A	0.0491	0.0206	-0.787	0.118	carB	NZ_LR130515	1279411	G	A	snp	missense_variant	EW033_RS06705	carB	carbamoyl-phosphate synthase large subunit	D72N	0.5	2	SAUSA300_1096	carbamoyl phosphate synthase large subunit	carB	pyrP-pyrB-pyrC-carA-carB-pyrF-pyrE-SAUSA300_1099
NZ_LR130515_1282063_C_T	0.0491	0.0206	-0.787	0.118	carB	NZ_LR130515	1282063	C	T	snp	missense_variant	EW033_RS06705	carB	carbamoyl-phosphate synthase large subunit	R956C	0.5	2	SAUSA300_1096	carbamoyl phosphate synthase large subunit	carB	pyrP-pyrB-pyrC-carA-carB-pyrF-pyrE-SAUSA300_1099
NZ_LR130515_1293698_GTTA_TTTT	0.0491	0.0206	-0.787	0.118		NZ_LR130515	1293698	GTTA	TTTT	complex	missense_variant	EW033_RS00100				0.5	2
NZ_LR130515_1303812_A_G	0.0491	0.0206	-0.787	0.118		NZ_LR130515	1303812	A	G	snp	missense_variant	EW033_RS00100				0.5	2
NZ_LR130515_1313716_C_A	0.0491	0.0206	-0.787	0.118	smc	NZ_LR130515	1313716	C	A	snp	missense_variant	EW033_RS06865	smc	chromosome segregation protein SMC	H233N	0.5	2	SAUSA300_1127	chromosome segregation protein SMC	smc	smc-ftsY-SAUSA300_1129-ffh
NZ_LR130515_1316907_G_T	0.0491	0.0206	-0.787	0.118	ftsY	NZ_LR130515	1316907	G	T	snp	missense_variant	EW033_RS06870	ftsY	signal recognition particle-docking protein FtsY	A108S	0.5	2	SAUSA300_1128	signal recognition particle-docking protein FtsY	ftsY	smc-ftsY-SAUSA300_1129-ffh
NZ_LR130515_1329454_A_G	0.0491	0.0206	-0.787	0.118		NZ_LR130515	1329454	A	G	snp	missense_variant	EW033_RS00100				0.5	2
NZ_LR130515_1335354_G_T	0.0491	0.0206	-0.787	0.118	gid	NZ_LR130515	1335354	G	T	snp	missense_variant	EW033_RS06950		methylenetetrahydrofolate--tRNA-(uracil(54)- C(5))-methyltransferase (FADH(2)-oxidizing) TrmFO	A22S	0.5	2	SAUSA300_1144	tRNA (uracil-5-)-methyltransferase Gid	gid
NZ_LR130515_1347118_AT_CA	0.0491	0.0206	-0.787	0.118	rasP	NZ_LR130515	1347118	AT	CA	complex	missense_variant	EW033_RS07015	rseP	RIP metalloprotease RseP	L218I	0.5	2	SAUSA300_1155	putative membrane-associated zinc metalloprotease	SAUSA300_1155	rasP-proS
NZ_LR130515_1350341_G_T	0.0491	0.0206	-0.787	0.118	polC	NZ_LR130515	1350341	G	T	snp	missense_variant	EW033_RS07025		PolC-type DNA polymerase III	A201S	0.5	2	SAUSA300_1157	DNA polymerase III PolC	polC
NZ_LR130515_1361042_G_A	0.0491	0.0206	-0.787	0.118	ribC	NZ_LR130515	1361042	G	A	snp	missense_variant	EW033_RS07070	ribF	riboflavin biosynthesis protein RibF	S154N	0.5	2	SAUSA300_1165	riboflavin biosynthesis protein ribF	ribF	truB-ribC
NZ_LR130515_1376194_A_G	0.0491	0.0206	-0.787	0.118	cinA	NZ_LR130515	1376194	A	G	snp	missense_variant	EW033_RS07135		CinA family nicotinamide mononucleotide deamidase-related protein	K358E	0.5	2	SAUSA300_1177	competence/damage-inducible protein cinA	cinA
NZ_LR130515_1404086_G_T	0.0491	0.0206	-0.787	0.118	glnA	NZ_LR130515	1404086	G	T	snp	missense_variant	EW033_RS07255	glnA	type I glutamate--ammonia ligase	A355S	0.5	2	SAUSA300_1201	glutamine synthetase, type I	glnA	glnR-glnA
NZ_LR130515_1422553_T_C	0.0491	0.0206	-0.787	0.118	thrC	NZ_LR130515	1422553	T	C	snp	missense_variant	EW033_RS07375		threonine synthase	F159L	0.5	2	SAUSA300_1227	threonine synthase	thrC	hom-thrC-thrB-SAUSA300_1229
NZ_LR130515_1443321_T_A	0.0491	0.0206	-0.787	0.118	opuD1	NZ_LR130515	1443321	T	A	snp	missense_variant	EW033_RS07485		BCCT family transporter	S442R	0.5	2	SAUSA300_1245	glycine betaine transporter opuD	opuD
NZ_LR130515_1446244_A_T	0.0491	0.0206	-0.787	0.118	citB	NZ_LR130515	1446244	A	T	snp	missense_variant	EW033_RS07495	acnA	aconitate hydratase AcnA	T571S	0.5	2	SAUSA300_1246	aconitate hydratase	acnA
NZ_LR130515_1448185_C_T	0.0491	0.0206	-0.787	0.118	SAUSA300_1248	NZ_LR130515	1448185	C	T	snp	missense_variant	EW033_RS07510		hypothetical protein	V69I	0.5	2	SAUSA300_1248	hypothetical protein	SAUSA300_1248
NZ_LR130515_1464805_G_A	0.0491	0.0206	-0.787	0.118	SAUSA300_1259	NZ_LR130515	1464805	G	A	snp	missense_variant	EW033_RS07580		Y-family DNA polymerase	G392S	0.5	2	SAUSA300_1259	ImpB/MucB/SamB family protein	SAUSA300_1259
NZ_LR130515_1478852_C_T	0.0491	0.0206	-0.787	0.118	SAUSA300_1272	NZ_LR130515	1478852	C	T	snp	missense_variant	EW033_RS07645		SWIM zinc finger family protein	A37T	0.5	2	SAUSA300_1272	hypothetical protein	SAUSA300_1272
NZ_LR130515_1490766_C_A	0.0491	0.0206	-0.787	0.118	cvfB	NZ_LR130515	1490766	C	A	snp	missense_variant	EW033_RS07715	cvfB	RNA-binding virulence regulatory protein CvfB	Q276H	0.5	2	SAUSA300_1284	hypothetical protein	SAUSA300_1284
NZ_LR130515_1497496_GTGCC_ATGCA	0.0491	0.0206	-0.787	0.118	dapB	NZ_LR130515	1497496	GTGCC	ATGCA	complex	missense_variant	EW033_RS07740		4-hydroxy-tetrahydrodipicolinate reductase	G51D	0.25	4	SAUSA300_1289	dihydrodipicolinate reductase	dapB	lysC-asd-dapA-dapB-dapD
NZ_LR130515_1498302_A_G	0.0491	0.0206	-0.787	0.118	dapD	NZ_LR130515	1498302	A	G	snp	missense_variant	EW033_RS07745	dapD	2,3,4,5-tetrahydropyridine-2,6-dicarboxylate N-acetyltransferase	E70G	0.5	2	SAUSA300_1290	tetrahydrodipicolinate acetyltransferase	dapD	lysC-asd-dapA-dapB-dapD
NZ_LR130515_1499253_G_A	0.0491	0.0206	-0.787	0.118	dapI	NZ_LR130515	1499253	G	A	snp	missense_variant	EW033_RS07750		amidohydrolase	A100T	0.5	2	SAUSA300_1291	hippurate hydrolase	SAUSA300_1291	dapI-alr2-lysA
NZ_LR130515_1536464_CG_TC	0.0491	0.0206	-0.787	0.118	ebh	NZ_LR130515	1536464	CG	TC	mnp	missense_variant	EW033_RS07955	ebh	hyperosmolarity resistance protein Ebh	A9670G	0.5	2	SAUSA300_1327	cell surface protein	SAUSA300_1327
NZ_LR130515_1559253_G_A	0.0491	0.0206	-0.787	0.118	ebh	NZ_LR130515	1559253	G	A	snp	missense_variant	EW033_RS07955	ebh	hyperosmolarity resistance protein Ebh	A2074V	0.5	2	SAUSA300_1327	cell surface protein	SAUSA300_1327
NZ_LR130515_1569896_T_C	0.0491	0.0206	-0.787	0.118		NZ_LR130515	1569896	T	C	snp	missense_variant	EW033_RS00100				0.0909091	11
NZ_LR130515_1575157_C_T	0.0491	0.0206	-0.787	0.118	dynA	NZ_LR130515	1575157	C	T	snp	missense_variant	EW033_RS07985		hypothetical protein	R226H	0.5	2	SAUSA300_1333	hypothetical protein	SAUSA300_1333	SAUSA300_1332-dynA
NZ_LR130515_1605217_GTC_ATA	0.0491	0.0206	-0.787	0.118	ubiE	NZ_LR130515	1605217	GTC	ATA	complex	missense_variant	EW033_RS08140		demethylmenaquinone methyltransferase	T51M	0.333333	3	SAUSA300_1360	ubiquinone/menaquinone biosynthesis methyltransferase	ubiE	hepT-ubiE
NZ_LR130515_1655367_T_C	0.0491	0.0206	-0.787	0.118	recN	NZ_LR130515	1655367	T	C	snp	missense_variant	EW033_RS08415	recN	DNA repair protein RecN	E175G	0.5	2	SAUSA300_1468	DNA repair protein RecN	recN	recN-argR
NZ_LR130515_1659420_A_T	0.0491	0.0206	-0.787	0.118	nusB	NZ_LR130515	1659420	A	T	snp	missense_variant	EW033_RS08440	nusB	transcription antitermination factor NusB	Y66N	0.5	2	SAUSA300_1473	transcription antitermination protein NusB	nusB	ispA-xseB-xseA-nusB-SAUSA300_1474-accC-accB
NZ_LR130515_1661724_C_A	0.0491	0.0206	-0.787	0.118	accB	NZ_LR130515	1661724	C	A	snp	missense_variant	EW033_RS08455	accB	acetyl-CoA carboxylase biotin carboxyl carrier protein	V50F	0.5	2	SAUSA300_1476	acetyl-CoA carboxylase, biotin carboxyl carrier protein	accB	ispA-xseB-xseA-nusB-SAUSA300_1474-accC-accB
NZ_LR130515_1662001_T_C	0.0491	0.0206	-0.787	0.118		NZ_LR130515	1662001	T	C	snp	missense_variant	EW033_RS00100				0.5	2
NZ_LR130515_1671872_AC_GT	0.0491	0.0206	-0.787	0.118	comGF	NZ_LR130515	1671872	AC	GT	complex	missense_variant	EW033_RS08515		competence protein ComGF	S58N	0.2	5	SAUSA300_1500	hypothetical protein	SAUSA300_1500
NZ_LR130515_1678348_G_T	0.0491	0.0206	-0.787	0.118	SAUSA300_1509	NZ_LR130515	1678348	G	T	snp	missense_variant	EW033_RS08565		rhomboid family intramembrane serine protease	P100T	0.5	2	SAUSA300_1509	rhomboid family peptidase	SAUSA300_1509	comGD-comGC-comGB-comGA-SAUSA300_1505-SAUSA300_1506-glk-SAUSA300_1508-SAUSA300_1509-SAUSA300_1510
NZ_LR130515_1725020_C_T	0.0491	0.0206	-0.787	0.118	SAUSA300_1556	NZ_LR130515	1725020	C	T	snp	missense_variant	EW033_RS08815	yqeH	ribosome biogenesis GTPase YqeH	G130S	0.5	2	SAUSA300_1556	GTP-binding protein YqeH	SAUSA300_1556	comEA-SAUSA300_1550-rsfS-SAUSA300_1552-nadD-SAUSA300_1554-aroE-SAUSA300_1556-SAUSA300_1557-mtnN
NZ_LR130515_1740998_G_A	0.0491	0.0206	-0.787	0.118	SAUSA300_1571	NZ_LR130515	1740998	G	A	snp	missense_variant	EW033_RS08910		O-methyltransferase	A96V	0.5	2	SAUSA300_1571	O-methyltransferase family protein	SAUSA300_1571	greA-udk-SAUSA300_1569-SAUSA300_1570-SAUSA300_1571
NZ_LR130515_1816385_T_C	0.0491	0.0206	-0.787	0.118	coaE	NZ_LR130515	1816385	T	C	snp	missense_variant	EW033_RS09315		dephospho-CoA kinase	E206G	0.5	2	SAUSA300_1634	dephospho-CoA kinase	coaE	coaE-mutM-polA
NZ_LR130515_1830841_AC_CT	0.0491	0.0206	-0.787	0.118	aapA	NZ_LR130515	1830841	AC	CT	complex	missense_variant	EW033_RS09360		amino acid permease	N385T	0.5	2	SAUSA300_1642	D-serine/D-alanine/glycine transporter	SAUSA300_1642
NZ_LR130515_1852346_G_A	0.0491	0.0206	-0.787	0.118	SAUSA300_1658	NZ_LR130515	1852346	G	A	snp	missense_variant	EW033_RS09450		class I SAM-dependent methyltransferase	P280S	0.5	2	SAUSA300_1658	hypothetical protein	SAUSA300_1658	ackA-SAUSA300_1658
NZ_LR130515_1874680_G_A	0.0491	0.0206	-0.787	0.118	isdH	NZ_LR130515	1874680	G	A	snp	missense_variant	EW033_RS09565	harA	haptoglobin-binding heme uptake protein HarA	Q279*	0.5	2	SAUSA300_1677	cell wall surface anchor family protein	SAUSA300_1677
NZ_LR130515_1905558_T_A	0.0491	0.0206	-0.787	0.118	SAUSA300_1701	NZ_LR130515	1905558	T	A	snp	missense_variant	EW033_RS09705		NAD(P)/FAD-dependent oxidoreductase	F77I	0.5	2	SAUSA300_1701	hypothetical protein	SAUSA300_1701
NZ_LR130515_1906966_A_G	0.0491	0.0206	-0.787	0.118	sasC	NZ_LR130515	1906966	A	G	snp	missense_variant	EW033_RS09710	sasC	LPXTG-anchored repetitive surface protein SasC	F2104L	0.5	2	SAUSA300_1702	cell wall surface anchor family protein	SAUSA300_1702
NZ_LR130515_1906973_GTGTTG_ATCTTT	0.0491	0.0206	-0.787	0.118	sasC	NZ_LR130515	1906973	GTGTTG	ATCTTT	complex	missense_variant	EW033_RS09710	sasC	LPXTG-anchored repetitive surface protein SasC	QH2100KD	0.333333	3	SAUSA300_1702	cell wall surface anchor family protein	SAUSA300_1702
NZ_LR130515_1921738_A_T	0.0491	0.0206	-0.787	0.118	SAUSA300_1710	NZ_LR130515	1921738	A	T	snp	missense_variant	EW033_RS09750		alpha/beta hydrolase	D211E	0.5	2	SAUSA300_1710	putative lysophospholipase	SAUSA300_1710
NZ_LR130515_1924148_G_A	0.0491	0.0206	-0.787	0.118	ribH	NZ_LR130515	1924148	G	A	snp	missense_variant	EW033_RS09770		6,7-dimethyl-8-ribityllumazine synthase	A15V	0.5	2	SAUSA300_1712	6,7-dimethyl-8-ribityllumazine synthase	ribH	ribH-ribA-ribB-ribD
NZ_LR130515_1929617_G_A	0.0491	0.0206	-0.787	0.118	arsR	NZ_LR130515	1929617	G	A	snp	missense_variant	EW033_RS09795		winged helix-turn-helix transcriptional regulator	V12I	0.5	2	SAUSA300_1717	arsenical resistance operon repressor	arsR	arsR-arsB-arsC
NZ_LR130515_1993916_T_C	0.0491	0.0206	-0.787	0.118	hemH	NZ_LR130515	1993916	T	C	snp	missense_variant	EW033_RS10215	hemH	ferrochelatase	M10V	0.5	2	SAUSA300_1782	ferrochelatase	hemH	hemY-hemH-hemE
NZ_LR130515_1996255_CATTAA_TATAAG	0.0491	0.0206	-0.787	0.118	SAUSA300_1785	NZ_LR130515	1996255	CATTAA	TATAAG	complex	missense_variant	EW033_RS10235		ABC transporter permease	M299I	0.5	2	SAUSA300_1785	putative ABC transporter protein EcsB	SAUSA300_1785	SAUSA300_1785-ecsA
NZ_LR130515_2008837_TG_CA	0.0491	0.0206	-0.787	0.118	SAUSA300_1796	NZ_LR130515	2008837	TG	CA	complex	missense_variant	EW033_RS10300		DUF445 domain-containing protein	I20V	0.5	2	SAUSA300_1796	hypothetical protein	SAUSA300_1796	SAUSA300_1795-SAUSA300_1796
NZ_LR130515_2035965_A_G	0.0491	0.0206	-0.787	0.118		NZ_LR130515	2035965	A	G	snp	missense_variant	EW033_RS00100				0.5	2
NZ_LR130515_2158179_G_T	0.0491	0.0206	-0.787	0.118	hlb-2	NZ_LR130515	2158179	G	T	snp	missense_variant	EW033_RS11370	sph	sphingomyelin phosphodiesterase	D14Y	0.5	2	SAUSA300_1973	truncated beta-hemolysin	SAUSA300_1973	int3-hlb-2
NZ_LR130515_2328034_G_A	0.0491	0.0206	-0.787	0.118	leuA	NZ_LR130515	2328034	G	A	snp	missense_variant	EW033_RS12335		2-isopropylmalate synthase	V250I	0.5	2	SAUSA300_2010	2-isopropylmalate synthase	leuA	ilvC-leuA-leuB-leuC-leuD-ilvA2
NZ_LR130515_2330668_G_A	0.0491	0.0206	-0.787	0.118	leuC	NZ_LR130515	2330668	G	A	snp	missense_variant	EW033_RS12345	leuC	3-isopropylmalate dehydratase large subunit	D264N	0.5	2	SAUSA300_2012	isopropylmalate isomerase large subunit	leuC	ilvC-leuA-leuB-leuC-leuD-ilvA2
NZ_LR130515_2362648_G_A	0.0491	0.0206	-0.787	0.118	ddl	NZ_LR130515	2362648	G	A	snp	missense_variant	EW033_RS12500		D-alanine--D-alanine ligase	A194V	0.5	2	SAUSA300_2039	D-alanyl-alanine synthetase A	ddl	murF-ddl
NZ_LR130515_2410533_C_T	0.0491	0.0206	-0.787	0.118	pdp	NZ_LR130515	2410533	C	T	snp	missense_variant	EW033_RS12785		pyrimidine-nucleoside phosphorylase	E320K	0.5	2	SAUSA300_2089	pyrimidine-nucleoside phosphorylase	pdp
NZ_LR130515_2533611_G_A	0.0491	0.0206	-0.787	0.118	SAUSA300_2209	NZ_LR130515	2533611	G	A	snp	missense_variant	EW033_RS13455		GNAT family N-acetyltransferase	E17K	0.5	2	SAUSA300_2209	hypothetical protein	SAUSA300_2209
NZ_LR130515_2538794_GAC_AAT	0.0491	0.0206	-0.787	0.118	SAUSA300_2213	NZ_LR130515	2538794	GAC	AAT	complex	missense_variant	EW033_RS13485		efflux RND transporter permease subunit	V747I	0.333333	3	SAUSA300_2213	AcrB/AcrD/AcrF family protein	SAUSA300_2213	SAUSA300_2213-femX
NZ_LR130515_2554066_A_G	0.0491	0.0206	-0.787	0.118	modB	NZ_LR130515	2554066	A	G	snp	missense_variant	EW033_RS13590	modB	molybdate ABC transporter permease subunit	F111L	0.5	2	SAUSA300_2229	molybdenum ABC transporter permease ModB	modB	modC-modB-modA
NZ_LR130515_2555962_A_C	0.0491	0.0206	-0.787	0.118	fdhD	NZ_LR130515	2555962	A	C	snp	missense_variant	EW033_RS13600		formate dehydrogenase accessory sulfurtransferase FdhD	I161L	0.5	2	SAUSA300_2231	formate dehydrogenase accessory protein	fdhD
NZ_LR130515_2566204_G_A	0.0491	0.0206	-0.787	0.118	ureF	NZ_LR130515	2566204	G	A	snp	missense_variant	EW033_RS13655		urease accessory protein UreF	S115N	0.5	2	SAUSA300_2242	urease accessory protein UreF	ureF	ureA-ureB-ureC-ureE-ureF-ureG-ureD
NZ_LR130515_2574715_G_A	0.0491	0.0206	-0.787	0.118	nhaC	NZ_LR130515	2574715	G	A	snp	missense_variant	EW033_RS13705	nhaC	Na+/H+ antiporter NhaC	A208V	0.5	2	SAUSA300_2250	Na+/H+ antiporter NhaC	nhaC	nhaC-SAUSA300_2251
NZ_LR130515_2591152_G_A	0.0491	0.0206	-0.787	0.118		NZ_LR130515	2591152	G	A	snp	missense_variant	EW033_RS13785-EW033_RS13790				0.5	2
NZ_LR130515_2596059_G_A	0.0491	0.0206	-0.787	0.118	SAUSA300_2268	NZ_LR130515	2596059	G	A	snp	missense_variant	EW033_RS13820		bile acid:sodium symporter family protein	Q179*	0.5	2	SAUSA300_2268	sodium/bile acid symporter family protein	SAUSA300_2268
NZ_LR130515_2604687_G_A	0.0491	0.0206	-0.787	0.118	SAUSA300_2276	NZ_LR130515	2604687	G	A	snp	missense_variant	EW033_RS13860		amidohydrolase	Q303*	0.5	2	SAUSA300_2276	M20/M25/M40 family peptidase	SAUSA300_2276
NZ_LR130515_2606235_A_G	0.0491	0.0206	-0.787	0.118	hutI	NZ_LR130515	2606235	A	G	snp	missense_variant	EW033_RS13865		imidazolonepropionase	F292L	0.5	2	SAUSA300_2277	imidazolonepropionase	hutI	hutI-hutU
NZ_LR130515_2617900_C_A	0.0491	0.0206	-0.787	0.118	SAUSA300_2288	NZ_LR130515	2617900	C	A	snp	missense_variant	EW033_RS13925		ABC transporter ATP-binding protein	A263S	0.5	2	SAUSA300_2288	ABC transporter ATP-binding protein	SAUSA300_2288	SAUSA300_2287-SAUSA300_2288
NZ_LR130515_2639631_G_A	0.0491	0.0206	-0.787	0.118	hssS	NZ_LR130515	2639631	G	A	snp	missense_variant	EW033_RS14045	hssS	heme sensor histidine kinase HssS	M171I	0.5	2	SAUSA300_2309	sensor histidine kinase	SAUSA300_2309	hssR-hssS
NZ_LR130515_2649024_G_A	0.0491	0.0206	-0.787	0.118	SAUSA300_2317	NZ_LR130515	2649024	G	A	snp	missense_variant	EW033_RS14085		oxidoreductase	D54N	0.5	2	SAUSA300_2317	putative zinc-binding dehydrogenase	SAUSA300_2317
NZ_LR130515_2662019_G_A	0.0491	0.0206	-0.787	0.118	SAUSA300_2328	NZ_LR130515	2662019	G	A	snp	missense_variant	EW033_RS14150		DUF4889 domain-containing protein	V90I	0.5	2	SAUSA300_2328	hypothetical protein	SAUSA300_2328
NZ_LR130515_2666830_TT_CC	0.0491	0.0206	-0.787	0.118	narK	NZ_LR130515	2666830	TT	CC	complex	missense_variant	EW033_RS14175		NarK/NasA family nitrate transporter	S91G	0.5	2	SAUSA300_2333	nitrite extrusion protein	narK
NZ_LR130515_2668648_C_T	0.0491	0.0206	-0.787	0.118	SAUSA300_2336	NZ_LR130515	2668648	C	T	snp	missense_variant	EW033_RS14190		MerR family transcriptional regulator	Q96*	0.5	2	SAUSA300_2336	MerR family transcriptional regulator	SAUSA300_2336	SAUSA300_2334-SAUSA300_2335-SAUSA300_2336
NZ_LR130515_2673881_G_T	0.0491	0.0206	-0.787	0.118	narH	NZ_LR130515	2673881	G	T	snp	missense_variant	EW033_RS14220	narH	nitrate reductase subunit beta	Q162K	0.5	2	SAUSA300_2342	respiratory nitrate reductase, beta subunit	narH	nreC-nreB-nreA-narI-narJ-narH-narG
NZ_LR130515_2724455_C_T	0.0491	0.0206	-0.787	0.118	kimA	NZ_LR130515	2724455	C	T	snp	missense_variant	EW033_RS14495		APC family permease	G294D	0.5	2	SAUSA300_2385	hypothetical protein	SAUSA300_2385
NZ_LR130515_2725562_C_T	0.0491	0.0206	-0.787	0.118		NZ_LR130515	2725562	C	T	snp	missense_variant	EW033_RS14495-EW033_RS14505				0.5	2
NZ_LR130515_2730415_T_C	0.0491	0.0206	-0.787	0.118	SAUSA300_2389	NZ_LR130515	2730415	T	C	snp	missense_variant	EW033_RS14525		MFS transporter	M159V	0.5	2	SAUSA300_2389	putative drug transporter	SAUSA300_2389
NZ_LR130515_2782554_C_T	0.0491	0.0206	-0.787	0.118	gtaB	NZ_LR130515	2782554	C	T	snp	missense_variant	EW033_RS14795	galU	UTP--glucose-1-phosphate uridylyltransferase GalU	V42I	0.5	2	SAUSA300_2439	UTP-glucose-1-phosphate uridylyltransferase	galU
NZ_LR130515_2786488_A_C	0.0491	0.0206	-0.787	0.118	fnbA	NZ_LR130515	2786488	A	C	snp	missense_variant	EW033_RS14805	fnbA	fibronectin-binding protein FnbA	S963A	0.333333	3	SAUSA300_2441	fibronectin binding protein A	fnbA
NZ_LR130515_2796032_TATA_AATG	0.0491	0.0206	-0.787	0.118		NZ_LR130515	2796032	TATA	AATG	complex	missense_variant	EW033_RS14845-EW033_RS14850				0.5	2
NZ_LR130515_2800003_C_A	0.0491	0.0206	-0.787	0.118		NZ_LR130515	2800003	C	A	snp	missense_variant	EW033_RS14855-EW033_RS14860				0.5	2
NZ_LR130515_2834343_C_T	0.0491	0.0206	-0.787	0.118	SAUSA300_2482	NZ_LR130515	2834343	C	T	snp	missense_variant	EW033_RS15055		CHAP domain-containing protein	T23I	0.5	2	SAUSA300_2482	hypothetical protein	SAUSA300_2482
NZ_LR130515_2847426_A_G	0.0491	0.0206	-0.787	0.118		NZ_LR130515	2847426	A	G	snp	missense_variant	EW033_RS15110-EW033_RS15115				0.5	2
NZ_LR130515_2850080_C_T	0.0491	0.0206	-0.787	0.118		NZ_LR130515	2850080	C	T	snp	missense_variant	EW033_RS15125-EW033_RS15130				0.2	5
NZ_LR130515_2921353_C_T	0.0491	0.0206	-0.787	0.118	SAUSA300_2542	NZ_LR130515	2921353	C	T	snp	missense_variant	EW033_RS15505		AMP-binding protein	G347D	0.5	2	SAUSA300_2542	putative AMP-binding enzyme	SAUSA300_2542
NZ_LR130515_2938773_G_T	0.0491	0.0206	-0.787	0.118		NZ_LR130515	2938773	G	T	snp	missense_variant	EW033_RS15600-EW033_RS15605				0.5	2
NZ_LR130515_548374_GT_CA	0.54	0.0208	0.658	0.117		NZ_LR130515	548374	GT	CA	mnp	missense_variant	EW033_RS00100				0.2	5
NZ_LR130515_2175363_A_G	0.592	0.021	0.408	0.117		NZ_LR130515	2175363	A	G	snp	missense_variant	EW033_RS00100				0.333333	3
NZ_LR130515_2622951_C_T	0.0103	0.0214	1.08	0.117	fni	NZ_LR130515	2622951	C	T	snp	missense_variant	EW033_RS13950		type 2 isopentenyl-diphosphate Delta-isomerase	G88D	0.5	2	SAUSA300_2292	isopentenyl pyrophosphate isomerase	fni	fni-corA
NZ_LR130515_2719579_C_CA	0.0284	0.0214	0.618	0.117		NZ_LR130515	2719579	C	CA	ins	missense_variant	EW033_RS14475-EW033_RS14480				0.166667	6
NZ_LR130515_1954032_TGA_AGC	0.225	0.0215	-0.534	0.117	SAUSA300_1742	NZ_LR130515	1954032	TGA	AGC	complex	missense_variant	EW033_RS09930		hypothetical protein	HD150QA	0.125	8	SAUSA300_1742	hypothetical protein	SAUSA300_1742	SAUSA300_1741-SAUSA300_1742-SAUSA300_1743
NZ_LR130515_2995023_AT_TA	0.0362	0.0215	-0.991	0.117		NZ_LR130515	2995023	AT	TA	mnp	missense_variant	EW033_RS15820-EW033_RS15825				0.25	4
NZ_LR130515_3009928_G_A	0.0362	0.0215	-0.991	0.117	SAUSA300_2610	NZ_LR130515	3009928	G	A	snp	missense_variant	EW033_RS15900		histidinol-phosphate aminotransferase family protein	P51S	0.333333	3	SAUSA300_2610	histidinol-phosphate aminotransferase hisC	hisC	hisI-hisF-hisA-hisH-hisB-SAUSA300_2610-hisD-hisG-hisZ
NZ_LR130515_3048173_ACTCTA_TCCCTG	0.0362	0.0215	-0.991	0.117		NZ_LR130515	3048173	ACTCTA	TCCCTG	complex	missense_variant	EW033_RS16085-EW033_RS16090				0.333333	3
NZ_LR130515_3048183_A_T	0.0362	0.0215	-0.991	0.117		NZ_LR130515	3048183	A	T	snp	missense_variant	EW033_RS16085-EW033_RS16090				0.0909091	11
NZ_LR130515_2619817_TCTA_CCTC	0.0103	0.0217	1.08	0.117		NZ_LR130515	2619817	TCTA	CCTC	complex	missense_variant	EW033_RS13930-EW033_RS13935				0.5	2
NZ_LR130515_2456721_A_C	0.266	0.0218	0.682	0.117		NZ_LR130515	2456721	A	C	snp	missense_variant	EW033_RS12995-EW033_RS13000				0.125	8
NZ_LR130515_1214361_ATG_TTT	0.0749	0.0219	0.806	0.117		NZ_LR130515	1214361	ATG	TTT	complex	missense_variant	EW033_RS00100				0.25	4
NZ_LR130515_271242_G_A	0.147	0.022	0.562	0.116	EW033_RS01260	NZ_LR130515	271242	G	A	snp	missense_variant	EW033_RS01260	coa	staphylocoagulase	D405N	0.1	10
NZ_LR130515_1820572_G_T	0.132	0.0221	0.426	0.116		NZ_LR130515	1820572	G	T	snp	missense_variant	EW033_RS00100				0.25	4
NZ_LR130515_1348348_C_T	0.0103	0.0222	1.14	0.116	proS	NZ_LR130515	1348348	C	T	snp	missense_variant	EW033_RS07020		proline--tRNA ligase	A192V	0.5	2	SAUSA300_1156	prolyl-tRNA synthetase	proS	rasP-proS
NZ_LR130515_152510_T_TA	0.382	0.0223	0.6	0.116		NZ_LR130515	152510	T	TA	ins	missense_variant	EW033_RS00100				0.1	10
NZ_LR130515_170379_A_C	0.46	0.0223	0.727	0.116		NZ_LR130515	170379	A	C	snp	missense_variant	EW033_RS00100				0.25	4
NZ_LR130515_283763_C_T	0.0517	0.0223	-0.723	0.116	opp-5A	NZ_LR130515	283763	C	T	snp	missense_variant	EW033_RS01305		ABC transporter substrate-binding protein	G353D	0.333333	3	SAUSA300_0231	ABC transporter substrate-binding protein	SAUSA300_0231
NZ_LR130515_3005334_C_G	0.0207	0.0223	-0.926	0.116		NZ_LR130515	3005334	C	G	snp	missense_variant	EW033_RS15870-EW033_RS15875				0.2	5
NZ_LR130515_1386595_T_A	0.0801	0.0226	-0.637	0.116		NZ_LR130515	1386595	T	A	snp	missense_variant	EW033_RS00100				0.1	10
NZ_LR130515_1615948_A_G	0.791	0.0226	0.408	0.116		NZ_LR130515	1615948	A	G	snp	missense_variant	EW033_RS00100				0.5	2
NZ_LR130515_220208_T_C	0.346	0.0227	0.662	0.116	argJ	NZ_LR130515	220208	T	C	snp	missense_variant	EW033_RS01070	argJ	bifunctional glutamate N-acetyltransferase/amino-acid acetyltransferase ArgJ	N257S	0.25	4	SAUSA300_0185	bifunctional ornithine acetyltransferase/N-acetylglutamate synthase protein	argJ	argB-argJ-argC-argD
NZ_LR130515_2385419_CTACGTCCAAA_TTACATCTAAG	0.16	0.0229	1.1	0.116	mnaA	NZ_LR130515	2385419	CTACGTCCAAA	TTACATCTAAG	complex	missense_variant	EW033_RS12655		UDP-N-acetylglucosamine 2-epimerase (non-hydrolyzing)	V266I	0.5	2	SAUSA300_2065	UDP-GlcNAc 2-epimerase	SAUSA300_2065	mnaA-upp-glyA-SAUSA300_2068
NZ_LR130515_302655_T_C	0.0388	0.023	1.05	0.116		NZ_LR130515	302655	T	C	snp	missense_variant	EW033_RS00100				0.333333	3
NZ_LR130515_2035750_G_A	0.444	0.023	0.491	0.116		NZ_LR130515	2035750	G	A	snp	missense_variant	EW033_RS00100				0.0625	16
NZ_LR130515_202560_T_A	0.543	0.0232	0.796	0.115		NZ_LR130515	202560	T	A	snp	missense_variant	EW033_RS00100				0.25	4
NZ_LR130515_424681_T_G	0.393	0.0232	0.87	0.115	EW033_RS02130	NZ_LR130515	424681	T	G	snp	missense_variant	EW033_RS02130		hypothetical protein	V14G	0.2	5
NZ_LR130515_1952194_TA_AG	0.0749	0.0232	-0.718	0.115	SAUSA300_1739	NZ_LR130515	1952194	TA	AG	mnp	missense_variant	EW033_RS09920		calcium-binding protein	DK138EE	0.25	4	SAUSA300_1739	hypothetical protein	SAUSA300_1739
NZ_LR130515_2455325_ACTGCGT_TCATCAC	0.0336	0.0233	-0.739	0.115	EW033_RS12990	NZ_LR130515	2455325	ACTGCGT	TCATCAC	complex	missense_variant	EW033_RS12990		hypothetical protein	TQL39VMM	0.0769231	13
NZ_LR130515_2986682_G_A	0.121	0.0233	-0.846	0.115	sasA	NZ_LR130515	2986682	G	A	snp	missense_variant	EW033_RS15780	sasA	serine-rich repeat glycoprotein adhesin SasA	T1083M	0.2	5	SAUSA300_2589	cell wall anchor domain-containing protein	SAUSA300_2589
NZ_LR130515_1414_A_T	0.0181	0.0234	-1.1	0.115		NZ_LR130515	1414	A	T	snp	missense_variant	EW033_RS00005-EW033_RS00010				0.125	8
NZ_LR130515_119562_T_A	0.0181	0.0234	-1.1	0.115	SAUSA300_0098	NZ_LR130515	119562	T	A	snp	missense_variant	EW033_RS00640		hypothetical protein	L45I	0.5	2	SAUSA300_0098	hypothetical protein	SAUSA300_0098
NZ_LR130515_438729_TGAGTA_GGAGCG	0.0879	0.0234	-0.626	0.115		NZ_LR130515	438729	TGAGTA	GGAGCG	complex	missense_variant	EW033_RS00100				0.2	5
NZ_LR130515_2839631_C_T	0.0181	0.0234	-1.1	0.115	SAUSA300_2485	NZ_LR130515	2839631	C	T	snp	missense_variant	EW033_RS15085		methylated-DNA--[protein]-cysteine S-methyltransferase	V21I	0.5	2	SAUSA300_2485	methylated DNA-protein cysteine methyltransferase	SAUSA300_2485
NZ_LR130515_2963139_C_T	0.0181	0.0234	-1.1	0.115	manP	NZ_LR130515	2963139	C	T	snp	missense_variant	EW033_RS15715		PTS transporter subunit EIIA	H111Y	0.5	2	SAUSA300_2576	phosphotransferase system, fructose-specific IIABC component	SAUSA300_2576	SAUSA300_2575-manP-pmi
NZ_LR130515_3004228_A_G	0.0181	0.0234	-1.1	0.115	gehA	NZ_LR130515	3004228	A	G	snp	missense_variant	EW033_RS15870	lip1	YSIRK domain-containing triacylglycerol lipase Lip1	S182P	0.5	2	SAUSA300_2603	triacylglycerol lipase	lip
NZ_LR130515_3013393_C_T	0.0181	0.0234	-1.1	0.115	SAUSA300_2614	NZ_LR130515	3013393	C	T	snp	missense_variant	EW033_RS15920		polysaccharide deacetylase family protein	D275N	0.5	2	SAUSA300_2614	hypothetical protein	SAUSA300_2614
NZ_LR130515_3022134_T_A	0.0181	0.0234	-1.1	0.115		NZ_LR130515	3022134	T	A	snp	missense_variant	EW033_RS15960-EW033_RS15965				0.5	2
NZ_LR130515_3028514_T_A	0.0181	0.0234	-1.1	0.115	rarD	NZ_LR130515	3028514	T	A	snp	missense_variant	EW033_RS15985	rarD	EamA family transporter RarD	I269L	0.5	2	SAUSA300_2628	RarD protein	rarD
NZ_LR130515_3040645_T_C	0.0181	0.0234	-1.1	0.115	EW033_RS16050	NZ_LR130515	3040645	T	C	snp	missense_variant	EW033_RS16050		helix-turn-helix transcriptional regulator	T82A	0.5	2
NZ_LR130515_3014376_A_G	0.0103	0.0235	-1.23	0.115	SAUSA300_2615	NZ_LR130515	3014376	A	G	snp	missense_variant	EW033_RS15925		GNAT family N-acetyltransferase	M152T	0.333333	3	SAUSA300_2615	hypothetical protein	SAUSA300_2615
NZ_LR130515_912345_TGATG_CGTTA	0.375	0.0236	0.58	0.115		NZ_LR130515	912345	TGATG	CGTTA	complex	missense_variant	EW033_RS00100				0.125	8
NZ_LR130515_1892812_C_T	0.137	0.0237	0.426	0.115	SAUSA300_1688	NZ_LR130515	1892812	C	T	snp	missense_variant	EW033_RS09635		DUF4479 domain-containing protein	V13I	0.5	2	SAUSA300_1688	phenylalanyl-tRNA synthetase (beta subunit)	SAUSA300_1688	murC-ftsK-SAUSA300_1688-SAUSA300_1689-SAUSA300_1690-SAUSA300_1691
NZ_LR130515_2579295_G_A	0.155	0.0238	-0.753	0.115		NZ_LR130515	2579295	G	A	snp	missense_variant	EW033_RS13730-EW033_RS13735				0.166667	6
NZ_LR130515_2850163_GAAGTGTCATGACAACTAA_TATGGGTCGCAACTGCTAC	0.284	0.0238	0.645	0.115	SAUSA300_2492	NZ_LR130515	2850163	GAAGTGTCATGACAACTAA	TATGGGTCGCAACTGCTAC	complex	missense_variant	EW033_RS15130		sugar O-acetyltransferase	N199K	0.25	4	SAUSA300_2492	acetyltransferase family protein	SAUSA300_2492
NZ_LR130515_1324947_C_T	0.031	0.0243	1.16	0.114	SAUSA300_1135	NZ_LR130515	1324947	C	T	snp	missense_variant	EW033_RS06905		YfhO family protein	V15I	0.5	2	SAUSA300_1135	hypothetical protein	SAUSA300_1135
NZ_LR130515_2700779_G_A	0.031	0.0243	1.16	0.114		NZ_LR130515	2700779	G	A	snp	missense_variant	EW033_RS14370-EW033_RS14375				0.5	2
NZ_LR130515_999824_C_A	0.0801	0.0245	-0.999	0.114		NZ_LR130515	999824	C	A	snp	missense_variant	EW033_RS00100				0.2	5
NZ_LR130515_121348_G_A	0.0129	0.0247	-1.04	0.114	EW033_RS00650	NZ_LR130515	121348	G	A	snp	missense_variant	EW033_RS00650		tandem-type lipoprotein	V9M	0.5	2
NZ_LR130515_131610_TACAT_CACAA	0.0129	0.0247	-1.04	0.114		NZ_LR130515	131610	TACAT	CACAA	complex	missense_variant	EW033_RS00100				0.1	10
NZ_LR130515_2901147_A_C	0.359	0.0247	0.724	0.114		NZ_LR130515	2901147	A	C	snp	missense_variant	EW033_RS15395-EW033_RS15400				0.166667	6
NZ_LR130515_2436009_AG_TA	0.0801	0.025	1.18	0.114	fmtB	NZ_LR130515	2436009	AG	TA	complex	missense_variant	EW033_RS12905		DUF1542 domain-containing protein	A2396V	0.0909091	11	SAUSA300_2109	truncated FmtB protein	fmtB
NZ_LR130515_1019560_A_G	0.145	0.0251	0.651	0.114		NZ_LR130515	1019560	A	G	snp	missense_variant	EW033_RS00100				0.111111	9
NZ_LR130515_698638_TGCTA_CGCTT	0.0129	0.0253	-0.978	0.114		NZ_LR130515	698638	TGCTA	CGCTT	complex	missense_variant	EW033_RS00100				0.125	8
NZ_LR130515_1180438_AT_A	0.0233	0.0254	-0.667	0.114		NZ_LR130515	1180438	AT	A	del	missense_variant	EW033_RS00100				0.05	20
NZ_LR130515_119491_A_G	0.171	0.0255	-0.655	0.114	SAUSA300_0098	NZ_LR130515	119491	A	G	snp	missense_variant	EW033_RS00640		hypothetical protein	E21G	0.142857	7	SAUSA300_0098	hypothetical protein	SAUSA300_0098
NZ_LR130515_1928634_C_T	0.439	0.0256	0.652	0.113	SAUSA300_1716	NZ_LR130515	1928634	C	T	snp	missense_variant	EW033_RS09790		FAD-dependent oxidoreductase	G143E	0.166667	6	SAUSA300_1716	hypothetical protein	SAUSA300_1716
NZ_LR130515_1952030_GATAA_AATAT	0.163	0.0257	-0.681	0.113	SAUSA300_1739	NZ_LR130515	1952030	GATAA	AATAT	complex	missense_variant	EW033_RS09920		calcium-binding protein	DK84NM	0.2	5	SAUSA300_1739	hypothetical protein	SAUSA300_1739
NZ_LR130515_819244_G_A	0.158	0.0259	-0.724	0.113	SAUSA300_0671	NZ_LR130515	819244	G	A	snp	missense_variant	EW033_RS04260		amino acid ABC transporter ATP-binding/permease protein	G152S	0.166667	6	SAUSA300_0671	ABC transporter ATP-binding protein	SAUSA300_0671	SAUSA300_0670-SAUSA300_0671
NZ_LR130515_1954412_GACAG_CCAGA	0.463	0.0259	-0.511	0.113	SAUSA300_1743	NZ_LR130515	1954412	GACAG	CCAGA	complex	missense_variant	EW033_RS09935		DUF3969 family protein	DS55PD	0.2	5	SAUSA300_1743	hypothetical protein	SAUSA300_1743	SAUSA300_1741-SAUSA300_1742-SAUSA300_1743
NZ_LR130515_280027_GT_TC	0.0517	0.0261	1.04	0.113	fadX	NZ_LR130515	280027	GT	TC	mnp	missense_variant	EW033_RS01290		acyl CoA:acetate/3-ketoacid CoA transferase	D225G	0.5	2	SAUSA300_0229	putative acyl-CoA transferase FadX	SAUSA300_0229	fadD-fadE-fadX
NZ_LR130515_2863926_AC_GT	0.45	0.0261	0.722	0.113		NZ_LR130515	2863926	AC	GT	complex	missense_variant	EW033_RS15185-EW033_RS15190				0.166667	6
NZ_LR130515_14073_G_A	0.137	0.0262	-0.664	0.113		NZ_LR130515	14073	G	A	snp	missense_variant	EW033_RS00050-EW033_RS00055				0.166667	6
NZ_LR130515_127598_AAAAAA_TATATAAGG	0.0284	0.0262	-0.946	0.113		NZ_LR130515	127598	AAAAAA	TATATAAGG	complex	missense_variant	EW033_RS00100				0.333333	3
NZ_LR130515_639692_TA_T	0.0233	0.0263	-0.818	0.113	pdxT	NZ_LR130515	639692	TA	T	del	missense_variant	EW033_RS03325	pdxT	pyridoxal 5'-phosphate synthase glutaminase subunit PdxT	A186fs	0.2	5	SAUSA300_0505	glutamine amidotransferase subunit PdxT	SAUSA300_0505	pdxS-pdxT
NZ_LR130515_560437_G_T	0.0517	0.0265	-0.709	0.113		NZ_LR130515	560437	G	T	snp	missense_variant	EW033_RS00100				0.25	4
NZ_LR130515_1913316_A_T	0.264	0.0266	0.511	0.113		NZ_LR130515	1913316	A	T	snp	missense_variant	EW033_RS00100				0.0666667	15
NZ_LR130515_336127_C_T	0.367	0.0267	0.698	0.113	SAUSA300_0277	NZ_LR130515	336127	C	T	snp	missense_variant	EW033_RS01565		CHAP domain-containing protein	A62T	0.2	5	SAUSA300_0277	putative staphyloxanthin biosynthesis protein	SAUSA300_0277
NZ_LR130515_1101954_T_C	0.109	0.0272	-0.583	0.112		NZ_LR130515	1101954	T	C	snp	missense_variant	EW033_RS00100				0.0833333	12
NZ_LR130515_280842_C_G	0.0284	0.0273	1.06	0.112		NZ_LR130515	280842	C	G	snp	missense_variant	EW033_RS00100				0.333333	3
NZ_LR130515_1409349_C_T	0.0284	0.0273	1.06	0.112		NZ_LR130515	1409349	C	T	snp	missense_variant	EW033_RS00100				0.333333	3
NZ_LR130515_1409373_G_A	0.0284	0.0273	1.06	0.112		NZ_LR130515	1409373	G	A	snp	missense_variant	EW033_RS00100				0.333333	3
NZ_LR130515_1483131_A_G	0.0284	0.0273	1.06	0.112		NZ_LR130515	1483131	A	G	snp	missense_variant	EW033_RS00100				0.333333	3
NZ_LR130515_1594847_A_T	0.0517	0.0273	-0.61	0.112		NZ_LR130515	1594847	A	T	snp	missense_variant	EW033_RS00100				0.125	8
NZ_LR130515_1928802_G_A	0.0284	0.0273	1.06	0.112	SAUSA300_1716	NZ_LR130515	1928802	G	A	snp	missense_variant	EW033_RS09790		FAD-dependent oxidoreductase	A87V	0.333333	3	SAUSA300_1716	hypothetical protein	SAUSA300_1716
NZ_LR130515_1951481_C_A	0.0284	0.0273	1.06	0.112		NZ_LR130515	1951481	C	A	snp	missense_variant	EW033_RS00100				0.333333	3
NZ_LR130515_2409042_C_A	0.0284	0.0273	1.06	0.112		NZ_LR130515	2409042	C	A	snp	missense_variant	EW033_RS00100				0.2	5
NZ_LR130515_2439248_CATT_TCGC	0.0362	0.0273	0.664	0.112	fmtB	NZ_LR130515	2439248	CATT	TCGC	complex	missense_variant	EW033_RS12905		DUF1542 domain-containing protein	NV1316AI	0.0769231	13	SAUSA300_2109	truncated FmtB protein	fmtB
NZ_LR130515_2439258_CGT_TAC	0.0362	0.0273	0.664	0.112	fmtB	NZ_LR130515	2439258	CGT	TAC	complex	missense_variant	EW033_RS12905		DUF1542 domain-containing protein	T1313V	0.0526316	19	SAUSA300_2109	truncated FmtB protein	fmtB
NZ_LR130515_2546345_GAT_TAC	0.0284	0.0273	1.06	0.112	EW033_RS13520	NZ_LR130515	2546345	GAT	TAC	complex	missense_variant	EW033_RS13520		hypothetical protein	I51T	0.333333	3
NZ_LR130515_366061_TTT_ACG	0.323	0.0274	-0.344	0.112		NZ_LR130515	366061	TTT	ACG	complex	missense_variant	EW033_RS00100				0.03125	32
NZ_LR130515_679949_A_G	0.155	0.0274	-0.689	0.112	ilvE	NZ_LR130515	679949	A	G	snp	missense_variant	EW033_RS03510		branched-chain amino acid aminotransferase	N18D	0.333333	3	SAUSA300_0539	branched-chain amino acid aminotransferase	ilvE
NZ_LR130515_30534_G_A	0.491	0.0275	0.895	0.112	adsA	NZ_LR130515	30534	G	A	snp	missense_variant	EW033_RS00135		LPXTG-anchored adenosine synthase AdsA	S26N	0.333333	3	SAUSA300_0025	5'-nucleotidase family protein	SAUSA300_0025
NZ_LR130515_158844_G_C	0.491	0.0275	0.895	0.112	SAUSA300_0134	NZ_LR130515	158844	G	C	snp	missense_variant	EW033_RS00805		lipopolysaccharide biosynthesis protein	C273S	0.5	2	SAUSA300_0134	polysaccharide extrusion protein	SAUSA300_0134	SAUSA300_0132-SAUSA300_0133-SAUSA300_0134
NZ_LR130515_239728_T_C	0.491	0.0275	0.895	0.112	SAUSA300_0200	NZ_LR130515	239728	T	C	snp	missense_variant	EW033_RS01145		ABC transporter ATP-binding protein	I401V	0.333333	3	SAUSA300_0200	peptide ABC transporter ATP-binding protein	SAUSA300_0200
NZ_LR130515_321401_T_C	0.491	0.0275	0.895	0.112		NZ_LR130515	321401	T	C	snp	missense_variant	EW033_RS00100				0.333333	3
NZ_LR130515_428291_G_C	0.491	0.0275	0.895	0.112	lplA2	NZ_LR130515	428291	G	C	snp	missense_variant	EW033_RS02155		lipoate--protein ligase	R120T	0.333333	3	SAUSA300_0328	lipoate-protein ligase A family protein	SAUSA300_0328	SAUSA300_0324-gcvH-L-SAUSA300_0326-sirTM-lplA2
NZ_LR130515_2850876_A_G	0.491	0.0275	0.895	0.112		NZ_LR130515	2850876	A	G	snp	missense_variant	EW033_RS15130-EW033_RS15135				0.333333	3
NZ_LR130515_2876837_CA_TT	0.491	0.0275	0.895	0.112	SAUSA300_2519	NZ_LR130515	2876837	CA	TT	mnp	missense_variant	EW033_RS15260		GTP-binding protein	V122I	0.333333	3	SAUSA300_2519	putative cobalamin synthesis protein	SAUSA300_2519	SAUSA300_2519-SAUSA300_2520-SAUSA300_2521
NZ_LR130515_2923186_C_A	0.491	0.0275	0.895	0.112		NZ_LR130515	2923186	C	A	snp	missense_variant	EW033_RS15510-EW033_RS15515				0.5	2
NZ_LR130515_2923272_T_C	0.491	0.0275	0.895	0.112		NZ_LR130515	2923272	T	C	snp	missense_variant	EW033_RS15510-EW033_RS15515				0.333333	3
NZ_LR130515_2962611_C_A	0.491	0.0275	0.895	0.112	SAUSA300_2575	NZ_LR130515	2962611	C	A	snp	missense_variant	EW033_RS15710		BglG family transcription antiterminator	T585K	0.333333	3	SAUSA300_2575	BglG family transcriptional antiterminator	SAUSA300_2575	SAUSA300_2575-manP-pmi
NZ_LR130515_129504_G_T	0.333	0.0276	0.775	0.112		NZ_LR130515	129504	G	T	snp	missense_variant	EW033_RS00100				0.333333	3
NZ_LR130515_365961_G_GT	0.0362	0.0276	0.699	0.112		NZ_LR130515	365961	G	GT	ins	missense_variant	EW033_RS00100				0.5	2
NZ_LR130515_2046244_A_T	0.287	0.0277	0.778	0.112		NZ_LR130515	2046244	A	T	snp	missense_variant	EW033_RS00100				0.2	5
NZ_LR130515_1376234_C_T	0.093	0.0278	0.927	0.112	cinA	NZ_LR130515	1376234	C	T	snp	missense_variant	EW033_RS07135		CinA family nicotinamide mononucleotide deamidase-related protein	A371V	0.25	4	SAUSA300_1177	competence/damage-inducible protein cinA	cinA
NZ_LR130515_2821762_T_G	0.736	0.0278	0.305	0.112		NZ_LR130515	2821762	T	G	snp	missense_variant	EW033_RS14990-EW033_RS14995				0.0416667	24
NZ_LR130515_245812_T_G	0.447	0.0279	0.795	0.112	ggt	NZ_LR130515	245812	T	G	snp	missense_variant	EW033_RS01165	ggt	gamma-glutamyltransferase	S151A	0.333333	3	SAUSA300_0204	gamma-glutamyltranspeptidase	ggt	SAUSA300_0201-SAUSA300_0202-SAUSA300_0203-ggt
NZ_LR130515_1829481_AGC_GGA	0.0103	0.0279	-0.991	0.112		NZ_LR130515	1829481	AGC	GGA	complex	missense_variant	EW033_RS00100				0.5	2
NZ_LR130515_2836224_A_TAT	0.147	0.0279	0.443	0.112		NZ_LR130515	2836224	A	TAT	complex	missense_variant	EW033_RS15070-EW033_RS15075				0.0344828	29
NZ_LR130515_2543945_C_A	0.0103	0.028	0.997	0.112		NZ_LR130515	2543945	C	A	snp	missense_variant	EW033_RS13500-EW033_RS13505				0.5	2
NZ_LR130515_2736041_G_T	0.0129	0.028	-0.887	0.112		NZ_LR130515	2736041	G	T	snp	missense_variant	EW033_RS14560-EW033_RS14565				0.5	2
NZ_LR130515_1681816_CA_C	0.0853	0.0281	-0.602	0.112		NZ_LR130515	1681816	CA	C	del	missense_variant	EW033_RS00100				0.25	4
NZ_LR130515_1232306_T_G	0.0568	0.0282	-0.733	0.112	efb	NZ_LR130515	1232306	T	G	snp	missense_variant	EW033_RS06440		complement convertase inhibitor Efb	D102E	0.5	2	SAUSA300_1055	fibrinogen-binding protein	efb
NZ_LR130515_1642977_TAATTTTATTTTGAGAAGCTAT_CCAGATTAAATTGTGATGCAAC	0.222	0.0282	-0.58	0.112	malR	NZ_LR130515	1642977	TAATTTTATTTTGAGAAGCTAT	CCAGATTAAATTGTGATGCAAC	complex	missense_variant	EW033_RS08355		LacI family transcriptional regulator	IASQNKIN208VASQFNLD	0.111111	9	SAUSA300_1457	maltose operon transcriptional repressor	malR	malA-malR
NZ_LR130515_1794347_TT_AG	0.0568	0.0282	-0.733	0.112	SAUSA300_1613	NZ_LR130515	1794347	TT	AG	complex	missense_variant	EW033_RS09190		AbrB family transcriptional regulator	I99L	0.5	2	SAUSA300_1613	putative abrB protein	SAUSA300_1613
NZ_LR130515_1954397_T_A	0.0568	0.0282	-0.733	0.112	SAUSA300_1743	NZ_LR130515	1954397	T	A	snp	missense_variant	EW033_RS09935		DUF3969 family protein	S50T	0.5	2	SAUSA300_1743	hypothetical protein	SAUSA300_1743	SAUSA300_1741-SAUSA300_1742-SAUSA300_1743
NZ_LR130515_1999788_G_A	0.0439	0.0284	0.906	0.111	SAUSA300_1789	NZ_LR130515	1999788	G	A	snp	missense_variant	EW033_RS10260		DUF3267 domain-containing protein	V37I	0.333333	3	SAUSA300_1789	hypothetical protein	SAUSA300_1789
NZ_LR130515_1908491_ATTT_GTTA	0.168	0.0286	1.2	0.111	sasC	NZ_LR130515	1908491	ATTT	GTTA	complex	missense_variant	EW033_RS09710	sasC	LPXTG-anchored repetitive surface protein SasC	E1594D	0.333333	3	SAUSA300_1702	cell wall surface anchor family protein	SAUSA300_1702
NZ_LR130515_1908517_GTTGT_CTTGA	0.168	0.0286	1.2	0.111	sasC	NZ_LR130515	1908517	GTTGT	CTTGA	complex	missense_variant	EW033_RS09710	sasC	LPXTG-anchored repetitive surface protein SasC	Q1587E	0.5	2	SAUSA300_1702	cell wall surface anchor family protein	SAUSA300_1702
NZ_LR130515_2455325_ACTGCGT_TCATCGC	0.0904	0.0286	0.512	0.111	EW033_RS12990	NZ_LR130515	2455325	ACTGCGT	TCATCGC	complex	missense_variant	EW033_RS12990		hypothetical protein	TQL39AMM	0.0769231	13
NZ_LR130515_2878116_AAA_GAG	0.359	0.0287	0.605	0.111	SAUSA300_2520	NZ_LR130515	2878116	AAA	GAG	complex	missense_variant	EW033_RS15265		ferrous iron transporter B	F175L	0.125	8	SAUSA300_2520	transporter gate domain-containing protein	SAUSA300_2520	SAUSA300_2519-SAUSA300_2520-SAUSA300_2521
NZ_LR130515_882474_G_A	0.716	0.0292	0.399	0.111	pepT	NZ_LR130515	882474	G	A	snp	missense_variant	EW033_RS04580	pepT	peptidase T	P120L	0.5	2	SAUSA300_0727	peptidase T	pepT	pepT-SAUSA300_0728-SAUSA300_0729
NZ_LR130515_1952054_ACAGC_TCAGA	0.282	0.0292	-0.594	0.111	SAUSA300_1739	NZ_LR130515	1952054	ACAGC	TCAGA	complex	missense_variant	EW033_RS09920		calcium-binding protein	TA92SE	0.25	4	SAUSA300_1739	hypothetical protein	SAUSA300_1739
NZ_LR130515_1952066_G_A	0.282	0.0292	-0.594	0.111	SAUSA300_1739	NZ_LR130515	1952066	G	A	snp	missense_variant	EW033_RS09920		calcium-binding protein	E96K	0.25	4	SAUSA300_1739	hypothetical protein	SAUSA300_1739
NZ_LR130515_2010134_A_G	0.716	0.0292	0.399	0.111	airR	NZ_LR130515	2010134	A	G	snp	missense_variant	EW033_RS10310		response regulator transcription factor	L128P	0.5	2	SAUSA300_1798	DNA-binding response regulator	SAUSA300_1798	airR-airS
NZ_LR130515_115010_G_A	0.0362	0.0294	-0.888	0.111	EW033_RS00625	NZ_LR130515	115010	G	A	snp	missense_variant	EW033_RS00625		TfoX/Sxy family protein	V64I	0.5	2
NZ_LR130515_120897_G_C	0.0362	0.0294	-0.888	0.111	plc	NZ_LR130515	120897	G	C	snp	missense_variant	EW033_RS00645		phosphatidylinositol-specific phospholipase C	V261L	0.5	2	SAUSA300_0099	1-phosphatidylinositol phosphodiesterase	plc
NZ_LR130515_2957252_G_A	0.0362	0.0294	-0.888	0.111		NZ_LR130515	2957252	G	A	snp	missense_variant	EW033_RS15690-EW033_RS15695				0.5	2
NZ_LR130515_3005164_A_T	0.284	0.0294	0.504	0.111		NZ_LR130515	3005164	A	T	snp	missense_variant	EW033_RS15870-EW033_RS15875				0.0555556	18
NZ_LR130515_1126812_G_A	0.786	0.0295	0.372	0.111		NZ_LR130515	1126812	G	A	snp	missense_variant	EW033_RS00100				0.166667	6
NZ_LR130515_1498084_C_T	0.0853	0.0295	0.679	0.111		NZ_LR130515	1498084	C	T	snp	missense_variant	EW033_RS00100				0.166667	6
NZ_LR130515_2185523_T_C	0.0904	0.0299	1.14	0.11		NZ_LR130515	2185523	T	C	snp	missense_variant	EW033_RS00100				0.5	2
NZ_LR130515_1911978_AAA_TAG	0.266	0.0301	0.532	0.11	sasC	NZ_LR130515	1911978	AAA	TAG	complex	missense_variant	EW033_RS09710	sasC	LPXTG-anchored repetitive surface protein SasC	F433Y	0.05	20	SAUSA300_1702	cell wall surface anchor family protein	SAUSA300_1702
NZ_LR130515_247374_ACGC_GTAT	0.297	0.0303	-0.423	0.11		NZ_LR130515	247374	ACGC	GTAT	complex	missense_variant	EW033_RS00100				0.0454545	22
NZ_LR130515_2970946_A_G	0.031	0.0303	-0.77	0.11		NZ_LR130515	2970946	A	G	snp	missense_variant	EW033_RS15730-EW033_RS15735				0.2	5
NZ_LR130515_3005403_C_T	0.344	0.0305	0.589	0.11		NZ_LR130515	3005403	C	T	snp	missense_variant	EW033_RS15870-EW033_RS15875				0.125	8
NZ_LR130515_156824_AT_TA	0.393	0.0306	0.799	0.11	SAUSA300_0133	NZ_LR130515	156824	AT	TA	complex	missense_variant	EW033_RS00800		O-antigen ligase family protein	Y9L	0.333333	3	SAUSA300_0133	hypothetical protein	SAUSA300_0133	SAUSA300_0132-SAUSA300_0133-SAUSA300_0134
NZ_LR130515_2629060_TCGAT_ACGAC	0.0775	0.0306	1.01	0.11	emrB	NZ_LR130515	2629060	TCGAT	ACGAC	complex	missense_variant	EW033_RS13980		DHA2 family efflux MFS transporter permease subunit	T63S	0.0526316	19	SAUSA300_2298	multidrug resistance protein B, drug resistance transporter	SAUSA300_2298	emrB-SAUSA300_2299
NZ_LR130515_234655_T_C	0.576	0.0307	0.879	0.11		NZ_LR130515	234655	T	C	snp	missense_variant	EW033_RS00100				0.333333	3
NZ_LR130515_1500823_T_G	0.362	0.0308	0.619	0.11	alr2	NZ_LR130515	1500823	T	G	snp	missense_variant	EW033_RS07755		alanine racemase	L238V	0.142857	7	SAUSA300_1292	alanine racemase	alr2	dapI-alr2-lysA
NZ_LR130515_872471_ACTGAG_TCAGAC	0.111	0.0309	0.451	0.11	sstA	NZ_LR130515	872471	ACTGAG	TCAGAC	complex	missense_variant	EW033_RS04530		ABC transporter permease	TE38SD	0.0384615	26	SAUSA300_0718	iron compound ABC transporter permease	SAUSA300_0718	sstA-sstB-sstC-sstD
NZ_LR130515_1379124_A_C	0.607	0.0309	0.404	0.11	rny/cvfA	NZ_LR130515	1379124	A	C	snp	missense_variant	EW033_RS07145	rny	ribonuclease Y	Q430P	0.05	20	SAUSA300_1179	phosphodiesterase	SAUSA300_1179
NZ_LR130515_2997799_A_AT	0.031	0.0315	-0.842	0.109		NZ_LR130515	2997799	A	AT	ins	missense_variant	EW033_RS15835-EW033_RS15840				0.25	4
NZ_LR130515_1202863_A_ATTAGCTACTGGT	0.0439	0.0316	-0.706	0.109	isdB	NZ_LR130515	1202863	A	ATTAGCTACTGGT	ins	missense_variant	EW033_RS06280	isdB	heme uptake protein IsdB	K73_A76dup	0.333333	3	SAUSA300_1028	iron transport associated domain-containing protein	SAUSA300_1028
NZ_LR130515_2805396_ACAGGCA_GCAAGTG	0.0233	0.0316	0.783	0.109	fbp	NZ_LR130515	2805396	ACAGGCA	GCAAGTG	complex	missense_variant	EW033_RS14900		fructose-1,6-bisphosphatase	A182V	0.0434783	23	SAUSA300_2455	putative fructose-1,6-bisphosphatase	SAUSA300_2455
NZ_LR130515_1735941_G_A	0.119	0.0317	0.567	0.109	SAUSA300_1565	NZ_LR130515	1735941	G	A	snp	missense_variant	EW033_RS08880		biotin-dependent carboxyltransferase family protein	A108V	0.5	2	SAUSA300_1565	hypothetical protein	SAUSA300_1565	SAUSA300_1561-pxpA-SAUSA300_1563-SAUSA300_1564-SAUSA300_1565-SAUSA300_1566
NZ_LR130515_2967219_T_C	0.22	0.0318	-0.796	0.109	SAUSA300_2578	NZ_LR130515	2967219	T	C	snp	missense_variant	EW033_RS15725		YhgE/Pip domain-containing protein	T530A	0.5	2	SAUSA300_2578	putative phage infection protein	SAUSA300_2578
NZ_LR130515_3020960_C_T	0.22	0.0318	-0.796	0.109		NZ_LR130515	3020960	C	T	snp	missense_variant	EW033_RS15955-EW033_RS15960				0.333333	3
NZ_LR130515_2503697_G_A	0.0413	0.0319	-0.696	0.109	EW033_RS13220	NZ_LR130515	2503697	G	A	snp	missense_variant	EW033_RS13220		hypothetical protein	M6I	0.2	5
NZ_LR130515_545417_TA_T	0.0207	0.0321	-0.79	0.109	lpl9	NZ_LR130515	545417	TA	T	del	missense_variant	EW033_RS02815	lpl10	tandem-type lipoprotein Lpl10	I7fs	0.333333	3	SAUSA300_0419	tandem lipoprotein	SAUSA300_0419	lpl9-SAUSA300_0420-SAUSA300_0421-SAUSA300_0422
NZ_LR130515_3028304_T_G	0.496	0.0321	0.555	0.109		NZ_LR130515	3028304	T	G	snp	missense_variant	EW033_RS15980-EW033_RS15985				0.25	4
NZ_LR130515_126490_T_A	0.32	0.0322	-0.633	0.109	norC	NZ_LR130515	126490	T	A	snp	missense_variant	EW033_RS00665		MFS transporter	N245K	0.2	5	SAUSA300_0106	putative drug transporter	SAUSA300_0106	SAUSA300_0105-norC
NZ_LR130515_1737098_G_T	0.147	0.0322	-0.538	0.109		NZ_LR130515	1737098	G	T	snp	missense_variant	EW033_RS00100				0.166667	6
NZ_LR130515_280769_G_A	0.0904	0.0323	-1.26	0.109		NZ_LR130515	280769	G	A	snp	missense_variant	EW033_RS00100				0.5	2
NZ_LR130515_2986456_GGAATCG_CGAAGCA	0.0594	0.0323	-0.648	0.109	sasA	NZ_LR130515	2986456	GGAATCG	CGAAGCA	complex	missense_variant	EW033_RS15780	sasA	serine-rich repeat glycoprotein adhesin SasA	D1157A	0.25	4	SAUSA300_2589	cell wall anchor domain-containing protein	SAUSA300_2589
NZ_LR130515_2986467_TA_AT	0.0594	0.0323	-0.648	0.109	sasA	NZ_LR130515	2986467	TA	AT	mnp	missense_variant	EW033_RS15780	sasA	serine-rich repeat glycoprotein adhesin SasA	M1155L	0.166667	6	SAUSA300_2589	cell wall anchor domain-containing protein	SAUSA300_2589
NZ_LR130515_1539050_GC_AT	0.354	0.0325	0.49	0.109	ebh	NZ_LR130515	1539050	GC	AT	complex	missense_variant	EW033_RS07955	ebh	hyperosmolarity resistance protein Ebh	G8808D	0.111111	9	SAUSA300_1327	cell surface protein	SAUSA300_1327
NZ_LR130515_1952246_A_G	0.158	0.0325	-0.659	0.109	SAUSA300_1739	NZ_LR130515	1952246	A	G	snp	missense_variant	EW033_RS09920		calcium-binding protein	N156D	0.333333	3	SAUSA300_1739	hypothetical protein	SAUSA300_1739
NZ_LR130515_449393_CG_AA	0.0155	0.0331	-1.08	0.108	SAUSA300_0350	NZ_LR130515	449393	CG	AA	complex	missense_variant	EW033_RS02270		helix-turn-helix transcriptional regulator	T55K	0.333333	3	SAUSA300_0350	Cro/CI family transcriptional regulator-like protein	SAUSA300_0350	SAUSA300_0350-SAUSA300_0351-SAUSA300_0352-SAUSA300_0353
NZ_LR130515_2849_T_G	0.439	0.0335	0.455	0.108		NZ_LR130515	2849	T	G	snp	missense_variant	EW033_RS00010-EW033_RS00015				0.0588235	17
NZ_LR130515_3048183_A_C	0.266	0.0335	0.527	0.108		NZ_LR130515	3048183	A	C	snp	missense_variant	EW033_RS16085-EW033_RS16090				0.0909091	11
NZ_LR130515_2862146_A_T	0.0904	0.0338	-1.23	0.108	crtP	NZ_LR130515	2862146	A	T	snp	missense_variant	EW033_RS15175		NAD(P)/FAD-dependent oxidoreductase	L67I	0.5	2	SAUSA300_2501	phytoene dehydrogenase	SAUSA300_2501	crtN-crtM-crtQ-crtP-crtO
NZ_LR130515_2923282_G_T	0.395	0.034	0.763	0.108		NZ_LR130515	2923282	G	T	snp	missense_variant	EW033_RS15510-EW033_RS15515				0.2	5
NZ_LR130515_3005514_A_G	0.354	0.0341	0.635	0.108		NZ_LR130515	3005514	A	G	snp	missense_variant	EW033_RS15870-EW033_RS15875				0.142857	7
NZ_LR130515_301232_GTG_TTA	0.32	0.0342	0.659	0.108	tarL'	NZ_LR130515	301232	GTG	TTA	complex	missense_variant	EW033_RS01405		CDP-glycerol glycerophosphotransferase family protein	V126L	0.25	4	SAUSA300_0247	putative teichoic acid biosynthesis protein B	SAUSA300_0247	tarI'-tarJ'-tarL'
NZ_LR130515_301240_CAACGAA_GTATGAT	0.32	0.0342	0.659	0.108	tarL'	NZ_LR130515	301240	CAACGAA	GTATGAT	complex	missense_variant	EW033_RS01405		CDP-glycerol glycerophosphotransferase family protein	NE129YD	0.25	4	SAUSA300_0247	putative teichoic acid biosynthesis protein B	SAUSA300_0247	tarI'-tarJ'-tarL'
NZ_LR130515_329508_A_G	0.24	0.0344	-0.546	0.108		NZ_LR130515	329508	A	G	snp	missense_variant	EW033_RS00100				0.2	5
NZ_LR130515_947780_A_T	0.375	0.0344	0.624	0.108		NZ_LR130515	947780	A	T	snp	missense_variant	EW033_RS00100				0.125	8
NZ_LR130515_290903_T_C	0.478	0.0345	0.697	0.108	SAUSA300_0237	NZ_LR130515	290903	T	C	snp	missense_variant	EW033_RS01350		nucleoside hydrolase	V76A	0.2	5	SAUSA300_0237	inosine-uridine preferring nucleoside hydrolase	SAUSA300_0237
NZ_LR130515_932205_C_A	0.589	0.0345	0.748	0.108	SAUSA300_0770	NZ_LR130515	932205	C	A	snp	missense_variant	EW033_RS04825		hypothetical protein	H100N	0.25	4	SAUSA300_0770	hypothetical protein	SAUSA300_0770
NZ_LR130515_1178461_A_T	0.0724	0.0347	-0.845	0.107		NZ_LR130515	1178461	A	T	snp	missense_variant	EW033_RS00100				0.2	5
NZ_LR130515_119649_T_G	0.362	0.0348	0.814	0.107	SAUSA300_0098	NZ_LR130515	119649	T	G	snp	missense_variant	EW033_RS00640		hypothetical protein	S74A	0.2	5	SAUSA300_0098	hypothetical protein	SAUSA300_0098
NZ_LR130515_127156_TGCCC_CGCCA	0.362	0.0348	0.814	0.107		NZ_LR130515	127156	TGCCC	CGCCA	complex	missense_variant	EW033_RS00100				0.333333	3
NZ_LR130515_180079_TTTCAATGAG_GTTTAATAAA	0.362	0.0348	0.814	0.107	capB	NZ_LR130515	180079	TTTCAATGAG	GTTTAATAAA	complex	missense_variant	EW033_RS00900		tyrosine-protein kinase	E149K	0.5	2	SAUSA300_0153	capsular polysaccharide biosynthesis protein Cap5B	cap5B	capA-capB-capC-capD-capE-capF-capG-capH-capI-capJ-capK-capL-capM-capN-capO-capP
NZ_LR130515_180223_TAAAA_AAAAG	0.362	0.0348	0.814	0.107	capB	NZ_LR130515	180223	TAAAA	AAAAG	complex	missense_variant	EW033_RS00900		tyrosine-protein kinase	T196A	0.5	2	SAUSA300_0153	capsular polysaccharide biosynthesis protein Cap5B	cap5B	capA-capB-capC-capD-capE-capF-capG-capH-capI-capJ-capK-capL-capM-capN-capO-capP
NZ_LR130515_1267371_GA_G	0.0336	0.0348	0.661	0.107		NZ_LR130515	1267371	GA	G	del	missense_variant	EW033_RS00100				0.333333	3
NZ_LR130515_2850115_C_A	0.362	0.0348	0.814	0.107		NZ_LR130515	2850115	C	A	snp	missense_variant	EW033_RS15125-EW033_RS15130				0.5	2
NZ_LR130515_2863226_C_T	0.362	0.0348	0.814	0.107	SAUSA300_2503	NZ_LR130515	2863226	C	T	snp	missense_variant	EW033_RS15185		CHAP domain-containing protein	S183N	0.5	2	SAUSA300_2503	secretory antigen precursor SsaA	SAUSA300_2503
NZ_LR130515_2864077_C_A	0.362	0.0348	0.814	0.107		NZ_LR130515	2864077	C	A	snp	missense_variant	EW033_RS15185-EW033_RS15190				0.5	2
NZ_LR130515_2020860_ATCTC_TTCTT	0.0982	0.035	-0.796	0.107		NZ_LR130515	2020860	ATCTC	TTCTT	complex	missense_variant	EW033_RS00100				0.0625	16
NZ_LR130515_1656786_G_T	0.0258	0.0351	0.756	0.107		NZ_LR130515	1656786	G	T	snp	missense_variant	EW033_RS00100				0.5	2
NZ_LR130515_2468319_C_T	0.0258	0.0351	0.756	0.107		NZ_LR130515	2468319	C	T	snp	missense_variant	EW033_RS13050-EW033_RS13055				0.2	5
NZ_LR130515_152532_AC_GA	0.276	0.0352	0.586	0.107		NZ_LR130515	152532	AC	GA	mnp	missense_variant	EW033_RS00100				0.333333	3
NZ_LR130515_136063_C_T	0.0904	0.0353	-1.28	0.107		NZ_LR130515	136063	C	T	snp	missense_variant	EW033_RS00100				0.5	2
NZ_LR130515_428957_A_T	0.168	0.0353	-0.649	0.107		NZ_LR130515	428957	A	T	snp	missense_variant	EW033_RS00100				0.111111	9
NZ_LR130515_2872728_CCT_TCA	0.344	0.0353	0.628	0.107	SAUSA300_2514	NZ_LR130515	2872728	CCT	TCA	complex	missense_variant	EW033_RS15235		DUF2316 family protein	G31E	0.2	5	SAUSA300_2514	hypothetical protein	SAUSA300_2514	SAUSA300_2512-SAUSA300_2513-SAUSA300_2514
NZ_LR130515_1751685_AT_A	0.0155	0.0354	0.764	0.107		NZ_LR130515	1751685	AT	A	del	missense_variant	EW033_RS00100				0.333333	3
NZ_LR130515_2834013_C_CT	0.142	0.0354	0.391	0.107		NZ_LR130515	2834013	C	CT	ins	missense_variant	EW033_RS15050-EW033_RS15055				0.333333	3
NZ_LR130515_2878076_G_A	0.274	0.0354	0.606	0.107	SAUSA300_2520	NZ_LR130515	2878076	G	A	snp	missense_variant	EW033_RS15265		ferrous iron transporter B	R189W	0.2	5	SAUSA300_2520	transporter gate domain-containing protein	SAUSA300_2520	SAUSA300_2519-SAUSA300_2520-SAUSA300_2521
NZ_LR130515_126481_T_G	0.0413	0.0357	-0.778	0.107	norC	NZ_LR130515	126481	T	G	snp	missense_variant	EW033_RS00665		MFS transporter	I242M	0.333333	3	SAUSA300_0106	putative drug transporter	SAUSA300_0106	SAUSA300_0105-norC
NZ_LR130515_1293309_C_T	0.519	0.0357	0.618	0.107		NZ_LR130515	1293309	C	T	snp	missense_variant	EW033_RS00100				0.25	4
NZ_LR130515_263801_G_A	0.543	0.0359	0.578	0.107		NZ_LR130515	263801	G	A	snp	missense_variant	EW033_RS00100				0.1	10
NZ_LR130515_2975491_C_T	0.0982	0.0359	-0.966	0.107	gtfA	NZ_LR130515	2975491	C	T	snp	missense_variant	EW033_RS15750	gtfA	accessory Sec system glycosyltransferase GtfA	A455T	0.5	2	SAUSA300_2583	putative glycosyl transferase	SAUSA300_2583	gtfB-gtfA-secA2-asp3-asp2-asp1-secY2
NZ_LR130515_148915_TAC_CAA	0.328	0.036	0.691	0.107	sbnF	NZ_LR130515	148915	TAC	CAA	complex	missense_variant	EW033_RS00745	sbnF	3-(L-alanin-3-ylcarbamoyl)-2-[(2- aminoethylcarbamoyl)methyl]-2-hydroxypropanoate synthase SbnF	T608N	0.25	4	SAUSA300_0123	IucC family siderophore biosynthesis protein	SAUSA300_0123	sbnA-sbnB-sbnC-sbnD-sbnE-sbnF-sbnG-sbnH-sbnI
NZ_LR130515_1159665_C_A	0.0155	0.0362	0.904	0.107		NZ_LR130515	1159665	C	A	snp	missense_variant	EW033_RS00100				0.5	2
NZ_LR130515_2497476_CACAGATACCAAAAAGAACATC_AACGAATAGCACTCAAAACAATATA	0.0465	0.0362	0.665	0.107	hysA	NZ_LR130515	2497476	CACAGATACCAAAAAGAACATC	AACGAATAGCACTCAAAACAATATA	complex	missense_variant	EW033_RS13190	hysA	hyaluronate lyase HysA	D629_K632delinsNSTQN	0.0714286	14	SAUSA300_2161	hyaluronate lyase	hysA
NZ_LR130515_3019209_G_A	0.0336	0.0362	-0.737	0.107		NZ_LR130515	3019209	G	A	snp	missense_variant	EW033_RS15945-EW033_RS15950				0.142857	7
NZ_LR130515_2713182_CGTC_TAA	0.15	0.0366	0.387	0.106		NZ_LR130515	2713182	CGTC	TAA	complex	missense_variant	EW033_RS14440-EW033_RS14445				0.5	2
NZ_LR130515_1558939_TAGCCACATTC_GTGCAGTATTT	0.168	0.0367	0.709	0.106	ebh	NZ_LR130515	1558939	TAGCCACATTC	GTGCAGTATTT	complex	missense_variant	EW033_RS07955	ebh	hyperosmolarity resistance protein Ebh	VAK2177TAQ	0.25	4	SAUSA300_1327	cell surface protein	SAUSA300_1327
NZ_LR130515_2857616_GTCTGTTAAT_TTGTGTCAAA	0.0904	0.0367	0.963	0.106	crtN	NZ_LR130515	2857616	GTCTGTTAAT	TTGTGTCAAA	complex	missense_variant	EW033_RS15160	crtI	phytoene desaturase	D397Q	0.5	2	SAUSA300_2498	squalene synthase	crtN	crtN-crtM-crtQ-crtP-crtO
NZ_LR130515_377399_A_C	0.574	0.037	0.763	0.106	gehB	NZ_LR130515	377399	A	C	snp	missense_variant	EW033_RS01790	lip2	YSIRK domain-containing triacylglycerol lipase Lip2/Geh	E204A	0.333333	3	SAUSA300_0320	triacylglycerol lipase	SAUSA300_0320
NZ_LR130515_1952148_A_C	0.0827	0.037	-0.657	0.106	SAUSA300_1739	NZ_LR130515	1952148	A	C	snp	missense_variant	EW033_RS09920		calcium-binding protein	K123T	0.333333	3	SAUSA300_1739	hypothetical protein	SAUSA300_1739
NZ_LR130515_150755_A_G	0.486	0.0371	0.755	0.106	sbnH	NZ_LR130515	150755	A	G	snp	missense_variant	EW033_RS00755	sbnH	staphyloferrin B biosynthesis decarboxylase SbnH	I354V	0.5	2	SAUSA300_0125	pyridoxal-dependent decarboxylase	SAUSA300_0125	sbnA-sbnB-sbnC-sbnD-sbnE-sbnF-sbnG-sbnH-sbnI
NZ_LR130515_197931_T_A	0.145	0.0372	0.658	0.106		NZ_LR130515	197931	T	A	snp	missense_variant	EW033_RS00100				0.333333	3
NZ_LR130515_197950_C_A	0.145	0.0372	0.658	0.106		NZ_LR130515	197950	C	A	snp	missense_variant	EW033_RS00100				0.333333	3
NZ_LR130515_123920_A_G	0.398	0.0374	-0.575	0.106	SAUSA300_0104	NZ_LR130515	123920	A	G	snp	missense_variant	EW033_RS00655		helix-turn-helix domain-containing protein	K565R	0.2	5	SAUSA300_0104	AraC family transcriptional regulator	SAUSA300_0104
NZ_LR130515_321261_CTAAG_C	0.124	0.0374	0.586	0.106		NZ_LR130515	321261	CTAAG	C	del	missense_variant	EW033_RS00100				0.166667	6
NZ_LR130515_2620768_CG_TA	0.0827	0.0375	-0.838	0.106		NZ_LR130515	2620768	CG	TA	complex	missense_variant	EW033_RS13940-EW033_RS13945				0.0909091	11
NZ_LR130515_449156_TG_T	0.0853	0.0377	-1.01	0.106		NZ_LR130515	449156	TG	T	del	missense_variant	EW033_RS00100				0.333333	3
NZ_LR130515_1907383_T_C	0.0543	0.0377	-0.659	0.106	sasC	NZ_LR130515	1907383	T	C	snp	missense_variant	EW033_RS09710	sasC	LPXTG-anchored repetitive surface protein SasC	I1965V	0.142857	7	SAUSA300_1702	cell wall surface anchor family protein	SAUSA300_1702
NZ_LR130515_1001662_T_C	0.716	0.0378	0.35	0.106	SAUSA300_0847	NZ_LR130515	1001662	T	C	snp	missense_variant	EW033_RS05280		PaaI family thioesterase	S122P	0.2	5	SAUSA300_0847	hypothetical protein	SAUSA300_0847	SAUSA300_0846-SAUSA300_0847
NZ_LR130515_1127474_T_C	0.0801	0.0378	-0.927	0.106		NZ_LR130515	1127474	T	C	snp	missense_variant	EW033_RS00100				0.25	4
NZ_LR130515_1035060_TGGG_GGGGC	0.142	0.038	0.447	0.106		NZ_LR130515	1035060	TGGG	GGGGC	complex	missense_variant	EW033_RS00100				0.047619	21
NZ_LR130515_3011890_G_A	0.401	0.038	0.589	0.106	hisG	NZ_LR130515	3011890	G	A	snp	missense_variant	EW033_RS15910		ATP phosphoribosyltransferase	A21V	0.2	5	SAUSA300_2612	ATP phosphoribosyltransferase catalytic subunit	hisG	hisI-hisF-hisA-hisH-hisB-SAUSA300_2610-hisD-hisG-hisZ
NZ_LR130515_249493_G_A	0.354	0.0385	0.724	0.105		NZ_LR130515	249493	G	A	snp	missense_variant	EW033_RS00100				0.333333	3
NZ_LR130515_1908844_TATTCGTA_CATTTGTG	0.0543	0.0385	0.635	0.105	sasC	NZ_LR130515	1908844	TATTCGTA	CATTTGTG	complex	missense_variant	EW033_RS09710	sasC	LPXTG-anchored repetitive surface protein SasC	N1478D	0.0769231	13	SAUSA300_1702	cell wall surface anchor family protein	SAUSA300_1702
NZ_LR130515_2360465_C_T	0.0775	0.0385	-0.847	0.105		NZ_LR130515	2360465	C	T	snp	missense_variant	EW033_RS00100				0.25	4
NZ_LR130515_746760_CT_TA	0.0543	0.0387	0.659	0.105		NZ_LR130515	746760	CT	TA	mnp	missense_variant	EW033_RS00100				0.1	10
NZ_LR130515_2165320_C_A	0.0258	0.0387	0.94	0.105	ktrB	NZ_LR130515	2165320	C	A	snp	missense_variant	EW033_RS11400		TrkH family potassium uptake protein	H5N	0.25	4	SAUSA300_1979	cation transport family protein	SAUSA300_1979
NZ_LR130515_1493378_A_G	0.439	0.0388	0.552	0.105		NZ_LR130515	1493378	A	G	snp	missense_variant	EW033_RS00100				0.111111	9
NZ_LR130515_2112573_AA_TG	0.0233	0.0389	0.998	0.105	EW033_RS11000	NZ_LR130515	2112573	AA	TG	complex	missense_variant	EW033_RS11000		MAP domain-containing protein	L131I	0.5	2
NZ_LR130515_2678347_A_T	0.0233	0.0389	0.998	0.105		NZ_LR130515	2678347	A	T	snp	missense_variant	EW033_RS14225-EW033_RS14230				0.5	2
NZ_LR130515_2577155_A_G	0.574	0.039	0.499	0.105	SAUSA300_2252	NZ_LR130515	2577155	A	G	snp	missense_variant	EW033_RS13715		DUF4870 domain-containing protein	I132V	0.0909091	11	SAUSA300_2252	hypothetical protein	SAUSA300_2252
NZ_LR130515_2839012_AAAACACATAT_GAAAGCATTTA	0.093	0.039	0.718	0.105		NZ_LR130515	2839012	AAAACACATAT	GAAAGCATTTA	complex	missense_variant	EW033_RS15080-EW033_RS15085				0.166667	6
NZ_LR130515_1119708_A_T	0.0491	0.0391	-0.624	0.105		NZ_LR130515	1119708	A	T	snp	missense_variant	EW033_RS00100				0.0909091	11
NZ_LR130515_2742324_CG_TA	0.142	0.0392	0.458	0.105	SAUSA300_2399	NZ_LR130515	2742324	CG	TA	mnp	missense_variant	EW033_RS14585		ATP-binding cassette domain-containing protein	V165I	0.0555556	18	SAUSA300_2399	ABC transporter ATP-binding protein	SAUSA300_2399	SAUSA300_2398-SAUSA300_2399
NZ_LR130515_2638651_T_TA	0.0181	0.0393	-0.685	0.105	hssR	NZ_LR130515	2638651	T	TA	ins	missense_variant	EW033_RS14040	hssR	DNA-binding heme response regulator HssR	N69fs	0.5	2	SAUSA300_2308	response regulator protein	SAUSA300_2308	hssR-hssS
NZ_LR130515_999759_G_A	0.217	0.0394	-0.605	0.105		NZ_LR130515	999759	G	A	snp	missense_variant	EW033_RS00100				0.142857	7
NZ_LR130515_255818_TG_CA	0.501	0.0395	0.62	0.105	SAUSA300_0213	NZ_LR130515	255818	TG	CA	mnp	missense_variant	EW033_RS01205		Gfo/Idh/MocA family oxidoreductase	C116H	0.166667	6	SAUSA300_0213	Gfo/Idh/MocA family oxidoreductase	SAUSA300_0213	SAUSA300_0212-SAUSA300_0213-SAUSA300_0214
NZ_LR130515_124541_C_T	0.504	0.0398	0.624	0.105		NZ_LR130515	124541	C	T	snp	missense_variant	EW033_RS00100				0.25	4
NZ_LR130515_124548_A_T	0.504	0.0398	0.624	0.105		NZ_LR130515	124548	A	T	snp	missense_variant	EW033_RS00100				0.166667	6
NZ_LR130515_1214805_T_C	0.708	0.0398	0.372	0.105	rnhC	NZ_LR130515	1214805	T	C	snp	missense_variant	EW033_RS06345		ribonuclease HIII	K193E	0.5	2	SAUSA300_1039	ribonuclease HIII	rnhC
NZ_LR130515_1603119_G_A	0.121	0.0398	0.559	0.105		NZ_LR130515	1603119	G	A	snp	missense_variant	EW033_RS00100				0.0625	16
NZ_LR130515_2700949_A_G	0.163	0.0398	0.881	0.105		NZ_LR130515	2700949	A	G	snp	missense_variant	EW033_RS14370-EW033_RS14375				0.333333	3
NZ_LR130515_2185495_CT_C	0.0258	0.0399	0.576	0.105		NZ_LR130515	2185495	CT	C	del	missense_variant	EW033_RS00100				0.1	10
NZ_LR130515_2940531_CA_TG	0.406	0.0402	0.555	0.104	SAUSA300_2556	NZ_LR130515	2940531	CA	TG	mnp	missense_variant	EW033_RS15610		ABC transporter permease	V409A	0.125	8	SAUSA300_2556	ABC transporter protein	SAUSA300_2556	SAUSA300_2556-SAUSA300_2557-nsaS-nsaR-SAUSA300_2560
NZ_LR130515_1498875_G_T	0.47	0.0406	0.604	0.104		NZ_LR130515	1498875	G	T	snp	missense_variant	EW033_RS00100				0.25	4
NZ_LR130515_909322_T_C	0.589	0.0407	0.352	0.104	SAUSA300_0748	NZ_LR130515	909322	T	C	snp	missense_variant	EW033_RS04705	rapZ	RNase adapter RapZ	V22A	0.25	4	SAUSA300_0748	hypothetical protein	SAUSA300_0748	SAUSA300_0748-SAUSA300_0749-whiA
NZ_LR130515_2812905_G_A	0.786	0.0407	0.351	0.104		NZ_LR130515	2812905	G	A	snp	missense_variant	EW033_RS14935-EW033_RS14940				0.2	5
NZ_LR130515_716095_T_C	0.0879	0.0409	1.02	0.104		NZ_LR130515	716095	T	C	snp	missense_variant	EW033_RS00100				0.333333	3
NZ_LR130515_2985838_GCTCAG_ACTTAT	0.362	0.041	0.69	0.104	sasA	NZ_LR130515	2985838	GCTCAG	ACTTAT	complex	missense_variant	EW033_RS15780	sasA	serine-rich repeat glycoprotein adhesin SasA	L1363I	0.2	5	SAUSA300_2589	cell wall anchor domain-containing protein	SAUSA300_2589
NZ_LR130515_1135739_T_C	0.0827	0.0411	0.946	0.104		NZ_LR130515	1135739	T	C	snp	missense_variant	EW033_RS00100				0.25	4
NZ_LR130515_2902145_TTACG_ATCTA	0.349	0.0413	0.634	0.104		NZ_LR130515	2902145	TTACG	ATCTA	complex	missense_variant	EW033_RS15400-EW033_RS15405				0.2	5
NZ_LR130515_1404545_T_C	0.0362	0.0414	0.909	0.104		NZ_LR130515	1404545	T	C	snp	missense_variant	EW033_RS00100				0.25	4
NZ_LR130515_2172918_AT_GC	0.191	0.0414	0.614	0.104	SAUSA300_1984	NZ_LR130515	2172918	AT	GC	complex	missense_variant	EW033_RS11445		CPBP family intramembrane metalloprotease	I166A	0.125	8	SAUSA300_1984	hypothetical protein	SAUSA300_1984
NZ_LR130515_182106_G_GA	0.0103	0.0415	0.952	0.104	EW033_RS00910	NZ_LR130515	182106	G	GA	ins	missense_variant	EW033_RS00910		polysaccharide biosynthesis protein	N333fs	0.5	2
NZ_LR130515_1565878_T_TGAGTA	0.0103	0.0415	0.952	0.104	norB	NZ_LR130515	1565878	T	TGAGTA	ins	missense_variant	EW033_RS07960	norB	multidrug efflux MFS transporter NorB	E460fs	0.333333	3	SAUSA300_1328	putative drug transporter	SAUSA300_1328
NZ_LR130515_311142_C_A	0.424	0.0418	0.419	0.104		NZ_LR130515	311142	C	A	snp	missense_variant	EW033_RS00100				0.037037	27
NZ_LR130515_2560749_G_A	0.147	0.0418	0.38	0.104	ydbM	NZ_LR130515	2560749	G	A	snp	missense_variant	EW033_RS13625		acyl-CoA/acyl-ACP dehydrogenase	P279S	0.5	2	SAUSA300_2236	hypothetical protein	SAUSA300_2236
NZ_LR130515_2940539_GT_AA	0.416	0.0418	0.59	0.104	SAUSA300_2556	NZ_LR130515	2940539	GT	AA	mnp	missense_variant	EW033_RS15610		ABC transporter permease	L407F	0.142857	7	SAUSA300_2556	ABC transporter protein	SAUSA300_2556	SAUSA300_2556-SAUSA300_2557-nsaS-nsaR-SAUSA300_2560
NZ_LR130515_2414134_CTAACCGTAAA_TTAATTGTGAG	0.165	0.0419	-0.837	0.103		NZ_LR130515	2414134	CTAACCGTAAA	TTAATTGTGAG	complex	missense_variant	EW033_RS00100				0.142857	7
NZ_LR130515_179935_GAAT_AAGC	0.486	0.042	0.827	0.103	capB	NZ_LR130515	179935	GAAT	AAGC	complex	missense_variant	EW033_RS00900		tyrosine-protein kinase	N99S	0.25	4	SAUSA300_0153	capsular polysaccharide biosynthesis protein Cap5B	cap5B	capA-capB-capC-capD-capE-capF-capG-capH-capI-capJ-capK-capL-capM-capN-capO-capP
NZ_LR130515_179978_A_T	0.486	0.042	0.827	0.103	capB	NZ_LR130515	179978	A	T	snp	missense_variant	EW033_RS00900		tyrosine-protein kinase	T113S	0.333333	3	SAUSA300_0153	capsular polysaccharide biosynthesis protein Cap5B	cap5B	capA-capB-capC-capD-capE-capF-capG-capH-capI-capJ-capK-capL-capM-capN-capO-capP
NZ_LR130515_267333_A_G	0.486	0.042	0.827	0.103		NZ_LR130515	267333	A	G	snp	missense_variant	EW033_RS00100				0.333333	3
NZ_LR130515_269157_C_T	0.486	0.042	0.827	0.103	SAUSA300_0222	NZ_LR130515	269157	C	T	snp	missense_variant	EW033_RS01250		glycerophosphoryl diester phosphodiesterase	S530L	0.333333	3	SAUSA300_0222	hypothetical protein	SAUSA300_0222
NZ_LR130515_276251_A_T	0.486	0.042	0.827	0.103		NZ_LR130515	276251	A	T	snp	missense_variant	EW033_RS00100				0.333333	3
NZ_LR130515_297686_C_A	0.486	0.042	0.827	0.103	SAUSA300_0244	NZ_LR130515	297686	C	A	snp	missense_variant	EW033_RS01390		galactitol-1-phosphate 5-dehydrogenase	Q53K	0.333333	3	SAUSA300_0244	zinc-binding dehydrogenase family oxidoreductase	SAUSA300_0244	SAUSA300_0241-SAUSA300_0242-SAUSA300_0243-SAUSA300_0244
NZ_LR130515_2962600_ACAA_GCAT	0.486	0.042	0.827	0.103	SAUSA300_2575	NZ_LR130515	2962600	ACAA	GCAT	complex	missense_variant	EW033_RS15710		BglG family transcription antiterminator	Q582H	0.333333	3	SAUSA300_2575	BglG family transcriptional antiterminator	SAUSA300_2575	SAUSA300_2575-manP-pmi
NZ_LR130515_2989309_AG_GT	0.486	0.042	0.827	0.103	sasA	NZ_LR130515	2989309	AG	GT	mnp	missense_variant	EW033_RS15780	sasA	serine-rich repeat glycoprotein adhesin SasA	T207N	0.333333	3	SAUSA300_2589	cell wall anchor domain-containing protein	SAUSA300_2589
NZ_LR130515_2989346_GTTT_ATTG	0.486	0.042	0.827	0.103	sasA	NZ_LR130515	2989346	GTTT	ATTG	complex	missense_variant	EW033_RS15780	sasA	serine-rich repeat glycoprotein adhesin SasA	QT194PI	0.333333	3	SAUSA300_2589	cell wall anchor domain-containing protein	SAUSA300_2589
NZ_LR130515_1363013_C_T	0.171	0.0422	0.557	0.103	pnpA	NZ_LR130515	1363013	C	T	snp	missense_variant	EW033_RS07080	pnp	polyribonucleotide nucleotidyltransferase	A236V	0.142857	7	SAUSA300_1167	polynucleotide phosphorylase/polyadenylase	pnpA
NZ_LR130515_2588225_AT_A	0.0413	0.0422	0.463	0.103		NZ_LR130515	2588225	AT	A	del	missense_variant	EW033_RS13765-EW033_RS13770				0.2	5
NZ_LR130515_1101717_AAAAT_CAAAC	0.0801	0.0423	-0.912	0.103		NZ_LR130515	1101717	AAAAT	CAAAC	complex	missense_variant	EW033_RS00100				0.1	10
NZ_LR130515_1101772_C_T	0.0801	0.0423	-0.912	0.103		NZ_LR130515	1101772	C	T	snp	missense_variant	EW033_RS00100				0.25	4
NZ_LR130515_1731310_G_A	0.0801	0.0423	-0.912	0.103		NZ_LR130515	1731310	G	A	snp	missense_variant	EW033_RS00100				0.25	4
NZ_LR130515_1731339_CT_TC	0.0801	0.0423	-0.912	0.103		NZ_LR130515	1731339	CT	TC	complex	missense_variant	EW033_RS00100				0.25	4
NZ_LR130515_291755_T_C	0.238	0.0426	0.391	0.103	EW033_RS01355	NZ_LR130515	291755	T	C	snp	missense_variant	EW033_RS01355		hypothetical protein	Y12H	0.0625	16
NZ_LR130515_2985890_C_T	0.359	0.0428	0.644	0.103	sasA	NZ_LR130515	2985890	C	T	snp	missense_variant	EW033_RS15780	sasA	serine-rich repeat glycoprotein adhesin SasA	G1347D	0.166667	6	SAUSA300_2589	cell wall anchor domain-containing protein	SAUSA300_2589
NZ_LR130515_2985907_CGTTGAAACG_TGTAGAACCA	0.359	0.0428	0.644	0.103	sasA	NZ_LR130515	2985907	CGTTGAAACG	TGTAGAACCA	complex	missense_variant	EW033_RS15780	sasA	serine-rich repeat glycoprotein adhesin SasA	V1339G	0.166667	6	SAUSA300_2589	cell wall anchor domain-containing protein	SAUSA300_2589
NZ_LR130515_376493_G_A	0.532	0.0429	0.408	0.103		NZ_LR130515	376493	G	A	snp	missense_variant	EW033_RS00100				0.0526316	19
NZ_LR130515_542847_A_T	0.0207	0.0429	0.882	0.103	lpl1	NZ_LR130515	542847	A	T	snp	missense_variant	EW033_RS02800		tandem-type lipoprotein	E28D	0.25	4	SAUSA300_0410	tandem lipoprotein	SAUSA300_0410	lpl1-SAUSA300_0411-SAUSA300_0412
NZ_LR130515_891475_A_G	0.742	0.043	0.279	0.103		NZ_LR130515	891475	A	G	snp	missense_variant	EW033_RS00100				0.0454545	22
NZ_LR130515_2496965_A_G	0.142	0.0431	0.551	0.103	hysA	NZ_LR130515	2496965	A	G	snp	missense_variant	EW033_RS13190	hysA	hyaluronate lyase HysA	D457G	0.25	4	SAUSA300_2161	hyaluronate lyase	hysA
NZ_LR130515_536566_T_A	0.0827	0.0432	1.29	0.103		NZ_LR130515	536566	T	A	snp	missense_variant	EW033_RS00100				0.5	2
NZ_LR130515_874654_CAGAA_TAGAC	0.0827	0.0432	1.29	0.103	sstC	NZ_LR130515	874654	CAGAA	TAGAC	complex	missense_variant	EW033_RS04540		ABC transporter ATP-binding protein	N130H	0.333333	3	SAUSA300_0720	putative iron compound ABC transporter ATP-binding protein	SAUSA300_0720	sstA-sstB-sstC-sstD
NZ_LR130515_1010328_G_T	0.0827	0.0432	1.29	0.103		NZ_LR130515	1010328	G	T	snp	missense_variant	EW033_RS00100				0.5	2
NZ_LR130515_1010359_A_C	0.0827	0.0432	1.29	0.103		NZ_LR130515	1010359	A	C	snp	missense_variant	EW033_RS00100				0.5	2
NZ_LR130515_1180464_G_T	0.0827	0.0432	1.29	0.103		NZ_LR130515	1180464	G	T	snp	missense_variant	EW033_RS00100				0.333333	3
NZ_LR130515_1180470_C_T	0.0827	0.0432	1.29	0.103		NZ_LR130515	1180470	C	T	snp	missense_variant	EW033_RS00100				0.5	2
NZ_LR130515_1180511_A_C	0.0827	0.0432	1.29	0.103		NZ_LR130515	1180511	A	C	snp	missense_variant	EW033_RS00100				0.5	2
NZ_LR130515_1532291_T_G	0.0827	0.0432	1.29	0.103		NZ_LR130515	1532291	T	G	snp	missense_variant	EW033_RS00100				0.5	2
NZ_LR130515_1565366_T_A	0.0827	0.0432	1.29	0.103	ebh	NZ_LR130515	1565366	T	A	snp	missense_variant	EW033_RS07955	ebh	hyperosmolarity resistance protein Ebh	Q36H	0.5	2	SAUSA300_1327	cell surface protein	SAUSA300_1327
NZ_LR130515_1571584_A_C	0.0827	0.0432	1.29	0.103	SAUSA300_1332	NZ_LR130515	1571584	A	C	snp	missense_variant	EW033_RS07980		5'-3' exonuclease	S264A	0.5	2	SAUSA300_1332	putative 5'-3' exonuclease	SAUSA300_1332	SAUSA300_1332-dynA
NZ_LR130515_1885052_TATTC_AATTA	0.0827	0.0432	1.29	0.103		NZ_LR130515	1885052	TATTC	AATTA	complex	missense_variant	EW033_RS00100				0.5	2
NZ_LR130515_2087558_TAC_T	0.0827	0.0432	1.29	0.103	nadE	NZ_LR130515	2087558	TAC	T	del	missense_variant	EW033_RS10855	nadE	ammonia-dependent NAD(+) synthetase	R17fs	0.5	2	SAUSA300_1893	NAD synthetase	nadE	nadE-pncB
NZ_LR130515_2087565_T_TTC	0.0827	0.0432	1.29	0.103	nadE	NZ_LR130515	2087565	T	TTC	ins	missense_variant	EW033_RS10855	nadE	ammonia-dependent NAD(+) synthetase	R17fs	0.5	2	SAUSA300_1893	NAD synthetase	nadE	nadE-pncB
NZ_LR130515_2319272_C_T	0.0827	0.0432	1.29	0.103		NZ_LR130515	2319272	C	T	snp	missense_variant	EW033_RS00100				0.5	2
NZ_LR130515_2411445_GTGT_ATGC	0.0827	0.0432	1.29	0.103	pdp	NZ_LR130515	2411445	GTGT	ATGC	complex	missense_variant	EW033_RS12785		pyrimidine-nucleoside phosphorylase	T15A	0.5	2	SAUSA300_2089	pyrimidine-nucleoside phosphorylase	pdp
NZ_LR130515_2435976_T_A	0.0827	0.0432	1.29	0.103	fmtB	NZ_LR130515	2435976	T	A	snp	missense_variant	EW033_RS12905		DUF1542 domain-containing protein	Q2407H	0.5	2	SAUSA300_2109	truncated FmtB protein	fmtB
NZ_LR130515_241679_T_G	0.568	0.0434	0.716	0.103	SAUSA300_0201	NZ_LR130515	241679	T	G	snp	missense_variant	EW033_RS01150		ABC transporter permease	D265E	0.25	4	SAUSA300_0201	peptide ABC transporter permease	SAUSA300_0201	SAUSA300_0201-SAUSA300_0202-SAUSA300_0203-ggt
NZ_LR130515_781227_C_T	0.0801	0.0435	-0.898	0.103		NZ_LR130515	781227	C	T	snp	missense_variant	EW033_RS00100				0.25	4
NZ_LR130515_114443_CGTTAAATT_TATTAGATA	0.0413	0.0436	-0.748	0.103		NZ_LR130515	114443	CGTTAAATT	TATTAGATA	complex	missense_variant	EW033_RS00100				0.0833333	12
NZ_LR130515_229128_TTTGGATT_ATTGAATC	0.463	0.0436	0.787	0.103	glcA	NZ_LR130515	229128	TTTGGATT	ATTGAATC	complex	missense_variant	EW033_RS01105		PTS transporter subunit EIIC	T195S	0.25	4	SAUSA300_0191	PTS system glucose-specific IIBC subunit	ptsG
NZ_LR130515_2860551_C_T	0.463	0.0436	0.787	0.103	crtQ	NZ_LR130515	2860551	C	T	snp	missense_variant	EW033_RS15170		glycosyltransferase family 2 protein	A99T	0.25	4	SAUSA300_2500	glycosyl transferase	SAUSA300_2500	crtN-crtM-crtQ-crtP-crtO
NZ_LR130515_2745961_G_A	0.235	0.0437	0.634	0.103		NZ_LR130515	2745961	G	A	snp	missense_variant	EW033_RS14610-EW033_RS14615				0.25	4
NZ_LR130515_2745986_C_T	0.235	0.0437	0.634	0.103		NZ_LR130515	2745986	C	T	snp	missense_variant	EW033_RS14610-EW033_RS14615				0.25	4
NZ_LR130515_2745994_ATTAAGTT_GATAAATC	0.235	0.0437	0.634	0.103	SAUSA300_2404	NZ_LR130515	2745994	ATTAAGTT	GATAAATC	complex	missense_variant	EW033_RS14615		FMN-binding glutamate synthase family protein	527	0.25	4	SAUSA300_2404	hypothetical protein	SAUSA300_2404
NZ_LR130515_3040961_A_T	0.437	0.0437	0.574	0.103		NZ_LR130515	3040961	A	T	snp	missense_variant	EW033_RS16050-EW033_RS16055				0.333333	3
NZ_LR130515_794223_AG_GA	0.163	0.0438	0.916	0.103	graS	NZ_LR130515	794223	AG	GA	complex	missense_variant	EW033_RS04130		sensor histidine kinase	K70R	0.25	4	SAUSA300_0646	sensor histidine kinase	SAUSA300_0646	graX-graR-graS
NZ_LR130515_794233_C_A	0.163	0.0438	0.916	0.103	graS	NZ_LR130515	794233	C	A	snp	missense_variant	EW033_RS04130		sensor histidine kinase	D73E	0.25	4	SAUSA300_0646	sensor histidine kinase	SAUSA300_0646	graX-graR-graS
NZ_LR130515_2850216_CC_GG	0.411	0.0438	0.626	0.103	SAUSA300_2492	NZ_LR130515	2850216	CC	GG	mnp	missense_variant	EW033_RS15130		sugar O-acetyltransferase	EV187DL	0.25	4	SAUSA300_2492	acetyltransferase family protein	SAUSA300_2492
NZ_LR130515_209812_G_T	0.434	0.0439	0.657	0.102		NZ_LR130515	209812	G	T	snp	missense_variant	EW033_RS00100				0.25	4
NZ_LR130515_2430223_T_G	0.612	0.0439	0.353	0.103	mtlF	NZ_LR130515	2430223	T	G	snp	missense_variant	EW033_RS12885		PTS mannitol transporter subunit IICB	F14V	0.333333	3	SAUSA300_2105	PTS system, mannitol specific IIBC component	mtlF	mtlF-mtlR-mtlA-mtlD
NZ_LR130515_1606816_A_T	0.649	0.044	0.659	0.102		NZ_LR130515	1606816	A	T	snp	missense_variant	EW033_RS00100				0.2	5
NZ_LR130515_2979643_A_G	0.0491	0.044	-0.718	0.102	asp3	NZ_LR130515	2979643	A	G	snp	missense_variant	EW033_RS15760	asp3	accessory Sec system protein Asp3	S190P	0.25	4	SAUSA300_2585	hypothetical protein	SAUSA300_2585	gtfB-gtfA-secA2-asp3-asp2-asp1-secY2
NZ_LR130515_1748984_T_C	0.351	0.0441	0.455	0.102		NZ_LR130515	1748984	T	C	snp	missense_variant	EW033_RS00100				0.0625	16
NZ_LR130515_170391_T_A	0.571	0.0442	0.689	0.102	SAUSA300_0146	NZ_LR130515	170391	T	A	snp	missense_variant	EW033_RS00870		hypothetical protein	N3K	0.2	5	SAUSA300_0146	hypothetical protein	SAUSA300_0146	SAUSA300_0146-SAUSA300_0147
NZ_LR130515_1922500_G_A	0.0103	0.0442	-0.926	0.102		NZ_LR130515	1922500	G	A	snp	missense_variant	EW033_RS00100				0.5	2
NZ_LR130515_947957_G_A	0.134	0.0443	-0.652	0.102	aroD	NZ_LR130515	947957	G	A	snp	missense_variant	EW033_RS04920		type I 3-dehydroquinate dehydratase	A11T	0.333333	3	SAUSA300_0787	3-dehydroquinate dehydratase	aroD
NZ_LR130515_1477644_A_G	0.0336	0.0443	0.897	0.102		NZ_LR130515	1477644	A	G	snp	missense_variant	EW033_RS00100				0.333333	3
NZ_LR130515_1955243_A_T	0.563	0.0443	-0.509	0.102	SAUSA300_1744	NZ_LR130515	1955243	A	T	snp	missense_variant	EW033_RS09940		hypothetical protein	Ter184Yext*?	0.2	5	SAUSA300_1744	hypothetical protein	SAUSA300_1744
NZ_LR130515_2706779_G_A	0.134	0.0443	-0.652	0.102	bioA	NZ_LR130515	2706779	G	A	snp	missense_variant	EW033_RS14405	bioA	adenosylmethionine--8-amino-7-oxononanoate transaminase	R344C	0.25	4	SAUSA300_2372	adenosylmethionine-8-amino-7-oxononanoate aminotransferase	bioA	bioX-bioW-bioF-bioB-bioA-bioD
NZ_LR130515_3030175_C_A	0.0749	0.0443	-0.769	0.102		NZ_LR130515	3030175	C	A	snp	missense_variant	EW033_RS15990-EW033_RS15995				0.166667	6
NZ_LR130515_21634_T_TA	0.287	0.0444	0.275	0.102	dnaC	NZ_LR130515	21634	T	TA	ins	missense_variant	EW033_RS00085	dnaB	replicative DNA helicase	D464fs	0.0625	16	SAUSA300_0016	replicative DNA helicase	dnaB	SAUSA300_0013-gdpP-rplI-dnaC
NZ_LR130515_1470905_G_A	0.145	0.0444	0.375	0.102	trpC	NZ_LR130515	1470905	G	A	snp	missense_variant	EW033_RS07610	trpC	indole-3-glycerol phosphate synthase TrpC	A41T	0.5	2	SAUSA300_1265	indole-3-glycerol-phosphate synthase	trpC	trpE-trpG-trpD-trpC-trpF-trpB-trpA
NZ_LR130515_469411_ACTCCTTAACTT_TTTCTTTCACTG	0.0775	0.0448	-0.935	0.102		NZ_LR130515	469411	ACTCCTTAACTT	TTTCTTTCACTG	complex	missense_variant	EW033_RS00100				0.25	4
NZ_LR130515_469432_CTAATGT_TTAAATA	0.0775	0.0448	-0.935	0.102		NZ_LR130515	469432	CTAATGT	TTAAATA	complex	missense_variant	EW033_RS00100				0.111111	9
NZ_LR130515_752813_ATGAA_CTAAG	0.186	0.0448	0.972	0.102	SAUSA300_0604	NZ_LR130515	752813	ATGAA	CTAAG	complex	missense_variant	EW033_RS03910		alpha/beta hydrolase	MN251LS	0.333333	3	SAUSA300_0604	alpha/beta fold family hydrolase	SAUSA300_0604
NZ_LR130515_1887674_A_G	0.654	0.0448	0.744	0.102	murC	NZ_LR130515	1887674	A	G	snp	missense_variant	EW033_RS09625		UDP-N-acetylmuramate--L-alanine ligase	M237T	0.5	2	SAUSA300_1686	UDP-N-acetylmuramate--L-alanine ligase	murC	murC-ftsK-SAUSA300_1688-SAUSA300_1689-SAUSA300_1690-SAUSA300_1691
NZ_LR130515_1542773_G_T	0.0129	0.0449	0.819	0.102	ebh	NZ_LR130515	1542773	G	T	snp	missense_variant	EW033_RS07955	ebh	hyperosmolarity resistance protein Ebh	N7567K	0.5	2	SAUSA300_1327	cell surface protein	SAUSA300_1327
NZ_LR130515_1823847_A_C	0.173	0.0449	-0.881	0.102	phoR	NZ_LR130515	1823847	A	C	snp	missense_variant	EW033_RS09335		PAS domain S-box protein	I210M	0.25	4	SAUSA300_1638	sensory box histidine kinase PhoR	phoR	phoR-phoP
NZ_LR130515_152625_T_C	0.284	0.045	0.565	0.102		NZ_LR130515	152625	T	C	snp	missense_variant	EW033_RS00100				0.142857	7
NZ_LR130515_621427_G_A	0.129	0.0453	-0.822	0.102		NZ_LR130515	621427	G	A	snp	missense_variant	EW033_RS00100				0.333333	3
NZ_LR130515_1332111_AGGGA_GGGGGC	0.0233	0.0454	-0.668	0.102	dprA	NZ_LR130515	1332111	AGGGA	GGGGGC	complex	missense_variant	EW033_RS06940	dprA	DNA-protecting protein DprA	E33fs	0.5	2	SAUSA300_1142	DNA protecting protein DprA	dprA	dprA-topA
NZ_LR130515_1933626_CTCGAT_TGCGAC	0.235	0.0455	0.582	0.102	sigS	NZ_LR130515	1933626	CTCGAT	TGCGAC	complex	missense_variant	EW033_RS09820		RNA polymerase sigma factor	T59M	0.125	8	SAUSA300_1722	hypothetical protein	SAUSA300_1722
NZ_LR130515_876439_C_T	0.124	0.0456	-0.921	0.102		NZ_LR130515	876439	C	T	snp	missense_variant	EW033_RS00100				0.5	2
NZ_LR130515_915149_G_A	0.124	0.0456	-0.921	0.102		NZ_LR130515	915149	G	A	snp	missense_variant	EW033_RS00100				0.5	2
NZ_LR130515_1055433_C_A	0.124	0.0456	-0.921	0.102	opp-3A	NZ_LR130515	1055433	C	A	snp	missense_variant	EW033_RS05515		peptide ABC transporter substrate-binding protein	D369E	0.5	2	SAUSA300_0891	oligopeptide ABC transporter substrate-binding protein	oppA	opp-3B-opp-3C-opp-3D-opp-3F-opp-3A
NZ_LR130515_1346251_T_G	0.124	0.0456	-0.921	0.102	cdsA	NZ_LR130515	1346251	T	G	snp	missense_variant	EW033_RS07010		phosphatidate cytidylyltransferase	S260A	0.5	2	SAUSA300_1154	phosphatidate cytidylyltransferase	cdsA	uppS-cdsA
NZ_LR130515_1493594_G_A	0.124	0.0456	-0.921	0.102		NZ_LR130515	1493594	G	A	snp	missense_variant	EW033_RS00100				0.5	2
NZ_LR130515_2719180_A_C	0.124	0.0456	-0.921	0.102	SAUSA300_2382	NZ_LR130515	2719180	A	C	snp	missense_variant	EW033_RS14475		phosphohydrolase	S92R	0.166667	6	SAUSA300_2382	hypothetical protein	SAUSA300_2382
NZ_LR130515_3033416_T_A	0.537	0.0459	-0.381	0.102		NZ_LR130515	3033416	T	A	snp	missense_variant	EW033_RS16005-EW033_RS16010				0.047619	21
NZ_LR130515_2062085_T_C	0.289	0.046	0.713	0.101	murT	NZ_LR130515	2062085	T	C	snp	missense_variant	EW033_RS10730		Mur ligase family protein	T284A	0.333333	3	SAUSA300_1873	Mur ligase family protein	SAUSA300_1873	gatD-murT
NZ_LR130515_2060991_C_T	0.145	0.0463	0.363	0.101	gatD	NZ_LR130515	2060991	C	T	snp	missense_variant	EW033_RS10725		type 1 glutamine amidotransferase	R210H	0.5	2	SAUSA300_1872	hypothetical protein	SAUSA300_1872	gatD-murT
NZ_LR130515_273564_T_C	0.202	0.0465	0.591	0.101	fadA	NZ_LR130515	273564	T	C	snp	missense_variant	EW033_RS01270		thiolase family protein	T77A	0.25	4	SAUSA300_0225	putative acyl-CoA acetyltransferase FadA	SAUSA300_0225	fadA-fadB
NZ_LR130515_1236065_GCAG_ATAT	0.251	0.0465	0.807	0.101	hla	NZ_LR130515	1236065	GCAG	ATAT	complex	missense_variant	EW033_RS06475		beta-channel forming cytolysin	L78I	0.333333	3	SAUSA300_1058	alpha-hemolysin	SAUSA300_1058
NZ_LR130515_1180413_G_T	0.426	0.0466	0.261	0.101		NZ_LR130515	1180413	G	T	snp	missense_variant	EW033_RS00100				0.047619	21
NZ_LR130515_2905487_A_G	0.375	0.0468	0.722	0.101	SAUSA300_2529	NZ_LR130515	2905487	A	G	snp	missense_variant	EW033_RS15420		glyoxalase/bleomycin resistance/extradiol dioxygenase family protein	I128V	0.25	4	SAUSA300_2529	hypothetical protein	SAUSA300_2529
NZ_LR130515_2990655_A_C	0.209	0.0468	-0.675	0.101	SAUSA300_2590	NZ_LR130515	2990655	A	C	snp	missense_variant	EW033_RS15785		flavin reductase family protein	F172V	0.2	5	SAUSA300_2590	hypothetical protein	SAUSA300_2590
NZ_LR130515_1167220_C_CT	0.0103	0.0469	-0.86	0.101		NZ_LR130515	1167220	C	CT	ins	missense_variant	EW033_RS00100				0.142857	7
NZ_LR130515_2422738_G_A	0.713	0.0469	0.357	0.101		NZ_LR130515	2422738	G	A	snp	missense_variant	EW033_RS00100				0.333333	3
NZ_LR130515_2808555_CTGGG_TTGGA	0.276	0.0469	-0.805	0.101	mhqE	NZ_LR130515	2808555	CTGGG	TTGGA	complex	missense_variant	EW033_RS14910		alpha/beta hydrolase	V130I	0.25	4	SAUSA300_2457	phospholipase/carboxylesterase family protein	SAUSA300_2457	mhqE-mhqD
NZ_LR130515_2973178_T_C	0.114	0.0469	-0.769	0.101	sasF	NZ_LR130515	2973178	T	C	snp	missense_variant	EW033_RS15740	sasF	cell-wall-anchored protein SasF	H192R	0.25	4	SAUSA300_2581	putative surface anchored protein	SAUSA300_2581
NZ_LR130515_2998911_A_G	0.114	0.0469	-0.769	0.101		NZ_LR130515	2998911	A	G	snp	missense_variant	EW033_RS15840-EW033_RS15845				0.25	4
NZ_LR130515_3009474_A_G	0.114	0.0469	-0.769	0.101	SAUSA300_2610	NZ_LR130515	3009474	A	G	snp	missense_variant	EW033_RS15900		histidinol-phosphate aminotransferase family protein	V202A	0.25	4	SAUSA300_2610	histidinol-phosphate aminotransferase hisC	hisC	hisI-hisF-hisA-hisH-hisB-SAUSA300_2610-hisD-hisG-hisZ
NZ_LR130515_145269_A_G	0.377	0.047	0.68	0.101	sbnD	NZ_LR130515	145269	A	G	snp	missense_variant	EW033_RS00735	sbnD	staphyloferrin B export MFS transporter	I356V	0.2	5	SAUSA300_0121	putative drug transporter	SAUSA300_0121	sbnA-sbnB-sbnC-sbnD-sbnE-sbnF-sbnG-sbnH-sbnI
NZ_LR130515_1285073_ACCAT_GCAA	0.473	0.0471	0.459	0.101		NZ_LR130515	1285073	ACCAT	GCAA	complex	missense_variant	EW033_RS00100				0.0833333	12
NZ_LR130515_1329410_CGCA_TGCG	0.0904	0.0471	-0.658	0.101		NZ_LR130515	1329410	CGCA	TGCG	complex	missense_variant	EW033_RS00100				0.1	10
NZ_LR130515_423230_T_G	0.38	0.0472	0.798	0.101	SAUSA300_0321	NZ_LR130515	423230	T	G	snp	missense_variant	EW033_RS02120		alpha/beta hydrolase	E15A	0.333333	3	SAUSA300_0321	hypothetical protein	SAUSA300_0321	SAUSA300_0321-SAUSA300_0322
NZ_LR130515_2870111_AGC_TGT	0.38	0.0472	0.798	0.101		NZ_LR130515	2870111	AGC	TGT	complex	missense_variant	EW033_RS15210-EW033_RS15215				0.2	5
NZ_LR130515_2872680_T_G	0.38	0.0472	0.798	0.101	SAUSA300_2514	NZ_LR130515	2872680	T	G	snp	missense_variant	EW033_RS15235		DUF2316 family protein	K47T	0.333333	3	SAUSA300_2514	hypothetical protein	SAUSA300_2514	SAUSA300_2512-SAUSA300_2513-SAUSA300_2514
NZ_LR130515_200196_GT_G	0.114	0.0473	0.539	0.101		NZ_LR130515	200196	GT	G	del	missense_variant	EW033_RS00100				0.2	5
NZ_LR130515_2577557_T_C	0.757	0.0473	0.32	0.101	SAUSA300_2253	NZ_LR130515	2577557	T	C	snp	missense_variant	EW033_RS13720		CHAP domain-containing protein	M46T	0.5	2	SAUSA300_2253	secretory antigen precursor SsaA	ssaA
NZ_LR130515_451439_TG_GT	0.217	0.0475	0.646	0.101	SAUSA300_0353	NZ_LR130515	451439	TG	GT	mnp	missense_variant	EW033_RS02285		ABC-2 transporter permease	C144V	0.333333	3	SAUSA300_0353	hypothetical protein	SAUSA300_0353	SAUSA300_0350-SAUSA300_0351-SAUSA300_0352-SAUSA300_0353
NZ_LR130515_1396977_A_G	0.0698	0.0475	0.747	0.101	SAUSA300_1194	NZ_LR130515	1396977	A	G	snp	missense_variant	EW033_RS07220		alpha/beta hydrolase	T2A	0.2	5	SAUSA300_1194	alpha/beta fold family hydrolase	SAUSA300_1194	SAUSA300_1194-miaA-hfq
NZ_LR130515_2688398_T_A	0.0853	0.0475	-1.17	0.101	EW033_RS14290	NZ_LR130515	2688398	T	A	snp	missense_variant	EW033_RS14290		hypothetical protein	L10F	0.5	2
NZ_LR130515_247393_T_A	0.297	0.0476	-0.39	0.101		NZ_LR130515	247393	T	A	snp	missense_variant	EW033_RS00100				0.0526316	19
NZ_LR130515_1527871_A_G	0.439	0.0476	0.329	0.101	fakB2	NZ_LR130515	1527871	A	G	snp	missense_variant	EW033_RS07905	fakB2	fatty acid kinase FakB2	F81S	0.333333	3	SAUSA300_1318	hypothetical protein	SAUSA300_1318	fakB2-dfrA
NZ_LR130515_2702051_G_A	0.705	0.0479	0.356	0.101	hlgC	NZ_LR130515	2702051	G	A	snp	missense_variant	EW033_RS14375	hlgC	bi-component gamma-hemolysin HlgCB subunit C	R288H	0.333333	3	SAUSA300_2366	gamma-hemolysin component C	hlgC	hlgC-hlgB
NZ_LR130515_2930313_C_T	0.571	0.0479	0.679	0.101		NZ_LR130515	2930313	C	T	snp	missense_variant	EW033_RS15550-EW033_RS15555				0.2	5
NZ_LR130515_127341_G_T	0.093	0.0482	-0.929	0.101		NZ_LR130515	127341	G	T	snp	missense_variant	EW033_RS00100				0.5	2
NZ_LR130515_2012861_T_A	0.152	0.0482	0.759	0.1		NZ_LR130515	2012861	T	A	snp	missense_variant	EW033_RS00100				0.333333	3
NZ_LR130515_310263_A_T	0.434	0.0483	0.536	0.1		NZ_LR130515	310263	A	T	snp	missense_variant	EW033_RS00100				0.1	10
NZ_LR130515_3040949_ATC_TTA	0.0233	0.0484	-0.816	0.1		NZ_LR130515	3040949	ATC	TTA	complex	missense_variant	EW033_RS16050-EW033_RS16055				0.333333	3
NZ_LR130515_120175_GG_TA	0.214	0.0485	-0.518	0.1	plc	NZ_LR130515	120175	GG	TA	complex	missense_variant	EW033_RS00645		phosphatidylinositol-specific phospholipase C	W20L	0.125	8	SAUSA300_0099	1-phosphatidylinositol phosphodiesterase	plc
NZ_LR130515_1822674_T_A	0.183	0.0487	0.893	0.1		NZ_LR130515	1822674	T	A	snp	missense_variant	EW033_RS00100				0.125	8
NZ_LR130515_322261_C_A	0.47	0.0488	0.643	0.1	EW033_RS01500	NZ_LR130515	322261	C	A	snp	missense_variant	EW033_RS01500		hypothetical protein	T19K	0.25	4
NZ_LR130515_777256_G_A	0.0439	0.0488	-0.649	0.1		NZ_LR130515	777256	G	A	snp	missense_variant	EW033_RS00100				0.333333	3
NZ_LR130515_1954607_CGAATG_AGAACC	0.0439	0.0488	-0.649	0.1		NZ_LR130515	1954607	CGAATG	AGAACC	complex	missense_variant	EW033_RS00100				0.333333	3
NZ_LR130515_1954619_CGTGAG_TGTGGA	0.0439	0.0488	-0.649	0.1		NZ_LR130515	1954619	CGTGAG	TGTGGA	complex	missense_variant	EW033_RS00100				0.1	10
NZ_LR130515_1871405_TA_T	0.37	0.0493	-0.487	0.1		NZ_LR130515	1871405	TA	T	del	missense_variant	EW033_RS00100				0.111111	9
NZ_LR130515_1954421_G_A	0.439	0.0493	-0.441	0.1	SAUSA300_1743	NZ_LR130515	1954421	G	A	snp	missense_variant	EW033_RS09935		DUF3969 family protein	V58I	0.2	5	SAUSA300_1743	hypothetical protein	SAUSA300_1743	SAUSA300_1741-SAUSA300_1742-SAUSA300_1743
NZ_LR130515_14096_C_A	0.14	0.0495	0.373	0.0999		NZ_LR130515	14096	C	A	snp	missense_variant	EW033_RS00050-EW033_RS00055				0.0769231	13
NZ_LR130515_208462_C_A	0.14	0.0495	0.373	0.0999	SAUSA300_0180	NZ_LR130515	208462	C	A	snp	missense_variant	EW033_RS01045		MFS transporter	Y45*	0.25	4	SAUSA300_0180	integral membrane protein LmrP	SAUSA300_0180
NZ_LR130515_1492822_G_C	0.14	0.0495	0.373	0.0999	SAUSA300_1285	NZ_LR130515	1492822	G	C	snp	missense_variant	EW033_RS07720		ATP-binding cassette domain-containing protein	L361F	0.2	5	SAUSA300_1285	ABC transporter ATP-binding protein	SAUSA300_1285
NZ_LR130515_2159303_T_C	0.14	0.0495	0.373	0.0999	lukG	NZ_LR130515	2159303	T	C	snp	missense_variant	EW033_RS11375	lukG	bi-component leukocidin LukGH subunit G	K308E	0.142857	7	SAUSA300_1974	leukocidin/hemolysin toxin family protein	SAUSA300_1974	lukG-lukH
NZ_LR130515_530250_A_G	0.199	0.0496	0.643	0.0999	ssl5	NZ_LR130515	530250	A	G	snp	missense_variant	EW033_RS02740		superantigen-like protein SSL5	T4A	0.25	4	SAUSA300_0399	superantigen-like protein 5	SAUSA300_0399
NZ_LR130515_2688364_C_T	0.22	0.0496	-0.469	0.0999	EW033_RS14290	NZ_LR130515	2688364	C	T	snp	missense_variant	EW033_RS14290		hypothetical protein	D22N	0.0588235	17
NZ_LR130515_219418_CAA_TAC	0.0956	0.0497	-1.08	0.0998	argB	NZ_LR130515	219418	CAA	TAC	complex	missense_variant	EW033_RS01065	argB	acetylglutamate kinase	L101V	0.5	2	SAUSA300_0184	acetylglutamate kinase	argB	argB-argJ-argC-argD
NZ_LR130515_219500_T_C	0.0956	0.0497	-1.08	0.0998	argB	NZ_LR130515	219500	T	C	snp	missense_variant	EW033_RS01065	argB	acetylglutamate kinase	H74R	0.5	2	SAUSA300_0184	acetylglutamate kinase	argB	argB-argJ-argC-argD
NZ_LR130515_236071_GTG_ATT	0.0956	0.0497	-1.08	0.0998	hsdR	NZ_LR130515	236071	GTG	ATT	complex	missense_variant	EW033_RS01135		type I restriction endonuclease subunit R	V265I	0.333333	3	SAUSA300_0196	type I restriction-modification enzyme, R subunit	hsdR
NZ_LR130515_241237_C_T	0.0956	0.0497	-1.08	0.0998	SAUSA300_0201	NZ_LR130515	241237	C	T	snp	missense_variant	EW033_RS01150		ABC transporter permease	S118L	0.5	2	SAUSA300_0201	peptide ABC transporter permease	SAUSA300_0201	SAUSA300_0201-SAUSA300_0202-SAUSA300_0203-ggt
NZ_LR130515_553479_G_A	0.0956	0.0497	-1.08	0.0998	mpsB	NZ_LR130515	553479	G	A	snp	missense_variant	EW033_RS02870		YbcC family protein	A112T	0.5	2	SAUSA300_0426	hypothetical protein	SAUSA300_0426	mpsA-mpsB
NZ_LR130515_650560_C_T	0.0956	0.0497	-1.08	0.0998	gltX	NZ_LR130515	650560	C	T	snp	missense_variant	EW033_RS03365		glutamate--tRNA ligase	A420V	0.5	2	SAUSA300_0513	glutamyl-tRNA synthetase	gltX
NZ_LR130515_879998_C_T	0.0956	0.0497	-1.08	0.0998		NZ_LR130515	879998	C	T	snp	missense_variant	EW033_RS00100				0.5	2
NZ_LR130515_933698_T_C	0.0956	0.0497	-1.08	0.0998	clfA	NZ_LR130515	933698	T	C	snp	missense_variant	EW033_RS04835	clfA	MSCRAMM family adhesin clumping factor ClfA	V113A	0.5	2	SAUSA300_0772	clumping factor A	clfA
NZ_LR130515_933797_G_A	0.0956	0.0497	-1.08	0.0998	clfA	NZ_LR130515	933797	G	A	snp	missense_variant	EW033_RS04835	clfA	MSCRAMM family adhesin clumping factor ClfA	S146N	0.5	2	SAUSA300_0772	clumping factor A	clfA
NZ_LR130515_1092148_T_A	0.0956	0.0497	-1.08	0.0998	htrA2	NZ_LR130515	1092148	T	A	snp	missense_variant	EW033_RS05690		serine protease	N37K	0.5	2	SAUSA300_0923	serine protease	htrA	htrA2-ktrD
NZ_LR130515_1092657_G_A	0.0956	0.0497	-1.08	0.0998	htrA2	NZ_LR130515	1092657	G	A	snp	missense_variant	EW033_RS05690		serine protease	G207E	0.5	2	SAUSA300_0923	serine protease	htrA	htrA2-ktrD
NZ_LR130515_1246301_A_T	0.0956	0.0497	-1.08	0.0998		NZ_LR130515	1246301	A	T	snp	missense_variant	EW033_RS00100				0.5	2
NZ_LR130515_1326424_T_C	0.0956	0.0497	-1.08	0.0998	rnhB	NZ_LR130515	1326424	T	C	snp	missense_variant	EW033_RS06915		ribonuclease HII	V56A	0.5	2	SAUSA300_1137	ribonuclease HII	rnhB	rbgA-rnhB
NZ_LR130515_1350794_G_A	0.0956	0.0497	-1.08	0.0998	polC	NZ_LR130515	1350794	G	A	snp	missense_variant	EW033_RS07025		PolC-type DNA polymerase III	G352S	0.5	2	SAUSA300_1157	DNA polymerase III PolC	polC
NZ_LR130515_1712159_A_T	0.0956	0.0497	-1.08	0.0998		NZ_LR130515	1712159	A	T	snp	missense_variant	EW033_RS00100				0.142857	7
NZ_LR130515_1755417_T_C	0.0956	0.0497	-1.08	0.0998		NZ_LR130515	1755417	T	C	snp	missense_variant	EW033_RS00100				0.5	2
NZ_LR130515_1907648_CT_AC	0.0956	0.0497	-1.08	0.0998	sasC	NZ_LR130515	1907648	CT	AC	mnp	missense_variant	EW033_RS09710	sasC	LPXTG-anchored repetitive surface protein SasC	E1876G	0.333333	3	SAUSA300_1702	cell wall surface anchor family protein	SAUSA300_1702
NZ_LR130515_2748534_T_C	0.0956	0.0497	-1.08	0.0998		NZ_LR130515	2748534	T	C	snp	missense_variant	EW033_RS14620-EW033_RS14625				0.333333	3
NZ_LR130515_779282_G_A	0.14	0.0499	-0.623	0.0998		NZ_LR130515	779282	G	A	snp	missense_variant	EW033_RS00100				0.5	2
NZ_LR130515_1433167_A_T	0.214	0.0499	0.528	0.0997		NZ_LR130515	1433167	A	T	snp	missense_variant	EW033_RS00100				0.166667	6
NZ_LR130515_2034095_GTTTC_ATTTT	0.093	0.0499	-0.589	0.0998	SAUSA300_1844	NZ_LR130515	2034095	GTTTC	ATTTT	complex	missense_variant	EW033_RS10560		thioredoxin-dependent thiol peroxidase	H83Y	0.333333	3	SAUSA300_1844	bacterioferritin comigratory protein	SAUSA300_1844	perR-SAUSA300_1843-SAUSA300_1844
NZ_LR130515_422235_TTTT_AATC	0.437	0.05	0.537	0.0997		NZ_LR130515	422235	TTTT	AATC	complex	missense_variant	EW033_RS00100				0.125	8
NZ_LR130515_16644_T_A	0.0956	0.0501	-0.858	0.0997		NZ_LR130515	16644	T	A	snp	missense_variant	EW033_RS00065-EW033_RS00070				0.333333	3
NZ_LR130515_2984797_TGCTGGC_CGCTCGT	0.0956	0.0501	-0.858	0.0997	sasA	NZ_LR130515	2984797	TGCTGGC	CGCTCGT	complex	missense_variant	EW033_RS15780	sasA	serine-rich repeat glycoprotein adhesin SasA	P1710R	0.2	5	SAUSA300_2589	cell wall anchor domain-containing protein	SAUSA300_2589
NZ_LR130515_2984822_A_G	0.0956	0.0501	-0.858	0.0997	sasA	NZ_LR130515	2984822	A	G	snp	missense_variant	EW033_RS15780	sasA	serine-rich repeat glycoprotein adhesin SasA	V1703A	0.333333	3	SAUSA300_2589	cell wall anchor domain-containing protein	SAUSA300_2589
NZ_LR130515_2986647_C_T	0.0956	0.0501	-0.858	0.0997	sasA	NZ_LR130515	2986647	C	T	snp	missense_variant	EW033_RS15780	sasA	serine-rich repeat glycoprotein adhesin SasA	A1095T	0.25	4	SAUSA300_2589	cell wall anchor domain-containing protein	SAUSA300_2589
NZ_LR130515_3009280_T_G	0.0956	0.0501	-0.858	0.0997	SAUSA300_2610	NZ_LR130515	3009280	T	G	snp	missense_variant	EW033_RS15900		histidinol-phosphate aminotransferase family protein	N267H	0.333333	3	SAUSA300_2610	histidinol-phosphate aminotransferase hisC	hisC	hisI-hisF-hisA-hisH-hisB-SAUSA300_2610-hisD-hisG-hisZ
NZ_LR130515_432123_C_T	0.134	0.0502	-0.737	0.0996	SAUSA300_0332	NZ_LR130515	432123	C	T	snp	missense_variant	EW033_RS02175		PTS sugar transporter subunit IIA	V120I	0.333333	3	SAUSA300_0332	PTS system, IIA component	SAUSA300_0332	ulaA-SAUSA300_0331-SAUSA300_0332-SAUSA300_0333
NZ_LR130515_432204_C_T	0.134	0.0502	-0.737	0.0996	SAUSA300_0332	NZ_LR130515	432204	C	T	snp	missense_variant	EW033_RS02175		PTS sugar transporter subunit IIA	D93N	0.333333	3	SAUSA300_0332	PTS system, IIA component	SAUSA300_0332	ulaA-SAUSA300_0331-SAUSA300_0332-SAUSA300_0333
NZ_LR130515_247385_GA_AT	0.292	0.0503	-0.372	0.0996		NZ_LR130515	247385	GA	AT	complex	missense_variant	EW033_RS00100				0.047619	21
NZ_LR130515_1226038_ACAATCAGTGAAAA_CCAACCAGTAAAAG	0.0388	0.0505	-0.592	0.0995	sdhB	NZ_LR130515	1226038	ACAATCAGTGAAAA	CCAACCAGTAAAAG	complex	missense_variant	EW033_RS06395	sdhB	succinate dehydrogenase iron-sulfur subunit	EQSVKN3DQPVKD	0.333333	3	SAUSA300_1048	succinate dehydrogenase iron-sulfur subunit	sdhB	sdhC-sdhA-sdhB
NZ_LR130515_1305460_A_G	0.313	0.0505	0.324	0.0995	fakA	NZ_LR130515	1305460	A	G	snp	missense_variant	EW033_RS06820		DAK2 domain-containing protein	I407V	0.166667	6	SAUSA300_1119	hypothetical protein	SAUSA300_1119	SAUSA300_1118-fakA
NZ_LR130515_1546390_T_C	0.68	0.0505	0.321	0.0995	ebh	NZ_LR130515	1546390	T	C	snp	missense_variant	EW033_RS07955	ebh	hyperosmolarity resistance protein Ebh	T6362A	0.2	5	SAUSA300_1327	cell surface protein	SAUSA300_1327
NZ_LR130515_863963_T_C	0.313	0.0508	0.575	0.0994	EW033_RS04475	NZ_LR130515	863963	T	C	snp	missense_variant	EW033_RS04475		hypothetical protein	F27L	0.125	8
NZ_LR130515_2860011_C_T	0.382	0.0508	0.763	0.0994	crtQ	NZ_LR130515	2860011	C	T	snp	missense_variant	EW033_RS15170		glycosyltransferase family 2 protein	A279T	0.2	5	SAUSA300_2500	glycosyl transferase	SAUSA300_2500	crtN-crtM-crtQ-crtP-crtO
NZ_LR130515_2901248_T_C	0.382	0.0508	0.763	0.0994		NZ_LR130515	2901248	T	C	snp	missense_variant	EW033_RS15395-EW033_RS15400				0.25	4
NZ_LR130515_284470_AC_GT	0.46	0.051	0.754	0.0993	opp-5A	NZ_LR130515	284470	AC	GT	mnp	missense_variant	EW033_RS01305		ABC transporter substrate-binding protein	S117N	0.25	4	SAUSA300_0231	ABC transporter substrate-binding protein	SAUSA300_0231
NZ_LR130515_2848304_C_G	0.196	0.0512	-0.588	0.0992	EW033_RS15120	NZ_LR130515	2848304	C	G	snp	missense_variant	EW033_RS15120		hypothetical protein	G10A	0.142857	7
NZ_LR130515_2985999_T_C	0.367	0.0515	0.576	0.0991	sasA	NZ_LR130515	2985999	T	C	snp	missense_variant	EW033_RS15780	sasA	serine-rich repeat glycoprotein adhesin SasA	N1311D	0.125	8	SAUSA300_2589	cell wall anchor domain-containing protein	SAUSA300_2589
NZ_LR130515_301224_CA_TG	0.302	0.0518	0.563	0.099	tarL'	NZ_LR130515	301224	CA	TG	complex	missense_variant	EW033_RS01405		CDP-glycerol glycerophosphotransferase family protein	A123V	0.166667	6	SAUSA300_0247	putative teichoic acid biosynthesis protein B	SAUSA300_0247	tarI'-tarJ'-tarL'
NZ_LR130515_1951430_T_C	0.594	0.0519	0.687	0.0989	SAUSA300_1738	NZ_LR130515	1951430	T	C	snp	missense_variant	EW033_RS09915		DUF4909 domain-containing protein	S17G	0.25	4	SAUSA300_1738	putative lipoprotein	SAUSA300_1738
NZ_LR130515_2850204_CTTCT_TTTCG	0.444	0.0519	0.645	0.0989	SAUSA300_2492	NZ_LR130515	2850204	CTTCT	TTTCG	complex	missense_variant	EW033_RS15130		sugar O-acetyltransferase	A192T	0.2	5	SAUSA300_2492	acetyltransferase family protein	SAUSA300_2492
NZ_LR130515_3005140_A_G	0.062	0.0519	-0.567	0.0989		NZ_LR130515	3005140	A	G	snp	missense_variant	EW033_RS15870-EW033_RS15875				0.1	10
NZ_LR130515_180035_ACAGAA_TCTGAG	0.478	0.052	0.695	0.0989	capB	NZ_LR130515	180035	ACAGAA	TCTGAG	complex	missense_variant	EW033_RS00900		tyrosine-protein kinase	T132S	0.25	4	SAUSA300_0153	capsular polysaccharide biosynthesis protein Cap5B	cap5B	capA-capB-capC-capD-capE-capF-capG-capH-capI-capJ-capK-capL-capM-capN-capO-capP
NZ_LR130515_2979591_C_T	0.116	0.052	-0.754	0.0989	asp3	NZ_LR130515	2979591	C	T	snp	missense_variant	EW033_RS15760	asp3	accessory Sec system protein Asp3	G207E	0.1	10	SAUSA300_2585	hypothetical protein	SAUSA300_2585	gtfB-gtfA-secA2-asp3-asp2-asp1-secY2
NZ_LR130515_2989276_ATTGGCT_GTTGACC	0.331	0.052	0.657	0.0988	sasA	NZ_LR130515	2989276	ATTGGCT	GTTGACC	complex	missense_variant	EW033_RS15780	sasA	serine-rich repeat glycoprotein adhesin SasA	A217V	0.25	4	SAUSA300_2589	cell wall anchor domain-containing protein	SAUSA300_2589
NZ_LR130515_2989483_A_C	0.331	0.052	0.657	0.0988	sasA	NZ_LR130515	2989483	A	C	snp	missense_variant	EW033_RS15780	sasA	serine-rich repeat glycoprotein adhesin SasA	N149K	0.25	4	SAUSA300_2589	cell wall anchor domain-containing protein	SAUSA300_2589
NZ_LR130515_1490676_C_T	0.269	0.0521	0.405	0.0988		NZ_LR130515	1490676	C	T	snp	missense_variant	EW033_RS00100				0.0588235	17
NZ_LR130515_1937246_C_T	0.0853	0.0521	0.561	0.0988		NZ_LR130515	1937246	C	T	snp	missense_variant	EW033_RS00100				0.125	8
NZ_LR130515_933322_T_C	0.351	0.0525	0.518	0.0986		NZ_LR130515	933322	T	C	snp	missense_variant	EW033_RS00100				0.111111	9
NZ_LR130515_2997602_T_C	0.556	0.0525	0.596	0.0987		NZ_LR130515	2997602	T	C	snp	missense_variant	EW033_RS15835-EW033_RS15840				0.166667	6
NZ_LR130515_298993_GC_AT	0.279	0.0526	0.568	0.0986		NZ_LR130515	298993	GC	AT	mnp	missense_variant	EW033_RS00100				0.25	4
NZ_LR130515_1266347_G_GA	0.654	0.0527	0.281	0.0986	SAUSA300_1085	NZ_LR130515	1266347	G	GA	ins	missense_variant	EW033_RS06640		RNA-binding protein	N215fs	0.0909091	11	SAUSA300_1085	hypothetical protein	SAUSA300_1085	SAUSA300_1081-SAUSA300_1082-sepF-SAUSA300_1084-SAUSA300_1085-SAUSA300_1086
NZ_LR130515_876081_G_A	0.793	0.0528	0.341	0.0985	sstD	NZ_LR130515	876081	G	A	snp	missense_variant	EW033_RS04545		siderophore ABC transporter substrate-binding protein	E311K	0.5	2	SAUSA300_0721	transferrin receptor	SAUSA300_0721	sstA-sstB-sstC-sstD
NZ_LR130515_241367_T_G	0.406	0.0531	0.775	0.0984	SAUSA300_0201	NZ_LR130515	241367	T	G	snp	missense_variant	EW033_RS01150		ABC transporter permease	I161M	0.333333	3	SAUSA300_0201	peptide ABC transporter permease	SAUSA300_0201	SAUSA300_0201-SAUSA300_0202-SAUSA300_0203-ggt
NZ_LR130515_317959_CAGAT_TAGAC	0.406	0.0531	0.775	0.0984	bglR	NZ_LR130515	317959	CAGAT	TAGAC	complex	missense_variant	EW033_RS01470		GntR family transcriptional regulator	A195T	0.25	4	SAUSA300_0258	GntR family transcriptional regulator	SAUSA300_0258
NZ_LR130515_2850854_A_C	0.556	0.0531	0.671	0.0984		NZ_LR130515	2850854	A	C	snp	missense_variant	EW033_RS15130-EW033_RS15135				0.25	4
NZ_LR130515_1180483_AT_GG	0.186	0.0534	0.836	0.0983		NZ_LR130515	1180483	AT	GG	complex	missense_variant	EW033_RS00100				0.25	4
NZ_LR130515_200223_G_C	0.142	0.0535	0.59	0.0982		NZ_LR130515	200223	G	C	snp	missense_variant	EW033_RS00100				0.166667	6
NZ_LR130515_1803805_A_ACATTTTCAG	0.137	0.0536	0.363	0.0982	tig	NZ_LR130515	1803805	A	ACATTTTCAG	ins	missense_variant	EW033_RS09240		trigger factor	A284_N286dup	0.5	2	SAUSA300_1622	trigger factor	tig	clpX-tig
NZ_LR130515_14001_G_A	0.0233	0.0538	-0.837	0.0981		NZ_LR130515	14001	G	A	snp	missense_variant	EW033_RS00050-EW033_RS00055				0.2	5
NZ_LR130515_2979769_T_C	0.525	0.0539	-0.677	0.0981	asp3	NZ_LR130515	2979769	T	C	snp	missense_variant	EW033_RS15760	asp3	accessory Sec system protein Asp3	N148D	0.333333	3	SAUSA300_2585	hypothetical protein	SAUSA300_2585	gtfB-gtfA-secA2-asp3-asp2-asp1-secY2
NZ_LR130515_2180357_G_A	0.155	0.0541	-0.696	0.098		NZ_LR130515	2180357	G	A	snp	missense_variant	EW033_RS00100				0.333333	3
NZ_LR130515_2935598_TCGTCTCA_ATAACTCT	0.333	0.0541	0.501	0.098	cysJ	NZ_LR130515	2935598	TCGTCTCA	ATAACTCT	complex	missense_variant	EW033_RS15580		assimilatory sulfite reductase (NADPH) flavoprotein subunit	TI610LL	0.111111	9	SAUSA300_2554	sulfite reductase flavoprotein	SAUSA300_2554
NZ_LR130515_260005_C_A	0.307	0.0543	0.543	0.0979		NZ_LR130515	260005	C	A	snp	missense_variant	EW033_RS00100				0.142857	7
NZ_LR130515_373050_G_A	0.284	0.0543	0.577	0.0979		NZ_LR130515	373050	G	A	snp	missense_variant	EW033_RS00100				0.2	5
NZ_LR130515_1118515_G_T	0.183	0.0543	0.659	0.0979	sspA	NZ_LR130515	1118515	G	T	snp	missense_variant	EW033_RS05850		Glu-specific serine endopeptidase SspA	H282N	0.142857	7	SAUSA300_0951	V8 protease	sspA	sspC-sspB-sspA
NZ_LR130515_1458510_C_T	0.0801	0.0544	-0.71	0.0979		NZ_LR130515	1458510	C	T	snp	missense_variant	EW033_RS00100				0.25	4
NZ_LR130515_179857_AACGTTAA_GACATTAG	0.403	0.0545	0.637	0.0978	capB	NZ_LR130515	179857	AACGTTAA	GACATTAG	complex	missense_variant	EW033_RS00900		tyrosine-protein kinase	I75V	0.333333	3	SAUSA300_0153	capsular polysaccharide biosynthesis protein Cap5B	cap5B	capA-capB-capC-capD-capE-capF-capG-capH-capI-capJ-capK-capL-capM-capN-capO-capP
NZ_LR130515_179992_T_A	0.403	0.0545	0.637	0.0978	capB	NZ_LR130515	179992	T	A	snp	missense_variant	EW033_RS00900		tyrosine-protein kinase	D117E	0.333333	3	SAUSA300_0153	capsular polysaccharide biosynthesis protein Cap5B	cap5B	capA-capB-capC-capD-capE-capF-capG-capH-capI-capJ-capK-capL-capM-capN-capO-capP
NZ_LR130515_1247930_G_A	0.0775	0.0545	-0.78	0.0978		NZ_LR130515	1247930	G	A	snp	missense_variant	EW033_RS00100				0.2	5
NZ_LR130515_2577519_TTACAACAAC_T	0.0465	0.0546	-0.641	0.0978	SAUSA300_2253	NZ_LR130515	2577519	TTACAACAAC	T	del	missense_variant	EW033_RS13720		CHAP domain-containing protein	N35_Y37del	0.333333	3	SAUSA300_2253	secretory antigen precursor SsaA	ssaA
NZ_LR130515_1300515_A_G	0.0904	0.0548	0.988	0.0977		NZ_LR130515	1300515	A	G	snp	missense_variant	EW033_RS00100				0.5	2
NZ_LR130515_1912020_CT_TC	0.287	0.0548	0.419	0.0977	sasC	NZ_LR130515	1912020	CT	TC	complex	missense_variant	EW033_RS09710	sasC	LPXTG-anchored repetitive surface protein SasC	S419D	0.0454545	22	SAUSA300_1702	cell wall surface anchor family protein	SAUSA300_1702
NZ_LR130515_2934990_AC_CT	0.264	0.0548	0.56	0.0977	SAUSA300_2553	NZ_LR130515	2934990	AC	CT	mnp	missense_variant	EW033_RS15575		NAD(P)-binding protein	L165V	0.25	4	SAUSA300_2553	precorrin-2 dehydrogenase	SAUSA300_2553
NZ_LR130515_13977_CAACTA_TAAACAC	0.0853	0.0551	-0.699	0.0976		NZ_LR130515	13977	CAACTA	TAAACAC	complex	missense_variant	EW033_RS00050-EW033_RS00055				0.2	5
NZ_LR130515_2899928_G_C	0.537	0.0551	0.458	0.0976		NZ_LR130515	2899928	G	C	snp	missense_variant	EW033_RS15380-EW033_RS15385				0.0769231	13
NZ_LR130515_3026529_TA_AG	0.0543	0.0551	-0.764	0.0976	SAUSA300_2627	NZ_LR130515	3026529	TA	AG	mnp	missense_variant	EW033_RS15980		anion permease	DT29EA	0.333333	3	SAUSA300_2627	2-oxoglutarate/malate translocator	SAUSA300_2627
NZ_LR130515_2431259_A_C	0.186	0.0553	0.929	0.0975	mtlF	NZ_LR130515	2431259	A	C	snp	missense_variant	EW033_RS12885		PTS mannitol transporter subunit IICB	N359T	0.333333	3	SAUSA300_2105	PTS system, mannitol specific IIBC component	mtlF	mtlF-mtlR-mtlA-mtlD
NZ_LR130515_1488674_T_C	0.163	0.0554	1.04	0.0974		NZ_LR130515	1488674	T	C	snp	missense_variant	EW033_RS00100				0.333333	3
NZ_LR130515_2087532_TTCCAT_CTCAGC	0.163	0.0554	1.04	0.0974	nadE	NZ_LR130515	2087532	TTCCAT	CTCAGC	complex	missense_variant	EW033_RS10855	nadE	ammonia-dependent NAD(+) synthetase	M25A	0.333333	3	SAUSA300_1893	NAD synthetase	nadE	nadE-pncB
NZ_LR130515_206214_A_T	0.499	0.0555	0.599	0.0974		NZ_LR130515	206214	A	T	snp	missense_variant	EW033_RS00100				0.166667	6
NZ_LR130515_435155_G_A	0.227	0.0555	-0.683	0.0974		NZ_LR130515	435155	G	A	snp	missense_variant	EW033_RS00100				0.2	5
NZ_LR130515_1552547_AAAT_GAAG	0.395	0.0555	0.525	0.0974	ebh	NZ_LR130515	1552547	AAAT	GAAG	complex	missense_variant	EW033_RS07955	ebh	hyperosmolarity resistance protein Ebh	K4308N	0.1	10	SAUSA300_1327	cell surface protein	SAUSA300_1327
NZ_LR130515_1952025_A_G	0.191	0.0555	-0.52	0.0974	SAUSA300_1739	NZ_LR130515	1952025	A	G	snp	missense_variant	EW033_RS09920		calcium-binding protein	N82S	0.25	4	SAUSA300_1739	hypothetical protein	SAUSA300_1739
NZ_LR130515_318606_G_A	0.227	0.0559	0.347	0.0973		NZ_LR130515	318606	G	A	snp	missense_variant	EW033_RS00100				0.333333	3
NZ_LR130515_2758224_AAA_TAC	0.103	0.056	0.843	0.0972		NZ_LR130515	2758224	AAA	TAC	complex	missense_variant	EW033_RS14665-EW033_RS14670				0.0833333	12
NZ_LR130515_3005560_T_C	0.336	0.0561	0.521	0.0972		NZ_LR130515	3005560	T	C	snp	missense_variant	EW033_RS15870-EW033_RS15875				0.2	5
NZ_LR130515_523792_A_T	0.217	0.0562	-0.725	0.0972		NZ_LR130515	523792	A	T	snp	missense_variant	EW033_RS00100				0.25	4
NZ_LR130515_3020522_TTC_AGT	0.137	0.0562	-0.538	0.0971	drp35	NZ_LR130515	3020522	TTC	AGT	complex	missense_variant	EW033_RS15955		SMP-30/gluconolactonase/LRE family protein	E132T	0.166667	6	SAUSA300_2621	hypothetical protein	SAUSA300_2621
NZ_LR130515_3048261_C_A	0.103	0.0562	-0.835	0.0972		NZ_LR130515	3048261	C	A	snp	missense_variant	EW033_RS16085-EW033_RS16090				0.25	4
NZ_LR130515_2932958_C_G	0.398	0.0563	0.617	0.0971		NZ_LR130515	2932958	C	G	snp	missense_variant	EW033_RS15560-EW033_RS15565				0.142857	7
NZ_LR130515_566766_A_AAT	0.176	0.0565	0.601	0.097		NZ_LR130515	566766	A	AAT	ins	missense_variant	EW033_RS00100				0.125	8
NZ_LR130515_1875624_A_T	0.0543	0.0565	0.58	0.097		NZ_LR130515	1875624	A	T	snp	missense_variant	EW033_RS00100				0.142857	7
NZ_LR130515_32568_G_C	0.253	0.0568	0.534	0.0969	adsA	NZ_LR130515	32568	G	C	snp	missense_variant	EW033_RS00135		LPXTG-anchored adenosine synthase AdsA	R704T	0.142857	7	SAUSA300_0025	5'-nucleotidase family protein	SAUSA300_0025
NZ_LR130515_978104_CG_TA	0.0724	0.0568	0.794	0.0969	EW033_RS05135	NZ_LR130515	978104	CG	TA	mnp	missense_variant	EW033_RS05135		hypothetical protein	A75V	0.2	5
NZ_LR130515_1687361_A_T	0.584	0.0569	0.538	0.0969	SAUSA300_1519	NZ_LR130515	1687361	A	T	snp	missense_variant	EW033_RS08615		Nif3-like dinuclear metal center hexameric protein	L351I	0.125	8	SAUSA300_1519	hypothetical protein	SAUSA300_1519	SAUSA300_1519-trmK
NZ_LR130515_2962260_T_G	0.3	0.057	0.529	0.0968	SAUSA300_2575	NZ_LR130515	2962260	T	G	snp	missense_variant	EW033_RS15710		BglG family transcription antiterminator	I468R	0.25	4	SAUSA300_2575	BglG family transcriptional antiterminator	SAUSA300_2575	SAUSA300_2575-manP-pmi
NZ_LR130515_2368631_AATTTG_CATGTTGCGTTA	0.129	0.0573	-0.775	0.0967	EW033_RS12545	NZ_LR130515	2368631	AATTTG	CATGTTGCGTTA	complex	missense_variant	EW033_RS12545		hypothetical protein	K36_A38delinsTCCVT	0.333333	3
NZ_LR130515_2368648_G_T	0.129	0.0573	-0.775	0.0967	EW033_RS12545	NZ_LR130515	2368648	G	T	snp	missense_variant	EW033_RS12545		hypothetical protein	A42S	0.333333	3
NZ_LR130515_2500234_T_C	0.261	0.0573	0.324	0.0967		NZ_LR130515	2500234	T	C	snp	missense_variant	EW033_RS13200-EW033_RS13205				0.2	5
NZ_LR130515_2986959_TG_CA	0.202	0.0573	-0.636	0.0967	sasA	NZ_LR130515	2986959	TG	CA	complex	missense_variant	EW033_RS15780	sasA	serine-rich repeat glycoprotein adhesin SasA	I991V	0.166667	6	SAUSA300_2589	cell wall anchor domain-containing protein	SAUSA300_2589
NZ_LR130515_2808593_A_G	0.654	0.0575	0.718	0.0967	mhqE	NZ_LR130515	2808593	A	G	snp	missense_variant	EW033_RS14910		alpha/beta hydrolase	L117P	0.333333	3	SAUSA300_2457	phospholipase/carboxylesterase family protein	SAUSA300_2457	mhqE-mhqD
NZ_LR130515_1202751_C_T	0.0646	0.0576	-0.694	0.0966	isdB	NZ_LR130515	1202751	C	T	snp	missense_variant	EW033_RS06280	isdB	heme uptake protein IsdB	A115T	0.25	4	SAUSA300_1028	iron transport associated domain-containing protein	SAUSA300_1028
NZ_LR130515_2069878_TATTTTTTAAATCT_CATTGTTATATCA	0.163	0.0577	0.828	0.0966		NZ_LR130515	2069878	TATTTTTTAAATCT	CATTGTTATATCA	complex	missense_variant	EW033_RS00100				0.2	5
NZ_LR130515_2767212_CCAAG_TCAAA	0.0336	0.0577	0.844	0.0966	SAUSA300_2424	NZ_LR130515	2767212	CCAAG	TCAAA	complex	missense_variant	EW033_RS14725		tandem-type lipoprotein	V14I	0.25	4	SAUSA300_2424	putative tandem lipoprotein	SAUSA300_2424
NZ_LR130515_3049296_T_C	0.566	0.0579	0.655	0.0965		NZ_LR130515	3049296	T	C	snp	missense_variant	EW033_RS16095-CHR_END				0.25	4
NZ_LR130515_2700759_T_C	0.419	0.058	0.428	0.0964		NZ_LR130515	2700759	T	C	snp	missense_variant	EW033_RS14370-EW033_RS14375				0.0666667	15
NZ_LR130515_2986339_AT_CG	0.0362	0.058	-0.56	0.0964	sasA	NZ_LR130515	2986339	AT	CG	complex	missense_variant	EW033_RS15780	sasA	serine-rich repeat glycoprotein adhesin SasA	N1197T	0.25	4	SAUSA300_2589	cell wall anchor domain-containing protein	SAUSA300_2589
NZ_LR130515_280816_C_T	0.77	0.0581	0.302	0.0964		NZ_LR130515	280816	C	T	snp	missense_variant	EW033_RS00100				0.125	8
NZ_LR130515_2109177_G_A	0.0103	0.0584	-0.846	0.0963		NZ_LR130515	2109177	G	A	snp	missense_variant	EW033_RS00100				0.5	2
NZ_LR130515_3028264_AATTAT_TAAGTGC	0.245	0.0584	-0.424	0.0963		NZ_LR130515	3028264	AATTAT	TAAGTGC	complex	missense_variant	EW033_RS15980-EW033_RS15985				0.0357143	28
NZ_LR130515_1409474_C_T	0.031	0.0585	0.759	0.0963		NZ_LR130515	1409474	C	T	snp	missense_variant	EW033_RS00100				0.333333	3
NZ_LR130515_547828_G_A	0.031	0.0586	0.681	0.0962	SAUSA300_0421	NZ_LR130515	547828	G	A	snp	missense_variant	EW033_RS02825		hypothetical protein	E99K	0.142857	7	SAUSA300_0421	hypothetical protein	SAUSA300_0421	lpl9-SAUSA300_0420-SAUSA300_0421-SAUSA300_0422
NZ_LR130515_123213_TCAA_CCGT	0.0233	0.0587	-0.843	0.0962	SAUSA300_0104	NZ_LR130515	123213	TCAA	CCGT	complex	missense_variant	EW033_RS00655		helix-turn-helix domain-containing protein	Q330R	0.333333	3	SAUSA300_0104	AraC family transcriptional regulator	SAUSA300_0104
NZ_LR130515_1465885_C_T	0.101	0.0587	-0.873	0.0962	tyrA	NZ_LR130515	1465885	C	T	snp	missense_variant	EW033_RS07585		prephenate dehydrogenase	E80K	0.333333	3	SAUSA300_1260	prephenate dehydrogenase	SAUSA300_1260
NZ_LR130515_1285019_T_A	0.196	0.0588	0.88	0.0962		NZ_LR130515	1285019	T	A	snp	missense_variant	EW033_RS00100				0.333333	3
NZ_LR130515_949850_T_G	0.0775	0.0589	-0.883	0.0961		NZ_LR130515	949850	T	G	snp	missense_variant	EW033_RS00100				0.25	4
NZ_LR130515_1591683_G_T	0.0775	0.059	-0.773	0.0961	birA	NZ_LR130515	1591683	G	T	snp	missense_variant	EW033_RS08070		biotin--[acetyl-CoA-carboxylase] ligase	H234N	0.25	4	SAUSA300_1347	BirA bifunctional protein	birA	dinG-birA-papS-bshA
NZ_LR130515_2923795_C_A	0.483	0.0591	0.731	0.096		NZ_LR130515	2923795	C	A	snp	missense_variant	EW033_RS15515-EW033_RS15520				0.5	2
NZ_LR130515_218007_G_A	0.16	0.0592	0.577	0.096		NZ_LR130515	218007	G	A	snp	missense_variant	EW033_RS00100				0.333333	3
NZ_LR130515_329478_C_T	0.16	0.0592	0.577	0.096		NZ_LR130515	329478	C	T	snp	missense_variant	EW033_RS00100				0.25	4
NZ_LR130515_329495_T_C	0.16	0.0592	0.577	0.096		NZ_LR130515	329495	T	C	snp	missense_variant	EW033_RS00100				0.333333	3
NZ_LR130515_2958342_G_A	0.385	0.0592	0.715	0.096	aur	NZ_LR130515	2958342	G	A	snp	missense_variant	EW033_RS15695	aur	zinc metalloproteinase aureolysin	T203M	0.2	5	SAUSA300_2572	zinc metalloproteinase aureolysin	aur
NZ_LR130515_3029182_A_G	0.385	0.0592	0.715	0.096	rarD	NZ_LR130515	3029182	A	G	snp	missense_variant	EW033_RS15985	rarD	EamA family transporter RarD	V46A	0.2	5	SAUSA300_2628	RarD protein	rarD
NZ_LR130515_127178_T_A	0.406	0.0594	0.62	0.0959		NZ_LR130515	127178	T	A	snp	missense_variant	EW033_RS00100				0.333333	3
NZ_LR130515_256634_G_T	0.152	0.0597	0.576	0.0958	SAUSA300_0214	NZ_LR130515	256634	G	T	snp	missense_variant	EW033_RS01210		sugar phosphate isomerase/epimerase	A23S	0.25	4	SAUSA300_0214	hypothetical protein	SAUSA300_0214	SAUSA300_0212-SAUSA300_0213-SAUSA300_0214
NZ_LR130515_2030067_G_A	0.0129	0.0597	-0.854	0.0958		NZ_LR130515	2030067	G	A	snp	missense_variant	EW033_RS00100				0.5	2
NZ_LR130515_2313911_AAT_GAC	0.0129	0.0597	-0.854	0.0958	SAUSA300_1998	NZ_LR130515	2313911	AAT	GAC	complex	missense_variant	EW033_RS12265		YeeE/YedE family protein	I60V	0.5	2	SAUSA300_1998	hypothetical protein	SAUSA300_1998	SAUSA300_1997-SAUSA300_1998
NZ_LR130515_2992590_A_G	0.377	0.0598	0.775	0.0958	EW033_RS15800	NZ_LR130515	2992590	A	G	snp	missense_variant	EW033_RS15800		hypothetical protein	H60R	0.333333	3
NZ_LR130515_2992765_G_A	0.377	0.0598	0.775	0.0958		NZ_LR130515	2992765	G	A	snp	missense_variant	EW033_RS15800-EW033_RS15805				0.333333	3
NZ_LR130515_877992_AATA_GATC	0.101	0.0599	-0.563	0.0957	SAUSA300_0723	NZ_LR130515	877992	AATA	GATC	complex	missense_variant	EW033_RS04560		GrpB family protein	D134E	0.5	2	SAUSA300_0723	hypothetical protein	SAUSA300_0723
NZ_LR130515_2904851_T_C	0.501	0.0599	0.437	0.0957		NZ_LR130515	2904851	T	C	snp	missense_variant	EW033_RS15415-EW033_RS15420				0.0714286	14
NZ_LR130515_176133_A_G	0.548	0.06	0.479	0.0957	adhE	NZ_LR130515	176133	A	G	snp	missense_variant	EW033_RS00890	adhE	bifunctional acetaldehyde-CoA/alcohol dehydrogenase	N44D	0.125	8	SAUSA300_0151	bifunctional acetaldehyde-CoA/alcohol dehydrogenase	adhE
NZ_LR130515_176916_A_G	0.548	0.06	0.479	0.0957	adhE	NZ_LR130515	176916	A	G	snp	missense_variant	EW033_RS00890	adhE	bifunctional acetaldehyde-CoA/alcohol dehydrogenase	S305G	0.125	8	SAUSA300_0151	bifunctional acetaldehyde-CoA/alcohol dehydrogenase	adhE
NZ_LR130515_1010259_C_A	0.202	0.06	0.52	0.0957		NZ_LR130515	1010259	C	A	snp	missense_variant	EW033_RS00100				0.111111	9
NZ_LR130515_2986929_A_T	0.204	0.06	-0.655	0.0957	sasA	NZ_LR130515	2986929	A	T	snp	missense_variant	EW033_RS15780	sasA	serine-rich repeat glycoprotein adhesin SasA	S1001T	0.2	5	SAUSA300_2589	cell wall anchor domain-containing protein	SAUSA300_2589
NZ_LR130515_1952298_C_A	0.168	0.0601	-0.588	0.0957	SAUSA300_1739	NZ_LR130515	1952298	C	A	snp	missense_variant	EW033_RS09920		calcium-binding protein	T173K	0.2	5	SAUSA300_1739	hypothetical protein	SAUSA300_1739
NZ_LR130515_28146_TCCG_CTCA	0.411	0.0605	-0.547	0.0955	walH	NZ_LR130515	28146	TCCG	CTCA	complex	missense_variant	EW033_RS00120		hypothetical protein	P410S	0.166667	6	SAUSA300_0022	hypothetical protein	SAUSA300_0022	walR-walK-walH-walI
NZ_LR130515_804139_A_T	0.227	0.0606	-0.47	0.0955	rbf	NZ_LR130515	804139	A	T	snp	missense_variant	EW033_RS04165		helix-turn-helix transcriptional regulator	E283D	0.0769231	13	SAUSA300_0653	AraC family transcriptional regulator	SAUSA300_0653
NZ_LR130515_2570612_A_T	0.481	0.0606	0.518	0.0955	SAUSA300_2248	NZ_LR130515	2570612	A	T	snp	missense_variant	EW033_RS13690		helix-turn-helix transcriptional regulator	S494T	0.142857	7	SAUSA300_2248	AraC family transcriptional regulator	SAUSA300_2248	SAUSA300_2246-sarY-SAUSA300_2248
NZ_LR130515_2987523_GGCTTAC_AACTTGT	0.0258	0.0606	-0.855	0.0955	sasA	NZ_LR130515	2987523	GGCTTAC	AACTTGT	complex	missense_variant	EW033_RS15780	sasA	serine-rich repeat glycoprotein adhesin SasA	V801T	0.333333	3	SAUSA300_2589	cell wall anchor domain-containing protein	SAUSA300_2589
NZ_LR130515_2987552_G_A	0.0258	0.0606	-0.855	0.0955	sasA	NZ_LR130515	2987552	G	A	snp	missense_variant	EW033_RS15780	sasA	serine-rich repeat glycoprotein adhesin SasA	A793V	0.333333	3	SAUSA300_2589	cell wall anchor domain-containing protein	SAUSA300_2589
NZ_LR130515_3009956_T_G	0.0258	0.0606	-0.855	0.0955	SAUSA300_2610	NZ_LR130515	3009956	T	G	snp	missense_variant	EW033_RS15900		histidinol-phosphate aminotransferase family protein	E41D	0.5	2	SAUSA300_2610	histidinol-phosphate aminotransferase hisC	hisC	hisI-hisF-hisA-hisH-hisB-SAUSA300_2610-hisD-hisG-hisZ
NZ_LR130515_3022062_GTAAT_ATAAC	0.0258	0.0606	-0.855	0.0955	SAUSA300_2622	NZ_LR130515	3022062	GTAAT	ATAAC	complex	missense_variant	EW033_RS15960		rhodanese-related sulfurtransferase	G301D	0.5	2	SAUSA300_2622	hypothetical protein	SAUSA300_2622
NZ_LR130515_3022078_A_T	0.0258	0.0606	-0.855	0.0955	SAUSA300_2622	NZ_LR130515	3022078	A	T	snp	missense_variant	EW033_RS15960		rhodanese-related sulfurtransferase	Q306H	0.333333	3	SAUSA300_2622	hypothetical protein	SAUSA300_2622
NZ_LR130515_2989174_AC_GG	0.31	0.0607	0.563	0.0954	sasA	NZ_LR130515	2989174	AC	GG	complex	missense_variant	EW033_RS15780	sasA	serine-rich repeat glycoprotein adhesin SasA	S252T	0.2	5	SAUSA300_2589	cell wall anchor domain-containing protein	SAUSA300_2589
NZ_LR130515_1555767_G_A	0.0155	0.0608	-1.14	0.0954	ebh	NZ_LR130515	1555767	G	A	snp	missense_variant	EW033_RS07955	ebh	hyperosmolarity resistance protein Ebh	A3236V	0.5	2	SAUSA300_1327	cell surface protein	SAUSA300_1327
NZ_LR130515_1584694_T_C	0.16	0.0608	-0.641	0.0954		NZ_LR130515	1584694	T	C	snp	missense_variant	EW033_RS00100				0.142857	7
NZ_LR130515_2496407_A_C	0.031	0.0608	0.641	0.0954	hysA	NZ_LR130515	2496407	A	C	snp	missense_variant	EW033_RS13190	hysA	hyaluronate lyase HysA	K271T	0.5	2	SAUSA300_2161	hyaluronate lyase	hysA
NZ_LR130515_2496422_TTCAAG_CGCAAA	0.031	0.0608	0.641	0.0954	hysA	NZ_LR130515	2496422	TTCAAG	CGCAAA	complex	missense_variant	EW033_RS13190	hysA	hyaluronate lyase HysA	VQD276AQN	0.5	2	SAUSA300_2161	hyaluronate lyase	hysA
NZ_LR130515_176547_T_A	0.442	0.0611	0.276	0.0953	adhE	NZ_LR130515	176547	T	A	snp	missense_variant	EW033_RS00890	adhE	bifunctional acetaldehyde-CoA/alcohol dehydrogenase	F182I	0.0833333	12	SAUSA300_0151	bifunctional acetaldehyde-CoA/alcohol dehydrogenase	adhE
NZ_LR130515_1614384_CTCCAA_TTCTAT	0.0724	0.0614	-0.743	0.0952		NZ_LR130515	1614384	CTCCAA	TTCTAT	complex	missense_variant	EW033_RS00100				0.0526316	19
NZ_LR130515_272502_A_G	0.14	0.0618	-0.733	0.095		NZ_LR130515	272502	A	G	snp	missense_variant	EW033_RS00100				0.333333	3
NZ_LR130515_143588_G_A	0.101	0.0619	-1.09	0.095	sbnC	NZ_LR130515	143588	G	A	snp	missense_variant	EW033_RS00730	sbnC	staphyloferrin B biosynthesis protein SbnC	D378N	0.5	2	SAUSA300_0120	IucC family siderophore biosynthesis protein	sbnC	sbnA-sbnB-sbnC-sbnD-sbnE-sbnF-sbnG-sbnH-sbnI
NZ_LR130515_339931_A_G	0.101	0.0619	-1.09	0.095	esaA	NZ_LR130515	339931	A	G	snp	missense_variant	EW033_RS01575	esaA	type VII secretion protein EsaA	I1000V	0.5	2	SAUSA300_0279	hypothetical protein	SAUSA300_0279	esaA-essA-esaB-essB-essC-esxC-esxB-esaE-esxD-esaD-esaG
NZ_LR130515_448624_AAC_GAT	0.101	0.0619	-1.09	0.095	SAUSA300_0349	NZ_LR130515	448624	AAC	GAT	complex	missense_variant	EW033_RS02265		DUF1398 family protein	V122I	0.333333	3	SAUSA300_0349	hypothetical protein	SAUSA300_0349
NZ_LR130515_523821_ACAAT_CTAAATCACCCAAA	0.101	0.0619	-1.09	0.095		NZ_LR130515	523821	ACAAT	CTAAATCACCCAAA	complex	missense_variant	EW033_RS00100				0.0769231	13
NZ_LR130515_627798_T_C	0.101	0.0619	-1.09	0.095		NZ_LR130515	627798	T	C	snp	missense_variant	EW033_RS00100				0.5	2
NZ_LR130515_907360_G_C	0.101	0.0619	-1.09	0.095	SAUSA300_0746	NZ_LR130515	907360	G	C	snp	missense_variant	EW033_RS04690		tetratricopeptide repeat protein	K456N	0.5	2	SAUSA300_0746	TPR domain-containing protein	SAUSA300_0746	hprK-lgt-SAUSA300_0745-SAUSA300_0746-trxB
NZ_LR130515_1228469_AAAA_CAAC	0.101	0.0619	-1.09	0.095	SAUSA300_1050	NZ_LR130515	1228469	AAAA	CAAC	complex	missense_variant	EW033_RS06405		XTP/dITP diphosphatase	KN193QH	0.333333	3	SAUSA300_1050	nucleoside-triphosphatase	SAUSA300_1050	murI-SAUSA300_1050-SAUSA300_1051
NZ_LR130515_1502195_G_A	0.101	0.0619	-1.09	0.095	lysA	NZ_LR130515	1502195	G	A	snp	missense_variant	EW033_RS07760	lysA	diaminopimelate decarboxylase	E337K	0.5	2	SAUSA300_1293	diaminopimelate decarboxylase	lysA	dapI-alr2-lysA
NZ_LR130515_1553388_T_C	0.101	0.0619	-1.09	0.095	ebh	NZ_LR130515	1553388	T	C	snp	missense_variant	EW033_RS07955	ebh	hyperosmolarity resistance protein Ebh	H4029R	0.5	2	SAUSA300_1327	cell surface protein	SAUSA300_1327
NZ_LR130515_1908260_ATTT_GTTA	0.101	0.0619	-1.09	0.095	sasC	NZ_LR130515	1908260	ATTT	GTTA	complex	missense_variant	EW033_RS09710	sasC	LPXTG-anchored repetitive surface protein SasC	K1671N	0.5	2	SAUSA300_1702	cell wall surface anchor family protein	SAUSA300_1702
NZ_LR130515_2180402_CCA_TCT	0.101	0.0619	-1.09	0.095		NZ_LR130515	2180402	CCA	TCT	complex	missense_variant	EW033_RS00100				0.5	2
NZ_LR130515_2367368_C_A	0.101	0.0619	-1.09	0.095	cls2	NZ_LR130515	2367368	C	A	snp	missense_variant	EW033_RS12525	cls	cardiolipin synthase	A471E	0.5	2	SAUSA300_2044	cardiolipin synthetase	cls	cls2-SAUSA300_2045
NZ_LR130515_2747064_G_A	0.101	0.0619	-1.09	0.095	SAUSA300_2404	NZ_LR130515	2747064	G	A	snp	missense_variant	EW033_RS14615		FMN-binding glutamate synthase family protein	H172Y	0.5	2	SAUSA300_2404	hypothetical protein	SAUSA300_2404
NZ_LR130515_2816808_C_T	0.101	0.0619	-1.09	0.095		NZ_LR130515	2816808	C	T	snp	missense_variant	EW033_RS14955-EW033_RS14960				0.166667	6
NZ_LR130515_2858705_ATTAT_GTTAG	0.101	0.0619	-1.09	0.095	crtN	NZ_LR130515	2858705	ATTAT	GTTAG	complex	missense_variant	EW033_RS15160	crtI	phytoene desaturase	N33T	0.5	2	SAUSA300_2498	squalene synthase	crtN	crtN-crtM-crtQ-crtP-crtO
NZ_LR130515_2872888_T_C	0.101	0.0619	-1.09	0.095		NZ_LR130515	2872888	T	C	snp	missense_variant	EW033_RS15235-EW033_RS15240				0.5	2
NZ_LR130515_2992573_GT_AC	0.302	0.062	0.532	0.0949	EW033_RS15800	NZ_LR130515	2992573	GT	AC	mnp	missense_variant	EW033_RS15800		hypothetical protein	M54I	0.166667	6
NZ_LR130515_867579_A_G	0.22	0.0621	-0.439	0.0949		NZ_LR130515	867579	A	G	snp	missense_variant	EW033_RS00100				0.142857	7
NZ_LR130515_941859_AT_A	0.199	0.0623	0.48	0.0948		NZ_LR130515	941859	AT	A	del	missense_variant	EW033_RS00100				0.2	5
NZ_LR130515_2497451_AAAA_GAAC	0.222	0.0624	0.605	0.0948	hysA	NZ_LR130515	2497451	AAAA	GAAC	complex	missense_variant	EW033_RS13190	hysA	hyaluronate lyase HysA	EN619GT	0.166667	6	SAUSA300_2161	hyaluronate lyase	hysA
NZ_LR130515_2946962_ATCAC_A	0.0543	0.0627	-0.721	0.0947		NZ_LR130515	2946962	ATCAC	A	del	missense_variant	EW033_RS15645-EW033_RS15650				0.333333	3
NZ_LR130515_639794_A_G	0.16	0.0628	-0.56	0.0947		NZ_LR130515	639794	A	G	snp	missense_variant	EW033_RS00100				0.142857	7
NZ_LR130515_2743064_T_C	0.238	0.0628	0.413	0.0947	SAUSA300_2400	NZ_LR130515	2743064	T	C	snp	missense_variant	EW033_RS14590		M42 family metallopeptidase	Ter359Ter	0.0625	16	SAUSA300_2400	glutamyl-aminopeptidase	SAUSA300_2400
NZ_LR130515_1010331_A_G	0.202	0.063	0.516	0.0946		NZ_LR130515	1010331	A	G	snp	missense_variant	EW033_RS00100				0.111111	9
NZ_LR130515_2358491_TAAGA_CAAGC	0.137	0.063	0.513	0.0946		NZ_LR130515	2358491	TAAGA	CAAGC	complex	missense_variant	EW033_RS00100				0.0555556	18
NZ_LR130515_129609_GTTT_TGCC	0.225	0.0631	-0.405	0.0946		NZ_LR130515	129609	GTTT	TGCC	mnp	missense_variant	EW033_RS00100				0.0714286	14
NZ_LR130515_2546651_C_T	0.0801	0.0632	0.735	0.0945		NZ_LR130515	2546651	C	T	snp	missense_variant	EW033_RS13520-EW033_RS13540				0.25	4
NZ_LR130515_2572958_T_TAACTAC	0.204	0.0635	0.446	0.0944	ssaA	NZ_LR130515	2572958	T	TAACTAC	ins	missense_variant	EW033_RS13695		CHAP domain-containing protein	Y86_N87dup	0.0769231	13	SAUSA300_2249	secretory antigen precursor SsaA	ssaA
NZ_LR130515_2847474_A_C	0.545	0.0636	0.695	0.0944		NZ_LR130515	2847474	A	C	snp	missense_variant	EW033_RS15110-EW033_RS15115				0.333333	3
NZ_LR130515_2902165_T_A	0.269	0.0638	0.512	0.0943		NZ_LR130515	2902165	T	A	snp	missense_variant	EW033_RS15400-EW033_RS15405				0.166667	6
NZ_LR130515_2185498_TTTTT_GTTTC	0.0284	0.0639	-0.614	0.0943		NZ_LR130515	2185498	TTTTT	GTTTC	complex	missense_variant	EW033_RS00100				0.0181818	55
NZ_LR130515_2712953_C_CA	0.0543	0.0639	-0.546	0.0943		NZ_LR130515	2712953	C	CA	ins	missense_variant	EW033_RS14430-EW033_RS14440				0.0833333	12
NZ_LR130515_2982748_CAAATC_AAAGTT	0.0543	0.0639	-0.694	0.0943	asp1	NZ_LR130515	2982748	CAAATC	AAAGTT	complex	missense_variant	EW033_RS15770	asp1	accessory Sec system protein Asp1	DL183NF	0.25	4	SAUSA300_2587	accessory secretory protein Asp1	SAUSA300_2587	gtfB-gtfA-secA2-asp3-asp2-asp1-secY2
NZ_LR130515_938483_C_T	0.233	0.064	0.581	0.0942	emp	NZ_LR130515	938483	C	T	snp	missense_variant	EW033_RS04845	emp	extracellular matrix protein-binding adhesin Emp	A81V	0.2	5	SAUSA300_0774	secretory extracellular matrix and plasma binding protein	empbp
NZ_LR130515_940243_AGG_CGA	0.0801	0.064	0.921	0.0943		NZ_LR130515	940243	AGG	CGA	complex	missense_variant	EW033_RS00100				0.333333	3
NZ_LR130515_1154952_CGACTTA_TGACAAG	0.0801	0.064	0.921	0.0943		NZ_LR130515	1154952	CGACTTA	TGACAAG	complex	missense_variant	EW033_RS00100				0.142857	7
NZ_LR130515_838368_G_A	0.0646	0.0642	0.734	0.0942		NZ_LR130515	838368	G	A	snp	missense_variant	EW033_RS00100				0.25	4
NZ_LR130515_1260369_AT_A	0.264	0.0642	0.327	0.0942		NZ_LR130515	1260369	AT	A	del	missense_variant	EW033_RS00100				0.25	4
NZ_LR130515_372154_T_G	0.292	0.0643	0.572	0.0942		NZ_LR130515	372154	T	G	snp	missense_variant	EW033_RS00100				0.333333	3
NZ_LR130515_2067449_G_A	0.0724	0.0643	-0.661	0.0941	rumA	NZ_LR130515	2067449	G	A	snp	missense_variant	EW033_RS10760	rlmD	23S rRNA (uracil(1939)-C(5))-methyltransferase RlmD	P223S	0.25	4	SAUSA300_1878	RNA methyltransferase	rumA	rumA-dgkB
NZ_LR130515_1047255_A_T	0.264	0.0644	-0.357	0.0941		NZ_LR130515	1047255	A	T	snp	missense_variant	EW033_RS00100				0.0454545	22
NZ_LR130515_2700768_GA_AC	0.132	0.0644	0.466	0.0941		NZ_LR130515	2700768	GA	AC	complex	missense_variant	EW033_RS14370-EW033_RS14375				0.1	10
NZ_LR130515_3030123_AATTA_TAATC	0.0413	0.0648	0.496	0.094		NZ_LR130515	3030123	AATTA	TAATC	complex	missense_variant	EW033_RS15990-EW033_RS15995				0.1	10
NZ_LR130515_1811903_G_A	0.0853	0.0649	0.819	0.0939		NZ_LR130515	1811903	G	A	snp	missense_variant	EW033_RS00100				0.0833333	12
NZ_LR130515_146579_CC_TG	0.307	0.0651	0.504	0.0939	sbnE	NZ_LR130515	146579	CC	TG	mnp	missense_variant	EW033_RS00740	sbnE	L-2,3-diaminopropanoate--citrate ligase SbnE	T377M	0.2	5	SAUSA300_0122	IucA/IucC family siderophore biosynthesis protein	SAUSA300_0122	sbnA-sbnB-sbnC-sbnD-sbnE-sbnF-sbnG-sbnH-sbnI
NZ_LR130515_223530_T_A	0.15	0.0653	-0.632	0.0938	brnQ1	NZ_LR130515	223530	T	A	snp	missense_variant	EW033_RS01085	brnQ	branched-chain amino acid transport system II carrier protein	Y441F	0.2	5	SAUSA300_0188	branched-chain amino acid transport system II carrier protein	brnQ
NZ_LR130515_1535374_GATCAGTACGAGCTTTG_AATCCTTACTAGCATTA	0.163	0.0655	0.554	0.0937	ebh	NZ_LR130515	1535374	GATCAGTACGAGCTTTG	AATCCTTACTAGCATTA	complex	missense_variant	EW033_RS07955	ebh	hyperosmolarity resistance protein Ebh	KART10029NASK	0.0714286	14	SAUSA300_1327	cell surface protein	SAUSA300_1327
NZ_LR130515_119908_A_G	0.248	0.0658	0.518	0.0936	SAUSA300_0098	NZ_LR130515	119908	A	G	snp	missense_variant	EW033_RS00640		hypothetical protein	K160R	0.166667	6	SAUSA300_0098	hypothetical protein	SAUSA300_0098
NZ_LR130515_2973782_A_C	0.455	0.066	0.731	0.0936		NZ_LR130515	2973782	A	C	snp	missense_variant	EW033_RS15740-EW033_RS15745				0.333333	3
NZ_LR130515_649038_T_C	0.129	0.0661	0.661	0.0935		NZ_LR130515	649038	T	C	snp	missense_variant	EW033_RS00100				0.111111	9
NZ_LR130515_2913465_AT_A	0.0103	0.0665	0.815	0.0934		NZ_LR130515	2913465	AT	A	del	missense_variant	EW033_RS15465-EW033_RS15475				0.333333	3
NZ_LR130515_1310007_GAACACA_AAAGACG	0.238	0.0666	0.581	0.0934	fabD	NZ_LR130515	1310007	GAACACA	AAAGACG	complex	missense_variant	EW033_RS06840	fabD	ACP S-malonyltransferase	N38K	0.333333	3	SAUSA300_1123	malonyl CoA-acyl carrier protein transacylase	fabD	fapR-plsX-fabD-fabG
NZ_LR130515_272531_TCTG_ATTGCTTCAACCCGCTTCAA	0.0155	0.0668	0.787	0.0933		NZ_LR130515	272531	TCTG	ATTGCTTCAACCCGCTTCAA	complex	missense_variant	EW033_RS00100				0.142857	7
NZ_LR130515_2906989_AACG_TCCT	0.137	0.0668	0.656	0.0933	SAUSA300_2531	NZ_LR130515	2906989	AACG	TCCT	complex	missense_variant	EW033_RS15435		CocE/NonD family hydrolase	T209P	0.333333	3	SAUSA300_2531	CocE/NonD family hydrolase	SAUSA300_2531
NZ_LR130515_2923301_CTCTA_TTCTG	0.568	0.0669	0.706	0.0932		NZ_LR130515	2923301	CTCTA	TTCTG	complex	missense_variant	EW033_RS15510-EW033_RS15515				0.333333	3
NZ_LR130515_839729_G_A	0.0233	0.0673	0.872	0.0931	csbB	NZ_LR130515	839729	G	A	snp	missense_variant	EW033_RS04355		glycosyltransferase family 2 protein	V111I	0.333333	3	SAUSA300_0689	glycosyl transferase, group 2 family protein	SAUSA300_0689
NZ_LR130515_2551842_C_T	0.168	0.0676	1.01	0.093	moaB	NZ_LR130515	2551842	C	T	snp	missense_variant	EW033_RS13575		molybdenum cofactor biosynthesis protein MoaB	D25N	0.5	2	SAUSA300_2226	molybdenum cofactor biosynthesis protein B	moaB	moaB-moeB
NZ_LR130515_364527_A_C	0.274	0.0677	0.51	0.093	SAUSA300_0309	NZ_LR130515	364527	A	C	snp	missense_variant	EW033_RS01730		ABC transporter ATP-binding protein	K188Q	0.166667	6	SAUSA300_0309	ABC transporter ATP-binding protein	SAUSA300_0309	SAUSA300_0308-SAUSA300_0309
NZ_LR130515_1159090_A_G	0.597	0.0679	0.698	0.0929		NZ_LR130515	1159090	A	G	snp	missense_variant	EW033_RS00100				0.333333	3
NZ_LR130515_1415403_AGCGCAAG_GGCACAAT	0.0749	0.0679	-0.581	0.0929	SAUSA300_1219	NZ_LR130515	1415403	AGCGCAAG	GGCACAAT	complex	missense_variant	EW033_RS07335		sensor histidine kinase	V271L	0.0909091	11	SAUSA300_1219	putative sensor histidine kinase	SAUSA300_1219	SAUSA300_1217-SAUSA300_1218-SAUSA300_1219-SAUSA300_1220
NZ_LR130515_3040989_T_G	0.571	0.0681	-0.494	0.0928		NZ_LR130515	3040989	T	G	snp	missense_variant	EW033_RS16050-EW033_RS16055				0.125	8
NZ_LR130515_147281_T_C	0.566	0.0682	0.757	0.0928	sbnF	NZ_LR130515	147281	T	C	snp	missense_variant	EW033_RS00745	sbnF	3-(L-alanin-3-ylcarbamoyl)-2-[(2- aminoethylcarbamoyl)methyl]-2-hydroxypropanoate synthase SbnF	Y63H	0.333333	3	SAUSA300_0123	IucC family siderophore biosynthesis protein	SAUSA300_0123	sbnA-sbnB-sbnC-sbnD-sbnE-sbnF-sbnG-sbnH-sbnI
NZ_LR130515_152399_G_A	0.566	0.0682	0.757	0.0928	SAUSA300_0128	NZ_LR130515	152399	G	A	snp	missense_variant	EW033_RS00770		MFS transporter	V180I	0.333333	3	SAUSA300_0128	hypothetical protein	SAUSA300_0128
NZ_LR130515_152573_A_T	0.566	0.0682	0.757	0.0928		NZ_LR130515	152573	A	T	snp	missense_variant	EW033_RS00100				0.333333	3
NZ_LR130515_214249_C_T	0.566	0.0682	0.757	0.0928	ausA	NZ_LR130515	214249	C	T	snp	missense_variant	EW033_RS01050		non-ribosomal peptide synthetase	R1409C	0.5	2	SAUSA300_0181	non-ribosomal peptide synthetase	SAUSA300_0181	ausA-SAUSA300_0182
NZ_LR130515_219448_C_G	0.566	0.0682	0.757	0.0928	argB	NZ_LR130515	219448	C	G	snp	missense_variant	EW033_RS01065	argB	acetylglutamate kinase	Q91H	0.5	2	SAUSA300_0184	acetylglutamate kinase	argB	argB-argJ-argC-argD
NZ_LR130515_426764_T_A	0.566	0.0682	0.757	0.0928	SAUSA300_0326	NZ_LR130515	426764	T	A	snp	missense_variant	EW033_RS02145		protein-ADP-ribose hydrolase	L182M	0.333333	3	SAUSA300_0326	hypothetical protein	SAUSA300_0326	SAUSA300_0324-gcvH-L-SAUSA300_0326-sirTM-lplA2
NZ_LR130515_1540723_C_G	0.32	0.0682	-0.595	0.0928	ebh	NZ_LR130515	1540723	C	G	snp	missense_variant	EW033_RS07955	ebh	hyperosmolarity resistance protein Ebh	G8251R	0.2	5	SAUSA300_1327	cell surface protein	SAUSA300_1327
NZ_LR130515_2979114_T_A	0.566	0.0682	0.757	0.0928	secA2	NZ_LR130515	2979114	T	A	snp	missense_variant	EW033_RS15755	secA2	accessory Sec system translocase SecA2	I50L	0.333333	3	SAUSA300_2584	preprotein translocase subunit SecA	SAUSA300_2584	gtfB-gtfA-secA2-asp3-asp2-asp1-secY2
NZ_LR130515_3005705_G_C	0.566	0.0682	0.757	0.0928		NZ_LR130515	3005705	G	C	snp	missense_variant	EW033_RS15870-EW033_RS15875				0.333333	3
NZ_LR130515_1196885_A_G	0.264	0.0683	0.611	0.0928		NZ_LR130515	1196885	A	G	snp	missense_variant	EW033_RS00100				0.333333	3
NZ_LR130515_1196922_T_A	0.264	0.0683	0.611	0.0928		NZ_LR130515	1196922	T	A	snp	missense_variant	EW033_RS00100				0.333333	3
NZ_LR130515_2313913_T_C	0.178	0.0683	0.661	0.0928	SAUSA300_1998	NZ_LR130515	2313913	T	C	snp	missense_variant	EW033_RS12265		YeeE/YedE family protein	I60V	0.333333	3	SAUSA300_1998	hypothetical protein	SAUSA300_1998	SAUSA300_1997-SAUSA300_1998
NZ_LR130515_2942131_T_C	0.359	0.0683	0.67	0.0928	SAUSA300_2557	NZ_LR130515	2942131	T	C	snp	missense_variant	EW033_RS15615		ABC transporter ATP-binding protein	T127A	0.333333	3	SAUSA300_2557	ABC transporter protein	SAUSA300_2557	SAUSA300_2556-SAUSA300_2557-nsaS-nsaR-SAUSA300_2560
NZ_LR130515_2989779_A_T	0.217	0.0684	-0.626	0.0927	sasA	NZ_LR130515	2989779	A	T	snp	missense_variant	EW033_RS15780	sasA	serine-rich repeat glycoprotein adhesin SasA	L51I	0.25	4	SAUSA300_2589	cell wall anchor domain-containing protein	SAUSA300_2589
NZ_LR130515_786578_ACG_GCA	0.0129	0.0685	0.755	0.0927	dhaL	NZ_LR130515	786578	ACG	GCA	complex	missense_variant	EW033_RS04080	dhaL	dihydroxyacetone kinase subunit L	R9H	0.5	2	SAUSA300_0637	dihydroxyacetone kinase subunit DhaL	SAUSA300_0637	dhaK-dhaL-dhaM-SAUSA300_0639
NZ_LR130515_1583018_G_A	0.0129	0.0685	0.755	0.0927	pbp2	NZ_LR130515	1583018	G	A	snp	missense_variant	EW033_RS08040		penicillin-binding protein	V233I	0.5	2	SAUSA300_1341	penicillin binding protein 2	pbp2	recU-pbp2
NZ_LR130515_178665_G_A	0.0155	0.0686	-1.12	0.0927		NZ_LR130515	178665	G	A	snp	missense_variant	EW033_RS00100				0.5	2
NZ_LR130515_2850186_GT_TC	0.444	0.0686	0.604	0.0927	SAUSA300_2492	NZ_LR130515	2850186	GT	TC	mnp	missense_variant	EW033_RS15130		sugar O-acetyltransferase	L198I	0.25	4	SAUSA300_2492	acetyltransferase family protein	SAUSA300_2492
NZ_LR130515_283170_GT_TA	0.364	0.0687	0.657	0.0926		NZ_LR130515	283170	GT	TA	complex	missense_variant	EW033_RS00100				0.333333	3
NZ_LR130515_615685_G_A	0.468	0.0687	0.584	0.0926	SAUSA300_0482	NZ_LR130515	615685	G	A	snp	missense_variant	EW033_RS03175		polysaccharide biosynthesis protein	G110S	0.25	4	SAUSA300_0482	polysaccharide biosynthesis protein	SAUSA300_0482	rplY-pth-mfd-SAUSA300_0482-SAUSA300_0483-SAUSA300_0484-divIC
NZ_LR130515_1589295_A_G	0.77	0.0687	0.288	0.0926	dinG	NZ_LR130515	1589295	A	G	snp	missense_variant	EW033_RS08065		ATP-dependent helicase	F698S	0.111111	9	SAUSA300_1346	DnaQ family exonuclease/DinG family helicase	SAUSA300_1346	dinG-birA-papS-bshA
NZ_LR130515_1794781_T_G	0.491	0.0689	0.623	0.0926		NZ_LR130515	1794781	T	G	snp	missense_variant	EW033_RS00100				0.2	5
NZ_LR130515_200436_G_A	0.401	0.069	0.752	0.0925	SAUSA300_0171	NZ_LR130515	200436	G	A	snp	missense_variant	EW033_RS01000		cation transporter	D19N	0.333333	3	SAUSA300_0171	cation efflux family protein	SAUSA300_0171
NZ_LR130515_291861_A_G	0.401	0.069	0.752	0.0925		NZ_LR130515	291861	A	G	snp	missense_variant	EW033_RS00100				0.333333	3
NZ_LR130515_2873394_G_T	0.401	0.069	0.752	0.0925	gbaA	NZ_LR130515	2873394	G	T	snp	missense_variant	EW033_RS15240		TetR/AcrR family transcriptional regulator	A149S	0.333333	3	SAUSA300_2515	TetR family transcriptional regulator	SAUSA300_2515	gbaA-gbaB-SAUSA300_2517-SAUSA300_2518
NZ_LR130515_1060934_T_G	0.543	0.0691	0.476	0.0925	opp-4C	NZ_LR130515	1060934	T	G	snp	missense_variant	EW033_RS05540		ABC transporter permease	F13L	0.166667	6	SAUSA300_0896	oligopeptide ABC transporter permease	oppC	opp-4A-opp-4D-opp-4F-opp-4B-opp-4C
NZ_LR130515_7937_T_G	0.0879	0.0694	-0.558	0.0924	gyrA	NZ_LR130515	7937	T	G	snp	missense_variant	EW033_RS00030	gyrA	DNA gyrase subunit A	D483E	0.2	5	SAUSA300_0006	DNA gyrase subunit A	gyrA	SAUSA300_0003-recF-gyrB-gyrA
NZ_LR130515_330264_C_T	0.0568	0.0695	0.83	0.0924	lytM	NZ_LR130515	330264	C	T	snp	missense_variant	EW033_RS01540	lytM	glycine-glycine endopeptidase LytM	S176L	0.5	2	SAUSA300_0270	peptidoglycan hydrolase	lytM
NZ_LR130515_1866177_C_A	0.0543	0.0695	-0.382	0.0924	SAUSA300_1671	NZ_LR130515	1866177	C	A	snp	missense_variant	EW033_RS09530		HAD family hydrolase	S14I	0.5	2	SAUSA300_1671	hypothetical protein	SAUSA300_1671
NZ_LR130515_2986883_TTC_CTG	0.463	0.0695	0.605	0.0924	sasA	NZ_LR130515	2986883	TTC	CTG	complex	missense_variant	EW033_RS15780	sasA	serine-rich repeat glycoprotein adhesin SasA	MN1015IS	0.166667	6	SAUSA300_2589	cell wall anchor domain-containing protein	SAUSA300_2589
NZ_LR130515_3035523_ATT_GTC	0.269	0.0697	-0.515	0.0923	vraE	NZ_LR130515	3035523	ATT	GTC	complex	missense_variant	EW033_RS16015	vraE	peptide resistance ABC transporter permease subunit VraE	I446V	0.142857	7	SAUSA300_2634	ABC transporter permease	SAUSA300_2634	vraD-vraE-SAUSA300_2635-SAUSA300_2636
NZ_LR130515_2950607_ATTAAATTAA_TCTAACTTAT	0.0801	0.0698	0.785	0.0923		NZ_LR130515	2950607	ATTAAATTAA	TCTAACTTAT	complex	missense_variant	EW033_RS15655-EW033_RS15660				0.0833333	12
NZ_LR130515_1358875_C_A	0.0775	0.0699	-0.883	0.0923		NZ_LR130515	1358875	C	A	snp	missense_variant	EW033_RS00100				0.25	4
NZ_LR130515_2699556_A_C	0.0775	0.0699	-0.883	0.0923	EW033_RS14365	NZ_LR130515	2699556	A	C	snp	missense_variant	EW033_RS14365		hypothetical protein	M1?	0.25	4
NZ_LR130515_2699566_G_A	0.0775	0.0699	-0.883	0.0923		NZ_LR130515	2699566	G	A	snp	missense_variant	EW033_RS14365-EW033_RS14370				0.25	4
NZ_LR130515_263489_A_T	0.421	0.07	0.624	0.0922	hptA	NZ_LR130515	263489	A	T	snp	missense_variant	EW033_RS01235		extracellular solute-binding protein	D48E	0.25	4	SAUSA300_0219	putative iron compound A C transporter, iron compound-binding protein	SAUSA300_0219	hptR-hptS-hptA
NZ_LR130515_272039_T_A	0.421	0.07	0.624	0.0922		NZ_LR130515	272039	T	A	snp	missense_variant	EW033_RS00100				0.25	4
NZ_LR130515_530781_A_G	0.155	0.0701	0.625	0.0922	ssl5	NZ_LR130515	530781	A	G	snp	missense_variant	EW033_RS02740		superantigen-like protein SSL5	N181D	0.142857	7	SAUSA300_0399	superantigen-like protein 5	SAUSA300_0399
NZ_LR130515_1565375_ATTG_GTTT	0.142	0.0702	0.565	0.0921	ebh	NZ_LR130515	1565375	ATTG	GTTT	complex	missense_variant	EW033_RS07955	ebh	hyperosmolarity resistance protein Ebh	F32L	0.125	8	SAUSA300_1327	cell surface protein	SAUSA300_1327
NZ_LR130515_2032298_CT_TC	0.0336	0.0702	-0.822	0.0921		NZ_LR130515	2032298	CT	TC	mnp	missense_variant	EW033_RS00100				0.25	4
NZ_LR130515_3040994_C_T	0.0336	0.0702	-0.822	0.0921		NZ_LR130515	3040994	C	T	snp	missense_variant	EW033_RS16050-EW033_RS16055				0.2	5
NZ_LR130515_30510_CA_TG	0.282	0.0703	0.49	0.0921	adsA	NZ_LR130515	30510	CA	TG	complex	missense_variant	EW033_RS00135		LPXTG-anchored adenosine synthase AdsA	A18V	0.111111	9	SAUSA300_0025	5'-nucleotidase family protein	SAUSA300_0025
NZ_LR130515_1995539_CA_TT	0.251	0.0703	0.476	0.0921	traP	NZ_LR130515	1995539	CA	TT	complex	missense_variant	EW033_RS10230		signal transduction protein TRAP	A80V	0.0769231	13	SAUSA300_1784	signal transduction protein TRAP	SAUSA300_1784
NZ_LR130515_336513_T_C	0.961	0.0704	0.424	0.0921		NZ_LR130515	336513	T	C	snp	missense_variant	EW033_RS00100				0.0769231	13
NZ_LR130515_1788259_TTTCAAGA_CTCCAAAT	0.0724	0.0704	0.846	0.0921		NZ_LR130515	1788259	TTTCAAGA	CTCCAAAT	complex	missense_variant	EW033_RS00100				0.5	2
NZ_LR130515_562662_GTGGA_CTGGT	0.251	0.0705	-0.632	0.092		NZ_LR130515	562662	GTGGA	CTGGT	complex	missense_variant	EW033_RS00100				0.2	5
NZ_LR130515_310172_AC_TG	0.276	0.0707	0.236	0.092		NZ_LR130515	310172	AC	TG	complex	missense_variant	EW033_RS00100				0.0196078	51
NZ_LR130515_15616_G_A	0.53	0.0708	-0.646	0.0919	metX	NZ_LR130515	15616	G	A	snp	missense_variant	EW033_RS00065		alpha/beta fold hydrolase	E13K	0.5	2	SAUSA300_0012	putative homoserine O-acetyltransferase	SAUSA300_0012
NZ_LR130515_1512965_C_T	0.0982	0.0709	0.643	0.0919		NZ_LR130515	1512965	C	T	snp	missense_variant	EW033_RS00100				0.25	4
NZ_LR130515_586562_T_C	0.116	0.071	0.643	0.0919		NZ_LR130515	586562	T	C	snp	missense_variant	EW033_RS00100				0.25	4
NZ_LR130515_607051_A_AG	0.0207	0.0711	-0.593	0.0919		NZ_LR130515	607051	A	AG	ins	missense_variant	EW033_RS00100				0.0909091	11
NZ_LR130515_2414862_C_T	0.0775	0.0711	-0.844	0.0918		NZ_LR130515	2414862	C	T	snp	missense_variant	EW033_RS00100				0.25	4
NZ_LR130515_1019551_GC_AT	0.129	0.0712	0.483	0.0918		NZ_LR130515	1019551	GC	AT	complex	missense_variant	EW033_RS00100				0.0666667	15
NZ_LR130515_240696_G_C	0.0103	0.0713	0.853	0.0918	SAUSA300_0200	NZ_LR130515	240696	G	C	snp	missense_variant	EW033_RS01145		ABC transporter ATP-binding protein	T78S	0.142857	7	SAUSA300_0200	peptide ABC transporter ATP-binding protein	SAUSA300_0200
NZ_LR130515_1486352_C_T	0.0103	0.0713	0.853	0.0918	pstB	NZ_LR130515	1486352	C	T	snp	missense_variant	EW033_RS07690		phosphate ABC transporter ATP-binding protein	R101Q	0.5	2	SAUSA300_1280	phosphate transporter ATP-binding protein	pstB	phoU-pstB-pstA-pstC
NZ_LR130515_2349809_T_A	0.0103	0.0713	0.853	0.0918	SAUSA300_2031	NZ_LR130515	2349809	T	A	snp	missense_variant	EW033_RS12455		hypothetical protein	E146V	0.25	4	SAUSA300_2031	hypothetical protein	SAUSA300_2031	alr-acpS-SAUSA300_2029-SAUSA300_2030-SAUSA300_2031
NZ_LR130515_2504073_G_A	0.0413	0.0713	0.692	0.0918	EW033_RS13225	NZ_LR130515	2504073	G	A	snp	missense_variant	EW033_RS13225		hypothetical protein	S4F	0.5	2
NZ_LR130515_202983_GCAGA_ACAGG	0.225	0.0717	0.525	0.0917	ssuB	NZ_LR130515	202983	GCAGA	ACAGG	complex	missense_variant	EW033_RS01015		ABC transporter ATP-binding protein	G115D	0.25	4	SAUSA300_0174	hypothetical protein	SAUSA300_0174	ssuB-ssuA-ssuC-SAUSA300_0177
NZ_LR130515_681173_T_C	0.287	0.0717	0.52	0.0917		NZ_LR130515	681173	T	C	snp	missense_variant	EW033_RS00100				0.142857	7
NZ_LR130515_2703115_G_A	0.0827	0.0717	0.711	0.0917	hlgB	NZ_LR130515	2703115	G	A	snp	missense_variant	EW033_RS14380	hlgB	bi-component gamma-hemolysin HlgAB/HlgCB subunit B	Ter326Ter	0.5	2	SAUSA300_2367	gamma-hemolysin component B	hlgB	hlgC-hlgB
NZ_LR130515_527184_GTTATCAAT_ATCATTAAA	0.0801	0.0719	-0.798	0.0916	ssl2	NZ_LR130515	527184	GTTATCAAT	ATCATTAAA	complex	missense_variant	EW033_RS02720		superantigen-like protein SSL2	VIN215IIK	0.0588235	17	SAUSA300_0396	superantigen-like protein	set7
NZ_LR130515_1215411_GTCT_ATCA	0.468	0.0725	-0.481	0.0914		NZ_LR130515	1215411	GTCT	ATCA	complex	missense_variant	EW033_RS00100				0.166667	6
NZ_LR130515_1699763_T_A	0.0801	0.0727	-0.803	0.0913		NZ_LR130515	1699763	T	A	snp	missense_variant	EW033_RS00100				0.25	4
NZ_LR130515_704974_C_T	0.101	0.0728	-0.829	0.0913	SAUSA300_0557	NZ_LR130515	704974	C	T	snp	missense_variant	EW033_RS03610		HAD family hydrolase	A65V	0.333333	3	SAUSA300_0557	HAD family hydrolase	SAUSA300_0557
NZ_LR130515_796793_A_C	0.168	0.0728	0.335	0.0913	vraG	NZ_LR130515	796793	A	C	snp	missense_variant	EW033_RS04140		FtsX-like permease family protein	K282Q	0.037037	27	SAUSA300_0648	ABC transporter permease	SAUSA300_0648	vraF-vraG
NZ_LR130515_907229_G_T	0.455	0.0728	0.565	0.0913	SAUSA300_0746	NZ_LR130515	907229	G	T	snp	missense_variant	EW033_RS04690		tetratricopeptide repeat protein	V413L	0.2	5	SAUSA300_0746	TPR domain-containing protein	SAUSA300_0746	hprK-lgt-SAUSA300_0745-SAUSA300_0746-trxB
NZ_LR130515_1293466_AC_GA	0.101	0.0728	-0.829	0.0913	SAUSA300_1107	NZ_LR130515	1293466	AC	GA	mnp	missense_variant	EW033_RS06760		TM2 domain-containing protein	G66V	0.333333	3	SAUSA300_1107	hypothetical protein	SAUSA300_1107
NZ_LR130515_1293476_C_A	0.101	0.0728	-0.829	0.0913	SAUSA300_1107	NZ_LR130515	1293476	C	A	snp	missense_variant	EW033_RS06760		TM2 domain-containing protein	C63F	0.333333	3	SAUSA300_1107	hypothetical protein	SAUSA300_1107
NZ_LR130515_1293493_AAT_GAA	0.101	0.0728	-0.829	0.0913	SAUSA300_1107	NZ_LR130515	1293493	AAT	GAA	complex	missense_variant	EW033_RS06760		TM2 domain-containing protein	I57F	0.333333	3	SAUSA300_1107	hypothetical protein	SAUSA300_1107
NZ_LR130515_3022883_ACC_GTA	0.367	0.0728	-0.433	0.0913	pcp	NZ_LR130515	3022883	ACC	GTA	complex	missense_variant	EW033_RS15965	pcp	pyroglutamyl-peptidase I	HL205RI	0.0909091	11	SAUSA300_2623	pyrrolidone-carboxylate peptidase	pcp
NZ_LR130515_32848_T_G	0.0956	0.073	-0.482	0.0913		NZ_LR130515	32848	T	G	snp	missense_variant	EW033_RS00100				0.166667	6
NZ_LR130515_152628_C_T	0.171	0.073	-0.565	0.0912		NZ_LR130515	152628	C	T	snp	missense_variant	EW033_RS00100				0.142857	7
NZ_LR130515_1833264_C_T	0.217	0.0731	0.443	0.0912		NZ_LR130515	1833264	C	T	snp	missense_variant	EW033_RS00100				0.0666667	15
NZ_LR130515_219003_C_A	0.0672	0.0732	0.608	0.0912	argB	NZ_LR130515	219003	C	A	snp	missense_variant	EW033_RS01065	argB	acetylglutamate kinase	A240S	0.027027	37	SAUSA300_0184	acetylglutamate kinase	argB	argB-argJ-argC-argD
NZ_LR130515_1121121_AGGG_A	0.0827	0.0732	-0.327	0.0912		NZ_LR130515	1121121	AGGG	A	del	missense_variant	EW033_RS00100				0.0833333	12
NZ_LR130515_2179075_GTA_CTC	0.181	0.0733	0.622	0.0911	agrC	NZ_LR130515	2179075	GTA	CTC	complex	missense_variant	EW033_RS11480		GHKL domain-containing protein	SS304TR	0.25	4	SAUSA300_1991	accessory gene regulator protein C	agrC	agrB-agrD-agrC-agrA
NZ_LR130515_2179150_C_G	0.181	0.0733	0.622	0.0911	agrC	NZ_LR130515	2179150	C	G	snp	missense_variant	EW033_RS11480		GHKL domain-containing protein	T329S	0.25	4	SAUSA300_1991	accessory gene regulator protein C	agrC	agrB-agrD-agrC-agrA
NZ_LR130515_23269_T_C	0.0879	0.0735	-0.583	0.0911		NZ_LR130515	23269	T	C	snp	missense_variant	EW033_RS00095-EW033_RS00100				0.0909091	11
NZ_LR130515_2811072_C_A	0.0103	0.0736	0.809	0.091		NZ_LR130515	2811072	C	A	snp	missense_variant	EW033_RS14925-EW033_RS14930				0.333333	3
NZ_LR130515_299015_A_C	0.468	0.0737	0.664	0.091		NZ_LR130515	299015	A	C	snp	missense_variant	EW033_RS00100				0.25	4
NZ_LR130515_222100_T_G	0.375	0.0738	0.718	0.091	argD	NZ_LR130515	222100	T	G	snp	missense_variant	EW033_RS01080	rocD	ornithine--oxo-acid transaminase	N382H	0.333333	3	SAUSA300_0187	ornithine aminotransferase	rocD	argB-argJ-argC-argD
NZ_LR130515_283374_G_A	0.375	0.0738	0.718	0.091		NZ_LR130515	283374	G	A	snp	missense_variant	EW033_RS00100				0.333333	3
NZ_LR130515_321322_C_T	0.375	0.0738	0.718	0.091		NZ_LR130515	321322	C	T	snp	missense_variant	EW033_RS00100				0.333333	3
NZ_LR130515_2160359_T_G	0.163	0.0739	0.771	0.0909	lukH	NZ_LR130515	2160359	T	G	snp	missense_variant	EW033_RS11380	lukH	bi-component leukocidin LukGH subunit H	K315Q	0.25	4	SAUSA300_1975	Aerolysin/leukocidin family protein	SAUSA300_1975	lukG-lukH
NZ_LR130515_2160372_AGGTG_TTGTC	0.163	0.0739	0.771	0.0909	lukH	NZ_LR130515	2160372	AGGTG	TTGTC	complex	missense_variant	EW033_RS11380	lukH	bi-component leukocidin LukGH subunit H	AP309GQ	0.25	4	SAUSA300_1975	Aerolysin/leukocidin family protein	SAUSA300_1975	lukG-lukH
NZ_LR130515_1614402_TAC_AACT	0.15	0.0741	-0.443	0.0909		NZ_LR130515	1614402	TAC	AACT	complex	missense_variant	EW033_RS00100				0.0666667	15
NZ_LR130515_1955055_C_A	0.354	0.0743	-0.383	0.0908	SAUSA300_1744	NZ_LR130515	1955055	C	A	snp	missense_variant	EW033_RS09940		hypothetical protein	H122N	0.111111	9	SAUSA300_1744	hypothetical protein	SAUSA300_1744
NZ_LR130515_1820993_A_G	0.972	0.0744	0.475	0.0908	SAUSA300_1637	NZ_LR130515	1820993	A	G	snp	missense_variant	EW033_RS09330		hypothetical protein	Y442H	0.142857	7	SAUSA300_1637	hypothetical protein	SAUSA300_1637
NZ_LR130515_2562541_TATAA_AATGT	0.243	0.0746	0.54	0.0907	SAUSA300_2237	NZ_LR130515	2562541	TATAA	AATGT	complex	missense_variant	EW033_RS13630	yut	urea transporter	F49Y	0.111111	9	SAUSA300_2237	putative urea transporter	SAUSA300_2237
NZ_LR130515_2562556_AGTATAGGCG_TGCATAAGCT	0.243	0.0746	0.54	0.0907	SAUSA300_2237	NZ_LR130515	2562556	AGTATAGGCG	TGCATAAGCT	complex	missense_variant	EW033_RS13630	yut	urea transporter	T45A	0.111111	9	SAUSA300_2237	putative urea transporter	SAUSA300_2237
NZ_LR130515_3028246_T_C	0.401	0.0747	-0.376	0.0907		NZ_LR130515	3028246	T	C	snp	missense_variant	EW033_RS15980-EW033_RS15985				0.0714286	14
NZ_LR130515_1561426_A_C	0.354	0.0748	0.62	0.0907	ebh	NZ_LR130515	1561426	A	C	snp	missense_variant	EW033_RS07955	ebh	hyperosmolarity resistance protein Ebh	S1350A	0.166667	6	SAUSA300_1327	cell surface protein	SAUSA300_1327
NZ_LR130515_1702474_C_A	0.106	0.0748	0.5	0.0907		NZ_LR130515	1702474	C	A	snp	missense_variant	EW033_RS00100				0.2	5
NZ_LR130515_816905_C_T	0.176	0.0749	0.824	0.0907	uppP	NZ_LR130515	816905	C	T	snp	missense_variant	EW033_RS04250		undecaprenyl-diphosphate phosphatase	V14I	0.5	2	SAUSA300_0669	undecaprenyl pyrophosphate phosphatase	SAUSA300_0669
NZ_LR130515_254568_A_C	0.0181	0.075	0.839	0.0906	SAUSA300_0212	NZ_LR130515	254568	A	C	snp	missense_variant	EW033_RS01200		Gfo/Idh/MocA family oxidoreductase	D66A	0.5	2	SAUSA300_0212	Gfo/Idh/MocA family oxidoreductase	SAUSA300_0212	SAUSA300_0212-SAUSA300_0213-SAUSA300_0214
NZ_LR130515_2904871_AAAAGC_GAAGT	0.0336	0.0751	0.756	0.0906		NZ_LR130515	2904871	AAAAGC	GAAGT	complex	missense_variant	EW033_RS15415-EW033_RS15420				0.2	5
NZ_LR130515_234726_AGT_GGC	0.548	0.0752	0.435	0.0905		NZ_LR130515	234726	AGT	GGC	complex	missense_variant	EW033_RS00100				0.0714286	14
NZ_LR130515_1992586_AG_TA	0.186	0.0752	0.627	0.0906	hemY	NZ_LR130515	1992586	AG	TA	complex	missense_variant	EW033_RS10210		protoporphyrinogen oxidase	T137I	0.333333	3	SAUSA300_1781	protoporphyrinogen oxidase	hemG	hemY-hemH-hemE
NZ_LR130515_1992598_TAA_GAT	0.186	0.0752	0.627	0.0906	hemY	NZ_LR130515	1992598	TAA	GAT	complex	missense_variant	EW033_RS10210		protoporphyrinogen oxidase	L133I	0.5	2	SAUSA300_1781	protoporphyrinogen oxidase	hemG	hemY-hemH-hemE
NZ_LR130515_1992607_AAAC_TAAT	0.186	0.0752	0.627	0.0906	hemY	NZ_LR130515	1992607	AAAC	TAAT	complex	missense_variant	EW033_RS10210		protoporphyrinogen oxidase	F130L	0.333333	3	SAUSA300_1781	protoporphyrinogen oxidase	hemG	hemY-hemH-hemE
NZ_LR130515_2176015_T_A	0.587	0.0753	0.622	0.0905	SAUSA300_1987	NZ_LR130515	2176015	T	A	snp	missense_variant	EW033_RS11460		carbon-nitrogen family hydrolase	Y128N	0.5	2	SAUSA300_1987	carbon-nitrogen family hydrolase	SAUSA300_1987
NZ_LR130515_2371549_C_T	0.0775	0.0753	-0.359	0.0905	thiD	NZ_LR130515	2371549	C	T	snp	missense_variant	EW033_RS12565	thiD	bifunctional hydroxymethylpyrimidine kinase/phosphomethylpyrimidine kinase	G196D	0.333333	3	SAUSA300_2049	phosphomethylpyrimidine kinase	thiD	thiE-thiM-thiD-tenA
NZ_LR130515_2857813_C_A	0.576	0.0753	0.727	0.0905	crtN	NZ_LR130515	2857813	C	A	snp	missense_variant	EW033_RS15160	crtI	phytoene desaturase	A332S	0.333333	3	SAUSA300_2498	squalene synthase	crtN	crtN-crtM-crtQ-crtP-crtO
NZ_LR130515_358084_C_A	0.473	0.0754	0.518	0.0905		NZ_LR130515	358084	C	A	snp	missense_variant	EW033_RS00100				0.111111	9
NZ_LR130515_1396970_GAT_TAC	0.0672	0.0754	0.637	0.0905		NZ_LR130515	1396970	GAT	TAC	complex	missense_variant	EW033_RS00100				0.166667	6
NZ_LR130515_1560127_TATCTGAA_CATCAGAT	0.106	0.0754	-0.409	0.0905	ebh	NZ_LR130515	1560127	TATCTGAA	CATCAGAT	complex	missense_variant	EW033_RS07955	ebh	hyperosmolarity resistance protein Ebh	M1783V	0.0588235	17	SAUSA300_1327	cell surface protein	SAUSA300_1327
NZ_LR130515_1788295_C_T	0.0284	0.0759	0.737	0.0903		NZ_LR130515	1788295	C	T	snp	missense_variant	EW033_RS00100				0.2	5
NZ_LR130515_796887_C_T	0.0388	0.0762	-0.575	0.0902	vraG	NZ_LR130515	796887	C	T	snp	missense_variant	EW033_RS04140		FtsX-like permease family protein	S313L	0.2	5	SAUSA300_0648	ABC transporter permease	SAUSA300_0648	vraF-vraG
NZ_LR130515_2096493_G_A	0.465	0.0763	0.488	0.0902		NZ_LR130515	2096493	G	A	snp	missense_variant	EW033_RS00100				0.125	8
NZ_LR130515_2339442_A_T	0.114	0.0763	0.891	0.0902		NZ_LR130515	2339442	A	T	snp	missense_variant	EW033_RS00100				0.333333	3
NZ_LR130515_2930289_G_A	0.556	0.0765	0.561	0.0902		NZ_LR130515	2930289	G	A	snp	missense_variant	EW033_RS15550-EW033_RS15555				0.2	5
NZ_LR130515_2972207_C_T	0.349	0.0765	0.56	0.0902	sasF	NZ_LR130515	2972207	C	T	snp	missense_variant	EW033_RS15740	sasF	cell-wall-anchored protein SasF	V516I	0.333333	3	SAUSA300_2581	putative surface anchored protein	SAUSA300_2581
NZ_LR130515_3004120_GGTC_AGTT	0.341	0.0766	-0.467	0.0901	gehA	NZ_LR130515	3004120	GGTC	AGTT	complex	missense_variant	EW033_RS15870	lip1	YSIRK domain-containing triacylglycerol lipase Lip1	DH217NY	0.142857	7	SAUSA300_2603	triacylglycerol lipase	lip
NZ_LR130515_597693_T_A	0.346	0.0767	-0.569	0.0901		NZ_LR130515	597693	T	A	snp	missense_variant	EW033_RS00100				0.2	5
NZ_LR130515_1630342_T_C	0.142	0.0767	-0.555	0.0901	scpA	NZ_LR130515	1630342	T	C	snp	missense_variant	EW033_RS08290		segregation/condensation protein A	I235V	0.25	4	SAUSA300_1445	hypothetical protein	scpA	rluB-scpB-scpA
NZ_LR130515_3036246_T_G	0.318	0.0767	-0.39	0.0901	SAUSA300_2635	NZ_LR130515	3036246	T	G	snp	missense_variant	EW033_RS16020	vraH	peptide resistance ABC transporter activity modulator VraH	I29M	0.0666667	15	SAUSA300_2635	hypothetical protein	SAUSA300_2635	vraD-vraE-SAUSA300_2635-SAUSA300_2636
NZ_LR130515_1203143_G_A	0.757	0.0769	0.269	0.09		NZ_LR130515	1203143	G	A	snp	missense_variant	EW033_RS00100				0.0769231	13
NZ_LR130515_422598_T_C	0.233	0.077	0.324	0.09	SAUSA300_0321	NZ_LR130515	422598	T	C	snp	missense_variant	EW033_RS02120		alpha/beta hydrolase	K226E	0.333333	3	SAUSA300_0321	hypothetical protein	SAUSA300_0321	SAUSA300_0321-SAUSA300_0322
NZ_LR130515_2986883_T_C	0.506	0.0771	-0.41	0.09	sasA	NZ_LR130515	2986883	T	C	snp	missense_variant	EW033_RS15780	sasA	serine-rich repeat glycoprotein adhesin SasA	N1016S	0.166667	6	SAUSA300_2589	cell wall anchor domain-containing protein	SAUSA300_2589
NZ_LR130515_483124_C_T	0.168	0.0772	0.983	0.0899		NZ_LR130515	483124	C	T	snp	missense_variant	EW033_RS00100				0.333333	3
NZ_LR130515_686474_TAATCAGACTACT_CAATTCTACAACA	0.168	0.0772	0.983	0.0899	sdrC	NZ_LR130515	686474	TAATCAGACTACT	CAATTCTACAACA	complex	missense_variant	EW033_RS03555		MSCRAMM family adhesin SdrC	Q205S	0.142857	7	SAUSA300_0546	sdrC protein	sdrC
NZ_LR130515_1057948_T_TG	0.0388	0.0773	0.762	0.0899		NZ_LR130515	1057948	T	TG	ins	missense_variant	EW033_RS00100				0.333333	3
NZ_LR130515_2992785_GA_TT	0.367	0.0774	0.552	0.0899		NZ_LR130515	2992785	GA	TT	complex	missense_variant	EW033_RS15800-EW033_RS15805				0.166667	6
NZ_LR130515_256539_C_A	0.0465	0.0775	-0.74	0.0898		NZ_LR130515	256539	C	A	snp	missense_variant	EW033_RS00100				0.333333	3
NZ_LR130515_1149179_G_T	0.0129	0.0775	-0.991	0.0898	purD	NZ_LR130515	1149179	G	T	snp	missense_variant	EW033_RS05990		phosphoribosylamine--glycine ligase	R314L	0.5	2	SAUSA300_0976	phosphoribosylamine--glycine ligase	purD	purE-purK-purC-purS-purQ-purL-purF-purM-purN-purH-purD
NZ_LR130515_2667127_AT_A	0.0129	0.0775	-0.991	0.0898		NZ_LR130515	2667127	AT	A	del	missense_variant	EW033_RS14175-EW033_RS14180				0.5	2
NZ_LR130515_298276_T_TA	0.0827	0.0777	-0.343	0.0898	SAUSA300_0244	NZ_LR130515	298276	T	TA	ins	missense_variant	EW033_RS01390		galactitol-1-phosphate 5-dehydrogenase	G252fs	0.5	2	SAUSA300_0244	zinc-binding dehydrogenase family oxidoreductase	SAUSA300_0244	SAUSA300_0241-SAUSA300_0242-SAUSA300_0243-SAUSA300_0244
NZ_LR130515_1060971_G_A	0.45	0.0778	0.447	0.0898	opp-4C	NZ_LR130515	1060971	G	A	snp	missense_variant	EW033_RS05540		ABC transporter permease	V26I	0.111111	9	SAUSA300_0896	oligopeptide ABC transporter permease	oppC	opp-4A-opp-4D-opp-4F-opp-4B-opp-4C
NZ_LR130515_127582_CTGAATC_ATTAAGT	0.0724	0.0781	-0.627	0.0897		NZ_LR130515	127582	CTGAATC	ATTAAGT	complex	missense_variant	EW033_RS00100				0.25	4
NZ_LR130515_1399790_T_A	0.545	0.0781	0.581	0.0897		NZ_LR130515	1399790	T	A	snp	missense_variant	EW033_RS00100				0.25	4
NZ_LR130515_2913852_G_T	0.576	0.0781	0.71	0.0897		NZ_LR130515	2913852	G	T	snp	missense_variant	EW033_RS15465-EW033_RS15475				0.333333	3
NZ_LR130515_169061_A_G	0.545	0.0782	0.638	0.0896		NZ_LR130515	169061	A	G	snp	missense_variant	EW033_RS00100				0.333333	3
NZ_LR130515_936282_G_A	0.0181	0.0783	0.587	0.0896		NZ_LR130515	936282	G	A	snp	missense_variant	EW033_RS00100				0.333333	3
NZ_LR130515_2748000_A_C	0.145	0.0783	-0.638	0.0896	SAUSA300_2405	NZ_LR130515	2748000	A	C	snp	missense_variant	EW033_RS14620		hypothetical protein	I77L	0.25	4	SAUSA300_2405	hypothetical protein	SAUSA300_2405
NZ_LR130515_447791_GAAGA_AAATG	0.282	0.0784	-0.544	0.0896	tatC	NZ_LR130515	447791	GAAGA	AAATG	complex	missense_variant	EW033_RS02255	tatC	twin-arginine translocase subunit TatC	L156I	0.142857	7	SAUSA300_0347	Sec-independent protein translocase TatC	tatC	tatC-tatA
NZ_LR130515_952369_T_G	0.297	0.0785	0.306	0.0896		NZ_LR130515	952369	T	G	snp	missense_variant	EW033_RS00100				0.037037	27
NZ_LR130515_1386759_G_T	0.176	0.0785	0.494	0.0895		NZ_LR130515	1386759	G	T	snp	missense_variant	EW033_RS00100				0.0909091	11
NZ_LR130515_699105_TTTTTGGG_CTTTCGGT	0.163	0.0788	0.94	0.0895	SAUSA300_0550	NZ_LR130515	699105	TTTTTGGG	CTTTCGGT	complex	missense_variant	EW033_RS03575		glycosyltransferase	I353V	0.333333	3	SAUSA300_0550	glycosyl transferase, group 1 family protein	SAUSA300_0550
NZ_LR130515_523357_T_A	0.0284	0.0789	0.743	0.0894	SAUSA300_0392	NZ_LR130515	523357	T	A	snp	missense_variant	EW033_RS02700		hypothetical protein	M1?	0.2	5	SAUSA300_0392	hypothetical protein	SAUSA300_0392
NZ_LR130515_1477938_CAA_ACG	0.0879	0.0792	0.858	0.0893	SAUSA300_1271	NZ_LR130515	1477938	CAA	ACG	complex	missense_variant	EW033_RS07640		Cof-type HAD-IIB family hydrolase	FK89LR	0.2	5	SAUSA300_1271	hydrolase-like protein	SAUSA300_1271
NZ_LR130515_356947_G_A	0.093	0.0793	0.491	0.0893	EW033_RS01685	NZ_LR130515	356947	G	A	snp	missense_variant	EW033_RS01685		TIGR01741 family protein	V140I	0.125	8
NZ_LR130515_2537715_CC_TT	0.191	0.0793	0.529	0.0893		NZ_LR130515	2537715	CC	TT	complex	missense_variant	EW033_RS13480-EW033_RS13485				0.125	8
NZ_LR130515_2605768_GAGAC_AAGAA	0.258	0.0795	0.543	0.0893		NZ_LR130515	2605768	GAGAC	AAGAA	complex	missense_variant	EW033_RS13860-EW033_RS13865				0.142857	7
NZ_LR130515_283341_CTAGA_ATTGG	0.377	0.0797	0.66	0.0892		NZ_LR130515	283341	CTAGA	ATTGG	complex	missense_variant	EW033_RS00100				0.2	5
NZ_LR130515_1360738_A_G	0.736	0.0797	0.269	0.0892	ribC	NZ_LR130515	1360738	A	G	snp	missense_variant	EW033_RS07070	ribF	riboflavin biosynthesis protein RibF	T53A	0.25	4	SAUSA300_1165	riboflavin biosynthesis protein ribF	ribF	truB-ribC
NZ_LR130515_523168_AGC_TAA	0.238	0.0798	0.41	0.0892		NZ_LR130515	523168	AGC	TAA	complex	missense_variant	EW033_RS00100				0.0625	16
NZ_LR130515_3048240_CTCTCT_C	0.284	0.0799	0.486	0.0891		NZ_LR130515	3048240	CTCTCT	C	del	missense_variant	EW033_RS16085-EW033_RS16090				0.166667	6
NZ_LR130515_548404_T_C	0.581	0.08	0.575	0.0891		NZ_LR130515	548404	T	C	snp	missense_variant	EW033_RS00100				0.333333	3
NZ_LR130515_867585_T_A	0.233	0.08	-0.351	0.0891		NZ_LR130515	867585	T	A	snp	missense_variant	EW033_RS00100				0.0555556	18
NZ_LR130515_114329_ACG_CCT	0.351	0.0802	0.48	0.089		NZ_LR130515	114329	ACG	CCT	complex	missense_variant	EW033_RS00100				0.142857	7
NZ_LR130515_1596528_A_G	0.305	0.0803	0.593	0.089	SAUSA300_1352	NZ_LR130515	1596528	A	G	snp	missense_variant	EW033_RS08095		DUF1405 domain-containing protein	I142T	0.333333	3	SAUSA300_1352	hypothetical protein	SAUSA300_1352	SAUSA300_1351-SAUSA300_1352-SAUSA300_1353-SAUSA300_1354
NZ_LR130515_2962768_CATCA_TATCG	0.349	0.0803	-0.43	0.089		NZ_LR130515	2962768	CATCA	TATCG	complex	missense_variant	EW033_RS15710-EW033_RS15715				0.142857	7
NZ_LR130515_1493497_T_G	0.217	0.0804	0.49	0.089		NZ_LR130515	1493497	T	G	snp	missense_variant	EW033_RS00100				0.125	8
NZ_LR130515_2160859_CGA_GGG	0.158	0.0804	0.641	0.089	lukH	NZ_LR130515	2160859	CGA	GGG	complex	missense_variant	EW033_RS11380	lukH	bi-component leukocidin LukGH subunit H	R148P	0.0909091	11	SAUSA300_1975	Aerolysin/leukocidin family protein	SAUSA300_1975	lukG-lukH
NZ_LR130515_127489_T_C	0.127	0.0805	-0.607	0.0889		NZ_LR130515	127489	T	C	snp	missense_variant	EW033_RS00100				0.166667	6
NZ_LR130515_272462_CCCGCT_ACCACC	0.302	0.0805	0.484	0.0889		NZ_LR130515	272462	CCCGCT	ACCACC	complex	missense_variant	EW033_RS00100				0.166667	6
NZ_LR130515_14673_ACAAGCAT_GCAAACGC	0.411	0.0807	-0.531	0.0889	SAUSA300_0010	NZ_LR130515	14673	ACAAGCAT	GCAAACGC	complex	missense_variant	EW033_RS00055		AzlC family ABC transporter permease	A161T	0.25	4	SAUSA300_0010	hypothetical protein	SAUSA300_0010	SAUSA300_0010-SAUSA300_0011
NZ_LR130515_3009576_TTG_GTA	0.411	0.0807	-0.531	0.0889	SAUSA300_2610	NZ_LR130515	3009576	TTG	GTA	complex	missense_variant	EW033_RS15900		histidinol-phosphate aminotransferase family protein	K168T	0.25	4	SAUSA300_2610	histidinol-phosphate aminotransferase hisC	hisC	hisI-hisF-hisA-hisH-hisB-SAUSA300_2610-hisD-hisG-hisZ
NZ_LR130515_748671_C_T	0.54	0.0809	0.56	0.0888	SAUSA300_0599	NZ_LR130515	748671	C	T	snp	missense_variant	EW033_RS03885		iron ABC transporter permease	T269I	0.25	4	SAUSA300_0599	iron compound ABC transporter permease	SAUSA300_0599	SAUSA300_0599-SAUSA300_0600-SAUSA300_0601
NZ_LR130515_2122677_C_T	0.0103	0.0809	0.81	0.0888	SAUSA300_1928	NZ_LR130515	2122677	C	T	snp	missense_variant	EW033_RS11090		hypothetical protein	R644Q	0.25	4	SAUSA300_1928	phi77 ORF002-like protein, phage minor structural protein	SAUSA300_1928	SAUSA300_1927-SAUSA300_1928-SAUSA300_1929-SAUSA300_1930
NZ_LR130515_2789751_C_A	0.0207	0.0809	-0.592	0.0888	EW033_RS14815	NZ_LR130515	2789751	C	A	snp	missense_variant	EW033_RS14815		hypothetical protein	E21*	0.125	8
NZ_LR130515_1491222_TAGCAAATA_AAGTAAGTG	0.0284	0.081	0.83	0.0888	cvfB	NZ_LR130515	1491222	TAGCAAATA	AAGTAAGTG	complex	missense_variant	EW033_RS07715	cvfB	RNA-binding virulence regulatory protein CvfB	Y122H	0.333333	3	SAUSA300_1284	hypothetical protein	SAUSA300_1284
NZ_LR130515_2099316_G_A	0.0775	0.081	0.843	0.0888		NZ_LR130515	2099316	G	A	snp	missense_variant	EW033_RS00100				0.333333	3
NZ_LR130515_2099324_T_G	0.0775	0.081	0.843	0.0888		NZ_LR130515	2099324	T	G	snp	missense_variant	EW033_RS00100				0.333333	3
NZ_LR130515_2099387_A_G	0.0775	0.081	0.843	0.0888	SAUSA300_1903	NZ_LR130515	2099387	A	G	snp	missense_variant	EW033_RS10915		YolD-like family protein	N20S	0.333333	3	SAUSA300_1903	hypothetical protein	SAUSA300_1903
NZ_LR130515_2099394_ACCTATG_CCCAGTA	0.0775	0.081	0.843	0.0888	SAUSA300_1903	NZ_LR130515	2099394	ACCTATG	CCCAGTA	complex	missense_variant	EW033_RS10915		YolD-like family protein	M24V	0.333333	3	SAUSA300_1903	hypothetical protein	SAUSA300_1903
NZ_LR130515_2108587_AC_GT	0.119	0.0811	0.373	0.0888	SAUSA300_1915	NZ_LR130515	2108587	AC	GT	complex	missense_variant	EW033_RS10980		hypothetical protein	S57N	0.047619	21	SAUSA300_1915	hypothetical protein	SAUSA300_1915
NZ_LR130515_3013704_GA_TT	0.245	0.0811	0.49	0.0888	SAUSA300_2614	NZ_LR130515	3013704	GA	TT	mnp	missense_variant	EW033_RS15920		polysaccharide deacetylase family protein	S171K	0.166667	6	SAUSA300_2614	hypothetical protein	SAUSA300_2614
NZ_LR130515_422257_GGA_AGC	0.191	0.0812	-0.516	0.0887		NZ_LR130515	422257	GGA	AGC	complex	missense_variant	EW033_RS00100				0.142857	7
NZ_LR130515_890630_T_G	0.791	0.0812	0.312	0.0887	comFC	NZ_LR130515	890630	T	G	snp	missense_variant	EW033_RS04620		ComF family protein	S205A	0.333333	3	SAUSA300_0735	hypothetical protein	SAUSA300_0735	comFA-comFC-saHPF
NZ_LR130515_1214370_AAAAG_TAAA	0.0827	0.0812	0.546	0.0888		NZ_LR130515	1214370	AAAAG	TAAA	complex	missense_variant	EW033_RS00100				0.166667	6
NZ_LR130515_1556692_A_T	0.313	0.0812	0.495	0.0888	ebh	NZ_LR130515	1556692	A	T	snp	missense_variant	EW033_RS07955	ebh	hyperosmolarity resistance protein Ebh	S2928T	0.142857	7	SAUSA300_1327	cell surface protein	SAUSA300_1327
NZ_LR130515_2699430_TTT_CTA	0.093	0.0812	0.872	0.0888	EW033_RS14365	NZ_LR130515	2699430	TTT	CTA	complex	missense_variant	EW033_RS14365		hypothetical protein	K43R	0.25	4
NZ_LR130515_2684319_C_A	0.243	0.0813	0.392	0.0887	SAUSA300_2349	NZ_LR130515	2684319	C	A	snp	missense_variant	EW033_RS14255		formate/nitrite transporter family protein	K115N	0.0666667	15	SAUSA300_2349	formate/nitrite transporter family protein	SAUSA300_2349
NZ_LR130515_432489_G_A	0.367	0.0814	0.513	0.0887	SAUSA300_0333	NZ_LR130515	432489	G	A	snp	missense_variant	EW033_RS02180		BglG family transcription antiterminator	A651V	0.166667	6	SAUSA300_0333	BglG family transcriptional antiterminator	SAUSA300_0333	ulaA-SAUSA300_0331-SAUSA300_0332-SAUSA300_0333
NZ_LR130515_1332047_G_T	0.0801	0.0815	-0.772	0.0887	dprA	NZ_LR130515	1332047	G	T	snp	missense_variant	EW033_RS06940	dprA	DNA-protecting protein DprA	A12S	0.25	4	SAUSA300_1142	DNA protecting protein DprA	dprA	dprA-topA
NZ_LR130515_1954382_T_A	0.568	0.0815	-0.478	0.0887	SAUSA300_1743	NZ_LR130515	1954382	T	A	snp	missense_variant	EW033_RS09935		DUF3969 family protein	L45M	0.333333	3	SAUSA300_1743	hypothetical protein	SAUSA300_1743	SAUSA300_1741-SAUSA300_1742-SAUSA300_1743
NZ_LR130515_2645792_A_T	0.385	0.0815	-0.51	0.0887	SAUSA300_2314	NZ_LR130515	2645792	A	T	snp	missense_variant	EW033_RS14070		CDP-glycerol glycerophosphotransferase family protein	I135L	0.166667	6	SAUSA300_2314	hypothetical protein	SAUSA300_2314
NZ_LR130515_2997857_A_C	0.357	0.0818	0.527	0.0886		NZ_LR130515	2997857	A	C	snp	missense_variant	EW033_RS15835-EW033_RS15840				0.142857	7
NZ_LR130515_935057_GTTCAGATTCTGGCAGCGATTCTAA_G	0.0568	0.0819	-0.62	0.0886	clfA	NZ_LR130515	935057	GTTCAGATTCTGGCAGCGATTCTAA	G	del	missense_variant	EW033_RS04835	clfA	MSCRAMM family adhesin clumping factor ClfA	S569_D576del	0.2	5	SAUSA300_0772	clumping factor A	clfA
NZ_LR130515_1539573_A_G	0.357	0.0819	-0.434	0.0886	ebh	NZ_LR130515	1539573	A	G	snp	missense_variant	EW033_RS07955	ebh	hyperosmolarity resistance protein Ebh	I8634T	0.142857	7	SAUSA300_1327	cell surface protein	SAUSA300_1327
NZ_LR130515_2414093_C_A	0.0181	0.0819	0.668	0.0885		NZ_LR130515	2414093	C	A	snp	missense_variant	EW033_RS00100				0.333333	3
NZ_LR130515_2093734_T_C	0.0698	0.082	-0.548	0.0885	SAUSA300_1898	NZ_LR130515	2093734	T	C	snp	missense_variant	EW033_RS10885		pectate lyase	I156V	0.333333	3	SAUSA300_1898	hypothetical protein	SAUSA300_1898
NZ_LR130515_2970187_C_A	0.196	0.0821	0.551	0.0885	SAUSA300_2579	NZ_LR130515	2970187	C	A	snp	missense_variant	EW033_RS15730		amidase domain-containing protein	Q391K	0.25	4	SAUSA300_2579	N-acetylmuramoyl-L-alanine amidase	SAUSA300_2579
NZ_LR130515_2985987_C_T	0.367	0.0821	0.509	0.0885	sasA	NZ_LR130515	2985987	C	T	snp	missense_variant	EW033_RS15780	sasA	serine-rich repeat glycoprotein adhesin SasA	A1315T	0.125	8	SAUSA300_2589	cell wall anchor domain-containing protein	SAUSA300_2589
NZ_LR130515_1082984_AGTATTGAG_CAGCATTAAT	0.0155	0.0825	0.645	0.0884		NZ_LR130515	1082984	AGTATTGAG	CAGCATTAAT	complex	missense_variant	EW033_RS00100				0.0714286	14
NZ_LR130515_200277_T_C	0.362	0.0827	0.44	0.0883		NZ_LR130515	200277	T	C	snp	missense_variant	EW033_RS00100				0.111111	9
NZ_LR130515_342295_T_C	0.295	0.0827	0.458	0.0883	EW033_RS01595	NZ_LR130515	342295	T	C	snp	missense_variant	EW033_RS01595	essC	type VII secretion protein EssC	S98P	0.111111	9
NZ_LR130515_2443238_T_G	0.214	0.0827	0.426	0.0883		NZ_LR130515	2443238	T	G	snp	missense_variant	EW033_RS00100				0.0714286	14
NZ_LR130515_1555008_G_A	0.0258	0.083	0.644	0.0882	ebh	NZ_LR130515	1555008	G	A	snp	missense_variant	EW033_RS07955	ebh	hyperosmolarity resistance protein Ebh	A3489V	0.5	2	SAUSA300_1327	cell surface protein	SAUSA300_1327
NZ_LR130515_1536588_T_A	0.0413	0.0832	0.55	0.0882	ebh	NZ_LR130515	1536588	T	A	snp	missense_variant	EW033_RS07955	ebh	hyperosmolarity resistance protein Ebh	N9629I	0.2	5	SAUSA300_1327	cell surface protein	SAUSA300_1327
NZ_LR130515_2495227_A_T	0.106	0.0832	-0.715	0.0882		NZ_LR130515	2495227	A	T	snp	missense_variant	EW033_RS13180-EW033_RS13185				0.25	4
NZ_LR130515_2495234_C_G	0.106	0.0832	-0.715	0.0882		NZ_LR130515	2495234	C	G	snp	missense_variant	EW033_RS13180-EW033_RS13185				0.166667	6
NZ_LR130515_1565327_AACCACGCTTGCTG_TAATACACTAGCCA	0.0568	0.0833	0.534	0.0881	ebh	NZ_LR130515	1565327	AACCACGCTTGCTG	TAATACACTAGCCA	complex	missense_variant	EW033_RS07955	ebh	hyperosmolarity resistance protein Ebh	PASVV45LASVL	0.1	10	SAUSA300_1327	cell surface protein	SAUSA300_1327
NZ_LR130515_761209_GCT_ACA	0.165	0.0835	0.822	0.0881	mnhD2	NZ_LR130515	761209	GCT	ACA	complex	missense_variant	EW033_RS03955		Na+/H+ antiporter subunit D	L446Q	0.333333	3	SAUSA300_0613	putative monovalent cation/H+ antiporter subunit D	SAUSA300_0613	SAUSA300_0609-mnhA2-mnhB2-mnhC2-mnhD2-mnhE2-mnhF2-mnhG2
NZ_LR130515_162264_A_G	0.109	0.0837	-0.298	0.088		NZ_LR130515	162264	A	G	snp	missense_variant	EW033_RS00100				0.5	2
NZ_LR130515_451230_G_A	0.0568	0.0837	-0.644	0.088	SAUSA300_0353	NZ_LR130515	451230	G	A	snp	missense_variant	EW033_RS02285		ABC-2 transporter permease	S74N	0.25	4	SAUSA300_0353	hypothetical protein	SAUSA300_0353	SAUSA300_0350-SAUSA300_0351-SAUSA300_0352-SAUSA300_0353
NZ_LR130515_773819_GAT_AATGTA	0.109	0.0837	-0.298	0.088	tagB	NZ_LR130515	773819	GAT	AATGTA	complex	missense_variant	EW033_RS04020		CDP-glycerol glycerophosphotransferase family protein	D257delinsNV	0.5	2	SAUSA300_0626	teichoic acid biosynthesis protein B	tagB	tagG-tagB-tagX
NZ_LR130515_1714605_T_C	0.109	0.0837	-0.298	0.088		NZ_LR130515	1714605	T	C	snp	missense_variant	EW033_RS00100				0.5	2
NZ_LR130515_971368_A_T	0.403	0.0838	0.524	0.088		NZ_LR130515	971368	A	T	snp	missense_variant	EW033_RS00100				0.25	4
NZ_LR130515_200259_GT_TG	0.178	0.0839	0.488	0.088		NZ_LR130515	200259	GT	TG	mnp	missense_variant	EW033_RS00100				0.166667	6
NZ_LR130515_536024_TT_CA	0.235	0.084	0.481	0.088	ssl10	NZ_LR130515	536024	TT	CA	complex	missense_variant	EW033_RS02765		superantigen-like protein SSL10	F113S	0.0909091	11	SAUSA300_0404	superantigen-like protein	SAUSA300_0404
NZ_LR130515_2060457_GTCGCAATCC_ATCGTATTCA	0.0724	0.084	-0.618	0.088	SAUSA300_1871	NZ_LR130515	2060457	GTCGCAATCC	ATCGTATTCA	complex	missense_variant	EW033_RS10715		hypothetical protein	MDC66IEY	0.1	10	SAUSA300_1871	hypothetical protein	SAUSA300_1871
NZ_LR130515_2935391_C_T	0.204	0.0842	0.489	0.0879	SAUSA300_2553	NZ_LR130515	2935391	C	T	snp	missense_variant	EW033_RS15575		NAD(P)-binding protein	S31N	0.166667	6	SAUSA300_2553	precorrin-2 dehydrogenase	SAUSA300_2553
NZ_LR130515_1821074_C_T	0.207	0.0843	-0.772	0.0879	SAUSA300_1637	NZ_LR130515	1821074	C	T	snp	missense_variant	EW033_RS09330		hypothetical protein	V415M	0.333333	3	SAUSA300_1637	hypothetical protein	SAUSA300_1637
NZ_LR130515_872459_TTACTA_ATCTTT	0.171	0.0844	0.313	0.0878	sstA	NZ_LR130515	872459	TTACTA	ATCTTT	complex	missense_variant	EW033_RS04530		ABC transporter permease	LL34IF	0.0294118	34	SAUSA300_0718	iron compound ABC transporter permease	SAUSA300_0718	sstA-sstB-sstC-sstD
NZ_LR130515_2964310_T_A	0.111	0.0845	-0.749	0.0878	manP	NZ_LR130515	2964310	T	A	snp	missense_variant	EW033_RS15715		PTS transporter subunit EIIA	L501H	0.333333	3	SAUSA300_2576	phosphotransferase system, fructose-specific IIABC component	SAUSA300_2576	SAUSA300_2575-manP-pmi
NZ_LR130515_2993323_ATCTATT_CTTTATC	0.424	0.0845	0.535	0.0878	SAUSA300_2593	NZ_LR130515	2993323	ATCTATT	CTTTATC	complex	missense_variant	EW033_RS15810		flavin reductase family protein	D199K	0.166667	6	SAUSA300_2593	hypothetical protein	SAUSA300_2593
NZ_LR130515_3014245_C_T	0.0258	0.0845	-0.581	0.0878		NZ_LR130515	3014245	C	T	snp	missense_variant	EW033_RS15920-EW033_RS15925				0.166667	6
NZ_LR130515_681959_AA_TG	0.38	0.0846	0.469	0.0878		NZ_LR130515	681959	AA	TG	complex	missense_variant	EW033_RS00100				0.166667	6
NZ_LR130515_681969_A_G	0.38	0.0846	0.469	0.0878		NZ_LR130515	681969	A	G	snp	missense_variant	EW033_RS00100				0.1	10
NZ_LR130515_749914_C_T	0.413	0.0847	0.544	0.0877	SAUSA300_0601	NZ_LR130515	749914	C	T	snp	missense_variant	EW033_RS03895		alpha/beta hydrolase	T114M	0.333333	3	SAUSA300_0601	alpha/beta fold family hydrolase	SAUSA300_0601	SAUSA300_0599-SAUSA300_0600-SAUSA300_0601
NZ_LR130515_2368143_GATGTAATGGCG_CATGAAATAGCA	0.0801	0.0848	0.905	0.0877		NZ_LR130515	2368143	GATGTAATGGCG	CATGAAATAGCA	complex	missense_variant	EW033_RS00100				0.333333	3
NZ_LR130515_2592204_A_T	0.191	0.0848	0.642	0.0877		NZ_LR130515	2592204	A	T	snp	missense_variant	EW033_RS13790-EW033_RS13795				0.2	5
NZ_LR130515_152318_G_A	0.0103	0.0849	-1.22	0.0877	SAUSA300_0128	NZ_LR130515	152318	G	A	snp	missense_variant	EW033_RS00770		MFS transporter	E153K	0.5	2	SAUSA300_0128	hypothetical protein	SAUSA300_0128
NZ_LR130515_693829_C_A	0.0103	0.0849	-1.22	0.0877	sdrE	NZ_LR130515	693829	C	A	snp	missense_variant	EW033_RS03565	sdrE	MSCRAMM family adhesin SdrE	T96K	0.5	2	SAUSA300_0548	sdrE protein	sdrE
NZ_LR130515_693853_C_A	0.0103	0.0849	-1.22	0.0877	sdrE	NZ_LR130515	693853	C	A	snp	missense_variant	EW033_RS03565	sdrE	MSCRAMM family adhesin SdrE	A104D	0.5	2	SAUSA300_0548	sdrE protein	sdrE
NZ_LR130515_894353_C_A	0.0103	0.0849	-1.22	0.0877	EW033_RS04635	NZ_LR130515	894353	C	A	snp	missense_variant	EW033_RS04635		hypothetical protein	Y14*	0.333333	3
NZ_LR130515_894559_TTGAAA_T	0.0103	0.0849	-1.22	0.0877		NZ_LR130515	894559	TTGAAA	T	del	missense_variant	EW033_RS00100				0.5	2
NZ_LR130515_930915_A_T	0.0103	0.0849	-1.22	0.0877	EW033_RS04815	NZ_LR130515	930915	A	T	snp	missense_variant	EW033_RS04815		DUF5067 domain-containing protein	F132Y	0.5	2
NZ_LR130515_1091882_T_C	0.0103	0.0849	-1.22	0.0877		NZ_LR130515	1091882	T	C	snp	missense_variant	EW033_RS00100				0.5	2
NZ_LR130515_1439534_G_A	0.0103	0.0849	-1.22	0.0877	sbcC	NZ_LR130515	1439534	G	A	snp	missense_variant	EW033_RS07475		SMC family ATPase	G402D	0.5	2	SAUSA300_1243	exonuclease SbcC	sbcC	sbcD-sbcC
NZ_LR130515_1440244_T_A	0.0103	0.0849	-1.22	0.0877	sbcC	NZ_LR130515	1440244	T	A	snp	missense_variant	EW033_RS07475		SMC family ATPase	L639I	0.5	2	SAUSA300_1243	exonuclease SbcC	sbcC	sbcD-sbcC
NZ_LR130515_1511667_C_T	0.0103	0.0849	-1.22	0.0877		NZ_LR130515	1511667	C	T	snp	missense_variant	EW033_RS00100				0.5	2
NZ_LR130515_1525500_A_T	0.641	0.0849	0.235	0.0877	SAUSA300_1314	NZ_LR130515	1525500	A	T	snp	missense_variant	EW033_RS07885		hypothetical protein	Y74*	0.0384615	26	SAUSA300_1314	hypothetical protein	SAUSA300_1314	SAUSA300_1314-crr-msrB-msrA1
NZ_LR130515_1533215_A_G	0.0103	0.0849	-1.22	0.0877		NZ_LR130515	1533215	A	G	snp	missense_variant	EW033_RS00100				0.5	2
NZ_LR130515_1533592_A_C	0.0103	0.0849	-1.22	0.0877		NZ_LR130515	1533592	A	C	snp	missense_variant	EW033_RS00100				0.5	2
NZ_LR130515_1558933_C_T	0.093	0.0849	0.633	0.0877	ebh	NZ_LR130515	1558933	C	T	snp	missense_variant	EW033_RS07955	ebh	hyperosmolarity resistance protein Ebh	V2181I	0.333333	3	SAUSA300_1327	cell surface protein	SAUSA300_1327
NZ_LR130515_1577533_T_A	0.0103	0.0849	-1.22	0.0877		NZ_LR130515	1577533	T	A	snp	missense_variant	EW033_RS00100				0.5	2
NZ_LR130515_1752952_T_C	0.0103	0.0849	-1.22	0.0877		NZ_LR130515	1752952	T	C	snp	missense_variant	EW033_RS00100				0.125	8
NZ_LR130515_1752986_G_T	0.0103	0.0849	-1.22	0.0877		NZ_LR130515	1752986	G	T	snp	missense_variant	EW033_RS00100				0.5	2
NZ_LR130515_1788329_CAA_TAG	0.0749	0.0849	0.569	0.0877		NZ_LR130515	1788329	CAA	TAG	complex	missense_variant	EW033_RS00100				0.166667	6
NZ_LR130515_1839641_A_ATT	0.0103	0.0849	-1.22	0.0877		NZ_LR130515	1839641	A	ATT	ins	missense_variant	EW033_RS00100				0.333333	3
NZ_LR130515_1940643_T_C	0.0103	0.0849	-1.22	0.0877	SAUSA300_1728	NZ_LR130515	1940643	T	C	snp	missense_variant	EW033_RS09865		aldo/keto reductase	K266R	0.5	2	SAUSA300_1728	aldo/keto reductase family oxidoreductase	SAUSA300_1728
NZ_LR130515_2012933_T_A	0.0103	0.0849	-1.22	0.0877		NZ_LR130515	2012933	T	A	snp	missense_variant	EW033_RS00100				0.5	2
NZ_LR130515_2047430_T_C	0.0103	0.0849	-1.22	0.0877		NZ_LR130515	2047430	T	C	snp	missense_variant	EW033_RS00100				0.5	2
NZ_LR130515_2047443_A_G	0.0103	0.0849	-1.22	0.0877		NZ_LR130515	2047443	A	G	snp	missense_variant	EW033_RS00100				0.25	4
NZ_LR130515_2059826_T_C	0.0103	0.0849	-1.22	0.0877		NZ_LR130515	2059826	T	C	snp	missense_variant	EW033_RS00100				0.5	2
NZ_LR130515_2110619_G_T	0.0103	0.0849	-1.22	0.0877		NZ_LR130515	2110619	G	T	snp	missense_variant	EW033_RS00100				0.5	2
NZ_LR130515_2110653_T_A	0.0103	0.0849	-1.22	0.0877		NZ_LR130515	2110653	T	A	snp	missense_variant	EW033_RS00100				0.5	2
NZ_LR130515_2368597_C_T	0.0103	0.0849	-1.22	0.0877	EW033_RS12545	NZ_LR130515	2368597	C	T	snp	missense_variant	EW033_RS12545		hypothetical protein	H25Y	0.5	2
NZ_LR130515_2377698_AA_T	0.0103	0.0849	-1.22	0.0877		NZ_LR130515	2377698	AA	T	complex	missense_variant	EW033_RS00100				0.5	2
NZ_LR130515_2493785_G_A	0.0103	0.0849	-1.22	0.0877		NZ_LR130515	2493785	G	A	snp	missense_variant	EW033_RS13170-EW033_RS13175				0.5	2
NZ_LR130515_2747598_T_A	0.0103	0.0849	-1.22	0.0877		NZ_LR130515	2747598	T	A	snp	missense_variant	EW033_RS14615-EW033_RS14620				0.5	2
NZ_LR130515_2758536_TGCA_AGCC	0.0103	0.0849	-1.22	0.0877		NZ_LR130515	2758536	TGCA	AGCC	complex	missense_variant	EW033_RS14665-EW033_RS14670				0.125	8
NZ_LR130515_148736_A_C	0.37	0.0851	0.737	0.0876	sbnF	NZ_LR130515	148736	A	C	snp	missense_variant	EW033_RS00745	sbnF	3-(L-alanin-3-ylcarbamoyl)-2-[(2- aminoethylcarbamoyl)methyl]-2-hydroxypropanoate synthase SbnF	K548Q	0.5	2	SAUSA300_0123	IucC family siderophore biosynthesis protein	SAUSA300_0123	sbnA-sbnB-sbnC-sbnD-sbnE-sbnF-sbnG-sbnH-sbnI
NZ_LR130515_154793_TTGG_ATGA	0.37	0.0851	0.737	0.0876	SAUSA300_0131	NZ_LR130515	154793	TTGG	ATGA	complex	missense_variant	EW033_RS00790		sugar transferase	IG14ND	0.333333	3	SAUSA300_0131	putative sugar transferase	SAUSA300_0131	galE-SAUSA300_0131
NZ_LR130515_241297_A_G	0.37	0.0851	0.737	0.0876	SAUSA300_0201	NZ_LR130515	241297	A	G	snp	missense_variant	EW033_RS01150		ABC transporter permease	N138S	0.5	2	SAUSA300_0201	peptide ABC transporter permease	SAUSA300_0201	SAUSA300_0201-SAUSA300_0202-SAUSA300_0203-ggt
NZ_LR130515_249609_AAGTGAC_GACTGAA	0.37	0.0851	0.737	0.0876		NZ_LR130515	249609	AAGTGAC	GACTGAA	complex	missense_variant	EW033_RS00100				0.333333	3
NZ_LR130515_284678_A_G	0.37	0.0851	0.737	0.0876	opp-5A	NZ_LR130515	284678	A	G	snp	missense_variant	EW033_RS01305		ABC transporter substrate-binding protein	V48A	0.5	2	SAUSA300_0231	ABC transporter substrate-binding protein	SAUSA300_0231
NZ_LR130515_286314_A_T	0.37	0.0851	0.737	0.0876	hmp	NZ_LR130515	286314	A	T	snp	missense_variant	EW033_RS01325		nitric oxide dioxygenase	D208E	0.5	2	SAUSA300_0234	putative flavohemoprotein	SAUSA300_0234	SAUSA300_0233-hmp
NZ_LR130515_377193_CAAA_TAAT	0.37	0.0851	0.737	0.0876	gehB	NZ_LR130515	377193	CAAA	TAAT	complex	missense_variant	EW033_RS01790	lip2	YSIRK domain-containing triacylglycerol lipase Lip2/Geh	K136N	0.5	2	SAUSA300_0320	triacylglycerol lipase	SAUSA300_0320
NZ_LR130515_423276_CTATACAGA_TTTAATAGG	0.37	0.0851	0.737	0.0876		NZ_LR130515	423276	CTATACAGA	TTTAATAGG	complex	missense_variant	EW033_RS00100				0.5	2
NZ_LR130515_534784_TTT_CTA	0.251	0.0851	-0.675	0.0876	ssl9	NZ_LR130515	534784	TTT	CTA	complex	missense_variant	EW033_RS02760		superantigen-like protein SSL9	F55Y	0.25	4	SAUSA300_0403	superantigen-like protein	SAUSA300_0403
NZ_LR130515_2466067_T_C	0.111	0.0851	-0.655	0.0876	htsC	NZ_LR130515	2466067	T	C	snp	missense_variant	EW033_RS13040		iron chelate uptake ABC transporter family permease subunit	T43A	0.25	4	SAUSA300_2134	iron compound ABC transporter permease	SAUSA300_2134	htsC-htsB-htsA
NZ_LR130515_2497400_GG_AT	0.0362	0.0851	0.564	0.0876	hysA	NZ_LR130515	2497400	GG	AT	complex	missense_variant	EW033_RS13190	hysA	hyaluronate lyase HysA	G602D	0.2	5	SAUSA300_2161	hyaluronate lyase	hysA
NZ_LR130515_2854773_C_T	0.37	0.0851	0.737	0.0876	SAUSA300_2496	NZ_LR130515	2854773	C	T	snp	missense_variant	EW033_RS15150		D-lactate dehydrogenase	E308K	0.5	2	SAUSA300_2496	D-lactate dehydrogenase	SAUSA300_2496	SAUSA300_2496-SAUSA300_2497
NZ_LR130515_2855860_T_G	0.37	0.0851	0.737	0.0876	SAUSA300_2497	NZ_LR130515	2855860	T	G	snp	missense_variant	EW033_RS15155		aminotransferase class I/II-fold pyridoxal phosphate-dependent enzyme	K338Q	0.5	2	SAUSA300_2497	aminotransferase, class I	SAUSA300_2497	SAUSA300_2496-SAUSA300_2497
NZ_LR130515_2855992_C_T	0.37	0.0851	0.737	0.0876	SAUSA300_2497	NZ_LR130515	2855992	C	T	snp	missense_variant	EW033_RS15155		aminotransferase class I/II-fold pyridoxal phosphate-dependent enzyme	A294T	0.5	2	SAUSA300_2497	aminotransferase, class I	SAUSA300_2497	SAUSA300_2496-SAUSA300_2497
NZ_LR130515_2858486_G_T	0.37	0.0851	0.737	0.0876	crtN	NZ_LR130515	2858486	G	T	snp	missense_variant	EW033_RS15160	crtI	phytoene desaturase	H107Q	0.333333	3	SAUSA300_2498	squalene synthase	crtN	crtN-crtM-crtQ-crtP-crtO
NZ_LR130515_2859011_C_T	0.37	0.0851	0.737	0.0876	crtM	NZ_LR130515	2859011	C	T	snp	missense_variant	EW033_RS15165		phytoene/squalene synthase family protein	R224Q	0.333333	3	SAUSA300_2499	squalene desaturase	crtM	crtN-crtM-crtQ-crtP-crtO
NZ_LR130515_2859148_T_G	0.37	0.0851	0.737	0.0876	crtM	NZ_LR130515	2859148	T	G	snp	missense_variant	EW033_RS15165		phytoene/squalene synthase family protein	E178D	0.5	2	SAUSA300_2499	squalene desaturase	crtM	crtN-crtM-crtQ-crtP-crtO
NZ_LR130515_2859912_CTGTTAA_GTGCTAC	0.37	0.0851	0.737	0.0876	crtQ	NZ_LR130515	2859912	CTGTTAA	GTGCTAC	complex	missense_variant	EW033_RS15170		glycosyltransferase family 2 protein	LTV310VAL	0.5	2	SAUSA300_2500	glycosyl transferase	SAUSA300_2500	crtN-crtM-crtQ-crtP-crtO
NZ_LR130515_2859927_C_T	0.37	0.0851	0.737	0.0876	crtQ	NZ_LR130515	2859927	C	T	snp	missense_variant	EW033_RS15170		glycosyltransferase family 2 protein	G307R	0.5	2	SAUSA300_2500	glycosyl transferase	SAUSA300_2500	crtN-crtM-crtQ-crtP-crtO
NZ_LR130515_2870120_G_A	0.37	0.0851	0.737	0.0876		NZ_LR130515	2870120	G	A	snp	missense_variant	EW033_RS15210-EW033_RS15215				0.5	2
NZ_LR130515_2870305_C_T	0.37	0.0851	0.737	0.0876	EW033_RS15215	NZ_LR130515	2870305	C	T	snp	missense_variant	EW033_RS15215		hypothetical protein	R45C	0.5	2
NZ_LR130515_2879011_C_T	0.37	0.0851	0.737	0.0876	SAUSA300_2521	NZ_LR130515	2879011	C	T	snp	missense_variant	EW033_RS15270		NAD(P)-binding domain-containing protein	D244N	0.333333	3	SAUSA300_2521	hypothetical protein	SAUSA300_2521	SAUSA300_2519-SAUSA300_2520-SAUSA300_2521
NZ_LR130515_2901268_TC_CT	0.37	0.0851	0.737	0.0876	SAUSA300_2525	NZ_LR130515	2901268	TC	CT	mnp	missense_variant	EW033_RS15400		fructosamine kinase family protein	D288S	0.5	2	SAUSA300_2525	hypothetical protein	SAUSA300_2525
NZ_LR130515_2986490_T_C	0.0827	0.0851	-0.867	0.0876	sasA	NZ_LR130515	2986490	T	C	snp	missense_variant	EW033_RS15780	sasA	serine-rich repeat glycoprotein adhesin SasA	N1147S	0.333333	3	SAUSA300_2589	cell wall anchor domain-containing protein	SAUSA300_2589
NZ_LR130515_1245712_G_A	0.0904	0.0853	0.447	0.0876		NZ_LR130515	1245712	G	A	snp	missense_variant	EW033_RS00100				0.0833333	12
NZ_LR130515_2406288_C_T	0.0491	0.0853	-0.704	0.0876		NZ_LR130515	2406288	C	T	snp	missense_variant	EW033_RS00100				0.333333	3
NZ_LR130515_2723411_T_C	0.0491	0.0853	-0.704	0.0876		NZ_LR130515	2723411	T	C	snp	missense_variant	EW033_RS14485-EW033_RS14495				0.333333	3
NZ_LR130515_2723491_AT_A	0.0491	0.0853	-0.704	0.0876		NZ_LR130515	2723491	AT	A	del	missense_variant	EW033_RS14485-EW033_RS14495				0.333333	3
NZ_LR130515_648843_T_C	0.403	0.0854	0.466	0.0876		NZ_LR130515	648843	T	C	snp	missense_variant	EW033_RS00100				0.142857	7
NZ_LR130515_137219_T_G	0.481	0.0855	0.655	0.0875		NZ_LR130515	137219	T	G	snp	missense_variant	EW033_RS00100				0.333333	3
NZ_LR130515_339523_A_C	0.481	0.0855	0.655	0.0875	esaA	NZ_LR130515	339523	A	C	snp	missense_variant	EW033_RS01575	esaA	type VII secretion protein EsaA	N864H	0.25	4	SAUSA300_0279	hypothetical protein	SAUSA300_0279	esaA-essA-esaB-essB-essC-esxC-esxB-esaE-esxD-esaD-esaG
NZ_LR130515_863981_T_A	0.0698	0.0856	-0.593	0.0875	EW033_RS04475	NZ_LR130515	863981	T	A	snp	missense_variant	EW033_RS04475		hypothetical protein	S33T	0.142857	7
NZ_LR130515_931739_T_G	0.0801	0.0856	0.669	0.0875		NZ_LR130515	931739	T	G	snp	missense_variant	EW033_RS00100				0.125	8
NZ_LR130515_1036853_A_C	0.372	0.0856	0.283	0.0875	SAUSA300_0876	NZ_LR130515	1036853	A	C	snp	missense_variant	EW033_RS05430		acetyltransferase	Q432H	0.142857	7	SAUSA300_0876	hypothetical protein	SAUSA300_0876
NZ_LR130515_1863582_G_A	0.168	0.0857	0.59	0.0875	serA	NZ_LR130515	1863582	G	A	snp	missense_variant	EW033_RS09520		phosphoglycerate dehydrogenase	D84N	0.5	2	SAUSA300_1670	D-3-phosphoglycerate dehydrogenase	serA	SAUSA300_1669-serA
NZ_LR130515_2348236_TTATTTG_ATTTGCA	0.0698	0.0857	0.607	0.0875	SAUSA300_2030	NZ_LR130515	2348236	TTATTTG	ATTTGCA	complex	missense_variant	EW033_RS12450		PH domain-containing protein	ANK511VQI	0.2	5	SAUSA300_2030	hypothetical protein	SAUSA300_2030	alr-acpS-SAUSA300_2029-SAUSA300_2030-SAUSA300_2031
NZ_LR130515_2377933_TC_T	0.171	0.0859	-0.529	0.0874		NZ_LR130515	2377933	TC	T	del	missense_variant	EW033_RS00100				0.142857	7
NZ_LR130515_1270277_CG_TA	0.22	0.0861	-0.504	0.0874		NZ_LR130515	1270277	CG	TA	complex	missense_variant	EW033_RS00100				0.0625	16
NZ_LR130515_3003498_C_T	0.429	0.0861	0.562	0.0874	gehA	NZ_LR130515	3003498	C	T	snp	missense_variant	EW033_RS15870	lip1	YSIRK domain-containing triacylglycerol lipase Lip1	S425N	0.2	5	SAUSA300_2603	triacylglycerol lipase	lip
NZ_LR130515_1811967_C_T	0.512	0.0862	0.544	0.0873	EW033_RS09290	NZ_LR130515	1811967	C	T	snp	missense_variant	EW033_RS09290		hypothetical protein	Ter41Ter	0.2	5
NZ_LR130515_2037140_C_G	0.584	0.0862	0.57	0.0873		NZ_LR130515	2037140	C	G	snp	missense_variant	EW033_RS00100				0.2	5
NZ_LR130515_122764_G_A	0.419	0.0864	0.6	0.0873	SAUSA300_0104	NZ_LR130515	122764	G	A	snp	missense_variant	EW033_RS00655		helix-turn-helix domain-containing protein	A180T	0.25	4	SAUSA300_0104	AraC family transcriptional regulator	SAUSA300_0104
NZ_LR130515_146748_AGAAGTG_CGACGTA	0.535	0.0864	0.59	0.0873	sbnE	NZ_LR130515	146748	AGAAGTG	CGACGTA	complex	missense_variant	EW033_RS00740	sbnE	L-2,3-diaminopropanoate--citrate ligase SbnE	E434D	0.333333	3	SAUSA300_0122	IucA/IucC family siderophore biosynthesis protein	SAUSA300_0122	sbnA-sbnB-sbnC-sbnD-sbnE-sbnF-sbnG-sbnH-sbnI
NZ_LR130515_146759_A_T	0.535	0.0864	0.59	0.0873	sbnE	NZ_LR130515	146759	A	T	snp	missense_variant	EW033_RS00740	sbnE	L-2,3-diaminopropanoate--citrate ligase SbnE	Y437F	0.25	4	SAUSA300_0122	IucA/IucC family siderophore biosynthesis protein	SAUSA300_0122	sbnA-sbnB-sbnC-sbnD-sbnE-sbnF-sbnG-sbnH-sbnI
NZ_LR130515_269660_G_A	0.535	0.0864	0.59	0.0873	SAUSA300_0223	NZ_LR130515	269660	G	A	snp	missense_variant	EW033_RS01255		complement inhibitor SCIN family protein	H61Y	0.25	4	SAUSA300_0223	hypothetical protein	SAUSA300_0223
NZ_LR130515_2814088_T_A	0.623	0.0864	0.422	0.0873		NZ_LR130515	2814088	T	A	snp	missense_variant	EW033_RS14940-EW033_RS14945				0.111111	9
NZ_LR130515_1840145_A_T	0.0543	0.0865	-0.648	0.0873	dnaE	NZ_LR130515	1840145	A	T	snp	missense_variant	EW033_RS09395		DNA polymerase III subunit alpha	L1040I	0.333333	3	SAUSA300_1649	DNA polymerase III, alpha subunit	dnaE	dnaE-pde2
NZ_LR130515_1840465_G_A	0.0543	0.0865	-0.648	0.0873	dnaE	NZ_LR130515	1840465	G	A	snp	missense_variant	EW033_RS09395		DNA polymerase III subunit alpha	T933I	0.333333	3	SAUSA300_1649	DNA polymerase III, alpha subunit	dnaE	dnaE-pde2
NZ_LR130515_1840894_A_T	0.0543	0.0865	-0.648	0.0873	dnaE	NZ_LR130515	1840894	A	T	snp	missense_variant	EW033_RS09395		DNA polymerase III subunit alpha	F790Y	0.333333	3	SAUSA300_1649	DNA polymerase III, alpha subunit	dnaE	dnaE-pde2
NZ_LR130515_2414187_ATATATCC_GTATGTCT	0.173	0.0866	-0.761	0.0872		NZ_LR130515	2414187	ATATATCC	GTATGTCT	complex	missense_variant	EW033_RS00100				0.2	5
NZ_LR130515_694292_TG_CA	0.0129	0.0869	-0.821	0.0871	sdrE	NZ_LR130515	694292	TG	CA	complex	missense_variant	EW033_RS03565	sdrE	MSCRAMM family adhesin SdrE	V251I	0.333333	3	SAUSA300_0548	sdrE protein	sdrE
NZ_LR130515_1154999_A_G	0.0672	0.0871	0.676	0.0871		NZ_LR130515	1154999	A	G	snp	missense_variant	EW033_RS00100				0.25	4
NZ_LR130515_199831_T_A	0.32	0.0873	0.551	0.087		NZ_LR130515	199831	T	A	snp	missense_variant	EW033_RS00100				0.25	4
NZ_LR130515_2839552_C_T	0.357	0.0874	-0.54	0.087	SAUSA300_2485	NZ_LR130515	2839552	C	T	snp	missense_variant	EW033_RS15085		methylated-DNA--[protein]-cysteine S-methyltransferase	R47K	0.25	4	SAUSA300_2485	methylated DNA-protein cysteine methyltransferase	SAUSA300_2485
NZ_LR130515_2993225_T_C	0.656	0.0874	0.7	0.087		NZ_LR130515	2993225	T	C	snp	missense_variant	EW033_RS15805-EW033_RS15810				0.5	2
NZ_LR130515_2997052_A_G	0.656	0.0874	0.7	0.087	cap1A	NZ_LR130515	2997052	A	G	snp	missense_variant	EW033_RS15835		capsular polysaccharide biosynthesis protein CapA	L98S	0.5	2	SAUSA300_2598	capsular polysaccharide biosynthesis protein Cap1A	cap1A	cap1C-cap1B-cap1A
NZ_LR130515_860028_CGTAACACCAA_AGGGGCACGCC	0.256	0.0876	-0.591	0.087		NZ_LR130515	860028	CGTAACACCAA	AGGGGCACGCC	complex	missense_variant	EW033_RS00100				0.166667	6
NZ_LR130515_1083063_A_AG	0.633	0.0877	0.453	0.0869		NZ_LR130515	1083063	A	AG	ins	missense_variant	EW033_RS00100				0.2	5
NZ_LR130515_271225_ACAGA_GCGGC	0.147	0.0878	0.42	0.0869	EW033_RS01260	NZ_LR130515	271225	ACAGA	GCGGC	complex	missense_variant	EW033_RS01260	coa	staphylocoagulase	NR399SG	0.111111	9
NZ_LR130515_2546319_T_A	0.124	0.0878	0.598	0.0869	EW033_RS13520	NZ_LR130515	2546319	T	A	snp	missense_variant	EW033_RS13520		hypothetical protein	Y42N	0.2	5
NZ_LR130515_523697_G_A	0.333	0.0879	-0.397	0.0869		NZ_LR130515	523697	G	A	snp	missense_variant	EW033_RS00100				0.0666667	15
NZ_LR130515_1101738_CT_C	0.0853	0.088	-0.713	0.0868		NZ_LR130515	1101738	CT	C	del	missense_variant	EW033_RS00100				0.2	5
NZ_LR130515_143427_CA_TG	0.403	0.0881	0.64	0.0868	sbnC	NZ_LR130515	143427	CA	TG	mnp	missense_variant	EW033_RS00730	sbnC	staphyloferrin B biosynthesis protein SbnC	T324M	0.2	5	SAUSA300_0120	IucC family siderophore biosynthesis protein	sbnC	sbnA-sbnB-sbnC-sbnD-sbnE-sbnF-sbnG-sbnH-sbnI
NZ_LR130515_1480802_AGCCGGTATAATT_TGACGGCATTATC	0.0181	0.0881	0.637	0.0868	opp-2C	NZ_LR130515	1480802	AGCCGGTATAATT	TGACGGCATTATC	complex	missense_variant	EW033_RS07660		ABC transporter permease	IPA187MPS	0.2	5	SAUSA300_1275	peptide ABC transporter permease	SAUSA300_1275	opp-2F-opp-2D-opp-2C-opp-2B
NZ_LR130515_2903981_AGGGC_GGGAT	0.297	0.0882	0.483	0.0868		NZ_LR130515	2903981	AGGGC	GGGAT	complex	missense_variant	EW033_RS15410-EW033_RS15415				0.142857	7
NZ_LR130515_2903991_T_A	0.297	0.0882	0.483	0.0868		NZ_LR130515	2903991	T	A	snp	missense_variant	EW033_RS15410-EW033_RS15415				0.142857	7
NZ_LR130515_1565636_C_T	0.0853	0.0883	0.819	0.0868		NZ_LR130515	1565636	C	T	snp	missense_variant	EW033_RS00100				0.25	4
NZ_LR130515_296594_G_A	0.45	0.0885	0.614	0.0867	SAUSA300_0242	NZ_LR130515	296594	G	A	snp	missense_variant	EW033_RS01380		zinc-binding dehydrogenase	E98K	0.25	4	SAUSA300_0242	sorbitol dehydrogenase	gutB	SAUSA300_0241-SAUSA300_0242-SAUSA300_0243-SAUSA300_0244
NZ_LR130515_2912142_A_G	0.194	0.0885	0.451	0.0867		NZ_LR130515	2912142	A	G	snp	missense_variant	EW033_RS15460-EW033_RS15465				0.111111	9
NZ_LR130515_1704934_T_G	0.434	0.0886	0.471	0.0867	rsmE	NZ_LR130515	1704934	T	G	snp	missense_variant	EW033_RS08705		16S rRNA (uracil(1498)-N(3))-methyltransferase	E62A	0.142857	7	SAUSA300_1537	16S ribosomal RNA methyltransferase RsmE	SAUSA300_1537	mtaB-rsmE-prmA-dnaJ-dnaK-grpE-hrcA
NZ_LR130515_2438543_T_C	0.214	0.0886	0.72	0.0867	fmtB	NZ_LR130515	2438543	T	C	snp	missense_variant	EW033_RS12905		DUF1542 domain-containing protein	N1552D	0.142857	7	SAUSA300_2109	truncated FmtB protein	fmtB
NZ_LR130515_2903951_G_A	0.367	0.0886	0.653	0.0867		NZ_LR130515	2903951	G	A	snp	missense_variant	EW033_RS15410-EW033_RS15415				0.333333	3
NZ_LR130515_1329430_G_A	0.155	0.0887	0.507	0.0867		NZ_LR130515	1329430	G	A	snp	missense_variant	EW033_RS00100				0.2	5
NZ_LR130515_2814743_TTTGC_CTTGG	0.119	0.0887	-0.778	0.0867	SAUSA300_2464	NZ_LR130515	2814743	TTTGC	CTTGG	complex	missense_variant	EW033_RS14945		HAD family hydrolase	KQS96NQG	0.333333	3	SAUSA300_2464	HAD superfamily hydrolase	SAUSA300_2464
NZ_LR130515_2986866_C_A	0.457	0.0888	0.577	0.0866	sasA	NZ_LR130515	2986866	C	A	snp	missense_variant	EW033_RS15780	sasA	serine-rich repeat glycoprotein adhesin SasA	A1022S	0.166667	6	SAUSA300_2589	cell wall anchor domain-containing protein	SAUSA300_2589
NZ_LR130515_2856414_T_G	0.292	0.0889	0.513	0.0866	SAUSA300_2497	NZ_LR130515	2856414	T	G	snp	missense_variant	EW033_RS15155		aminotransferase class I/II-fold pyridoxal phosphate-dependent enzyme	K153T	0.2	5	SAUSA300_2497	aminotransferase, class I	SAUSA300_2497	SAUSA300_2496-SAUSA300_2497
NZ_LR130515_2729407_C_T	0.196	0.0891	0.566	0.0865		NZ_LR130515	2729407	C	T	snp	missense_variant	EW033_RS14520-EW033_RS14525				0.333333	3
NZ_LR130515_1482312_CATC_AATT	0.0181	0.0894	-0.622	0.0865	opp-2B	NZ_LR130515	1482312	CATC	AATT	complex	missense_variant	EW033_RS07665		ABC transporter permease	M12I	0.125	8	SAUSA300_1276	oligopeptide permease, channel-forming protein	opp-2B	opp-2F-opp-2D-opp-2C-opp-2B
NZ_LR130515_2940285_C_A	0.416	0.0894	0.461	0.0865	SAUSA300_2556	NZ_LR130515	2940285	C	A	snp	missense_variant	EW033_RS15610		ABC transporter permease	K491N	0.142857	7	SAUSA300_2556	ABC transporter protein	SAUSA300_2556	SAUSA300_2556-SAUSA300_2557-nsaS-nsaR-SAUSA300_2560
NZ_LR130515_1019584_G_A	0.0749	0.0895	0.875	0.0864		NZ_LR130515	1019584	G	A	snp	missense_variant	EW033_RS00100				0.333333	3
NZ_LR130515_1753187_C_T	0.0749	0.0895	0.875	0.0864	SAUSA300_1581	NZ_LR130515	1753187	C	T	snp	missense_variant	EW033_RS08960		hypothetical protein	M4I	0.333333	3	SAUSA300_1581	hypothetical protein	SAUSA300_1581	SAUSA300_1581-csbD
NZ_LR130515_2160394_CTG_TTA	0.0749	0.0895	0.875	0.0864	lukH	NZ_LR130515	2160394	CTG	TTA	complex	missense_variant	EW033_RS11380	lukH	bi-component leukocidin LukGH subunit H	R303K	0.25	4	SAUSA300_1975	Aerolysin/leukocidin family protein	SAUSA300_1975	lukG-lukH
NZ_LR130515_426823_A_T	0.465	0.0898	0.613	0.0863	SAUSA300_0326	NZ_LR130515	426823	A	T	snp	missense_variant	EW033_RS02145		protein-ADP-ribose hydrolase	Q201H	0.2	5	SAUSA300_0326	hypothetical protein	SAUSA300_0326	SAUSA300_0324-gcvH-L-SAUSA300_0326-sirTM-lplA2
NZ_LR130515_1191248_ATGG_TTGT	0.176	0.0898	0.535	0.0864		NZ_LR130515	1191248	ATGG	TTGT	complex	missense_variant	EW033_RS00100				0.166667	6
NZ_LR130515_849169_A_AAAATGAACGT	0.0491	0.0899	-0.539	0.0863		NZ_LR130515	849169	A	AAAATGAACGT	ins	missense_variant	EW033_RS00100				0.125	8
NZ_LR130515_523357_T_C	0.0775	0.09	0.814	0.0863	SAUSA300_0392	NZ_LR130515	523357	T	C	snp	missense_variant	EW033_RS02700		hypothetical protein	M1?	0.2	5	SAUSA300_0392	hypothetical protein	SAUSA300_0392
NZ_LR130515_909141_T_G	0.0775	0.09	0.814	0.0863		NZ_LR130515	909141	T	G	snp	missense_variant	EW033_RS00100				0.333333	3
NZ_LR130515_1215684_C_T	0.0775	0.09	0.814	0.0863		NZ_LR130515	1215684	C	T	snp	missense_variant	EW033_RS00100				0.333333	3
NZ_LR130515_797429_G_A	0.194	0.0901	0.546	0.0863	vraG	NZ_LR130515	797429	G	A	snp	missense_variant	EW033_RS04140		FtsX-like permease family protein	E494K	0.25	4	SAUSA300_0648	ABC transporter permease	SAUSA300_0648	vraF-vraG
NZ_LR130515_1524616_TTTAC_CTTAT	0.101	0.0902	-0.785	0.0863	ctpA	NZ_LR130515	1524616	TTTAC	CTTAT	complex	missense_variant	EW033_RS07880		S41 family peptidase	G230D	0.2	5	SAUSA300_1313	carboxyl-terminal protease	ctpA
NZ_LR130515_1877867_G_A	0.238	0.0902	-0.486	0.0862		NZ_LR130515	1877867	G	A	snp	missense_variant	EW033_RS00100				0.125	8
NZ_LR130515_3036265_ACCGTT_TCATTC	0.207	0.0902	0.334	0.0862	SAUSA300_2635	NZ_LR130515	3036265	ACCGTT	TCATTC	complex	missense_variant	EW033_RS16020	vraH	peptide resistance ABC transporter activity modulator VraH	TV36SF	0.0526316	19	SAUSA300_2635	hypothetical protein	SAUSA300_2635	vraD-vraE-SAUSA300_2635-SAUSA300_2636
NZ_LR130515_23327_G_A	0.393	0.0903	-0.403	0.0862		NZ_LR130515	23327	G	A	snp	missense_variant	EW033_RS00095-EW033_RS00100				0.142857	7
NZ_LR130515_155982_G_A	0.111	0.0903	0.588	0.0862	SAUSA300_0132	NZ_LR130515	155982	G	A	snp	missense_variant	EW033_RS00795		glycosyltransferase family 4 protein	V111I	0.5	2	SAUSA300_0132	glycosyl transferase, group 1 family protein	SAUSA300_0132	SAUSA300_0132-SAUSA300_0133-SAUSA300_0134
NZ_LR130515_156073_G_T	0.111	0.0903	0.588	0.0862	SAUSA300_0132	NZ_LR130515	156073	G	T	snp	missense_variant	EW033_RS00795		glycosyltransferase family 4 protein	R141L	0.5	2	SAUSA300_0132	glycosyl transferase, group 1 family protein	SAUSA300_0132	SAUSA300_0132-SAUSA300_0133-SAUSA300_0134
NZ_LR130515_220414_AGCACTG_GGTGCTA	0.111	0.0903	0.588	0.0862	argJ	NZ_LR130515	220414	AGCACTG	GGTGCTA	complex	missense_variant	EW033_RS01070	argJ	bifunctional glutamate N-acetyltransferase/amino-acid acetyltransferase ArgJ	A188T	0.25	4	SAUSA300_0185	bifunctional ornithine acetyltransferase/N-acetylglutamate synthase protein	argJ	argB-argJ-argC-argD
NZ_LR130515_272541_TCC_CCCGCTTCAACTTCAACTG	0.111	0.0903	0.588	0.0862		NZ_LR130515	272541	TCC	CCCGCTTCAACTTCAACTG	complex	missense_variant	EW033_RS00100				0.1	10
NZ_LR130515_358017_GTAT_ATAG	0.111	0.0903	0.588	0.0862		NZ_LR130515	358017	GTAT	ATAG	complex	missense_variant	EW033_RS00100				0.5	2
NZ_LR130515_426276_G_A	0.111	0.0903	0.588	0.0862	SAUSA300_0326	NZ_LR130515	426276	G	A	snp	missense_variant	EW033_RS02145		protein-ADP-ribose hydrolase	R19H	0.5	2	SAUSA300_0326	hypothetical protein	SAUSA300_0326	SAUSA300_0324-gcvH-L-SAUSA300_0326-sirTM-lplA2
NZ_LR130515_2385238_T_C	0.0439	0.0903	0.519	0.0862	mnaA	NZ_LR130515	2385238	T	C	snp	missense_variant	EW033_RS12655		UDP-N-acetylglucosamine 2-epimerase (non-hydrolyzing)	Q326R	0.0909091	11	SAUSA300_2065	UDP-GlcNAc 2-epimerase	SAUSA300_2065	mnaA-upp-glyA-SAUSA300_2068
NZ_LR130515_880147_G_A	0.0853	0.0904	-0.999	0.0862		NZ_LR130515	880147	G	A	snp	missense_variant	EW033_RS00100				0.5	2
NZ_LR130515_1886370_G_A	0.0853	0.0904	-0.999	0.0862	EW033_RS09615	NZ_LR130515	1886370	G	A	snp	missense_variant	EW033_RS09615		hypothetical protein	P21L	0.5	2
NZ_LR130515_2716336_ATTT_TTTA	0.0853	0.0904	-0.999	0.0862	SAUSA300_2379	NZ_LR130515	2716336	ATTT	TTTA	complex	missense_variant	EW033_RS14460		multidrug effflux MFS transporter	F110L	0.5	2	SAUSA300_2379	putative transporter protein	SAUSA300_2379
NZ_LR130515_1879682_G_A	0.0362	0.0906	-0.745	0.0862		NZ_LR130515	1879682	G	A	snp	missense_variant	EW033_RS00100				0.5	2
NZ_LR130515_2693803_A_C	0.393	0.0907	0.44	0.0861	mdeA	NZ_LR130515	2693803	A	C	snp	missense_variant	EW033_RS14325	mdeA	multidrug efflux MFS transporter MdeA	N327K	0.111111	9	SAUSA300_2360	multidrug resistance protein	SAUSA300_2360
NZ_LR130515_649001_C_T	0.307	0.091	0.407	0.086		NZ_LR130515	649001	C	T	snp	missense_variant	EW033_RS00100				0.0833333	12
NZ_LR130515_704228_G_A	0.116	0.091	-0.664	0.086	hxlB	NZ_LR130515	704228	G	A	snp	missense_variant	EW033_RS03605	hxlB	6-phospho-3-hexuloisomerase	E37K	0.25	4	SAUSA300_0556	SIS domain-containing protein	SAUSA300_0556	nagB-hxlA-hxlB
NZ_LR130515_1954956_A_G	0.54	0.091	-0.433	0.086	SAUSA300_1744	NZ_LR130515	1954956	A	G	snp	missense_variant	EW033_RS09940		hypothetical protein	K89E	0.25	4	SAUSA300_1744	hypothetical protein	SAUSA300_1744
NZ_LR130515_2602632_AGAC_GGAA	0.0698	0.0911	0.591	0.086	SAUSA300_2274	NZ_LR130515	2602632	AGAC	GGAA	complex	missense_variant	EW033_RS13850		hypothetical protein	RL120LP	0.111111	9	SAUSA300_2274	hypothetical protein	SAUSA300_2274
NZ_LR130515_2602646_TATACTGATT_AAAATTAATA	0.0698	0.0911	0.591	0.086	SAUSA300_2274	NZ_LR130515	2602646	TATACTGATT	AAAATTAATA	complex	missense_variant	EW033_RS13850		hypothetical protein	SI115NF	0.166667	6	SAUSA300_2274	hypothetical protein	SAUSA300_2274
NZ_LR130515_1069242_A_T	0.0801	0.0913	-0.896	0.086		NZ_LR130515	1069242	A	T	snp	missense_variant	EW033_RS00100				0.333333	3
NZ_LR130515_3020422_T_C	0.289	0.0914	-0.427	0.0859	drp35	NZ_LR130515	3020422	T	C	snp	missense_variant	EW033_RS15955		SMP-30/gluconolactonase/LRE family protein	T166A	0.25	4	SAUSA300_2621	hypothetical protein	SAUSA300_2621
NZ_LR130515_2923144_G_A	0.45	0.0915	0.488	0.0859		NZ_LR130515	2923144	G	A	snp	missense_variant	EW033_RS15510-EW033_RS15515				0.142857	7
NZ_LR130515_2965795_AGCTAT_TGATAG	0.101	0.0915	-0.705	0.0859		NZ_LR130515	2965795	AGCTAT	TGATAG	complex	missense_variant	EW033_RS15720-EW033_RS15725				0.25	4
NZ_LR130515_2965808_A_G	0.101	0.0915	-0.705	0.0859		NZ_LR130515	2965808	A	G	snp	missense_variant	EW033_RS15720-EW033_RS15725				0.333333	3
NZ_LR130515_3008814_AAATG_GAATA	0.101	0.0915	-0.705	0.0859	hisB	NZ_LR130515	3008814	AAATG	GAATA	complex	missense_variant	EW033_RS15895	hisB	imidazoleglycerol-phosphate dehydratase HisB	S95P	0.5	2	SAUSA300_2609	imidazoleglycerol-phosphate dehydratase	hisB	hisI-hisF-hisA-hisH-hisB-SAUSA300_2610-hisD-hisG-hisZ
NZ_LR130515_1933600_G_T	0.158	0.0916	0.63	0.0859	sigS	NZ_LR130515	1933600	G	T	snp	missense_variant	EW033_RS09820		RNA polymerase sigma factor	K50N	0.333333	3	SAUSA300_1722	hypothetical protein	SAUSA300_1722
NZ_LR130515_2446819_C_T	0.0594	0.0916	-0.511	0.0859	rocF	NZ_LR130515	2446819	C	T	snp	missense_variant	EW033_RS12925	rocF	arginase	V293I	0.0909091	11	SAUSA300_2114	arginase	rocF
NZ_LR130515_1439546_G_C	0.0827	0.0917	0.586	0.0859	sbcC	NZ_LR130515	1439546	G	C	snp	missense_variant	EW033_RS07475		SMC family ATPase	G406A	0.111111	9	SAUSA300_1243	exonuclease SbcC	sbcC	sbcD-sbcC
NZ_LR130515_2814747_C_G	0.406	0.0917	0.51	0.0858	SAUSA300_2464	NZ_LR130515	2814747	C	G	snp	missense_variant	EW033_RS14945		HAD family hydrolase	K96N	0.166667	6	SAUSA300_2464	HAD superfamily hydrolase	SAUSA300_2464
NZ_LR130515_3008338_C_T	0.377	0.0917	0.643	0.0858	hisH	NZ_LR130515	3008338	C	T	snp	missense_variant	EW033_RS15890	hisH	imidazole glycerol phosphate synthase subunit HisH	D62N	0.25	4	SAUSA300_2608	imidazole glycerol phosphate synthase subunit HisH	hisH	hisI-hisF-hisA-hisH-hisB-SAUSA300_2610-hisD-hisG-hisZ
NZ_LR130515_206173_A_G	0.282	0.0918	0.481	0.0858		NZ_LR130515	206173	A	G	snp	missense_variant	EW033_RS00100				0.166667	6
NZ_LR130515_206179_T_A	0.282	0.0918	0.481	0.0858		NZ_LR130515	206179	T	A	snp	missense_variant	EW033_RS00100				0.166667	6
NZ_LR130515_210517_T_A	0.217	0.092	0.499	0.0858	ausA	NZ_LR130515	210517	T	A	snp	missense_variant	EW033_RS01050		non-ribosomal peptide synthetase	L165I	0.2	5	SAUSA300_0181	non-ribosomal peptide synthetase	SAUSA300_0181	ausA-SAUSA300_0182
NZ_LR130515_210624_A_T	0.217	0.092	0.499	0.0858	ausA	NZ_LR130515	210624	A	T	snp	missense_variant	EW033_RS01050		non-ribosomal peptide synthetase	L200F	0.2	5	SAUSA300_0181	non-ribosomal peptide synthetase	SAUSA300_0181	ausA-SAUSA300_0182
NZ_LR130515_681463_CGAC_TGAA	0.0517	0.0921	-0.523	0.0858	SAUSA300_0540	NZ_LR130515	681463	CGAC	TGAA	complex	missense_variant	EW033_RS03520		HAD family hydrolase	D81E	0.0909091	11	SAUSA300_0540	HAD family hydrolase	SAUSA300_0540
NZ_LR130515_1954780_G_A	0.512	0.0921	-0.365	0.0858	SAUSA300_1744	NZ_LR130515	1954780	G	A	snp	missense_variant	EW033_RS09940		hypothetical protein	S30N	0.0909091	11	SAUSA300_1744	hypothetical protein	SAUSA300_1744
NZ_LR130515_1055618_TTG_ATC	0.0207	0.0924	-0.699	0.0857	opp-3A	NZ_LR130515	1055618	TTG	ATC	complex	missense_variant	EW033_RS05515		peptide ABC transporter substrate-binding protein	FE431YQ	0.25	4	SAUSA300_0891	oligopeptide ABC transporter substrate-binding protein	oppA	opp-3B-opp-3C-opp-3D-opp-3F-opp-3A
NZ_LR130515_1536439_A_T	0.0207	0.0925	0.675	0.0856	ebh	NZ_LR130515	1536439	A	T	snp	missense_variant	EW033_RS07955	ebh	hyperosmolarity resistance protein Ebh	L9679I	0.166667	6	SAUSA300_1327	cell surface protein	SAUSA300_1327
NZ_LR130515_1862147_T_C	0.0129	0.0925	-0.676	0.0857		NZ_LR130515	1862147	T	C	snp	missense_variant	EW033_RS00100				0.333333	3
NZ_LR130515_2404015_T_C	0.0155	0.0925	0.828	0.0856	SAUSA300_2083	NZ_LR130515	2404015	T	C	snp	missense_variant	EW033_RS12750		GNAT family N-acetyltransferase	D25G	0.5	2	SAUSA300_2083	acetyltransferase	SAUSA300_2083
NZ_LR130515_1235398_A_G	0.455	0.0926	0.388	0.0856	hla	NZ_LR130515	1235398	A	G	snp	missense_variant	EW033_RS06475		beta-channel forming cytolysin	I301T	0.0714286	14	SAUSA300_1058	alpha-hemolysin	SAUSA300_1058
NZ_LR130515_2372694_TTAAGTAATGG_GTAAATAGTGA	0.245	0.0926	-0.462	0.0856	tenA	NZ_LR130515	2372694	TTAAGTAATGG	GTAAATAGTGA	complex	missense_variant	EW033_RS12570	tenA	thiaminase II	K42Q	0.2	5	SAUSA300_2050	TENA/THI-4 family protein	SAUSA300_2050	thiE-thiM-thiD-tenA
NZ_LR130515_2827175_T_C	0.217	0.0926	0.682	0.0856		NZ_LR130515	2827175	T	C	snp	missense_variant	EW033_RS15020-EW033_RS15025				0.25	4
NZ_LR130515_208592_A_G	0.315	0.0927	0.479	0.0856	SAUSA300_0180	NZ_LR130515	208592	A	G	snp	missense_variant	EW033_RS01045		MFS transporter	I89V	0.142857	7	SAUSA300_0180	integral membrane protein LmrP	SAUSA300_0180
NZ_LR130515_630341_G_A	0.0207	0.0928	0.528	0.0856		NZ_LR130515	630341	G	A	snp	missense_variant	EW033_RS00100				0.5	2
NZ_LR130515_1127040_CT_C	0.0207	0.0928	0.528	0.0856	SAUSA300_0956	NZ_LR130515	1127040	CT	C	del	missense_variant	EW033_RS05880		GNAT family N-acetyltransferase	K139fs	0.5	2	SAUSA300_0956	hypothetical protein	SAUSA300_0956
NZ_LR130515_133464_A_T	0.196	0.0929	-0.513	0.0855	lctP1	NZ_LR130515	133464	A	T	snp	missense_variant	EW033_RS00685		L-lactate permease	I330L	0.166667	6	SAUSA300_0112	L-lactate permease	lctP
NZ_LR130515_133470_T_A	0.196	0.0929	-0.513	0.0855	lctP1	NZ_LR130515	133470	T	A	snp	missense_variant	EW033_RS00685		L-lactate permease	L332M	0.166667	6	SAUSA300_0112	L-lactate permease	lctP
NZ_LR130515_2984883_ATGAGCG_TTGAAAT	0.101	0.093	-0.665	0.0855	sasA	NZ_LR130515	2984883	ATGAGCG	TTGAAAT	complex	missense_variant	EW033_RS15780	sasA	serine-rich repeat glycoprotein adhesin SasA	RSS1681IST	0.2	5	SAUSA300_2589	cell wall anchor domain-containing protein	SAUSA300_2589
NZ_LR130515_3019807_CTCAT_TACAC	0.455	0.093	-0.477	0.0855		NZ_LR130515	3019807	CTCAT	TACAC	complex	missense_variant	EW033_RS15950-EW033_RS15955				0.142857	7
NZ_LR130515_1561954_T_A	0.382	0.0933	0.535	0.0854	ebh	NZ_LR130515	1561954	T	A	snp	missense_variant	EW033_RS07955	ebh	hyperosmolarity resistance protein Ebh	T1174S	0.333333	3	SAUSA300_1327	cell surface protein	SAUSA300_1327
NZ_LR130515_2848346_G_T	0.39	0.0933	0.616	0.0854		NZ_LR130515	2848346	G	T	snp	missense_variant	EW033_RS15120-EW033_RS15125				0.333333	3
NZ_LR130515_2940561_CTTA_TCTT	0.424	0.0933	0.506	0.0854	SAUSA300_2556	NZ_LR130515	2940561	CTTA	TCTT	complex	missense_variant	EW033_RS15610		ABC transporter permease	K399R	0.142857	7	SAUSA300_2556	ABC transporter protein	SAUSA300_2556	SAUSA300_2556-SAUSA300_2557-nsaS-nsaR-SAUSA300_2560
NZ_LR130515_2940575_A_C	0.424	0.0933	0.506	0.0854	SAUSA300_2556	NZ_LR130515	2940575	A	C	snp	missense_variant	EW033_RS15610		ABC transporter permease	S395A	0.142857	7	SAUSA300_2556	ABC transporter protein	SAUSA300_2556	SAUSA300_2556-SAUSA300_2557-nsaS-nsaR-SAUSA300_2560
NZ_LR130515_2912166_C_T	0.395	0.0934	0.373	0.0854		NZ_LR130515	2912166	C	T	snp	missense_variant	EW033_RS15460-EW033_RS15465				0.0714286	14
NZ_LR130515_1340780_G_GTCAAC	0.0749	0.0935	0.451	0.0854	EW033_RS06975	NZ_LR130515	1340780	G	GTCAAC	ins	missense_variant	EW033_RS06975		hypothetical protein	E6fs	0.0833333	12
NZ_LR130515_740155_G_T	0.191	0.0936	0.508	0.0854	SAUSA300_0592	NZ_LR130515	740155	G	T	snp	missense_variant	EW033_RS03840		HD domain-containing protein	A144S	0.142857	7	SAUSA300_0592	hypothetical protein	SAUSA300_0592	SAUSA300_0591-SAUSA300_0592-SAUSA300_0593
NZ_LR130515_1180502_G_A	0.765	0.0936	0.274	0.0854		NZ_LR130515	1180502	G	A	snp	missense_variant	EW033_RS00100				0.25	4
NZ_LR130515_29131_GTTTT_AGGCGACATTTC	0.062	0.0937	-0.591	0.0853		NZ_LR130515	29131	GTTTT	AGGCGACATTTC	complex	missense_variant	EW033_RS00100				0.125	8
NZ_LR130515_2794645_AC_TA	0.214	0.0937	-0.497	0.0853		NZ_LR130515	2794645	AC	TA	mnp	missense_variant	EW033_RS14835-EW033_RS14840				0.142857	7
NZ_LR130515_133581_T_A	0.0439	0.0942	-0.764	0.0852	lctP1	NZ_LR130515	133581	T	A	snp	missense_variant	EW033_RS00685		L-lactate permease	L369I	0.5	2	SAUSA300_0112	L-lactate permease	lctP
NZ_LR130515_815235_T_A	0.0439	0.0942	-0.764	0.0852	SAUSA300_0668	NZ_LR130515	815235	T	A	snp	missense_variant	EW033_RS04245		hypothetical protein	K221N	0.5	2	SAUSA300_0668	hypothetical protein	SAUSA300_0668	SAUSA300_0666-SAUSA300_0667-SAUSA300_0668
NZ_LR130515_815393_G_A	0.0439	0.0942	-0.764	0.0852	SAUSA300_0668	NZ_LR130515	815393	G	A	snp	missense_variant	EW033_RS04245		hypothetical protein	R169C	0.5	2	SAUSA300_0668	hypothetical protein	SAUSA300_0668	SAUSA300_0666-SAUSA300_0667-SAUSA300_0668
NZ_LR130515_1187232_GCA_TCG	0.0439	0.0942	-0.764	0.0852		NZ_LR130515	1187232	GCA	TCG	complex	missense_variant	EW033_RS00100				0.5	2
NZ_LR130515_1187273_T_C	0.0439	0.0942	-0.764	0.0852		NZ_LR130515	1187273	T	C	snp	missense_variant	EW033_RS00100				0.5	2
NZ_LR130515_1195808_C_T	0.0439	0.0942	-0.764	0.0852	SAUSA300_1019	NZ_LR130515	1195808	C	T	snp	missense_variant	EW033_RS06230		YlbF family regulator	H117Y	0.5	2	SAUSA300_1019	hypothetical protein	SAUSA300_1019	SAUSA300_1018-SAUSA300_1019
NZ_LR130515_1196789_G_T	0.0439	0.0942	-0.764	0.0852	SAUSA300_1020	NZ_LR130515	1196789	G	T	snp	missense_variant	EW033_RS06235		glycerophosphodiester phosphodiesterase	T32N	0.5	2	SAUSA300_1020	glycerophosphoryl diester phosphodiesterase family protein	SAUSA300_1020
NZ_LR130515_1199573_C_T	0.0439	0.0942	-0.764	0.0852	SAUSA300_1025	NZ_LR130515	1199573	C	T	snp	missense_variant	EW033_RS06260		nucleotidyltransferase	A165T	0.5	2	SAUSA300_1025	hypothetical protein	SAUSA300_1025
NZ_LR130515_1610485_C_T	0.0439	0.0942	-0.764	0.0852	rpsA	NZ_LR130515	1610485	C	T	snp	missense_variant	EW033_RS08170	rpsA	30S ribosomal protein S1	V19I	0.5	2	SAUSA300_1365	30S ribosomal protein S1	rpsA
NZ_LR130515_1906359_G_A	0.0439	0.0942	-0.764	0.0852	SAUSA300_1701	NZ_LR130515	1906359	G	A	snp	missense_variant	EW033_RS09705		NAD(P)/FAD-dependent oxidoreductase	V344I	0.5	2	SAUSA300_1701	hypothetical protein	SAUSA300_1701
NZ_LR130515_1923590_A_T	0.0439	0.0942	-0.764	0.0852	putA	NZ_LR130515	1923590	A	T	snp	missense_variant	EW033_RS09765		proline dehydrogenase	K329N	0.5	2	SAUSA300_1711	proline dehydrogenase	putA
NZ_LR130515_3022962_A_T	0.0336	0.0943	0.758	0.0852		NZ_LR130515	3022962	A	T	snp	missense_variant	EW033_RS15965-EW033_RS15970				0.333333	3
NZ_LR130515_200010_TGT_GTC	0.463	0.0945	-0.416	0.0851		NZ_LR130515	200010	TGT	GTC	complex	missense_variant	EW033_RS00100				0.0909091	11
NZ_LR130515_586336_T_C	0.129	0.0945	-0.717	0.0851	EW033_RS03025	NZ_LR130515	586336	T	C	snp	missense_variant	EW033_RS03025		hypothetical protein	W10R	0.333333	3
NZ_LR130515_818162_G_A	0.129	0.0945	0.561	0.0851	SAUSA300_0670	NZ_LR130515	818162	G	A	snp	missense_variant	EW033_RS04255		ABC transporter ATP-binding protein/permease	D334N	0.333333	3	SAUSA300_0670	ABC transporter ATP-binding protein	SAUSA300_0670	SAUSA300_0670-SAUSA300_0671
NZ_LR130515_1910441_AACA_CACT	0.129	0.0945	0.561	0.0851	sasC	NZ_LR130515	1910441	AACA	CACT	complex	missense_variant	EW033_RS09710	sasC	LPXTG-anchored repetitive surface protein SasC	D944E	0.333333	3	SAUSA300_1702	cell wall surface anchor family protein	SAUSA300_1702
NZ_LR130515_336489_G_T	0.0491	0.0946	-0.519	0.0851		NZ_LR130515	336489	G	T	snp	missense_variant	EW033_RS00100				0.25	4
NZ_LR130515_155477_C_T	0.328	0.0947	0.509	0.0851		NZ_LR130515	155477	C	T	snp	missense_variant	EW033_RS00100				0.2	5
NZ_LR130515_933568_G_A	0.248	0.0947	0.63	0.0851	clfA	NZ_LR130515	933568	G	A	snp	missense_variant	EW033_RS04835	clfA	MSCRAMM family adhesin clumping factor ClfA	D70N	0.333333	3	SAUSA300_0772	clumping factor A	clfA
NZ_LR130515_1035081_A_C	0.101	0.0947	0.432	0.0851		NZ_LR130515	1035081	A	C	snp	missense_variant	EW033_RS00100				0.1	10
NZ_LR130515_1573098_AT_GA	0.3	0.0947	0.544	0.0851	dynA	NZ_LR130515	1573098	AT	GA	mnp	missense_variant	EW033_RS07985		hypothetical protein	D912V	0.166667	6	SAUSA300_1333	hypothetical protein	SAUSA300_1333	SAUSA300_1332-dynA
NZ_LR130515_1712139_T_C	0.24	0.0948	-0.54	0.085		NZ_LR130515	1712139	T	C	snp	missense_variant	EW033_RS00100				0.142857	7
NZ_LR130515_2497685_T_A	0.233	0.0948	0.549	0.085	hysA	NZ_LR130515	2497685	T	A	snp	missense_variant	EW033_RS13190	hysA	hyaluronate lyase HysA	V697D	0.25	4	SAUSA300_2161	hyaluronate lyase	hysA
NZ_LR130515_1954662_A_T	0.305	0.0949	-0.37	0.085		NZ_LR130515	1954662	A	T	snp	missense_variant	EW033_RS00100				0.1	10
NZ_LR130515_2847435_C_A	0.362	0.095	0.625	0.085		NZ_LR130515	2847435	C	A	snp	missense_variant	EW033_RS15110-EW033_RS15115				0.333333	3
NZ_LR130515_2871694_C_T	0.362	0.095	0.625	0.085	SAUSA300_2513	NZ_LR130515	2871694	C	T	snp	missense_variant	EW033_RS15230		NmrA/HSCARG family protein	D270N	0.5	2	SAUSA300_2513	hypothetical protein	SAUSA300_2513	SAUSA300_2512-SAUSA300_2513-SAUSA300_2514
NZ_LR130515_797029_AGATAAT_GGATGAC	0.233	0.0951	-0.465	0.085	vraG	NZ_LR130515	797029	AGATAAT	GGATGAC	complex	missense_variant	EW033_RS04140		FtsX-like permease family protein	N362D	0.0833333	12	SAUSA300_0648	ABC transporter permease	SAUSA300_0648	vraF-vraG
NZ_LR130515_2342293_CTAT_TTAA	0.171	0.0952	0.508	0.0849		NZ_LR130515	2342293	CTAT	TTAA	complex	missense_variant	EW033_RS00100				0.1	10
NZ_LR130515_2684310_AG_CA	0.243	0.0952	0.374	0.0849	SAUSA300_2349	NZ_LR130515	2684310	AG	CA	mnp	missense_variant	EW033_RS14255		formate/nitrite transporter family protein	T118M	0.0625	16	SAUSA300_2349	formate/nitrite transporter family protein	SAUSA300_2349
NZ_LR130515_2872751_GGTAGATT_AGTTGATG	0.227	0.0952	-0.552	0.0849	SAUSA300_2514	NZ_LR130515	2872751	GGTAGATT	AGTTGATG	complex	missense_variant	EW033_RS15235		DUF2316 family protein	E21A	0.2	5	SAUSA300_2514	hypothetical protein	SAUSA300_2514	SAUSA300_2512-SAUSA300_2513-SAUSA300_2514
NZ_LR130515_1954483_AGAC_TGAT	0.295	0.0953	-0.465	0.0849	SAUSA300_1743	NZ_LR130515	1954483	AGAC	TGAT	complex	missense_variant	EW033_RS09935		DUF3969 family protein	E78D	0.333333	3	SAUSA300_1743	hypothetical protein	SAUSA300_1743	SAUSA300_1741-SAUSA300_1742-SAUSA300_1743
NZ_LR130515_1569565_TT_AG	0.134	0.0954	0.433	0.0849	ilvA1	NZ_LR130515	1569565	TT	AG	complex	missense_variant	EW033_RS07970	tdcB	bifunctional threonine ammonia-lyase/L-serine ammonia-lyase TdcB	E81A	0.0909091	11	SAUSA300_1330	threonine dehydratase	ilvA	SAUSA300_1329-ilvA1-ald1
NZ_LR130515_2546368_A_AT	0.0207	0.0954	0.99	0.0849		NZ_LR130515	2546368	A	AT	ins	missense_variant	EW033_RS13520-EW033_RS13540				0.333333	3
NZ_LR130515_2935483_ATTGCGCT_GTTGAGCA	0.566	0.0954	0.643	0.0849		NZ_LR130515	2935483	ATTGCGCT	GTTGAGCA	complex	missense_variant	EW033_RS15575-EW033_RS15580				0.333333	3
NZ_LR130515_2884757_C_T	0.439	0.0955	0.233	0.0849	EW033_RS15300	NZ_LR130515	2884757	C	T	snp	missense_variant	EW033_RS15300	blaR1	beta-lactam sensor/signal transducer BlaR1	E408K	0.0333333	30
NZ_LR130515_2947847_C_CA	0.0233	0.0955	-0.656	0.0849		NZ_LR130515	2947847	C	CA	ins	missense_variant	EW033_RS15650-EW033_RS15655				0.333333	3
NZ_LR130515_3049497_G_A	0.525	0.0956	0.534	0.0848		NZ_LR130515	3049497	G	A	snp	missense_variant	EW033_RS16095-CHR_END				0.333333	3
NZ_LR130515_3028251_C_T	0.408	0.0957	-0.351	0.0848		NZ_LR130515	3028251	C	T	snp	missense_variant	EW033_RS15980-EW033_RS15985				0.0625	16
NZ_LR130515_2543903_T_C	0.111	0.0958	0.74	0.0848		NZ_LR130515	2543903	T	C	snp	missense_variant	EW033_RS13500-EW033_RS13505				0.25	4
NZ_LR130515_1626246_T_C	0.0465	0.096	-0.552	0.0847		NZ_LR130515	1626246	T	C	snp	missense_variant	EW033_RS00100				0.333333	3
NZ_LR130515_1954173_TGGGGC_CCGTGA	0.103	0.0961	-0.483	0.0847	SAUSA300_1742	NZ_LR130515	1954173	TGGGGC	CCGTGA	complex	missense_variant	EW033_RS09930		hypothetical protein	GA198RE	0.25	4	SAUSA300_1742	hypothetical protein	SAUSA300_1742	SAUSA300_1741-SAUSA300_1742-SAUSA300_1743
NZ_LR130515_2447529_G_A	0.0801	0.0961	0.639	0.0847	rocF	NZ_LR130515	2447529	G	A	snp	missense_variant	EW033_RS12925	rocF	arginase	A56V	0.333333	3	SAUSA300_2114	arginase	rocF
NZ_LR130515_2858604_AT_GC	0.297	0.0961	0.483	0.0847	crtN	NZ_LR130515	2858604	AT	GC	mnp	missense_variant	EW033_RS15160	crtI	phytoene desaturase	M68A	0.142857	7	SAUSA300_2498	squalene synthase	crtN	crtN-crtM-crtQ-crtP-crtO
NZ_LR130515_2528862_T_C	0.0465	0.0962	-0.75	0.0847		NZ_LR130515	2528862	T	C	snp	missense_variant	EW033_RS13430-EW033_RS13435				0.5	2
NZ_LR130515_2626921_TTTTC_CTTTA	0.416	0.0963	0.471	0.0847	SAUSA300_2297	NZ_LR130515	2626921	TTTTC	CTTTA	complex	missense_variant	EW033_RS13975		hypothetical protein	VF164AL	0.125	8	SAUSA300_2297	hypothetical protein	SAUSA300_2297
NZ_LR130515_1264091_T_C	0.276	0.0966	0.501	0.0846		NZ_LR130515	1264091	T	C	snp	missense_variant	EW033_RS00100				0.142857	7
NZ_LR130515_1833361_GT_G	0.0672	0.0966	-0.518	0.0846		NZ_LR130515	1833361	GT	G	del	missense_variant	EW033_RS00100				0.25	4
NZ_LR130515_2848205_T_C	0.093	0.0966	0.552	0.0846	EW033_RS15120	NZ_LR130515	2848205	T	C	snp	missense_variant	EW033_RS15120		hypothetical protein	Y43C	0.333333	3
NZ_LR130515_2863846_G_A	0.558	0.0967	0.475	0.0846		NZ_LR130515	2863846	G	A	snp	missense_variant	EW033_RS15185-EW033_RS15190				0.142857	7
NZ_LR130515_1495_GC_AT	0.0879	0.097	-1.31	0.0845		NZ_LR130515	1495	GC	AT	complex	missense_variant	EW033_RS00005-EW033_RS00010				0.25	4
NZ_LR130515_21747_GCTGTCAAAGA_ACTGGCAACGC	0.0879	0.097	-1.31	0.0845		NZ_LR130515	21747	GCTGTCAAAGA	ACTGGCAACGC	complex	missense_variant	EW033_RS00085-EW033_RS00095				0.333333	3
NZ_LR130515_21804_A_G	0.0879	0.097	-1.31	0.0845		NZ_LR130515	21804	A	G	snp	missense_variant	EW033_RS00085-EW033_RS00095				0.5	2
NZ_LR130515_33015_TT_CC	0.0879	0.097	-1.31	0.0845		NZ_LR130515	33015	TT	CC	mnp	missense_variant	EW033_RS00100				0.25	4
NZ_LR130515_33049_CAAAGAATA_TAAAAAAAC	0.0879	0.097	-1.31	0.0845		NZ_LR130515	33049	CAAAGAATA	TAAAAAAAC	complex	missense_variant	EW033_RS00100				0.333333	3
NZ_LR130515_123491_A_C	0.0879	0.097	-1.31	0.0845	SAUSA300_0104	NZ_LR130515	123491	A	C	snp	missense_variant	EW033_RS00655		helix-turn-helix domain-containing protein	N422T	0.142857	7	SAUSA300_0104	AraC family transcriptional regulator	SAUSA300_0104
NZ_LR130515_124350_TACG_GACA	0.0879	0.097	-1.31	0.0845	SAUSA300_0104	NZ_LR130515	124350	TACG	GACA	complex	missense_variant	EW033_RS00655		helix-turn-helix domain-containing protein	D708E	0.333333	3	SAUSA300_0104	AraC family transcriptional regulator	SAUSA300_0104
NZ_LR130515_145578_TGAG_AGAT	0.0879	0.097	-1.31	0.0845	sbnE	NZ_LR130515	145578	TGAG	AGAT	complex	missense_variant	EW033_RS00740	sbnE	L-2,3-diaminopropanoate--citrate ligase SbnE	E44D	0.333333	3	SAUSA300_0122	IucA/IucC family siderophore biosynthesis protein	SAUSA300_0122	sbnA-sbnB-sbnC-sbnD-sbnE-sbnF-sbnG-sbnH-sbnI
NZ_LR130515_146074_GAC_AAT	0.0879	0.097	-1.31	0.0845	sbnE	NZ_LR130515	146074	GAC	AAT	complex	missense_variant	EW033_RS00740	sbnE	L-2,3-diaminopropanoate--citrate ligase SbnE	D209N	0.25	4	SAUSA300_0122	IucA/IucC family siderophore biosynthesis protein	SAUSA300_0122	sbnA-sbnB-sbnC-sbnD-sbnE-sbnF-sbnG-sbnH-sbnI
NZ_LR130515_148915_TAC_AAA	0.0879	0.097	-1.31	0.0845	sbnF	NZ_LR130515	148915	TAC	AAA	complex	missense_variant	EW033_RS00745	sbnF	3-(L-alanin-3-ylcarbamoyl)-2-[(2- aminoethylcarbamoyl)methyl]-2-hydroxypropanoate synthase SbnF	T608N	0.25	4	SAUSA300_0123	IucC family siderophore biosynthesis protein	SAUSA300_0123	sbnA-sbnB-sbnC-sbnD-sbnE-sbnF-sbnG-sbnH-sbnI
NZ_LR130515_150755_ATAC_GTAA	0.0879	0.097	-1.31	0.0845	sbnH	NZ_LR130515	150755	ATAC	GTAA	complex	missense_variant	EW033_RS00755	sbnH	staphyloferrin B biosynthesis decarboxylase SbnH	IQ354VK	0.5	2	SAUSA300_0125	pyridoxal-dependent decarboxylase	SAUSA300_0125	sbnA-sbnB-sbnC-sbnD-sbnE-sbnF-sbnG-sbnH-sbnI
NZ_LR130515_153946_G_A	0.0879	0.097	-1.31	0.0845	galE	NZ_LR130515	153946	G	A	snp	missense_variant	EW033_RS00785		NAD-dependent epimerase/dehydratase family protein	S46N	0.5	2	SAUSA300_0130	NAD-dependent epimerase/dehydratase family protein	SAUSA300_0130	galE-SAUSA300_0131
NZ_LR130515_154163_ATTCA_TTTTG	0.0879	0.097	-1.31	0.0845	galE	NZ_LR130515	154163	ATTCA	TTTTG	complex	missense_variant	EW033_RS00785		NAD-dependent epimerase/dehydratase family protein	I120V	0.5	2	SAUSA300_0130	NAD-dependent epimerase/dehydratase family protein	SAUSA300_0130	galE-SAUSA300_0131
NZ_LR130515_154787_GTGAAATTGG_AAAAAAATAA	0.0879	0.097	-1.31	0.0845	galE	NZ_LR130515	154787	GTGAAATTGG	AAAAAAATAA	complex	missense_variant	EW033_RS00785		NAD-dependent epimerase/dehydratase family protein	Ter327Kext*?	0.25	4	SAUSA300_0130	NAD-dependent epimerase/dehydratase family protein	SAUSA300_0130	galE-SAUSA300_0131
NZ_LR130515_154860_AAAAAAGGGC_GAGAAAAAGA	0.0879	0.097	-1.31	0.0845	SAUSA300_0131	NZ_LR130515	154860	AAAAAAGGGC	GAGAAAAAGA	complex	missense_variant	EW033_RS00790		sugar transferase	KKG37RKR	0.2	5	SAUSA300_0131	putative sugar transferase	SAUSA300_0131	galE-SAUSA300_0131
NZ_LR130515_158302_T_A	0.0879	0.097	-1.31	0.0845	SAUSA300_0134	NZ_LR130515	158302	T	A	snp	missense_variant	EW033_RS00805		lipopolysaccharide biosynthesis protein	F92L	0.5	2	SAUSA300_0134	polysaccharide extrusion protein	SAUSA300_0134	SAUSA300_0132-SAUSA300_0133-SAUSA300_0134
NZ_LR130515_158844_GTATCCAG_CTTTACAT	0.0879	0.097	-1.31	0.0845	SAUSA300_0134	NZ_LR130515	158844	GTATCCAG	CTTTACAT	complex	missense_variant	EW033_RS00805		lipopolysaccharide biosynthesis protein	CIQ273SLH	0.5	2	SAUSA300_0134	polysaccharide extrusion protein	SAUSA300_0134	SAUSA300_0132-SAUSA300_0133-SAUSA300_0134
NZ_LR130515_170444_CTT_TGC	0.0879	0.097	-1.31	0.0845	SAUSA300_0146	NZ_LR130515	170444	CTT	TGC	complex	missense_variant	EW033_RS00870		hypothetical protein	A21V	0.333333	3	SAUSA300_0146	hypothetical protein	SAUSA300_0146	SAUSA300_0146-SAUSA300_0147
NZ_LR130515_171348_AGC_GGT	0.0879	0.097	-1.31	0.0845	SAUSA300_0146	NZ_LR130515	171348	AGC	GGT	complex	missense_variant	EW033_RS00870		hypothetical protein	A323V	0.5	2	SAUSA300_0146	hypothetical protein	SAUSA300_0146	SAUSA300_0146-SAUSA300_0147
NZ_LR130515_182731_AAGACCTGGT_TAGATCCGGC	0.0879	0.097	-1.31	0.0845	EW033_RS00910	NZ_LR130515	182731	AAGACCTGGT	TAGATCCGGC	complex	missense_variant	EW033_RS00910		polysaccharide biosynthesis protein	P541S	0.5	2
NZ_LR130515_200196_G_T	0.0879	0.097	-1.31	0.0845		NZ_LR130515	200196	G	T	snp	missense_variant	EW033_RS00100				0.2	5
NZ_LR130515_220348_TGA_CGC	0.0879	0.097	-1.31	0.0845	argJ	NZ_LR130515	220348	TGA	CGC	complex	missense_variant	EW033_RS01070	argJ	bifunctional glutamate N-acetyltransferase/amino-acid acetyltransferase ArgJ	S210A	0.5	2	SAUSA300_0185	bifunctional ornithine acetyltransferase/N-acetylglutamate synthase protein	argJ	argB-argJ-argC-argD
NZ_LR130515_220524_CAAAA_TGTAC	0.0879	0.097	-1.31	0.0845	argJ	NZ_LR130515	220524	CAAAA	TGTAC	complex	missense_variant	EW033_RS01070	argJ	bifunctional glutamate N-acetyltransferase/amino-acid acetyltransferase ArgJ	NFA150KYT	0.333333	3	SAUSA300_0185	bifunctional ornithine acetyltransferase/N-acetylglutamate synthase protein	argJ	argB-argJ-argC-argD
NZ_LR130515_239231_ATAG_TTAA	0.0879	0.097	-1.31	0.0845		NZ_LR130515	239231	ATAG	TTAA	complex	missense_variant	EW033_RS00100				0.2	5
NZ_LR130515_240062_CGGTGATG_TGGTAACT	0.0879	0.097	-1.31	0.0845	SAUSA300_0200	NZ_LR130515	240062	CGGTGATG	TGGTAACT	complex	missense_variant	EW033_RS01145		ABC transporter ATP-binding protein	TS287KL	0.166667	6	SAUSA300_0200	peptide ABC transporter ATP-binding protein	SAUSA300_0200
NZ_LR130515_262589_TC_GG	0.0879	0.097	-1.31	0.0845	hptS	NZ_LR130515	262589	TC	GG	complex	missense_variant	EW033_RS01230		sensor histidine kinase	I27L	0.5	2	SAUSA300_0218	sensor histidine kinase family protein	SAUSA300_0218	hptR-hptS-hptA
NZ_LR130515_267324_TGATTATTAA_AGAGTAATAG	0.0879	0.097	-1.31	0.0845		NZ_LR130515	267324	TGATTATTAA	AGAGTAATAG	complex	missense_variant	EW033_RS00100				0.125	8
NZ_LR130515_272039_TAGAC_AAGAT	0.0879	0.097	-1.31	0.0845		NZ_LR130515	272039	TAGAC	AAGAT	complex	missense_variant	EW033_RS00100				0.25	4
NZ_LR130515_285062_CCACGAT_TCAAGAC	0.0879	0.097	-1.31	0.0845		NZ_LR130515	285062	CCACGAT	TCAAGAC	complex	missense_variant	EW033_RS00100				0.1	10
NZ_LR130515_288979_CTT_TTG	0.0879	0.097	-1.31	0.0845	glcC	NZ_LR130515	288979	CTT	TTG	complex	missense_variant	EW033_RS01345		PTS transporter subunit EIIC	K445Q	0.5	2	SAUSA300_0236	PTS system, IIBC components	SAUSA300_0236
NZ_LR130515_291273_TGAACA_CGATCT	0.0879	0.097	-1.31	0.0845	SAUSA300_0237	NZ_LR130515	291273	TGAACA	CGATCT	complex	missense_variant	EW033_RS01350		nucleoside hydrolase	EH200DL	0.5	2	SAUSA300_0237	inosine-uridine preferring nucleoside hydrolase	SAUSA300_0237
NZ_LR130515_291748_CACAAAAT_AC	0.0879	0.097	-1.31	0.0845	EW033_RS01355	NZ_LR130515	291748	CACAAAAT	AC	complex	missense_variant	EW033_RS01355		hypothetical protein	N9_Y12delinsKH	0.0769231	13
NZ_LR130515_291812_A_G	0.0879	0.097	-1.31	0.0845	EW033_RS01355	NZ_LR130515	291812	A	G	snp	missense_variant	EW033_RS01355		hypothetical protein	K31E	0.5	2
NZ_LR130515_299009_A_T	0.0879	0.097	-1.31	0.0845		NZ_LR130515	299009	A	T	snp	missense_variant	EW033_RS00100				0.5	2
NZ_LR130515_304652_CAC_AAG	0.0879	0.097	-1.31	0.0845	tarF	NZ_LR130515	304652	CAC	AAG	complex	missense_variant	EW033_RS01415		CDP-glycerol glycerophosphotransferase family protein	H378K	0.5	2	SAUSA300_0248	putative teichoic acid biosynthesis protein F	SAUSA300_0248
NZ_LR130515_310427_TC_GT	0.0879	0.097	-1.31	0.0845	scdA	NZ_LR130515	310427	TC	GT	mnp	missense_variant	EW033_RS01440	scdA	iron-sulfur cluster repair di-iron protein ScdA	S41V	0.5	2	SAUSA300_0253	cell wall biosynthesis protein ScdA	scdA
NZ_LR130515_317954_ACCTGC_GCCCTT	0.0879	0.097	-1.31	0.0845	bglR	NZ_LR130515	317954	ACCTGC	GCCCTT	complex	missense_variant	EW033_RS01470		GntR family transcriptional regulator	A195K	0.5	2	SAUSA300_0258	GntR family transcriptional regulator	SAUSA300_0258
NZ_LR130515_319208_AA_GT	0.0879	0.097	-1.31	0.0845	EW033_RS01480	NZ_LR130515	319208	AA	GT	mnp	missense_variant	EW033_RS01480		hypothetical protein	Q174R	0.5	2
NZ_LR130515_330666_C_T	0.0879	0.097	-1.31	0.0845	lytM	NZ_LR130515	330666	C	T	snp	missense_variant	EW033_RS01540	lytM	glycine-glycine endopeptidase LytM	T310M	0.5	2	SAUSA300_0270	peptidoglycan hydrolase	lytM
NZ_LR130515_339573_AG_GA	0.0879	0.097	-1.31	0.0845	esaA	NZ_LR130515	339573	AG	GA	complex	missense_variant	EW033_RS01575	esaA	type VII secretion protein EsaA	V881I	0.5	2	SAUSA300_0279	hypothetical protein	SAUSA300_0279	esaA-essA-esaB-essB-essC-esxC-esxB-esaE-esxD-esaD-esaG
NZ_LR130515_358141_A_G	0.0879	0.097	-1.31	0.0845		NZ_LR130515	358141	A	G	snp	missense_variant	EW033_RS00100				0.2	5
NZ_LR130515_372124_T_A	0.0879	0.097	-1.31	0.0845		NZ_LR130515	372124	T	A	snp	missense_variant	EW033_RS00100				0.25	4
NZ_LR130515_377325_AA_CC	0.0879	0.097	-1.31	0.0845	gehB	NZ_LR130515	377325	AA	CC	complex	missense_variant	EW033_RS01790	lip2	YSIRK domain-containing triacylglycerol lipase Lip2/Geh	N180H	0.5	2	SAUSA300_0320	triacylglycerol lipase	SAUSA300_0320
NZ_LR130515_438729_T_TG	0.0879	0.097	-1.31	0.0845		NZ_LR130515	438729	T	TG	ins	missense_variant	EW033_RS00100				0.2	5
NZ_LR130515_440966_ACTT_CCTC	0.0879	0.097	-1.31	0.0845	SAUSA300_0340	NZ_LR130515	440966	ACTT	CCTC	complex	missense_variant	EW033_RS02220		NAD(P)H-dependent oxidoreductase	E42D	0.333333	3	SAUSA300_0340	NADH-dependent FMN reductase	SAUSA300_0340	SAUSA300_0338-SAUSA300_0339-SAUSA300_0340
NZ_LR130515_443107_C_T	0.0879	0.097	-1.31	0.0845	SAUSA300_0343	NZ_LR130515	443107	C	T	snp	missense_variant	EW033_RS02235		GNAT family N-acetyltransferase	T76M	0.5	2	SAUSA300_0343	acetyltransferase	SAUSA300_0343
NZ_LR130515_444864_TGATA_AGATG	0.0879	0.097	-1.31	0.0845	fepB	NZ_LR130515	444864	TGATA	AGATG	complex	missense_variant	EW033_RS02245	efeB	deferrochelatase/peroxidase EfeB	T109A	0.333333	3	SAUSA300_0345	Tat-translocated protein	SAUSA300_0345	fepA-fepB-fepC
NZ_LR130515_445842_A_C	0.0879	0.097	-1.31	0.0845	fepC	NZ_LR130515	445842	A	C	snp	missense_variant	EW033_RS02250		iron permease FTR1 family protein	E20A	0.5	2	SAUSA300_0346	hypothetical protein	SAUSA300_0346	fepA-fepB-fepC
NZ_LR130515_447801_TG_AC	0.0879	0.097	-1.31	0.0845	tatC	NZ_LR130515	447801	TG	AC	mnp	missense_variant	EW033_RS02255	tatC	twin-arginine translocase subunit TatC	T153S	0.125	8	SAUSA300_0347	Sec-independent protein translocase TatC	tatC	tatC-tatA
NZ_LR130515_448813_TAC_GAT	0.0879	0.097	-1.31	0.0845	SAUSA300_0349	NZ_LR130515	448813	TAC	GAT	complex	missense_variant	EW033_RS02265		DUF1398 family protein	V59I	0.25	4	SAUSA300_0349	hypothetical protein	SAUSA300_0349
NZ_LR130515_449647_AA_GG	0.0879	0.097	-1.31	0.0845	SAUSA300_0351	NZ_LR130515	449647	AA	GG	mnp	missense_variant	EW033_RS02275		DUF3169 family protein	Q73R	0.166667	6	SAUSA300_0351	hypothetical protein	SAUSA300_0351	SAUSA300_0350-SAUSA300_0351-SAUSA300_0352-SAUSA300_0353
NZ_LR130515_452703_CT_GC	0.0879	0.097	-1.31	0.0845	SAUSA300_0354	NZ_LR130515	452703	CT	GC	complex	missense_variant	EW033_RS02290		hypothetical protein	S146A	0.5	2	SAUSA300_0354	hypothetical protein	ltrA
NZ_LR130515_453238_AGGT_GGGC	0.0879	0.097	-1.31	0.0845		NZ_LR130515	453238	AGGT	GGGC	complex	missense_variant	EW033_RS00100				0.25	4
NZ_LR130515_453310_TA_GG	0.0879	0.097	-1.31	0.0845		NZ_LR130515	453310	TA	GG	complex	missense_variant	EW033_RS00100				0.2	5
NZ_LR130515_460279_G_C	0.0879	0.097	-1.31	0.0845	metC	NZ_LR130515	460279	G	C	snp	missense_variant	EW033_RS02315		PLP-dependent transferase	D218E	0.142857	7	SAUSA300_0359	trans-sulfuration enzyme family protein	SAUSA300_0359	mdh-metE-metF-metC-metI
NZ_LR130515_461574_TGG_CGT	0.0879	0.097	-1.31	0.0845	metI	NZ_LR130515	461574	TGG	CGT	complex	missense_variant	EW033_RS02320		aminotransferase class I/II-fold pyridoxal phosphate-dependent enzyme	P153T	0.25	4	SAUSA300_0360	Cys/Met metabolism PLP-dependent enzyme	SAUSA300_0360	mdh-metE-metF-metC-metI
NZ_LR130515_469259_C_G	0.0879	0.097	-1.31	0.0845	EW033_RS02385	NZ_LR130515	469259	C	G	snp	missense_variant	EW033_RS02385		integrase	E30Q	0.5	2
NZ_LR130515_469273_ACTCTC_TCTTTA	0.0879	0.097	-1.31	0.0845	EW033_RS02385	NZ_LR130515	469273	ACTCTC	TCTTTA	complex	missense_variant	EW033_RS02385		integrase	KRV23NKE	0.2	5
NZ_LR130515_469289_GTAGC_ATAGT	0.0879	0.097	-1.31	0.0845	EW033_RS02385	NZ_LR130515	469289	GTAGC	ATAGT	complex	missense_variant	EW033_RS02385		integrase	L20F	0.5	2
NZ_LR130515_469329_TACC_AACT	0.0879	0.097	-1.31	0.0845	EW033_RS02385	NZ_LR130515	469329	TACC	AACT	complex	missense_variant	EW033_RS02385		integrase	M5I	0.25	4
NZ_LR130515_470279_AAA_GAT	0.0879	0.097	-1.31	0.0845	selX	NZ_LR130515	470279	AAA	GAT	complex	missense_variant	EW033_RS02390		toxin	K192D	0.25	4	SAUSA300_0370	putative enterotoxin	SAUSA300_0370
NZ_LR130515_471858_AT_TTA	0.0879	0.097	-1.31	0.0845		NZ_LR130515	471858	AT	TTA	complex	missense_variant	EW033_RS00100				0.142857	7
NZ_LR130515_472748_A_G	0.0879	0.097	-1.31	0.0845	SAUSA300_0374	NZ_LR130515	472748	A	G	snp	missense_variant	EW033_RS02410		GlsB/YeaQ/YmgE family stress response membrane protein	M81V	0.25	4	SAUSA300_0374	hypothetical protein	SAUSA300_0374
NZ_LR130515_472773_TTGGAAATT_CTTAGGTTGAATG	0.0879	0.097	-1.31	0.0845		NZ_LR130515	472773	TTGGAAATT	CTTAGGTTGAATG	complex	missense_variant	EW033_RS00100				0.333333	3
NZ_LR130515_473836_G_A	0.0879	0.097	-1.31	0.0845	SAUSA300_0376	NZ_LR130515	473836	G	A	snp	missense_variant	EW033_RS02425		hypothetical protein	P127L	0.333333	3	SAUSA300_0376	hypothetical protein	SAUSA300_0376
NZ_LR130515_474265_GT_AG	0.0879	0.097	-1.31	0.0845		NZ_LR130515	474265	GT	AG	complex	missense_variant	EW033_RS00100				0.5	2
NZ_LR130515_481040_AC_GT	0.0879	0.097	-1.31	0.0845		NZ_LR130515	481040	AC	GT	complex	missense_variant	EW033_RS00100				0.2	5
NZ_LR130515_523805_A_G	0.0879	0.097	-1.31	0.0845		NZ_LR130515	523805	A	G	snp	missense_variant	EW033_RS00100				0.5	2
NZ_LR130515_524520_GTAGCG_ATAACA	0.0879	0.097	-1.31	0.0845	SAUSA300_0394	NZ_LR130515	524520	GTAGCG	ATAACA	complex	missense_variant	EW033_RS02710		SDR family oxidoreductase	R194C	0.25	4	SAUSA300_0394	FAD/NAD(P)-binding Rossmann fold superfamily protein	SAUSA300_0394	SAUSA300_0393-SAUSA300_0394
NZ_LR130515_524817_GCTC_ACAT	0.0879	0.097	-1.31	0.0845	SAUSA300_0394	NZ_LR130515	524817	GCTC	ACAT	complex	missense_variant	EW033_RS02710		SDR family oxidoreductase	S96C	0.166667	6	SAUSA300_0394	FAD/NAD(P)-binding Rossmann fold superfamily protein	SAUSA300_0394	SAUSA300_0393-SAUSA300_0394
NZ_LR130515_526112_T_A	0.0879	0.097	-1.31	0.0845	ssl1	NZ_LR130515	526112	T	A	snp	missense_variant	EW033_RS02715		superantigen-like protein SSL1	N179K	0.5	2	SAUSA300_0395	superantigen-like protein	SAUSA300_0395
NZ_LR130515_526222_CTAAGATTAAT_AACAAATACAA	0.0879	0.097	-1.31	0.0845	ssl1	NZ_LR130515	526222	CTAAGATTAAT	AACAAATACAA	complex	missense_variant	EW033_RS02715		superantigen-like protein SSL1	TKIN216KQIQ	0.125	8	SAUSA300_0395	superantigen-like protein	SAUSA300_0395
NZ_LR130515_526884_G_T	0.0879	0.097	-1.31	0.0845	ssl2	NZ_LR130515	526884	G	T	snp	missense_variant	EW033_RS02720		superantigen-like protein SSL2	A115S	0.5	2	SAUSA300_0396	superantigen-like protein	set7
NZ_LR130515_527037_ATT_GTC	0.0879	0.097	-1.31	0.0845	ssl2	NZ_LR130515	527037	ATT	GTC	complex	missense_variant	EW033_RS02720		superantigen-like protein SSL2	I166V	0.333333	3	SAUSA300_0396	superantigen-like protein	set7
NZ_LR130515_530594_GTTTTCA_TTATTCG	0.0879	0.097	-1.31	0.0845	ssl5	NZ_LR130515	530594	GTTTTCA	TTATTCG	complex	missense_variant	EW033_RS02740		superantigen-like protein SSL5	F119Y	0.5	2	SAUSA300_0399	superantigen-like protein 5	SAUSA300_0399
NZ_LR130515_534631_AACAACGA_GACAGCAT	0.0879	0.097	-1.31	0.0845	ssl9	NZ_LR130515	534631	AACAACGA	GACAGCAT	complex	missense_variant	EW033_RS02760		superantigen-like protein SSL9	TI5AL	0.166667	6	SAUSA300_0403	superantigen-like protein	SAUSA300_0403
[truncated: 25,494 more rows]

## Sheet: gene burden test
LOCUS_TAG	af	p_value	beta	variant_h2	unique_gene_symbol	CHROM	start	end	strand	length	BPH2947_gene	BPH2947_product	neb_locus_tag	neb_product	neb_gene	neb_operon_symbol
[truncated: 2,031 more rows]

## Sheet: variables
variable	comment
[truncated: 26 more rows]
