# Supplementary material for: A high-throughput cytotoxicity screening platform reveals agr-independent mutations in bacteraemia-associated Staphylococcus aureus that promote intracellular persistence
Source: eLife. 2023 Jun 8;12:e84778. doi: 10.7554/eLife.84778 (PMC10259494; doi:10.7554/eLife.84778)
Supplement: Supplementary file 8. — This analysis was performed in 100 replicated sets of phylogenetically independent genetic pairs. [file elife-84778-supp8.xlsx]

## Sheet: Pair replicates
replicate	pair_id	iso1	iso2	dist_denovo	PI_pair	delta_auc	pval	mrca	n_tips	tip_labels
1	BPH3648--BPH3262	BPH3648	BPH3262	63	FALSE	47.7002	0.015873	479	38	BPH2787,BPH3704,BPH3702,BPH3666,BPH3636,BPH3692,BPH3668,BPH3710,BPH3706,BPH3757,BPH3658,BPH3672,BPH3648,BPH3650,BPH3652,BPH3694,BPH3755,BPH3640,BPH3688,BPH3662,BPH2869,BPH3670,BPH3638,BPH3202,BPH3643,BPH3700,BPH3674,BPH3753,BPH3682,BPH3686,BPH3660,BPH3684,BPH3208,BPH3250,BPH3220,BPH3260,BPH3306,BPH3262
1	BPH3743--BPH3529	BPH3743	BPH3529	77	FALSE	-52.9045	0.004329	428	15	BPH3401,BPH3493,BPH3742,BPH3417,BPH3743,BPH3744,BPH3745,BPH3463,BPH3741,BPH3433,BPH3748,BPH3523,BPH3527,BPH3529,BPH3739
1	BPH2823--BPH2763	BPH2823	BPH2763	157	FALSE	-11.6822	0.00865801	657	3	BPH2763,BPH2764,BPH2823
1	BPH2981--BPH2978	BPH2981	BPH2978	12	FALSE	-10.1369	0.7	409	6	BPH2981,BPH2977,BPH2979,BPH2978,BPH2976,BPH2980
1	BPH3372--BPH3435	BPH3372	BPH3435	32	FALSE	3.92783	0.484848	416	9	BPH2710,BPH2780,BPH2896,BPH3382,BPH3435,BPH2726,BPH2727,BPH3376,BPH3372
1	BPH2747--BPH2748	BPH2747	BPH2748	1	FALSE	6.33616	0.662338	427	2	BPH2747,BPH2748
1	BPH3459--BPH3462	BPH3459	BPH3462	2	FALSE	-27.469	0.171429	628	2	BPH3459,BPH3462
1	BPH3547--BPH3356	BPH3547	BPH3356	65	FALSE	-68.7166	0.004329	462	9	BPH2779,BPH3394,BPH2907,BPH3328,BPH3485,BPH3511,BPH3356,BPH3737,BPH3547
1	BPH2803--BPH2801	BPH2803	BPH2801	24	FALSE	-3.66723	0.572761	707	3	BPH2801,BPH2802,BPH2803
1	BPH3366--BPH3362	BPH3366	BPH3362	17	TRUE	-60.6017	0.0021645	415	2	BPH3362,BPH3366
1	BPH2751--BPH2750	BPH2751	BPH2750	1	FALSE	12.9316	0.588745	764	2	BPH2750,BPH2751
1	BPH2959--BPH2961	BPH2959	BPH2961	0	FALSE	-11.8141	0.588745	643	3	BPH2959,BPH2960,BPH2961
1	BPH3664--BPH3632	BPH3664	BPH3632	22	FALSE	-11.8277	0.699134	516	3	BPH3632,BPH3696,BPH3664
1	BPH3403--BPH3431	BPH3403	BPH3431	64	FALSE	-24.4388	0.0822511	444	10	BPH2947,BPH2948,BPH3439,BPH3453,BPH3457,BPH3431,BPH3469,BPH3403,BPH3413,BPH3499
1	BPH2873--BPH2872	BPH2873	BPH2872	0	FALSE	12.0854	0.536797	646	2	BPH2872,BPH2873
1	BPH3545--BPH3443	BPH3545	BPH3443	42	FALSE	3.76094	1	473	3	BPH3346,BPH3443,BPH3545
1	BPH3746--BPH3423	BPH3746	BPH3423	0	FALSE	12.572	0.257143	601	3	BPH3423,BPH3434,BPH3746
1	BPH3360--BPH3535	BPH3360	BPH3535	91	FALSE	2.09426	0.699134	471	3	BPH3360,BPH3535,BPH3752
1	BPH2991--BPH2990	BPH2991	BPH2990	0	FALSE	-1.76518	0.588745	544	2	BPH2990,BPH2991
1	BPH3276--BPH3316	BPH3276	BPH3316	93	FALSE	-9.72843	1	523	4	BPH3236,BPH3258,BPH3316,BPH3276
1	BPH2728--BPH2729	BPH2728	BPH2729	5	TRUE	-109.969	4.11353e-05	730	3	BPH2728,BPH2729,BPH2730
1	BPH2926--BPH2922	BPH2926	BPH2922	5	FALSE	19.7389	0.004329	584	4	BPH2922,BPH2923,BPH2924,BPH2926
1	BPH3479--BPH3477	BPH3479	BPH3477	16	FALSE	-3.12279	0.792208	736	2	BPH3477,BPH3479
1	BPH2832--BPH2833	BPH2832	BPH2833	0	FALSE	14.6894	0.025974	546	2	BPH2832,BPH2833
1	BPH2824--BPH2825	BPH2824	BPH2825	0	FALSE	-1.84537	0.937229	414	2	BPH2824,BPH2825
1	BPH2800--BPH2799	BPH2800	BPH2799	0	FALSE	-10.6009	0.490842	459	2	BPH2799,BPH2800
1	BPH3596--BPH3628	BPH3596	BPH3628	20	FALSE	15.1389	0.329004	581	2	BPH3596,BPH3628
1	BPH3226--BPH3204	BPH3226	BPH3204	4	FALSE	-30.7573	0.730159	520	3	BPH3204,BPH3226,BPH3292
1	BPH3733--BPH3336	BPH3733	BPH3336	2	FALSE	115.831	0.004329	649	2	BPH3336,BPH3733
1	BPH2842--BPH2843	BPH2842	BPH2843	0	FALSE	7.19808	0.24026	686	2	BPH2842,BPH2843
1	BPH2815--BPH2814	BPH2815	BPH2814	0	FALSE	6.16038	0.484848	577	3	BPH2812,BPH2815,BPH2814
1	BPH3268--BPH3304	BPH3268	BPH3304	2	FALSE	-18.7354	0.792208	662	2	BPH3268,BPH3304
1	BPH2819--BPH2820	BPH2819	BPH2820	2	FALSE	15.0066	0.24026	629	2	BPH2819,BPH2820
1	BPH2987--BPH2988	BPH2987	BPH2988	0	FALSE	-15.2499	0.420635	770	2	BPH2987,BPH2988
1	BPH3338--BPH3340	BPH3338	BPH3340	7	FALSE	-145.303	0.0285714	740	3	BPH2792,BPH3340,BPH3338
1	BPH3216--BPH3270	BPH3216	BPH3270	2	FALSE	9.95811	0.555556	567	2	BPH3216,BPH3270
1	BPH3352--BPH3736	BPH3352	BPH3736	2	FALSE	13.9241	0.588745	737	2	BPH3352,BPH3736
1	BPH2887--BPH2888	BPH2887	BPH2888	0	FALSE	2.50728	0.914286	735	2	BPH2887,BPH2888
1	BPH3284--BPH3244	BPH3284	BPH3244	5	FALSE	3.35133	0.792208	527	2	BPH3244,BPH3284
1	BPH2771--BPH2770	BPH2771	BPH2770	2	FALSE	-3.1817	0.937229	739	2	BPH2770,BPH2771
1	BPH2966--BPH2965	BPH2966	BPH2965	0	FALSE	-9.15242	0.24026	531	2	BPH2965,BPH2966
1	BPH2858--BPH3750	BPH2858	BPH3750	35	FALSE	48.8298	0.393939	676	5	BPH2720,BPH2742,BPH2858,BPH3750,BPH3751
1	BPH2860--BPH2784	BPH2860	BPH2784	147	TRUE	-114.455	0.00952381	661	2	BPH2784,BPH2860
1	BPH2778--BPH2777	BPH2778	BPH2777	0	FALSE	7.81792	0.0930736	759	2	BPH2777,BPH2778
1	BPH2709--BPH2708	BPH2709	BPH2708	1	FALSE	-7.26096	0.420635	591	2	BPH2708,BPH2709
1	BPH2754--BPH2755	BPH2754	BPH2755	0	FALSE	-2.77606	1	630	2	BPH2754,BPH2755
1	BPH2974--BPH2975	BPH2974	BPH2975	0	FALSE	6.43345	0.428571	768	3	BPH2973,BPH2975,BPH2974
1	BPH3482--BPH3508	BPH3482	BPH3508	8	FALSE	19.4178	0.114286	600	2	BPH3482,BPH3508
1	BPH3460--BPH3389	BPH3460	BPH3389	1	FALSE	-50.9954	0.428571	560	2	BPH3389,BPH3460
1	BPH3481--BPH3396	BPH3481	BPH3396	7	FALSE	13.779	0.0666667	671	2	BPH3396,BPH3481
1	BPH2761--BPH2752	BPH2761	BPH2752	0	FALSE	43.1603	0.031746	750	2	BPH2752,BPH2761
1	BPH2857--BPH2852	BPH2857	BPH2852	1	FALSE	-9.66952	0.484848	664	2	BPH2852,BPH2857
1	BPH3348--BPH3735	BPH3348	BPH3735	3	FALSE	5.82626	0.177489	443	2	BPH3348,BPH3735
1	BPH2952--BPH2953	BPH2952	BPH2953	2	FALSE	9.27368	0.177489	726	2	BPH2952,BPH2953
1	BPH2718--BPH2946	BPH2718	BPH2946	46	FALSE	11.3894	0.588745	457	2	BPH2718,BPH2946
1	BPH3588--BPH3584	BPH3588	BPH3584	9	FALSE	-6.1861	0.484848	705	2	BPH3584,BPH3588
1	BPH2714--BPH2713	BPH2714	BPH2713	2	FALSE	-17.3353	0.177489	716	2	BPH2713,BPH2714
1	BPH3489--BPH3501	BPH3489	BPH3501	2	FALSE	9.97263	0.125541	690	2	BPH3489,BPH3501
1	BPH2942--BPH2943	BPH2942	BPH2943	0	FALSE	-3.36698	0.699134	636	2	BPH2942,BPH2943
1	BPH2850--BPH2849	BPH2850	BPH2849	1	FALSE	-7.89025	0.662338	645	2	BPH2849,BPH2850
1	BPH3274--BPH3282	BPH3274	BPH3282	1	FALSE	85.2295	0.015873	648	2	BPH3274,BPH3282
1	BPH3734--BPH3337	BPH3734	BPH3337	3	FALSE	-3.64288	0.818182	532	2	BPH3337,BPH3734
1	BPH2861--BPH2862	BPH2861	BPH2862	1	FALSE	23.7964	0.428571	765	2	BPH2861,BPH2862
1	BPH2962--BPH2964	BPH2962	BPH2964	0	FALSE	-39.886	0.0021645	596	3	BPH2962,BPH2963,BPH2964
1	BPH2807--BPH2808	BPH2807	BPH2808	0	FALSE	-6.67639	0.407867	688	2	BPH2807,BPH2808
1	BPH2863--BPH2864	BPH2863	BPH2864	0	FALSE	1.65592	0.937229	755	2	BPH2863,BPH2864
1	BPH2881--BPH2882	BPH2881	BPH2882	12	FALSE	1.33085	0.914286	615	2	BPH2881,BPH2882
1	BPH3246--BPH3294	BPH3246	BPH3294	8	FALSE	23.2762	0.0411255	580	2	BPH3246,BPH3294
1	BPH2700--BPH2876	BPH2700	BPH2876	139	FALSE	37.4043	0.179654	655	3	BPH2700,BPH2876,BPH2877
1	BPH3437--BPH3749	BPH3437	BPH3749	4	FALSE	2.2445	0.699134	693	2	BPH3437,BPH3749
1	BPH2891--BPH2890	BPH2891	BPH2890	0	FALSE	-16.8054	0.150794	659	2	BPH2890,BPH2891
1	BPH2841--BPH2840	BPH2841	BPH2840	0	FALSE	1.64172	0.484848	548	2	BPH2840,BPH2841
1	BPH2738--BPH2737	BPH2738	BPH2737	1	FALSE	9.31894	0.0649351	557	2	BPH2737,BPH2738
1	BPH3524--BPH3548	BPH3524	BPH3548	1	FALSE	39.9747	0.114286	757	2	BPH3524,BPH3548
1	BPH3427--BPH3747	BPH3427	BPH3747	1	FALSE	7.72504	0.309524	692	2	BPH3427,BPH3747
1	BPH3568--BPH3590	BPH3568	BPH3590	37	TRUE	-46.2301	0.017316	695	2	BPH3590,BPH3568
1	BPH3381--BPH3738	BPH3381	BPH3738	2	FALSE	-6.95866	0.930736	725	2	BPH3381,BPH3738
1	BPH2883--BPH2884	BPH2883	BPH2884	0	FALSE	0.76274	0.84127	634	2	BPH2883,BPH2884
1	BPH2704--BPH2705	BPH2704	BPH2705	0	FALSE	36.4124	0.0151515	700	2	BPH2704,BPH2705
1	BPH2867--BPH2866	BPH2867	BPH2866	2	FALSE	22.3157	0.24026	558	2	BPH2866,BPH2867
1	BPH3612--BPH3602	BPH3612	BPH3602	11	FALSE	7.65837	0.309524	681	2	BPH3612,BPH3602
1	BPH2898--BPH2897	BPH2898	BPH2897	0	FALSE	-2.0829	0.937229	772	2	BPH2897,BPH2898
2	BPH3744--BPH3742	BPH3744	BPH3742	8	FALSE	9.13153	0.662338	430	9	BPH3401,BPH3493,BPH3742,BPH3417,BPH3743,BPH3744,BPH3745,BPH3463,BPH3741
2	BPH3643--BPH2869	BPH3643	BPH2869	47	FALSE	81.2141	0.004329	480	32	BPH2787,BPH3704,BPH3702,BPH3666,BPH3636,BPH3692,BPH3668,BPH3710,BPH3706,BPH3757,BPH3658,BPH3672,BPH3648,BPH3650,BPH3652,BPH3694,BPH3755,BPH3640,BPH3688,BPH3662,BPH2869,BPH3670,BPH3638,BPH3202,BPH3643,BPH3700,BPH3674,BPH3753,BPH3682,BPH3686,BPH3660,BPH3684
2	BPH3435--BPH3372	BPH3435	BPH3372	39	FALSE	-3.92783	0.484848	416	9	BPH2710,BPH2780,BPH2896,BPH3382,BPH3435,BPH2726,BPH2727,BPH3376,BPH3372
2	BPH3250--BPH3262	BPH3250	BPH3262	9	FALSE	-42.4449	0.0952381	511	6	BPH3208,BPH3250,BPH3220,BPH3260,BPH3306,BPH3262
2	BPH2977--BPH2976	BPH2977	BPH2976	0	FALSE	-22.9356	0.333333	410	5	BPH2977,BPH2979,BPH2978,BPH2976,BPH2980
2	BPH3403--BPH3439	BPH3403	BPH3439	15	FALSE	-55.4589	0.004329	444	10	BPH2947,BPH2948,BPH3439,BPH3453,BPH3457,BPH3431,BPH3469,BPH3403,BPH3413,BPH3499
2	BPH2925--BPH2924	BPH2925	BPH2924	0	FALSE	17.3007	0.179654	583	5	BPH2922,BPH2923,BPH2924,BPH2926,BPH2925
2	BPH3423--BPH3434	BPH3423	BPH3434	0	FALSE	-41.9255	0.015873	601	3	BPH3423,BPH3434,BPH3746
2	BPH3320--BPH3204	BPH3320	BPH3204	35	FALSE	-57.1148	1	519	4	BPH3204,BPH3226,BPH3292,BPH3320
2	BPH3747--BPH3427	BPH3747	BPH3427	2	FALSE	-7.72504	0.309524	692	2	BPH3427,BPH3747
2	BPH2850--BPH2849	BPH2850	BPH2849	1	FALSE	-7.89025	0.662338	645	2	BPH2849,BPH2850
2	BPH2763--BPH2764	BPH2763	BPH2764	29	FALSE	152.852	0.0011655	658	2	BPH2763,BPH2764
2	BPH2943--BPH2942	BPH2943	BPH2942	0	FALSE	3.36698	0.699134	636	2	BPH2942,BPH2943
2	BPH3443--BPH3545	BPH3443	BPH3545	44	FALSE	-3.76094	1	473	3	BPH3346,BPH3443,BPH3545
2	BPH2824--BPH2825	BPH2824	BPH2825	0	FALSE	-1.84537	0.937229	414	2	BPH2824,BPH2825
2	BPH3750--BPH2858	BPH3750	BPH2858	34	FALSE	-48.8298	0.393939	676	5	BPH2720,BPH2742,BPH2858,BPH3750,BPH3751
2	BPH3511--BPH3356	BPH3511	BPH3356	66	FALSE	-1.16091	1	466	5	BPH3328,BPH3485,BPH3511,BPH3356,BPH3737
2	BPH3548--BPH3524	BPH3548	BPH3524	0	FALSE	-39.9747	0.114286	757	2	BPH3524,BPH3548
2	BPH3749--BPH3437	BPH3749	BPH3437	4	FALSE	-2.2445	0.699134	693	2	BPH3437,BPH3749
2	BPH2946--BPH2799	BPH2946	BPH2799	57	FALSE	-29.014	0.0021645	456	5	BPH2718,BPH2946,BPH2798,BPH2799,BPH2800
2	BPH2861--BPH2862	BPH2861	BPH2862	1	FALSE	23.7964	0.428571	765	2	BPH2861,BPH2862
2	BPH3479--BPH3477	BPH3479	BPH3477	16	FALSE	-3.12279	0.792208	736	2	BPH3477,BPH3479
2	BPH3276--BPH3258	BPH3276	BPH3258	122	FALSE	26.9911	0.536797	523	4	BPH3236,BPH3258,BPH3316,BPH3276
2	BPH3535--BPH3752	BPH3535	BPH3752	0	FALSE	13.9253	0.132035	472	2	BPH3535,BPH3752
2	BPH3274--BPH3282	BPH3274	BPH3282	1	FALSE	85.2295	0.015873	648	2	BPH3274,BPH3282
2	BPH3696--BPH3632	BPH3696	BPH3632	2	FALSE	-17.3031	0.309524	517	2	BPH3632,BPH3696
2	BPH2728--BPH2729	BPH2728	BPH2729	5	TRUE	-109.969	4.11353e-05	730	3	BPH2728,BPH2729,BPH2730
2	BPH3340--BPH3338	BPH3340	BPH3338	6	FALSE	145.303	0.0285714	740	3	BPH2792,BPH3340,BPH3338
2	BPH2884--BPH2883	BPH2884	BPH2883	0	FALSE	-0.76274	0.84127	634	2	BPH2883,BPH2884
2	BPH3523--BPH3529	BPH3523	BPH3529	44	FALSE	-50.988	0.00865801	439	4	BPH3523,BPH3527,BPH3529,BPH3739
2	BPH2898--BPH2897	BPH2898	BPH2897	0	FALSE	-2.0829	0.937229	772	2	BPH2897,BPH2898
2	BPH2802--BPH2801	BPH2802	BPH2801	9	FALSE	-16.3863	0.141858	708	2	BPH2801,BPH2802
2	BPH3352--BPH3736	BPH3352	BPH3736	2	FALSE	13.9241	0.588745	737	2	BPH3352,BPH3736
2	BPH2748--BPH2747	BPH2748	BPH2747	2	FALSE	-6.33616	0.662338	427	2	BPH2747,BPH2748
2	BPH3389--BPH3460	BPH3389	BPH3460	0	FALSE	50.9954	0.428571	560	2	BPH3389,BPH3460
2	BPH2832--BPH2831	BPH2832	BPH2831	0	FALSE	1.12586	0.792208	545	3	BPH2831,BPH2832,BPH2833
2	BPH2873--BPH2872	BPH2873	BPH2872	0	FALSE	12.0854	0.536797	646	2	BPH2872,BPH2873
2	BPH2852--BPH2857	BPH2852	BPH2857	1	FALSE	9.66952	0.484848	664	2	BPH2852,BPH2857
2	BPH2965--BPH2966	BPH2965	BPH2966	0	FALSE	9.15242	0.24026	531	2	BPH2965,BPH2966
2	BPH3348--BPH3735	BPH3348	BPH3735	3	FALSE	5.82626	0.177489	443	2	BPH3348,BPH3735
2	BPH3294--BPH3246	BPH3294	BPH3246	6	FALSE	-23.2762	0.0411255	580	2	BPH3246,BPH3294
2	BPH3734--BPH3337	BPH3734	BPH3337	3	FALSE	-3.64288	0.818182	532	2	BPH3337,BPH3734
2	BPH2961--BPH2959	BPH2961	BPH2959	0	FALSE	11.8141	0.588745	643	3	BPH2959,BPH2960,BPH2961
2	BPH2964--BPH2963	BPH2964	BPH2963	5	FALSE	40.5691	0.0021645	597	2	BPH2963,BPH2964
2	BPH3304--BPH3268	BPH3304	BPH3268	2	FALSE	18.7354	0.792208	662	2	BPH3268,BPH3304
2	BPH2755--BPH2754	BPH2755	BPH2754	0	FALSE	2.77606	1	630	2	BPH2754,BPH2755
2	BPH2761--BPH2752	BPH2761	BPH2752	0	FALSE	43.1603	0.031746	750	2	BPH2752,BPH2761
2	BPH2990--BPH2989	BPH2990	BPH2989	0	FALSE	12.2099	0.0649351	543	3	BPH2989,BPH2990,BPH2991
2	BPH3612--BPH3602	BPH3612	BPH3602	11	FALSE	7.65837	0.309524	681	2	BPH3612,BPH3602
2	BPH2815--BPH2812	BPH2815	BPH2812	0	FALSE	2.00875	0.937229	578	2	BPH2812,BPH2815
2	BPH2779--BPH3394	BPH2779	BPH3394	38	FALSE	1.75762	0.662338	465	2	BPH2779,BPH3394
2	BPH2770--BPH2771	BPH2770	BPH2771	2	FALSE	3.1817	0.937229	739	2	BPH2770,BPH2771
2	BPH2842--BPH2843	BPH2842	BPH2843	0	FALSE	7.19808	0.24026	686	2	BPH2842,BPH2843
2	BPH2777--BPH2778	BPH2777	BPH2778	0	FALSE	-7.81792	0.0930736	759	2	BPH2777,BPH2778
2	BPH2714--BPH2713	BPH2714	BPH2713	2	FALSE	-17.3353	0.177489	716	2	BPH2713,BPH2714
2	BPH3366--BPH3362	BPH3366	BPH3362	17	TRUE	-60.6017	0.0021645	415	2	BPH3362,BPH3366
2	BPH2890--BPH2891	BPH2890	BPH2891	0	FALSE	16.8054	0.150794	659	2	BPH2890,BPH2891
2	BPH3508--BPH3482	BPH3508	BPH3482	8	FALSE	-19.4178	0.114286	600	2	BPH3482,BPH3508
2	BPH2807--BPH2808	BPH2807	BPH2808	0	FALSE	-6.67639	0.407867	688	2	BPH2807,BPH2808
2	BPH2988--BPH2987	BPH2988	BPH2987	0	FALSE	15.2499	0.420635	770	2	BPH2987,BPH2988
2	BPH2705--BPH2704	BPH2705	BPH2704	0	TRUE	-36.4124	0.0151515	700	2	BPH2704,BPH2705
2	BPH2840--BPH2841	BPH2840	BPH2841	0	FALSE	-1.64172	0.484848	548	2	BPH2840,BPH2841
2	BPH2738--BPH2737	BPH2738	BPH2737	1	FALSE	9.31894	0.0649351	557	2	BPH2737,BPH2738
2	BPH3748--BPH3433	BPH3748	BPH3433	0	FALSE	26.3053	0.00952381	438	2	BPH3433,BPH3748
2	BPH3244--BPH3284	BPH3244	BPH3284	5	FALSE	-3.35133	0.792208	527	2	BPH3244,BPH3284
2	BPH2974--BPH2975	BPH2974	BPH2975	0	FALSE	6.43345	0.428571	768	3	BPH2973,BPH2975,BPH2974
2	BPH3459--BPH3462	BPH3459	BPH3462	2	FALSE	-27.469	0.171429	628	2	BPH3459,BPH3462
2	BPH3216--BPH3270	BPH3216	BPH3270	2	FALSE	9.95811	0.555556	567	2	BPH3216,BPH3270
2	BPH3588--BPH3584	BPH3588	BPH3584	9	FALSE	-6.1861	0.484848	705	2	BPH3584,BPH3588
2	BPH2867--BPH2866	BPH2867	BPH2866	2	FALSE	22.3157	0.24026	558	2	BPH2866,BPH2867
2	BPH3396--BPH3481	BPH3396	BPH3481	7	FALSE	-13.779	0.0666667	671	2	BPH3396,BPH3481
2	BPH2877--BPH2876	BPH2877	BPH2876	4	FALSE	20.6942	0.699134	656	2	BPH2876,BPH2877
2	BPH3628--BPH3596	BPH3628	BPH3596	21	FALSE	-15.1389	0.329004	581	2	BPH3596,BPH3628
2	BPH3568--BPH3590	BPH3568	BPH3590	37	TRUE	-46.2301	0.017316	695	2	BPH3590,BPH3568
2	BPH2820--BPH2819	BPH2820	BPH2819	2	FALSE	-15.0066	0.24026	629	2	BPH2819,BPH2820
2	BPH2887--BPH2888	BPH2887	BPH2888	0	FALSE	2.50728	0.914286	735	2	BPH2887,BPH2888
2	BPH2881--BPH2882	BPH2881	BPH2882	12	FALSE	1.33085	0.914286	615	2	BPH2881,BPH2882
2	BPH3381--BPH3738	BPH3381	BPH3738	2	FALSE	-6.95866	0.930736	725	2	BPH3381,BPH3738
2	BPH2860--BPH2784	BPH2860	BPH2784	147	TRUE	-114.455	0.00952381	661	2	BPH2784,BPH2860
2	BPH3501--BPH3489	BPH3501	BPH3489	3	FALSE	-9.97263	0.125541	690	2	BPH3489,BPH3501
2	BPH2863--BPH2864	BPH2863	BPH2864	0	FALSE	1.65592	0.937229	755	2	BPH2863,BPH2864
2	BPH2953--BPH2952	BPH2953	BPH2952	2	FALSE	-9.27368	0.177489	726	2	BPH2952,BPH2953
2	BPH2708--BPH2709	BPH2708	BPH2709	0	FALSE	7.26096	0.420635	591	2	BPH2708,BPH2709
2	BPH3733--BPH3336	BPH3733	BPH3336	2	FALSE	115.831	0.004329	649	2	BPH3336,BPH3733
2	BPH2750--BPH2751	BPH2750	BPH2751	2	FALSE	-12.9316	0.588745	764	2	BPH2750,BPH2751
3	BPH3493--BPH3741	BPH3493	BPH3741	4	FALSE	25.1683	0.0649351	430	9	BPH3401,BPH3493,BPH3742,BPH3417,BPH3743,BPH3744,BPH3745,BPH3463,BPH3741
3	BPH3704--BPH3692	BPH3704	BPH3692	20	FALSE	21.4962	0.257143	485	17	BPH2787,BPH3704,BPH3702,BPH3666,BPH3636,BPH3692,BPH3668,BPH3710,BPH3706,BPH3757,BPH3658,BPH3672,BPH3648,BPH3650,BPH3652,BPH3694,BPH3755
3	BPH3413--BPH3403	BPH3413	BPH3403	5	FALSE	-2.20539	1	452	2	BPH3403,BPH3413
3	BPH3643--BPH3686	BPH3643	BPH3686	49	FALSE	33.4192	0.0930736	505	6	BPH3643,BPH3700,BPH3674,BPH3753,BPH3682,BPH3686
3	BPH3316--BPH3258	BPH3316	BPH3258	98	FALSE	36.7196	0.393939	524	3	BPH3236,BPH3258,BPH3316
3	BPH3382--BPH3435	BPH3382	BPH3435	16	FALSE	-57.2537	0.0021645	417	5	BPH2710,BPH2780,BPH2896,BPH3382,BPH3435
3	BPH2973--BPH2974	BPH2973	BPH2974	0	FALSE	-33.1289	0.0519481	768	3	BPH2973,BPH2975,BPH2974
3	BPH2963--BPH2964	BPH2963	BPH2964	5	TRUE	-40.5691	0.0021645	597	2	BPH2963,BPH2964
3	BPH3750--BPH3751	BPH3750	BPH3751	0	TRUE	-113.455	0.00865801	679	2	BPH3750,BPH3751
3	BPH2977--BPH2978	BPH2977	BPH2978	1	FALSE	15.6816	0.4	412	3	BPH2977,BPH2979,BPH2978
3	BPH3320--BPH3292	BPH3320	BPH3292	40	FALSE	-23.4596	0.792208	519	4	BPH3204,BPH3226,BPH3292,BPH3320
3	BPH2718--BPH2799	BPH2718	BPH2799	52	FALSE	-17.6246	0.179654	456	5	BPH2718,BPH2946,BPH2798,BPH2799,BPH2800
3	BPH2840--BPH2841	BPH2840	BPH2841	0	FALSE	-1.64172	0.484848	548	2	BPH2840,BPH2841
3	BPH2730--BPH2728	BPH2730	BPH2728	0	FALSE	-6.59919	0.604813	730	3	BPH2728,BPH2729,BPH2730
3	BPH2942--BPH2943	BPH2942	BPH2943	0	FALSE	-3.36698	0.699134	636	2	BPH2942,BPH2943
3	BPH2876--BPH2877	BPH2876	BPH2877	4	FALSE	-20.6942	0.699134	656	2	BPH2876,BPH2877
3	BPH2891--BPH2890	BPH2891	BPH2890	0	FALSE	-16.8054	0.150794	659	2	BPH2890,BPH2891
3	BPH3338--BPH3340	BPH3338	BPH3340	7	FALSE	-145.303	0.0285714	740	3	BPH2792,BPH3340,BPH3338
3	BPH2708--BPH2709	BPH2708	BPH2709	0	FALSE	7.26096	0.420635	591	2	BPH2708,BPH2709
3	BPH3527--BPH3529	BPH3527	BPH3529	48	FALSE	-31.413	0.0649351	439	4	BPH3523,BPH3527,BPH3529,BPH3739
3	BPH3262--BPH3220	BPH3262	BPH3220	15	FALSE	59.703	0.0519481	511	6	BPH3208,BPH3250,BPH3220,BPH3260,BPH3306,BPH3262
3	BPH2923--BPH2924	BPH2923	BPH2924	3	FALSE	117.815	0.0021645	585	3	BPH2922,BPH2923,BPH2924
3	BPH3489--BPH3501	BPH3489	BPH3501	2	FALSE	9.97263	0.125541	690	2	BPH3489,BPH3501
3	BPH3590--BPH3568	BPH3590	BPH3568	37	FALSE	46.2301	0.017316	695	2	BPH3590,BPH3568
3	BPH2713--BPH2714	BPH2713	BPH2714	2	FALSE	17.3353	0.177489	716	2	BPH2713,BPH2714
3	BPH3274--BPH3282	BPH3274	BPH3282	1	FALSE	85.2295	0.015873	648	2	BPH3274,BPH3282
3	BPH3396--BPH3481	BPH3396	BPH3481	7	FALSE	-13.779	0.0666667	671	2	BPH3396,BPH3481
3	BPH2802--BPH2803	BPH2802	BPH2803	30	FALSE	-12.719	0.393939	707	3	BPH2801,BPH2802,BPH2803
3	BPH2726--BPH2727	BPH2726	BPH2727	16	FALSE	12.9882	0.138791	423	2	BPH2726,BPH2727
3	BPH3437--BPH3749	BPH3437	BPH3749	4	FALSE	2.2445	0.699134	693	2	BPH3437,BPH3749
3	BPH3535--BPH3752	BPH3535	BPH3752	0	FALSE	13.9253	0.132035	472	2	BPH3535,BPH3752
3	BPH2812--BPH2815	BPH2812	BPH2815	0	FALSE	-2.00875	0.937229	578	2	BPH2812,BPH2815
3	BPH2863--BPH2864	BPH2863	BPH2864	0	FALSE	1.65592	0.937229	755	2	BPH2863,BPH2864
3	BPH3748--BPH3433	BPH3748	BPH3433	0	FALSE	26.3053	0.00952381	438	2	BPH3433,BPH3748
3	BPH2777--BPH2778	BPH2777	BPH2778	0	FALSE	-7.81792	0.0930736	759	2	BPH2777,BPH2778
3	BPH3737--BPH3485	BPH3737	BPH3485	68	FALSE	-68.9408	0.0822511	466	5	BPH3328,BPH3485,BPH3511,BPH3356,BPH3737
3	BPH2858--BPH2720	BPH2858	BPH2720	38	TRUE	-79.6552	0.0021645	677	3	BPH2720,BPH2742,BPH2858
3	BPH2820--BPH2819	BPH2820	BPH2819	2	FALSE	-15.0066	0.24026	629	2	BPH2819,BPH2820
3	BPH3304--BPH3268	BPH3304	BPH3268	2	FALSE	18.7354	0.792208	662	2	BPH3268,BPH3304
3	BPH2857--BPH2852	BPH2857	BPH2852	1	FALSE	-9.66952	0.484848	664	2	BPH2852,BPH2857
3	BPH2825--BPH2824	BPH2825	BPH2824	0	FALSE	1.84537	0.937229	414	2	BPH2824,BPH2825
3	BPH2872--BPH2873	BPH2872	BPH2873	0	FALSE	-12.0854	0.536797	646	2	BPH2872,BPH2873
3	BPH3508--BPH3482	BPH3508	BPH3482	8	FALSE	-19.4178	0.114286	600	2	BPH3482,BPH3508
3	BPH3362--BPH3366	BPH3362	BPH3366	18	FALSE	60.6017	0.0021645	415	2	BPH3362,BPH3366
3	BPH2961--BPH2960	BPH2961	BPH2960	0	FALSE	-0.570536	0.792208	644	2	BPH2960,BPH2961
3	BPH3394--BPH2779	BPH3394	BPH2779	39	FALSE	-1.75762	0.662338	465	2	BPH2779,BPH3394
3	BPH2952--BPH2953	BPH2952	BPH2953	2	FALSE	9.27368	0.177489	726	2	BPH2952,BPH2953
3	BPH2991--BPH2990	BPH2991	BPH2990	0	FALSE	-1.76518	0.588745	544	2	BPH2990,BPH2991
3	BPH2751--BPH2750	BPH2751	BPH2750	1	FALSE	12.9316	0.588745	764	2	BPH2750,BPH2751
3	BPH2831--BPH2833	BPH2831	BPH2833	0	FALSE	13.5635	0.0519481	545	3	BPH2831,BPH2832,BPH2833
3	BPH3244--BPH3284	BPH3244	BPH3284	5	FALSE	-3.35133	0.792208	527	2	BPH3244,BPH3284
3	BPH2705--BPH2704	BPH2705	BPH2704	0	TRUE	-36.4124	0.0151515	700	2	BPH2704,BPH2705
3	BPH2783--BPH2847	BPH2783	BPH2847	33	FALSE	6.23793	0.47619	684	4	BPH2783,BPH2842,BPH2843,BPH2847
3	BPH3670--BPH3638	BPH3670	BPH3638	31	FALSE	-15.5445	0.536797	502	3	BPH2869,BPH3670,BPH3638
3	BPH2966--BPH2965	BPH2966	BPH2965	0	FALSE	-9.15242	0.24026	531	2	BPH2965,BPH2966
3	BPH3439--BPH3457	BPH3439	BPH3457	15	FALSE	3.59932	0.662338	449	3	BPH3439,BPH3453,BPH3457
3	BPH3545--BPH3443	BPH3545	BPH3443	42	FALSE	3.76094	1	473	3	BPH3346,BPH3443,BPH3545
3	BPH3746--BPH3423	BPH3746	BPH3423	0	FALSE	12.572	0.257143	601	3	BPH3423,BPH3434,BPH3746
3	BPH3584--BPH3588	BPH3584	BPH3588	9	FALSE	6.1861	0.484848	705	2	BPH3584,BPH3588
3	BPH3632--BPH3696	BPH3632	BPH3696	1	FALSE	17.3031	0.309524	517	2	BPH3632,BPH3696
3	BPH3640--BPH3688	BPH3640	BPH3688	25	FALSE	-0.380341	1	501	2	BPH3640,BPH3688
3	BPH3462--BPH3459	BPH3462	BPH3459	1	FALSE	27.469	0.171429	628	2	BPH3459,BPH3462
3	BPH2888--BPH2887	BPH2888	BPH2887	0	FALSE	-2.50728	0.914286	735	2	BPH2887,BPH2888
3	BPH2784--BPH2860	BPH2784	BPH2860	134	FALSE	114.455	0.00952381	661	2	BPH2784,BPH2860
3	BPH3352--BPH3736	BPH3352	BPH3736	2	FALSE	13.9241	0.588745	737	2	BPH3352,BPH3736
3	BPH3336--BPH3733	BPH3336	BPH3733	2	TRUE	-115.831	0.004329	649	2	BPH3336,BPH3733
3	BPH3368--BPH3348	BPH3368	BPH3348	65	TRUE	-56.3119	0.004329	442	3	BPH3348,BPH3735,BPH3368
3	BPH2738--BPH2737	BPH2738	BPH2737	1	FALSE	9.31894	0.0649351	557	2	BPH2737,BPH2738
3	BPH2948--BPH2947	BPH2948	BPH2947	0	FALSE	23.761	0.179654	448	2	BPH2947,BPH2948
3	BPH2850--BPH2849	BPH2850	BPH2849	1	FALSE	-7.89025	0.662338	645	2	BPH2849,BPH2850
3	BPH3734--BPH3337	BPH3734	BPH3337	3	FALSE	-3.64288	0.818182	532	2	BPH3337,BPH3734
3	BPH3216--BPH3270	BPH3216	BPH3270	2	FALSE	9.95811	0.555556	567	2	BPH3216,BPH3270
3	BPH2764--BPH2763	BPH2764	BPH2763	30	TRUE	-152.852	0.0011655	658	2	BPH2763,BPH2764
3	BPH3684--BPH3660	BPH3684	BPH3660	52	FALSE	2.24833	0.818182	510	2	BPH3660,BPH3684
3	BPH2861--BPH2862	BPH2861	BPH2862	1	FALSE	23.7964	0.428571	765	2	BPH2861,BPH2862
3	BPH3294--BPH3246	BPH3294	BPH3246	6	FALSE	-23.2762	0.0411255	580	2	BPH3246,BPH3294
3	BPH2867--BPH2866	BPH2867	BPH2866	2	FALSE	22.3157	0.24026	558	2	BPH2866,BPH2867
3	BPH2752--BPH2761	BPH2752	BPH2761	0	TRUE	-43.1603	0.031746	750	2	BPH2752,BPH2761
3	BPH3596--BPH3628	BPH3596	BPH3628	20	FALSE	15.1389	0.329004	581	2	BPH3596,BPH3628
3	BPH2881--BPH2882	BPH2881	BPH2882	12	FALSE	1.33085	0.914286	615	2	BPH2881,BPH2882
3	BPH2987--BPH2988	BPH2987	BPH2988	0	FALSE	-15.2499	0.420635	770	2	BPH2987,BPH2988
3	BPH3602--BPH3612	BPH3602	BPH3612	10	FALSE	-7.65837	0.309524	681	2	BPH3612,BPH3602
3	BPH2748--BPH2747	BPH2748	BPH2747	2	FALSE	-6.33616	0.662338	427	2	BPH2747,BPH2748
3	BPH2898--BPH2897	BPH2898	BPH2897	0	FALSE	-2.0829	0.937229	772	2	BPH2897,BPH2898
3	BPH3389--BPH3460	BPH3389	BPH3460	0	FALSE	50.9954	0.428571	560	2	BPH3389,BPH3460
3	BPH2754--BPH2755	BPH2754	BPH2755	0	FALSE	-2.77606	1	630	2	BPH2754,BPH2755
3	BPH2807--BPH2808	BPH2807	BPH2808	0	FALSE	-6.67639	0.407867	688	2	BPH2807,BPH2808
3	BPH3479--BPH3477	BPH3479	BPH3477	16	FALSE	-3.12279	0.792208	736	2	BPH3477,BPH3479
3	BPH3381--BPH3738	BPH3381	BPH3738	2	FALSE	-6.95866	0.930736	725	2	BPH3381,BPH3738
3	BPH3427--BPH3747	BPH3427	BPH3747	1	FALSE	7.72504	0.309524	692	2	BPH3427,BPH3747
3	BPH2976--BPH2980	BPH2976	BPH2980	1	FALSE	1.7742	1	411	2	BPH2976,BPH2980
3	BPH2770--BPH2771	BPH2770	BPH2771	2	FALSE	3.1817	0.937229	739	2	BPH2770,BPH2771
3	BPH3524--BPH3548	BPH3524	BPH3548	1	FALSE	39.9747	0.114286	757	2	BPH3524,BPH3548
3	BPH2884--BPH2883	BPH2884	BPH2883	0	FALSE	-0.76274	0.84127	634	2	BPH2883,BPH2884
4	BPH3688--BPH3666	BPH3688	BPH3666	18	FALSE	43.8131	0.0930736	484	19	BPH2787,BPH3704,BPH3702,BPH3666,BPH3636,BPH3692,BPH3668,BPH3710,BPH3706,BPH3757,BPH3658,BPH3672,BPH3648,BPH3650,BPH3652,BPH3694,BPH3755,BPH3640,BPH3688
4	BPH3368--BPH3735	BPH3368	BPH3735	62	FALSE	-50.4856	0.0021645	442	3	BPH3348,BPH3735,BPH3368
4	BPH3527--BPH3742	BPH3527	BPH3742	30	FALSE	59.1621	0.00865801	428	15	BPH3401,BPH3493,BPH3742,BPH3417,BPH3743,BPH3744,BPH3745,BPH3463,BPH3741,BPH3433,BPH3748,BPH3523,BPH3527,BPH3529,BPH3739
4	BPH3423--BPH3746	BPH3423	BPH3746	0	FALSE	-12.572	0.257143	601	3	BPH3423,BPH3434,BPH3746
4	BPH2982--BPH2980	BPH2982	BPH2980	18	FALSE	0.269922	1	408	7	BPH2982,BPH2981,BPH2977,BPH2979,BPH2978,BPH2976,BPH2980
4	BPH2989--BPH2991	BPH2989	BPH2991	0	FALSE	-10.4447	0.179654	543	3	BPH2989,BPH2990,BPH2991
4	BPH3250--BPH3220	BPH3250	BPH3220	6	FALSE	17.2582	0.536797	513	3	BPH3208,BPH3250,BPH3220
4	BPH2862--BPH2861	BPH2862	BPH2861	2	FALSE	-23.7964	0.428571	765	2	BPH2861,BPH2862
4	BPH3246--BPH3294	BPH3246	BPH3294	8	FALSE	23.2762	0.0411255	580	2	BPH3246,BPH3294
4	BPH3612--BPH3602	BPH3612	BPH3602	11	FALSE	7.65837	0.309524	681	2	BPH3612,BPH3602
4	BPH2881--BPH2882	BPH2881	BPH2882	12	FALSE	1.33085	0.914286	615	2	BPH2881,BPH2882
4	BPH2860--BPH2784	BPH2860	BPH2784	147	TRUE	-114.455	0.00952381	661	2	BPH2784,BPH2860
4	BPH2780--BPH2896	BPH2780	BPH2896	2	FALSE	19.5432	0.24026	420	2	BPH2780,BPH2896
4	BPH2890--BPH2891	BPH2890	BPH2891	0	FALSE	16.8054	0.150794	659	2	BPH2890,BPH2891
4	BPH3753--BPH3660	BPH3753	BPH3660	43	FALSE	-25.6819	0.428571	504	8	BPH3643,BPH3700,BPH3674,BPH3753,BPH3682,BPH3686,BPH3660,BPH3684
4	BPH3356--BPH3545	BPH3356	BPH3545	62	FALSE	3.35637	1	461	15	BPH2779,BPH3394,BPH2907,BPH3328,BPH3485,BPH3511,BPH3356,BPH3737,BPH3547,BPH3360,BPH3535,BPH3752,BPH3346,BPH3443,BPH3545
4	BPH3403--BPH3457	BPH3403	BPH3457	26	FALSE	-51.8596	0.004329	444	10	BPH2947,BPH2948,BPH3439,BPH3453,BPH3457,BPH3431,BPH3469,BPH3403,BPH3413,BPH3499
4	BPH2926--BPH2923	BPH2926	BPH2923	3	FALSE	6.05121	0.484848	584	4	BPH2922,BPH2923,BPH2924,BPH2926
4	BPH2884--BPH2883	BPH2884	BPH2883	0	FALSE	-0.76274	0.84127	634	2	BPH2883,BPH2884
4	BPH2960--BPH2961	BPH2960	BPH2961	0	FALSE	0.570536	0.792208	644	2	BPH2960,BPH2961
4	BPH2820--BPH2819	BPH2820	BPH2819	2	FALSE	-15.0066	0.24026	629	2	BPH2819,BPH2820
4	BPH2813--BPH2814	BPH2813	BPH2814	0	FALSE	4.26774	0.662338	576	4	BPH2812,BPH2815,BPH2814,BPH2813
4	BPH3258--BPH3316	BPH3258	BPH3316	94	FALSE	-36.7196	0.393939	524	3	BPH3236,BPH3258,BPH3316
4	BPH2755--BPH2754	BPH2755	BPH2754	0	FALSE	2.77606	1	630	2	BPH2754,BPH2755
4	BPH3338--BPH3340	BPH3338	BPH3340	7	FALSE	-145.303	0.0285714	740	3	BPH2792,BPH3340,BPH3338
4	BPH2807--BPH2808	BPH2807	BPH2808	0	FALSE	-6.67639	0.407867	688	2	BPH2807,BPH2808
4	BPH2843--BPH2842	BPH2843	BPH2842	0	FALSE	-7.19808	0.24026	686	2	BPH2842,BPH2843
4	BPH2737--BPH2738	BPH2737	BPH2738	1	FALSE	-9.31894	0.0649351	557	2	BPH2737,BPH2738
4	BPH2752--BPH2761	BPH2752	BPH2761	0	TRUE	-43.1603	0.031746	750	2	BPH2752,BPH2761
4	BPH3376--BPH2726	BPH3376	BPH2726	31	FALSE	-26.1251	0.035964	422	3	BPH2726,BPH2727,BPH3376
4	BPH2798--BPH2946	BPH2798	BPH2946	51	FALSE	32.1012	0.034965	456	5	BPH2718,BPH2946,BPH2798,BPH2799,BPH2800
4	BPH2840--BPH2841	BPH2840	BPH2841	0	FALSE	-1.64172	0.484848	548	2	BPH2840,BPH2841
4	BPH2872--BPH2873	BPH2872	BPH2873	0	FALSE	-12.0854	0.536797	646	2	BPH2872,BPH2873
4	BPH2763--BPH2823	BPH2763	BPH2823	161	FALSE	11.6822	0.00865801	657	3	BPH2763,BPH2764,BPH2823
4	BPH2770--BPH2771	BPH2770	BPH2771	2	FALSE	3.1817	0.937229	739	2	BPH2770,BPH2771
4	BPH3284--BPH3272	BPH3284	BPH3272	9	FALSE	-19.8051	0.246753	526	3	BPH3244,BPH3284,BPH3272
4	BPH2778--BPH2777	BPH2778	BPH2777	0	FALSE	7.81792	0.0930736	759	2	BPH2777,BPH2778
4	BPH3459--BPH3462	BPH3459	BPH3462	2	FALSE	-27.469	0.171429	628	2	BPH3459,BPH3462
4	BPH3751--BPH2858	BPH3751	BPH2858	35	FALSE	64.6254	0.0021645	676	5	BPH2720,BPH2742,BPH2858,BPH3750,BPH3751
4	BPH2704--BPH2705	BPH2704	BPH2705	0	FALSE	36.4124	0.0151515	700	2	BPH2704,BPH2705
4	BPH3337--BPH3734	BPH3337	BPH3734	4	FALSE	3.64288	0.818182	532	2	BPH3337,BPH3734
4	BPH3733--BPH3336	BPH3733	BPH3336	2	FALSE	115.831	0.004329	649	2	BPH3336,BPH3733
4	BPH3396--BPH3481	BPH3396	BPH3481	7	FALSE	-13.779	0.0666667	671	2	BPH3396,BPH3481
4	BPH2866--BPH2867	BPH2866	BPH2867	1	FALSE	-22.3157	0.24026	558	2	BPH2866,BPH2867
4	BPH2730--BPH2728	BPH2730	BPH2728	0	FALSE	-6.59919	0.604813	730	3	BPH2728,BPH2729,BPH2730
4	BPH3270--BPH3216	BPH3270	BPH3216	2	FALSE	-9.95811	0.555556	567	2	BPH3216,BPH3270
4	BPH2897--BPH2898	BPH2897	BPH2898	0	FALSE	2.0829	0.937229	772	2	BPH2897,BPH2898
4	BPH3320--BPH3226	BPH3320	BPH3226	38	FALSE	-26.3575	1	519	4	BPH3204,BPH3226,BPH3292,BPH3320
4	BPH3501--BPH3489	BPH3501	BPH3489	3	FALSE	-9.97263	0.125541	690	2	BPH3489,BPH3501
4	BPH3508--BPH3482	BPH3508	BPH3482	8	FALSE	-19.4178	0.114286	600	2	BPH3482,BPH3508
4	BPH3282--BPH3274	BPH3282	BPH3274	3	TRUE	-85.2295	0.015873	648	2	BPH3274,BPH3282
4	BPH3628--BPH3596	BPH3628	BPH3596	21	FALSE	-15.1389	0.329004	581	2	BPH3596,BPH3628
4	BPH2751--BPH2750	BPH2751	BPH2750	1	FALSE	12.9316	0.588745	764	2	BPH2750,BPH2751
4	BPH2987--BPH2988	BPH2987	BPH2988	0	FALSE	-15.2499	0.420635	770	2	BPH2987,BPH2988
4	BPH3696--BPH3632	BPH3696	BPH3632	2	FALSE	-17.3031	0.309524	517	2	BPH3632,BPH3696
4	BPH3638--BPH3670	BPH3638	BPH3670	29	FALSE	15.5445	0.536797	502	3	BPH2869,BPH3670,BPH3638
4	BPH2942--BPH2943	BPH2942	BPH2943	0	FALSE	-3.36698	0.699134	636	2	BPH2942,BPH2943
4	BPH3477--BPH3479	BPH3477	BPH3479	15	FALSE	3.12279	0.792208	736	2	BPH3477,BPH3479
4	BPH3588--BPH3584	BPH3588	BPH3584	9	FALSE	-6.1861	0.484848	705	2	BPH3584,BPH3588
4	BPH3524--BPH3548	BPH3524	BPH3548	1	FALSE	39.9747	0.114286	757	2	BPH3524,BPH3548
4	BPH2953--BPH2952	BPH2953	BPH2952	2	FALSE	-9.27368	0.177489	726	2	BPH2952,BPH2953
4	BPH2962--BPH2963	BPH2962	BPH2963	5	FALSE	0.683086	0.818182	596	3	BPH2962,BPH2963,BPH2964
4	BPH3366--BPH3362	BPH3366	BPH3362	17	TRUE	-60.6017	0.0021645	415	2	BPH3362,BPH3366
4	BPH3568--BPH3590	BPH3568	BPH3590	37	TRUE	-46.2301	0.017316	695	2	BPH3590,BPH3568
4	BPH2852--BPH2857	BPH2852	BPH2857	1	FALSE	9.66952	0.484848	664	2	BPH2852,BPH2857
4	BPH3389--BPH3460	BPH3389	BPH3460	0	FALSE	50.9954	0.428571	560	2	BPH3389,BPH3460
4	BPH2966--BPH2965	BPH2966	BPH2965	0	FALSE	-9.15242	0.24026	531	2	BPH2965,BPH2966
4	BPH2975--BPH2974	BPH2975	BPH2974	0	FALSE	-6.43345	0.428571	768	3	BPH2973,BPH2975,BPH2974
4	BPH2803--BPH2802	BPH2803	BPH2802	29	FALSE	12.719	0.393939	707	3	BPH2801,BPH2802,BPH2803
4	BPH3437--BPH3749	BPH3437	BPH3749	4	FALSE	2.2445	0.699134	693	2	BPH3437,BPH3749
4	BPH2864--BPH2863	BPH2864	BPH2863	0	FALSE	-1.65592	0.937229	755	2	BPH2863,BPH2864
4	BPH2747--BPH2748	BPH2747	BPH2748	1	FALSE	6.33616	0.662338	427	2	BPH2747,BPH2748
4	BPH3738--BPH3381	BPH3738	BPH3381	1	FALSE	6.95866	0.930736	725	2	BPH3381,BPH3738
4	BPH2849--BPH2850	BPH2849	BPH2850	1	FALSE	7.89025	0.662338	645	2	BPH2849,BPH2850
4	BPH3268--BPH3304	BPH3268	BPH3304	2	FALSE	-18.7354	0.792208	662	2	BPH3268,BPH3304
4	BPH2714--BPH2713	BPH2714	BPH2713	2	FALSE	-17.3353	0.177489	716	2	BPH2713,BPH2714
4	BPH3747--BPH3427	BPH3747	BPH3427	2	FALSE	-7.72504	0.309524	692	2	BPH3427,BPH3747
4	BPH2708--BPH2709	BPH2708	BPH2709	0	FALSE	7.26096	0.420635	591	2	BPH2708,BPH2709
4	BPH3352--BPH3736	BPH3352	BPH3736	2	FALSE	13.9241	0.588745	737	2	BPH3352,BPH3736
4	BPH2832--BPH2831	BPH2832	BPH2831	0	FALSE	1.12586	0.792208	545	3	BPH2831,BPH2832,BPH2833
4	BPH2877--BPH2876	BPH2877	BPH2876	4	FALSE	20.6942	0.699134	656	2	BPH2876,BPH2877
4	BPH2888--BPH2887	BPH2888	BPH2887	0	FALSE	-2.50728	0.914286	735	2	BPH2887,BPH2888
4	BPH2824--BPH2825	BPH2824	BPH2825	0	FALSE	-1.84537	0.937229	414	2	BPH2824,BPH2825
4	BPH3260--BPH3306	BPH3260	BPH3306	2	FALSE	29.9898	0.393939	515	2	BPH3260,BPH3306
5	BPH3529--BPH3745	BPH3529	BPH3745	80	FALSE	78.8754	0.0021645	428	15	BPH3401,BPH3493,BPH3742,BPH3417,BPH3743,BPH3744,BPH3745,BPH3463,BPH3741,BPH3433,BPH3748,BPH3523,BPH3527,BPH3529,BPH3739
5	BPH2896--BPH3372	BPH2896	BPH3372	68	FALSE	-45.8357	0.0411255	416	9	BPH2710,BPH2780,BPH2896,BPH3382,BPH3435,BPH2726,BPH2727,BPH3376,BPH3372
5	BPH3636--BPH3670	BPH3636	BPH3670	35	FALSE	26.5519	0.222222	482	23	BPH2787,BPH3704,BPH3702,BPH3666,BPH3636,BPH3692,BPH3668,BPH3710,BPH3706,BPH3757,BPH3658,BPH3672,BPH3648,BPH3650,BPH3652,BPH3694,BPH3755,BPH3640,BPH3688,BPH3662,BPH2869,BPH3670,BPH3638
5	BPH3545--BPH3473	BPH3545	BPH3473	67	FALSE	-9.4373	0.329004	460	16	BPH2779,BPH3394,BPH2907,BPH3328,BPH3485,BPH3511,BPH3356,BPH3737,BPH3547,BPH3360,BPH3535,BPH3752,BPH3346,BPH3443,BPH3545,BPH3473
5	BPH3643--BPH3682	BPH3643	BPH3682	37	FALSE	92.8183	0.0021645	505	6	BPH3643,BPH3700,BPH3674,BPH3753,BPH3682,BPH3686
5	BPH2820--BPH2819	BPH2820	BPH2819	2	FALSE	-15.0066	0.24026	629	2	BPH2819,BPH2820
5	BPH3262--BPH3208	BPH3262	BPH3208	12	FALSE	18.3952	0.329004	511	6	BPH3208,BPH3250,BPH3220,BPH3260,BPH3306,BPH3262
5	BPH2976--BPH2979	BPH2976	BPH2979	1	FALSE	36.3145	0.2	410	5	BPH2977,BPH2979,BPH2978,BPH2976,BPH2980
5	BPH2926--BPH2924	BPH2926	BPH2924	4	FALSE	123.866	0.0021645	584	4	BPH2922,BPH2923,BPH2924,BPH2926
5	BPH2857--BPH2852	BPH2857	BPH2852	1	FALSE	-9.66952	0.484848	664	2	BPH2852,BPH2857
5	BPH3282--BPH3274	BPH3282	BPH3274	3	TRUE	-85.2295	0.015873	648	2	BPH3274,BPH3282
5	BPH2959--BPH2961	BPH2959	BPH2961	0	FALSE	-11.8141	0.588745	643	3	BPH2959,BPH2960,BPH2961
5	BPH3226--BPH3292	BPH3226	BPH3292	5	FALSE	2.89786	0.792208	521	2	BPH3226,BPH3292
5	BPH3596--BPH3628	BPH3596	BPH3628	20	FALSE	15.1389	0.329004	581	2	BPH3596,BPH3628
5	BPH3276--BPH3258	BPH3276	BPH3258	122	FALSE	26.9911	0.536797	523	4	BPH3236,BPH3258,BPH3316,BPH3276
5	BPH3216--BPH3270	BPH3216	BPH3270	2	FALSE	9.95811	0.555556	567	2	BPH3216,BPH3270
5	BPH3749--BPH3437	BPH3749	BPH3437	4	FALSE	-2.2445	0.699134	693	2	BPH3437,BPH3749
5	BPH2799--BPH2798	BPH2799	BPH2798	0	FALSE	-3.08712	0.180653	458	3	BPH2798,BPH2799,BPH2800
5	BPH2858--BPH3750	BPH2858	BPH3750	35	FALSE	48.8298	0.393939	676	5	BPH2720,BPH2742,BPH2858,BPH3750,BPH3751
5	BPH2815--BPH2813	BPH2815	BPH2813	0	FALSE	1.89264	0.792208	576	4	BPH2812,BPH2815,BPH2814,BPH2813
5	BPH2705--BPH2704	BPH2705	BPH2704	0	TRUE	-36.4124	0.0151515	700	2	BPH2704,BPH2705
5	BPH2824--BPH2825	BPH2824	BPH2825	0	FALSE	-1.84537	0.937229	414	2	BPH2824,BPH2825
5	BPH2973--BPH2975	BPH2973	BPH2975	0	FALSE	-26.6955	0.179654	769	2	BPH2973,BPH2975
5	BPH3548--BPH3524	BPH3548	BPH3524	0	FALSE	-39.9747	0.114286	757	2	BPH3524,BPH3548
5	BPH2718--BPH2946	BPH2718	BPH2946	46	FALSE	11.3894	0.588745	457	2	BPH2718,BPH2946
5	BPH2778--BPH2777	BPH2778	BPH2777	0	FALSE	7.81792	0.0930736	759	2	BPH2777,BPH2778
5	BPH3660--BPH3684	BPH3660	BPH3684	46	FALSE	-2.24833	0.818182	510	2	BPH3660,BPH3684
5	BPH2866--BPH2867	BPH2866	BPH2867	1	FALSE	-22.3157	0.24026	558	2	BPH2866,BPH2867
5	BPH3457--BPH3453	BPH3457	BPH3453	4	FALSE	29.1325	0.0822511	450	2	BPH3453,BPH3457
5	BPH2947--BPH2948	BPH2947	BPH2948	0	FALSE	-23.761	0.179654	448	2	BPH2947,BPH2948
5	BPH2755--BPH2754	BPH2755	BPH2754	0	FALSE	2.77606	1	630	2	BPH2754,BPH2755
5	BPH3632--BPH3664	BPH3632	BPH3664	22	FALSE	11.8277	0.699134	516	3	BPH3632,BPH3696,BPH3664
5	BPH3434--BPH3746	BPH3434	BPH3746	0	FALSE	29.3535	0.004329	602	2	BPH3434,BPH3746
5	BPH3337--BPH3734	BPH3337	BPH3734	4	FALSE	3.64288	0.818182	532	2	BPH3337,BPH3734
5	BPH3396--BPH3481	BPH3396	BPH3481	7	FALSE	-13.779	0.0666667	671	2	BPH3396,BPH3481
5	BPH3368--BPH3348	BPH3368	BPH3348	65	TRUE	-56.3119	0.004329	442	3	BPH3348,BPH3735,BPH3368
5	BPH3381--BPH3738	BPH3381	BPH3738	2	FALSE	-6.95866	0.930736	725	2	BPH3381,BPH3738
5	BPH2898--BPH2897	BPH2898	BPH2897	0	FALSE	-2.0829	0.937229	772	2	BPH2897,BPH2898
5	BPH2990--BPH2989	BPH2990	BPH2989	0	FALSE	12.2099	0.0649351	543	3	BPH2989,BPH2990,BPH2991
5	BPH2966--BPH2965	BPH2966	BPH2965	0	FALSE	-9.15242	0.24026	531	2	BPH2965,BPH2966
5	BPH3489--BPH3501	BPH3489	BPH3501	2	FALSE	9.97263	0.125541	690	2	BPH3489,BPH3501
5	BPH2964--BPH2963	BPH2964	BPH2963	5	FALSE	40.5691	0.0021645	597	2	BPH2963,BPH2964
5	BPH2751--BPH2750	BPH2751	BPH2750	1	FALSE	12.9316	0.588745	764	2	BPH2750,BPH2751
5	BPH2747--BPH2748	BPH2747	BPH2748	1	FALSE	6.33616	0.662338	427	2	BPH2747,BPH2748
5	BPH2953--BPH2952	BPH2953	BPH2952	2	FALSE	-9.27368	0.177489	726	2	BPH2952,BPH2953
5	BPH2763--BPH2764	BPH2763	BPH2764	29	FALSE	152.852	0.0011655	658	2	BPH2763,BPH2764
5	BPH2730--BPH2729	BPH2730	BPH2729	5	FALSE	-116.568	4.11353e-05	731	2	BPH2729,BPH2730
5	BPH2831--BPH2832	BPH2831	BPH2832	0	FALSE	-1.12586	0.792208	545	3	BPH2831,BPH2832,BPH2833
5	BPH3499--BPH3413	BPH3499	BPH3413	31	FALSE	68.794	0.0021645	451	3	BPH3403,BPH3413,BPH3499
5	BPH3602--BPH3612	BPH3602	BPH3612	10	FALSE	-7.65837	0.309524	681	2	BPH3612,BPH3602
5	BPH3584--BPH3588	BPH3584	BPH3588	9	FALSE	6.1861	0.484848	705	2	BPH3584,BPH3588
5	BPH2863--BPH2864	BPH2863	BPH2864	0	FALSE	1.65592	0.937229	755	2	BPH2863,BPH2864
5	BPH3482--BPH3508	BPH3482	BPH3508	8	FALSE	19.4178	0.114286	600	2	BPH3482,BPH3508
5	BPH2771--BPH2770	BPH2771	BPH2770	2	FALSE	-3.1817	0.937229	739	2	BPH2770,BPH2771
5	BPH2887--BPH2888	BPH2887	BPH2888	0	FALSE	2.50728	0.914286	735	2	BPH2887,BPH2888
5	BPH3272--BPH3244	BPH3272	BPH3244	5	FALSE	23.1565	0.132035	526	3	BPH3244,BPH3284,BPH3272
5	BPH2849--BPH2850	BPH2849	BPH2850	1	FALSE	7.89025	0.662338	645	2	BPH2849,BPH2850
5	BPH2883--BPH2884	BPH2883	BPH2884	0	FALSE	0.76274	0.84127	634	2	BPH2883,BPH2884
5	BPH3366--BPH3362	BPH3366	BPH3362	17	TRUE	-60.6017	0.0021645	415	2	BPH3362,BPH3366
5	BPH2862--BPH2861	BPH2862	BPH2861	2	FALSE	-23.7964	0.428571	765	2	BPH2861,BPH2862
5	BPH2881--BPH2882	BPH2881	BPH2882	12	FALSE	1.33085	0.914286	615	2	BPH2881,BPH2882
5	BPH2876--BPH2700	BPH2876	BPH2700	150	FALSE	-37.4043	0.179654	655	3	BPH2700,BPH2876,BPH2877
5	BPH2891--BPH2890	BPH2891	BPH2890	0	FALSE	-16.8054	0.150794	659	2	BPH2890,BPH2891
5	BPH2840--BPH2841	BPH2840	BPH2841	0	FALSE	-1.64172	0.484848	548	2	BPH2840,BPH2841
5	BPH3336--BPH3733	BPH3336	BPH3733	2	TRUE	-115.831	0.004329	649	2	BPH3336,BPH3733
5	BPH3294--BPH3246	BPH3294	BPH3246	6	FALSE	-23.2762	0.0411255	580	2	BPH3246,BPH3294
5	BPH2783--BPH2847	BPH2783	BPH2847	33	FALSE	6.23793	0.47619	684	4	BPH2783,BPH2842,BPH2843,BPH2847
5	BPH2713--BPH2714	BPH2713	BPH2714	2	FALSE	17.3353	0.177489	716	2	BPH2713,BPH2714
5	BPH2808--BPH2807	BPH2808	BPH2807	0	FALSE	6.67639	0.407867	688	2	BPH2807,BPH2808
5	BPH3352--BPH3736	BPH3352	BPH3736	2	FALSE	13.9241	0.588745	737	2	BPH3352,BPH3736
5	BPH2737--BPH2738	BPH2737	BPH2738	1	FALSE	-9.31894	0.0649351	557	2	BPH2737,BPH2738
5	BPH2872--BPH2873	BPH2872	BPH2873	0	FALSE	-12.0854	0.536797	646	2	BPH2872,BPH2873
5	BPH2752--BPH2761	BPH2752	BPH2761	0	TRUE	-43.1603	0.031746	750	2	BPH2752,BPH2761
5	BPH2709--BPH2708	BPH2709	BPH2708	1	FALSE	-7.26096	0.420635	591	2	BPH2708,BPH2709
5	BPH3460--BPH3389	BPH3460	BPH3389	1	FALSE	-50.9954	0.428571	560	2	BPH3389,BPH3460
5	BPH2784--BPH2860	BPH2784	BPH2860	134	FALSE	114.455	0.00952381	661	2	BPH2784,BPH2860
5	BPH3340--BPH3338	BPH3340	BPH3338	6	FALSE	145.303	0.0285714	740	3	BPH2792,BPH3340,BPH3338
5	BPH3479--BPH3477	BPH3479	BPH3477	16	FALSE	-3.12279	0.792208	736	2	BPH3477,BPH3479
5	BPH2943--BPH2942	BPH2943	BPH2942	0	FALSE	3.36698	0.699134	636	2	BPH2942,BPH2943
5	BPH2803--BPH2802	BPH2803	BPH2802	29	FALSE	12.719	0.393939	707	3	BPH2801,BPH2802,BPH2803
5	BPH3268--BPH3304	BPH3268	BPH3304	2	FALSE	-18.7354	0.792208	662	2	BPH3268,BPH3304
5	BPH3427--BPH3747	BPH3427	BPH3747	1	FALSE	7.72504	0.309524	692	2	BPH3427,BPH3747
5	BPH3459--BPH3462	BPH3459	BPH3462	2	FALSE	-27.469	0.171429	628	2	BPH3459,BPH3462
5	BPH2987--BPH2988	BPH2987	BPH2988	0	FALSE	-15.2499	0.420635	770	2	BPH2987,BPH2988
5	BPH3568--BPH3590	BPH3568	BPH3590	37	TRUE	-46.2301	0.017316	695	2	BPH3590,BPH3568
6	BPH3527--BPH3744	BPH3527	BPH3744	34	FALSE	50.0306	0.00865801	428	15	BPH3401,BPH3493,BPH3742,BPH3417,BPH3743,BPH3744,BPH3745,BPH3463,BPH3741,BPH3433,BPH3748,BPH3523,BPH3527,BPH3529,BPH3739
6	BPH2710--BPH3382	BPH2710	BPH3382	29	FALSE	66.4939	0.0021645	418	4	BPH2710,BPH2780,BPH2896,BPH3382
6	BPH3638--BPH3755	BPH3638	BPH3755	20	FALSE	-17.4231	0.914286	482	23	BPH2787,BPH3704,BPH3702,BPH3666,BPH3636,BPH3692,BPH3668,BPH3710,BPH3706,BPH3757,BPH3658,BPH3672,BPH3648,BPH3650,BPH3652,BPH3694,BPH3755,BPH3640,BPH3688,BPH3662,BPH2869,BPH3670,BPH3638
6	BPH3535--BPH3360	BPH3535	BPH3360	87	FALSE	-2.09426	0.699134	471	3	BPH3360,BPH3535,BPH3752
6	BPH2824--BPH2825	BPH2824	BPH2825	0	FALSE	-1.84537	0.937229	414	2	BPH2824,BPH2825
6	BPH2798--BPH2946	BPH2798	BPH2946	51	FALSE	32.1012	0.034965	456	5	BPH2718,BPH2946,BPH2798,BPH2799,BPH2800
6	BPH2922--BPH2923	BPH2922	BPH2923	2	FALSE	-13.6876	0.125541	586	2	BPH2922,BPH2923
6	BPH3664--BPH3696	BPH3664	BPH3696	24	FALSE	5.47538	0.937229	516	3	BPH3632,BPH3696,BPH3664
6	BPH3499--BPH3413	BPH3499	BPH3413	31	FALSE	68.794	0.0021645	451	3	BPH3403,BPH3413,BPH3499
6	BPH2981--BPH2980	BPH2981	BPH2980	13	FALSE	-46.9799	0.1	409	6	BPH2981,BPH2977,BPH2979,BPH2978,BPH2976,BPH2980
6	BPH3381--BPH3738	BPH3381	BPH3738	2	FALSE	-6.95866	0.930736	725	2	BPH3381,BPH3738
6	BPH3547--BPH3356	BPH3547	BPH3356	65	FALSE	-68.7166	0.004329	462	9	BPH2779,BPH3394,BPH2907,BPH3328,BPH3485,BPH3511,BPH3356,BPH3737,BPH3547
6	BPH3682--BPH3753	BPH3682	BPH3753	46	FALSE	-63.9917	0.00865801	505	6	BPH3643,BPH3700,BPH3674,BPH3753,BPH3682,BPH3686
6	BPH3590--BPH3568	BPH3590	BPH3568	37	FALSE	46.2301	0.017316	695	2	BPH3590,BPH3568
6	BPH2738--BPH2737	BPH2738	BPH2737	1	FALSE	9.31894	0.0649351	557	2	BPH2737,BPH2738
6	BPH2966--BPH2965	BPH2966	BPH2965	0	FALSE	-9.15242	0.24026	531	2	BPH2965,BPH2966
6	BPH2898--BPH2897	BPH2898	BPH2897	0	FALSE	-2.0829	0.937229	772	2	BPH2897,BPH2898
6	BPH3208--BPH3306	BPH3208	BPH3306	3	FALSE	46.7183	1	512	5	BPH3208,BPH3250,BPH3220,BPH3260,BPH3306
6	BPH2754--BPH2755	BPH2754	BPH2755	0	FALSE	-2.77606	1	630	2	BPH2754,BPH2755
6	BPH3304--BPH3268	BPH3304	BPH3268	2	FALSE	18.7354	0.792208	662	2	BPH3268,BPH3304
6	BPH3735--BPH3368	BPH3735	BPH3368	59	FALSE	50.4856	0.0021645	442	3	BPH3348,BPH3735,BPH3368
6	BPH2814--BPH2813	BPH2814	BPH2813	0	FALSE	-4.26774	0.662338	576	4	BPH2812,BPH2815,BPH2814,BPH2813
6	BPH2876--BPH2700	BPH2876	BPH2700	150	FALSE	-37.4043	0.179654	655	3	BPH2700,BPH2876,BPH2877
6	BPH2807--BPH2808	BPH2807	BPH2808	0	FALSE	-6.67639	0.407867	688	2	BPH2807,BPH2808
6	BPH3258--BPH3316	BPH3258	BPH3316	94	FALSE	-36.7196	0.393939	524	3	BPH3236,BPH3258,BPH3316
6	BPH3746--BPH3423	BPH3746	BPH3423	0	FALSE	12.572	0.257143	601	3	BPH3423,BPH3434,BPH3746
6	BPH3226--BPH3292	BPH3226	BPH3292	5	FALSE	2.89786	0.792208	521	2	BPH3226,BPH3292
6	BPH3439--BPH3457	BPH3439	BPH3457	15	FALSE	3.59932	0.662338	449	3	BPH3439,BPH3453,BPH3457
6	BPH2866--BPH2867	BPH2866	BPH2867	1	FALSE	-22.3157	0.24026	558	2	BPH2866,BPH2867
6	BPH2887--BPH2888	BPH2887	BPH2888	0	FALSE	2.50728	0.914286	735	2	BPH2887,BPH2888
6	BPH2943--BPH2942	BPH2943	BPH2942	0	FALSE	3.36698	0.699134	636	2	BPH2942,BPH2943
6	BPH2952--BPH2953	BPH2952	BPH2953	2	FALSE	9.27368	0.177489	726	2	BPH2952,BPH2953
6	BPH2948--BPH2947	BPH2948	BPH2947	0	FALSE	23.761	0.179654	448	2	BPH2947,BPH2948
6	BPH2989--BPH2991	BPH2989	BPH2991	0	FALSE	-10.4447	0.179654	543	3	BPH2989,BPH2990,BPH2991
6	BPH2761--BPH2752	BPH2761	BPH2752	0	FALSE	43.1603	0.031746	750	2	BPH2752,BPH2761
6	BPH2988--BPH2987	BPH2988	BPH2987	0	FALSE	15.2499	0.420635	770	2	BPH2987,BPH2988
6	BPH2802--BPH2803	BPH2802	BPH2803	30	FALSE	-12.719	0.393939	707	3	BPH2801,BPH2802,BPH2803
6	BPH3548--BPH3524	BPH3548	BPH3524	0	FALSE	-39.9747	0.114286	757	2	BPH3524,BPH3548
6	BPH3338--BPH3340	BPH3338	BPH3340	7	FALSE	-145.303	0.0285714	740	3	BPH2792,BPH3340,BPH3338
6	BPH3216--BPH3270	BPH3216	BPH3270	2	FALSE	9.95811	0.555556	567	2	BPH3216,BPH3270
6	BPH2891--BPH2890	BPH2891	BPH2890	0	FALSE	-16.8054	0.150794	659	2	BPH2890,BPH2891
6	BPH3460--BPH3389	BPH3460	BPH3389	1	FALSE	-50.9954	0.428571	560	2	BPH3389,BPH3460
6	BPH2840--BPH2841	BPH2840	BPH2841	0	FALSE	-1.64172	0.484848	548	2	BPH2840,BPH2841
6	BPH3508--BPH3482	BPH3508	BPH3482	8	FALSE	-19.4178	0.114286	600	2	BPH3482,BPH3508
6	BPH2961--BPH2959	BPH2961	BPH2959	0	FALSE	11.8141	0.588745	643	3	BPH2959,BPH2960,BPH2961
6	BPH2763--BPH2823	BPH2763	BPH2823	161	FALSE	11.6822	0.00865801	657	3	BPH2763,BPH2764,BPH2823
6	BPH2771--BPH2770	BPH2771	BPH2770	2	FALSE	-3.1817	0.937229	739	2	BPH2770,BPH2771
6	BPH3660--BPH3684	BPH3660	BPH3684	46	FALSE	-2.24833	0.818182	510	2	BPH3660,BPH3684
6	BPH3750--BPH2858	BPH3750	BPH2858	34	FALSE	-48.8298	0.393939	676	5	BPH2720,BPH2742,BPH2858,BPH3750,BPH3751
6	BPH2784--BPH2860	BPH2784	BPH2860	134	FALSE	114.455	0.00952381	661	2	BPH2784,BPH2860
6	BPH2857--BPH2852	BPH2857	BPH2852	1	FALSE	-9.66952	0.484848	664	2	BPH2852,BPH2857
6	BPH3749--BPH3437	BPH3749	BPH3437	4	FALSE	-2.2445	0.699134	693	2	BPH3437,BPH3749
6	BPH2727--BPH3372	BPH2727	BPH3372	66	FALSE	-25.9526	0.002664	421	4	BPH2726,BPH2727,BPH3376,BPH3372
6	BPH2884--BPH2883	BPH2884	BPH2883	0	FALSE	-0.76274	0.84127	634	2	BPH2883,BPH2884
6	BPH3336--BPH3733	BPH3336	BPH3733	2	TRUE	-115.831	0.004329	649	2	BPH3336,BPH3733
6	BPH2975--BPH2974	BPH2975	BPH2974	0	FALSE	-6.43345	0.428571	768	3	BPH2973,BPH2975,BPH2974
6	BPH2872--BPH2873	BPH2872	BPH2873	0	FALSE	-12.0854	0.536797	646	2	BPH2872,BPH2873
6	BPH3346--BPH3545	BPH3346	BPH3545	61	FALSE	-36.4419	0.0411255	473	3	BPH3346,BPH3443,BPH3545
6	BPH3584--BPH3588	BPH3584	BPH3588	9	FALSE	6.1861	0.484848	705	2	BPH3584,BPH3588
6	BPH2819--BPH2820	BPH2819	BPH2820	2	FALSE	15.0066	0.24026	629	2	BPH2819,BPH2820
6	BPH2863--BPH2864	BPH2863	BPH2864	0	FALSE	1.65592	0.937229	755	2	BPH2863,BPH2864
6	BPH2850--BPH2849	BPH2850	BPH2849	1	FALSE	-7.89025	0.662338	645	2	BPH2849,BPH2850
6	BPH2704--BPH2705	BPH2704	BPH2705	0	FALSE	36.4124	0.0151515	700	2	BPH2704,BPH2705
6	BPH3628--BPH3596	BPH3628	BPH3596	21	FALSE	-15.1389	0.329004	581	2	BPH3596,BPH3628
6	BPH2728--BPH2730	BPH2728	BPH2730	0	FALSE	6.59919	0.604813	730	3	BPH2728,BPH2729,BPH2730
6	BPH3244--BPH3284	BPH3244	BPH3284	5	FALSE	-3.35133	0.792208	527	2	BPH3244,BPH3284
6	BPH3734--BPH3337	BPH3734	BPH3337	3	FALSE	-3.64288	0.818182	532	2	BPH3337,BPH3734
6	BPH2831--BPH2832	BPH2831	BPH2832	0	FALSE	-1.12586	0.792208	545	3	BPH2831,BPH2832,BPH2833
6	BPH2783--BPH2847	BPH2783	BPH2847	33	FALSE	6.23793	0.47619	684	4	BPH2783,BPH2842,BPH2843,BPH2847
6	BPH3479--BPH3477	BPH3479	BPH3477	16	FALSE	-3.12279	0.792208	736	2	BPH3477,BPH3479
6	BPH3462--BPH3459	BPH3462	BPH3459	1	FALSE	27.469	0.171429	628	2	BPH3459,BPH3462
6	BPH2748--BPH2747	BPH2748	BPH2747	2	FALSE	-6.33616	0.662338	427	2	BPH2747,BPH2748
6	BPH3274--BPH3282	BPH3274	BPH3282	1	FALSE	85.2295	0.015873	648	2	BPH3274,BPH3282
6	BPH2708--BPH2709	BPH2708	BPH2709	0	FALSE	7.26096	0.420635	591	2	BPH2708,BPH2709
6	BPH2963--BPH2962	BPH2963	BPH2962	5	FALSE	-0.683086	0.818182	596	3	BPH2962,BPH2963,BPH2964
6	BPH3352--BPH3736	BPH3352	BPH3736	2	FALSE	13.9241	0.588745	737	2	BPH3352,BPH3736
6	BPH2881--BPH2882	BPH2881	BPH2882	12	FALSE	1.33085	0.914286	615	2	BPH2881,BPH2882
6	BPH3246--BPH3294	BPH3246	BPH3294	8	FALSE	23.2762	0.0411255	580	2	BPH3246,BPH3294
6	BPH3602--BPH3612	BPH3602	BPH3612	10	FALSE	-7.65837	0.309524	681	2	BPH3612,BPH3602
6	BPH3501--BPH3489	BPH3501	BPH3489	3	FALSE	-9.97263	0.125541	690	2	BPH3489,BPH3501
6	BPH3396--BPH3481	BPH3396	BPH3481	7	FALSE	-13.779	0.0666667	671	2	BPH3396,BPH3481
6	BPH2713--BPH2714	BPH2713	BPH2714	2	FALSE	17.3353	0.177489	716	2	BPH2713,BPH2714
6	BPH3747--BPH3427	BPH3747	BPH3427	2	FALSE	-7.72504	0.309524	692	2	BPH3427,BPH3747
6	BPH2750--BPH2751	BPH2750	BPH2751	2	FALSE	-12.9316	0.588745	764	2	BPH2750,BPH2751
6	BPH2777--BPH2778	BPH2777	BPH2778	0	FALSE	-7.81792	0.0930736	759	2	BPH2777,BPH2778
6	BPH2862--BPH2861	BPH2862	BPH2861	2	FALSE	-23.7964	0.428571	765	2	BPH2861,BPH2862
6	BPH3366--BPH3362	BPH3366	BPH3362	17	TRUE	-60.6017	0.0021645	415	2	BPH3362,BPH3366
7	BPH3670--BPH3688	BPH3670	BPH3688	32	FALSE	-93.8548	0.004329	482	23	BPH2787,BPH3704,BPH3702,BPH3666,BPH3636,BPH3692,BPH3668,BPH3710,BPH3706,BPH3757,BPH3658,BPH3672,BPH3648,BPH3650,BPH3652,BPH3694,BPH3755,BPH3640,BPH3688,BPH3662,BPH2869,BPH3670,BPH3638
7	BPH3262--BPH3250	BPH3262	BPH3250	9	FALSE	42.4449	0.0952381	511	6	BPH3208,BPH3250,BPH3220,BPH3260,BPH3306,BPH3262
7	BPH3435--BPH2781	BPH3435	BPH2781	63	FALSE	32.0696	0.0151515	404	21	BPH2710,BPH2780,BPH2896,BPH3382,BPH3435,BPH2726,BPH2727,BPH3376,BPH3372,BPH3362,BPH3366,BPH2824,BPH2825,BPH2781,BPH2982,BPH2981,BPH2977,BPH2979,BPH2978,BPH2976,BPH2980
7	BPH3737--BPH3356	BPH3737	BPH3356	0	FALSE	-44.7685	0.588745	469	2	BPH3356,BPH3737
7	BPH2922--BPH2924	BPH2922	BPH2924	3	FALSE	104.127	0.004329	585	3	BPH2922,BPH2923,BPH2924
7	BPH3401--BPH3527	BPH3401	BPH3527	33	FALSE	-27.1872	0.0411255	428	15	BPH3401,BPH3493,BPH3742,BPH3417,BPH3743,BPH3744,BPH3745,BPH3463,BPH3741,BPH3433,BPH3748,BPH3523,BPH3527,BPH3529,BPH3739
7	BPH3535--BPH3360	BPH3535	BPH3360	87	FALSE	-2.09426	0.699134	471	3	BPH3360,BPH3535,BPH3752
7	BPH2832--BPH2831	BPH2832	BPH2831	0	FALSE	1.12586	0.792208	545	3	BPH2831,BPH2832,BPH2833
7	BPH2860--BPH2784	BPH2860	BPH2784	147	TRUE	-114.455	0.00952381	661	2	BPH2784,BPH2860
7	BPH2960--BPH2959	BPH2960	BPH2959	0	FALSE	12.3847	0.662338	643	3	BPH2959,BPH2960,BPH2961
7	BPH3226--BPH3320	BPH3226	BPH3320	36	FALSE	26.3575	1	519	4	BPH3204,BPH3226,BPH3292,BPH3320
7	BPH2729--BPH2730	BPH2729	BPH2730	6	FALSE	116.568	4.11353e-05	731	2	BPH2729,BPH2730
7	BPH2720--BPH2858	BPH2720	BPH2858	39	FALSE	79.6552	0.0021645	677	3	BPH2720,BPH2742,BPH2858
7	BPH2975--BPH2974	BPH2975	BPH2974	0	FALSE	-6.43345	0.428571	768	3	BPH2973,BPH2975,BPH2974
7	BPH3389--BPH3460	BPH3389	BPH3460	0	FALSE	50.9954	0.428571	560	2	BPH3389,BPH3460
7	BPH3485--BPH3511	BPH3485	BPH3511	12	FALSE	25.3332	0.150794	468	2	BPH3485,BPH3511
7	BPH3481--BPH3396	BPH3481	BPH3396	7	FALSE	13.779	0.0666667	671	2	BPH3396,BPH3481
7	BPH2770--BPH2771	BPH2770	BPH2771	2	FALSE	3.1817	0.937229	739	2	BPH2770,BPH2771
7	BPH2755--BPH2754	BPH2755	BPH2754	0	FALSE	2.77606	1	630	2	BPH2754,BPH2755
7	BPH3457--BPH3453	BPH3457	BPH3453	4	FALSE	29.1325	0.0822511	450	2	BPH3453,BPH3457
7	BPH3632--BPH3696	BPH3632	BPH3696	1	FALSE	17.3031	0.309524	517	2	BPH3632,BPH3696
7	BPH3660--BPH3700	BPH3660	BPH3700	40	FALSE	60.7907	0.00865801	504	8	BPH3643,BPH3700,BPH3674,BPH3753,BPH3682,BPH3686,BPH3660,BPH3684
7	BPH2803--BPH2802	BPH2803	BPH2802	29	FALSE	12.719	0.393939	707	3	BPH2801,BPH2802,BPH2803
7	BPH3489--BPH3501	BPH3489	BPH3501	2	FALSE	9.97263	0.125541	690	2	BPH3489,BPH3501
7	BPH3216--BPH3270	BPH3216	BPH3270	2	FALSE	9.95811	0.555556	567	2	BPH3216,BPH3270
7	BPH2814--BPH2813	BPH2814	BPH2813	0	FALSE	-4.26774	0.662338	576	4	BPH2812,BPH2815,BPH2814,BPH2813
7	BPH3413--BPH3499	BPH3413	BPH3499	32	FALSE	-68.794	0.0021645	451	3	BPH3403,BPH3413,BPH3499
7	BPH3734--BPH3337	BPH3734	BPH3337	3	FALSE	-3.64288	0.818182	532	2	BPH3337,BPH3734
7	BPH3735--BPH3348	BPH3735	BPH3348	0	FALSE	-5.82626	0.177489	443	2	BPH3348,BPH3735
7	BPH2850--BPH2849	BPH2850	BPH2849	1	FALSE	-7.89025	0.662338	645	2	BPH2849,BPH2850
7	BPH3459--BPH3462	BPH3459	BPH3462	2	FALSE	-27.469	0.171429	628	2	BPH3459,BPH3462
7	BPH3246--BPH3294	BPH3246	BPH3294	8	FALSE	23.2762	0.0411255	580	2	BPH3246,BPH3294
7	BPH2799--BPH2798	BPH2799	BPH2798	0	FALSE	-3.08712	0.180653	458	3	BPH2798,BPH2799,BPH2800
7	BPH2751--BPH2750	BPH2751	BPH2750	1	FALSE	12.9316	0.588745	764	2	BPH2750,BPH2751
7	BPH2779--BPH3394	BPH2779	BPH3394	38	FALSE	1.75762	0.662338	465	2	BPH2779,BPH3394
7	BPH3482--BPH3508	BPH3482	BPH3508	8	FALSE	19.4178	0.114286	600	2	BPH3482,BPH3508
7	BPH2943--BPH2942	BPH2943	BPH2942	0	FALSE	3.36698	0.699134	636	2	BPH2942,BPH2943
7	BPH3434--BPH3746	BPH3434	BPH3746	0	FALSE	29.3535	0.004329	602	2	BPH3434,BPH3746
7	BPH3352--BPH3736	BPH3352	BPH3736	2	FALSE	13.9241	0.588745	737	2	BPH3352,BPH3736
7	BPH2991--BPH2989	BPH2991	BPH2989	0	FALSE	10.4447	0.179654	543	3	BPH2989,BPH2990,BPH2991
7	BPH3236--BPH3258	BPH3236	BPH3258	0	FALSE	-9.1088	1	525	2	BPH3236,BPH3258
7	BPH3304--BPH3268	BPH3304	BPH3268	2	FALSE	18.7354	0.792208	662	2	BPH3268,BPH3304
7	BPH3568--BPH3590	BPH3568	BPH3590	37	TRUE	-46.2301	0.017316	695	2	BPH3590,BPH3568
7	BPH3284--BPH3244	BPH3284	BPH3244	5	FALSE	3.35133	0.792208	527	2	BPH3244,BPH3284
7	BPH2807--BPH2808	BPH2807	BPH2808	0	FALSE	-6.67639	0.407867	688	2	BPH2807,BPH2808
7	BPH2705--BPH2704	BPH2705	BPH2704	0	TRUE	-36.4124	0.0151515	700	2	BPH2704,BPH2705
7	BPH2857--BPH2852	BPH2857	BPH2852	1	FALSE	-9.66952	0.484848	664	2	BPH2852,BPH2857
7	BPH3477--BPH3479	BPH3477	BPH3479	15	FALSE	3.12279	0.792208	736	2	BPH3477,BPH3479
7	BPH3628--BPH3596	BPH3628	BPH3596	21	FALSE	-15.1389	0.329004	581	2	BPH3596,BPH3628
7	BPH3545--BPH3346	BPH3545	BPH3346	58	FALSE	36.4419	0.0411255	473	3	BPH3346,BPH3443,BPH3545
7	BPH2946--BPH2718	BPH2946	BPH2718	46	FALSE	-11.3894	0.588745	457	2	BPH2718,BPH2946
7	BPH2843--BPH2842	BPH2843	BPH2842	0	FALSE	-7.19808	0.24026	686	2	BPH2842,BPH2843
7	BPH2876--BPH2877	BPH2876	BPH2877	4	FALSE	-20.6942	0.699134	656	2	BPH2876,BPH2877
7	BPH2953--BPH2952	BPH2953	BPH2952	2	FALSE	-9.27368	0.177489	726	2	BPH2952,BPH2953
7	BPH2708--BPH2709	BPH2708	BPH2709	0	FALSE	7.26096	0.420635	591	2	BPH2708,BPH2709
7	BPH3588--BPH3584	BPH3588	BPH3584	9	FALSE	-6.1861	0.484848	705	2	BPH3584,BPH3588
7	BPH2964--BPH2963	BPH2964	BPH2963	5	FALSE	40.5691	0.0021645	597	2	BPH2963,BPH2964
7	BPH2841--BPH2840	BPH2841	BPH2840	0	FALSE	1.64172	0.484848	548	2	BPH2840,BPH2841
7	BPH2881--BPH2882	BPH2881	BPH2882	12	FALSE	1.33085	0.914286	615	2	BPH2881,BPH2882
7	BPH2987--BPH2988	BPH2987	BPH2988	0	FALSE	-15.2499	0.420635	770	2	BPH2987,BPH2988
7	BPH3274--BPH3282	BPH3274	BPH3282	1	FALSE	85.2295	0.015873	648	2	BPH3274,BPH3282
7	BPH2752--BPH2761	BPH2752	BPH2761	0	TRUE	-43.1603	0.031746	750	2	BPH2752,BPH2761
7	BPH2820--BPH2819	BPH2820	BPH2819	2	FALSE	-15.0066	0.24026	629	2	BPH2819,BPH2820
7	BPH3749--BPH3437	BPH3749	BPH3437	4	FALSE	-2.2445	0.699134	693	2	BPH3437,BPH3749
7	BPH3338--BPH3340	BPH3338	BPH3340	7	FALSE	-145.303	0.0285714	740	3	BPH2792,BPH3340,BPH3338
7	BPH2897--BPH2898	BPH2897	BPH2898	0	FALSE	2.0829	0.937229	772	2	BPH2897,BPH2898
7	BPH2891--BPH2890	BPH2891	BPH2890	0	FALSE	-16.8054	0.150794	659	2	BPH2890,BPH2891
7	BPH2884--BPH2883	BPH2884	BPH2883	0	FALSE	-0.76274	0.84127	634	2	BPH2883,BPH2884
7	BPH3602--BPH3612	BPH3602	BPH3612	10	FALSE	-7.65837	0.309524	681	2	BPH3612,BPH3602
7	BPH3336--BPH3733	BPH3336	BPH3733	2	TRUE	-115.831	0.004329	649	2	BPH3336,BPH3733
7	BPH3548--BPH3524	BPH3548	BPH3524	0	FALSE	-39.9747	0.114286	757	2	BPH3524,BPH3548
7	BPH2965--BPH2966	BPH2965	BPH2966	0	FALSE	9.15242	0.24026	531	2	BPH2965,BPH2966
7	BPH2713--BPH2714	BPH2713	BPH2714	2	FALSE	17.3353	0.177489	716	2	BPH2713,BPH2714
7	BPH2748--BPH2747	BPH2748	BPH2747	2	FALSE	-6.33616	0.662338	427	2	BPH2747,BPH2748
7	BPH3381--BPH3738	BPH3381	BPH3738	2	FALSE	-6.95866	0.930736	725	2	BPH3381,BPH3738
7	BPH2947--BPH2948	BPH2947	BPH2948	0	FALSE	-23.761	0.179654	448	2	BPH2947,BPH2948
7	BPH3747--BPH3427	BPH3747	BPH3427	2	FALSE	-7.72504	0.309524	692	2	BPH3427,BPH3747
7	BPH2763--BPH2823	BPH2763	BPH2823	161	FALSE	11.6822	0.00865801	657	3	BPH2763,BPH2764,BPH2823
7	BPH2777--BPH2778	BPH2777	BPH2778	0	FALSE	-7.81792	0.0930736	759	2	BPH2777,BPH2778
7	BPH3751--BPH3750	BPH3751	BPH3750	1	FALSE	113.455	0.00865801	679	2	BPH3750,BPH3751
7	BPH2887--BPH2888	BPH2887	BPH2888	0	FALSE	2.50728	0.914286	735	2	BPH2887,BPH2888
7	BPH2861--BPH2862	BPH2861	BPH2862	1	FALSE	23.7964	0.428571	765	2	BPH2861,BPH2862
7	BPH2863--BPH2864	BPH2863	BPH2864	0	FALSE	1.65592	0.937229	755	2	BPH2863,BPH2864
7	BPH2867--BPH2866	BPH2867	BPH2866	2	FALSE	22.3157	0.24026	558	2	BPH2866,BPH2867
7	BPH2737--BPH2738	BPH2737	BPH2738	1	FALSE	-9.31894	0.0649351	557	2	BPH2737,BPH2738
7	BPH2872--BPH2873	BPH2872	BPH2873	0	FALSE	-12.0854	0.536797	646	2	BPH2872,BPH2873
8	BPH3745--BPH3529	BPH3745	BPH3529	80	FALSE	-78.8754	0.0021645	428	15	BPH3401,BPH3493,BPH3742,BPH3417,BPH3743,BPH3744,BPH3745,BPH3463,BPH3741,BPH3433,BPH3748,BPH3523,BPH3527,BPH3529,BPH3739
8	BPH3670--BPH3757	BPH3670	BPH3757	35	FALSE	-107.315	0.004329	482	23	BPH2787,BPH3704,BPH3702,BPH3666,BPH3636,BPH3692,BPH3668,BPH3710,BPH3706,BPH3757,BPH3658,BPH3672,BPH3648,BPH3650,BPH3652,BPH3694,BPH3755,BPH3640,BPH3688,BPH3662,BPH2869,BPH3670,BPH3638
8	BPH3372--BPH2726	BPH3372	BPH2726	75	FALSE	12.9644	0.0047952	421	4	BPH2726,BPH2727,BPH3376,BPH3372
8	BPH2713--BPH2714	BPH2713	BPH2714	2	FALSE	17.3353	0.177489	716	2	BPH2713,BPH2714
8	BPH3596--BPH3628	BPH3596	BPH3628	20	FALSE	15.1389	0.329004	581	2	BPH3596,BPH3628
8	BPH2802--BPH2803	BPH2802	BPH2803	30	FALSE	-12.719	0.393939	707	3	BPH2801,BPH2802,BPH2803
8	BPH3674--BPH3660	BPH3674	BPH3660	45	FALSE	-20.3005	0.125541	504	8	BPH3643,BPH3700,BPH3674,BPH3753,BPH3682,BPH3686,BPH3660,BPH3684
8	BPH3733--BPH3336	BPH3733	BPH3336	2	FALSE	115.831	0.004329	649	2	BPH3336,BPH3733
8	BPH3356--BPH3547	BPH3356	BPH3547	64	FALSE	68.7166	0.004329	462	9	BPH2779,BPH3394,BPH2907,BPH3328,BPH3485,BPH3511,BPH3356,BPH3737,BPH3547
8	BPH2974--BPH2973	BPH2974	BPH2973	0	FALSE	33.1289	0.0519481	768	3	BPH2973,BPH2975,BPH2974
8	BPH3439--BPH3403	BPH3439	BPH3403	22	FALSE	55.4589	0.004329	444	10	BPH2947,BPH2948,BPH3439,BPH3453,BPH3457,BPH3431,BPH3469,BPH3403,BPH3413,BPH3499
8	BPH2783--BPH2847	BPH2783	BPH2847	33	FALSE	6.23793	0.47619	684	4	BPH2783,BPH2842,BPH2843,BPH2847
8	BPH2780--BPH2710	BPH2780	BPH2710	47	FALSE	-31.6049	0.00865801	419	3	BPH2710,BPH2780,BPH2896
8	BPH2982--BPH2977	BPH2982	BPH2977	16	FALSE	21.4313	0.2	408	7	BPH2982,BPH2981,BPH2977,BPH2979,BPH2978,BPH2976,BPH2980
8	BPH2798--BPH2799	BPH2798	BPH2799	0	FALSE	3.08712	0.180653	458	3	BPH2798,BPH2799,BPH2800
8	BPH3294--BPH3246	BPH3294	BPH3246	6	FALSE	-23.2762	0.0411255	580	2	BPH3246,BPH3294
8	BPH3208--BPH3262	BPH3208	BPH3262	9	FALSE	-18.3952	0.329004	511	6	BPH3208,BPH3250,BPH3220,BPH3260,BPH3306,BPH3262
8	BPH2925--BPH2923	BPH2925	BPH2923	3	FALSE	-100.514	0.0021645	583	5	BPH2922,BPH2923,BPH2924,BPH2926,BPH2925
8	BPH2963--BPH2964	BPH2963	BPH2964	5	TRUE	-40.5691	0.0021645	597	2	BPH2963,BPH2964
8	BPH3340--BPH3338	BPH3340	BPH3338	6	FALSE	145.303	0.0285714	740	3	BPH2792,BPH3340,BPH3338
8	BPH3226--BPH3320	BPH3226	BPH3320	36	FALSE	26.3575	1	519	4	BPH3204,BPH3226,BPH3292,BPH3320
8	BPH3346--BPH3545	BPH3346	BPH3545	61	FALSE	-36.4419	0.0411255	473	3	BPH3346,BPH3443,BPH3545
8	BPH2815--BPH2812	BPH2815	BPH2812	0	FALSE	2.00875	0.937229	578	2	BPH2812,BPH2815
8	BPH3236--BPH3276	BPH3236	BPH3276	118	FALSE	-36.0999	0.428571	523	4	BPH3236,BPH3258,BPH3316,BPH3276
8	BPH3735--BPH3348	BPH3735	BPH3348	0	FALSE	-5.82626	0.177489	443	2	BPH3348,BPH3735
8	BPH2860--BPH2784	BPH2860	BPH2784	147	TRUE	-114.455	0.00952381	661	2	BPH2784,BPH2860
8	BPH2883--BPH2884	BPH2883	BPH2884	0	FALSE	0.76274	0.84127	634	2	BPH2883,BPH2884
8	BPH2946--BPH2718	BPH2946	BPH2718	46	FALSE	-11.3894	0.588745	457	2	BPH2718,BPH2946
8	BPH2755--BPH2754	BPH2755	BPH2754	0	FALSE	2.77606	1	630	2	BPH2754,BPH2755
8	BPH3434--BPH3423	BPH3434	BPH3423	0	FALSE	41.9255	0.015873	601	3	BPH3423,BPH3434,BPH3746
8	BPH3632--BPH3664	BPH3632	BPH3664	22	FALSE	11.8277	0.699134	516	3	BPH3632,BPH3696,BPH3664
8	BPH2881--BPH2882	BPH2881	BPH2882	12	FALSE	1.33085	0.914286	615	2	BPH2881,BPH2882
8	BPH3270--BPH3216	BPH3270	BPH3216	2	FALSE	-9.95811	0.555556	567	2	BPH3216,BPH3270
8	BPH2748--BPH2747	BPH2748	BPH2747	2	FALSE	-6.33616	0.662338	427	2	BPH2747,BPH2748
8	BPH3751--BPH3750	BPH3751	BPH3750	1	FALSE	113.455	0.00865801	679	2	BPH3750,BPH3751
8	BPH2857--BPH2852	BPH2857	BPH2852	1	FALSE	-9.66952	0.484848	664	2	BPH2852,BPH2857
8	BPH2778--BPH2777	BPH2778	BPH2777	0	FALSE	7.81792	0.0930736	759	2	BPH2777,BPH2778
8	BPH3584--BPH3588	BPH3584	BPH3588	9	FALSE	6.1861	0.484848	705	2	BPH3584,BPH3588
8	BPH2989--BPH2991	BPH2989	BPH2991	0	FALSE	-10.4447	0.179654	543	3	BPH2989,BPH2990,BPH2991
8	BPH3734--BPH3337	BPH3734	BPH3337	3	FALSE	-3.64288	0.818182	532	2	BPH3337,BPH3734
8	BPH2961--BPH2959	BPH2961	BPH2959	0	FALSE	11.8141	0.588745	643	3	BPH2959,BPH2960,BPH2961
8	BPH3590--BPH3568	BPH3590	BPH3568	37	FALSE	46.2301	0.017316	695	2	BPH3590,BPH3568
8	BPH3749--BPH3437	BPH3749	BPH3437	4	FALSE	-2.2445	0.699134	693	2	BPH3437,BPH3749
8	BPH3752--BPH3535	BPH3752	BPH3535	2	FALSE	-13.9253	0.132035	472	2	BPH3535,BPH3752
8	BPH3462--BPH3459	BPH3462	BPH3459	1	FALSE	27.469	0.171429	628	2	BPH3459,BPH3462
8	BPH2729--BPH2728	BPH2729	BPH2728	6	FALSE	109.969	4.11353e-05	730	3	BPH2728,BPH2729,BPH2730
8	BPH2841--BPH2840	BPH2841	BPH2840	0	FALSE	1.64172	0.484848	548	2	BPH2840,BPH2841
8	BPH3427--BPH3747	BPH3427	BPH3747	1	FALSE	7.72504	0.309524	692	2	BPH3427,BPH3747
8	BPH2763--BPH2823	BPH2763	BPH2823	161	FALSE	11.6822	0.00865801	657	3	BPH2763,BPH2764,BPH2823
8	BPH3612--BPH3602	BPH3612	BPH3602	11	FALSE	7.65837	0.309524	681	2	BPH3612,BPH3602
8	BPH3362--BPH3366	BPH3362	BPH3366	18	FALSE	60.6017	0.0021645	415	2	BPH3362,BPH3366
8	BPH3389--BPH3460	BPH3389	BPH3460	0	FALSE	50.9954	0.428571	560	2	BPH3389,BPH3460
8	BPH2824--BPH2825	BPH2824	BPH2825	0	FALSE	-1.84537	0.937229	414	2	BPH2824,BPH2825
8	BPH2833--BPH2831	BPH2833	BPH2831	0	FALSE	-13.5635	0.0519481	545	3	BPH2831,BPH2832,BPH2833
8	BPH3736--BPH3352	BPH3736	BPH3352	1	FALSE	-13.9241	0.588745	737	2	BPH3352,BPH3736
8	BPH2943--BPH2942	BPH2943	BPH2942	0	FALSE	3.36698	0.699134	636	2	BPH2942,BPH2943
8	BPH2705--BPH2704	BPH2705	BPH2704	0	TRUE	-36.4124	0.0151515	700	2	BPH2704,BPH2705
8	BPH3489--BPH3501	BPH3489	BPH3501	2	FALSE	9.97263	0.125541	690	2	BPH3489,BPH3501
8	BPH2770--BPH2771	BPH2770	BPH2771	2	FALSE	3.1817	0.937229	739	2	BPH2770,BPH2771
8	BPH3272--BPH3244	BPH3272	BPH3244	5	FALSE	23.1565	0.132035	526	3	BPH3244,BPH3284,BPH3272
8	BPH3282--BPH3274	BPH3282	BPH3274	3	TRUE	-85.2295	0.015873	648	2	BPH3274,BPH3282
8	BPH2888--BPH2887	BPH2888	BPH2887	0	FALSE	-2.50728	0.914286	735	2	BPH2887,BPH2888
8	BPH2861--BPH2862	BPH2861	BPH2862	1	FALSE	23.7964	0.428571	765	2	BPH2861,BPH2862
8	BPH2738--BPH2737	BPH2738	BPH2737	1	FALSE	9.31894	0.0649351	557	2	BPH2737,BPH2738
8	BPH2751--BPH2750	BPH2751	BPH2750	1	FALSE	12.9316	0.588745	764	2	BPH2750,BPH2751
8	BPH3738--BPH3381	BPH3738	BPH3381	1	FALSE	6.95866	0.930736	725	2	BPH3381,BPH3738
8	BPH3304--BPH3268	BPH3304	BPH3268	2	FALSE	18.7354	0.792208	662	2	BPH3268,BPH3304
8	BPH2877--BPH2876	BPH2877	BPH2876	4	FALSE	20.6942	0.699134	656	2	BPH2876,BPH2877
8	BPH2708--BPH2709	BPH2708	BPH2709	0	FALSE	7.26096	0.420635	591	2	BPH2708,BPH2709
8	BPH2761--BPH2752	BPH2761	BPH2752	0	FALSE	43.1603	0.031746	750	2	BPH2752,BPH2761
8	BPH2864--BPH2863	BPH2864	BPH2863	0	FALSE	-1.65592	0.937229	755	2	BPH2863,BPH2864
8	BPH2858--BPH2720	BPH2858	BPH2720	38	TRUE	-79.6552	0.0021645	677	3	BPH2720,BPH2742,BPH2858
8	BPH2819--BPH2820	BPH2819	BPH2820	2	FALSE	15.0066	0.24026	629	2	BPH2819,BPH2820
8	BPH3524--BPH3548	BPH3524	BPH3548	1	FALSE	39.9747	0.114286	757	2	BPH3524,BPH3548
8	BPH2966--BPH2965	BPH2966	BPH2965	0	FALSE	-9.15242	0.24026	531	2	BPH2965,BPH2966
8	BPH3396--BPH3481	BPH3396	BPH3481	7	FALSE	-13.779	0.0666667	671	2	BPH3396,BPH3481
8	BPH3477--BPH3479	BPH3477	BPH3479	15	FALSE	3.12279	0.792208	736	2	BPH3477,BPH3479
8	BPH2873--BPH2872	BPH2873	BPH2872	0	FALSE	12.0854	0.536797	646	2	BPH2872,BPH2873
8	BPH3508--BPH3482	BPH3508	BPH3482	8	FALSE	-19.4178	0.114286	600	2	BPH3482,BPH3508
8	BPH2890--BPH2891	BPH2890	BPH2891	0	FALSE	16.8054	0.150794	659	2	BPH2890,BPH2891
8	BPH2867--BPH2866	BPH2867	BPH2866	2	FALSE	22.3157	0.24026	558	2	BPH2866,BPH2867
8	BPH2808--BPH2807	BPH2808	BPH2807	0	FALSE	6.67639	0.407867	688	2	BPH2807,BPH2808
8	BPH2850--BPH2849	BPH2850	BPH2849	1	FALSE	-7.89025	0.662338	645	2	BPH2849,BPH2850
8	BPH2987--BPH2988	BPH2987	BPH2988	0	FALSE	-15.2499	0.420635	770	2	BPH2987,BPH2988
8	BPH2898--BPH2897	BPH2898	BPH2897	0	FALSE	-2.0829	0.937229	772	2	BPH2897,BPH2898
8	BPH2952--BPH2953	BPH2952	BPH2953	2	FALSE	9.27368	0.177489	726	2	BPH2952,BPH2953
9	BPH2869--BPH3706	BPH2869	BPH3706	44	FALSE	-42.198	0.00793651	482	23	BPH2787,BPH3704,BPH3702,BPH3666,BPH3636,BPH3692,BPH3668,BPH3710,BPH3706,BPH3757,BPH3658,BPH3672,BPH3648,BPH3650,BPH3652,BPH3694,BPH3755,BPH3640,BPH3688,BPH3662,BPH2869,BPH3670,BPH3638
9	BPH3742--BPH3745	BPH3742	BPH3745	7	FALSE	-11.6997	0.428571	430	9	BPH3401,BPH3493,BPH3742,BPH3417,BPH3743,BPH3744,BPH3745,BPH3463,BPH3741
9	BPH3236--BPH3316	BPH3236	BPH3316	95	FALSE	-45.8284	0.309524	524	3	BPH3236,BPH3258,BPH3316
9	BPH3372--BPH3376	BPH3372	BPH3376	35	FALSE	39.0895	0.004329	421	4	BPH2726,BPH2727,BPH3376,BPH3372
9	BPH3527--BPH3529	BPH3527	BPH3529	48	FALSE	-31.413	0.0649351	439	4	BPH3523,BPH3527,BPH3529,BPH3739
9	BPH3328--BPH3545	BPH3328	BPH3545	87	FALSE	7.56579	0.309524	461	15	BPH2779,BPH3394,BPH2907,BPH3328,BPH3485,BPH3511,BPH3356,BPH3737,BPH3547,BPH3360,BPH3535,BPH3752,BPH3346,BPH3443,BPH3545
9	BPH2754--BPH2755	BPH2754	BPH2755	0	FALSE	-2.77606	1	630	2	BPH2754,BPH2755
9	BPH3260--BPH3262	BPH3260	BPH3262	10	FALSE	-35.1237	0.329004	511	6	BPH3208,BPH3250,BPH3220,BPH3260,BPH3306,BPH3262
9	BPH2976--BPH2980	BPH2976	BPH2980	1	FALSE	1.7742	1	411	2	BPH2976,BPH2980
9	BPH2718--BPH2798	BPH2718	BPH2798	52	FALSE	-20.7118	0.0734266	456	5	BPH2718,BPH2946,BPH2798,BPH2799,BPH2800
9	BPH3403--BPH3439	BPH3403	BPH3439	15	FALSE	-55.4589	0.004329	444	10	BPH2947,BPH2948,BPH3439,BPH3453,BPH3457,BPH3431,BPH3469,BPH3403,BPH3413,BPH3499
9	BPH3753--BPH3686	BPH3753	BPH3686	53	FALSE	4.59263	0.930736	505	6	BPH3643,BPH3700,BPH3674,BPH3753,BPH3682,BPH3686
9	BPH3632--BPH3664	BPH3632	BPH3664	22	FALSE	11.8277	0.699134	516	3	BPH3632,BPH3696,BPH3664
9	BPH2819--BPH2820	BPH2819	BPH2820	2	FALSE	15.0066	0.24026	629	2	BPH2819,BPH2820
9	BPH2873--BPH2872	BPH2873	BPH2872	0	FALSE	12.0854	0.536797	646	2	BPH2872,BPH2873
9	BPH2990--BPH2991	BPH2990	BPH2991	0	FALSE	1.76518	0.588745	544	2	BPH2990,BPH2991
9	BPH3434--BPH3423	BPH3434	BPH3423	0	FALSE	41.9255	0.015873	601	3	BPH3423,BPH3434,BPH3746
9	BPH3282--BPH3274	BPH3282	BPH3274	3	TRUE	-85.2295	0.015873	648	2	BPH3274,BPH3282
9	BPH2738--BPH2737	BPH2738	BPH2737	1	FALSE	9.31894	0.0649351	557	2	BPH2737,BPH2738
9	BPH2861--BPH2862	BPH2861	BPH2862	1	FALSE	23.7964	0.428571	765	2	BPH2861,BPH2862
9	BPH2896--BPH2710	BPH2896	BPH2710	51	FALSE	-51.1481	0.0151515	419	3	BPH2710,BPH2780,BPH2896
9	BPH3479--BPH3477	BPH3479	BPH3477	16	FALSE	-3.12279	0.792208	736	2	BPH3477,BPH3479
9	BPH2864--BPH2863	BPH2864	BPH2863	0	FALSE	-1.65592	0.937229	755	2	BPH2863,BPH2864
9	BPH3433--BPH3748	BPH3433	BPH3748	0	FALSE	-26.3053	0.00952381	438	2	BPH3433,BPH3748
9	BPH2729--BPH2730	BPH2729	BPH2730	6	FALSE	116.568	4.11353e-05	731	2	BPH2729,BPH2730
9	BPH2778--BPH2777	BPH2778	BPH2777	0	FALSE	7.81792	0.0930736	759	2	BPH2777,BPH2778
9	BPH3588--BPH3584	BPH3588	BPH3584	9	FALSE	-6.1861	0.484848	705	2	BPH3584,BPH3588
9	BPH2924--BPH2926	BPH2924	BPH2926	4	FALSE	-123.866	0.0021645	584	4	BPH2922,BPH2923,BPH2924,BPH2926
9	BPH2867--BPH2866	BPH2867	BPH2866	2	FALSE	22.3157	0.24026	558	2	BPH2866,BPH2867
9	BPH3226--BPH3292	BPH3226	BPH3292	5	FALSE	2.89786	0.792208	521	2	BPH3226,BPH3292
9	BPH2978--BPH2977	BPH2978	BPH2977	1	FALSE	-15.6816	0.4	412	3	BPH2977,BPH2979,BPH2978
9	BPH2812--BPH2813	BPH2812	BPH2813	0	FALSE	-0.116109	0.930736	576	4	BPH2812,BPH2815,BPH2814,BPH2813
9	BPH2825--BPH2824	BPH2825	BPH2824	0	FALSE	1.84537	0.937229	414	2	BPH2824,BPH2825
9	BPH2890--BPH2891	BPH2890	BPH2891	0	FALSE	16.8054	0.150794	659	2	BPH2890,BPH2891
9	BPH2962--BPH2963	BPH2962	BPH2963	5	FALSE	0.683086	0.818182	596	3	BPH2962,BPH2963,BPH2964
9	BPH3304--BPH3268	BPH3304	BPH3268	2	FALSE	18.7354	0.792208	662	2	BPH3268,BPH3304
9	BPH2832--BPH2831	BPH2832	BPH2831	0	FALSE	1.12586	0.792208	545	3	BPH2831,BPH2832,BPH2833
9	BPH2960--BPH2961	BPH2960	BPH2961	0	FALSE	0.570536	0.792208	644	2	BPH2960,BPH2961
9	BPH2801--BPH2802	BPH2801	BPH2802	9	FALSE	16.3863	0.141858	708	2	BPH2801,BPH2802
9	BPH2876--BPH2877	BPH2876	BPH2877	4	FALSE	-20.6942	0.699134	656	2	BPH2876,BPH2877
9	BPH2752--BPH2761	BPH2752	BPH2761	0	TRUE	-43.1603	0.031746	750	2	BPH2752,BPH2761
9	BPH3501--BPH3489	BPH3501	BPH3489	3	FALSE	-9.97263	0.125541	690	2	BPH3489,BPH3501
9	BPH3381--BPH3738	BPH3381	BPH3738	2	FALSE	-6.95866	0.930736	725	2	BPH3381,BPH3738
9	BPH2857--BPH2852	BPH2857	BPH2852	1	FALSE	-9.66952	0.484848	664	2	BPH2852,BPH2857
9	BPH2988--BPH2987	BPH2988	BPH2987	0	FALSE	15.2499	0.420635	770	2	BPH2987,BPH2988
9	BPH2747--BPH2748	BPH2747	BPH2748	1	FALSE	6.33616	0.662338	427	2	BPH2747,BPH2748
9	BPH2888--BPH2887	BPH2888	BPH2887	0	FALSE	-2.50728	0.914286	735	2	BPH2887,BPH2888
9	BPH3548--BPH3524	BPH3548	BPH3524	0	FALSE	-39.9747	0.114286	757	2	BPH3524,BPH3548
9	BPH2705--BPH2704	BPH2705	BPH2704	0	TRUE	-36.4124	0.0151515	700	2	BPH2704,BPH2705
9	BPH3568--BPH3590	BPH3568	BPH3590	37	TRUE	-46.2301	0.017316	695	2	BPH3590,BPH3568
9	BPH3734--BPH3337	BPH3734	BPH3337	3	FALSE	-3.64288	0.818182	532	2	BPH3337,BPH3734
9	BPH2953--BPH2952	BPH2953	BPH2952	2	FALSE	-9.27368	0.177489	726	2	BPH2952,BPH2953
9	BPH3368--BPH3348	BPH3368	BPH3348	65	TRUE	-56.3119	0.004329	442	3	BPH3348,BPH3735,BPH3368
9	BPH3284--BPH3272	BPH3284	BPH3272	9	FALSE	-19.8051	0.246753	526	3	BPH3244,BPH3284,BPH3272
9	BPH2858--BPH2720	BPH2858	BPH2720	38	TRUE	-79.6552	0.0021645	677	3	BPH2720,BPH2742,BPH2858
9	BPH3459--BPH3462	BPH3459	BPH3462	2	FALSE	-27.469	0.171429	628	2	BPH3459,BPH3462
9	BPH2974--BPH2973	BPH2974	BPH2973	0	FALSE	33.1289	0.0519481	768	3	BPH2973,BPH2975,BPH2974
9	BPH2807--BPH2808	BPH2807	BPH2808	0	FALSE	-6.67639	0.407867	688	2	BPH2807,BPH2808
9	BPH2843--BPH2842	BPH2843	BPH2842	0	FALSE	-7.19808	0.24026	686	2	BPH2842,BPH2843
9	BPH3389--BPH3460	BPH3389	BPH3460	0	FALSE	50.9954	0.428571	560	2	BPH3389,BPH3460
9	BPH3736--BPH3352	BPH3736	BPH3352	1	FALSE	-13.9241	0.588745	737	2	BPH3352,BPH3736
9	BPH2841--BPH2840	BPH2841	BPH2840	0	FALSE	1.64172	0.484848	548	2	BPH2840,BPH2841
9	BPH2714--BPH2713	BPH2714	BPH2713	2	FALSE	-17.3353	0.177489	716	2	BPH2713,BPH2714
9	BPH2883--BPH2884	BPH2883	BPH2884	0	FALSE	0.76274	0.84127	634	2	BPH2883,BPH2884
9	BPH3482--BPH3508	BPH3482	BPH3508	8	FALSE	19.4178	0.114286	600	2	BPH3482,BPH3508
9	BPH3733--BPH3336	BPH3733	BPH3336	2	FALSE	115.831	0.004329	649	2	BPH3336,BPH3733
9	BPH2898--BPH2897	BPH2898	BPH2897	0	FALSE	-2.0829	0.937229	772	2	BPH2897,BPH2898
9	BPH2770--BPH2771	BPH2770	BPH2771	2	FALSE	3.1817	0.937229	739	2	BPH2770,BPH2771
9	BPH2763--BPH2823	BPH2763	BPH2823	161	FALSE	11.6822	0.00865801	657	3	BPH2763,BPH2764,BPH2823
9	BPH3366--BPH3362	BPH3366	BPH3362	17	TRUE	-60.6017	0.0021645	415	2	BPH3362,BPH3366
9	BPH2943--BPH2942	BPH2943	BPH2942	0	FALSE	3.36698	0.699134	636	2	BPH2942,BPH2943
9	BPH3294--BPH3246	BPH3294	BPH3246	6	FALSE	-23.2762	0.0411255	580	2	BPH3246,BPH3294
9	BPH3749--BPH3437	BPH3749	BPH3437	4	FALSE	-2.2445	0.699134	693	2	BPH3437,BPH3749
9	BPH3338--BPH3340	BPH3338	BPH3340	7	FALSE	-145.303	0.0285714	740	3	BPH2792,BPH3340,BPH3338
9	BPH3751--BPH3750	BPH3751	BPH3750	1	FALSE	113.455	0.00865801	679	2	BPH3750,BPH3751
9	BPH2850--BPH2849	BPH2850	BPH2849	1	FALSE	-7.89025	0.662338	645	2	BPH2849,BPH2850
9	BPH3684--BPH3660	BPH3684	BPH3660	52	FALSE	2.24833	0.818182	510	2	BPH3660,BPH3684
9	BPH2966--BPH2965	BPH2966	BPH2965	0	FALSE	-9.15242	0.24026	531	2	BPH2965,BPH2966
9	BPH3602--BPH3612	BPH3602	BPH3612	10	FALSE	-7.65837	0.309524	681	2	BPH3612,BPH3602
9	BPH3270--BPH3216	BPH3270	BPH3216	2	FALSE	-9.95811	0.555556	567	2	BPH3216,BPH3270
9	BPH2784--BPH2860	BPH2784	BPH2860	134	FALSE	114.455	0.00952381	661	2	BPH2784,BPH2860
9	BPH2751--BPH2750	BPH2751	BPH2750	1	FALSE	12.9316	0.588745	764	2	BPH2750,BPH2751
9	BPH2709--BPH2708	BPH2709	BPH2708	1	FALSE	-7.26096	0.420635	591	2	BPH2708,BPH2709
9	BPH3747--BPH3427	BPH3747	BPH3427	2	FALSE	-7.72504	0.309524	692	2	BPH3427,BPH3747
9	BPH3396--BPH3481	BPH3396	BPH3481	7	FALSE	-13.779	0.0666667	671	2	BPH3396,BPH3481
9	BPH2881--BPH2882	BPH2881	BPH2882	12	FALSE	1.33085	0.914286	615	2	BPH2881,BPH2882
9	BPH3628--BPH3596	BPH3628	BPH3596	21	FALSE	-15.1389	0.329004	581	2	BPH3596,BPH3628
10	BPH3262--BPH3682	BPH3262	BPH3682	60	FALSE	36.0567	0.030303	479	38	BPH2787,BPH3704,BPH3702,BPH3666,BPH3636,BPH3692,BPH3668,BPH3710,BPH3706,BPH3757,BPH3658,BPH3672,BPH3648,BPH3650,BPH3652,BPH3694,BPH3755,BPH3640,BPH3688,BPH3662,BPH2869,BPH3670,BPH3638,BPH3202,BPH3643,BPH3700,BPH3674,BPH3753,BPH3682,BPH3686,BPH3660,BPH3684,BPH3208,BPH3250,BPH3220,BPH3260,BPH3306,BPH3262
10	BPH2849--BPH2850	BPH2849	BPH2850	1	FALSE	7.89025	0.662338	645	2	BPH2849,BPH2850
10	BPH3493--BPH3743	BPH3493	BPH3743	5	FALSE	18.391	0.0822511	430	9	BPH3401,BPH3493,BPH3742,BPH3417,BPH3743,BPH3744,BPH3745,BPH3463,BPH3741
10	BPH2979--BPH2976	BPH2979	BPH2976	1	FALSE	-36.3145	0.2	410	5	BPH2977,BPH2979,BPH2978,BPH2976,BPH2980
10	BPH3751--BPH3750	BPH3751	BPH3750	1	FALSE	113.455	0.00865801	679	2	BPH3750,BPH3751
10	BPH2730--BPH2728	BPH2730	BPH2728	0	FALSE	-6.59919	0.604813	730	3	BPH2728,BPH2729,BPH2730
10	BPH3376--BPH2727	BPH3376	BPH2727	29	FALSE	-13.1369	0.413586	422	3	BPH2726,BPH2727,BPH3376
10	BPH3204--BPH3226	BPH3204	BPH3226	6	FALSE	30.7573	0.730159	520	3	BPH3204,BPH3226,BPH3292
10	BPH2754--BPH2755	BPH2754	BPH2755	0	FALSE	-2.77606	1	630	2	BPH2754,BPH2755
10	BPH2714--BPH2713	BPH2714	BPH2713	2	FALSE	-17.3353	0.177489	716	2	BPH2713,BPH2714
10	BPH3459--BPH3462	BPH3459	BPH3462	2	FALSE	-27.469	0.171429	628	2	BPH3459,BPH3462
10	BPH3435--BPH3382	BPH3435	BPH3382	21	FALSE	57.2537	0.0021645	417	5	BPH2710,BPH2780,BPH2896,BPH3382,BPH3435
10	BPH3547--BPH3473	BPH3547	BPH3473	65	FALSE	-74.7975	0.00793651	460	16	BPH2779,BPH3394,BPH2907,BPH3328,BPH3485,BPH3511,BPH3356,BPH3737,BPH3547,BPH3360,BPH3535,BPH3752,BPH3346,BPH3443,BPH3545,BPH3473
10	BPH2750--BPH2751	BPH2750	BPH2751	2	FALSE	-12.9316	0.588745	764	2	BPH2750,BPH2751
10	BPH2872--BPH2873	BPH2872	BPH2873	0	FALSE	-12.0854	0.536797	646	2	BPH2872,BPH2873
10	BPH2784--BPH2860	BPH2784	BPH2860	134	FALSE	114.455	0.00952381	661	2	BPH2784,BPH2860
10	BPH3596--BPH3628	BPH3596	BPH3628	20	FALSE	15.1389	0.329004	581	2	BPH3596,BPH3628
10	BPH3482--BPH3508	BPH3482	BPH3508	8	FALSE	19.4178	0.114286	600	2	BPH3482,BPH3508
10	BPH3588--BPH3584	BPH3588	BPH3584	9	FALSE	-6.1861	0.484848	705	2	BPH3584,BPH3588
10	BPH2812--BPH2815	BPH2812	BPH2815	0	FALSE	-2.00875	0.937229	578	2	BPH2812,BPH2815
10	BPH3338--BPH3340	BPH3338	BPH3340	7	FALSE	-145.303	0.0285714	740	3	BPH2792,BPH3340,BPH3338
10	BPH2861--BPH2862	BPH2861	BPH2862	1	FALSE	23.7964	0.428571	765	2	BPH2861,BPH2862
10	BPH3739--BPH3523	BPH3739	BPH3523	46	FALSE	55.779	0.004329	439	4	BPH3523,BPH3527,BPH3529,BPH3739
10	BPH2823--BPH2763	BPH2823	BPH2763	157	FALSE	-11.6822	0.00865801	657	3	BPH2763,BPH2764,BPH2823
10	BPH2799--BPH2946	BPH2799	BPH2946	51	FALSE	29.014	0.0021645	456	5	BPH2718,BPH2946,BPH2798,BPH2799,BPH2800
10	BPH3632--BPH3696	BPH3632	BPH3696	1	FALSE	17.3031	0.309524	517	2	BPH3632,BPH3696
10	BPH3433--BPH3748	BPH3433	BPH3748	0	FALSE	-26.3053	0.00952381	438	2	BPH3433,BPH3748
10	BPH3403--BPH3457	BPH3403	BPH3457	26	FALSE	-51.8596	0.004329	444	10	BPH2947,BPH2948,BPH3439,BPH3453,BPH3457,BPH3431,BPH3469,BPH3403,BPH3413,BPH3499
10	BPH3749--BPH3437	BPH3749	BPH3437	4	FALSE	-2.2445	0.699134	693	2	BPH3437,BPH3749
10	BPH3276--BPH3236	BPH3276	BPH3236	126	FALSE	36.0999	0.428571	523	4	BPH3236,BPH3258,BPH3316,BPH3276
10	BPH2925--BPH2923	BPH2925	BPH2923	3	FALSE	-100.514	0.0021645	583	5	BPH2922,BPH2923,BPH2924,BPH2926,BPH2925
10	BPH2952--BPH2953	BPH2952	BPH2953	2	FALSE	9.27368	0.177489	726	2	BPH2952,BPH2953
10	BPH3481--BPH3396	BPH3481	BPH3396	7	FALSE	13.779	0.0666667	671	2	BPH3396,BPH3481
10	BPH3746--BPH3434	BPH3746	BPH3434	0	TRUE	-29.3535	0.004329	602	2	BPH3434,BPH3746
10	BPH2963--BPH2964	BPH2963	BPH2964	5	TRUE	-40.5691	0.0021645	597	2	BPH2963,BPH2964
10	BPH3366--BPH3362	BPH3366	BPH3362	17	TRUE	-60.6017	0.0021645	415	2	BPH3362,BPH3366
10	BPH3216--BPH3270	BPH3216	BPH3270	2	FALSE	9.95811	0.555556	567	2	BPH3216,BPH3270
10	BPH2876--BPH2700	BPH2876	BPH2700	150	FALSE	-37.4043	0.179654	655	3	BPH2700,BPH2876,BPH2877
10	BPH2883--BPH2884	BPH2883	BPH2884	0	FALSE	0.76274	0.84127	634	2	BPH2883,BPH2884
10	BPH3272--BPH3284	BPH3272	BPH3284	10	FALSE	19.8051	0.246753	526	3	BPH3244,BPH3284,BPH3272
10	BPH2858--BPH2720	BPH2858	BPH2720	38	TRUE	-79.6552	0.0021645	677	3	BPH2720,BPH2742,BPH2858
10	BPH3477--BPH3479	BPH3477	BPH3479	15	FALSE	3.12279	0.792208	736	2	BPH3477,BPH3479
10	BPH2960--BPH2959	BPH2960	BPH2959	0	FALSE	12.3847	0.662338	643	3	BPH2959,BPH2960,BPH2961
10	BPH2975--BPH2974	BPH2975	BPH2974	0	FALSE	-6.43345	0.428571	768	3	BPH2973,BPH2975,BPH2974
10	BPH2833--BPH2831	BPH2833	BPH2831	0	FALSE	-13.5635	0.0519481	545	3	BPH2831,BPH2832,BPH2833
10	BPH2737--BPH2738	BPH2737	BPH2738	1	FALSE	-9.31894	0.0649351	557	2	BPH2737,BPH2738
10	BPH3733--BPH3336	BPH3733	BPH3336	2	FALSE	115.831	0.004329	649	2	BPH3336,BPH3733
10	BPH3738--BPH3381	BPH3738	BPH3381	1	FALSE	6.95866	0.930736	725	2	BPH3381,BPH3738
10	BPH2990--BPH2991	BPH2990	BPH2991	0	FALSE	1.76518	0.588745	544	2	BPH2990,BPH2991
10	BPH2857--BPH2852	BPH2857	BPH2852	1	FALSE	-9.66952	0.484848	664	2	BPH2852,BPH2857
10	BPH2819--BPH2820	BPH2819	BPH2820	2	FALSE	15.0066	0.24026	629	2	BPH2819,BPH2820
10	BPH3735--BPH3368	BPH3735	BPH3368	59	FALSE	50.4856	0.0021645	442	3	BPH3348,BPH3735,BPH3368
10	BPH3602--BPH3612	BPH3602	BPH3612	10	FALSE	-7.65837	0.309524	681	2	BPH3612,BPH3602
10	BPH2708--BPH2709	BPH2708	BPH2709	0	FALSE	7.26096	0.420635	591	2	BPH2708,BPH2709
10	BPH2802--BPH2803	BPH2802	BPH2803	30	FALSE	-12.719	0.393939	707	3	BPH2801,BPH2802,BPH2803
10	BPH3389--BPH3460	BPH3389	BPH3460	0	FALSE	50.9954	0.428571	560	2	BPH3389,BPH3460
10	BPH3246--BPH3294	BPH3246	BPH3294	8	FALSE	23.2762	0.0411255	580	2	BPH3246,BPH3294
10	BPH3747--BPH3427	BPH3747	BPH3427	2	FALSE	-7.72504	0.309524	692	2	BPH3427,BPH3747
10	BPH2705--BPH2704	BPH2705	BPH2704	0	TRUE	-36.4124	0.0151515	700	2	BPH2704,BPH2705
10	BPH2807--BPH2808	BPH2807	BPH2808	0	FALSE	-6.67639	0.407867	688	2	BPH2807,BPH2808
10	BPH3352--BPH3736	BPH3352	BPH3736	2	FALSE	13.9241	0.588745	737	2	BPH3352,BPH3736
10	BPH2882--BPH2881	BPH2882	BPH2881	13	FALSE	-1.33085	0.914286	615	2	BPH2881,BPH2882
10	BPH2777--BPH2778	BPH2777	BPH2778	0	FALSE	-7.81792	0.0930736	759	2	BPH2777,BPH2778
10	BPH2770--BPH2771	BPH2770	BPH2771	2	FALSE	3.1817	0.937229	739	2	BPH2770,BPH2771
10	BPH2761--BPH2752	BPH2761	BPH2752	0	FALSE	43.1603	0.031746	750	2	BPH2752,BPH2761
10	BPH3568--BPH3590	BPH3568	BPH3590	37	TRUE	-46.2301	0.017316	695	2	BPH3590,BPH3568
10	BPH3548--BPH3524	BPH3548	BPH3524	0	FALSE	-39.9747	0.114286	757	2	BPH3524,BPH3548
10	BPH2866--BPH2867	BPH2866	BPH2867	1	FALSE	-22.3157	0.24026	558	2	BPH2866,BPH2867
10	BPH2943--BPH2942	BPH2943	BPH2942	0	FALSE	3.36698	0.699134	636	2	BPH2942,BPH2943
10	BPH2988--BPH2987	BPH2988	BPH2987	0	FALSE	15.2499	0.420635	770	2	BPH2987,BPH2988
10	BPH2847--BPH2783	BPH2847	BPH2783	42	FALSE	-6.23793	0.47619	684	4	BPH2783,BPH2842,BPH2843,BPH2847
10	BPH2898--BPH2897	BPH2898	BPH2897	0	FALSE	-2.0829	0.937229	772	2	BPH2897,BPH2898
10	BPH2863--BPH2864	BPH2863	BPH2864	0	FALSE	1.65592	0.937229	755	2	BPH2863,BPH2864
10	BPH2965--BPH2966	BPH2965	BPH2966	0	FALSE	9.15242	0.24026	531	2	BPH2965,BPH2966
10	BPH2888--BPH2887	BPH2888	BPH2887	0	FALSE	-2.50728	0.914286	735	2	BPH2887,BPH2888
10	BPH3734--BPH3337	BPH3734	BPH3337	3	FALSE	-3.64288	0.818182	532	2	BPH3337,BPH3734
10	BPH2840--BPH2841	BPH2840	BPH2841	0	FALSE	-1.64172	0.484848	548	2	BPH2840,BPH2841
10	BPH2890--BPH2891	BPH2890	BPH2891	0	FALSE	16.8054	0.150794	659	2	BPH2890,BPH2891
10	BPH3268--BPH3304	BPH3268	BPH3304	2	FALSE	-18.7354	0.792208	662	2	BPH3268,BPH3304
10	BPH3489--BPH3501	BPH3489	BPH3501	2	FALSE	9.97263	0.125541	690	2	BPH3489,BPH3501
10	BPH2825--BPH2824	BPH2825	BPH2824	0	FALSE	1.84537	0.937229	414	2	BPH2824,BPH2825
10	BPH3274--BPH3282	BPH3274	BPH3282	1	FALSE	85.2295	0.015873	648	2	BPH3274,BPH3282
10	BPH2748--BPH2747	BPH2748	BPH2747	2	FALSE	-6.33616	0.662338	427	2	BPH2747,BPH2748
11	BPH3710--BPH3672	BPH3710	BPH3672	5	FALSE	64.311	0.00952381	490	8	BPH3636,BPH3692,BPH3668,BPH3710,BPH3706,BPH3757,BPH3658,BPH3672
11	BPH2730--BPH2729	BPH2730	BPH2729	5	FALSE	-116.568	4.11353e-05	731	2	BPH2729,BPH2730
11	BPH3433--BPH3743	BPH3433	BPH3743	22	FALSE	28.4873	0.015873	429	11	BPH3401,BPH3493,BPH3742,BPH3417,BPH3743,BPH3744,BPH3745,BPH3463,BPH3741,BPH3433,BPH3748
11	BPH2850--BPH2849	BPH2850	BPH2849	1	FALSE	-7.89025	0.662338	645	2	BPH2849,BPH2850
11	BPH3356--BPH3511	BPH3356	BPH3511	70	FALSE	1.16091	1	466	5	BPH3328,BPH3485,BPH3511,BPH3356,BPH3737
11	BPH2783--BPH2847	BPH2783	BPH2847	33	FALSE	6.23793	0.47619	684	4	BPH2783,BPH2842,BPH2843,BPH2847
11	BPH3262--BPH3306	BPH3262	BPH3306	10	FALSE	65.1135	0.329004	511	6	BPH3208,BPH3250,BPH3220,BPH3260,BPH3306,BPH3262
11	BPH3643--BPH3686	BPH3643	BPH3686	49	FALSE	33.4192	0.0930736	505	6	BPH3643,BPH3700,BPH3674,BPH3753,BPH3682,BPH3686
11	BPH2710--BPH2780	BPH2710	BPH2780	45	FALSE	31.6049	0.00865801	419	3	BPH2710,BPH2780,BPH2896
11	BPH2713--BPH2714	BPH2713	BPH2714	2	FALSE	17.3353	0.177489	716	2	BPH2713,BPH2714
11	BPH3403--BPH3439	BPH3403	BPH3439	15	FALSE	-55.4589	0.004329	444	10	BPH2947,BPH2948,BPH3439,BPH3453,BPH3457,BPH3431,BPH3469,BPH3403,BPH3413,BPH3499
11	BPH3735--BPH3348	BPH3735	BPH3348	0	FALSE	-5.82626	0.177489	443	2	BPH3348,BPH3735
11	BPH3545--BPH3346	BPH3545	BPH3346	58	FALSE	36.4419	0.0411255	473	3	BPH3346,BPH3443,BPH3545
11	BPH3750--BPH3751	BPH3750	BPH3751	0	TRUE	-113.455	0.00865801	679	2	BPH3750,BPH3751
11	BPH2974--BPH2973	BPH2974	BPH2973	0	FALSE	33.1289	0.0519481	768	3	BPH2973,BPH2975,BPH2974
11	BPH2898--BPH2897	BPH2898	BPH2897	0	FALSE	-2.0829	0.937229	772	2	BPH2897,BPH2898
11	BPH2866--BPH2867	BPH2866	BPH2867	1	FALSE	-22.3157	0.24026	558	2	BPH2866,BPH2867
11	BPH2982--BPH2979	BPH2982	BPH2979	17	FALSE	34.8102	0.1	408	7	BPH2982,BPH2981,BPH2977,BPH2979,BPH2978,BPH2976,BPH2980
11	BPH2799--BPH2946	BPH2799	BPH2946	51	FALSE	29.014	0.0021645	456	5	BPH2718,BPH2946,BPH2798,BPH2799,BPH2800
11	BPH2963--BPH2964	BPH2963	BPH2964	5	TRUE	-40.5691	0.0021645	597	2	BPH2963,BPH2964
11	BPH2779--BPH3394	BPH2779	BPH3394	38	FALSE	1.75762	0.662338	465	2	BPH2779,BPH3394
11	BPH3258--BPH3236	BPH3258	BPH3236	5	FALSE	9.1088	1	525	2	BPH3236,BPH3258
11	BPH2965--BPH2966	BPH2965	BPH2966	0	FALSE	9.15242	0.24026	531	2	BPH2965,BPH2966
11	BPH2771--BPH2770	BPH2771	BPH2770	2	FALSE	-3.1817	0.937229	739	2	BPH2770,BPH2771
11	BPH2720--BPH2858	BPH2720	BPH2858	39	FALSE	79.6552	0.0021645	677	3	BPH2720,BPH2742,BPH2858
11	BPH3427--BPH3747	BPH3427	BPH3747	1	FALSE	7.72504	0.309524	692	2	BPH3427,BPH3747
11	BPH3650--BPH3652	BPH3650	BPH3652	5	FALSE	-77.5707	0.0021645	498	3	BPH3648,BPH3650,BPH3652
11	BPH3664--BPH3696	BPH3664	BPH3696	24	FALSE	5.47538	0.937229	516	3	BPH3632,BPH3696,BPH3664
11	BPH2750--BPH2751	BPH2750	BPH2751	2	FALSE	-12.9316	0.588745	764	2	BPH2750,BPH2751
11	BPH3688--BPH3640	BPH3688	BPH3640	22	FALSE	0.380341	1	501	2	BPH3640,BPH3688
11	BPH2923--BPH2926	BPH2923	BPH2926	3	FALSE	-6.05121	0.484848	584	4	BPH2922,BPH2923,BPH2924,BPH2926
11	BPH3244--BPH3272	BPH3244	BPH3272	4	FALSE	-23.1565	0.132035	526	3	BPH3244,BPH3284,BPH3272
11	BPH3376--BPH3372	BPH3376	BPH3372	35	FALSE	-39.0895	0.004329	421	4	BPH2726,BPH2727,BPH3376,BPH3372
11	BPH3337--BPH3734	BPH3337	BPH3734	4	FALSE	3.64288	0.818182	532	2	BPH3337,BPH3734
11	BPH2841--BPH2840	BPH2841	BPH2840	0	FALSE	1.64172	0.484848	548	2	BPH2840,BPH2841
11	BPH3226--BPH3204	BPH3226	BPH3204	4	FALSE	-30.7573	0.730159	520	3	BPH3204,BPH3226,BPH3292
11	BPH3523--BPH3739	BPH3523	BPH3739	42	TRUE	-55.779	0.004329	439	4	BPH3523,BPH3527,BPH3529,BPH3739
11	BPH2990--BPH2991	BPH2990	BPH2991	0	FALSE	1.76518	0.588745	544	2	BPH2990,BPH2991
11	BPH2876--BPH2877	BPH2876	BPH2877	4	FALSE	-20.6942	0.699134	656	2	BPH2876,BPH2877
11	BPH2833--BPH2832	BPH2833	BPH2832	0	FALSE	-14.6894	0.025974	546	2	BPH2832,BPH2833
11	BPH2801--BPH2802	BPH2801	BPH2802	9	FALSE	16.3863	0.141858	708	2	BPH2801,BPH2802
11	BPH3396--BPH3481	BPH3396	BPH3481	7	FALSE	-13.779	0.0666667	671	2	BPH3396,BPH3481
11	BPH2748--BPH2747	BPH2748	BPH2747	2	FALSE	-6.33616	0.662338	427	2	BPH2747,BPH2748
11	BPH2988--BPH2987	BPH2988	BPH2987	0	FALSE	15.2499	0.420635	770	2	BPH2987,BPH2988
11	BPH3602--BPH3612	BPH3602	BPH3612	10	FALSE	-7.65837	0.309524	681	2	BPH3612,BPH3602
11	BPH3524--BPH3548	BPH3524	BPH3548	1	FALSE	39.9747	0.114286	757	2	BPH3524,BPH3548
11	BPH3246--BPH3294	BPH3246	BPH3294	8	FALSE	23.2762	0.0411255	580	2	BPH3246,BPH3294
11	BPH2862--BPH2861	BPH2862	BPH2861	2	FALSE	-23.7964	0.428571	765	2	BPH2861,BPH2862
11	BPH2873--BPH2872	BPH2873	BPH2872	0	FALSE	12.0854	0.536797	646	2	BPH2872,BPH2873
11	BPH3590--BPH3568	BPH3590	BPH3568	37	FALSE	46.2301	0.017316	695	2	BPH3590,BPH3568
11	BPH2824--BPH2825	BPH2824	BPH2825	0	FALSE	-1.84537	0.937229	414	2	BPH2824,BPH2825
11	BPH3670--BPH3638	BPH3670	BPH3638	31	FALSE	-15.5445	0.536797	502	3	BPH2869,BPH3670,BPH3638
11	BPH3282--BPH3274	BPH3282	BPH3274	3	TRUE	-85.2295	0.015873	648	2	BPH3274,BPH3282
11	BPH3434--BPH3423	BPH3434	BPH3423	0	FALSE	41.9255	0.015873	601	3	BPH3423,BPH3434,BPH3746
11	BPH2778--BPH2777	BPH2778	BPH2777	0	FALSE	7.81792	0.0930736	759	2	BPH2777,BPH2778
11	BPH3666--BPH3702	BPH3666	BPH3702	13	FALSE	4.30441	0.818182	486	4	BPH2787,BPH3704,BPH3702,BPH3666
11	BPH2961--BPH2960	BPH2961	BPH2960	0	FALSE	-0.570536	0.792208	644	2	BPH2960,BPH2961
11	BPH3477--BPH3479	BPH3477	BPH3479	15	FALSE	3.12279	0.792208	736	2	BPH3477,BPH3479
11	BPH3660--BPH3684	BPH3660	BPH3684	46	FALSE	-2.24833	0.818182	510	2	BPH3660,BPH3684
11	BPH2752--BPH2761	BPH2752	BPH2761	0	TRUE	-43.1603	0.031746	750	2	BPH2752,BPH2761
11	BPH3738--BPH3381	BPH3738	BPH3381	1	FALSE	6.95866	0.930736	725	2	BPH3381,BPH3738
11	BPH3584--BPH3588	BPH3584	BPH3588	9	FALSE	6.1861	0.484848	705	2	BPH3584,BPH3588
11	BPH3482--BPH3508	BPH3482	BPH3508	8	FALSE	19.4178	0.114286	600	2	BPH3482,BPH3508
11	BPH2823--BPH2763	BPH2823	BPH2763	157	FALSE	-11.6822	0.00865801	657	3	BPH2763,BPH2764,BPH2823
11	BPH3749--BPH3437	BPH3749	BPH3437	4	FALSE	-2.2445	0.699134	693	2	BPH3437,BPH3749
11	BPH3268--BPH3304	BPH3268	BPH3304	2	FALSE	-18.7354	0.792208	662	2	BPH3268,BPH3304
11	BPH3459--BPH3462	BPH3459	BPH3462	2	FALSE	-27.469	0.171429	628	2	BPH3459,BPH3462
11	BPH2738--BPH2737	BPH2738	BPH2737	1	FALSE	9.31894	0.0649351	557	2	BPH2737,BPH2738
11	BPH3489--BPH3501	BPH3489	BPH3501	2	FALSE	9.97263	0.125541	690	2	BPH3489,BPH3501
11	BPH2887--BPH2888	BPH2887	BPH2888	0	FALSE	2.50728	0.914286	735	2	BPH2887,BPH2888
11	BPH2815--BPH2814	BPH2815	BPH2814	0	FALSE	6.16038	0.484848	577	3	BPH2812,BPH2815,BPH2814
11	BPH3338--BPH3340	BPH3338	BPH3340	7	FALSE	-145.303	0.0285714	740	3	BPH2792,BPH3340,BPH3338
11	BPH2863--BPH2864	BPH2863	BPH2864	0	FALSE	1.65592	0.937229	755	2	BPH2863,BPH2864
11	BPH2890--BPH2891	BPH2890	BPH2891	0	FALSE	16.8054	0.150794	659	2	BPH2890,BPH2891
11	BPH3362--BPH3366	BPH3362	BPH3366	18	FALSE	60.6017	0.0021645	415	2	BPH3362,BPH3366
11	BPH2709--BPH2708	BPH2709	BPH2708	1	FALSE	-7.26096	0.420635	591	2	BPH2708,BPH2709
11	BPH2754--BPH2755	BPH2754	BPH2755	0	FALSE	-2.77606	1	630	2	BPH2754,BPH2755
11	BPH3360--BPH3752	BPH3360	BPH3752	87	FALSE	16.0196	0.0930736	471	3	BPH3360,BPH3535,BPH3752
11	BPH2860--BPH2784	BPH2860	BPH2784	147	TRUE	-114.455	0.00952381	661	2	BPH2784,BPH2860
11	BPH2819--BPH2820	BPH2819	BPH2820	2	FALSE	15.0066	0.24026	629	2	BPH2819,BPH2820
11	BPH2884--BPH2883	BPH2884	BPH2883	0	FALSE	-0.76274	0.84127	634	2	BPH2883,BPH2884
11	BPH2882--BPH2881	BPH2882	BPH2881	13	FALSE	-1.33085	0.914286	615	2	BPH2881,BPH2882
11	BPH3733--BPH3336	BPH3733	BPH3336	2	FALSE	115.831	0.004329	649	2	BPH3336,BPH3733
11	BPH3216--BPH3270	BPH3216	BPH3270	2	FALSE	9.95811	0.555556	567	2	BPH3216,BPH3270
11	BPH3389--BPH3460	BPH3389	BPH3460	0	FALSE	50.9954	0.428571	560	2	BPH3389,BPH3460
11	BPH2943--BPH2942	BPH2943	BPH2942	0	FALSE	3.36698	0.699134	636	2	BPH2942,BPH2943
11	BPH2704--BPH2705	BPH2704	BPH2705	0	FALSE	36.4124	0.0151515	700	2	BPH2704,BPH2705
11	BPH2807--BPH2808	BPH2807	BPH2808	0	FALSE	-6.67639	0.407867	688	2	BPH2807,BPH2808
11	BPH2852--BPH2857	BPH2852	BPH2857	1	FALSE	9.66952	0.484848	664	2	BPH2852,BPH2857
11	BPH2953--BPH2952	BPH2953	BPH2952	2	FALSE	-9.27368	0.177489	726	2	BPH2952,BPH2953
11	BPH3755--BPH3694	BPH3755	BPH3694	0	FALSE	30.1035	0.111111	500	2	BPH3694,BPH3755
11	BPH3596--BPH3628	BPH3596	BPH3628	20	FALSE	15.1389	0.329004	581	2	BPH3596,BPH3628
11	BPH3352--BPH3736	BPH3352	BPH3736	2	FALSE	13.9241	0.588745	737	2	BPH3352,BPH3736
12	BPH3260--BPH3262	BPH3260	BPH3262	10	FALSE	-35.1237	0.329004	511	6	BPH3208,BPH3250,BPH3220,BPH3260,BPH3306,BPH3262
12	BPH3202--BPH3757	BPH3202	BPH3757	68	FALSE	-70.2969	0.004329	481	24	BPH2787,BPH3704,BPH3702,BPH3666,BPH3636,BPH3692,BPH3668,BPH3710,BPH3706,BPH3757,BPH3658,BPH3672,BPH3648,BPH3650,BPH3652,BPH3694,BPH3755,BPH3640,BPH3688,BPH3662,BPH2869,BPH3670,BPH3638,BPH3202
12	BPH3547--BPH3511	BPH3547	BPH3511	54	FALSE	-67.5557	0.00793651	462	9	BPH2779,BPH3394,BPH2907,BPH3328,BPH3485,BPH3511,BPH3356,BPH3737,BPH3547
12	BPH3686--BPH3684	BPH3686	BPH3684	52	FALSE	-32.5228	0.0649351	504	8	BPH3643,BPH3700,BPH3674,BPH3753,BPH3682,BPH3686,BPH3660,BPH3684
12	BPH3216--BPH3270	BPH3216	BPH3270	2	FALSE	9.95811	0.555556	567	2	BPH3216,BPH3270
12	BPH2814--BPH2812	BPH2814	BPH2812	0	FALSE	-4.15163	0.937229	577	3	BPH2812,BPH2815,BPH2814
12	BPH3382--BPH3435	BPH3382	BPH3435	16	FALSE	-57.2537	0.0021645	417	5	BPH2710,BPH2780,BPH2896,BPH3382,BPH3435
12	BPH2976--BPH2979	BPH2976	BPH2979	1	FALSE	36.3145	0.2	410	5	BPH2977,BPH2979,BPH2978,BPH2976,BPH2980
12	BPH2990--BPH2989	BPH2990	BPH2989	0	FALSE	12.2099	0.0649351	543	3	BPH2989,BPH2990,BPH2991
12	BPH2819--BPH2820	BPH2819	BPH2820	2	FALSE	15.0066	0.24026	629	2	BPH2819,BPH2820
12	BPH3276--BPH3236	BPH3276	BPH3236	126	FALSE	36.0999	0.428571	523	4	BPH3236,BPH3258,BPH3316,BPH3276
12	BPH2800--BPH2718	BPH2800	BPH2718	47	FALSE	7.02371	0.490842	456	5	BPH2718,BPH2946,BPH2798,BPH2799,BPH2800
12	BPH2926--BPH2925	BPH2926	BPH2925	4	FALSE	106.565	0.0021645	583	5	BPH2922,BPH2923,BPH2924,BPH2926,BPH2925
12	BPH3401--BPH3741	BPH3401	BPH3741	6	FALSE	1.08155	0.699134	430	9	BPH3401,BPH3493,BPH3742,BPH3417,BPH3743,BPH3744,BPH3745,BPH3463,BPH3741
12	BPH2729--BPH2730	BPH2729	BPH2730	6	FALSE	116.568	4.11353e-05	731	2	BPH2729,BPH2730
12	BPH3226--BPH3292	BPH3226	BPH3292	5	FALSE	2.89786	0.792208	521	2	BPH3226,BPH3292
12	BPH3396--BPH3481	BPH3396	BPH3481	7	FALSE	-13.779	0.0666667	671	2	BPH3396,BPH3481
12	BPH3489--BPH3501	BPH3489	BPH3501	2	FALSE	9.97263	0.125541	690	2	BPH3489,BPH3501
12	BPH3479--BPH3477	BPH3479	BPH3477	16	FALSE	-3.12279	0.792208	736	2	BPH3477,BPH3479
12	BPH2831--BPH2833	BPH2831	BPH2833	0	FALSE	13.5635	0.0519481	545	3	BPH2831,BPH2832,BPH2833
12	BPH2887--BPH2888	BPH2887	BPH2888	0	FALSE	2.50728	0.914286	735	2	BPH2887,BPH2888
12	BPH2962--BPH2963	BPH2962	BPH2963	5	FALSE	0.683086	0.818182	596	3	BPH2962,BPH2963,BPH2964
12	BPH2754--BPH2755	BPH2754	BPH2755	0	FALSE	-2.77606	1	630	2	BPH2754,BPH2755
12	BPH3372--BPH3376	BPH3372	BPH3376	35	FALSE	39.0895	0.004329	421	4	BPH2726,BPH2727,BPH3376,BPH3372
12	BPH3734--BPH3337	BPH3734	BPH3337	3	FALSE	-3.64288	0.818182	532	2	BPH3337,BPH3734
12	BPH3368--BPH3348	BPH3368	BPH3348	65	TRUE	-56.3119	0.004329	442	3	BPH3348,BPH3735,BPH3368
12	BPH3403--BPH3457	BPH3403	BPH3457	26	FALSE	-51.8596	0.004329	444	10	BPH2947,BPH2948,BPH3439,BPH3453,BPH3457,BPH3431,BPH3469,BPH3403,BPH3413,BPH3499
12	BPH2974--BPH2973	BPH2974	BPH2973	0	FALSE	33.1289	0.0519481	768	3	BPH2973,BPH2975,BPH2974
12	BPH2705--BPH2704	BPH2705	BPH2704	0	TRUE	-36.4124	0.0151515	700	2	BPH2704,BPH2705
12	BPH2803--BPH2802	BPH2803	BPH2802	29	FALSE	12.719	0.393939	707	3	BPH2801,BPH2802,BPH2803
12	BPH3284--BPH3272	BPH3284	BPH3272	9	FALSE	-19.8051	0.246753	526	3	BPH3244,BPH3284,BPH3272
12	BPH3529--BPH3527	BPH3529	BPH3527	46	FALSE	31.413	0.0649351	439	4	BPH3523,BPH3527,BPH3529,BPH3739
12	BPH3340--BPH3338	BPH3340	BPH3338	6	FALSE	145.303	0.0285714	740	3	BPH2792,BPH3340,BPH3338
12	BPH2952--BPH2953	BPH2952	BPH2953	2	FALSE	9.27368	0.177489	726	2	BPH2952,BPH2953
12	BPH2872--BPH2873	BPH2872	BPH2873	0	FALSE	-12.0854	0.536797	646	2	BPH2872,BPH2873
12	BPH3696--BPH3632	BPH3696	BPH3632	2	FALSE	-17.3031	0.309524	517	2	BPH3632,BPH3696
12	BPH2891--BPH2890	BPH2891	BPH2890	0	FALSE	-16.8054	0.150794	659	2	BPH2890,BPH2891
12	BPH2841--BPH2840	BPH2841	BPH2840	0	FALSE	1.64172	0.484848	548	2	BPH2840,BPH2841
12	BPH2761--BPH2752	BPH2761	BPH2752	0	FALSE	43.1603	0.031746	750	2	BPH2752,BPH2761
12	BPH2877--BPH2876	BPH2877	BPH2876	4	FALSE	20.6942	0.699134	656	2	BPH2876,BPH2877
12	BPH2866--BPH2867	BPH2866	BPH2867	1	FALSE	-22.3157	0.24026	558	2	BPH2866,BPH2867
12	BPH3751--BPH2858	BPH3751	BPH2858	35	FALSE	64.6254	0.0021645	676	5	BPH2720,BPH2742,BPH2858,BPH3750,BPH3751
12	BPH2737--BPH2738	BPH2737	BPH2738	1	FALSE	-9.31894	0.0649351	557	2	BPH2737,BPH2738
12	BPH3535--BPH3752	BPH3535	BPH3752	0	FALSE	13.9253	0.132035	472	2	BPH3535,BPH3752
12	BPH3427--BPH3747	BPH3427	BPH3747	1	FALSE	7.72504	0.309524	692	2	BPH3427,BPH3747
12	BPH2864--BPH2863	BPH2864	BPH2863	0	FALSE	-1.65592	0.937229	755	2	BPH2863,BPH2864
12	BPH2987--BPH2988	BPH2987	BPH2988	0	FALSE	-15.2499	0.420635	770	2	BPH2987,BPH2988
12	BPH2857--BPH2852	BPH2857	BPH2852	1	FALSE	-9.66952	0.484848	664	2	BPH2852,BPH2857
12	BPH3746--BPH3423	BPH3746	BPH3423	0	FALSE	12.572	0.257143	601	3	BPH3423,BPH3434,BPH3746
12	BPH3548--BPH3524	BPH3548	BPH3524	0	FALSE	-39.9747	0.114286	757	2	BPH3524,BPH3548
12	BPH2959--BPH2961	BPH2959	BPH2961	0	FALSE	-11.8141	0.588745	643	3	BPH2959,BPH2960,BPH2961
12	BPH3352--BPH3736	BPH3352	BPH3736	2	FALSE	13.9241	0.588745	737	2	BPH3352,BPH3736
12	BPH2748--BPH2747	BPH2748	BPH2747	2	FALSE	-6.33616	0.662338	427	2	BPH2747,BPH2748
12	BPH2850--BPH2849	BPH2850	BPH2849	1	FALSE	-7.89025	0.662338	645	2	BPH2849,BPH2850
12	BPH3362--BPH3366	BPH3362	BPH3366	18	FALSE	60.6017	0.0021645	415	2	BPH3362,BPH3366
12	BPH2883--BPH2884	BPH2883	BPH2884	0	FALSE	0.76274	0.84127	634	2	BPH2883,BPH2884
12	BPH3612--BPH3602	BPH3612	BPH3602	11	FALSE	7.65837	0.309524	681	2	BPH3612,BPH3602
12	BPH3274--BPH3282	BPH3274	BPH3282	1	FALSE	85.2295	0.015873	648	2	BPH3274,BPH3282
12	BPH2897--BPH2898	BPH2897	BPH2898	0	FALSE	2.0829	0.937229	772	2	BPH2897,BPH2898
12	BPH2708--BPH2709	BPH2708	BPH2709	0	FALSE	7.26096	0.420635	591	2	BPH2708,BPH2709
12	BPH2860--BPH2784	BPH2860	BPH2784	147	TRUE	-114.455	0.00952381	661	2	BPH2784,BPH2860
12	BPH2777--BPH2778	BPH2777	BPH2778	0	FALSE	-7.81792	0.0930736	759	2	BPH2777,BPH2778
12	BPH3748--BPH3433	BPH3748	BPH3433	0	FALSE	26.3053	0.00952381	438	2	BPH3433,BPH3748
12	BPH3462--BPH3459	BPH3462	BPH3459	1	FALSE	27.469	0.171429	628	2	BPH3459,BPH3462
12	BPH2783--BPH2847	BPH2783	BPH2847	33	FALSE	6.23793	0.47619	684	4	BPH2783,BPH2842,BPH2843,BPH2847
12	BPH3588--BPH3584	BPH3588	BPH3584	9	FALSE	-6.1861	0.484848	705	2	BPH3584,BPH3588
12	BPH3294--BPH3246	BPH3294	BPH3246	6	FALSE	-23.2762	0.0411255	580	2	BPH3246,BPH3294
12	BPH2862--BPH2861	BPH2862	BPH2861	2	FALSE	-23.7964	0.428571	765	2	BPH2861,BPH2862
12	BPH3482--BPH3508	BPH3482	BPH3508	8	FALSE	19.4178	0.114286	600	2	BPH3482,BPH3508
12	BPH3738--BPH3381	BPH3738	BPH3381	1	FALSE	6.95866	0.930736	725	2	BPH3381,BPH3738
12	BPH2881--BPH2882	BPH2881	BPH2882	12	FALSE	1.33085	0.914286	615	2	BPH2881,BPH2882
12	BPH3346--BPH3545	BPH3346	BPH3545	61	FALSE	-36.4419	0.0411255	473	3	BPH3346,BPH3443,BPH3545
12	BPH3590--BPH3568	BPH3590	BPH3568	37	FALSE	46.2301	0.017316	695	2	BPH3590,BPH3568
12	BPH3733--BPH3336	BPH3733	BPH3336	2	FALSE	115.831	0.004329	649	2	BPH3336,BPH3733
12	BPH3628--BPH3596	BPH3628	BPH3596	21	FALSE	-15.1389	0.329004	581	2	BPH3596,BPH3628
12	BPH2763--BPH2823	BPH2763	BPH2823	161	FALSE	11.6822	0.00865801	657	3	BPH2763,BPH2764,BPH2823
12	BPH3304--BPH3268	BPH3304	BPH3268	2	FALSE	18.7354	0.792208	662	2	BPH3268,BPH3304
12	BPH2942--BPH2943	BPH2942	BPH2943	0	FALSE	-3.36698	0.699134	636	2	BPH2942,BPH2943
12	BPH2966--BPH2965	BPH2966	BPH2965	0	FALSE	-9.15242	0.24026	531	2	BPH2965,BPH2966
12	BPH3749--BPH3437	BPH3749	BPH3437	4	FALSE	-2.2445	0.699134	693	2	BPH3437,BPH3749
12	BPH2807--BPH2808	BPH2807	BPH2808	0	FALSE	-6.67639	0.407867	688	2	BPH2807,BPH2808
12	BPH2713--BPH2714	BPH2713	BPH2714	2	FALSE	17.3353	0.177489	716	2	BPH2713,BPH2714
12	BPH2771--BPH2770	BPH2771	BPH2770	2	FALSE	-3.1817	0.937229	739	2	BPH2770,BPH2771
12	BPH2825--BPH2824	BPH2825	BPH2824	0	FALSE	1.84537	0.937229	414	2	BPH2824,BPH2825
12	BPH2750--BPH2751	BPH2750	BPH2751	2	FALSE	-12.9316	0.588745	764	2	BPH2750,BPH2751
12	BPH3460--BPH3389	BPH3460	BPH3389	1	FALSE	-50.9954	0.428571	560	2	BPH3389,BPH3460
13	BPH3686--BPH3670	BPH3686	BPH3670	60	FALSE	60.7938	0.0519481	480	32	BPH2787,BPH3704,BPH3702,BPH3666,BPH3636,BPH3692,BPH3668,BPH3710,BPH3706,BPH3757,BPH3658,BPH3672,BPH3648,BPH3650,BPH3652,BPH3694,BPH3755,BPH3640,BPH3688,BPH3662,BPH2869,BPH3670,BPH3638,BPH3202,BPH3643,BPH3700,BPH3674,BPH3753,BPH3682,BPH3686,BPH3660,BPH3684
13	BPH3745--BPH3744	BPH3745	BPH3744	1	FALSE	2.5682	0.699134	435	4	BPH3417,BPH3743,BPH3744,BPH3745
13	BPH3439--BPH3457	BPH3439	BPH3457	15	FALSE	3.59932	0.662338	449	3	BPH3439,BPH3453,BPH3457
13	BPH3493--BPH3742	BPH3493	BPH3742	0	FALSE	56.0616	0.004329	432	2	BPH3493,BPH3742
13	BPH2923--BPH2922	BPH2923	BPH2922	2	FALSE	13.6876	0.125541	586	2	BPH2922,BPH2923
13	BPH2959--BPH2961	BPH2959	BPH2961	0	FALSE	-11.8141	0.588745	643	3	BPH2959,BPH2960,BPH2961
13	BPH3511--BPH3485	BPH3511	BPH3485	11	FALSE	-25.3332	0.150794	468	2	BPH3485,BPH3511
13	BPH2729--BPH2730	BPH2729	BPH2730	6	FALSE	116.568	4.11353e-05	731	2	BPH2729,BPH2730
13	BPH3527--BPH3739	BPH3527	BPH3739	47	FALSE	-36.2039	0.025974	439	4	BPH3523,BPH3527,BPH3529,BPH3739
13	BPH3735--BPH3348	BPH3735	BPH3348	0	FALSE	-5.82626	0.177489	443	2	BPH3348,BPH3735
13	BPH3362--BPH3382	BPH3362	BPH3382	63	FALSE	55.335	0.0021645	404	21	BPH2710,BPH2780,BPH2896,BPH3382,BPH3435,BPH2726,BPH2727,BPH3376,BPH3372,BPH3362,BPH3366,BPH2824,BPH2825,BPH2781,BPH2982,BPH2981,BPH2977,BPH2979,BPH2978,BPH2976,BPH2980
13	BPH3535--BPH3752	BPH3535	BPH3752	0	FALSE	13.9253	0.132035	472	2	BPH3535,BPH3752
13	BPH2813--BPH2814	BPH2813	BPH2814	0	FALSE	4.26774	0.662338	576	4	BPH2812,BPH2815,BPH2814,BPH2813
13	BPH3747--BPH3427	BPH3747	BPH3427	2	FALSE	-7.72504	0.309524	692	2	BPH3427,BPH3747
13	BPH3381--BPH3738	BPH3381	BPH3738	2	FALSE	-6.95866	0.930736	725	2	BPH3381,BPH3738
13	BPH3250--BPH3260	BPH3250	BPH3260	1	FALSE	-7.32114	0.930736	512	5	BPH3208,BPH3250,BPH3220,BPH3260,BPH3306
13	BPH2833--BPH2831	BPH2833	BPH2831	0	FALSE	-13.5635	0.0519481	545	3	BPH2831,BPH2832,BPH2833
13	BPH2863--BPH2864	BPH2863	BPH2864	0	FALSE	1.65592	0.937229	755	2	BPH2863,BPH2864
13	BPH2858--BPH2720	BPH2858	BPH2720	38	TRUE	-79.6552	0.0021645	677	3	BPH2720,BPH2742,BPH2858
13	BPH3304--BPH3268	BPH3304	BPH3268	2	FALSE	18.7354	0.792208	662	2	BPH3268,BPH3304
13	BPH2953--BPH2952	BPH2953	BPH2952	2	FALSE	-9.27368	0.177489	726	2	BPH2952,BPH2953
13	BPH2771--BPH2770	BPH2771	BPH2770	2	FALSE	-3.1817	0.937229	739	2	BPH2770,BPH2771
13	BPH2700--BPH2876	BPH2700	BPH2876	139	FALSE	37.4043	0.179654	655	3	BPH2700,BPH2876,BPH2877
13	BPH3226--BPH3292	BPH3226	BPH3292	5	FALSE	2.89786	0.792208	521	2	BPH3226,BPH3292
13	BPH3258--BPH3236	BPH3258	BPH3236	5	FALSE	9.1088	1	525	2	BPH3236,BPH3258
13	BPH2783--BPH2847	BPH2783	BPH2847	33	FALSE	6.23793	0.47619	684	4	BPH2783,BPH2842,BPH2843,BPH2847
13	BPH3389--BPH3460	BPH3389	BPH3460	0	FALSE	50.9954	0.428571	560	2	BPH3389,BPH3460
13	BPH3696--BPH3632	BPH3696	BPH3632	2	FALSE	-17.3031	0.309524	517	2	BPH3632,BPH3696
13	BPH3244--BPH3284	BPH3244	BPH3284	5	FALSE	-3.35133	0.792208	527	2	BPH3244,BPH3284
13	BPH2988--BPH2987	BPH2988	BPH2987	0	FALSE	15.2499	0.420635	770	2	BPH2987,BPH2988
13	BPH2946--BPH2798	BPH2946	BPH2798	57	TRUE	-32.1012	0.034965	456	5	BPH2718,BPH2946,BPH2798,BPH2799,BPH2800
13	BPH2737--BPH2738	BPH2737	BPH2738	1	FALSE	-9.31894	0.0649351	557	2	BPH2737,BPH2738
13	BPH3337--BPH3734	BPH3337	BPH3734	4	FALSE	3.64288	0.818182	532	2	BPH3337,BPH3734
13	BPH2857--BPH2852	BPH2857	BPH2852	1	FALSE	-9.66952	0.484848	664	2	BPH2852,BPH2857
13	BPH2948--BPH2947	BPH2948	BPH2947	0	FALSE	23.761	0.179654	448	2	BPH2947,BPH2948
13	BPH2808--BPH2807	BPH2808	BPH2807	0	FALSE	6.67639	0.407867	688	2	BPH2807,BPH2808
13	BPH2803--BPH2801	BPH2803	BPH2801	24	FALSE	-3.66723	0.572761	707	3	BPH2801,BPH2802,BPH2803
13	BPH2823--BPH2763	BPH2823	BPH2763	157	FALSE	-11.6822	0.00865801	657	3	BPH2763,BPH2764,BPH2823
13	BPH3499--BPH3413	BPH3499	BPH3413	31	FALSE	68.794	0.0021645	451	3	BPH3403,BPH3413,BPH3499
13	BPH3548--BPH3524	BPH3548	BPH3524	0	FALSE	-39.9747	0.114286	757	2	BPH3524,BPH3548
13	BPH2861--BPH2862	BPH2861	BPH2862	1	FALSE	23.7964	0.428571	765	2	BPH2861,BPH2862
13	BPH3459--BPH3462	BPH3459	BPH3462	2	FALSE	-27.469	0.171429	628	2	BPH3459,BPH3462
13	BPH2820--BPH2819	BPH2820	BPH2819	2	FALSE	-15.0066	0.24026	629	2	BPH2819,BPH2820
13	BPH3433--BPH3748	BPH3433	BPH3748	0	FALSE	-26.3053	0.00952381	438	2	BPH3433,BPH3748
13	BPH3423--BPH3434	BPH3423	BPH3434	0	FALSE	-41.9255	0.015873	601	3	BPH3423,BPH3434,BPH3746
13	BPH2882--BPH2881	BPH2882	BPH2881	13	FALSE	-1.33085	0.914286	615	2	BPH2881,BPH2882
13	BPH2872--BPH2873	BPH2872	BPH2873	0	FALSE	-12.0854	0.536797	646	2	BPH2872,BPH2873
13	BPH2973--BPH2974	BPH2973	BPH2974	0	FALSE	-33.1289	0.0519481	768	3	BPH2973,BPH2975,BPH2974
13	BPH3352--BPH3736	BPH3352	BPH3736	2	FALSE	13.9241	0.588745	737	2	BPH3352,BPH3736
13	BPH2884--BPH2883	BPH2884	BPH2883	0	FALSE	-0.76274	0.84127	634	2	BPH2883,BPH2884
13	BPH3751--BPH3750	BPH3751	BPH3750	1	FALSE	113.455	0.00865801	679	2	BPH3750,BPH3751
13	BPH3733--BPH3336	BPH3733	BPH3336	2	FALSE	115.831	0.004329	649	2	BPH3336,BPH3733
13	BPH3749--BPH3437	BPH3749	BPH3437	4	FALSE	-2.2445	0.699134	693	2	BPH3437,BPH3749
13	BPH2991--BPH2989	BPH2991	BPH2989	0	FALSE	10.4447	0.179654	543	3	BPH2989,BPH2990,BPH2991
13	BPH2860--BPH2784	BPH2860	BPH2784	147	TRUE	-114.455	0.00952381	661	2	BPH2784,BPH2860
13	BPH2890--BPH2891	BPH2890	BPH2891	0	FALSE	16.8054	0.150794	659	2	BPH2890,BPH2891
13	BPH3737--BPH3356	BPH3737	BPH3356	0	FALSE	-44.7685	0.588745	469	2	BPH3356,BPH3737
13	BPH2704--BPH2705	BPH2704	BPH2705	0	FALSE	36.4124	0.0151515	700	2	BPH2704,BPH2705
13	BPH3501--BPH3489	BPH3501	BPH3489	3	FALSE	-9.97263	0.125541	690	2	BPH3489,BPH3501
13	BPH3596--BPH3628	BPH3596	BPH3628	20	FALSE	15.1389	0.329004	581	2	BPH3596,BPH3628
13	BPH2888--BPH2887	BPH2888	BPH2887	0	FALSE	-2.50728	0.914286	735	2	BPH2887,BPH2888
13	BPH2713--BPH2714	BPH2713	BPH2714	2	FALSE	17.3353	0.177489	716	2	BPH2713,BPH2714
13	BPH3443--BPH3545	BPH3443	BPH3545	44	FALSE	-3.76094	1	473	3	BPH3346,BPH3443,BPH3545
13	BPH2752--BPH2761	BPH2752	BPH2761	0	TRUE	-43.1603	0.031746	750	2	BPH2752,BPH2761
13	BPH3590--BPH3568	BPH3590	BPH3568	37	FALSE	46.2301	0.017316	695	2	BPH3590,BPH3568
13	BPH3246--BPH3294	BPH3246	BPH3294	8	FALSE	23.2762	0.0411255	580	2	BPH3246,BPH3294
13	BPH2898--BPH2897	BPH2898	BPH2897	0	FALSE	-2.0829	0.937229	772	2	BPH2897,BPH2898
13	BPH2963--BPH2962	BPH2963	BPH2962	5	FALSE	-0.683086	0.818182	596	3	BPH2962,BPH2963,BPH2964
13	BPH2750--BPH2751	BPH2750	BPH2751	2	FALSE	-12.9316	0.588745	764	2	BPH2750,BPH2751
13	BPH2755--BPH2754	BPH2755	BPH2754	0	FALSE	2.77606	1	630	2	BPH2754,BPH2755
13	BPH3612--BPH3602	BPH3612	BPH3602	11	FALSE	7.65837	0.309524	681	2	BPH3612,BPH3602
13	BPH2943--BPH2942	BPH2943	BPH2942	0	FALSE	3.36698	0.699134	636	2	BPH2942,BPH2943
13	BPH2747--BPH2748	BPH2747	BPH2748	1	FALSE	6.33616	0.662338	427	2	BPH2747,BPH2748
13	BPH3340--BPH3338	BPH3340	BPH3338	6	FALSE	145.303	0.0285714	740	3	BPH2792,BPH3340,BPH3338
13	BPH2709--BPH2708	BPH2709	BPH2708	1	FALSE	-7.26096	0.420635	591	2	BPH2708,BPH2709
13	BPH3477--BPH3479	BPH3477	BPH3479	15	FALSE	3.12279	0.792208	736	2	BPH3477,BPH3479
13	BPH2841--BPH2840	BPH2841	BPH2840	0	FALSE	1.64172	0.484848	548	2	BPH2840,BPH2841
13	BPH3584--BPH3588	BPH3584	BPH3588	9	FALSE	6.1861	0.484848	705	2	BPH3584,BPH3588
13	BPH3482--BPH3508	BPH3482	BPH3508	8	FALSE	19.4178	0.114286	600	2	BPH3482,BPH3508
13	BPH2966--BPH2965	BPH2966	BPH2965	0	FALSE	-9.15242	0.24026	531	2	BPH2965,BPH2966
13	BPH2778--BPH2777	BPH2778	BPH2777	0	FALSE	7.81792	0.0930736	759	2	BPH2777,BPH2778
13	BPH2867--BPH2866	BPH2867	BPH2866	2	FALSE	22.3157	0.24026	558	2	BPH2866,BPH2867
13	BPH2849--BPH2850	BPH2849	BPH2850	1	FALSE	7.89025	0.662338	645	2	BPH2849,BPH2850
13	BPH3216--BPH3270	BPH3216	BPH3270	2	FALSE	9.95811	0.555556	567	2	BPH3216,BPH3270
13	BPH3282--BPH3274	BPH3282	BPH3274	3	TRUE	-85.2295	0.015873	648	2	BPH3274,BPH3282
13	BPH2779--BPH3394	BPH2779	BPH3394	38	FALSE	1.75762	0.662338	465	2	BPH2779,BPH3394
13	BPH3396--BPH3481	BPH3396	BPH3481	7	FALSE	-13.779	0.0666667	671	2	BPH3396,BPH3481
14	BPH2975--BPH2973	BPH2975	BPH2973	0	FALSE	26.6955	0.179654	769	2	BPH2973,BPH2975
14	BPH3545--BPH3403	BPH3545	BPH3403	77	FALSE	49.9797	0.00865801	399	77	BPH2718,BPH2946,BPH2798,BPH2799,BPH2800,BPH3465,BPH3370,BPH2779,BPH3394,BPH2907,BPH3328,BPH3485,BPH3511,BPH3356,BPH3737,BPH3547,BPH3360,BPH3535,BPH3752,BPH3346,BPH3443,BPH3545,BPH3473,BPH3415,BPH2947,BPH2948,BPH3439,BPH3453,BPH3457,BPH3431,BPH3469,BPH3403,BPH3413,BPH3499,BPH3348,BPH3735,BPH3368,BPH2747,BPH2748,BPH3401,BPH3493,BPH3742,BPH3417,BPH3743,BPH3744,BPH3745,BPH3463,BPH3741,BPH3433,BPH3748…
14	BPH3668--BPH3710	BPH3668	BPH3710	2	FALSE	-25.3692	0.179654	495	2	BPH3668,BPH3710
14	BPH3481--BPH3396	BPH3481	BPH3396	7	FALSE	13.779	0.0666667	671	2	BPH3396,BPH3481
14	BPH3208--BPH3260	BPH3208	BPH3260	3	FALSE	16.7286	0.393939	512	5	BPH3208,BPH3250,BPH3220,BPH3260,BPH3306
14	BPH3284--BPH3244	BPH3284	BPH3244	5	FALSE	3.35133	0.792208	527	2	BPH3244,BPH3284
14	BPH2700--BPH2876	BPH2700	BPH2876	139	FALSE	37.4043	0.179654	655	3	BPH2700,BPH2876,BPH2877
14	BPH2770--BPH2771	BPH2770	BPH2771	2	FALSE	3.1817	0.937229	739	2	BPH2770,BPH2771
14	BPH3660--BPH3684	BPH3660	BPH3684	46	FALSE	-2.24833	0.818182	510	2	BPH3660,BPH3684
14	BPH3700--BPH3643	BPH3700	BPH3643	24	TRUE	-63.9353	0.004329	507	2	BPH3643,BPH3700
14	BPH3696--BPH3632	BPH3696	BPH3632	2	FALSE	-17.3031	0.309524	517	2	BPH3632,BPH3696
14	BPH3648--BPH3650	BPH3648	BPH3650	4	FALSE	49.1981	0.0380952	499	2	BPH3648,BPH3650
14	BPH3746--BPH3423	BPH3746	BPH3423	0	FALSE	12.572	0.257143	601	3	BPH3423,BPH3434,BPH3746
14	BPH3226--BPH3204	BPH3226	BPH3204	4	FALSE	-30.7573	0.730159	520	3	BPH3204,BPH3226,BPH3292
14	BPH2833--BPH2832	BPH2833	BPH2832	0	FALSE	-14.6894	0.025974	546	2	BPH2832,BPH2833
14	BPH3686--BPH3682	BPH3686	BPH3682	27	FALSE	59.3991	0.00865801	509	2	BPH3682,BPH3686
14	BPH3501--BPH3489	BPH3501	BPH3489	3	FALSE	-9.97263	0.125541	690	2	BPH3489,BPH3501
14	BPH2777--BPH2778	BPH2777	BPH2778	0	FALSE	-7.81792	0.0930736	759	2	BPH2777,BPH2778
14	BPH2869--BPH3670	BPH2869	BPH3670	47	FALSE	12.9989	0.690476	503	2	BPH2869,BPH3670
14	BPH2962--BPH2963	BPH2962	BPH2963	5	FALSE	0.683086	0.818182	596	3	BPH2962,BPH2963,BPH2964
14	BPH3666--BPH3702	BPH3666	BPH3702	13	FALSE	4.30441	0.818182	486	4	BPH2787,BPH3704,BPH3702,BPH3666
14	BPH2841--BPH2840	BPH2841	BPH2840	0	FALSE	1.64172	0.484848	548	2	BPH2840,BPH2841
14	BPH2808--BPH2807	BPH2808	BPH2807	0	FALSE	6.67639	0.407867	688	2	BPH2807,BPH2808
14	BPH2882--BPH2881	BPH2882	BPH2881	13	FALSE	-1.33085	0.914286	615	2	BPH2881,BPH2882
14	BPH2751--BPH2750	BPH2751	BPH2750	1	FALSE	12.9316	0.588745	764	2	BPH2750,BPH2751
14	BPH2858--BPH3750	BPH2858	BPH3750	35	FALSE	48.8298	0.393939	676	5	BPH2720,BPH2742,BPH2858,BPH3750,BPH3751
14	BPH3316--BPH3258	BPH3316	BPH3258	98	FALSE	36.7196	0.393939	524	3	BPH3236,BPH3258,BPH3316
14	BPH2862--BPH2861	BPH2862	BPH2861	2	FALSE	-23.7964	0.428571	765	2	BPH2861,BPH2862
14	BPH2852--BPH2857	BPH2852	BPH2857	1	FALSE	9.66952	0.484848	664	2	BPH2852,BPH2857
14	BPH3734--BPH3337	BPH3734	BPH3337	3	FALSE	-3.64288	0.818182	532	2	BPH3337,BPH3734
14	BPH2926--BPH2922	BPH2926	BPH2922	5	FALSE	19.7389	0.004329	584	4	BPH2922,BPH2923,BPH2924,BPH2926
14	BPH3268--BPH3304	BPH3268	BPH3304	2	FALSE	-18.7354	0.792208	662	2	BPH3268,BPH3304
14	BPH3340--BPH3338	BPH3340	BPH3338	6	FALSE	145.303	0.0285714	740	3	BPH2792,BPH3340,BPH3338
14	BPH3733--BPH3336	BPH3733	BPH3336	2	FALSE	115.831	0.004329	649	2	BPH3336,BPH3733
14	BPH3749--BPH3437	BPH3749	BPH3437	4	FALSE	-2.2445	0.699134	693	2	BPH3437,BPH3749
14	BPH3692--BPH3636	BPH3692	BPH3636	4	FALSE	0.809313	1	493	2	BPH3636,BPH3692
14	BPH2866--BPH2867	BPH2866	BPH2867	1	FALSE	-22.3157	0.24026	558	2	BPH2866,BPH2867
14	BPH2737--BPH2738	BPH2737	BPH2738	1	FALSE	-9.31894	0.0649351	557	2	BPH2737,BPH2738
14	BPH2897--BPH2898	BPH2897	BPH2898	0	FALSE	2.0829	0.937229	772	2	BPH2897,BPH2898
14	BPH2991--BPH2990	BPH2991	BPH2990	0	FALSE	-1.76518	0.588745	544	2	BPH2990,BPH2991
14	BPH2842--BPH2843	BPH2842	BPH2843	0	FALSE	7.19808	0.24026	686	2	BPH2842,BPH2843
14	BPH3246--BPH3294	BPH3246	BPH3294	8	FALSE	23.2762	0.0411255	580	2	BPH3246,BPH3294
14	BPH3628--BPH3596	BPH3628	BPH3596	21	FALSE	-15.1389	0.329004	581	2	BPH3596,BPH3628
14	BPH2755--BPH2754	BPH2755	BPH2754	0	FALSE	2.77606	1	630	2	BPH2754,BPH2755
14	BPH2966--BPH2965	BPH2966	BPH2965	0	FALSE	-9.15242	0.24026	531	2	BPH2965,BPH2966
14	BPH2812--BPH2815	BPH2812	BPH2815	0	FALSE	-2.00875	0.937229	578	2	BPH2812,BPH2815
14	BPH2988--BPH2987	BPH2988	BPH2987	0	FALSE	15.2499	0.420635	770	2	BPH2987,BPH2988
14	BPH3736--BPH3352	BPH3736	BPH3352	1	FALSE	-13.9241	0.588745	737	2	BPH3352,BPH3736
14	BPH2803--BPH2801	BPH2803	BPH2801	24	FALSE	-3.66723	0.572761	707	3	BPH2801,BPH2802,BPH2803
14	BPH3460--BPH3389	BPH3460	BPH3389	1	FALSE	-50.9954	0.428571	560	2	BPH3389,BPH3460
14	BPH3688--BPH3640	BPH3688	BPH3640	22	FALSE	0.380341	1	501	2	BPH3640,BPH3688
14	BPH2953--BPH2952	BPH2953	BPH2952	2	FALSE	-9.27368	0.177489	726	2	BPH2952,BPH2953
14	BPH3462--BPH3459	BPH3462	BPH3459	1	FALSE	27.469	0.171429	628	2	BPH3459,BPH3462
14	BPH3270--BPH3216	BPH3270	BPH3216	2	FALSE	-9.95811	0.555556	567	2	BPH3216,BPH3270
14	BPH3602--BPH3612	BPH3602	BPH3612	10	FALSE	-7.65837	0.309524	681	2	BPH3612,BPH3602
14	BPH2708--BPH2709	BPH2708	BPH2709	0	FALSE	7.26096	0.420635	591	2	BPH2708,BPH2709
14	BPH2883--BPH2884	BPH2883	BPH2884	0	FALSE	0.76274	0.84127	634	2	BPH2883,BPH2884
14	BPH2873--BPH2872	BPH2873	BPH2872	0	FALSE	12.0854	0.536797	646	2	BPH2872,BPH2873
14	BPH2887--BPH2888	BPH2887	BPH2888	0	FALSE	2.50728	0.914286	735	2	BPH2887,BPH2888
14	BPH3548--BPH3524	BPH3548	BPH3524	0	FALSE	-39.9747	0.114286	757	2	BPH3524,BPH3548
14	BPH2864--BPH2863	BPH2864	BPH2863	0	FALSE	-1.65592	0.937229	755	2	BPH2863,BPH2864
14	BPH2959--BPH2960	BPH2959	BPH2960	0	FALSE	-12.3847	0.662338	643	3	BPH2959,BPH2960,BPH2961
14	BPH2819--BPH2820	BPH2819	BPH2820	2	FALSE	15.0066	0.24026	629	2	BPH2819,BPH2820
14	BPH2784--BPH2860	BPH2784	BPH2860	134	FALSE	114.455	0.00952381	661	2	BPH2784,BPH2860
14	BPH2705--BPH2704	BPH2705	BPH2704	0	TRUE	-36.4124	0.0151515	700	2	BPH2704,BPH2705
14	BPH3588--BPH3584	BPH3588	BPH3584	9	FALSE	-6.1861	0.484848	705	2	BPH3584,BPH3588
14	BPH2761--BPH2752	BPH2761	BPH2752	0	FALSE	43.1603	0.031746	750	2	BPH2752,BPH2761
14	BPH3755--BPH3694	BPH3755	BPH3694	0	FALSE	30.1035	0.111111	500	2	BPH3694,BPH3755
14	BPH2943--BPH2942	BPH2943	BPH2942	0	FALSE	3.36698	0.699134	636	2	BPH2942,BPH2943
14	BPH3757--BPH3706	BPH3757	BPH3706	1	FALSE	52.1181	0.004329	496	2	BPH3706,BPH3757
14	BPH3477--BPH3479	BPH3477	BPH3479	15	FALSE	3.12279	0.792208	736	2	BPH3477,BPH3479
14	BPH2728--BPH2729	BPH2728	BPH2729	5	TRUE	-109.969	4.11353e-05	730	3	BPH2728,BPH2729,BPH2730
14	BPH2713--BPH2714	BPH2713	BPH2714	2	FALSE	17.3353	0.177489	716	2	BPH2713,BPH2714
14	BPH3674--BPH3753	BPH3674	BPH3753	1	FALSE	5.3814	1	508	2	BPH3674,BPH3753
14	BPH2763--BPH2823	BPH2763	BPH2823	161	FALSE	11.6822	0.00865801	657	3	BPH2763,BPH2764,BPH2823
14	BPH3590--BPH3568	BPH3590	BPH3568	37	FALSE	46.2301	0.017316	695	2	BPH3590,BPH3568
14	BPH2850--BPH2849	BPH2850	BPH2849	1	FALSE	-7.89025	0.662338	645	2	BPH2849,BPH2850
14	BPH3381--BPH3738	BPH3381	BPH3738	2	FALSE	-6.95866	0.930736	725	2	BPH3381,BPH3738
14	BPH3427--BPH3747	BPH3427	BPH3747	1	FALSE	7.72504	0.309524	692	2	BPH3427,BPH3747
14	BPH3508--BPH3482	BPH3508	BPH3482	8	FALSE	-19.4178	0.114286	600	2	BPH3482,BPH3508
14	BPH3282--BPH3274	BPH3282	BPH3274	3	TRUE	-85.2295	0.015873	648	2	BPH3274,BPH3282
14	BPH2890--BPH2891	BPH2890	BPH2891	0	FALSE	16.8054	0.150794	659	2	BPH2890,BPH2891
15	BPH3316--BPH3276	BPH3316	BPH3276	89	FALSE	9.72843	1	523	4	BPH3236,BPH3258,BPH3316,BPH3276
15	BPH3262--BPH3692	BPH3262	BPH3692	61	FALSE	10.0902	0.662338	479	38	BPH2787,BPH3704,BPH3702,BPH3666,BPH3636,BPH3692,BPH3668,BPH3710,BPH3706,BPH3757,BPH3658,BPH3672,BPH3648,BPH3650,BPH3652,BPH3694,BPH3755,BPH3640,BPH3688,BPH3662,BPH2869,BPH3670,BPH3638,BPH3202,BPH3643,BPH3700,BPH3674,BPH3753,BPH3682,BPH3686,BPH3660,BPH3684,BPH3208,BPH3250,BPH3220,BPH3260,BPH3306,BPH3262
15	BPH3748--BPH3401	BPH3748	BPH3401	22	FALSE	60.4885	0.0021645	429	11	BPH3401,BPH3493,BPH3742,BPH3417,BPH3743,BPH3744,BPH3745,BPH3463,BPH3741,BPH3433,BPH3748
15	BPH2973--BPH2974	BPH2973	BPH2974	0	FALSE	-33.1289	0.0519481	768	3	BPH2973,BPH2975,BPH2974
15	BPH3439--BPH3453	BPH3439	BPH3453	10	FALSE	32.7318	0.031746	449	3	BPH3439,BPH3453,BPH3457
15	BPH3372--BPH3382	BPH3372	BPH3382	38	FALSE	61.1815	0.0021645	416	9	BPH2710,BPH2780,BPH2896,BPH3382,BPH3435,BPH2726,BPH2727,BPH3376,BPH3372
15	BPH3413--BPH3403	BPH3413	BPH3403	5	FALSE	-2.20539	1	452	2	BPH3403,BPH3413
15	BPH3511--BPH3547	BPH3511	BPH3547	48	FALSE	67.5557	0.00793651	462	9	BPH2779,BPH3394,BPH2907,BPH3328,BPH3485,BPH3511,BPH3356,BPH3737,BPH3547
15	BPH3596--BPH3628	BPH3596	BPH3628	20	FALSE	15.1389	0.329004	581	2	BPH3596,BPH3628
15	BPH2801--BPH2802	BPH2801	BPH2802	9	FALSE	16.3863	0.141858	708	2	BPH2801,BPH2802
15	BPH2704--BPH2705	BPH2704	BPH2705	0	FALSE	36.4124	0.0151515	700	2	BPH2704,BPH2705
15	BPH3437--BPH3749	BPH3437	BPH3749	4	FALSE	2.2445	0.699134	693	2	BPH3437,BPH3749
15	BPH3427--BPH3747	BPH3427	BPH3747	1	FALSE	7.72504	0.309524	692	2	BPH3427,BPH3747
15	BPH2979--BPH2981	BPH2979	BPH2981	12	FALSE	12.4397	1	409	6	BPH2981,BPH2977,BPH2979,BPH2978,BPH2976,BPH2980
15	BPH3204--BPH3292	BPH3204	BPH3292	7	FALSE	33.6551	0.609524	520	3	BPH3204,BPH3226,BPH3292
15	BPH2814--BPH2815	BPH2814	BPH2815	0	FALSE	-6.16038	0.484848	577	3	BPH2812,BPH2815,BPH2814
15	BPH3368--BPH3735	BPH3368	BPH3735	62	FALSE	-50.4856	0.0021645	442	3	BPH3348,BPH3735,BPH3368
15	BPH3696--BPH3632	BPH3696	BPH3632	2	FALSE	-17.3031	0.309524	517	2	BPH3632,BPH3696
15	BPH2946--BPH2798	BPH2946	BPH2798	57	TRUE	-32.1012	0.034965	456	5	BPH2718,BPH2946,BPH2798,BPH2799,BPH2800
15	BPH2887--BPH2888	BPH2887	BPH2888	0	FALSE	2.50728	0.914286	735	2	BPH2887,BPH2888
15	BPH3366--BPH3362	BPH3366	BPH3362	17	TRUE	-60.6017	0.0021645	415	2	BPH3362,BPH3366
15	BPH3527--BPH3523	BPH3527	BPH3523	15	FALSE	19.575	0.246753	440	2	BPH3523,BPH3527
15	BPH2850--BPH2849	BPH2850	BPH2849	1	FALSE	-7.89025	0.662338	645	2	BPH2849,BPH2850
15	BPH2858--BPH2720	BPH2858	BPH2720	38	TRUE	-79.6552	0.0021645	677	3	BPH2720,BPH2742,BPH2858
15	BPH2943--BPH2942	BPH2943	BPH2942	0	FALSE	3.36698	0.699134	636	2	BPH2942,BPH2943
15	BPH2965--BPH2966	BPH2965	BPH2966	0	FALSE	9.15242	0.24026	531	2	BPH2965,BPH2966
15	BPH2884--BPH2883	BPH2884	BPH2883	0	FALSE	-0.76274	0.84127	634	2	BPH2883,BPH2884
15	BPH2866--BPH2867	BPH2866	BPH2867	1	FALSE	-22.3157	0.24026	558	2	BPH2866,BPH2867
15	BPH2847--BPH2783	BPH2847	BPH2783	42	FALSE	-6.23793	0.47619	684	4	BPH2783,BPH2842,BPH2843,BPH2847
15	BPH2890--BPH2891	BPH2890	BPH2891	0	FALSE	16.8054	0.150794	659	2	BPH2890,BPH2891
15	BPH2952--BPH2953	BPH2952	BPH2953	2	FALSE	9.27368	0.177489	726	2	BPH2952,BPH2953
15	BPH2823--BPH2763	BPH2823	BPH2763	157	FALSE	-11.6822	0.00865801	657	3	BPH2763,BPH2764,BPH2823
15	BPH2923--BPH2922	BPH2923	BPH2922	2	FALSE	13.6876	0.125541	586	2	BPH2922,BPH2923
15	BPH2898--BPH2897	BPH2898	BPH2897	0	FALSE	-2.0829	0.937229	772	2	BPH2897,BPH2898
15	BPH2832--BPH2833	BPH2832	BPH2833	0	FALSE	14.6894	0.025974	546	2	BPH2832,BPH2833
15	BPH3482--BPH3508	BPH3482	BPH3508	8	FALSE	19.4178	0.114286	600	2	BPH3482,BPH3508
15	BPH3340--BPH3338	BPH3340	BPH3338	6	FALSE	145.303	0.0285714	740	3	BPH2792,BPH3340,BPH3338
15	BPH3751--BPH3750	BPH3751	BPH3750	1	FALSE	113.455	0.00865801	679	2	BPH3750,BPH3751
15	BPH3584--BPH3588	BPH3584	BPH3588	9	FALSE	6.1861	0.484848	705	2	BPH3584,BPH3588
15	BPH2784--BPH2860	BPH2784	BPH2860	134	FALSE	114.455	0.00952381	661	2	BPH2784,BPH2860
15	BPH2960--BPH2961	BPH2960	BPH2961	0	FALSE	0.570536	0.792208	644	2	BPH2960,BPH2961
15	BPH3535--BPH3752	BPH3535	BPH3752	0	FALSE	13.9253	0.132035	472	2	BPH3535,BPH3752
15	BPH2988--BPH2987	BPH2988	BPH2987	0	FALSE	15.2499	0.420635	770	2	BPH2987,BPH2988
15	BPH3304--BPH3268	BPH3304	BPH3268	2	FALSE	18.7354	0.792208	662	2	BPH3268,BPH3304
15	BPH2700--BPH2876	BPH2700	BPH2876	139	FALSE	37.4043	0.179654	655	3	BPH2700,BPH2876,BPH2877
15	BPH3602--BPH3612	BPH3602	BPH3612	10	FALSE	-7.65837	0.309524	681	2	BPH3612,BPH3602
15	BPH2990--BPH2989	BPH2990	BPH2989	0	FALSE	12.2099	0.0649351	543	3	BPH2989,BPH2990,BPH2991
15	BPH2729--BPH2728	BPH2729	BPH2728	6	FALSE	109.969	4.11353e-05	730	3	BPH2728,BPH2729,BPH2730
15	BPH2770--BPH2771	BPH2770	BPH2771	2	FALSE	3.1817	0.937229	739	2	BPH2770,BPH2771
15	BPH3389--BPH3460	BPH3389	BPH3460	0	FALSE	50.9954	0.428571	560	2	BPH3389,BPH3460
15	BPH2864--BPH2863	BPH2864	BPH2863	0	FALSE	-1.65592	0.937229	755	2	BPH2863,BPH2864
15	BPH3739--BPH3529	BPH3739	BPH3529	2	FALSE	4.79091	0.818182	441	2	BPH3529,BPH3739
15	BPH2947--BPH2948	BPH2947	BPH2948	0	FALSE	-23.761	0.179654	448	2	BPH2947,BPH2948
15	BPH2861--BPH2862	BPH2861	BPH2862	1	FALSE	23.7964	0.428571	765	2	BPH2861,BPH2862
15	BPH3244--BPH3284	BPH3244	BPH3284	5	FALSE	-3.35133	0.792208	527	2	BPH3244,BPH3284
15	BPH2841--BPH2840	BPH2841	BPH2840	0	FALSE	1.64172	0.484848	548	2	BPH2840,BPH2841
15	BPH3434--BPH3423	BPH3434	BPH3423	0	FALSE	41.9255	0.015873	601	3	BPH3423,BPH3434,BPH3746
15	BPH3479--BPH3477	BPH3479	BPH3477	16	FALSE	-3.12279	0.792208	736	2	BPH3477,BPH3479
15	BPH2714--BPH2713	BPH2714	BPH2713	2	FALSE	-17.3353	0.177489	716	2	BPH2713,BPH2714
15	BPH2872--BPH2873	BPH2872	BPH2873	0	FALSE	-12.0854	0.536797	646	2	BPH2872,BPH2873
15	BPH2962--BPH2963	BPH2962	BPH2963	5	FALSE	0.683086	0.818182	596	3	BPH2962,BPH2963,BPH2964
15	BPH3462--BPH3459	BPH3462	BPH3459	1	FALSE	27.469	0.171429	628	2	BPH3459,BPH3462
15	BPH2778--BPH2777	BPH2778	BPH2777	0	FALSE	7.81792	0.0930736	759	2	BPH2777,BPH2778
15	BPH2738--BPH2737	BPH2738	BPH2737	1	FALSE	9.31894	0.0649351	557	2	BPH2737,BPH2738
15	BPH3216--BPH3270	BPH3216	BPH3270	2	FALSE	9.95811	0.555556	567	2	BPH3216,BPH3270
15	BPH3274--BPH3282	BPH3274	BPH3282	1	FALSE	85.2295	0.015873	648	2	BPH3274,BPH3282
15	BPH3246--BPH3294	BPH3246	BPH3294	8	FALSE	23.2762	0.0411255	580	2	BPH3246,BPH3294
15	BPH2709--BPH2708	BPH2709	BPH2708	1	FALSE	-7.26096	0.420635	591	2	BPH2708,BPH2709
15	BPH3346--BPH3545	BPH3346	BPH3545	61	FALSE	-36.4419	0.0411255	473	3	BPH3346,BPH3443,BPH3545
15	BPH2857--BPH2852	BPH2857	BPH2852	1	FALSE	-9.66952	0.484848	664	2	BPH2852,BPH2857
15	BPH2807--BPH2808	BPH2807	BPH2808	0	FALSE	-6.67639	0.407867	688	2	BPH2807,BPH2808
15	BPH3733--BPH3336	BPH3733	BPH3336	2	FALSE	115.831	0.004329	649	2	BPH3336,BPH3733
15	BPH2825--BPH2824	BPH2825	BPH2824	0	FALSE	1.84537	0.937229	414	2	BPH2824,BPH2825
15	BPH2747--BPH2748	BPH2747	BPH2748	1	FALSE	6.33616	0.662338	427	2	BPH2747,BPH2748
15	BPH2755--BPH2754	BPH2755	BPH2754	0	FALSE	2.77606	1	630	2	BPH2754,BPH2755
15	BPH3548--BPH3524	BPH3548	BPH3524	0	FALSE	-39.9747	0.114286	757	2	BPH3524,BPH3548
15	BPH3501--BPH3489	BPH3501	BPH3489	3	FALSE	-9.97263	0.125541	690	2	BPH3489,BPH3501
15	BPH3337--BPH3734	BPH3337	BPH3734	4	FALSE	3.64288	0.818182	532	2	BPH3337,BPH3734
15	BPH3396--BPH3481	BPH3396	BPH3481	7	FALSE	-13.779	0.0666667	671	2	BPH3396,BPH3481
15	BPH2881--BPH2882	BPH2881	BPH2882	12	FALSE	1.33085	0.914286	615	2	BPH2881,BPH2882
15	BPH2819--BPH2820	BPH2819	BPH2820	2	FALSE	15.0066	0.24026	629	2	BPH2819,BPH2820
15	BPH3381--BPH3738	BPH3381	BPH3738	2	FALSE	-6.95866	0.930736	725	2	BPH3381,BPH3738
15	BPH2750--BPH2751	BPH2750	BPH2751	2	FALSE	-12.9316	0.588745	764	2	BPH2750,BPH2751
15	BPH2752--BPH2761	BPH2752	BPH2761	0	TRUE	-43.1603	0.031746	750	2	BPH2752,BPH2761
15	BPH3590--BPH3568	BPH3590	BPH3568	37	FALSE	46.2301	0.017316	695	2	BPH3590,BPH3568
15	BPH3352--BPH3736	BPH3352	BPH3736	2	FALSE	13.9241	0.588745	737	2	BPH3352,BPH3736
16	BPH3706--BPH3710	BPH3706	BPH3710	2	FALSE	-29.0627	0.0519481	494	4	BPH3668,BPH3710,BPH3706,BPH3757
16	BPH3529--BPH3523	BPH3529	BPH3523	44	FALSE	50.988	0.00865801	439	4	BPH3523,BPH3527,BPH3529,BPH3739
16	BPH3434--BPH3746	BPH3434	BPH3746	0	FALSE	29.3535	0.004329	602	2	BPH3434,BPH3746
16	BPH3493--BPH3744	BPH3493	BPH3744	6	FALSE	46.9301	0.0021645	430	9	BPH3401,BPH3493,BPH3742,BPH3417,BPH3743,BPH3744,BPH3745,BPH3463,BPH3741
16	BPH3262--BPH3220	BPH3262	BPH3220	15	FALSE	59.703	0.0519481	511	6	BPH3208,BPH3250,BPH3220,BPH3260,BPH3306,BPH3262
16	BPH2926--BPH2923	BPH2926	BPH2923	3	FALSE	6.05121	0.484848	584	4	BPH2922,BPH2923,BPH2924,BPH2926
16	BPH3752--BPH3535	BPH3752	BPH3535	2	FALSE	-13.9253	0.132035	472	2	BPH3535,BPH3752
16	BPH3372--BPH3376	BPH3372	BPH3376	35	FALSE	39.0895	0.004329	421	4	BPH2726,BPH2727,BPH3376,BPH3372
16	BPH2803--BPH2802	BPH2803	BPH2802	29	FALSE	12.719	0.393939	707	3	BPH2801,BPH2802,BPH2803
16	BPH2990--BPH2989	BPH2990	BPH2989	0	FALSE	12.2099	0.0649351	543	3	BPH2989,BPH2990,BPH2991
16	BPH3469--BPH3403	BPH3469	BPH3403	63	FALSE	15.9461	0.24026	444	10	BPH2947,BPH2948,BPH3439,BPH3453,BPH3457,BPH3431,BPH3469,BPH3403,BPH3413,BPH3499
16	BPH3284--BPH3244	BPH3284	BPH3244	5	FALSE	3.35133	0.792208	527	2	BPH3244,BPH3284
16	BPH2752--BPH2761	BPH2752	BPH2761	0	TRUE	-43.1603	0.031746	750	2	BPH2752,BPH2761
16	BPH2877--BPH2876	BPH2877	BPH2876	4	FALSE	20.6942	0.699134	656	2	BPH2876,BPH2877
16	BPH3435--BPH2896	BPH3435	BPH2896	40	FALSE	41.9079	0.0649351	417	5	BPH2710,BPH2780,BPH2896,BPH3382,BPH3435
16	BPH2819--BPH2820	BPH2819	BPH2820	2	FALSE	15.0066	0.24026	629	2	BPH2819,BPH2820
16	BPH3511--BPH3328	BPH3511	BPH3328	37	FALSE	-5.37033	1	467	3	BPH3328,BPH3485,BPH3511
16	BPH3648--BPH3755	BPH3648	BPH3755	7	FALSE	52.1839	0.0285714	497	5	BPH3648,BPH3650,BPH3652,BPH3694,BPH3755
16	BPH3696--BPH3664	BPH3696	BPH3664	26	FALSE	-5.47538	0.937229	516	3	BPH3632,BPH3696,BPH3664
16	BPH3660--BPH3643	BPH3660	BPH3643	38	FALSE	-3.14465	0.937229	504	8	BPH3643,BPH3700,BPH3674,BPH3753,BPH3682,BPH3686,BPH3660,BPH3684
16	BPH2981--BPH2982	BPH2981	BPH2982	13	FALSE	-47.2498	0.1	408	7	BPH2982,BPH2981,BPH2977,BPH2979,BPH2978,BPH2976,BPH2980
16	BPH2713--BPH2714	BPH2713	BPH2714	2	FALSE	17.3353	0.177489	716	2	BPH2713,BPH2714
16	BPH2738--BPH2737	BPH2738	BPH2737	1	FALSE	9.31894	0.0649351	557	2	BPH2737,BPH2738
16	BPH2770--BPH2771	BPH2770	BPH2771	2	FALSE	3.1817	0.937229	739	2	BPH2770,BPH2771
16	BPH3368--BPH3348	BPH3368	BPH3348	65	TRUE	-56.3119	0.004329	442	3	BPH3348,BPH3735,BPH3368
16	BPH2882--BPH2881	BPH2882	BPH2881	13	FALSE	-1.33085	0.914286	615	2	BPH2881,BPH2882
16	BPH2751--BPH2750	BPH2751	BPH2750	1	FALSE	12.9316	0.588745	764	2	BPH2750,BPH2751
16	BPH3294--BPH3246	BPH3294	BPH3246	6	FALSE	-23.2762	0.0411255	580	2	BPH3246,BPH3294
16	BPH2800--BPH2718	BPH2800	BPH2718	47	FALSE	7.02371	0.490842	456	5	BPH2718,BPH2946,BPH2798,BPH2799,BPH2800
16	BPH3320--BPH3292	BPH3320	BPH3292	40	FALSE	-23.4596	0.792208	519	4	BPH3204,BPH3226,BPH3292,BPH3320
16	BPH2942--BPH2943	BPH2942	BPH2943	0	FALSE	-3.36698	0.699134	636	2	BPH2942,BPH2943
16	BPH2973--BPH2975	BPH2973	BPH2975	0	FALSE	-26.6955	0.179654	769	2	BPH2973,BPH2975
16	BPH2961--BPH2960	BPH2961	BPH2960	0	FALSE	-0.570536	0.792208	644	2	BPH2960,BPH2961
16	BPH2815--BPH2814	BPH2815	BPH2814	0	FALSE	6.16038	0.484848	577	3	BPH2812,BPH2815,BPH2814
16	BPH2823--BPH2763	BPH2823	BPH2763	157	FALSE	-11.6822	0.00865801	657	3	BPH2763,BPH2764,BPH2823
16	BPH2866--BPH2867	BPH2866	BPH2867	1	FALSE	-22.3157	0.24026	558	2	BPH2866,BPH2867
16	BPH3545--BPH3443	BPH3545	BPH3443	42	FALSE	3.76094	1	473	3	BPH3346,BPH3443,BPH3545
16	BPH2962--BPH2964	BPH2962	BPH2964	0	FALSE	-39.886	0.0021645	596	3	BPH2962,BPH2963,BPH2964
16	BPH2860--BPH2784	BPH2860	BPH2784	147	TRUE	-114.455	0.00952381	661	2	BPH2784,BPH2860
16	BPH3596--BPH3628	BPH3596	BPH3628	20	FALSE	15.1389	0.329004	581	2	BPH3596,BPH3628
16	BPH3340--BPH3338	BPH3340	BPH3338	6	FALSE	145.303	0.0285714	740	3	BPH2792,BPH3340,BPH3338
16	BPH3636--BPH3692	BPH3636	BPH3692	4	FALSE	-0.809313	1	493	2	BPH3636,BPH3692
16	BPH2755--BPH2754	BPH2755	BPH2754	0	FALSE	2.77606	1	630	2	BPH2754,BPH2755
16	BPH3437--BPH3749	BPH3437	BPH3749	4	FALSE	2.2445	0.699134	693	2	BPH3437,BPH3749
16	BPH2869--BPH3638	BPH2869	BPH3638	42	FALSE	-2.5456	1	502	3	BPH2869,BPH3670,BPH3638
16	BPH2847--BPH2783	BPH2847	BPH2783	42	FALSE	-6.23793	0.47619	684	4	BPH2783,BPH2842,BPH2843,BPH2847
16	BPH3734--BPH3337	BPH3734	BPH3337	3	FALSE	-3.64288	0.818182	532	2	BPH3337,BPH3734
16	BPH2729--BPH2728	BPH2729	BPH2728	6	FALSE	109.969	4.11353e-05	730	3	BPH2728,BPH2729,BPH2730
16	BPH2858--BPH2720	BPH2858	BPH2720	38	TRUE	-79.6552	0.0021645	677	3	BPH2720,BPH2742,BPH2858
16	BPH3704--BPH3702	BPH3704	BPH3702	13	FALSE	3.12018	0.761905	487	3	BPH2787,BPH3704,BPH3702
16	BPH3381--BPH3738	BPH3381	BPH3738	2	FALSE	-6.95866	0.930736	725	2	BPH3381,BPH3738
16	BPH3236--BPH3316	BPH3236	BPH3316	95	FALSE	-45.8284	0.309524	524	3	BPH3236,BPH3258,BPH3316
16	BPH3590--BPH3568	BPH3590	BPH3568	37	FALSE	46.2301	0.017316	695	2	BPH3590,BPH3568
16	BPH2704--BPH2705	BPH2704	BPH2705	0	FALSE	36.4124	0.0151515	700	2	BPH2704,BPH2705
16	BPH3612--BPH3602	BPH3612	BPH3602	11	FALSE	7.65837	0.309524	681	2	BPH3612,BPH3602
16	BPH3460--BPH3389	BPH3460	BPH3389	1	FALSE	-50.9954	0.428571	560	2	BPH3389,BPH3460
16	BPH2872--BPH2873	BPH2872	BPH2873	0	FALSE	-12.0854	0.536797	646	2	BPH2872,BPH2873
16	BPH3640--BPH3688	BPH3640	BPH3688	25	FALSE	-0.380341	1	501	2	BPH3640,BPH3688
16	BPH2887--BPH2888	BPH2887	BPH2888	0	FALSE	2.50728	0.914286	735	2	BPH2887,BPH2888
16	BPH2748--BPH2747	BPH2748	BPH2747	2	FALSE	-6.33616	0.662338	427	2	BPH2747,BPH2748
16	BPH2884--BPH2883	BPH2884	BPH2883	0	FALSE	-0.76274	0.84127	634	2	BPH2883,BPH2884
16	BPH3462--BPH3459	BPH3462	BPH3459	1	FALSE	27.469	0.171429	628	2	BPH3459,BPH3462
16	BPH3588--BPH3584	BPH3588	BPH3584	9	FALSE	-6.1861	0.484848	705	2	BPH3584,BPH3588
16	BPH3270--BPH3216	BPH3270	BPH3216	2	FALSE	-9.95811	0.555556	567	2	BPH3216,BPH3270
16	BPH2863--BPH2864	BPH2863	BPH2864	0	FALSE	1.65592	0.937229	755	2	BPH2863,BPH2864
16	BPH2824--BPH2825	BPH2824	BPH2825	0	FALSE	-1.84537	0.937229	414	2	BPH2824,BPH2825
16	BPH2709--BPH2708	BPH2709	BPH2708	1	FALSE	-7.26096	0.420635	591	2	BPH2708,BPH2709
16	BPH3336--BPH3733	BPH3336	BPH3733	2	TRUE	-115.831	0.004329	649	2	BPH3336,BPH3733
16	BPH2841--BPH2840	BPH2841	BPH2840	0	FALSE	1.64172	0.484848	548	2	BPH2840,BPH2841
16	BPH2777--BPH2778	BPH2777	BPH2778	0	FALSE	-7.81792	0.0930736	759	2	BPH2777,BPH2778
16	BPH2898--BPH2897	BPH2898	BPH2897	0	FALSE	-2.0829	0.937229	772	2	BPH2897,BPH2898
16	BPH3433--BPH3748	BPH3433	BPH3748	0	FALSE	-26.3053	0.00952381	438	2	BPH3433,BPH3748
16	BPH2966--BPH2965	BPH2966	BPH2965	0	FALSE	-9.15242	0.24026	531	2	BPH2965,BPH2966
16	BPH3427--BPH3747	BPH3427	BPH3747	1	FALSE	7.72504	0.309524	692	2	BPH3427,BPH3747
16	BPH2850--BPH2849	BPH2850	BPH2849	1	FALSE	-7.89025	0.662338	645	2	BPH2849,BPH2850
16	BPH3736--BPH3352	BPH3736	BPH3352	1	FALSE	-13.9241	0.588745	737	2	BPH3352,BPH3736
16	BPH3508--BPH3482	BPH3508	BPH3482	8	FALSE	-19.4178	0.114286	600	2	BPH3482,BPH3508
16	BPH2987--BPH2988	BPH2987	BPH2988	0	FALSE	-15.2499	0.420635	770	2	BPH2987,BPH2988
16	BPH2807--BPH2808	BPH2807	BPH2808	0	FALSE	-6.67639	0.407867	688	2	BPH2807,BPH2808
16	BPH3501--BPH3489	BPH3501	BPH3489	3	FALSE	-9.97263	0.125541	690	2	BPH3489,BPH3501
16	BPH3274--BPH3282	BPH3274	BPH3282	1	FALSE	85.2295	0.015873	648	2	BPH3274,BPH3282
16	BPH3479--BPH3477	BPH3479	BPH3477	16	FALSE	-3.12279	0.792208	736	2	BPH3477,BPH3479
16	BPH3737--BPH3356	BPH3737	BPH3356	0	FALSE	-44.7685	0.588745	469	2	BPH3356,BPH3737
16	BPH3362--BPH3366	BPH3362	BPH3366	18	FALSE	60.6017	0.0021645	415	2	BPH3362,BPH3366
16	BPH2862--BPH2861	BPH2862	BPH2861	2	FALSE	-23.7964	0.428571	765	2	BPH2861,BPH2862
16	BPH2953--BPH2952	BPH2953	BPH2952	2	FALSE	-9.27368	0.177489	726	2	BPH2952,BPH2953
16	BPH3268--BPH3304	BPH3268	BPH3304	2	FALSE	-18.7354	0.792208	662	2	BPH3268,BPH3304
16	BPH2852--BPH2857	BPH2852	BPH2857	1	FALSE	9.66952	0.484848	664	2	BPH2852,BPH2857
16	BPH3750--BPH3751	BPH3750	BPH3751	0	TRUE	-113.455	0.00865801	679	2	BPH3750,BPH3751
16	BPH3548--BPH3524	BPH3548	BPH3524	0	FALSE	-39.9747	0.114286	757	2	BPH3524,BPH3548
16	BPH2890--BPH2891	BPH2890	BPH2891	0	FALSE	16.8054	0.150794	659	2	BPH2890,BPH2891
16	BPH2779--BPH3394	BPH2779	BPH3394	38	FALSE	1.75762	0.662338	465	2	BPH2779,BPH3394
16	BPH2833--BPH2832	BPH2833	BPH2832	0	FALSE	-14.6894	0.025974	546	2	BPH2832,BPH2833
16	BPH3396--BPH3481	BPH3396	BPH3481	7	FALSE	-13.779	0.0666667	671	2	BPH3396,BPH3481
17	BPH3755--BPH3658	BPH3755	BPH3658	4	FALSE	-18.1273	0.914286	489	13	BPH3636,BPH3692,BPH3668,BPH3710,BPH3706,BPH3757,BPH3658,BPH3672,BPH3648,BPH3650,BPH3652,BPH3694,BPH3755
17	BPH2801--BPH2803	BPH2801	BPH2803	25	FALSE	3.66723	0.572761	707	3	BPH2801,BPH2802,BPH2803
17	BPH3741--BPH3742	BPH3741	BPH3742	6	FALSE	30.8933	0.017316	430	9	BPH3401,BPH3493,BPH3742,BPH3417,BPH3743,BPH3744,BPH3745,BPH3463,BPH3741
17	BPH2860--BPH2784	BPH2860	BPH2784	147	TRUE	-114.455	0.00952381	661	2	BPH2784,BPH2860
17	BPH3443--BPH3547	BPH3443	BPH3547	53	FALSE	61.5993	0.017316	461	15	BPH2779,BPH3394,BPH2907,BPH3328,BPH3485,BPH3511,BPH3356,BPH3737,BPH3547,BPH3360,BPH3535,BPH3752,BPH3346,BPH3443,BPH3545
17	BPH3226--BPH3292	BPH3226	BPH3292	5	FALSE	2.89786	0.792208	521	2	BPH3226,BPH3292
17	BPH3682--BPH3700	BPH3682	BPH3700	40	FALSE	-28.8829	0.0649351	505	6	BPH3643,BPH3700,BPH3674,BPH3753,BPH3682,BPH3686
17	BPH2718--BPH2800	BPH2718	BPH2800	52	FALSE	-7.02371	0.490842	456	5	BPH2718,BPH2946,BPH2798,BPH2799,BPH2800
17	BPH3376--BPH3382	BPH3376	BPH3382	25	FALSE	22.092	0.393939	416	9	BPH2710,BPH2780,BPH2896,BPH3382,BPH3435,BPH2726,BPH2727,BPH3376,BPH3372
17	BPH2833--BPH2831	BPH2833	BPH2831	0	FALSE	-13.5635	0.0519481	545	3	BPH2831,BPH2832,BPH2833
17	BPH2820--BPH2819	BPH2820	BPH2819	2	FALSE	-15.0066	0.24026	629	2	BPH2819,BPH2820
17	BPH2709--BPH2708	BPH2709	BPH2708	1	FALSE	-7.26096	0.420635	591	2	BPH2708,BPH2709
17	BPH3523--BPH3739	BPH3523	BPH3739	42	TRUE	-55.779	0.004329	439	4	BPH3523,BPH3527,BPH3529,BPH3739
17	BPH2857--BPH2852	BPH2857	BPH2852	1	FALSE	-9.66952	0.484848	664	2	BPH2852,BPH2857
17	BPH2714--BPH2713	BPH2714	BPH2713	2	FALSE	-17.3353	0.177489	716	2	BPH2713,BPH2714
17	BPH3423--BPH3746	BPH3423	BPH3746	0	FALSE	-12.572	0.257143	601	3	BPH3423,BPH3434,BPH3746
17	BPH2980--BPH2976	BPH2980	BPH2976	1	FALSE	-1.7742	1	411	2	BPH2976,BPH2980
17	BPH3439--BPH3457	BPH3439	BPH3457	15	FALSE	3.59932	0.662338	449	3	BPH3439,BPH3453,BPH3457
17	BPH2974--BPH2975	BPH2974	BPH2975	0	FALSE	6.43345	0.428571	768	3	BPH2973,BPH2975,BPH2974
17	BPH2924--BPH2926	BPH2924	BPH2926	4	FALSE	-123.866	0.0021645	584	4	BPH2922,BPH2923,BPH2924,BPH2926
17	BPH2965--BPH2966	BPH2965	BPH2966	0	FALSE	9.15242	0.24026	531	2	BPH2965,BPH2966
17	BPH3734--BPH3337	BPH3734	BPH3337	3	FALSE	-3.64288	0.818182	532	2	BPH3337,BPH3734
17	BPH2728--BPH2730	BPH2728	BPH2730	0	FALSE	6.59919	0.604813	730	3	BPH2728,BPH2729,BPH2730
17	BPH2847--BPH2783	BPH2847	BPH2783	42	FALSE	-6.23793	0.47619	684	4	BPH2783,BPH2842,BPH2843,BPH2847
17	BPH3284--BPH3244	BPH3284	BPH3244	5	FALSE	3.35133	0.792208	527	2	BPH3244,BPH3284
17	BPH2961--BPH2960	BPH2961	BPH2960	0	FALSE	-0.570536	0.792208	644	2	BPH2960,BPH2961
17	BPH2815--BPH2814	BPH2815	BPH2814	0	FALSE	6.16038	0.484848	577	3	BPH2812,BPH2815,BPH2814
17	BPH3274--BPH3282	BPH3274	BPH3282	1	FALSE	85.2295	0.015873	648	2	BPH3274,BPH3282
17	BPH2882--BPH2881	BPH2882	BPH2881	13	FALSE	-1.33085	0.914286	615	2	BPH2881,BPH2882
17	BPH2787--BPH3704	BPH2787	BPH3704	46	FALSE	-51.5411	0.0040404	488	2	BPH2787,BPH3704
17	BPH2861--BPH2862	BPH2861	BPH2862	1	FALSE	23.7964	0.428571	765	2	BPH2861,BPH2862
17	BPH3276--BPH3258	BPH3276	BPH3258	122	FALSE	26.9911	0.536797	523	4	BPH3236,BPH3258,BPH3316,BPH3276
17	BPH2979--BPH2978	BPH2979	BPH2978	2	FALSE	2.30274	0.7	412	3	BPH2977,BPH2979,BPH2978
17	BPH2990--BPH2989	BPH2990	BPH2989	0	FALSE	12.2099	0.0649351	543	3	BPH2989,BPH2990,BPH2991
17	BPH3208--BPH3250	BPH3208	BPH3250	2	FALSE	24.0497	0.125541	514	2	BPH3208,BPH3250
17	BPH3481--BPH3396	BPH3481	BPH3396	7	FALSE	13.779	0.0666667	671	2	BPH3396,BPH3481
17	BPH2824--BPH2825	BPH2824	BPH2825	0	FALSE	-1.84537	0.937229	414	2	BPH2824,BPH2825
17	BPH3632--BPH3664	BPH3632	BPH3664	22	FALSE	11.8277	0.699134	516	3	BPH3632,BPH3696,BPH3664
17	BPH3368--BPH3735	BPH3368	BPH3735	62	FALSE	-50.4856	0.0021645	442	3	BPH3348,BPH3735,BPH3368
17	BPH2963--BPH2964	BPH2963	BPH2964	5	TRUE	-40.5691	0.0021645	597	2	BPH2963,BPH2964
17	BPH3751--BPH3750	BPH3751	BPH3750	1	FALSE	113.455	0.00865801	679	2	BPH3750,BPH3751
17	BPH3336--BPH3733	BPH3336	BPH3733	2	TRUE	-115.831	0.004329	649	2	BPH3336,BPH3733
17	BPH2988--BPH2987	BPH2988	BPH2987	0	FALSE	15.2499	0.420635	770	2	BPH2987,BPH2988
17	BPH3477--BPH3479	BPH3477	BPH3479	15	FALSE	3.12279	0.792208	736	2	BPH3477,BPH3479
17	BPH3738--BPH3381	BPH3738	BPH3381	1	FALSE	6.95866	0.930736	725	2	BPH3381,BPH3738
17	BPH2752--BPH2761	BPH2752	BPH2761	0	TRUE	-43.1603	0.031746	750	2	BPH2752,BPH2761
17	BPH2764--BPH2763	BPH2764	BPH2763	30	TRUE	-152.852	0.0011655	658	2	BPH2763,BPH2764
17	BPH2876--BPH2700	BPH2876	BPH2700	150	FALSE	-37.4043	0.179654	655	3	BPH2700,BPH2876,BPH2877
17	BPH2897--BPH2898	BPH2897	BPH2898	0	FALSE	2.0829	0.937229	772	2	BPH2897,BPH2898
17	BPH2867--BPH2866	BPH2867	BPH2866	2	FALSE	22.3157	0.24026	558	2	BPH2866,BPH2867
17	BPH2863--BPH2864	BPH2863	BPH2864	0	FALSE	1.65592	0.937229	755	2	BPH2863,BPH2864
17	BPH2750--BPH2751	BPH2750	BPH2751	2	FALSE	-12.9316	0.588745	764	2	BPH2750,BPH2751
17	BPH3628--BPH3596	BPH3628	BPH3596	21	FALSE	-15.1389	0.329004	581	2	BPH3596,BPH3628
17	BPH3747--BPH3427	BPH3747	BPH3427	2	FALSE	-7.72504	0.309524	692	2	BPH3427,BPH3747
17	BPH3270--BPH3216	BPH3270	BPH3216	2	FALSE	-9.95811	0.555556	567	2	BPH3216,BPH3270
17	BPH2891--BPH2890	BPH2891	BPH2890	0	FALSE	-16.8054	0.150794	659	2	BPH2890,BPH2891
17	BPH2755--BPH2754	BPH2755	BPH2754	0	FALSE	2.77606	1	630	2	BPH2754,BPH2755
17	BPH3338--BPH3340	BPH3338	BPH3340	7	FALSE	-145.303	0.0285714	740	3	BPH2792,BPH3340,BPH3338
17	BPH3403--BPH3413	BPH3403	BPH3413	3	FALSE	2.20539	1	452	2	BPH3403,BPH3413
17	BPH3508--BPH3482	BPH3508	BPH3482	8	FALSE	-19.4178	0.114286	600	2	BPH3482,BPH3508
17	BPH3260--BPH3306	BPH3260	BPH3306	2	FALSE	29.9898	0.393939	515	2	BPH3260,BPH3306
17	BPH2952--BPH2953	BPH2952	BPH2953	2	FALSE	9.27368	0.177489	726	2	BPH2952,BPH2953
17	BPH2777--BPH2778	BPH2777	BPH2778	0	FALSE	-7.81792	0.0930736	759	2	BPH2777,BPH2778
17	BPH2737--BPH2738	BPH2737	BPH2738	1	FALSE	-9.31894	0.0649351	557	2	BPH2737,BPH2738
17	BPH3304--BPH3268	BPH3304	BPH3268	2	FALSE	18.7354	0.792208	662	2	BPH3268,BPH3304
17	BPH2858--BPH2720	BPH2858	BPH2720	38	TRUE	-79.6552	0.0021645	677	3	BPH2720,BPH2742,BPH2858
17	BPH2884--BPH2883	BPH2884	BPH2883	0	FALSE	-0.76274	0.84127	634	2	BPH2883,BPH2884
17	BPH2850--BPH2849	BPH2850	BPH2849	1	FALSE	-7.89025	0.662338	645	2	BPH2849,BPH2850
17	BPH3588--BPH3584	BPH3588	BPH3584	9	FALSE	-6.1861	0.484848	705	2	BPH3584,BPH3588
17	BPH2943--BPH2942	BPH2943	BPH2942	0	FALSE	3.36698	0.699134	636	2	BPH2942,BPH2943
17	BPH3437--BPH3749	BPH3437	BPH3749	4	FALSE	2.2445	0.699134	693	2	BPH3437,BPH3749
17	BPH3460--BPH3389	BPH3460	BPH3389	1	FALSE	-50.9954	0.428571	560	2	BPH3389,BPH3460
17	BPH3640--BPH3688	BPH3640	BPH3688	25	FALSE	-0.380341	1	501	2	BPH3640,BPH3688
17	BPH3524--BPH3548	BPH3524	BPH3548	1	FALSE	39.9747	0.114286	757	2	BPH3524,BPH3548
17	BPH2771--BPH2770	BPH2771	BPH2770	2	FALSE	-3.1817	0.937229	739	2	BPH2770,BPH2771
17	BPH3684--BPH3660	BPH3684	BPH3660	52	FALSE	2.24833	0.818182	510	2	BPH3660,BPH3684
17	BPH3670--BPH3638	BPH3670	BPH3638	31	FALSE	-15.5445	0.536797	502	3	BPH2869,BPH3670,BPH3638
17	BPH2873--BPH2872	BPH2873	BPH2872	0	FALSE	12.0854	0.536797	646	2	BPH2872,BPH2873
17	BPH3366--BPH3362	BPH3366	BPH3362	17	TRUE	-60.6017	0.0021645	415	2	BPH3362,BPH3366
17	BPH2808--BPH2807	BPH2808	BPH2807	0	FALSE	6.67639	0.407867	688	2	BPH2807,BPH2808
17	BPH3433--BPH3748	BPH3433	BPH3748	0	FALSE	-26.3053	0.00952381	438	2	BPH3433,BPH3748
17	BPH3294--BPH3246	BPH3294	BPH3246	6	FALSE	-23.2762	0.0411255	580	2	BPH3246,BPH3294
17	BPH3612--BPH3602	BPH3612	BPH3602	11	FALSE	7.65837	0.309524	681	2	BPH3612,BPH3602
17	BPH3459--BPH3462	BPH3459	BPH3462	2	FALSE	-27.469	0.171429	628	2	BPH3459,BPH3462
17	BPH2841--BPH2840	BPH2841	BPH2840	0	FALSE	1.64172	0.484848	548	2	BPH2840,BPH2841
17	BPH3489--BPH3501	BPH3489	BPH3501	2	FALSE	9.97263	0.125541	690	2	BPH3489,BPH3501
17	BPH2888--BPH2887	BPH2888	BPH2887	0	FALSE	-2.50728	0.914286	735	2	BPH2887,BPH2888
17	BPH3736--BPH3352	BPH3736	BPH3352	1	FALSE	-13.9241	0.588745	737	2	BPH3352,BPH3736
17	BPH3568--BPH3590	BPH3568	BPH3590	37	TRUE	-46.2301	0.017316	695	2	BPH3590,BPH3568
17	BPH2947--BPH2948	BPH2947	BPH2948	0	FALSE	-23.761	0.179654	448	2	BPH2947,BPH2948
17	BPH2705--BPH2704	BPH2705	BPH2704	0	TRUE	-36.4124	0.0151515	700	2	BPH2704,BPH2705
17	BPH2748--BPH2747	BPH2748	BPH2747	2	FALSE	-6.33616	0.662338	427	2	BPH2747,BPH2748
18	BPH3417--BPH3748	BPH3417	BPH3748	24	FALSE	-71.6964	0.0021645	429	11	BPH3401,BPH3493,BPH3742,BPH3417,BPH3743,BPH3744,BPH3745,BPH3463,BPH3741,BPH3433,BPH3748
18	BPH3686--BPH3648	BPH3686	BPH3648	56	FALSE	-24.3577	0.47619	480	32	BPH2787,BPH3704,BPH3702,BPH3666,BPH3636,BPH3692,BPH3668,BPH3710,BPH3706,BPH3757,BPH3658,BPH3672,BPH3648,BPH3650,BPH3652,BPH3694,BPH3755,BPH3640,BPH3688,BPH3662,BPH2869,BPH3670,BPH3638,BPH3202,BPH3643,BPH3700,BPH3674,BPH3753,BPH3682,BPH3686,BPH3660,BPH3684
18	BPH3545--BPH3328	BPH3545	BPH3328	91	FALSE	-7.56579	0.309524	461	15	BPH2779,BPH3394,BPH2907,BPH3328,BPH3485,BPH3511,BPH3356,BPH3737,BPH3547,BPH3360,BPH3535,BPH3752,BPH3346,BPH3443,BPH3545
18	BPH2982--BPH2979	BPH2982	BPH2979	17	FALSE	34.8102	0.1	408	7	BPH2982,BPH2981,BPH2977,BPH2979,BPH2978,BPH2976,BPH2980
18	BPH3250--BPH3208	BPH3250	BPH3208	6	FALSE	-24.0497	0.125541	514	2	BPH3208,BPH3250
18	BPH2841--BPH2840	BPH2841	BPH2840	0	FALSE	1.64172	0.484848	548	2	BPH2840,BPH2841
18	BPH3216--BPH3270	BPH3216	BPH3270	2	FALSE	9.95811	0.555556	567	2	BPH3216,BPH3270
18	BPH3366--BPH3362	BPH3366	BPH3362	17	TRUE	-60.6017	0.0021645	415	2	BPH3362,BPH3366
18	BPH2864--BPH2863	BPH2864	BPH2863	0	FALSE	-1.65592	0.937229	755	2	BPH2863,BPH2864
18	BPH2700--BPH2876	BPH2700	BPH2876	139	FALSE	37.4043	0.179654	655	3	BPH2700,BPH2876,BPH2877
18	BPH3236--BPH3276	BPH3236	BPH3276	118	FALSE	-36.0999	0.428571	523	4	BPH3236,BPH3258,BPH3316,BPH3276
18	BPH2815--BPH2812	BPH2815	BPH2812	0	FALSE	2.00875	0.937229	578	2	BPH2812,BPH2815
18	BPH3738--BPH3381	BPH3738	BPH3381	1	FALSE	6.95866	0.930736	725	2	BPH3381,BPH3738
18	BPH2799--BPH2718	BPH2799	BPH2718	47	FALSE	17.6246	0.179654	456	5	BPH2718,BPH2946,BPH2798,BPH2799,BPH2800
18	BPH3376--BPH2896	BPH3376	BPH2896	42	FALSE	6.74625	0.699134	416	9	BPH2710,BPH2780,BPH2896,BPH3382,BPH3435,BPH2726,BPH2727,BPH3376,BPH3372
18	BPH2748--BPH2747	BPH2748	BPH2747	2	FALSE	-6.33616	0.662338	427	2	BPH2747,BPH2748
18	BPH2963--BPH2964	BPH2963	BPH2964	5	TRUE	-40.5691	0.0021645	597	2	BPH2963,BPH2964
18	BPH2873--BPH2872	BPH2873	BPH2872	0	FALSE	12.0854	0.536797	646	2	BPH2872,BPH2873
18	BPH3434--BPH3746	BPH3434	BPH3746	0	FALSE	29.3535	0.004329	602	2	BPH3434,BPH3746
18	BPH2755--BPH2754	BPH2755	BPH2754	0	FALSE	2.77606	1	630	2	BPH2754,BPH2755
18	BPH3481--BPH3396	BPH3481	BPH3396	7	FALSE	13.779	0.0666667	671	2	BPH3396,BPH3481
18	BPH3739--BPH3529	BPH3739	BPH3529	2	FALSE	4.79091	0.818182	441	2	BPH3529,BPH3739
18	BPH3348--BPH3735	BPH3348	BPH3735	3	FALSE	5.82626	0.177489	443	2	BPH3348,BPH3735
18	BPH3246--BPH3294	BPH3246	BPH3294	8	FALSE	23.2762	0.0411255	580	2	BPH3246,BPH3294
18	BPH3508--BPH3482	BPH3508	BPH3482	8	FALSE	-19.4178	0.114286	600	2	BPH3482,BPH3508
18	BPH2966--BPH2965	BPH2966	BPH2965	0	FALSE	-9.15242	0.24026	531	2	BPH2965,BPH2966
18	BPH3524--BPH3548	BPH3524	BPH3548	1	FALSE	39.9747	0.114286	757	2	BPH3524,BPH3548
18	BPH3204--BPH3292	BPH3204	BPH3292	7	FALSE	33.6551	0.609524	520	3	BPH3204,BPH3226,BPH3292
18	BPH2890--BPH2891	BPH2890	BPH2891	0	FALSE	16.8054	0.150794	659	2	BPH2890,BPH2891
18	BPH2866--BPH2867	BPH2866	BPH2867	1	FALSE	-22.3157	0.24026	558	2	BPH2866,BPH2867
18	BPH2713--BPH2714	BPH2713	BPH2714	2	FALSE	17.3353	0.177489	716	2	BPH2713,BPH2714
18	BPH2960--BPH2961	BPH2960	BPH2961	0	FALSE	0.570536	0.792208	644	2	BPH2960,BPH2961
18	BPH2852--BPH2857	BPH2852	BPH2857	1	FALSE	9.66952	0.484848	664	2	BPH2852,BPH2857
18	BPH2925--BPH2926	BPH2925	BPH2926	4	FALSE	-106.565	0.0021645	583	5	BPH2922,BPH2923,BPH2924,BPH2926,BPH2925
18	BPH3734--BPH3337	BPH3734	BPH3337	3	FALSE	-3.64288	0.818182	532	2	BPH3337,BPH3734
18	BPH2858--BPH3751	BPH2858	BPH3751	36	FALSE	-64.6254	0.0021645	676	5	BPH2720,BPH2742,BPH2858,BPH3750,BPH3751
18	BPH3304--BPH3268	BPH3304	BPH3268	2	FALSE	18.7354	0.792208	662	2	BPH3268,BPH3304
18	BPH3479--BPH3477	BPH3479	BPH3477	16	FALSE	-3.12279	0.792208	736	2	BPH3477,BPH3479
18	BPH2729--BPH2730	BPH2729	BPH2730	6	FALSE	116.568	4.11353e-05	731	2	BPH2729,BPH2730
18	BPH3413--BPH3499	BPH3413	BPH3499	32	FALSE	-68.794	0.0021645	451	3	BPH3403,BPH3413,BPH3499
18	BPH2887--BPH2888	BPH2887	BPH2888	0	FALSE	2.50728	0.914286	735	2	BPH2887,BPH2888
18	BPH3628--BPH3596	BPH3628	BPH3596	21	FALSE	-15.1389	0.329004	581	2	BPH3596,BPH3628
18	BPH2833--BPH2831	BPH2833	BPH2831	0	FALSE	-13.5635	0.0519481	545	3	BPH2831,BPH2832,BPH2833
18	BPH2770--BPH2771	BPH2770	BPH2771	2	FALSE	3.1817	0.937229	739	2	BPH2770,BPH2771
18	BPH3568--BPH3590	BPH3568	BPH3590	37	TRUE	-46.2301	0.017316	695	2	BPH3590,BPH3568
18	BPH3352--BPH3736	BPH3352	BPH3736	2	FALSE	13.9241	0.588745	737	2	BPH3352,BPH3736
18	BPH2751--BPH2750	BPH2751	BPH2750	1	FALSE	12.9316	0.588745	764	2	BPH2750,BPH2751
18	BPH2947--BPH2948	BPH2947	BPH2948	0	FALSE	-23.761	0.179654	448	2	BPH2947,BPH2948
18	BPH2898--BPH2897	BPH2898	BPH2897	0	FALSE	-2.0829	0.937229	772	2	BPH2897,BPH2898
18	BPH2991--BPH2990	BPH2991	BPH2990	0	FALSE	-1.76518	0.588745	544	2	BPH2990,BPH2991
18	BPH2825--BPH2824	BPH2825	BPH2824	0	FALSE	1.84537	0.937229	414	2	BPH2824,BPH2825
18	BPH2737--BPH2738	BPH2737	BPH2738	1	FALSE	-9.31894	0.0649351	557	2	BPH2737,BPH2738
18	BPH2708--BPH2709	BPH2708	BPH2709	0	FALSE	7.26096	0.420635	591	2	BPH2708,BPH2709
18	BPH3664--BPH3696	BPH3664	BPH3696	24	FALSE	5.47538	0.937229	516	3	BPH3632,BPH3696,BPH3664
18	BPH2860--BPH2784	BPH2860	BPH2784	147	TRUE	-114.455	0.00952381	661	2	BPH2784,BPH2860
18	BPH3244--BPH3284	BPH3244	BPH3284	5	FALSE	-3.35133	0.792208	527	2	BPH3244,BPH3284
18	BPH3274--BPH3282	BPH3274	BPH3282	1	FALSE	85.2295	0.015873	648	2	BPH3274,BPH3282
18	BPH3747--BPH3427	BPH3747	BPH3427	2	FALSE	-7.72504	0.309524	692	2	BPH3427,BPH3747
18	BPH2801--BPH2802	BPH2801	BPH2802	9	FALSE	16.3863	0.141858	708	2	BPH2801,BPH2802
18	BPH2778--BPH2777	BPH2778	BPH2777	0	FALSE	7.81792	0.0930736	759	2	BPH2777,BPH2778
18	BPH2783--BPH2847	BPH2783	BPH2847	33	FALSE	6.23793	0.47619	684	4	BPH2783,BPH2842,BPH2843,BPH2847
18	BPH3457--BPH3439	BPH3457	BPH3439	14	FALSE	-3.59932	0.662338	449	3	BPH3439,BPH3453,BPH3457
18	BPH2881--BPH2882	BPH2881	BPH2882	12	FALSE	1.33085	0.914286	615	2	BPH2881,BPH2882
18	BPH2952--BPH2953	BPH2952	BPH2953	2	FALSE	9.27368	0.177489	726	2	BPH2952,BPH2953
18	BPH2974--BPH2975	BPH2974	BPH2975	0	FALSE	6.43345	0.428571	768	3	BPH2973,BPH2975,BPH2974
18	BPH2763--BPH2823	BPH2763	BPH2823	161	FALSE	11.6822	0.00865801	657	3	BPH2763,BPH2764,BPH2823
18	BPH3602--BPH3612	BPH3602	BPH3612	10	FALSE	-7.65837	0.309524	681	2	BPH3612,BPH3602
18	BPH3588--BPH3584	BPH3588	BPH3584	9	FALSE	-6.1861	0.484848	705	2	BPH3584,BPH3588
18	BPH3260--BPH3306	BPH3260	BPH3306	2	FALSE	29.9898	0.393939	515	2	BPH3260,BPH3306
18	BPH3733--BPH3336	BPH3733	BPH3336	2	FALSE	115.831	0.004329	649	2	BPH3336,BPH3733
18	BPH2761--BPH2752	BPH2761	BPH2752	0	FALSE	43.1603	0.031746	750	2	BPH2752,BPH2761
18	BPH3460--BPH3389	BPH3460	BPH3389	1	FALSE	-50.9954	0.428571	560	2	BPH3389,BPH3460
18	BPH2849--BPH2850	BPH2849	BPH2850	1	FALSE	7.89025	0.662338	645	2	BPH2849,BPH2850
18	BPH3523--BPH3527	BPH3523	BPH3527	16	FALSE	-19.575	0.246753	440	2	BPH3523,BPH3527
18	BPH2942--BPH2943	BPH2942	BPH2943	0	FALSE	-3.36698	0.699134	636	2	BPH2942,BPH2943
18	BPH2884--BPH2883	BPH2884	BPH2883	0	FALSE	-0.76274	0.84127	634	2	BPH2883,BPH2884
18	BPH2862--BPH2861	BPH2862	BPH2861	2	FALSE	-23.7964	0.428571	765	2	BPH2861,BPH2862
18	BPH2808--BPH2807	BPH2808	BPH2807	0	FALSE	6.67639	0.407867	688	2	BPH2807,BPH2808
18	BPH2704--BPH2705	BPH2704	BPH2705	0	FALSE	36.4124	0.0151515	700	2	BPH2704,BPH2705
18	BPH3501--BPH3489	BPH3501	BPH3489	3	FALSE	-9.97263	0.125541	690	2	BPH3489,BPH3501
18	BPH2820--BPH2819	BPH2820	BPH2819	2	FALSE	-15.0066	0.24026	629	2	BPH2819,BPH2820
18	BPH3340--BPH3338	BPH3340	BPH3338	6	FALSE	145.303	0.0285714	740	3	BPH2792,BPH3340,BPH3338
18	BPH3459--BPH3462	BPH3459	BPH3462	2	FALSE	-27.469	0.171429	628	2	BPH3459,BPH3462
18	BPH3749--BPH3437	BPH3749	BPH3437	4	FALSE	-2.2445	0.699134	693	2	BPH3437,BPH3749
18	BPH2988--BPH2987	BPH2988	BPH2987	0	FALSE	15.2499	0.420635	770	2	BPH2987,BPH2988
19	BPH3688--BPH3682	BPH3688	BPH3682	44	FALSE	92.4601	0.0021645	480	32	BPH2787,BPH3704,BPH3702,BPH3666,BPH3636,BPH3692,BPH3668,BPH3710,BPH3706,BPH3757,BPH3658,BPH3672,BPH3648,BPH3650,BPH3652,BPH3694,BPH3755,BPH3640,BPH3688,BPH3662,BPH2869,BPH3670,BPH3638,BPH3202,BPH3643,BPH3700,BPH3674,BPH3753,BPH3682,BPH3686,BPH3660,BPH3684
19	BPH3433--BPH3744	BPH3433	BPH3744	23	FALSE	57.0265	0.00952381	429	11	BPH3401,BPH3493,BPH3742,BPH3417,BPH3743,BPH3744,BPH3745,BPH3463,BPH3741,BPH3433,BPH3748
19	BPH3435--BPH2896	BPH3435	BPH2896	40	FALSE	41.9079	0.0649351	417	5	BPH2710,BPH2780,BPH2896,BPH3382,BPH3435
19	BPH2718--BPH2799	BPH2718	BPH2799	52	FALSE	-17.6246	0.179654	456	5	BPH2718,BPH2946,BPH2798,BPH2799,BPH2800
19	BPH3523--BPH3529	BPH3523	BPH3529	44	FALSE	-50.988	0.00865801	439	4	BPH3523,BPH3527,BPH3529,BPH3739
19	BPH2926--BPH2925	BPH2926	BPH2925	4	FALSE	106.565	0.0021645	583	5	BPH2922,BPH2923,BPH2924,BPH2926,BPH2925
19	BPH2858--BPH2720	BPH2858	BPH2720	38	TRUE	-79.6552	0.0021645	677	3	BPH2720,BPH2742,BPH2858
19	BPH3258--BPH3276	BPH3258	BPH3276	118	FALSE	-26.9911	0.536797	523	4	BPH3236,BPH3258,BPH3316,BPH3276
19	BPH2729--BPH2728	BPH2729	BPH2728	6	FALSE	109.969	4.11353e-05	730	3	BPH2728,BPH2729,BPH2730
19	BPH3262--BPH3220	BPH3262	BPH3220	15	FALSE	59.703	0.0519481	511	6	BPH3208,BPH3250,BPH3220,BPH3260,BPH3306,BPH3262
19	BPH3612--BPH3602	BPH3612	BPH3602	11	FALSE	7.65837	0.309524	681	2	BPH3612,BPH3602
19	BPH3737--BPH3328	BPH3737	BPH3328	113	FALSE	-48.9779	0.699134	466	5	BPH3328,BPH3485,BPH3511,BPH3356,BPH3737
19	BPH2980--BPH2981	BPH2980	BPH2981	13	FALSE	46.9799	0.1	409	6	BPH2981,BPH2977,BPH2979,BPH2978,BPH2976,BPH2980
19	BPH2709--BPH2708	BPH2709	BPH2708	1	FALSE	-7.26096	0.420635	591	2	BPH2708,BPH2709
19	BPH3751--BPH3750	BPH3751	BPH3750	1	FALSE	113.455	0.00865801	679	2	BPH3750,BPH3751
19	BPH3368--BPH3348	BPH3368	BPH3348	65	TRUE	-56.3119	0.004329	442	3	BPH3348,BPH3735,BPH3368
19	BPH2815--BPH2813	BPH2815	BPH2813	0	FALSE	1.89264	0.792208	576	4	BPH2812,BPH2815,BPH2814,BPH2813
19	BPH2726--BPH3372	BPH2726	BPH3372	68	FALSE	-12.9644	0.0047952	421	4	BPH2726,BPH2727,BPH3376,BPH3372
19	BPH2962--BPH2964	BPH2962	BPH2964	0	FALSE	-39.886	0.0021645	596	3	BPH2962,BPH2963,BPH2964
19	BPH2778--BPH2777	BPH2778	BPH2777	0	FALSE	7.81792	0.0930736	759	2	BPH2777,BPH2778
19	BPH3437--BPH3749	BPH3437	BPH3749	4	FALSE	2.2445	0.699134	693	2	BPH3437,BPH3749
19	BPH2989--BPH2991	BPH2989	BPH2991	0	FALSE	-10.4447	0.179654	543	3	BPH2989,BPH2990,BPH2991
19	BPH3479--BPH3477	BPH3479	BPH3477	16	FALSE	-3.12279	0.792208	736	2	BPH3477,BPH3479
19	BPH2953--BPH2952	BPH2953	BPH2952	2	FALSE	-9.27368	0.177489	726	2	BPH2952,BPH2953
19	BPH2833--BPH2832	BPH2833	BPH2832	0	FALSE	-14.6894	0.025974	546	2	BPH2832,BPH2833
19	BPH3439--BPH3403	BPH3439	BPH3403	22	FALSE	55.4589	0.004329	444	10	BPH2947,BPH2948,BPH3439,BPH3453,BPH3457,BPH3431,BPH3469,BPH3403,BPH3413,BPH3499
19	BPH3508--BPH3482	BPH3508	BPH3482	8	FALSE	-19.4178	0.114286	600	2	BPH3482,BPH3508
19	BPH2961--BPH2960	BPH2961	BPH2960	0	FALSE	-0.570536	0.792208	644	2	BPH2960,BPH2961
19	BPH2763--BPH2764	BPH2763	BPH2764	29	FALSE	152.852	0.0011655	658	2	BPH2763,BPH2764
19	BPH3320--BPH3204	BPH3320	BPH3204	35	FALSE	-57.1148	1	519	4	BPH3204,BPH3226,BPH3292,BPH3320
19	BPH2988--BPH2987	BPH2988	BPH2987	0	FALSE	15.2499	0.420635	770	2	BPH2987,BPH2988
19	BPH2866--BPH2867	BPH2866	BPH2867	1	FALSE	-22.3157	0.24026	558	2	BPH2866,BPH2867
19	BPH2975--BPH2974	BPH2975	BPH2974	0	FALSE	-6.43345	0.428571	768	3	BPH2973,BPH2975,BPH2974
19	BPH2802--BPH2801	BPH2802	BPH2801	9	FALSE	-16.3863	0.141858	708	2	BPH2801,BPH2802
19	BPH3394--BPH2779	BPH3394	BPH2779	39	FALSE	-1.75762	0.662338	465	2	BPH2779,BPH3394
19	BPH2784--BPH2860	BPH2784	BPH2860	134	FALSE	114.455	0.00952381	661	2	BPH2784,BPH2860
19	BPH2825--BPH2824	BPH2825	BPH2824	0	FALSE	1.84537	0.937229	414	2	BPH2824,BPH2825
19	BPH2849--BPH2850	BPH2849	BPH2850	1	FALSE	7.89025	0.662338	645	2	BPH2849,BPH2850
19	BPH3362--BPH3366	BPH3362	BPH3366	18	FALSE	60.6017	0.0021645	415	2	BPH3362,BPH3366
19	BPH3588--BPH3584	BPH3588	BPH3584	9	FALSE	-6.1861	0.484848	705	2	BPH3584,BPH3588
19	BPH2771--BPH2770	BPH2771	BPH2770	2	FALSE	-3.1817	0.937229	739	2	BPH2770,BPH2771
19	BPH2737--BPH2738	BPH2737	BPH2738	1	FALSE	-9.31894	0.0649351	557	2	BPH2737,BPH2738
19	BPH3346--BPH3545	BPH3346	BPH3545	61	FALSE	-36.4419	0.0411255	473	3	BPH3346,BPH3443,BPH3545
19	BPH3282--BPH3274	BPH3282	BPH3274	3	TRUE	-85.2295	0.015873	648	2	BPH3274,BPH3282
19	BPH2841--BPH2840	BPH2841	BPH2840	0	FALSE	1.64172	0.484848	548	2	BPH2840,BPH2841
19	BPH3244--BPH3272	BPH3244	BPH3272	4	FALSE	-23.1565	0.132035	526	3	BPH3244,BPH3284,BPH3272
19	BPH3535--BPH3752	BPH3535	BPH3752	0	FALSE	13.9253	0.132035	472	2	BPH3535,BPH3752
19	BPH2876--BPH2877	BPH2876	BPH2877	4	FALSE	-20.6942	0.699134	656	2	BPH2876,BPH2877
19	BPH3596--BPH3628	BPH3596	BPH3628	20	FALSE	15.1389	0.329004	581	2	BPH3596,BPH3628
19	BPH3481--BPH3396	BPH3481	BPH3396	7	FALSE	13.779	0.0666667	671	2	BPH3396,BPH3481
19	BPH3336--BPH3733	BPH3336	BPH3733	2	TRUE	-115.831	0.004329	649	2	BPH3336,BPH3733
19	BPH2857--BPH2852	BPH2857	BPH2852	1	FALSE	-9.66952	0.484848	664	2	BPH2852,BPH2857
19	BPH3337--BPH3734	BPH3337	BPH3734	4	FALSE	3.64288	0.818182	532	2	BPH3337,BPH3734
19	BPH2847--BPH2783	BPH2847	BPH2783	42	FALSE	-6.23793	0.47619	684	4	BPH2783,BPH2842,BPH2843,BPH2847
19	BPH2965--BPH2966	BPH2965	BPH2966	0	FALSE	9.15242	0.24026	531	2	BPH2965,BPH2966
19	BPH2808--BPH2807	BPH2808	BPH2807	0	FALSE	6.67639	0.407867	688	2	BPH2807,BPH2808
19	BPH3746--BPH3434	BPH3746	BPH3434	0	TRUE	-29.3535	0.004329	602	2	BPH3434,BPH3746
19	BPH3548--BPH3524	BPH3548	BPH3524	0	FALSE	-39.9747	0.114286	757	2	BPH3524,BPH3548
19	BPH2898--BPH2897	BPH2898	BPH2897	0	FALSE	-2.0829	0.937229	772	2	BPH2897,BPH2898
19	BPH3389--BPH3460	BPH3389	BPH3460	0	FALSE	50.9954	0.428571	560	2	BPH3389,BPH3460
19	BPH3747--BPH3427	BPH3747	BPH3427	2	FALSE	-7.72504	0.309524	692	2	BPH3427,BPH3747
19	BPH3736--BPH3352	BPH3736	BPH3352	1	FALSE	-13.9241	0.588745	737	2	BPH3352,BPH3736
19	BPH2943--BPH2942	BPH2943	BPH2942	0	FALSE	3.36698	0.699134	636	2	BPH2942,BPH2943
19	BPH2872--BPH2873	BPH2872	BPH2873	0	FALSE	-12.0854	0.536797	646	2	BPH2872,BPH2873
19	BPH3590--BPH3568	BPH3590	BPH3568	37	FALSE	46.2301	0.017316	695	2	BPH3590,BPH3568
19	BPH2750--BPH2751	BPH2750	BPH2751	2	FALSE	-12.9316	0.588745	764	2	BPH2750,BPH2751
19	BPH3501--BPH3489	BPH3501	BPH3489	3	FALSE	-9.97263	0.125541	690	2	BPH3489,BPH3501
19	BPH2884--BPH2883	BPH2884	BPH2883	0	FALSE	-0.76274	0.84127	634	2	BPH2883,BPH2884
19	BPH3664--BPH3632	BPH3664	BPH3632	22	FALSE	-11.8277	0.699134	516	3	BPH3632,BPH3696,BPH3664
19	BPH3340--BPH3338	BPH3340	BPH3338	6	FALSE	145.303	0.0285714	740	3	BPH2792,BPH3340,BPH3338
19	BPH3216--BPH3270	BPH3216	BPH3270	2	FALSE	9.95811	0.555556	567	2	BPH3216,BPH3270
19	BPH3381--BPH3738	BPH3381	BPH3738	2	FALSE	-6.95866	0.930736	725	2	BPH3381,BPH3738
19	BPH2755--BPH2754	BPH2755	BPH2754	0	FALSE	2.77606	1	630	2	BPH2754,BPH2755
19	BPH3304--BPH3268	BPH3304	BPH3268	2	FALSE	18.7354	0.792208	662	2	BPH3268,BPH3304
19	BPH2747--BPH2748	BPH2747	BPH2748	1	FALSE	6.33616	0.662338	427	2	BPH2747,BPH2748
19	BPH2704--BPH2705	BPH2704	BPH2705	0	FALSE	36.4124	0.0151515	700	2	BPH2704,BPH2705
19	BPH2882--BPH2881	BPH2882	BPH2881	13	FALSE	-1.33085	0.914286	615	2	BPH2881,BPH2882
19	BPH2864--BPH2863	BPH2864	BPH2863	0	FALSE	-1.65592	0.937229	755	2	BPH2863,BPH2864
19	BPH2887--BPH2888	BPH2887	BPH2888	0	FALSE	2.50728	0.914286	735	2	BPH2887,BPH2888
19	BPH2861--BPH2862	BPH2861	BPH2862	1	FALSE	23.7964	0.428571	765	2	BPH2861,BPH2862
19	BPH3294--BPH3246	BPH3294	BPH3246	6	FALSE	-23.2762	0.0411255	580	2	BPH3246,BPH3294
19	BPH2752--BPH2761	BPH2752	BPH2761	0	TRUE	-43.1603	0.031746	750	2	BPH2752,BPH2761
19	BPH3462--BPH3459	BPH3462	BPH3459	1	FALSE	27.469	0.171429	628	2	BPH3459,BPH3462
19	BPH2819--BPH2820	BPH2819	BPH2820	2	FALSE	15.0066	0.24026	629	2	BPH2819,BPH2820
19	BPH2891--BPH2890	BPH2891	BPH2890	0	FALSE	-16.8054	0.150794	659	2	BPH2890,BPH2891
19	BPH2714--BPH2713	BPH2714	BPH2713	2	FALSE	-17.3353	0.177489	716	2	BPH2713,BPH2714
20	BPH2869--BPH3640	BPH2869	BPH3640	46	FALSE	-80.4756	0.004329	482	23	BPH2787,BPH3704,BPH3702,BPH3666,BPH3636,BPH3692,BPH3668,BPH3710,BPH3706,BPH3757,BPH3658,BPH3672,BPH3648,BPH3650,BPH3652,BPH3694,BPH3755,BPH3640,BPH3688,BPH3662,BPH2869,BPH3670,BPH3638
20	BPH3748--BPH3417	BPH3748	BPH3417	23	FALSE	71.6964	0.0021645	429	11	BPH3401,BPH3493,BPH3742,BPH3417,BPH3743,BPH3744,BPH3745,BPH3463,BPH3741,BPH3433,BPH3748
20	BPH3750--BPH3751	BPH3750	BPH3751	0	TRUE	-113.455	0.00865801	679	2	BPH3750,BPH3751
20	BPH3485--BPH3545	BPH3485	BPH3545	58	FALSE	27.5287	0.0822511	461	15	BPH2779,BPH3394,BPH2907,BPH3328,BPH3485,BPH3511,BPH3356,BPH3737,BPH3547,BPH3360,BPH3535,BPH3752,BPH3346,BPH3443,BPH3545
20	BPH3643--BPH3660	BPH3643	BPH3660	40	FALSE	3.14465	0.937229	504	8	BPH3643,BPH3700,BPH3674,BPH3753,BPH3682,BPH3686,BPH3660,BPH3684
20	BPH3276--BPH3316	BPH3276	BPH3316	93	FALSE	-9.72843	1	523	4	BPH3236,BPH3258,BPH3316,BPH3276
20	BPH2819--BPH2820	BPH2819	BPH2820	2	FALSE	15.0066	0.24026	629	2	BPH2819,BPH2820
20	BPH2780--BPH3382	BPH2780	BPH3382	18	FALSE	34.889	0.025974	418	4	BPH2710,BPH2780,BPH2896,BPH3382
20	BPH2800--BPH2798	BPH2800	BPH2798	0	FALSE	-13.6881	0.0540793	458	3	BPH2798,BPH2799,BPH2800
20	BPH3244--BPH3272	BPH3244	BPH3272	4	FALSE	-23.1565	0.132035	526	3	BPH3244,BPH3284,BPH3272
20	BPH2953--BPH2952	BPH2953	BPH2952	2	FALSE	-9.27368	0.177489	726	2	BPH2952,BPH2953
20	BPH2802--BPH2803	BPH2802	BPH2803	30	FALSE	-12.719	0.393939	707	3	BPH2801,BPH2802,BPH2803
20	BPH3306--BPH3262	BPH3306	BPH3262	10	FALSE	-65.1135	0.329004	511	6	BPH3208,BPH3250,BPH3220,BPH3260,BPH3306,BPH3262
20	BPH2777--BPH2778	BPH2777	BPH2778	0	FALSE	-7.81792	0.0930736	759	2	BPH2777,BPH2778
20	BPH3320--BPH3204	BPH3320	BPH3204	35	FALSE	-57.1148	1	519	4	BPH3204,BPH3226,BPH3292,BPH3320
20	BPH2959--BPH2960	BPH2959	BPH2960	0	FALSE	-12.3847	0.662338	643	3	BPH2959,BPH2960,BPH2961
20	BPH2963--BPH2964	BPH2963	BPH2964	5	TRUE	-40.5691	0.0021645	597	2	BPH2963,BPH2964
20	BPH2980--BPH2981	BPH2980	BPH2981	13	FALSE	46.9799	0.1	409	6	BPH2981,BPH2977,BPH2979,BPH2978,BPH2976,BPH2980
20	BPH2849--BPH2850	BPH2849	BPH2850	1	FALSE	7.89025	0.662338	645	2	BPH2849,BPH2850
20	BPH3274--BPH3282	BPH3274	BPH3282	1	FALSE	85.2295	0.015873	648	2	BPH3274,BPH3282
20	BPH2922--BPH2923	BPH2922	BPH2923	2	FALSE	-13.6876	0.125541	586	2	BPH2922,BPH2923
20	BPH3523--BPH3529	BPH3523	BPH3529	44	FALSE	-50.988	0.00865801	439	4	BPH3523,BPH3527,BPH3529,BPH3739
20	BPH2814--BPH2815	BPH2814	BPH2815	0	FALSE	-6.16038	0.484848	577	3	BPH2812,BPH2815,BPH2814
20	BPH2883--BPH2884	BPH2883	BPH2884	0	FALSE	0.76274	0.84127	634	2	BPH2883,BPH2884
20	BPH2832--BPH2833	BPH2832	BPH2833	0	FALSE	14.6894	0.025974	546	2	BPH2832,BPH2833
20	BPH3746--BPH3423	BPH3746	BPH3423	0	FALSE	12.572	0.257143	601	3	BPH3423,BPH3434,BPH3746
20	BPH2720--BPH2858	BPH2720	BPH2858	39	FALSE	79.6552	0.0021645	677	3	BPH2720,BPH2742,BPH2858
20	BPH2965--BPH2966	BPH2965	BPH2966	0	FALSE	9.15242	0.24026	531	2	BPH2965,BPH2966
20	BPH2705--BPH2704	BPH2705	BPH2704	0	TRUE	-36.4124	0.0151515	700	2	BPH2704,BPH2705
20	BPH3596--BPH3628	BPH3596	BPH3628	20	FALSE	15.1389	0.329004	581	2	BPH3596,BPH3628
20	BPH2867--BPH2866	BPH2867	BPH2866	2	FALSE	22.3157	0.24026	558	2	BPH2866,BPH2867
20	BPH2975--BPH2973	BPH2975	BPH2973	0	FALSE	26.6955	0.179654	769	2	BPH2973,BPH2975
20	BPH3696--BPH3664	BPH3696	BPH3664	26	FALSE	-5.47538	0.937229	516	3	BPH3632,BPH3696,BPH3664
20	BPH2843--BPH2842	BPH2843	BPH2842	0	FALSE	-7.19808	0.24026	686	2	BPH2842,BPH2843
20	BPH2897--BPH2898	BPH2897	BPH2898	0	FALSE	2.0829	0.937229	772	2	BPH2897,BPH2898
20	BPH2718--BPH2946	BPH2718	BPH2946	46	FALSE	11.3894	0.588745	457	2	BPH2718,BPH2946
20	BPH2808--BPH2807	BPH2808	BPH2807	0	FALSE	6.67639	0.407867	688	2	BPH2807,BPH2808
20	BPH2737--BPH2738	BPH2737	BPH2738	1	FALSE	-9.31894	0.0649351	557	2	BPH2737,BPH2738
20	BPH3216--BPH3270	BPH3216	BPH3270	2	FALSE	9.95811	0.555556	567	2	BPH3216,BPH3270
20	BPH3368--BPH3735	BPH3368	BPH3735	62	FALSE	-50.4856	0.0021645	442	3	BPH3348,BPH3735,BPH3368
20	BPH2948--BPH2947	BPH2948	BPH2947	0	FALSE	23.761	0.179654	448	2	BPH2947,BPH2948
20	BPH2824--BPH2825	BPH2824	BPH2825	0	FALSE	-1.84537	0.937229	414	2	BPH2824,BPH2825
20	BPH2823--BPH2763	BPH2823	BPH2763	157	FALSE	-11.6822	0.00865801	657	3	BPH2763,BPH2764,BPH2823
20	BPH2890--BPH2891	BPH2890	BPH2891	0	FALSE	16.8054	0.150794	659	2	BPH2890,BPH2891
20	BPH2877--BPH2876	BPH2877	BPH2876	4	FALSE	20.6942	0.699134	656	2	BPH2876,BPH2877
20	BPH3427--BPH3747	BPH3427	BPH3747	1	FALSE	7.72504	0.309524	692	2	BPH3427,BPH3747
20	BPH2750--BPH2751	BPH2750	BPH2751	2	FALSE	-12.9316	0.588745	764	2	BPH2750,BPH2751
20	BPH2989--BPH2991	BPH2989	BPH2991	0	FALSE	-10.4447	0.179654	543	3	BPH2989,BPH2990,BPH2991
20	BPH3362--BPH3366	BPH3362	BPH3366	18	FALSE	60.6017	0.0021645	415	2	BPH3362,BPH3366
20	BPH3403--BPH3413	BPH3403	BPH3413	3	FALSE	2.20539	1	452	2	BPH3403,BPH3413
20	BPH3381--BPH3738	BPH3381	BPH3738	2	FALSE	-6.95866	0.930736	725	2	BPH3381,BPH3738
20	BPH3489--BPH3501	BPH3489	BPH3501	2	FALSE	9.97263	0.125541	690	2	BPH3489,BPH3501
20	BPH3304--BPH3268	BPH3304	BPH3268	2	FALSE	18.7354	0.792208	662	2	BPH3268,BPH3304
20	BPH3457--BPH3439	BPH3457	BPH3439	14	FALSE	-3.59932	0.662338	449	3	BPH3439,BPH3453,BPH3457
20	BPH3588--BPH3584	BPH3588	BPH3584	9	FALSE	-6.1861	0.484848	705	2	BPH3584,BPH3588
20	BPH3459--BPH3462	BPH3459	BPH3462	2	FALSE	-27.469	0.171429	628	2	BPH3459,BPH3462
20	BPH2841--BPH2840	BPH2841	BPH2840	0	FALSE	1.64172	0.484848	548	2	BPH2840,BPH2841
20	BPH2747--BPH2748	BPH2747	BPH2748	1	FALSE	6.33616	0.662338	427	2	BPH2747,BPH2748
20	BPH2726--BPH3376	BPH2726	BPH3376	33	FALSE	26.1251	0.035964	422	3	BPH2726,BPH2727,BPH3376
20	BPH3524--BPH3548	BPH3524	BPH3548	1	FALSE	39.9747	0.114286	757	2	BPH3524,BPH3548
20	BPH2987--BPH2988	BPH2987	BPH2988	0	FALSE	-15.2499	0.420635	770	2	BPH2987,BPH2988
20	BPH2873--BPH2872	BPH2873	BPH2872	0	FALSE	12.0854	0.536797	646	2	BPH2872,BPH2873
20	BPH3481--BPH3396	BPH3481	BPH3396	7	FALSE	13.779	0.0666667	671	2	BPH3396,BPH3481
20	BPH3460--BPH3389	BPH3460	BPH3389	1	FALSE	-50.9954	0.428571	560	2	BPH3389,BPH3460
20	BPH3508--BPH3482	BPH3508	BPH3482	8	FALSE	-19.4178	0.114286	600	2	BPH3482,BPH3508
20	BPH2752--BPH2761	BPH2752	BPH2761	0	TRUE	-43.1603	0.031746	750	2	BPH2752,BPH2761
20	BPH3734--BPH3337	BPH3734	BPH3337	3	FALSE	-3.64288	0.818182	532	2	BPH3337,BPH3734
20	BPH2730--BPH2729	BPH2730	BPH2729	5	FALSE	-116.568	4.11353e-05	731	2	BPH2729,BPH2730
20	BPH2864--BPH2863	BPH2864	BPH2863	0	FALSE	-1.65592	0.937229	755	2	BPH2863,BPH2864
20	BPH2942--BPH2943	BPH2942	BPH2943	0	FALSE	-3.36698	0.699134	636	2	BPH2942,BPH2943
20	BPH3602--BPH3612	BPH3602	BPH3612	10	FALSE	-7.65837	0.309524	681	2	BPH3612,BPH3602
20	BPH2888--BPH2887	BPH2888	BPH2887	0	FALSE	-2.50728	0.914286	735	2	BPH2887,BPH2888
20	BPH2771--BPH2770	BPH2771	BPH2770	2	FALSE	-3.1817	0.937229	739	2	BPH2770,BPH2771
20	BPH3338--BPH3340	BPH3338	BPH3340	7	FALSE	-145.303	0.0285714	740	3	BPH2792,BPH3340,BPH3338
20	BPH3437--BPH3749	BPH3437	BPH3749	4	FALSE	2.2445	0.699134	693	2	BPH3437,BPH3749
20	BPH2784--BPH2860	BPH2784	BPH2860	134	FALSE	114.455	0.00952381	661	2	BPH2784,BPH2860
20	BPH3294--BPH3246	BPH3294	BPH3246	6	FALSE	-23.2762	0.0411255	580	2	BPH3246,BPH3294
20	BPH3352--BPH3736	BPH3352	BPH3736	2	FALSE	13.9241	0.588745	737	2	BPH3352,BPH3736
20	BPH2881--BPH2882	BPH2881	BPH2882	12	FALSE	1.33085	0.914286	615	2	BPH2881,BPH2882
20	BPH3477--BPH3479	BPH3477	BPH3479	15	FALSE	3.12279	0.792208	736	2	BPH3477,BPH3479
20	BPH3568--BPH3590	BPH3568	BPH3590	37	TRUE	-46.2301	0.017316	695	2	BPH3590,BPH3568
20	BPH2754--BPH2755	BPH2754	BPH2755	0	FALSE	-2.77606	1	630	2	BPH2754,BPH2755
20	BPH2709--BPH2708	BPH2709	BPH2708	1	FALSE	-7.26096	0.420635	591	2	BPH2708,BPH2709
20	BPH2861--BPH2862	BPH2861	BPH2862	1	FALSE	23.7964	0.428571	765	2	BPH2861,BPH2862
20	BPH2714--BPH2713	BPH2714	BPH2713	2	FALSE	-17.3353	0.177489	716	2	BPH2713,BPH2714
20	BPH3336--BPH3733	BPH3336	BPH3733	2	TRUE	-115.831	0.004329	649	2	BPH3336,BPH3733
20	BPH2857--BPH2852	BPH2857	BPH2852	1	FALSE	-9.66952	0.484848	664	2	BPH2852,BPH2857
21	BPH3202--BPH3636	BPH3202	BPH3636	46	FALSE	10.4662	0.84127	481	24	BPH2787,BPH3704,BPH3702,BPH3666,BPH3636,BPH3692,BPH3668,BPH3710,BPH3706,BPH3757,BPH3658,BPH3672,BPH3648,BPH3650,BPH3652,BPH3694,BPH3755,BPH3640,BPH3688,BPH3662,BPH2869,BPH3670,BPH3638,BPH3202
21	BPH3493--BPH3529	BPH3493	BPH3529	76	FALSE	-34.5135	0.00865801	428	15	BPH3401,BPH3493,BPH3742,BPH3417,BPH3743,BPH3744,BPH3745,BPH3463,BPH3741,BPH3433,BPH3748,BPH3523,BPH3527,BPH3529,BPH3739
21	BPH2783--BPH2847	BPH2783	BPH2847	33	FALSE	6.23793	0.47619	684	4	BPH2783,BPH2842,BPH2843,BPH2847
21	BPH3362--BPH3376	BPH3362	BPH3376	66	FALSE	33.243	0.025974	404	21	BPH2710,BPH2780,BPH2896,BPH3382,BPH3435,BPH2726,BPH2727,BPH3376,BPH3372,BPH3362,BPH3366,BPH2824,BPH2825,BPH2781,BPH2982,BPH2981,BPH2977,BPH2979,BPH2978,BPH2976,BPH2980
21	BPH3473--BPH3545	BPH3473	BPH3545	66	FALSE	9.4373	0.329004	460	16	BPH2779,BPH3394,BPH2907,BPH3328,BPH3485,BPH3511,BPH3356,BPH3737,BPH3547,BPH3360,BPH3535,BPH3752,BPH3346,BPH3443,BPH3545,BPH3473
21	BPH3431--BPH3403	BPH3431	BPH3403	70	FALSE	24.4388	0.0822511	444	10	BPH2947,BPH2948,BPH3439,BPH3453,BPH3457,BPH3431,BPH3469,BPH3403,BPH3413,BPH3499
21	BPH3284--BPH3244	BPH3284	BPH3244	5	FALSE	3.35133	0.792208	527	2	BPH3244,BPH3284
21	BPH2973--BPH2974	BPH2973	BPH2974	0	FALSE	-33.1289	0.0519481	768	3	BPH2973,BPH2975,BPH2974
21	BPH3208--BPH3250	BPH3208	BPH3250	2	FALSE	24.0497	0.125541	514	2	BPH3208,BPH3250
21	BPH3674--BPH3700	BPH3674	BPH3700	31	FALSE	40.4902	0.0519481	506	4	BPH3643,BPH3700,BPH3674,BPH3753
21	BPH2832--BPH2833	BPH2832	BPH2833	0	FALSE	14.6894	0.025974	546	2	BPH2832,BPH2833
21	BPH2925--BPH2922	BPH2925	BPH2922	3	FALSE	-86.8266	0.004329	583	5	BPH2922,BPH2923,BPH2924,BPH2926,BPH2925
21	BPH2763--BPH2764	BPH2763	BPH2764	29	FALSE	152.852	0.0011655	658	2	BPH2763,BPH2764
21	BPH2840--BPH2841	BPH2840	BPH2841	0	FALSE	-1.64172	0.484848	548	2	BPH2840,BPH2841
21	BPH3590--BPH3568	BPH3590	BPH3568	37	FALSE	46.2301	0.017316	695	2	BPH3590,BPH3568
21	BPH3236--BPH3258	BPH3236	BPH3258	0	FALSE	-9.1088	1	525	2	BPH3236,BPH3258
21	BPH3684--BPH3660	BPH3684	BPH3660	52	FALSE	2.24833	0.818182	510	2	BPH3660,BPH3684
21	BPH2867--BPH2866	BPH2867	BPH2866	2	FALSE	22.3157	0.24026	558	2	BPH2866,BPH2867
21	BPH2965--BPH2966	BPH2965	BPH2966	0	FALSE	9.15242	0.24026	531	2	BPH2965,BPH2966
21	BPH3204--BPH3226	BPH3204	BPH3226	6	FALSE	30.7573	0.730159	520	3	BPH3204,BPH3226,BPH3292
21	BPH2808--BPH2807	BPH2808	BPH2807	0	FALSE	6.67639	0.407867	688	2	BPH2807,BPH2808
21	BPH2718--BPH2799	BPH2718	BPH2799	52	FALSE	-17.6246	0.179654	456	5	BPH2718,BPH2946,BPH2798,BPH2799,BPH2800
21	BPH3340--BPH3338	BPH3340	BPH3338	6	FALSE	145.303	0.0285714	740	3	BPH2792,BPH3340,BPH3338
21	BPH3628--BPH3596	BPH3628	BPH3596	21	FALSE	-15.1389	0.329004	581	2	BPH3596,BPH3628
21	BPH3437--BPH3749	BPH3437	BPH3749	4	FALSE	2.2445	0.699134	693	2	BPH3437,BPH3749
21	BPH2858--BPH2720	BPH2858	BPH2720	38	TRUE	-79.6552	0.0021645	677	3	BPH2720,BPH2742,BPH2858
21	BPH2801--BPH2802	BPH2801	BPH2802	9	FALSE	16.3863	0.141858	708	2	BPH2801,BPH2802
21	BPH2883--BPH2884	BPH2883	BPH2884	0	FALSE	0.76274	0.84127	634	2	BPH2883,BPH2884
21	BPH2815--BPH2812	BPH2815	BPH2812	0	FALSE	2.00875	0.937229	578	2	BPH2812,BPH2815
21	BPH2960--BPH2961	BPH2960	BPH2961	0	FALSE	0.570536	0.792208	644	2	BPH2960,BPH2961
21	BPH3584--BPH3588	BPH3584	BPH3588	9	FALSE	6.1861	0.484848	705	2	BPH3584,BPH3588
21	BPH3686--BPH3682	BPH3686	BPH3682	27	FALSE	59.3991	0.00865801	509	2	BPH3682,BPH3686
21	BPH2761--BPH2752	BPH2761	BPH2752	0	FALSE	43.1603	0.031746	750	2	BPH2752,BPH2761
21	BPH3306--BPH3260	BPH3306	BPH3260	2	FALSE	-29.9898	0.393939	515	2	BPH3260,BPH3306
21	BPH2748--BPH2747	BPH2748	BPH2747	2	FALSE	-6.33616	0.662338	427	2	BPH2747,BPH2748
21	BPH2700--BPH2876	BPH2700	BPH2876	139	FALSE	37.4043	0.179654	655	3	BPH2700,BPH2876,BPH2877
21	BPH3270--BPH3216	BPH3270	BPH3216	2	FALSE	-9.95811	0.555556	567	2	BPH3216,BPH3270
21	BPH2882--BPH2881	BPH2882	BPH2881	13	FALSE	-1.33085	0.914286	615	2	BPH2881,BPH2882
21	BPH3489--BPH3501	BPH3489	BPH3501	2	FALSE	9.97263	0.125541	690	2	BPH3489,BPH3501
21	BPH3479--BPH3477	BPH3479	BPH3477	16	FALSE	-3.12279	0.792208	736	2	BPH3477,BPH3479
21	BPH2990--BPH2989	BPH2990	BPH2989	0	FALSE	12.2099	0.0649351	543	3	BPH2989,BPH2990,BPH2991
21	BPH2888--BPH2887	BPH2888	BPH2887	0	FALSE	-2.50728	0.914286	735	2	BPH2887,BPH2888
21	BPH2890--BPH2891	BPH2890	BPH2891	0	FALSE	16.8054	0.150794	659	2	BPH2890,BPH2891
21	BPH3750--BPH3751	BPH3750	BPH3751	0	TRUE	-113.455	0.00865801	679	2	BPH3750,BPH3751
21	BPH3389--BPH3460	BPH3389	BPH3460	0	FALSE	50.9954	0.428571	560	2	BPH3389,BPH3460
21	BPH2849--BPH2850	BPH2849	BPH2850	1	FALSE	7.89025	0.662338	645	2	BPH2849,BPH2850
21	BPH3268--BPH3304	BPH3268	BPH3304	2	FALSE	-18.7354	0.792208	662	2	BPH3268,BPH3304
21	BPH3696--BPH3632	BPH3696	BPH3632	2	FALSE	-17.3031	0.309524	517	2	BPH3632,BPH3696
21	BPH2897--BPH2898	BPH2897	BPH2898	0	FALSE	2.0829	0.937229	772	2	BPH2897,BPH2898
21	BPH2714--BPH2713	BPH2714	BPH2713	2	FALSE	-17.3353	0.177489	716	2	BPH2713,BPH2714
21	BPH3434--BPH3746	BPH3434	BPH3746	0	FALSE	29.3535	0.004329	602	2	BPH3434,BPH3746
21	BPH3352--BPH3736	BPH3352	BPH3736	2	FALSE	13.9241	0.588745	737	2	BPH3352,BPH3736
21	BPH2860--BPH2784	BPH2860	BPH2784	147	TRUE	-114.455	0.00952381	661	2	BPH2784,BPH2860
21	BPH3735--BPH3368	BPH3735	BPH3368	59	FALSE	50.4856	0.0021645	442	3	BPH3348,BPH3735,BPH3368
21	BPH3548--BPH3524	BPH3548	BPH3524	0	FALSE	-39.9747	0.114286	757	2	BPH3524,BPH3548
21	BPH3294--BPH3246	BPH3294	BPH3246	6	FALSE	-23.2762	0.0411255	580	2	BPH3246,BPH3294
21	BPH3602--BPH3612	BPH3602	BPH3612	10	FALSE	-7.65837	0.309524	681	2	BPH3612,BPH3602
21	BPH2737--BPH2738	BPH2737	BPH2738	1	FALSE	-9.31894	0.0649351	557	2	BPH2737,BPH2738
21	BPH2864--BPH2863	BPH2864	BPH2863	0	FALSE	-1.65592	0.937229	755	2	BPH2863,BPH2864
21	BPH2750--BPH2751	BPH2750	BPH2751	2	FALSE	-12.9316	0.588745	764	2	BPH2750,BPH2751
21	BPH2820--BPH2819	BPH2820	BPH2819	2	FALSE	-15.0066	0.24026	629	2	BPH2819,BPH2820
21	BPH2770--BPH2771	BPH2770	BPH2771	2	FALSE	3.1817	0.937229	739	2	BPH2770,BPH2771
21	BPH2709--BPH2708	BPH2709	BPH2708	1	FALSE	-7.26096	0.420635	591	2	BPH2708,BPH2709
21	BPH2778--BPH2777	BPH2778	BPH2777	0	FALSE	7.81792	0.0930736	759	2	BPH2777,BPH2778
21	BPH2729--BPH2730	BPH2729	BPH2730	6	FALSE	116.568	4.11353e-05	731	2	BPH2729,BPH2730
21	BPH2953--BPH2952	BPH2953	BPH2952	2	FALSE	-9.27368	0.177489	726	2	BPH2952,BPH2953
21	BPH3282--BPH3274	BPH3282	BPH3274	3	TRUE	-85.2295	0.015873	648	2	BPH3274,BPH3282
21	BPH3733--BPH3336	BPH3733	BPH3336	2	FALSE	115.831	0.004329	649	2	BPH3336,BPH3733
21	BPH3337--BPH3734	BPH3337	BPH3734	4	FALSE	3.64288	0.818182	532	2	BPH3337,BPH3734
21	BPH2943--BPH2942	BPH2943	BPH2942	0	FALSE	3.36698	0.699134	636	2	BPH2942,BPH2943
21	BPH2873--BPH2872	BPH2873	BPH2872	0	FALSE	12.0854	0.536797	646	2	BPH2872,BPH2873
21	BPH3462--BPH3459	BPH3462	BPH3459	1	FALSE	27.469	0.171429	628	2	BPH3459,BPH3462
21	BPH3396--BPH3481	BPH3396	BPH3481	7	FALSE	-13.779	0.0666667	671	2	BPH3396,BPH3481
21	BPH2861--BPH2862	BPH2861	BPH2862	1	FALSE	23.7964	0.428571	765	2	BPH2861,BPH2862
21	BPH2704--BPH2705	BPH2704	BPH2705	0	FALSE	36.4124	0.0151515	700	2	BPH2704,BPH2705
21	BPH2987--BPH2988	BPH2987	BPH2988	0	FALSE	-15.2499	0.420635	770	2	BPH2987,BPH2988
21	BPH2754--BPH2755	BPH2754	BPH2755	0	FALSE	-2.77606	1	630	2	BPH2754,BPH2755
21	BPH2964--BPH2962	BPH2964	BPH2962	0	FALSE	39.886	0.0021645	596	3	BPH2962,BPH2963,BPH2964
21	BPH3381--BPH3738	BPH3381	BPH3738	2	FALSE	-6.95866	0.930736	725	2	BPH3381,BPH3738
21	BPH3482--BPH3508	BPH3482	BPH3508	8	FALSE	19.4178	0.114286	600	2	BPH3482,BPH3508
21	BPH3747--BPH3427	BPH3747	BPH3427	2	FALSE	-7.72504	0.309524	692	2	BPH3427,BPH3747
21	BPH2852--BPH2857	BPH2852	BPH2857	1	FALSE	9.66952	0.484848	664	2	BPH2852,BPH2857
22	BPH3686--BPH3755	BPH3686	BPH3755	51	FALSE	27.8262	0.352381	480	32	BPH2787,BPH3704,BPH3702,BPH3666,BPH3636,BPH3692,BPH3668,BPH3710,BPH3706,BPH3757,BPH3658,BPH3672,BPH3648,BPH3650,BPH3652,BPH3694,BPH3755,BPH3640,BPH3688,BPH3662,BPH2869,BPH3670,BPH3638,BPH3202,BPH3643,BPH3700,BPH3674,BPH3753,BPH3682,BPH3686,BPH3660,BPH3684
22	BPH2981--BPH2979	BPH2981	BPH2979	12	FALSE	-12.4397	1	409	6	BPH2981,BPH2977,BPH2979,BPH2978,BPH2976,BPH2980
22	BPH3443--BPH3547	BPH3443	BPH3547	53	FALSE	61.5993	0.017316	461	15	BPH2779,BPH3394,BPH2907,BPH3328,BPH3485,BPH3511,BPH3356,BPH3737,BPH3547,BPH3360,BPH3535,BPH3752,BPH3346,BPH3443,BPH3545
22	BPH3745--BPH3744	BPH3745	BPH3744	1	FALSE	2.5682	0.699134	435	4	BPH3417,BPH3743,BPH3744,BPH3745
22	BPH2948--BPH2947	BPH2948	BPH2947	0	FALSE	23.761	0.179654	448	2	BPH2947,BPH2948
22	BPH3738--BPH3381	BPH3738	BPH3381	1	FALSE	6.95866	0.930736	725	2	BPH3381,BPH3738
22	BPH3340--BPH3338	BPH3340	BPH3338	6	FALSE	145.303	0.0285714	740	3	BPH2792,BPH3340,BPH3338
22	BPH3352--BPH3736	BPH3352	BPH3736	2	FALSE	13.9241	0.588745	737	2	BPH3352,BPH3736
22	BPH3499--BPH3403	BPH3499	BPH3403	23	FALSE	66.5886	0.004329	451	3	BPH3403,BPH3413,BPH3499
22	BPH3523--BPH3529	BPH3523	BPH3529	44	FALSE	-50.988	0.00865801	439	4	BPH3523,BPH3527,BPH3529,BPH3739
22	BPH2942--BPH2943	BPH2942	BPH2943	0	FALSE	-3.36698	0.699134	636	2	BPH2942,BPH2943
22	BPH2923--BPH2924	BPH2923	BPH2924	3	FALSE	117.815	0.0021645	585	3	BPH2922,BPH2923,BPH2924
22	BPH3320--BPH3292	BPH3320	BPH3292	40	FALSE	-23.4596	0.792208	519	4	BPH3204,BPH3226,BPH3292,BPH3320
22	BPH2989--BPH2990	BPH2989	BPH2990	0	FALSE	-12.2099	0.0649351	543	3	BPH2989,BPH2990,BPH2991
22	BPH2754--BPH2755	BPH2754	BPH2755	0	FALSE	-2.77606	1	630	2	BPH2754,BPH2755
22	BPH2780--BPH2710	BPH2780	BPH2710	47	FALSE	-31.6049	0.00865801	419	3	BPH2710,BPH2780,BPH2896
22	BPH3453--BPH3457	BPH3453	BPH3457	5	FALSE	-29.1325	0.0822511	450	2	BPH3453,BPH3457
22	BPH2763--BPH2764	BPH2763	BPH2764	29	FALSE	152.852	0.0011655	658	2	BPH2763,BPH2764
22	BPH2887--BPH2888	BPH2887	BPH2888	0	FALSE	2.50728	0.914286	735	2	BPH2887,BPH2888
22	BPH2831--BPH2833	BPH2831	BPH2833	0	FALSE	13.5635	0.0519481	545	3	BPH2831,BPH2832,BPH2833
22	BPH2961--BPH2959	BPH2961	BPH2959	0	FALSE	11.8141	0.588745	643	3	BPH2959,BPH2960,BPH2961
22	BPH2946--BPH2800	BPH2946	BPH2800	57	FALSE	-18.4131	0.0812521	456	5	BPH2718,BPH2946,BPH2798,BPH2799,BPH2800
22	BPH3751--BPH2858	BPH3751	BPH2858	35	FALSE	64.6254	0.0021645	676	5	BPH2720,BPH2742,BPH2858,BPH3750,BPH3751
22	BPH2802--BPH2803	BPH2802	BPH2803	30	FALSE	-12.719	0.393939	707	3	BPH2801,BPH2802,BPH2803
22	BPH3250--BPH3220	BPH3250	BPH3220	6	FALSE	17.2582	0.536797	513	3	BPH3208,BPH3250,BPH3220
22	BPH3284--BPH3272	BPH3284	BPH3272	9	FALSE	-19.8051	0.246753	526	3	BPH3244,BPH3284,BPH3272
22	BPH2825--BPH2824	BPH2825	BPH2824	0	FALSE	1.84537	0.937229	414	2	BPH2824,BPH2825
22	BPH3260--BPH3306	BPH3260	BPH3306	2	FALSE	29.9898	0.393939	515	2	BPH3260,BPH3306
22	BPH3423--BPH3746	BPH3423	BPH3746	0	FALSE	-12.572	0.257143	601	3	BPH3423,BPH3434,BPH3746
22	BPH2860--BPH2784	BPH2860	BPH2784	147	TRUE	-114.455	0.00952381	661	2	BPH2784,BPH2860
22	BPH2975--BPH2973	BPH2975	BPH2973	0	FALSE	26.6955	0.179654	769	2	BPH2973,BPH2975
22	BPH2713--BPH2714	BPH2713	BPH2714	2	FALSE	17.3353	0.177489	716	2	BPH2713,BPH2714
22	BPH3628--BPH3596	BPH3628	BPH3596	21	FALSE	-15.1389	0.329004	581	2	BPH3596,BPH3628
22	BPH2727--BPH3376	BPH2727	BPH3376	31	FALSE	13.1369	0.413586	422	3	BPH2726,BPH2727,BPH3376
22	BPH2812--BPH2815	BPH2812	BPH2815	0	FALSE	-2.00875	0.937229	578	2	BPH2812,BPH2815
22	BPH3508--BPH3482	BPH3508	BPH3482	8	FALSE	-19.4178	0.114286	600	2	BPH3482,BPH3508
22	BPH3459--BPH3462	BPH3459	BPH3462	2	FALSE	-27.469	0.171429	628	2	BPH3459,BPH3462
22	BPH2966--BPH2965	BPH2966	BPH2965	0	FALSE	-9.15242	0.24026	531	2	BPH2965,BPH2966
22	BPH2962--BPH2964	BPH2962	BPH2964	0	FALSE	-39.886	0.0021645	596	3	BPH2962,BPH2963,BPH2964
22	BPH2852--BPH2857	BPH2852	BPH2857	1	FALSE	9.66952	0.484848	664	2	BPH2852,BPH2857
22	BPH3747--BPH3427	BPH3747	BPH3427	2	FALSE	-7.72504	0.309524	692	2	BPH3427,BPH3747
22	BPH3584--BPH3588	BPH3584	BPH3588	9	FALSE	6.1861	0.484848	705	2	BPH3584,BPH3588
22	BPH2771--BPH2770	BPH2771	BPH2770	2	FALSE	-3.1817	0.937229	739	2	BPH2770,BPH2771
22	BPH2704--BPH2705	BPH2704	BPH2705	0	FALSE	36.4124	0.0151515	700	2	BPH2704,BPH2705
22	BPH2783--BPH2847	BPH2783	BPH2847	33	FALSE	6.23793	0.47619	684	4	BPH2783,BPH2842,BPH2843,BPH2847
22	BPH3216--BPH3270	BPH3216	BPH3270	2	FALSE	9.95811	0.555556	567	2	BPH3216,BPH3270
22	BPH2748--BPH2747	BPH2748	BPH2747	2	FALSE	-6.33616	0.662338	427	2	BPH2747,BPH2748
22	BPH3316--BPH3236	BPH3316	BPH3236	99	FALSE	45.8284	0.309524	524	3	BPH3236,BPH3258,BPH3316
22	BPH3501--BPH3489	BPH3501	BPH3489	3	FALSE	-9.97263	0.125541	690	2	BPH3489,BPH3501
22	BPH2729--BPH2728	BPH2729	BPH2728	6	FALSE	109.969	4.11353e-05	730	3	BPH2728,BPH2729,BPH2730
22	BPH2898--BPH2897	BPH2898	BPH2897	0	FALSE	-2.0829	0.937229	772	2	BPH2897,BPH2898
22	BPH2808--BPH2807	BPH2808	BPH2807	0	FALSE	6.67639	0.407867	688	2	BPH2807,BPH2808
22	BPH3460--BPH3389	BPH3460	BPH3389	1	FALSE	-50.9954	0.428571	560	2	BPH3389,BPH3460
22	BPH2761--BPH2752	BPH2761	BPH2752	0	FALSE	43.1603	0.031746	750	2	BPH2752,BPH2761
22	BPH2737--BPH2738	BPH2737	BPH2738	1	FALSE	-9.31894	0.0649351	557	2	BPH2737,BPH2738
22	BPH2876--BPH2877	BPH2876	BPH2877	4	FALSE	-20.6942	0.699134	656	2	BPH2876,BPH2877
22	BPH2819--BPH2820	BPH2819	BPH2820	2	FALSE	15.0066	0.24026	629	2	BPH2819,BPH2820
22	BPH3749--BPH3437	BPH3749	BPH3437	4	FALSE	-2.2445	0.699134	693	2	BPH3437,BPH3749
22	BPH3664--BPH3696	BPH3664	BPH3696	24	FALSE	5.47538	0.937229	516	3	BPH3632,BPH3696,BPH3664
22	BPH3294--BPH3246	BPH3294	BPH3246	6	FALSE	-23.2762	0.0411255	580	2	BPH3246,BPH3294
22	BPH3748--BPH3433	BPH3748	BPH3433	0	FALSE	26.3053	0.00952381	438	2	BPH3433,BPH3748
22	BPH2850--BPH2849	BPH2850	BPH2849	1	FALSE	-7.89025	0.662338	645	2	BPH2849,BPH2850
22	BPH2863--BPH2864	BPH2863	BPH2864	0	FALSE	1.65592	0.937229	755	2	BPH2863,BPH2864
22	BPH3734--BPH3337	BPH3734	BPH3337	3	FALSE	-3.64288	0.818182	532	2	BPH3337,BPH3734
22	BPH2988--BPH2987	BPH2988	BPH2987	0	FALSE	15.2499	0.420635	770	2	BPH2987,BPH2988
22	BPH3602--BPH3612	BPH3602	BPH3612	10	FALSE	-7.65837	0.309524	681	2	BPH3612,BPH3602
22	BPH3524--BPH3548	BPH3524	BPH3548	1	FALSE	39.9747	0.114286	757	2	BPH3524,BPH3548
22	BPH2708--BPH2709	BPH2708	BPH2709	0	FALSE	7.26096	0.420635	591	2	BPH2708,BPH2709
22	BPH2777--BPH2778	BPH2777	BPH2778	0	FALSE	-7.81792	0.0930736	759	2	BPH2777,BPH2778
22	BPH2861--BPH2862	BPH2861	BPH2862	1	FALSE	23.7964	0.428571	765	2	BPH2861,BPH2862
22	BPH2751--BPH2750	BPH2751	BPH2750	1	FALSE	12.9316	0.588745	764	2	BPH2750,BPH2751
22	BPH2866--BPH2867	BPH2866	BPH2867	1	FALSE	-22.3157	0.24026	558	2	BPH2866,BPH2867
22	BPH3479--BPH3477	BPH3479	BPH3477	16	FALSE	-3.12279	0.792208	736	2	BPH3477,BPH3479
22	BPH3368--BPH3348	BPH3368	BPH3348	65	TRUE	-56.3119	0.004329	442	3	BPH3348,BPH3735,BPH3368
22	BPH2952--BPH2953	BPH2952	BPH2953	2	FALSE	9.27368	0.177489	726	2	BPH2952,BPH2953
22	BPH2881--BPH2882	BPH2881	BPH2882	12	FALSE	1.33085	0.914286	615	2	BPH2881,BPH2882
22	BPH3304--BPH3268	BPH3304	BPH3268	2	FALSE	18.7354	0.792208	662	2	BPH3268,BPH3304
22	BPH3362--BPH3366	BPH3362	BPH3366	18	FALSE	60.6017	0.0021645	415	2	BPH3362,BPH3366
22	BPH3493--BPH3742	BPH3493	BPH3742	0	FALSE	56.0616	0.004329	432	2	BPH3493,BPH3742
22	BPH2840--BPH2841	BPH2840	BPH2841	0	FALSE	-1.64172	0.484848	548	2	BPH2840,BPH2841
22	BPH3396--BPH3481	BPH3396	BPH3481	7	FALSE	-13.779	0.0666667	671	2	BPH3396,BPH3481
22	BPH3568--BPH3590	BPH3568	BPH3590	37	TRUE	-46.2301	0.017316	695	2	BPH3590,BPH3568
22	BPH2890--BPH2891	BPH2890	BPH2891	0	FALSE	16.8054	0.150794	659	2	BPH2890,BPH2891
22	BPH3336--BPH3733	BPH3336	BPH3733	2	TRUE	-115.831	0.004329	649	2	BPH3336,BPH3733
22	BPH2872--BPH2873	BPH2872	BPH2873	0	FALSE	-12.0854	0.536797	646	2	BPH2872,BPH2873
22	BPH3274--BPH3282	BPH3274	BPH3282	1	FALSE	85.2295	0.015873	648	2	BPH3274,BPH3282
22	BPH2884--BPH2883	BPH2884	BPH2883	0	FALSE	-0.76274	0.84127	634	2	BPH2883,BPH2884
23	BPH3638--BPH3668	BPH3638	BPH3668	22	FALSE	-43.3459	0.179654	482	23	BPH2787,BPH3704,BPH3702,BPH3666,BPH3636,BPH3692,BPH3668,BPH3710,BPH3706,BPH3757,BPH3658,BPH3672,BPH3648,BPH3650,BPH3652,BPH3694,BPH3755,BPH3640,BPH3688,BPH3662,BPH2869,BPH3670,BPH3638
23	BPH2978--BPH2982	BPH2978	BPH2982	17	FALSE	-37.1129	0.1	408	7	BPH2982,BPH2981,BPH2977,BPH2979,BPH2978,BPH2976,BPH2980
23	BPH3382--BPH2896	BPH3382	BPH2896	19	FALSE	-15.3458	0.699134	418	4	BPH2710,BPH2780,BPH2896,BPH3382
23	BPH3741--BPH3745	BPH3741	BPH3745	4	FALSE	19.1936	0.025974	433	6	BPH3417,BPH3743,BPH3744,BPH3745,BPH3463,BPH3741
23	BPH2858--BPH3751	BPH2858	BPH3751	36	FALSE	-64.6254	0.0021645	676	5	BPH2720,BPH2742,BPH2858,BPH3750,BPH3751
23	BPH2852--BPH2857	BPH2852	BPH2857	1	FALSE	9.66952	0.484848	664	2	BPH2852,BPH2857
23	BPH3660--BPH3753	BPH3660	BPH3753	43	FALSE	25.6819	0.428571	504	8	BPH3643,BPH3700,BPH3674,BPH3753,BPH3682,BPH3686,BPH3660,BPH3684
23	BPH2882--BPH2881	BPH2882	BPH2881	13	FALSE	-1.33085	0.914286	615	2	BPH2881,BPH2882
23	BPH3473--BPH3545	BPH3473	BPH3545	66	FALSE	9.4373	0.329004	460	16	BPH2779,BPH3394,BPH2907,BPH3328,BPH3485,BPH3511,BPH3356,BPH3737,BPH3547,BPH3360,BPH3535,BPH3752,BPH3346,BPH3443,BPH3545,BPH3473
23	BPH3306--BPH3220	BPH3306	BPH3220	7	FALSE	-5.41048	0.937229	512	5	BPH3208,BPH3250,BPH3220,BPH3260,BPH3306
23	BPH3320--BPH3204	BPH3320	BPH3204	35	FALSE	-57.1148	1	519	4	BPH3204,BPH3226,BPH3292,BPH3320
23	BPH2800--BPH2799	BPH2800	BPH2799	0	FALSE	-10.6009	0.490842	459	2	BPH2799,BPH2800
23	BPH2925--BPH2924	BPH2925	BPH2924	0	FALSE	17.3007	0.179654	583	5	BPH2922,BPH2923,BPH2924,BPH2926,BPH2925
23	BPH3362--BPH3366	BPH3362	BPH3366	18	FALSE	60.6017	0.0021645	415	2	BPH3362,BPH3366
23	BPH2777--BPH2778	BPH2777	BPH2778	0	FALSE	-7.81792	0.0930736	759	2	BPH2777,BPH2778
23	BPH3340--BPH3338	BPH3340	BPH3338	6	FALSE	145.303	0.0285714	740	3	BPH2792,BPH3340,BPH3338
23	BPH2991--BPH2990	BPH2991	BPH2990	0	FALSE	-1.76518	0.588745	544	2	BPH2990,BPH2991
23	BPH3258--BPH3276	BPH3258	BPH3276	118	FALSE	-26.9911	0.536797	523	4	BPH3236,BPH3258,BPH3316,BPH3276
23	BPH2814--BPH2812	BPH2814	BPH2812	0	FALSE	-4.15163	0.937229	577	3	BPH2812,BPH2815,BPH2814
23	BPH2876--BPH2877	BPH2876	BPH2877	4	FALSE	-20.6942	0.699134	656	2	BPH2876,BPH2877
23	BPH2752--BPH2761	BPH2752	BPH2761	0	TRUE	-43.1603	0.031746	750	2	BPH2752,BPH2761
23	BPH3664--BPH3632	BPH3664	BPH3632	22	FALSE	-11.8277	0.699134	516	3	BPH3632,BPH3696,BPH3664
23	BPH2820--BPH2819	BPH2820	BPH2819	2	FALSE	-15.0066	0.24026	629	2	BPH2819,BPH2820
23	BPH3747--BPH3427	BPH3747	BPH3427	2	FALSE	-7.72504	0.309524	692	2	BPH3427,BPH3747
23	BPH3396--BPH3481	BPH3396	BPH3481	7	FALSE	-13.779	0.0666667	671	2	BPH3396,BPH3481
23	BPH3403--BPH3413	BPH3403	BPH3413	3	FALSE	2.20539	1	452	2	BPH3403,BPH3413
23	BPH3282--BPH3274	BPH3282	BPH3274	3	TRUE	-85.2295	0.015873	648	2	BPH3274,BPH3282
23	BPH3453--BPH3439	BPH3453	BPH3439	10	FALSE	-32.7318	0.031746	449	3	BPH3439,BPH3453,BPH3457
23	BPH2962--BPH2963	BPH2962	BPH2963	5	FALSE	0.683086	0.818182	596	3	BPH2962,BPH2963,BPH2964
23	BPH2729--BPH2730	BPH2729	BPH2730	6	FALSE	116.568	4.11353e-05	731	2	BPH2729,BPH2730
23	BPH3482--BPH3508	BPH3482	BPH3508	8	FALSE	19.4178	0.114286	600	2	BPH3482,BPH3508
23	BPH3529--BPH3527	BPH3529	BPH3527	46	FALSE	31.413	0.0649351	439	4	BPH3523,BPH3527,BPH3529,BPH3739
23	BPH2965--BPH2966	BPH2965	BPH2966	0	FALSE	9.15242	0.24026	531	2	BPH2965,BPH2966
23	BPH3376--BPH2726	BPH3376	BPH2726	31	FALSE	-26.1251	0.035964	422	3	BPH2726,BPH2727,BPH3376
23	BPH2974--BPH2975	BPH2974	BPH2975	0	FALSE	6.43345	0.428571	768	3	BPH2973,BPH2975,BPH2974
23	BPH3434--BPH3423	BPH3434	BPH3423	0	FALSE	41.9255	0.015873	601	3	BPH3423,BPH3434,BPH3746
23	BPH3736--BPH3352	BPH3736	BPH3352	1	FALSE	-13.9241	0.588745	737	2	BPH3352,BPH3736
23	BPH3612--BPH3602	BPH3612	BPH3602	11	FALSE	7.65837	0.309524	681	2	BPH3612,BPH3602
23	BPH2713--BPH2714	BPH2713	BPH2714	2	FALSE	17.3353	0.177489	716	2	BPH2713,BPH2714
23	BPH3381--BPH3738	BPH3381	BPH3738	2	FALSE	-6.95866	0.930736	725	2	BPH3381,BPH3738
23	BPH3524--BPH3548	BPH3524	BPH3548	1	FALSE	39.9747	0.114286	757	2	BPH3524,BPH3548
23	BPH2833--BPH2832	BPH2833	BPH2832	0	FALSE	-14.6894	0.025974	546	2	BPH2832,BPH2833
23	BPH2888--BPH2887	BPH2888	BPH2887	0	FALSE	-2.50728	0.914286	735	2	BPH2887,BPH2888
23	BPH2883--BPH2884	BPH2883	BPH2884	0	FALSE	0.76274	0.84127	634	2	BPH2883,BPH2884
23	BPH2763--BPH2823	BPH2763	BPH2823	161	FALSE	11.6822	0.00865801	657	3	BPH2763,BPH2764,BPH2823
23	BPH2705--BPH2704	BPH2705	BPH2704	0	TRUE	-36.4124	0.0151515	700	2	BPH2704,BPH2705
23	BPH2824--BPH2825	BPH2824	BPH2825	0	FALSE	-1.84537	0.937229	414	2	BPH2824,BPH2825
23	BPH3742--BPH3401	BPH3742	BPH3401	5	FALSE	-31.9749	0.00865801	431	3	BPH3401,BPH3493,BPH3742
23	BPH2959--BPH2961	BPH2959	BPH2961	0	FALSE	-11.8141	0.588745	643	3	BPH2959,BPH2960,BPH2961
23	BPH2860--BPH2784	BPH2860	BPH2784	147	TRUE	-114.455	0.00952381	661	2	BPH2784,BPH2860
23	BPH3433--BPH3748	BPH3433	BPH3748	0	FALSE	-26.3053	0.00952381	438	2	BPH3433,BPH3748
23	BPH3244--BPH3272	BPH3244	BPH3272	4	FALSE	-23.1565	0.132035	526	3	BPH3244,BPH3284,BPH3272
23	BPH2872--BPH2873	BPH2872	BPH2873	0	FALSE	-12.0854	0.536797	646	2	BPH2872,BPH2873
23	BPH2801--BPH2803	BPH2801	BPH2803	25	FALSE	3.66723	0.572761	707	3	BPH2801,BPH2802,BPH2803
23	BPH3336--BPH3733	BPH3336	BPH3733	2	TRUE	-115.831	0.004329	649	2	BPH3336,BPH3733
23	BPH2708--BPH2709	BPH2708	BPH2709	0	FALSE	7.26096	0.420635	591	2	BPH2708,BPH2709
23	BPH3246--BPH3294	BPH3246	BPH3294	8	FALSE	23.2762	0.0411255	580	2	BPH3246,BPH3294
23	BPH2867--BPH2866	BPH2867	BPH2866	2	FALSE	22.3157	0.24026	558	2	BPH2866,BPH2867
23	BPH3735--BPH3368	BPH3735	BPH3368	59	FALSE	50.4856	0.0021645	442	3	BPH3348,BPH3735,BPH3368
23	BPH3462--BPH3459	BPH3462	BPH3459	1	FALSE	27.469	0.171429	628	2	BPH3459,BPH3462
23	BPH2771--BPH2770	BPH2771	BPH2770	2	FALSE	-3.1817	0.937229	739	2	BPH2770,BPH2771
23	BPH2953--BPH2952	BPH2953	BPH2952	2	FALSE	-9.27368	0.177489	726	2	BPH2952,BPH2953
23	BPH2840--BPH2841	BPH2840	BPH2841	0	FALSE	-1.64172	0.484848	548	2	BPH2840,BPH2841
23	BPH2897--BPH2898	BPH2897	BPH2898	0	FALSE	2.0829	0.937229	772	2	BPH2897,BPH2898
23	BPH2942--BPH2943	BPH2942	BPH2943	0	FALSE	-3.36698	0.699134	636	2	BPH2942,BPH2943
23	BPH3270--BPH3216	BPH3270	BPH3216	2	FALSE	-9.95811	0.555556	567	2	BPH3216,BPH3270
23	BPH2849--BPH2850	BPH2849	BPH2850	1	FALSE	7.89025	0.662338	645	2	BPH2849,BPH2850
23	BPH3479--BPH3477	BPH3479	BPH3477	16	FALSE	-3.12279	0.792208	736	2	BPH3477,BPH3479
23	BPH2747--BPH2748	BPH2747	BPH2748	1	FALSE	6.33616	0.662338	427	2	BPH2747,BPH2748
23	BPH2842--BPH2843	BPH2842	BPH2843	0	FALSE	7.19808	0.24026	686	2	BPH2842,BPH2843
23	BPH2891--BPH2890	BPH2891	BPH2890	0	FALSE	-16.8054	0.150794	659	2	BPH2890,BPH2891
23	BPH2864--BPH2863	BPH2864	BPH2863	0	FALSE	-1.65592	0.937229	755	2	BPH2863,BPH2864
23	BPH3734--BPH3337	BPH3734	BPH3337	3	FALSE	-3.64288	0.818182	532	2	BPH3337,BPH3734
23	BPH3590--BPH3568	BPH3590	BPH3568	37	FALSE	46.2301	0.017316	695	2	BPH3590,BPH3568
23	BPH2862--BPH2861	BPH2862	BPH2861	2	FALSE	-23.7964	0.428571	765	2	BPH2861,BPH2862
23	BPH2807--BPH2808	BPH2807	BPH2808	0	FALSE	-6.67639	0.407867	688	2	BPH2807,BPH2808
23	BPH3749--BPH3437	BPH3749	BPH3437	4	FALSE	-2.2445	0.699134	693	2	BPH3437,BPH3749
23	BPH2750--BPH2751	BPH2750	BPH2751	2	FALSE	-12.9316	0.588745	764	2	BPH2750,BPH2751
23	BPH2755--BPH2754	BPH2755	BPH2754	0	FALSE	2.77606	1	630	2	BPH2754,BPH2755
23	BPH2988--BPH2987	BPH2988	BPH2987	0	FALSE	15.2499	0.420635	770	2	BPH2987,BPH2988
23	BPH2737--BPH2738	BPH2737	BPH2738	1	FALSE	-9.31894	0.0649351	557	2	BPH2737,BPH2738
23	BPH2947--BPH2948	BPH2947	BPH2948	0	FALSE	-23.761	0.179654	448	2	BPH2947,BPH2948
23	BPH3596--BPH3628	BPH3596	BPH3628	20	FALSE	15.1389	0.329004	581	2	BPH3596,BPH3628
23	BPH3584--BPH3588	BPH3584	BPH3588	9	FALSE	6.1861	0.484848	705	2	BPH3584,BPH3588
23	BPH2718--BPH2946	BPH2718	BPH2946	46	FALSE	11.3894	0.588745	457	2	BPH2718,BPH2946
23	BPH3460--BPH3389	BPH3460	BPH3389	1	FALSE	-50.9954	0.428571	560	2	BPH3389,BPH3460
23	BPH3489--BPH3501	BPH3489	BPH3501	2	FALSE	9.97263	0.125541	690	2	BPH3489,BPH3501
23	BPH3268--BPH3304	BPH3268	BPH3304	2	FALSE	-18.7354	0.792208	662	2	BPH3268,BPH3304
24	BPH3463--BPH3748	BPH3463	BPH3748	18	FALSE	-80.5549	0.0021645	429	11	BPH3401,BPH3493,BPH3742,BPH3417,BPH3743,BPH3744,BPH3745,BPH3463,BPH3741,BPH3433,BPH3748
24	BPH3226--BPH3204	BPH3226	BPH3204	4	FALSE	-30.7573	0.730159	520	3	BPH3204,BPH3226,BPH3292
24	BPH3652--BPH3658	BPH3652	BPH3658	7	FALSE	62.4292	0.00865801	489	13	BPH3636,BPH3692,BPH3668,BPH3710,BPH3706,BPH3757,BPH3658,BPH3672,BPH3648,BPH3650,BPH3652,BPH3694,BPH3755
24	BPH2988--BPH2987	BPH2988	BPH2987	0	FALSE	15.2499	0.420635	770	2	BPH2987,BPH2988
24	BPH3460--BPH3389	BPH3460	BPH3389	1	FALSE	-50.9954	0.428571	560	2	BPH3389,BPH3460
[truncated: 6,545 more rows]

## Sheet: Absolute PI uptake difference
unique_gene_symbol	is_mutated	replicate	mean_delta	median_delta
SAUSA300_1930	FALSE	1	29.5735	13.779
SAUSA300_1930	FALSE	2	33.9243	15.1389
SAUSA300_1930	FALSE	3	30.3684	15.1389
SAUSA300_1930	FALSE	4	28.2383	17.2806
SAUSA300_1930	FALSE	5	37.4685	18.7354
SAUSA300_1930	FALSE	6	29.831	15.0066
SAUSA300_1930	FALSE	7	31.9494	16.221
SAUSA300_1930	FALSE	8	35.4323	18.9065
SAUSA300_1930	FALSE	9	31.1261	15.0727
SAUSA300_1930	FALSE	10	32.7441	18.7354
SAUSA300_1930	FALSE	11	32.4702	19.4178
SAUSA300_1930	FALSE	12	32.8098	17.3031
SAUSA300_1930	FALSE	13	29.7261	13.779
SAUSA300_1930	FALSE	14	29.1429	15.0066
SAUSA300_1930	FALSE	15	31.672	15.1389
SAUSA300_1930	FALSE	16	28.7129	13.8516
SAUSA300_1930	FALSE	17	30.3416	15.0727
SAUSA300_1930	FALSE	18	30.8846	16.3863
SAUSA300_1930	FALSE	19	39.295	20.6942
SAUSA300_1930	FALSE	20	34.9027	17.2784
SAUSA300_1930	FALSE	21	34.1286	17.3031
SAUSA300_1930	FALSE	22	34.8462	18.4131
SAUSA300_1930	FALSE	23	29.4058	15.3458
SAUSA300_1930	FALSE	24	29.402	17.3997
SAUSA300_1930	FALSE	25	29.7304	13.9241
SAUSA300_1930	FALSE	26	34.979	19.9629
SAUSA300_1930	FALSE	27	32.5537	15.0727
SAUSA300_1930	FALSE	28	34.3192	15.1389
SAUSA300_1930	FALSE	29	39.39	19.8051
SAUSA300_1930	FALSE	30	34.2793	18.3605
SAUSA300_1930	FALSE	31	31.4716	17.3907
SAUSA300_1930	FALSE	32	28.2678	15.0066
SAUSA300_1930	FALSE	33	30.2331	18.3605
SAUSA300_1930	FALSE	34	33.0235	15.1389
SAUSA300_1930	FALSE	35	33.6055	15.0066
SAUSA300_1930	FALSE	36	29.1076	15.0727
SAUSA300_1930	FALSE	37	29.8091	15.1389
SAUSA300_1930	FALSE	38	30.2171	13.779
SAUSA300_1930	FALSE	39	34.0311	15.0727
SAUSA300_1930	FALSE	40	30.025	14.4653
SAUSA300_1930	FALSE	41	30.2697	14.4653
SAUSA300_1930	FALSE	42	26.3614	13.8516
SAUSA300_1930	FALSE	43	33.1397	15.9337
SAUSA300_1930	FALSE	44	31.8274	16.3863
SAUSA300_1930	FALSE	45	33.8459	19.0766
SAUSA300_1930	FALSE	46	27.4219	13.8516
SAUSA300_1930	FALSE	47	34.8181	15.1389
SAUSA300_1930	FALSE	48	32.431	16.8222
SAUSA300_1930	FALSE	49	32.926	15.1389
SAUSA300_1930	FALSE	50	32.8293	18.7354
SAUSA300_1930	FALSE	51	30.4402	15.7626
SAUSA300_1930	FALSE	52	29.0053	18.7354
SAUSA300_1930	FALSE	53	32.0848	16.3863
SAUSA300_1930	FALSE	54	35.223	16.221
SAUSA300_1930	FALSE	55	37.6816	15.1389
SAUSA300_1930	FALSE	56	28.0274	13.8516
SAUSA300_1930	FALSE	57	31.2051	18.0192
SAUSA300_1930	FALSE	58	30.4874	15.0066
SAUSA300_1930	FALSE	59	32.573	15.0066
SAUSA300_1930	FALSE	60	33.9772	15.7626
SAUSA300_1930	FALSE	61	32.6116	15.0727
SAUSA300_1930	FALSE	62	35.9325	19.0766
SAUSA300_1930	FALSE	63	31.1678	17.6246
SAUSA300_1930	FALSE	64	35.4692	19.4178
SAUSA300_1930	FALSE	65	30.1621	14.4653
SAUSA300_1930	FALSE	66	28.4093	17.3031
SAUSA300_1930	FALSE	67	29.5599	15.0727
SAUSA300_1930	FALSE	68	32.3256	15.1389
SAUSA300_1930	FALSE	69	30.2106	16.9788
SAUSA300_1930	FALSE	70	30.6	15.3417
SAUSA300_1930	FALSE	71	34.6231	15.0727
SAUSA300_1930	FALSE	72	35.5779	19.4178
SAUSA300_1930	FALSE	73	33.3367	15.1389
SAUSA300_1930	FALSE	74	31.2945	19.2014
SAUSA300_1930	FALSE	75	28.9061	15.1389
SAUSA300_1930	FALSE	76	33.3389	14.4653
SAUSA300_1930	FALSE	77	32.0091	13.779
SAUSA300_1930	FALSE	78	34.9038	17.3031
SAUSA300_1930	FALSE	79	26.406	14.4653
SAUSA300_1930	FALSE	80	29.5796	13.9241
SAUSA300_1930	FALSE	81	36.093	16.221
SAUSA300_1930	FALSE	82	27.2379	16.3863
SAUSA300_1930	FALSE	83	31.7264	16.0196
SAUSA300_1930	FALSE	84	33.349	17.2582
SAUSA300_1930	FALSE	85	28.5672	12.9936
SAUSA300_1930	FALSE	86	34.6506	16.8447
SAUSA300_1930	FALSE	87	35.4683	15.0727
SAUSA300_1930	FALSE	88	30.6375	14.4653
SAUSA300_1930	FALSE	89	36.3759	15.0727
SAUSA300_1930	FALSE	90	32.6356	14.4653
SAUSA300_1930	FALSE	91	34.1762	18.7354
SAUSA300_1930	FALSE	92	34.5361	15.0066
SAUSA300_1930	FALSE	93	29.6491	15.0066
SAUSA300_1930	FALSE	94	31.7582	17.2784
SAUSA300_1930	FALSE	95	31.4861	15.5425
SAUSA300_1930	FALSE	96	31.8652	15.1389
SAUSA300_1930	FALSE	97	29.4299	15.1389
SAUSA300_1930	FALSE	98	30.6698	19.4178
SAUSA300_1930	FALSE	99	35.9246	19.0766
SAUSA300_1930	FALSE	100	34.0159	15.7626
SAUSA300_1930	TRUE	3	21.5994	6.23793
SAUSA300_1930	TRUE	4	33.9498	25.6819
SAUSA300_1930	TRUE	5	21.5994	6.23793
SAUSA300_1930	TRUE	6	30.7409	28.3618
SAUSA300_1930	TRUE	7	60.7907	60.7907
SAUSA300_1930	TRUE	8	15.613	20.3005
SAUSA300_1930	TRUE	9	21.0509	4.59263
SAUSA300_1930	TRUE	10	28.3618	28.3618
SAUSA300_1930	TRUE	11	4.24313	4.24313
SAUSA300_1930	TRUE	12	31.2749	31.2749
SAUSA300_1930	TRUE	13	6.23793	6.23793
SAUSA300_1930	TRUE	14	2.24833	2.24833
SAUSA300_1930	TRUE	15	28.3618	28.3618
SAUSA300_1930	TRUE	16	21.8982	6.23793
SAUSA300_1930	TRUE	17	19.6573	6.23793
SAUSA300_1930	TRUE	18	6.23793	6.23793
SAUSA300_1930	TRUE	19	31.2749	31.2749
SAUSA300_1930	TRUE	20	26.8151	26.8151
SAUSA300_1930	TRUE	21	24.8655	23.3641
SAUSA300_1930	TRUE	22	31.2749	31.2749
SAUSA300_1930	TRUE	23	33.9498	25.6819
SAUSA300_1930	TRUE	24	21.3693	21.3693
SAUSA300_1930	TRUE	25	63.7071	63.7071
SAUSA300_1930	TRUE	26	31.2749	31.2749
SAUSA300_1930	TRUE	27	23.087	23.087
SAUSA300_1930	TRUE	28	28.2179	27.9302
SAUSA300_1930	TRUE	29	50.4856	50.4856
SAUSA300_1930	TRUE	30	2.24833	2.24833
SAUSA300_1930	TRUE	31	56.3119	56.3119
SAUSA300_1930	TRUE	32	16.3255	6.23793
SAUSA300_1930	TRUE	33	29.2809	35.1088
SAUSA300_1930	TRUE	34	41.9286	41.9286
SAUSA300_1930	TRUE	36	56.3119	56.3119
SAUSA300_1930	TRUE	37	23.4062	17.5322
SAUSA300_1930	TRUE	38	6.23793	6.23793
SAUSA300_1930	TRUE	40	23.4062	17.5322
SAUSA300_1930	TRUE	41	18.2562	18.2562
SAUSA300_1930	TRUE	42	48.7991	50.4856
SAUSA300_1930	TRUE	43	31.2749	31.2749
SAUSA300_1930	TRUE	44	6.23793	6.23793
SAUSA300_1930	TRUE	45	6.15343	6.23793
SAUSA300_1930	TRUE	46	59.4171	59.4171
SAUSA300_1930	TRUE	47	50.4856	50.4856
SAUSA300_1930	TRUE	48	50.4856	50.4856
SAUSA300_1930	TRUE	49	28.3618	28.3618
SAUSA300_1930	TRUE	50	22.5488	22.5488
SAUSA300_1930	TRUE	51	60.7907	60.7907
SAUSA300_1930	TRUE	52	46.3302	46.3302
SAUSA300_1930	TRUE	53	22.0608	14.8415
SAUSA300_1930	TRUE	54	38.9086	50.4856
SAUSA300_1930	TRUE	55	28.3618	28.3618
SAUSA300_1930	TRUE	56	41.9286	41.9286
SAUSA300_1930	TRUE	57	50.4856	50.4856
SAUSA300_1930	TRUE	58	4.24313	4.24313
SAUSA300_1930	TRUE	59	57.0404	57.0404
SAUSA300_1930	TRUE	60	26.367	26.367
SAUSA300_1930	TRUE	61	54.0502	54.0502
SAUSA300_1930	TRUE	62	32.1975	31.2749
SAUSA300_1930	TRUE	64	19.6573	6.23793
SAUSA300_1930	TRUE	65	56.3119	56.3119
SAUSA300_1930	TRUE	66	42.4971	50.4856
SAUSA300_1930	TRUE	67	21.9496	17.5322
SAUSA300_1930	TRUE	68	4.24313	4.24313
SAUSA300_1930	TRUE	69	24.9767	20.6734
SAUSA300_1930	TRUE	70	26.8151	26.8151
SAUSA300_1930	TRUE	72	29.2801	29.2801
SAUSA300_1930	TRUE	73	6.23793	6.23793
SAUSA300_1930	TRUE	74	50.4856	50.4856
SAUSA300_1930	TRUE	75	16.529	16.529
SAUSA300_1930	TRUE	77	15.5374	15.5374
SAUSA300_1930	TRUE	78	23.5202	20.6734
SAUSA300_1930	TRUE	79	6.23793	6.23793
SAUSA300_1930	TRUE	80	31.2749	31.2749
SAUSA300_1930	TRUE	82	6.15343	6.23793
SAUSA300_1930	TRUE	83	24.9767	20.6734
SAUSA300_1930	TRUE	84	33.12	33.12
SAUSA300_1930	TRUE	85	28.3618	28.3618
SAUSA300_1930	TRUE	86	31.2749	31.2749
SAUSA300_1930	TRUE	87	18.6786	18.6786
SAUSA300_1930	TRUE	88	56.3119	56.3119
SAUSA300_1930	TRUE	89	28.3618	28.3618
SAUSA300_1930	TRUE	90	18.6786	18.6786
SAUSA300_1930	TRUE	91	26.4459	26.4459
SAUSA300_1930	TRUE	93	27.3351	23.4451
SAUSA300_1930	TRUE	94	28.3618	28.3618
SAUSA300_1930	TRUE	95	33.0283	33.0283
SAUSA300_1930	TRUE	96	24.1593	6.23793
SAUSA300_1930	TRUE	97	3.14465	3.14465
SAUSA300_1930	TRUE	98	27.9302	27.9302
SAUSA300_1930	TRUE	99	6.23793	6.23793
SAUSA300_1930	TRUE	100	6.23793	6.23793
agrA	FALSE	1	23.7583	11.8277
agrA	FALSE	2	28.5009	14.4653
agrA	FALSE	3	23.1153	13.9241
agrA	FALSE	4	23.6099	17.2806
agrA	FALSE	5	30.7683	15.1389
agrA	FALSE	6	25.7678	14.4653
agrA	FALSE	7	27.3403	16.221
agrA	FALSE	8	30.1243	16.767
agrA	FALSE	9	25.8924	13.9241
agrA	FALSE	10	27.4164	18.391
agrA	FALSE	11	26.6846	16.2029
agrA	FALSE	12	30.3142	15.1389
agrA	FALSE	13	27.1571	9.97263
agrA	FALSE	14	27.5737	15.0066
agrA	FALSE	15	29.2162	15.0727
agrA	FALSE	16	27.022	13.249
agrA	FALSE	17	22.235	13.8516
agrA	FALSE	18	27.7144	15.1389
agrA	FALSE	19	32.3695	17.0055
agrA	FALSE	20	28.8965	15.0066
agrA	FALSE	21	28.9003	15.7626
agrA	FALSE	22	29.6208	16.1985
agrA	FALSE	23	28.0097	17.0406
agrA	FALSE	24	26.7471	17.3997
agrA	FALSE	25	25.5237	14.4653
agrA	FALSE	26	32.5542	19.4178
agrA	FALSE	27	27.5909	15.0727
agrA	FALSE	28	26.7011	15.0066
agrA	FALSE	29	32.2076	17.2784
agrA	FALSE	30	28.2274	15.1389
agrA	FALSE	31	24.2597	15.0727
agrA	FALSE	32	26.5175	15.0066
agrA	FALSE	33	26.5294	17.3031
agrA	FALSE	34	23.7276	15.0066
agrA	FALSE	35	24.3846	14.1498
agrA	FALSE	36	24.7675	15.0066
agrA	FALSE	37	27.7525	15.1389
agrA	FALSE	38	25.1557	13.489
agrA	FALSE	39	28.0796	13.9241
agrA	FALSE	40	28.5734	15.0066
agrA	FALSE	41	21.8449	13.9241
agrA	FALSE	42	22.2151	13.779
agrA	FALSE	43	28.1489	15.0066
agrA	FALSE	44	23.7501	15.1389
agrA	FALSE	45	24.8179	15.0727
agrA	FALSE	46	27.6988	15.0066
agrA	FALSE	47	27.7795	15.0727
agrA	FALSE	48	27.8344	15.7626
agrA	FALSE	49	31.2557	15.1389
agrA	FALSE	50	24.8536	18.3952
agrA	FALSE	51	26.4392	15.7626
agrA	FALSE	52	27.479	19.0766
agrA	FALSE	53	27.6244	15.3417
agrA	FALSE	54	29.5778	15.1389
agrA	FALSE	55	26.522	13.8516
agrA	FALSE	56	23.16	13.779
agrA	FALSE	57	29.8715	18.0192
agrA	FALSE	58	24.7993	13.9241
agrA	FALSE	59	27.2257	13.9241
agrA	FALSE	60	29.4642	15.1389
agrA	FALSE	61	32.1845	16.9371
agrA	FALSE	62	27.887	15.7626
agrA	FALSE	63	26.5712	16.3818
agrA	FALSE	64	26.9671	15.0727
agrA	FALSE	65	26.0936	14.4653
agrA	FALSE	66	26.0506	18.7354
agrA	FALSE	67	26.3523	15.0066
agrA	FALSE	68	26.759	15.0066
agrA	FALSE	69	25.0541	15.4451
agrA	FALSE	70	22.4947	15.0066
agrA	FALSE	71	29.4384	15.0066
agrA	FALSE	72	31.2533	18.7354
agrA	FALSE	73	24.5387	13.8516
agrA	FALSE	74	30.0743	19.4178
agrA	FALSE	75	22.3944	15.0727
agrA	FALSE	76	24.6635	13.8516
agrA	FALSE	77	24.078	13.1989
agrA	FALSE	78	29.6985	16.3863
agrA	FALSE	79	23.8725	13.9241
agrA	FALSE	80	24.3451	13.779
agrA	FALSE	81	26.8964	15.0727
agrA	FALSE	82	24.3943	15.0727
agrA	FALSE	83	26.8275	15.1389
agrA	FALSE	84	28.7174	15.5445
agrA	FALSE	85	26.7959	12.9936
agrA	FALSE	86	26.7525	15.0727
agrA	FALSE	87	29.6929	15.0066
agrA	FALSE	88	29.1745	15.0066
agrA	FALSE	89	29.7034	13.9241
agrA	FALSE	90	25.1516	13.8516
agrA	FALSE	91	29.3439	17.6246
agrA	FALSE	92	24.7744	13.779
agrA	FALSE	93	26.9741	15.0066
agrA	FALSE	94	28.7053	15.0727
agrA	FALSE	95	26.4442	15.1389
agrA	FALSE	96	28.3427	15.0066
agrA	FALSE	97	24.1582	15.0066
agrA	FALSE	98	29.5893	20.056
agrA	FALSE	99	27.233	15.0727
agrA	FALSE	100	25.353	13.9241
agrA	TRUE	1	65.4341	56.7531
agrA	TRUE	2	77.311	60.6017
agrA	TRUE	3	73.2376	60.6017
agrA	TRUE	4	63.9189	52.2074
agrA	TRUE	5	82.8885	78.8754
agrA	TRUE	6	67.9401	60.6017
agrA	TRUE	7	74.5907	93.8548
agrA	TRUE	8	63.4313	69.7385
agrA	TRUE	9	61.8522	46.0073
agrA	TRUE	10	65.9132	58.1903
agrA	TRUE	11	55.7686	55.779
agrA	TRUE	12	49.3512	46.0073
agrA	TRUE	13	45.067	36.2039
agrA	TRUE	14	37.2589	11.6822
agrA	TRUE	15	50.9772	60.4885
agrA	TRUE	16	37.3874	15.9461
agrA	TRUE	17	76.7185	60.6017
agrA	TRUE	18	53.2188	60.6017
agrA	TRUE	19	76.5774	60.6017
agrA	TRUE	20	66.055	60.6017
agrA	TRUE	21	68.5444	34.5135
agrA	TRUE	22	77.311	60.6017
agrA	TRUE	23	45.1621	31.413
agrA	TRUE	24	46.1934	37.0557
agrA	TRUE	25	69.7747	63.0687
agrA	TRUE	26	50.3139	46.0073
agrA	TRUE	27	60.4371	23.087
agrA	TRUE	28	96.174	114.455
agrA	TRUE	29	89.1224	88.9232
agrA	TRUE	30	70.2955	57.6972
agrA	TRUE	31	80.3522	60.6017
agrA	TRUE	32	38.9556	11.6822
agrA	TRUE	33	50.7096	32.7981
agrA	TRUE	34	92.4394	114.455
agrA	TRUE	35	105.067	129.879
agrA	TRUE	36	61.8522	46.0073
agrA	TRUE	37	48.5994	36.1419
agrA	TRUE	38	69.7747	63.0687
agrA	TRUE	39	78.072	60.6017
agrA	TRUE	40	38.9556	11.6822
agrA	TRUE	41	84.4374	114.455
agrA	TRUE	42	65.9132	58.1903
agrA	TRUE	43	77.311	60.6017
agrA	TRUE	44	96.174	114.455
agrA	TRUE	45	76.1457	60.6017
agrA	TRUE	46	44.5986	11.6822
agrA	TRUE	47	79.661	85.1171
agrA	TRUE	48	70.9757	60.6017
agrA	TRUE	49	48.5994	36.1419
agrA	TRUE	50	96.174	114.455
agrA	TRUE	51	57.6388	60.6017
agrA	TRUE	52	48.5994	36.1419
agrA	TRUE	53	59.4912	52.1181
agrA	TRUE	54	79.4046	85.1171
agrA	TRUE	55	95.5994	114.455
agrA	TRUE	56	63.6048	51.2651
agrA	TRUE	57	44.6628	34.1831
agrA	TRUE	58	69.9795	61.0568
agrA	TRUE	59	75.486	61.0859
agrA	TRUE	60	67.9401	60.6017
agrA	TRUE	61	44.5986	11.6822
agrA	TRUE	62	89.7609	87.5285
agrA	TRUE	63	67.9401	60.6017
agrA	TRUE	64	89.9117	87.5285
agrA	TRUE	65	67.9401	60.6017
agrA	TRUE	66	56.2035	11.6822
agrA	TRUE	67	52.3401	60.6017
agrA	TRUE	68	69.7747	63.0687
agrA	TRUE	69	66.2542	61.0897
agrA	TRUE	70	76.9923	60.6017
agrA	TRUE	71	91.6552	114.455
agrA	TRUE	72	65.9132	58.1903
agrA	TRUE	73	90.4067	88.0127
agrA	TRUE	74	48.5994	36.1419
agrA	TRUE	75	65.9132	58.1903
agrA	TRUE	76	82.4994	94.4013
agrA	TRUE	77	105.067	129.879
agrA	TRUE	78	64.6195	48.4028
agrA	TRUE	79	48.5994	36.1419
agrA	TRUE	80	65.9132	58.1903
agrA	TRUE	81	105.067	129.879
agrA	TRUE	82	38.497	23.9431
agrA	TRUE	83	80.0892	79.9232
agrA	TRUE	84	58.1863	50.585
agrA	TRUE	85	42.0789	34.6888
agrA	TRUE	86	86.179	87.5285
agrA	TRUE	87	91.6552	114.455
agrA	TRUE	88	45.8888	36.1419
agrA	TRUE	89	82.5466	111.196
agrA	TRUE	90	80.3711	88.0165
agrA	TRUE	91	64.6195	48.4028
agrA	TRUE	92	91.4796	104.911
agrA	TRUE	93	46.6175	50.988
agrA	TRUE	94	50.979	55.7383
agrA	TRUE	95	60.017	60.6017
agrA	TRUE	96	56.1264	60.6017
agrA	TRUE	97	56.5514	55.779
agrA	TRUE	98	38.497	23.9431
agrA	TRUE	99	78.8665	60.6017
agrA	TRUE	100	85.6952	87.5285
agrC	FALSE	1	30.5921	13.9241
agrC	FALSE	2	33.5888	15.0727
agrC	FALSE	3	30.1779	15.0066
agrC	FALSE	4	28.4503	17.3031
agrC	FALSE	5	36.6463	16.767
agrC	FALSE	6	29.0807	13.8516
agrC	FALSE	7	33.157	18.3605
agrC	FALSE	8	35.6484	18.9065
agrC	FALSE	9	29.3491	13.8516
agrC	FALSE	10	32.6304	18.5632
agrC	FALSE	11	32.3451	17.5608
agrC	FALSE	12	32.5542	15.1389
agrC	FALSE	13	29.6931	13.779
agrC	FALSE	14	28.7107	14.4653
agrC	FALSE	15	31.463	15.1389
agrC	FALSE	16	28.7011	13.779
agrC	FALSE	17	30.4224	15.0066
agrC	FALSE	18	30.7403	15.7626
agrC	FALSE	19	40.1604	20.6942
agrC	FALSE	20	35.0696	19.4178
agrC	FALSE	21	33.5021	17.3031
agrC	FALSE	22	34.6331	17.2582
agrC	FALSE	23	29.8501	17.0406
agrC	FALSE	24	29.9977	18.4131
agrC	FALSE	25	31.4289	15.0066
agrC	FALSE	26	34.8099	19.4178
agrC	FALSE	27	32.6189	15.1389
agrC	FALSE	28	33.8899	15.1389
agrC	FALSE	29	40.6983	20.2497
agrC	FALSE	30	34.321	17.3031
agrC	FALSE	31	31.8584	17.3907
agrC	FALSE	32	28.8567	15.1389
agrC	FALSE	33	30.5132	19.4178
agrC	FALSE	34	33.941	16.221
agrC	FALSE	35	34.2974	15.0066
agrC	FALSE	36	29.2744	15.0066
agrC	FALSE	37	28.8098	13.9241
agrC	FALSE	38	30.0249	13.489
agrC	FALSE	39	34.8664	15.0727
agrC	FALSE	40	30.4484	15.0066
agrC	FALSE	41	30.2334	15.0066
agrC	FALSE	42	27.084	13.8516
agrC	FALSE	43	32.8395	15.1389
agrC	FALSE	44	32.2769	16.8447
agrC	FALSE	45	33.0195	18.0192
agrC	FALSE	46	28.4483	13.9241
agrC	FALSE	47	35.4971	15.7626
agrC	FALSE	48	34.2089	16.8222
agrC	FALSE	49	33.8966	18.4131
agrC	FALSE	50	33.7355	19.0766
agrC	FALSE	51	32.8016	18.0192
agrC	FALSE	52	30.385	19.4964
agrC	FALSE	53	32.0073	15.9654
agrC	FALSE	54	36.4426	17.3031
agrC	FALSE	55	39.1182	18.4131
agrC	FALSE	56	28.6096	13.9241
agrC	FALSE	57	31.6959	18.0192
agrC	FALSE	58	29.7459	14.4653
agrC	FALSE	59	33.0188	15.0066
agrC	FALSE	60	33.5604	15.1389
agrC	FALSE	61	33.5595	15.1389
agrC	FALSE	62	36.3121	18.7354
agrC	FALSE	63	31.5998	17.6246
agrC	FALSE	64	33.3718	15.1389
agrC	FALSE	65	31.2895	15.0727
agrC	FALSE	66	29.3944	17.3031
agrC	FALSE	67	28.5816	14.4653
agrC	FALSE	68	32.1496	15.0727
agrC	FALSE	69	30.1863	16.9788
agrC	FALSE	70	31.6961	15.3417
agrC	FALSE	71	35.0866	15.0727
agrC	FALSE	72	35.17	18.7354
agrC	FALSE	73	33.9647	15.1389
agrC	FALSE	74	31.7281	19.2014
agrC	FALSE	75	29.1225	16.3863
agrC	FALSE	76	34.8324	15.0066
agrC	FALSE	77	31.7255	13.779
agrC	FALSE	78	33.4714	16.8447
agrC	FALSE	79	26.1452	13.9241
agrC	FALSE	80	29.3991	13.8516
agrC	FALSE	81	36.9546	17.3031
agrC	FALSE	82	26.9016	15.7626
agrC	FALSE	83	31.0197	15.5792
agrC	FALSE	84	34.694	17.2806
agrC	FALSE	85	28.955	12.9936
agrC	FALSE	86	34.6183	16.8447
agrC	FALSE	87	35.0203	15.0727
agrC	FALSE	88	31.4469	15.0066
agrC	FALSE	89	36.3466	15.0066
agrC	FALSE	90	33.4125	15.0066
agrC	FALSE	91	34.7189	17.6246
agrC	FALSE	92	34.9357	15.0066
agrC	FALSE	93	29.9917	15.0066
agrC	FALSE	94	31.6242	15.1389
agrC	FALSE	95	30.5272	15.1389
agrC	FALSE	96	32.0008	15.0727
agrC	FALSE	97	30.2122	16.221
agrC	FALSE	98	32.2462	21.5049
agrC	FALSE	99	36.2966	18.7354
agrC	FALSE	100	34.9379	15.7626
agrC	TRUE	1	9.03841	9.72843
agrC	TRUE	2	38.6212	26.9911
agrC	TRUE	3	26.8979	33.4192
agrC	TRUE	4	31.6212	36.7196
agrC	TRUE	5	34.1993	36.4134
agrC	TRUE	6	37.462	36.7196
agrC	TRUE	7	7.65837	7.65837
agrC	TRUE	8	22.0819	22.2847
agrC	TRUE	9	40.0072	45.8284
agrC	TRUE	10	31.4146	36.0999
agrC	TRUE	11	22.4305	31.6049
agrC	TRUE	12	34.7899	37.5947
agrC	TRUE	13	7.65837	7.65837
agrC	TRUE	14	27.1734	22.189
agrC	TRUE	15	27.7565	9.72843
agrC	TRUE	16	25.4022	23.3739
agrC	TRUE	17	21.3789	17.3247
agrC	TRUE	18	21.8791	21.8791
agrC	TRUE	19	25.9814	19.9777
agrC	TRUE	20	26.8702	9.72843
agrC	TRUE	21	29.072	29.072
agrC	TRUE	22	35.3509	38.7166
agrC	TRUE	23	28.3784	26.9911
agrC	TRUE	24	14.7129	7.65837
agrC	TRUE	25	7.65837	7.65837
agrC	TRUE	26	34.9448	37.9045
agrC	TRUE	27	26.7434	26.7434
agrC	TRUE	28	34.6574	45.8284
agrC	TRUE	29	24.6873	9.72843
agrC	TRUE	30	17.3247	17.3247
agrC	TRUE	31	33.5633	36.7196
agrC	TRUE	32	6.87389	8.6934
agrC	TRUE	33	26.0882	26.7434
agrC	TRUE	34	21.8791	21.8791
agrC	TRUE	35	22.189	22.189
agrC	TRUE	36	34.1993	36.4134
agrC	TRUE	37	33.3685	34.1622
agrC	TRUE	38	21.8791	21.8791
agrC	TRUE	39	17.3247	17.3247
agrC	TRUE	40	18.7723	9.72843
agrC	TRUE	41	7.65837	7.65837
agrC	TRUE	42	38.2001	50.4856
agrC	TRUE	43	36.5995	45.8284
agrC	TRUE	44	9.03841	9.72843
agrC	TRUE	45	16.5512	9.72843
agrC	TRUE	46	33.3567	36.0999
agrC	TRUE	47	29.072	29.072
agrC	TRUE	48	22.5296	19.3111
agrC	TRUE	49	18.113	9.72843
agrC	TRUE	50	20.7448	18.1157
agrC	TRUE	51	6.87389	8.6934
agrC	TRUE	52	9.03841	9.72843
agrC	TRUE	53	24.9031	23.4451
agrC	TRUE	54	23.6561	21.8791
agrC	TRUE	55	14.7043	8.6934
agrC	TRUE	56	21.8791	21.8791
agrC	TRUE	57	31.4146	36.0999
agrC	TRUE	58	7.65837	7.65837
agrC	TRUE	59	40.2367	48.4882
agrC	TRUE	60	30.2472	17.8405
agrC	TRUE	61	26.7434	26.7434
agrC	TRUE	62	29.68	36.0999
agrC	TRUE	63	21.8791	21.8791
agrC	TRUE	64	44.8585	50.4856
agrC	TRUE	65	18.6488	6.48537
agrC	TRUE	66	28.3784	26.9911
agrC	TRUE	67	33.1997	37.3274
agrC	TRUE	68	15.8328	12.849
agrC	TRUE	69	25.2675	22.189
agrC	TRUE	70	21.6656	19.6317
agrC	TRUE	71	26.7434	26.7434
agrC	TRUE	72	37.222	42.4589
agrC	TRUE	73	14.8849	7.65837
agrC	TRUE	74	31.6212	36.7196
agrC	TRUE	75	7.65837	7.65837
agrC	TRUE	76	14.9194	7.65837
agrC	TRUE	77	23.2897	9.72843
agrC	TRUE	78	41.6889	50.4856
agrC	TRUE	79	22.189	22.189
agrC	TRUE	80	33.3567	36.0999
agrC	TRUE	81	7.65837	7.65837
agrC	TRUE	82	4.01935	4.01935
agrC	TRUE	83	33.5633	36.7196
agrC	TRUE	84	11.6766	7.65837
agrC	TRUE	85	23.811	22.189
agrC	TRUE	86	31.9851	31.9851
agrC	TRUE	87	26.7434	26.7434
agrC	TRUE	88	27.5447	26.7434
agrC	TRUE	89	31.4146	36.0999
agrC	TRUE	90	11.6766	7.65837
agrC	TRUE	91	27.8907	33.8524
agrC	TRUE	92	26.7434	26.7434
agrC	TRUE	93	24.9031	23.4451
agrC	TRUE	94	31.4146	36.0999
agrC	TRUE	95	39.9655	39.0895
agrC	TRUE	96	17.3247	17.3247
agrC	TRUE	97	14.2529	5.40151
agrC	TRUE	98	11.0675	8.44929
agrC	TRUE	99	24.6905	19.9777
agrC	TRUE	100	11.8486	7.65837
araB	FALSE	1	29.5735	13.779
araB	FALSE	2	34.0359	15.0727
araB	FALSE	3	30.1025	15.0066
araB	FALSE	4	28.575	17.3031
araB	FALSE	5	35.7144	18.3952
araB	FALSE	6	29.0638	13.9241
araB	FALSE	7	31.7675	16.221
araB	FALSE	8	34.4687	18.9065
araB	FALSE	9	30.6954	14.4653
araB	FALSE	10	32.6297	18.5632
araB	FALSE	11	31.4888	17.5608
araB	FALSE	12	33.3036	18.3605
araB	FALSE	13	28.1802	10.8274
araB	FALSE	14	28.5826	14.4653
araB	FALSE	15	31.5188	15.0727
araB	FALSE	16	28.736	13.8516
araB	FALSE	17	30.1669	15.0727
araB	FALSE	18	29.8129	15.0727
araB	FALSE	19	39.4174	21.5049
araB	FALSE	20	34.551	17.2784
araB	FALSE	21	33.6616	16.8447
araB	FALSE	22	34.3472	17.2582
araB	FALSE	23	29.76	18.7354
araB	FALSE	24	29.2984	16.3863
araB	FALSE	25	30.7297	14.4653
araB	FALSE	26	34.1308	19.6904
araB	FALSE	27	32.2832	15.1389
araB	FALSE	28	34.5105	17.3031
araB	FALSE	29	39.1897	19.6115
araB	FALSE	30	33.5978	17.3031
araB	FALSE	31	31.222	17.3907
araB	FALSE	32	26.7829	13.8516
araB	FALSE	33	29.4791	18.3605
araB	FALSE	34	33.2709	16.221
araB	FALSE	35	33.6055	15.0066
araB	FALSE	36	29.7122	15.1389
araB	FALSE	37	29.3258	15.1389
araB	FALSE	38	29.6176	13.489
araB	FALSE	39	33.237	15.0066
araB	FALSE	40	29.5347	14.4653
araB	FALSE	41	29.669	14.4653
araB	FALSE	42	28.2451	14.4653
araB	FALSE	43	33.0848	15.1389
araB	FALSE	44	31.3428	16.0196
araB	FALSE	45	32.2158	16.6246
araB	FALSE	46	27.879	13.8516
araB	FALSE	47	35.1912	15.7626
araB	FALSE	48	32.8508	17.2582
araB	FALSE	49	32.2976	15.0066
araB	FALSE	50	32.1038	18.5653
araB	FALSE	51	30.294	15.1389
araB	FALSE	52	28.7414	19.0766
araB	FALSE	53	30.7986	15.9654
araB	FALSE	54	34.8168	16.221
araB	FALSE	55	36.9726	15.0066
araB	FALSE	56	28.3232	13.9241
araB	FALSE	57	31.7419	18.0192
araB	FALSE	58	29.4195	13.8516
araB	FALSE	59	33.6604	15.1389
araB	FALSE	60	32.8653	15.1389
araB	FALSE	61	33.191	15.1389
araB	FALSE	62	35.6212	19.0766
araB	FALSE	63	31.4756	16.6835
araB	FALSE	64	33.9028	15.7626
araB	FALSE	65	31.0234	14.4653
araB	FALSE	66	29.5196	17.3031
araB	FALSE	67	28.951	15.0727
araB	FALSE	68	30.9557	15.0066
araB	FALSE	69	30.0314	15.5445
araB	FALSE	70	30.4727	15.1389
araB	FALSE	71	35.0206	15.0066
araB	FALSE	72	34.6617	19.0766
araB	FALSE	73	32.0057	15.0066
araB	FALSE	74	31.1149	18.9849
araB	FALSE	75	28.5263	15.1389
araB	FALSE	76	33.3389	14.4653
araB	FALSE	77	31.277	13.779
araB	FALSE	78	34.0779	16.8447
araB	FALSE	79	26.1413	13.8516
araB	FALSE	80	28.8487	13.8516
araB	FALSE	81	36.093	16.221
araB	FALSE	82	26.394	15.1389
araB	FALSE	83	30.3917	15.5792
araB	FALSE	84	33.5926	16.8222
araB	FALSE	85	28.5593	12.9936
araB	FALSE	86	33.7418	16.3863
araB	FALSE	87	34.5846	15.0727
araB	FALSE	88	31.1409	15.0066
araB	FALSE	89	35.9943	15.0727
araB	FALSE	90	32.054	14.4653
araB	FALSE	91	34.1999	19.0766
araB	FALSE	92	34.0122	13.9241
araB	FALSE	93	29.5205	15.0727
araB	FALSE	94	31.3243	17.2784
araB	FALSE	95	31.5531	15.7585
araB	FALSE	96	31.3627	15.0727
araB	FALSE	97	28.5377	15.0727
araB	FALSE	98	30.6171	20.056
araB	FALSE	99	35.2649	18.7354
araB	FALSE	100	33.998	15.7626
araB	TRUE	2	29.014	29.014
araB	TRUE	3	17.6246	17.6246
araB	TRUE	4	32.1012	32.1012
araB	TRUE	5	68.794	68.794
araB	TRUE	6	50.4476	50.4476
araB	TRUE	7	68.794	68.794
araB	TRUE	9	20.7118	20.7118
araB	TRUE	10	29.014	29.014
araB	TRUE	11	29.014	29.014
araB	TRUE	12	7.02371	7.02371
araB	TRUE	13	50.4476	50.4476
araB	TRUE	15	32.1012	32.1012
araB	TRUE	16	7.02371	7.02371
araB	TRUE	17	7.02371	7.02371
araB	TRUE	18	43.2093	43.2093
araB	TRUE	19	17.6246	17.6246
araB	TRUE	21	17.6246	17.6246
araB	TRUE	22	42.5009	42.5009
araB	TRUE	24	18.4131	18.4131
araB	TRUE	26	66.5886	66.5886
araB	TRUE	28	7.02371	7.02371
araB	TRUE	29	49.3449	49.3449
araB	TRUE	31	68.794	68.794
araB	TRUE	32	50.4476	50.4476
araB	TRUE	33	66.5886	66.5886
araB	TRUE	39	66.5886	66.5886
araB	TRUE	42	7.02371	7.02371
araB	TRUE	43	32.1012	32.1012
araB	TRUE	44	29.014	29.014
araB	TRUE	45	29.014	29.014
araB	TRUE	46	48.904	48.904
araB	TRUE	49	42.5009	42.5009
araB	TRUE	50	43.6502	43.6502
araB	TRUE	51	48.904	48.904
araB	TRUE	52	43.2093	43.2093
araB	TRUE	53	66.5886	66.5886
araB	TRUE	54	66.5886	66.5886
araB	TRUE	55	43.6036	43.6036
araB	TRUE	57	29.014	29.014
araB	TRUE	58	20.7118	20.7118
araB	TRUE	60	68.794	68.794
araB	TRUE	63	17.6246	17.6246
araB	TRUE	64	49.3449	49.3449
araB	TRUE	65	18.4131	18.4131
araB	TRUE	66	20.7118	20.7118
araB	TRUE	69	18.4131	18.4131
araB	TRUE	70	29.014	29.014
araB	TRUE	71	20.7118	20.7118
araB	TRUE	72	68.794	68.794
araB	TRUE	73	68.794	68.794
araB	TRUE	74	44.7529	44.7529
araB	TRUE	75	32.1012	32.1012
araB	TRUE	78	29.014	29.014
araB	TRUE	79	18.4131	18.4131
araB	TRUE	80	66.5886	66.5886
araB	TRUE	82	7.02371	7.02371
araB	TRUE	83	68.794	68.794
araB	TRUE	84	20.7118	20.7118
araB	TRUE	86	68.794	68.794
araB	TRUE	91	17.6246	17.6246
araB	TRUE	92	44.7529	44.7529
araB	TRUE	94	37.9089	37.9089
araB	TRUE	97	36.8062	36.8062
araB	TRUE	100	7.02371	7.02371
ausA	FALSE	1	29.4559	13.779
ausA	FALSE	2	29.6964	13.9241
ausA	FALSE	3	26.264	13.8516
ausA	FALSE	4	27.4785	17.2582
ausA	FALSE	5	33.8206	16.767
ausA	FALSE	6	30.7297	15.0066
ausA	FALSE	7	31.6874	15.1389
ausA	FALSE	8	35.1948	18.3952
ausA	FALSE	9	30.9505	15.0066
ausA	FALSE	10	31.6304	18.391
ausA	FALSE	11	31.8541	17.5608
ausA	FALSE	12	30.7302	14.4653
ausA	FALSE	13	27.0717	9.95811
ausA	FALSE	14	27.2011	13.8516
ausA	FALSE	15	30.5603	15.0066
ausA	FALSE	16	27.983	13.249
ausA	FALSE	17	26.5946	13.8516
ausA	FALSE	18	30.5698	15.1389
ausA	FALSE	19	36.512	20.6942
ausA	FALSE	20	35.3214	17.9165
ausA	FALSE	21	29.3064	15.1389
ausA	FALSE	22	31.4216	15.1389
ausA	FALSE	23	29.1362	15.3458
ausA	FALSE	24	28.4921	17.3997
ausA	FALSE	25	28.8485	13.8516
ausA	FALSE	26	34.8183	19.9629
ausA	FALSE	27	31.8855	15.0727
ausA	FALSE	28	30.4218	15.0066
ausA	FALSE	29	37.6607	20.2497
ausA	FALSE	30	30.3855	15.0727
ausA	FALSE	31	29.0429	16.3863
ausA	FALSE	32	26.8282	13.779
ausA	FALSE	33	29.4108	17.3031
ausA	FALSE	34	27.7722	14.4653
ausA	FALSE	35	27.9726	13.9241
ausA	FALSE	36	29.1148	15.0066
ausA	FALSE	37	28.4486	15.0066
ausA	FALSE	38	29.2746	12.2942
ausA	FALSE	39	29.7399	13.9241
ausA	FALSE	40	28.9443	13.8516
ausA	FALSE	41	24.7638	12.5842
ausA	FALSE	42	24.5117	13.3836
ausA	FALSE	43	29.8158	15.0066
ausA	FALSE	44	26.9682	14.4653
ausA	FALSE	45	28.7318	15.1389
ausA	FALSE	46	28.7181	13.9241
ausA	FALSE	47	29.6863	14.4653
ausA	FALSE	48	28.3577	15.0727
ausA	FALSE	49	32.9776	15.1389
ausA	FALSE	50	28.6566	16.767
ausA	FALSE	51	29.8376	15.1389
ausA	FALSE	52	29.4506	18.7354
ausA	FALSE	53	28.7902	15.5445
ausA	FALSE	54	32.5248	15.0727
ausA	FALSE	55	33.9041	14.4653
ausA	FALSE	56	28.509	14.4653
ausA	FALSE	57	30.5626	17.3031
ausA	FALSE	58	24.9822	13.779
ausA	FALSE	59	29.4068	13.9241
ausA	FALSE	60	34.3547	15.1389
ausA	FALSE	61	32.0748	15.0066
ausA	FALSE	62	33.0236	16.3863
ausA	FALSE	63	31.3014	17.6246
ausA	FALSE	64	31.3921	15.1389
ausA	FALSE	65	30.0936	14.4653
ausA	FALSE	66	28.4196	17.3031
ausA	FALSE	67	28.6659	15.0066
ausA	FALSE	68	31.2454	15.0066
ausA	FALSE	69	25.9444	15.3458
ausA	FALSE	70	27.2278	15.0727
ausA	FALSE	71	30.0618	13.9241
ausA	FALSE	72	36.3912	20.0664
ausA	FALSE	73	29.3793	13.8516
ausA	FALSE	74	31.1936	19.264
ausA	FALSE	75	27.2055	15.0727
ausA	FALSE	76	28.4587	13.389
ausA	FALSE	77	27.2285	12.2942
ausA	FALSE	78	30.5959	16.1662
ausA	FALSE	79	25.1751	13.9241
ausA	FALSE	80	28.9031	13.8516
ausA	FALSE	81	30.604	14.4653
ausA	FALSE	82	25.295	15.0727
ausA	FALSE	83	27.164	14.4653
ausA	FALSE	84	30.5834	16.3863
ausA	FALSE	85	28.4705	12.9936
ausA	FALSE	86	30.4318	15.0727
ausA	FALSE	87	30.0548	13.9241
ausA	FALSE	88	30.8309	14.4653
ausA	FALSE	89	32.1863	13.9241
ausA	FALSE	90	28.8496	13.8516
ausA	FALSE	91	30.9547	17.4639
ausA	FALSE	92	30.5206	13.779
ausA	FALSE	93	29.5004	15.0727
ausA	FALSE	94	30.8131	15.0727
ausA	FALSE	95	30.7116	15.0727
ausA	FALSE	96	31.5879	15.0066
ausA	FALSE	97	28.2635	15.0066
ausA	FALSE	98	30.494	21.7106
ausA	FALSE	99	31.6229	16.221
ausA	FALSE	100	29.4079	13.9241
ausA	TRUE	1	30.2988	15.6228
ausA	TRUE	2	77.2602	68.3855
ausA	TRUE	3	57.4514	27.8674
ausA	TRUE	4	38.7106	22.3157
ausA	TRUE	5	53.8528	20.8668
ausA	TRUE	6	25.4552	15.55
ausA	TRUE	7	38.4593	20.8668
ausA	TRUE	8	30.4234	19.4178
ausA	TRUE	9	28.2036	15.6228
ausA	TRUE	10	41.9677	20.8668
ausA	TRUE	11	29.347	19.4178
ausA	TRUE	12	44.2543	32.5228
ausA	TRUE	13	45.733	22.3157
ausA	TRUE	14	38.2531	20.8668
ausA	TRUE	15	41.9677	20.8668
ausA	TRUE	16	30.7972	19.4178
ausA	TRUE	17	49.3155	22.092
ausA	TRUE	18	29.2072	19.4178
ausA	TRUE	19	55.6388	20.8668
ausA	TRUE	20	29.4152	15.55
ausA	TRUE	21	51.7997	27.7793
ausA	TRUE	22	57.057	25.0709
ausA	TRUE	23	34.2301	20.8668
ausA	TRUE	24	32.1707	17.7187
ausA	TRUE	25	39.5089	20.8668
ausA	TRUE	26	34.8425	20.8668
ausA	TRUE	27	34.6693	19.4178
ausA	TRUE	28	64.176	22.3157
ausA	TRUE	29	52.7684	20.8668
ausA	TRUE	30	51.9539	22.3157
ausA	TRUE	31	53.8271	20.8668
ausA	TRUE	32	31.8047	19.4178
ausA	TRUE	33	34.5018	20.8668
ausA	TRUE	34	77.2602	68.3855
ausA	TRUE	35	77.2602	68.3855
ausA	TRUE	36	33.5952	20.6451
ausA	TRUE	37	34.2604	20.8668
ausA	TRUE	38	31.561	17.7187
ausA	TRUE	39	55.4869	22.3157
ausA	TRUE	40	32.9298	20.7549
ausA	TRUE	41	57.4651	26.2951
ausA	TRUE	42	46.547	22.3157
ausA	TRUE	43	53.0257	22.3157
ausA	TRUE	44	61.577	33.3588
ausA	TRUE	45	49.6713	29.6669
ausA	TRUE	46	28.9713	19.4178
ausA	TRUE	47	68.2207	55.3858
ausA	TRUE	48	66.9986	25.9526
ausA	TRUE	49	31.0518	16.1911
ausA	TRUE	50	58.9342	30.7026
ausA	TRUE	51	39.6164	20.8668
ausA	TRUE	52	29.1264	19.4178
ausA	TRUE	53	48.0763	20.8668
ausA	TRUE	54	62.2578	22.3157
ausA	TRUE	55	64.1737	22.3157
ausA	TRUE	56	27.2614	11.8277
ausA	TRUE	57	41.9677	20.8668
ausA	TRUE	58	53.8528	20.8668
ausA	TRUE	59	77.2602	68.3855
ausA	TRUE	60	29.6999	19.4178
ausA	TRUE	61	41.1142	22.3157
ausA	TRUE	62	50.8363	22.3157
ausA	TRUE	63	30.2988	15.6228
ausA	TRUE	64	53.7376	22.3157
ausA	TRUE	65	35.9397	19.4178
ausA	TRUE	66	36.7781	19.4178
ausA	TRUE	67	30.25	19.4178
ausA	TRUE	68	29.2658	15.55
ausA	TRUE	69	54.6451	22.3157
ausA	TRUE	70	52.9434	20.8668
ausA	TRUE	71	62.9032	22.3157
ausA	TRUE	72	29.632	17.7187
ausA	TRUE	73	49.7367	28.7723
ausA	TRUE	74	35.9397	19.4178
ausA	TRUE	75	41.9677	20.8668
ausA	TRUE	76	77.2602	68.3855
ausA	TRUE	77	53.2546	22.3157
ausA	TRUE	78	54.2464	22.3157
ausA	TRUE	79	31.4559	15.6228
ausA	TRUE	80	35.9397	19.4178
ausA	TRUE	81	77.2602	68.3855
ausA	TRUE	82	30.0173	15.6228
ausA	TRUE	83	55.2439	22.3157
ausA	TRUE	84	54.0143	20.8668
ausA	TRUE	85	29.2401	15.55
ausA	TRUE	86	77.2602	68.3855
ausA	TRUE	87	54.6451	22.3157
ausA	TRUE	88	33.993	19.4178
ausA	TRUE	89	64.1737	22.3157
ausA	TRUE	90	48.0763	20.8668
ausA	TRUE	91	50.3758	22.3157
ausA	TRUE	92	57.9598	27.7793
ausA	TRUE	93	29.636	15.55
ausA	TRUE	94	36.9273	20.8668
ausA	TRUE	95	37.1633	20.8668
ausA	TRUE	96	30.108	19.4178
ausA	TRUE	97	34.2031	19.4178
ausA	TRUE	98	31.561	17.7187
ausA	TRUE	99	64.401	22.3157
ausA	TRUE	100	59.3383	28.7386
cydA	FALSE	1	29.1419	12.8034
cydA	FALSE	2	33.9243	15.1389
cydA	FALSE	3	30.404	15.1389
cydA	FALSE	4	28.7116	17.3031
cydA	FALSE	5	37.1932	18.7354
cydA	FALSE	6	29.771	15.0066
cydA	FALSE	7	32.5903	17.3031
cydA	FALSE	8	34.7836	18.3952
cydA	FALSE	9	31.6858	15.1389
cydA	FALSE	10	32.4696	18.5632
cydA	FALSE	11	31.9845	19.0766
cydA	FALSE	12	32.7493	16.221
cydA	FALSE	13	29.1923	12.7306
cydA	FALSE	14	29.1429	15.0066
cydA	FALSE	15	31.9973	15.7626
cydA	FALSE	16	28.3412	13.779
cydA	FALSE	17	30.2624	15.0727
cydA	FALSE	18	30.3711	15.7626
cydA	FALSE	19	38.9537	20.6942
cydA	FALSE	20	34.551	17.2784
cydA	FALSE	21	33.8604	17.3031
cydA	FALSE	22	34.6942	18.4131
cydA	FALSE	23	29.8449	17.0406
cydA	FALSE	24	29.402	17.3997
cydA	FALSE	25	30.7297	14.4653
cydA	FALSE	26	33.9246	19.6904
cydA	FALSE	27	32.5537	15.0727
cydA	FALSE	28	34.0657	15.1389
cydA	FALSE	29	37.4947	19.8051
cydA	FALSE	30	34.2793	18.3605
cydA	FALSE	31	32.5799	18.5653
cydA	FALSE	32	27.8598	14.4653
cydA	FALSE	33	30.6303	19.4178
cydA	FALSE	34	33.0235	15.1389
cydA	FALSE	35	33.6055	15.0066
cydA	FALSE	36	28.2983	15.0727
cydA	FALSE	37	29.8666	15.1389
cydA	FALSE	38	29.6176	13.489
cydA	FALSE	39	34.0311	15.0727
cydA	FALSE	40	30.0731	14.4653
cydA	FALSE	41	29.669	14.4653
cydA	FALSE	42	27.7936	13.9241
cydA	FALSE	43	32.5693	15.1389
cydA	FALSE	44	31.7174	16.3863
cydA	FALSE	45	33.2585	18.7354
cydA	FALSE	46	28.0366	13.9241
cydA	FALSE	47	33.892	15.1389
cydA	FALSE	48	32.8508	17.2582
cydA	FALSE	49	32.7317	15.1389
cydA	FALSE	50	32.8293	18.7354
cydA	FALSE	51	31.0859	16.3863
cydA	FALSE	52	29.0053	18.7354
cydA	FALSE	53	32.0564	16.3863
cydA	FALSE	54	35.5345	17.3031
cydA	FALSE	55	35.4208	15.0727
cydA	FALSE	56	28.0274	13.8516
cydA	FALSE	57	31.6753	18.7354
cydA	FALSE	58	29.8811	14.4653
cydA	FALSE	59	33.1125	15.0727
cydA	FALSE	60	34.3441	16.3863
cydA	FALSE	61	33.191	15.1389
cydA	FALSE	62	35.73	19.0766
cydA	FALSE	63	30.4434	16.3818
cydA	FALSE	64	35.1791	19.4178
cydA	FALSE	65	30.7432	15.0066
cydA	FALSE	66	28.4072	17.3031
cydA	FALSE	67	29.5099	15.0727
cydA	FALSE	68	31.6734	15.0727
cydA	FALSE	69	30.2531	16.9788
cydA	FALSE	70	30.4423	15.3417
cydA	FALSE	71	35.1123	15.0066
cydA	FALSE	72	35.9926	19.7421
cydA	FALSE	73	33.4504	15.1389
cydA	FALSE	74	31.1672	19.2014
cydA	FALSE	75	28.9061	15.1389
cydA	FALSE	76	32.5773	13.9241
cydA	FALSE	77	32.0091	13.779
cydA	FALSE	78	34.6254	17.3031
cydA	FALSE	79	26.3641	14.4653
cydA	FALSE	80	30.0226	14.4653
cydA	FALSE	81	36.3782	15.1389
cydA	FALSE	82	26.8179	15.7626
cydA	FALSE	83	31.7072	16.0196
cydA	FALSE	84	33.349	17.2582
cydA	FALSE	85	27.3169	12.9882
cydA	FALSE	86	34.5038	16.8447
cydA	FALSE	87	35.4683	15.0727
cydA	FALSE	88	29.9253	14.4653
cydA	FALSE	89	34.1601	15.0066
cydA	FALSE	90	32.6356	14.4653
cydA	FALSE	91	33.8472	18.7354
cydA	FALSE	92	35.3861	15.0727
cydA	FALSE	93	30.1618	15.0727
cydA	FALSE	94	31.6106	17.2784
cydA	FALSE	95	31.9083	15.9461
cydA	FALSE	96	31.2828	15.0727
cydA	FALSE	97	28.8822	15.0727
cydA	FALSE	98	30.6698	19.4178
cydA	FALSE	99	35.6071	18.0192
cydA	FALSE	100	34.1373	15.7626
cydA	TRUE	1	47.7002	47.7002
cydA	TRUE	3	2.24833	2.24833
cydA	TRUE	4	25.6819	25.6819
cydA	TRUE	5	2.24833	2.24833
cydA	TRUE	6	33.12	33.12
cydA	TRUE	8	20.3005	20.3005
cydA	TRUE	9	3.42048	3.42048
cydA	TRUE	10	36.0567	36.0567
cydA	TRUE	11	2.24833	2.24833
cydA	TRUE	12	32.5228	32.5228
cydA	TRUE	14	2.24833	2.24833
cydA	TRUE	15	10.0902	10.0902
cydA	TRUE	17	2.24833	2.24833
cydA	TRUE	21	21.3693	21.3693
cydA	TRUE	23	25.6819	25.6819
cydA	TRUE	24	21.3693	21.3693
cydA	TRUE	26	76.0727	76.0727
cydA	TRUE	27	23.087	23.087
cydA	TRUE	28	27.9302	27.9302
cydA	TRUE	29	135.776	135.776
cydA	TRUE	30	2.24833	2.24833
cydA	TRUE	31	0.896317	0.896317
cydA	TRUE	32	21.3693	21.3693
cydA	TRUE	33	18.6786	18.6786
cydA	TRUE	34	41.9286	41.9286
cydA	TRUE	36	91.9219	91.9219
cydA	TRUE	37	15.5374	15.5374
cydA	TRUE	40	15.5374	15.5374
cydA	TRUE	43	57.3632	57.3632
cydA	TRUE	44	11.406	11.406
cydA	TRUE	45	6.11118	6.11118
cydA	TRUE	46	62.5223	62.5223
cydA	TRUE	47	88.4559	88.4559
cydA	TRUE	50	22.5488	22.5488
cydA	TRUE	52	46.3302	46.3302
cydA	TRUE	53	12.8467	12.8467
cydA	TRUE	54	33.12	33.12
cydA	TRUE	55	118.518	118.518
cydA	TRUE	56	41.9286	41.9286
cydA	TRUE	58	2.24833	2.24833
cydA	TRUE	59	57.769	57.769
cydA	TRUE	60	2.24833	2.24833
cydA	TRUE	62	33.12	33.12
cydA	TRUE	63	63.039	63.039
cydA	TRUE	64	2.24833	2.24833
cydA	TRUE	66	70.7678	70.7678
cydA	TRUE	67	15.5374	15.5374
cydA	TRUE	68	2.24833	2.24833
cydA	TRUE	69	18.6786	18.6786
cydA	TRUE	71	17.5027	17.5027
cydA	TRUE	72	2.24833	2.24833
cydA	TRUE	73	0.896317	0.896317
cydA	TRUE	74	56.0884	56.0884
cydA	TRUE	75	16.529	16.529
cydA	TRUE	76	63.039	63.039
cydA	TRUE	77	15.5374	15.5374
cydA	TRUE	78	18.6786	18.6786
cydA	TRUE	79	8.1651	8.1651
cydA	TRUE	80	12.5903	12.5903
cydA	TRUE	81	26.681	26.681
cydA	TRUE	82	6.11118	6.11118
cydA	TRUE	83	18.6786	18.6786
cydA	TRUE	84	33.12	33.12
cydA	TRUE	85	91.9219	91.9219
cydA	TRUE	87	18.6786	18.6786
cydA	TRUE	88	91.9219	91.9219
cydA	TRUE	89	111.196	111.196
cydA	TRUE	90	18.6786	18.6786
cydA	TRUE	92	0.536435	0.536435
cydA	TRUE	93	12.8467	12.8467
cydA	TRUE	95	15.5709	15.5709
cydA	TRUE	96	33.12	33.12
cydA	TRUE	98	27.9302	27.9302
cydA	TRUE	99	20.2075	20.2075
cydA	TRUE	100	0.896317	0.896317
ebpS	FALSE	1	29.5735	13.779
ebpS	FALSE	2	33.9243	15.1389
ebpS	FALSE	3	30.404	15.1389
ebpS	FALSE	4	28.6485	18.0192
ebpS	FALSE	5	37.1932	18.7354
ebpS	FALSE	6	30.4554	15.0727
ebpS	FALSE	7	32.5903	17.3031
ebpS	FALSE	8	34.4687	18.9065
ebpS	FALSE	9	31.0968	15.0727
ebpS	FALSE	10	32.5493	18.7354
ebpS	FALSE	11	31.9845	19.0766
ebpS	FALSE	12	32.7493	16.221
ebpS	FALSE	13	29.1923	12.7306
ebpS	FALSE	14	29.1429	15.0066
ebpS	FALSE	15	31.5312	15.1389
ebpS	FALSE	16	28.3412	13.779
ebpS	FALSE	17	30.2624	15.0727
ebpS	FALSE	18	30.3711	15.7626
ebpS	FALSE	19	38.9537	20.6942
ebpS	FALSE	20	34.551	17.2784
ebpS	FALSE	21	34.0111	17.4639
ebpS	FALSE	22	34.6942	18.4131
ebpS	FALSE	23	29.76	18.7354
ebpS	FALSE	24	29.6282	18.4131
ebpS	FALSE	25	30.7297	14.4653
ebpS	FALSE	26	34.8214	19.9629
ebpS	FALSE	27	32.2832	15.1389
ebpS	FALSE	28	34.0657	15.1389
ebpS	FALSE	29	39.6312	20.2497
ebpS	FALSE	30	34.2793	18.3605
ebpS	FALSE	31	31.8647	18.3952
ebpS	FALSE	32	28.0895	15.0066
ebpS	FALSE	33	30.7164	19.6115
ebpS	FALSE	34	33.2709	16.221
ebpS	FALSE	35	33.6055	15.0066
ebpS	FALSE	36	28.2983	15.0727
ebpS	FALSE	37	29.242	15.1389
ebpS	FALSE	38	29.6176	13.489
ebpS	FALSE	39	34.0311	15.0727
ebpS	FALSE	40	30.0496	15.0066
ebpS	FALSE	41	29.669	14.4653
ebpS	FALSE	42	27.7936	13.9241
ebpS	FALSE	43	32.5693	15.1389
ebpS	FALSE	44	31.2943	16.2029
ebpS	FALSE	45	32.7734	18.0192
ebpS	FALSE	46	28.755	14.4653
ebpS	FALSE	47	35.1912	15.7626
ebpS	FALSE	48	32.8508	17.2582
ebpS	FALSE	49	32.7317	15.1389
ebpS	FALSE	50	32.8293	18.7354
ebpS	FALSE	51	31.0859	16.3863
ebpS	FALSE	52	29.3991	19.0766
ebpS	FALSE	53	31.9079	17.5608
ebpS	FALSE	54	36.1036	18.0192
ebpS	FALSE	55	37.2674	15.1389
ebpS	FALSE	56	28.3232	13.9241
ebpS	FALSE	57	31.6753	18.7354
ebpS	FALSE	58	29.8811	14.4653
ebpS	FALSE	59	33.6604	15.1389
ebpS	FALSE	60	34.3441	16.3863
ebpS	FALSE	61	33.191	15.1389
ebpS	FALSE	62	35.7063	19.0766
ebpS	FALSE	63	30.4434	16.3818
ebpS	FALSE	64	35.1791	19.4178
ebpS	FALSE	65	30.7432	15.0066
ebpS	FALSE	66	29.3281	18.0192
ebpS	FALSE	67	29.496	15.1389
ebpS	FALSE	68	32.1561	15.1389
ebpS	FALSE	69	30.3484	18.4131
ebpS	FALSE	70	30.4423	15.3417
ebpS	FALSE	71	34.6231	15.0727
ebpS	FALSE	72	35.9926	19.7421
ebpS	FALSE	73	32.7722	15.0727
ebpS	FALSE	74	31.721	19.4178
ebpS	FALSE	75	28.6114	15.7626
ebpS	FALSE	76	32.5773	13.9241
ebpS	FALSE	77	31.9367	13.8516
ebpS	FALSE	78	34.6355	18.0192
ebpS	FALSE	79	26.3641	14.4653
ebpS	FALSE	80	29.6517	13.9241
ebpS	FALSE	81	36.093	16.221
ebpS	FALSE	82	26.4877	15.1389
ebpS	FALSE	83	31.778	16.2029
ebpS	FALSE	84	33.9618	17.2806
ebpS	FALSE	85	27.3169	12.9882
ebpS	FALSE	86	34.5038	16.8447
ebpS	FALSE	87	35.4586	15.1389
ebpS	FALSE	88	29.9253	14.4653
ebpS	FALSE	89	35.9943	15.0727
ebpS	FALSE	90	32.6882	15.0066
ebpS	FALSE	91	33.8472	18.7354
ebpS	FALSE	92	34.5361	15.0066
ebpS	FALSE	93	30.0351	15.1389
ebpS	FALSE	94	31.6106	17.2784
ebpS	FALSE	95	31.5531	15.7585
ebpS	FALSE	96	32.0097	15.1389
ebpS	FALSE	97	28.8822	15.0727
ebpS	FALSE	98	30.6698	19.4178
ebpS	FALSE	99	35.6071	18.0192
ebpS	FALSE	100	33.3986	15.1389
ebpS	TRUE	3	2.24833	2.24833
ebpS	TRUE	5	2.24833	2.24833
ebpS	TRUE	6	2.24833	2.24833
ebpS	TRUE	9	2.24833	2.24833
ebpS	TRUE	11	2.24833	2.24833
ebpS	TRUE	12	32.5228	32.5228
ebpS	TRUE	14	2.24833	2.24833
ebpS	TRUE	17	2.24833	2.24833
ebpS	TRUE	21	2.24833	2.24833
ebpS	TRUE	24	2.24833	2.24833
ebpS	TRUE	28	27.9302	27.9302
ebpS	TRUE	30	2.24833	2.24833
ebpS	TRUE	31	34.2614	34.2614
ebpS	TRUE	32	2.24833	2.24833
ebpS	TRUE	33	2.24833	2.24833
ebpS	TRUE	36	91.9219	91.9219
ebpS	TRUE	37	31.4626	31.4626
ebpS	TRUE	40	2.24833	2.24833
ebpS	TRUE	43	57.3632	57.3632
ebpS	TRUE	45	2.24833	2.24833
ebpS	TRUE	50	22.5488	22.5488
ebpS	TRUE	53	2.24833	2.24833
ebpS	TRUE	54	2.24833	2.24833
ebpS	TRUE	58	2.24833	2.24833
ebpS	TRUE	60	2.24833	2.24833
ebpS	TRUE	62	33.6647	33.6647
ebpS	TRUE	63	63.039	63.039
ebpS	TRUE	64	2.24833	2.24833
ebpS	TRUE	67	2.24833	2.24833
ebpS	TRUE	68	7.54868	7.54868
ebpS	TRUE	69	2.24833	2.24833
ebpS	TRUE	72	2.24833	2.24833
ebpS	TRUE	76	63.039	63.039
ebpS	TRUE	77	2.24833	2.24833
ebpS	TRUE	78	2.24833	2.24833
ebpS	TRUE	79	8.1651	8.1651
ebpS	TRUE	82	2.24833	2.24833
ebpS	TRUE	83	2.24833	2.24833
ebpS	TRUE	84	2.24833	2.24833
ebpS	TRUE	85	91.9219	91.9219
ebpS	TRUE	87	2.24833	2.24833
ebpS	TRUE	88	91.9219	91.9219
ebpS	TRUE	90	2.24833	2.24833
ebpS	TRUE	93	2.24833	2.24833
ebpS	TRUE	96	2.24833	2.24833
ebpS	TRUE	98	27.9302	27.9302
ebpS	TRUE	99	20.2075	20.2075
fmtB	FALSE	1	28.1351	13.779
fmtB	FALSE	2	32.749	15.1389
fmtB	FALSE	3	27.3356	14.4653
fmtB	FALSE	4	26.6104	17.3031
fmtB	FALSE	5	34.7083	18.3952
fmtB	FALSE	6	28.6227	15.0066
fmtB	FALSE	7	31.8348	17.3031
fmtB	FALSE	8	33.1452	18.9065
fmtB	FALSE	9	28.043	13.9241
fmtB	FALSE	10	29.9952	18.391
fmtB	FALSE	11	29.9066	17.5608
fmtB	FALSE	12	30.1919	15.1389
fmtB	FALSE	13	27.77	12.7306
fmtB	FALSE	14	27.2574	14.4653
fmtB	FALSE	15	29.2672	15.0066
fmtB	FALSE	16	26.1445	11.6822
fmtB	FALSE	17	28.0575	14.4653
fmtB	FALSE	18	28.5821	15.1389
fmtB	FALSE	19	36.7761	18.5212
fmtB	FALSE	20	32.8299	15.1389
fmtB	FALSE	21	31.0185	16.3863
fmtB	FALSE	22	32.8896	17.8356
fmtB	FALSE	23	28.0354	17.0406
fmtB	FALSE	24	27.2397	16.2029
fmtB	FALSE	25	28.6761	14.4653
fmtB	FALSE	26	32.8189	19.4178
fmtB	FALSE	27	29.8664	15.0727
fmtB	FALSE	28	32.4535	15.1389
fmtB	FALSE	29	39.3413	20.2497
fmtB	FALSE	30	32.2649	17.3031
fmtB	FALSE	31	30.3548	17.3907
fmtB	FALSE	32	26.0494	13.9241
fmtB	FALSE	33	28.4368	18.3605
fmtB	FALSE	34	31.7538	16.221
fmtB	FALSE	35	31.7884	15.0066
fmtB	FALSE	36	27.6813	15.0727
fmtB	FALSE	37	27.5967	15.0727
fmtB	FALSE	38	28.3935	13.1989
fmtB	FALSE	39	32.7796	15.0727
fmtB	FALSE	40	27.8518	13.9241
fmtB	FALSE	41	28.1681	14.4653
fmtB	FALSE	42	25.4317	13.3836
fmtB	FALSE	43	31.906	15.9337
fmtB	FALSE	44	29.8185	15.7626
fmtB	FALSE	45	30.9964	16.6246
fmtB	FALSE	46	26.7957	13.9241
fmtB	FALSE	47	33.6197	15.1389
fmtB	FALSE	48	30.9601	16.8222
fmtB	FALSE	49	30.6703	15.0066
fmtB	FALSE	50	31.9187	19.4178
fmtB	FALSE	51	29.7233	16.3863
fmtB	FALSE	52	28.6181	19.4178
fmtB	FALSE	53	30.4749	16.3863
fmtB	FALSE	54	33.9535	16.221
fmtB	FALSE	55	35.6993	15.0727
fmtB	FALSE	56	27.952	15.0066
fmtB	FALSE	57	29.5008	18.0192
fmtB	FALSE	58	27.6762	13.9241
fmtB	FALSE	59	31.9115	15.0727
fmtB	FALSE	60	31.4271	15.0727
fmtB	FALSE	61	31.7128	15.1389
fmtB	FALSE	62	33.9958	18.7354
fmtB	FALSE	63	30.0491	16.3818
fmtB	FALSE	64	32.5226	15.7626
fmtB	FALSE	65	28.7859	14.4653
fmtB	FALSE	66	27.8456	18.0192
fmtB	FALSE	67	26.842	14.4653
fmtB	FALSE	68	29.2823	15.0066
fmtB	FALSE	69	28.0731	15.5445
fmtB	FALSE	70	28.1802	15.0727
fmtB	FALSE	71	33.1856	15.0727
fmtB	FALSE	72	33.9231	19.0766
fmtB	FALSE	73	31.6292	15.0727
fmtB	FALSE	74	29.3605	18.9849
fmtB	FALSE	75	26.5177	15.1389
fmtB	FALSE	76	31.9851	14.4653
fmtB	FALSE	77	29.9847	13.779
fmtB	FALSE	78	32.4081	16.8447
fmtB	FALSE	79	24.3871	13.9241
fmtB	FALSE	80	27.284	13.3836
fmtB	FALSE	81	34.3746	16.221
fmtB	FALSE	82	24.2875	15.0066
fmtB	FALSE	83	28.8687	15.1389
fmtB	FALSE	84	31.7177	16.8222
fmtB	FALSE	85	26.8813	12.9882
fmtB	FALSE	86	31.9651	15.1389
fmtB	FALSE	87	32.9734	15.0727
fmtB	FALSE	88	29.2646	14.4653
fmtB	FALSE	89	33.4626	14.4653
fmtB	FALSE	90	30.3008	13.9241
fmtB	FALSE	91	32.8155	18.7354
fmtB	FALSE	92	33.2784	15.0066
fmtB	FALSE	93	27.0869	13.9241
fmtB	FALSE	94	29.6843	15.1389
fmtB	FALSE	95	30.1623	15.3549
fmtB	FALSE	96	29.7755	15.0066
fmtB	FALSE	97	27.4846	15.0066
fmtB	FALSE	98	29.7076	20.6942
fmtB	FALSE	99	33.9476	18.7354
fmtB	FALSE	100	31.4726	15.0066
fmtB	TRUE	1	59.0613	59.0613
fmtB	TRUE	2	59.1916	59.1916
fmtB	TRUE	3	60.185	56.7828
fmtB	TRUE	4	59.22	50.4856
fmtB	TRUE	5	61.1621	56.3119
fmtB	TRUE	6	44.9385	31.6023
fmtB	TRUE	7	40.3345	22.3943
fmtB	TRUE	8	63.5872	63.5872
fmtB	TRUE	9	85.3836	85.3836
fmtB	TRUE	10	58.7284	53.8696
fmtB	TRUE	11	114.455	114.455
fmtB	TRUE	12	60.185	56.7828
fmtB	TRUE	13	59.0613	59.0613
fmtB	TRUE	14	59.0613	59.0613
fmtB	TRUE	15	82.4704	82.4704
fmtB	TRUE	16	56.3485	49.1099
fmtB	TRUE	17	56.2027	50.4856
fmtB	TRUE	18	114.455	114.455
fmtB	TRUE	19	70.8917	56.3119
fmtB	TRUE	20	59.22	50.4856
fmtB	TRUE	21	82.4704	82.4704
fmtB	TRUE	22	61.1621	56.3119
fmtB	TRUE	23	56.2027	50.4856
fmtB	TRUE	24	73.2624	73.2624
fmtB	TRUE	25	63.5872	63.5872
fmtB	TRUE	26	56.3485	49.1099
fmtB	TRUE	27	114.455	114.455
fmtB	TRUE	28	56.2027	50.4856
fmtB	TRUE	29	42.6756	27.0764
fmtB	TRUE	30	63.5872	63.5872
fmtB	TRUE	31	57.6205	56.3119
fmtB	TRUE	32	114.455	114.455
fmtB	TRUE	33	59.22	50.4856
fmtB	TRUE	34	59.0613	59.0613
fmtB	TRUE	35	63.5872	63.5872
fmtB	TRUE	36	58.1448	56.3119
fmtB	TRUE	37	58.1448	56.3119
fmtB	TRUE	38	44.714	16.0196
fmtB	TRUE	39	59.0613	59.0613
fmtB	TRUE	40	58.1448	56.3119
fmtB	TRUE	41	58.187	58.187
fmtB	TRUE	42	62.4352	50.4856
fmtB	TRUE	43	46.3951	34.5155
fmtB	TRUE	44	65.2374	65.2374
fmtB	TRUE	45	49.8463	22.3647
fmtB	TRUE	46	58.1448	56.3119
fmtB	TRUE	47	55.6198	50.4856
fmtB	TRUE	48	58.0604	50.4856
fmtB	TRUE	49	54.892	46.1967
fmtB	TRUE	50	42.4542	9.24021
fmtB	TRUE	51	61.7459	61.7459
fmtB	TRUE	52	40.0723	3.66723
fmtB	TRUE	53	44.1973	30.1199
fmtB	TRUE	54	59.22	50.4856
fmtB	TRUE	55	59.22	50.4856
fmtB	TRUE	56	32.3133	6.35188
fmtB	TRUE	57	59.22	50.4856
fmtB	TRUE	58	59.0613	59.0613
fmtB	TRUE	59	58.1448	56.3119
fmtB	TRUE	60	82.4704	82.4704
fmtB	TRUE	61	59.0613	59.0613
fmtB	TRUE	62	60.0025	56.3119
fmtB	TRUE	63	46.8291	22.3647
fmtB	TRUE	64	82.4704	82.4704
fmtB	TRUE	65	58.1448	56.3119
fmtB	TRUE	66	44.8946	31.6023
fmtB	TRUE	67	53.2054	42.8236
fmtB	TRUE	68	63.5872	63.5872
fmtB	TRUE	69	58.1448	56.3119
fmtB	TRUE	70	82.4704	82.4704
fmtB	TRUE	71	59.0613	59.0613
fmtB	TRUE	72	48.2827	41.9079
fmtB	TRUE	73	59.0613	59.0613
fmtB	TRUE	74	82.4704	82.4704
fmtB	TRUE	75	114.455	114.455
fmtB	TRUE	76	59.0613	59.0613
fmtB	TRUE	77	59.0613	59.0613
fmtB	TRUE	78	57.9925	50.4856
fmtB	TRUE	79	61.7459	61.7459
fmtB	TRUE	80	64.3773	56.3119
fmtB	TRUE	81	63.5872	63.5872
fmtB	TRUE	82	114.455	114.455
fmtB	TRUE	83	85.3836	85.3836
fmtB	TRUE	84	114.455	114.455
fmtB	TRUE	85	44.3324	41.9079
fmtB	TRUE	86	70.8917	56.3119
fmtB	TRUE	87	63.5872	63.5872
fmtB	TRUE	88	61.1621	56.3119
fmtB	TRUE	89	60.0451	56.503
fmtB	TRUE	90	114.455	114.455
fmtB	TRUE	91	44.9385	31.6023
fmtB	TRUE	92	59.0613	59.0613
fmtB	TRUE	93	70.8917	56.3119
fmtB	TRUE	94	59.22	50.4856
fmtB	TRUE	95	46.1569	33.2526
fmtB	TRUE	96	54.112	35.1616
fmtB	TRUE	97	49.8463	22.3647
fmtB	TRUE	98	45.4715	12.719
fmtB	TRUE	99	63.5872	63.5872
fmtB	TRUE	100	74.8085	74.8085
fnbA	FALSE	1	29.5735	13.779
fnbA	FALSE	2	33.9243	15.1389
fnbA	FALSE	3	30.4406	15.1389
fnbA	FALSE	4	28.3258	17.3031
fnbA	FALSE	5	36.9803	18.7354
fnbA	FALSE	6	29.2206	14.4653
fnbA	FALSE	7	32.5903	17.3031
fnbA	FALSE	8	34.9719	19.4178
fnbA	FALSE	9	31.4729	15.1389
fnbA	FALSE	10	32.4696	18.5632
fnbA	FALSE	11	32.0191	19.0766
fnbA	FALSE	12	32.7493	16.221
fnbA	FALSE	13	28.4574	11.6822
fnbA	FALSE	14	29.1826	15.0066
fnbA	FALSE	15	31.5312	15.1389
fnbA	FALSE	16	29.3002	13.9241
fnbA	FALSE	17	30.7141	15.0727
fnbA	FALSE	18	30.499	15.1389
fnbA	FALSE	19	37.7905	20.056
fnbA	FALSE	20	35.1972	19.4178
fnbA	FALSE	21	33.3052	17.3031
fnbA	FALSE	22	34.8435	17.8356
fnbA	FALSE	23	29.76	18.7354
fnbA	FALSE	24	30.038	18.5742
fnbA	FALSE	25	31.495	15.0066
fnbA	FALSE	26	34.8214	19.9629
fnbA	FALSE	27	33.3742	15.1389
fnbA	FALSE	28	33.9379	16.221
fnbA	FALSE	29	39.6312	20.2497
fnbA	FALSE	30	33.6648	16.3244
fnbA	FALSE	31	32.3613	18.5653
fnbA	FALSE	32	28.5429	15.0727
fnbA	FALSE	33	30.7523	19.6115
fnbA	FALSE	34	33.2709	16.221
fnbA	FALSE	35	34.1777	15.0727
fnbA	FALSE	36	28.2983	15.0727
fnbA	FALSE	37	29.7845	16.9371
fnbA	FALSE	38	29.6176	13.489
fnbA	FALSE	39	34.0311	15.0727
fnbA	FALSE	40	30.0848	15.0066
fnbA	FALSE	41	30.2897	14.4653
fnbA	FALSE	42	26.4484	13.8516
fnbA	FALSE	43	33.0651	15.9337
fnbA	FALSE	44	31.2943	16.2029
fnbA	FALSE	45	32.6125	18.0192
fnbA	FALSE	46	28.755	14.4653
fnbA	FALSE	47	35.1912	15.7626
fnbA	FALSE	48	32.8508	17.2582
fnbA	FALSE	49	32.2234	15.1389
fnbA	FALSE	50	33.2087	19.4178
fnbA	FALSE	51	31.7535	16.8447
fnbA	FALSE	52	29.8077	19.4178
fnbA	FALSE	53	32.293	18.7354
fnbA	FALSE	54	35.5726	17.3031
fnbA	FALSE	55	37.2674	15.1389
fnbA	FALSE	56	28.6818	14.4653
fnbA	FALSE	57	31.6753	18.7354
fnbA	FALSE	58	29.2152	13.8516
fnbA	FALSE	59	33.6604	15.1389
fnbA	FALSE	60	33.6464	15.7626
fnbA	FALSE	61	33.7845	16.9371
fnbA	FALSE	62	35.0176	18.7354
fnbA	FALSE	63	31.6073	17.9264
fnbA	FALSE	64	34.5205	17.9021
fnbA	FALSE	65	30.6468	15.0066
fnbA	FALSE	66	29.3281	18.0192
fnbA	FALSE	67	28.951	15.0727
fnbA	FALSE	68	30.0228	15.0066
fnbA	FALSE	69	30.7561	18.699
fnbA	FALSE	70	31.0819	15.5445
fnbA	FALSE	71	35.4559	15.1389
fnbA	FALSE	72	35.3309	19.4178
fnbA	FALSE	73	33.2178	15.1389
fnbA	FALSE	74	31.721	19.4178
fnbA	FALSE	75	28.6114	15.7626
fnbA	FALSE	76	34.184	15.0066
fnbA	FALSE	77	31.277	13.779
fnbA	FALSE	78	33.9745	17.3031
fnbA	FALSE	79	25.9769	13.9241
fnbA	FALSE	80	30.0392	14.4653
fnbA	FALSE	81	36.093	16.221
fnbA	FALSE	82	26.8553	15.7626
fnbA	FALSE	83	31.1754	16.0196
fnbA	FALSE	84	33.3871	17.2582
fnbA	FALSE	85	28.3124	12.9989
fnbA	FALSE	86	34.2158	16.3863
fnbA	FALSE	87	34.5846	15.0727
fnbA	FALSE	88	30.5282	15.0066
fnbA	FALSE	89	35.9943	15.0727
fnbA	FALSE	90	33.1823	15.0727
fnbA	FALSE	91	33.8472	18.7354
fnbA	FALSE	92	34.5361	15.0066
fnbA	FALSE	93	30.5433	15.7626
fnbA	FALSE	94	32.1913	19.4178
fnbA	FALSE	95	31.5531	15.7585
fnbA	FALSE	96	31.2095	15.0727
fnbA	FALSE	97	29.4887	15.1389
fnbA	FALSE	98	31.7246	21.5049
fnbA	FALSE	99	35.2649	18.7354
fnbA	FALSE	100	33.8888	15.7626
fnbA	TRUE	3	0.380341	0.380341
fnbA	TRUE	4	43.8131	43.8131
fnbA	TRUE	5	11.8277	11.8277
fnbA	TRUE	6	63.9917	63.9917
fnbA	TRUE	8	11.8277	11.8277
fnbA	TRUE	9	8.21016	8.21016
fnbA	TRUE	10	36.0567	36.0567
fnbA	TRUE	11	0.380341	0.380341
fnbA	TRUE	12	32.5228	32.5228
fnbA	TRUE	13	60.7938	60.7938
fnbA	TRUE	14	0.380341	0.380341
fnbA	TRUE	16	2.92786	2.92786
fnbA	TRUE	17	13.697	11.8277
fnbA	TRUE	18	24.3577	24.3577
fnbA	TRUE	19	92.4601	92.4601
fnbA	TRUE	20	5.47538	5.47538
fnbA	TRUE	22	27.8262	27.8262
fnbA	TRUE	24	6.10402	6.10402
fnbA	TRUE	25	5.47538	5.47538
fnbA	TRUE	27	14.2812	14.2812
fnbA	TRUE	30	30.5162	30.5162
fnbA	TRUE	31	11.8277	11.8277
fnbA	TRUE	32	2.92786	2.92786
fnbA	TRUE	33	0.380341	0.380341
fnbA	TRUE	35	14.1498	14.1498
fnbA	TRUE	36	91.9219	91.9219
fnbA	TRUE	37	5.47538	5.47538
fnbA	TRUE	40	0.380341	0.380341
fnbA	TRUE	41	17.8749	17.8749
fnbA	TRUE	42	89.6736	89.6736
fnbA	TRUE	45	9.97403	9.97403
fnbA	TRUE	49	44.1701	44.1701
fnbA	TRUE	50	5.47538	5.47538
fnbA	TRUE	51	0.380341	0.380341
fnbA	TRUE	52	11.8277	11.8277
fnbA	TRUE	53	6.10402	6.10402
fnbA	TRUE	54	32.186	32.186
fnbA	TRUE	56	11.8277	11.8277
fnbA	TRUE	58	28.8829	28.8829
fnbA	TRUE	61	11.8277	11.8277
fnbA	TRUE	62	63.9917	63.9917
fnbA	TRUE	63	11.8277	11.8277
fnbA	TRUE	65	32.8149	32.8149
fnbA	TRUE	68	49.1468	49.1468
fnbA	TRUE	69	6.10402	6.10402
fnbA	TRUE	70	0.380341	0.380341
fnbA	TRUE	71	5.47538	5.47538
fnbA	TRUE	73	11.8277	11.8277
fnbA	TRUE	76	0.380341	0.380341
fnbA	TRUE	80	11.8277	11.8277
fnbA	TRUE	82	5.17719	5.17719
fnbA	TRUE	84	32.186	32.186
fnbA	TRUE	85	32.5926	5.47538
fnbA	TRUE	86	47.4627	47.4627
fnbA	TRUE	88	46.1511	46.1511
fnbA	TRUE	90	6.10402	6.10402
fnbA	TRUE	93	2.92786	2.92786
fnbA	TRUE	94	5.47538	5.47538
fnbA	TRUE	96	34.7335	34.7335
fnbA	TRUE	97	0.380341	0.380341
fnbA	TRUE	98	2.92786	2.92786
fnbA	TRUE	100	11.8277	11.8277
glcA	FALSE	1	26.8559	11.8277
glcA	FALSE	2	31.5954	14.4653
glcA	FALSE	3	29.4925	14.4653
glcA	FALSE	4	27.9686	17.3031
glcA	FALSE	5	34.063	16.767
glcA	FALSE	6	29.2884	14.4653
glcA	FALSE	7	30.6817	16.221
glcA	FALSE	8	32.1589	16.767
glcA	FALSE	9	28.0641	13.8516
glcA	FALSE	10	31.9117	18.5632
glcA	FALSE	11	29.2875	16.3863
glcA	FALSE	12	30.2627	15.1389
glcA	FALSE	13	27.0427	10.8274
glcA	FALSE	14	26.851	13.9241
glcA	FALSE	15	29.0748	14.4653
glcA	FALSE	16	26.1924	12.719
glcA	FALSE	17	29.5458	15.0066
glcA	FALSE	18	27.8401	15.0727
glcA	FALSE	19	37.3325	20.056
glcA	FALSE	20	32.0949	15.0727
glcA	FALSE	21	31.7335	16.3863
glcA	FALSE	22	32.7646	16.1985
glcA	FALSE	23	27.2568	15.3458
glcA	FALSE	24	29.0806	17.3997
glcA	FALSE	25	30.7297	14.4653
glcA	FALSE	26	32.4319	19.4178
glcA	FALSE	27	29.9983	15.0727
glcA	FALSE	28	31.5619	15.0727
glcA	FALSE	29	37.5561	19.6115
glcA	FALSE	30	31.3006	15.3458
glcA	FALSE	31	31.3858	17.3907
glcA	FALSE	32	25.3679	13.779
glcA	FALSE	33	28.0182	17.3031
glcA	FALSE	34	33.2709	16.221
glcA	FALSE	35	33.6055	15.0066
glcA	FALSE	36	29.0101	15.0727
glcA	FALSE	37	27.1313	15.0066
glcA	FALSE	38	29.6176	13.489
glcA	FALSE	39	33.383	15.0066
glcA	FALSE	40	27.2636	13.8516
glcA	FALSE	41	29.669	14.4653
glcA	FALSE	42	27.0804	13.8516
glcA	FALSE	43	30.8893	15.0727
glcA	FALSE	44	28.9453	15.1389
glcA	FALSE	45	29.749	15.9461
glcA	FALSE	46	26.8764	13.8516
glcA	FALSE	47	33.2064	15.1389
glcA	FALSE	48	32.1901	16.8222
glcA	FALSE	49	30.396	15.0066
glcA	FALSE	50	31.9837	18.7354
glcA	FALSE	51	28.5304	15.1389
glcA	FALSE	52	28.6734	18.7354
glcA	FALSE	53	29.5147	15.5445
glcA	FALSE	54	34.5345	17.3031
glcA	FALSE	55	35.2726	14.4653
glcA	FALSE	56	25.6449	13.779
glcA	FALSE	57	31.6753	18.7354
glcA	FALSE	58	29.2071	13.9241
glcA	FALSE	59	33.0481	15.0727
glcA	FALSE	60	31.2991	15.0727
glcA	FALSE	61	31.0583	15.0727
glcA	FALSE	62	33.4619	17.5608
glcA	FALSE	63	28.9132	15.0727
glcA	FALSE	64	32.2678	15.7626
glcA	FALSE	65	28.2824	13.8516
glcA	FALSE	66	27.5361	17.3031
glcA	FALSE	67	28.3051	15.0066
glcA	FALSE	68	28.9804	14.4653
glcA	FALSE	69	29.2042	15.5445
glcA	FALSE	70	29.8006	15.1389
glcA	FALSE	71	32.2818	15.0066
glcA	FALSE	72	33.1573	18.7354
glcA	FALSE	73	30.3455	14.4653
glcA	FALSE	74	29.0762	18.9849
glcA	FALSE	75	27.8312	15.1389
glcA	FALSE	76	31.374	13.9241
glcA	FALSE	77	29.4885	13.489
glcA	FALSE	78	31.8515	16.1662
glcA	FALSE	79	25.2242	13.8516
glcA	FALSE	80	27.1791	13.779
glcA	FALSE	81	33.6543	15.1389
glcA	FALSE	82	25.7099	15.0727
glcA	FALSE	83	31.1754	16.0196
glcA	FALSE	84	31.2198	16.3863
glcA	FALSE	85	26.2903	12.8536
glcA	FALSE	86	32.1956	15.7626
glcA	FALSE	87	34.5846	15.0727
glcA	FALSE	88	28.9309	13.9241
glcA	FALSE	89	35.3473	15.0066
glcA	FALSE	90	30.2559	13.9241
glcA	FALSE	91	31.8778	18.0192
glcA	FALSE	92	32.9564	13.9241
glcA	FALSE	93	28.9341	15.0066
glcA	FALSE	94	31.5105	17.2784
glcA	FALSE	95	29.1107	15.3549
glcA	FALSE	96	30.7129	15.0066
glcA	FALSE	97	28.2074	15.0066
glcA	FALSE	98	28.2984	19.0766
glcA	FALSE	99	32.9384	17.3031
glcA	FALSE	100	31.5558	15.0727
glcA	TRUE	1	85.2853	85.2853
glcA	TRUE	2	66.5282	60.6017
glcA	TRUE	3	39.1132	39.1132
glcA	TRUE	4	60.6017	60.6017
glcA	TRUE	5	88.5849	88.5849
glcA	TRUE	6	60.6017	60.6017
glcA	TRUE	7	116.568	116.568
glcA	TRUE	8	85.2853	85.2853
glcA	TRUE	9	65.9605	60.6017
glcA	TRUE	10	60.6017	60.6017
glcA	TRUE	11	88.5849	88.5849
glcA	TRUE	12	88.5849	88.5849
glcA	TRUE	13	74.3346	74.3346
glcA	TRUE	14	109.969	109.969
glcA	TRUE	15	67.5573	60.6017
glcA	TRUE	16	85.2853	85.2853
glcA	TRUE	17	33.8127	33.8127
glcA	TRUE	18	88.5849	88.5849
glcA	TRUE	19	62.7318	60.6017
glcA	TRUE	20	88.5849	88.5849
glcA	TRUE	21	67.0964	67.0964
glcA	TRUE	22	62.9946	60.6017
glcA	TRUE	23	88.5849	88.5849
glcA	TRUE	26	88.5849	88.5849
glcA	TRUE	27	109.969	109.969
glcA	TRUE	28	88.5849	88.5849
glcA	TRUE	29	85.2853	85.2853
glcA	TRUE	30	85.2853	85.2853
glcA	TRUE	31	60.6017	60.6017
glcA	TRUE	32	67.5573	60.6017
glcA	TRUE	33	85.2853	85.2853
glcA	TRUE	36	60.6017	60.6017
glcA	TRUE	37	85.2853	85.2853
glcA	TRUE	39	60.6017	60.6017
glcA	TRUE	40	88.5849	88.5849
glcA	TRUE	42	60.6017	60.6017
glcA	TRUE	43	85.2853	85.2853
glcA	TRUE	44	66.5282	60.6017
glcA	TRUE	45	88.5849	88.5849
glcA	TRUE	46	71.9634	71.9634
glcA	TRUE	47	116.568	116.568
glcA	TRUE	48	60.6017	60.6017
glcA	TRUE	49	85.2853	85.2853
glcA	TRUE	50	60.6017	60.6017
glcA	TRUE	51	88.5849	88.5849
glcA	TRUE	52	60.6017	60.6017
glcA	TRUE	53	85.2853	85.2853
glcA	TRUE	54	57.6178	57.6178
glcA	TRUE	55	65.1943	60.6017
glcA	TRUE	56	88.5849	88.5849
glcA	TRUE	59	60.6017	60.6017
glcA	TRUE	60	85.2853	85.2853
glcA	TRUE	61	109.969	109.969
glcA	TRUE	62	85.2853	85.2853
glcA	TRUE	63	62.7318	60.6017
glcA	TRUE	64	88.5849	88.5849
glcA	TRUE	65	65.1943	60.6017
glcA	TRUE	66	109.969	109.969
glcA	TRUE	67	60.6017	60.6017
glcA	TRUE	68	109.969	109.969
glcA	TRUE	69	60.6017	60.6017
glcA	TRUE	70	60.6017	60.6017
glcA	TRUE	71	116.568	116.568
glcA	TRUE	72	88.5849	88.5849
glcA	TRUE	73	88.5849	88.5849
glcA	TRUE	74	88.5849	88.5849
glcA	TRUE	75	60.6017	60.6017
glcA	TRUE	76	109.969	109.969
glcA	TRUE	77	109.969	109.969
glcA	TRUE	78	66.5282	60.6017
glcA	TRUE	79	60.6017	60.6017
glcA	TRUE	80	85.2853	85.2853
glcA	TRUE	81	116.568	116.568
glcA	TRUE	82	33.8127	33.8127
glcA	TRUE	84	85.2853	85.2853
glcA	TRUE	85	85.2853	85.2853
glcA	TRUE	86	85.2853	85.2853
glcA	TRUE	88	85.2853	85.2853
glcA	TRUE	89	62.5203	62.5203
glcA	TRUE	90	116.568	116.568
glcA	TRUE	91	62.7318	60.6017
glcA	TRUE	92	65.3404	65.3404
glcA	TRUE	93	60.6017	60.6017
glcA	TRUE	94	33.8127	33.8127
glcA	TRUE	95	85.2853	85.2853
glcA	TRUE	96	60.6017	60.6017
glcA	TRUE	97	60.6017	60.6017
glcA	TRUE	98	88.5849	88.5849
glcA	TRUE	99	85.2853	85.2853
glcA	TRUE	100	59.1981	60.6017
ilvB	FALSE	1	29.1419	12.8034
ilvB	FALSE	2	33.9243	15.1389
ilvB	FALSE	3	29.3439	15.0066
ilvB	FALSE	4	28.1839	17.3031
ilvB	FALSE	5	35.9918	18.3952
ilvB	FALSE	6	29.4907	14.4653
ilvB	FALSE	7	32.5903	17.3031
ilvB	FALSE	8	34.4687	18.9065
ilvB	FALSE	9	29.9215	14.4653
ilvB	FALSE	10	32.0506	18.391
ilvB	FALSE	11	31.4438	18.7354
ilvB	FALSE	12	32.2321	16.221
ilvB	FALSE	13	29.1923	12.7306
ilvB	FALSE	14	28.5826	14.4653
ilvB	FALSE	15	31.5864	15.1389
ilvB	FALSE	16	27.8232	13.249
ilvB	FALSE	17	29.2977	14.4653
ilvB	FALSE	18	30.3711	15.7626
ilvB	FALSE	19	38.5763	20.056
ilvB	FALSE	20	34.1969	15.1389
ilvB	FALSE	21	32.9148	16.8447
ilvB	FALSE	22	34.2243	17.8356
ilvB	FALSE	23	29.3282	17.0406
ilvB	FALSE	24	29.0806	17.3997
ilvB	FALSE	25	30.7297	14.4653
ilvB	FALSE	26	33.4272	19.4178
ilvB	FALSE	27	32.2832	15.1389
ilvB	FALSE	28	33.5858	15.1389
ilvB	FALSE	29	37.1995	19.6115
ilvB	FALSE	30	33.5978	17.3031
ilvB	FALSE	31	31.4716	17.3907
ilvB	FALSE	32	27.628	14.4653
ilvB	FALSE	33	29.7887	18.3605
ilvB	FALSE	34	33.2709	16.221
ilvB	FALSE	35	33.6055	15.0066
ilvB	FALSE	36	29.1076	15.0727
ilvB	FALSE	37	28.8069	15.0727
ilvB	FALSE	38	29.6176	13.489
ilvB	FALSE	39	34.0311	15.0727
ilvB	FALSE	40	29.0295	13.9241
ilvB	FALSE	41	29.669	14.4653
ilvB	FALSE	42	27.3003	13.8516
ilvB	FALSE	43	32.5907	15.1389
ilvB	FALSE	44	31.7174	16.3863
ilvB	FALSE	45	32.1505	17.3031
ilvB	FALSE	46	28.1687	13.9241
ilvB	FALSE	47	33.4772	15.0727
ilvB	FALSE	48	32.431	16.8222
ilvB	FALSE	49	32.3458	15.0727
ilvB	FALSE	50	32.6058	19.0766
ilvB	FALSE	51	31.0859	16.3863
ilvB	FALSE	52	29.0053	18.7354
ilvB	FALSE	53	30.9758	15.9654
ilvB	FALSE	54	35.1389	16.221
ilvB	FALSE	55	35.0704	15.0066
ilvB	FALSE	56	28.3232	13.9241
ilvB	FALSE	57	31.2051	18.0192
ilvB	FALSE	58	29.2071	13.9241
ilvB	FALSE	59	33.1456	15.0727
ilvB	FALSE	60	33.2721	15.1389
ilvB	FALSE	61	33.191	15.1389
ilvB	FALSE	62	35.181	18.7354
ilvB	FALSE	63	31.1678	17.6246
ilvB	FALSE	64	34.1947	16.3863
ilvB	FALSE	65	30.1621	14.4653
ilvB	FALSE	66	28.8579	17.3031
ilvB	FALSE	67	28.5116	15.0066
ilvB	FALSE	68	30.9557	15.0066
ilvB	FALSE	69	29.2883	15.5445
ilvB	FALSE	70	30.0158	15.1389
ilvB	FALSE	71	35.1123	15.0066
ilvB	FALSE	72	34.9113	19.0766
ilvB	FALSE	73	32.7722	15.0727
ilvB	FALSE	74	30.7179	18.9849
ilvB	FALSE	75	28.6114	15.7626
ilvB	FALSE	76	33.3389	14.4653
ilvB	FALSE	77	31.277	13.779
ilvB	FALSE	78	33.6305	16.8447
ilvB	FALSE	79	25.9769	13.9241
ilvB	FALSE	80	29.4384	13.9241
ilvB	FALSE	81	36.3782	15.1389
ilvB	FALSE	82	26.0215	15.0727
ilvB	FALSE	83	30.6517	15.5792
ilvB	FALSE	84	33.34	17.2582
ilvB	FALSE	85	28.1294	12.9882
ilvB	FALSE	86	34.0192	16.3863
ilvB	FALSE	87	34.5846	15.0727
ilvB	FALSE	88	30.6375	14.4653
ilvB	FALSE	89	33.7519	14.4653
ilvB	FALSE	90	32.054	14.4653
ilvB	FALSE	91	33.4855	18.18
ilvB	FALSE	92	35.3861	15.0727
ilvB	FALSE	93	29.015	15.0066
ilvB	FALSE	94	31.1911	15.1389
ilvB	FALSE	95	31.1324	15.5709
ilvB	FALSE	96	31.3627	15.0727
ilvB	FALSE	97	28.8822	15.0727
ilvB	FALSE	98	30.6171	20.056
ilvB	FALSE	99	35.2649	18.7354
ilvB	FALSE	100	33.3986	15.1389
ilvB	TRUE	1	47.7002	47.7002
ilvB	TRUE	3	56.3119	56.3119
ilvB	TRUE	4	50.4856	50.4856
ilvB	TRUE	5	56.3119	56.3119
ilvB	TRUE	6	50.4856	50.4856
ilvB	TRUE	9	56.3119	56.3119
ilvB	TRUE	10	43.2711	43.2711
ilvB	TRUE	12	56.3119	56.3119
ilvB	TRUE	15	30.2879	30.2879
ilvB	TRUE	16	56.3119	56.3119
ilvB	TRUE	17	50.4856	50.4856
ilvB	TRUE	19	56.3119	56.3119
ilvB	TRUE	20	50.4856	50.4856
ilvB	TRUE	21	50.4856	50.4856
ilvB	TRUE	22	56.3119	56.3119
ilvB	TRUE	23	50.4856	50.4856
ilvB	TRUE	26	66.1923	66.1923
ilvB	TRUE	28	50.4856	50.4856
ilvB	TRUE	29	93.1307	93.1307
ilvB	TRUE	31	56.3119	56.3119
ilvB	TRUE	33	50.4856	50.4856
ilvB	TRUE	36	56.3119	56.3119
ilvB	TRUE	37	56.3119	56.3119
ilvB	TRUE	40	56.3119	56.3119
ilvB	TRUE	42	50.4856	50.4856
ilvB	TRUE	43	56.3119	56.3119
ilvB	TRUE	44	11.406	11.406
ilvB	TRUE	46	56.3119	56.3119
ilvB	TRUE	47	69.4708	69.4708
ilvB	TRUE	48	50.4856	50.4856
ilvB	TRUE	49	50.4856	50.4856
ilvB	TRUE	52	46.3302	46.3302
ilvB	TRUE	53	56.3119	56.3119
ilvB	TRUE	54	50.4856	50.4856
ilvB	TRUE	55	84.5016	84.5016
ilvB	TRUE	57	50.4856	50.4856
ilvB	TRUE	59	56.3119	56.3119
ilvB	TRUE	60	50.4856	50.4856
ilvB	TRUE	62	56.3119	56.3119
ilvB	TRUE	64	50.4856	50.4856
ilvB	TRUE	65	56.3119	56.3119
ilvB	TRUE	66	50.4856	50.4856
ilvB	TRUE	67	50.4856	50.4856
ilvB	TRUE	69	56.3119	56.3119
ilvB	TRUE	70	50.4856	50.4856
ilvB	TRUE	71	17.5027	17.5027
ilvB	TRUE	72	56.3119	56.3119
ilvB	TRUE	74	53.287	53.287
ilvB	TRUE	78	50.4856	50.4856
ilvB	TRUE	80	34.4511	34.4511
ilvB	TRUE	81	26.681	26.681
ilvB	TRUE	83	56.3119	56.3119
ilvB	TRUE	85	50.4856	50.4856
ilvB	TRUE	86	56.3119	56.3119
ilvB	TRUE	88	56.3119	56.3119
ilvB	TRUE	89	80.841	80.841
ilvB	TRUE	91	50.4856	50.4856
ilvB	TRUE	92	0.536435	0.536435
ilvB	TRUE	93	56.3119	56.3119
ilvB	TRUE	94	50.4856	50.4856
ilvB	TRUE	95	50.4856	50.4856
lysA	FALSE	1	29.5735	13.779
lysA	FALSE	2	32.8495	15.0727
lysA	FALSE	3	29.153	14.4653
lysA	FALSE	4	28.9273	18.7354
lysA	FALSE	5	36.6531	18.3952
lysA	FALSE	6	29.9024	15.0066
lysA	FALSE	7	30.071	15.1389
lysA	FALSE	8	31.7862	16.767
lysA	FALSE	9	29.1299	13.9241
[truncated: 1,660 more rows]

## Sheet: Linear regression
unique_gene_symbol	replicate	estimate	std.error	statistic	p.value
agrA	1	41.6758	14.6072	2.8531	0.00675615
agrA	2	48.8101	17.7554	2.74904	0.0087042
agrA	3	50.1224	13.3945	3.74202	0.000471575
agrA	4	40.3091	12.6321	3.191	0.0025553
agrA	5	52.1202	17.6528	2.95252	0.00504084
agrA	6	42.1723	14.4775	2.91294	0.00537927
agrA	7	47.2504	16.0502	2.94391	0.00520895
agrA	8	33.307	15.5434	2.14284	0.0376956
agrA	9	35.9599	14.7264	2.44187	0.0186056
agrA	10	38.4968	13.5515	2.84078	0.00685086
agrA	11	29.084	11.8543	2.45346	0.017471
agrA	12	19.037	15.4306	1.23372	0.223712
agrA	13	17.9099	17.5633	1.01973	0.313693
agrA	14	9.68515	16.4392	0.589148	0.558644
agrA	15	21.761	16.5654	1.31364	0.195625
agrA	16	10.3655	13.7842	0.751982	0.455389
agrA	17	54.4835	13.0324	4.1806	0.000119586
agrA	18	25.5044	16.2125	1.57313	0.122542
agrA	19	44.2079	14.9223	2.96253	0.00486047
agrA	20	37.1585	14.1273	2.63027	0.0117133
agrA	21	39.6441	17.9605	2.20729	0.0326799
agrA	22	47.6903	17.0125	2.80325	0.00743881
agrA	23	17.1524	15.8836	1.07988	0.285706
agrA	24	19.4463	13.9939	1.38963	0.171054
agrA	25	44.2509	18.3657	2.40943	0.0219046
agrA	26	17.7597	15.3773	1.15493	0.254217
agrA	27	32.8463	17.7592	1.84953	0.0733543
agrA	28	69.4729	15.6152	4.44907	5.43406e-05
agrA	29	56.9148	16.784	3.39101	0.00148068
agrA	30	42.0681	15.9323	2.64043	0.0113413
agrA	31	56.0924	12.8107	4.37856	6.26567e-05
agrA	32	12.4381	16.095	0.772792	0.443015
agrA	33	24.1802	12.2517	1.97362	0.053855
agrA	34	68.7118	15.9205	4.31593	0.000129792
agrA	35	80.6825	17.4778	4.61629	5.68795e-05
agrA	36	37.0847	13.678	2.71126	0.00959421
agrA	37	20.8469	17.4219	1.19659	0.237
agrA	38	44.619	17.9636	2.48386	0.0175223
agrA	39	49.9924	17.1376	2.91711	0.00576943
agrA	40	10.3821	15.7563	0.658921	0.512854
agrA	41	62.5925	16.1342	3.87949	0.00040308
agrA	42	43.6981	13.4354	3.25246	0.00217235
agrA	43	49.1621	16.8649	2.91506	0.0053895
agrA	44	72.4239	14.5185	4.98839	9.13944e-06
agrA	45	51.3278	13.8407	3.70847	0.000549904
agrA	46	16.8998	20.9466	0.806806	0.42393
agrA	47	51.8815	16.6296	3.11983	0.00335127
agrA	48	43.1413	16.9305	2.54814	0.0146732
agrA	49	17.3437	18.7627	0.924373	0.360223
agrA	50	71.3204	14.6385	4.8721	1.46929e-05
agrA	51	31.1997	13.8233	2.25704	0.0289076
agrA	52	21.1204	17.0055	1.24197	0.221137
agrA	53	31.8667	14.1244	2.25615	0.0279143
agrA	54	49.8268	15.6146	3.19104	0.00247466
agrA	55	69.0774	14.0378	4.92083	1.31137e-05
agrA	56	40.4449	13.8988	2.90995	0.00560135
agrA	57	14.7913	16.058	0.921115	0.362653
agrA	58	45.1802	19.5049	2.31635	0.0258838
agrA	59	48.2603	15.5313	3.1073	0.00334063
agrA	60	38.4759	16.5887	2.3194	0.0250774
agrA	61	12.4141	23.0286	0.539074	0.593249
agrA	62	61.8739	14.4335	4.28683	9.17756e-05
agrA	63	41.3689	15.6511	2.64319	0.0114131
agrA	64	62.9446	14.3723	4.37956	6.42088e-05
agrA	65	41.8465	16.2665	2.57256	0.0136307
agrA	66	30.1529	15.6838	1.92255	0.0610249
agrA	67	25.9878	15.3749	1.69027	0.0974606
agrA	68	43.0156	18.6862	2.302	0.0267607
agrA	69	41.2001	14.4491	2.8514	0.00631075
agrA	70	54.4975	13.2138	4.12429	0.000154097
agrA	71	62.2168	24.2525	2.56537	0.014889
agrA	72	34.6599	15.2525	2.27241	0.0274855
agrA	73	65.868	14.3272	4.5974	3.34737e-05
agrA	74	18.5251	18.362	1.00888	0.318676
agrA	75	43.5188	13.3533	3.25904	0.00228523
agrA	76	57.8358	16.358	3.53563	0.00108927
agrA	77	80.9891	17.5435	4.61648	3.5164e-05
agrA	78	34.9211	16.1598	2.16099	0.0358245
agrA	79	24.7269	16.3753	1.51001	0.138031
agrA	80	41.5681	14.0571	2.95708	0.00493275
agrA	81	78.1707	19.3849	4.03256	0.000319583
agrA	82	14.1027	13.4353	1.04968	0.298914
agrA	83	53.2616	17.9378	2.96924	0.00468814
agrA	84	29.4688	14.3413	2.05483	0.0452475
agrA	85	15.283	15.2642	1.00123	0.321538
agrA	86	59.4265	14.7689	4.02377	0.000222037
agrA	87	61.9623	22.3475	2.77267	0.00874988
agrA	88	16.7143	15.8589	1.05394	0.29708
agrA	89	52.8431	17.9159	2.94951	0.00529598
agrA	90	55.2195	15.8242	3.48955	0.00107802
agrA	91	35.2756	16.0771	2.19414	0.0334294
agrA	92	66.7052	15.7547	4.23398	0.000135197
agrA	93	19.6433	13.5424	1.45051	0.152922
agrA	94	22.2737	14.3014	1.55745	0.126528
agrA	95	33.5728	13.8077	2.43146	0.0191785
agrA	96	27.7837	16.1266	1.72285	0.0919388
agrA	97	32.3931	12.7563	2.53938	0.0145496
agrA	98	8.9077	14.7146	0.605366	0.547674
agrA	99	51.6335	14.5643	3.54522	0.000960996
agrA	100	60.3423	14.8399	4.06622	0.000199826
agrC	1	-21.5537	21.2902	-1.01237	0.317156
agrC	2	5.03243	24.2437	0.207577	0.836539
agrC	3	-3.28003	17.5392	-0.187012	0.852408
agrC	4	3.17087	19.0678	0.166295	0.868654
agrC	5	-2.44705	21.3413	-0.114662	0.909235
agrC	6	8.38134	15.6353	0.536053	0.594347
agrC	7	-25.4986	37.3074	-0.683473	0.497974
agrC	8	-13.5665	19.4158	-0.698737	0.488393
agrC	9	10.6581	16.8873	0.63113	0.531148
agrC	10	-1.21571	20.1252	-0.0604075	0.952111
agrC	11	-9.91469	16.0401	-0.618119	0.539144
agrC	12	2.23572	18.7603	0.119173	0.905669
agrC	13	-22.0347	37.7087	-0.584341	0.562117
agrC	14	-1.53729	18.2366	-0.0842973	0.933186
agrC	15	-3.70658	16.7336	-0.221505	0.82568
agrC	16	-3.2989	14.8074	-0.222787	0.824558
agrC	17	-9.04356	19.3865	-0.466488	0.642934
agrC	18	-8.86117	25.4086	-0.348747	0.728871
agrC	19	-14.179	20.7057	-0.684785	0.496992
agrC	20	-8.19944	16.0352	-0.511339	0.611613
agrC	21	-4.43013	28.8917	-0.153336	0.878851
agrC	22	0.717772	20.3731	0.0352313	0.972051
agrC	23	-1.47171	20.301	-0.0724943	0.942516
agrC	24	-15.2849	19.4047	-0.787689	0.434751
agrC	25	-23.7705	37.8339	-0.628287	0.534275
agrC	26	0.134881	18.6606	0.00722811	0.994265
agrC	27	-5.87558	28.1078	-0.209037	0.835704
agrC	28	0.767555	23.5672	0.0325687	0.974159
agrC	29	-16.011	20.1084	-0.796235	0.430076
agrC	30	-16.9963	28.194	-0.602834	0.549645
agrC	31	1.70485	22.0976	0.077151	0.938818
agrC	32	-21.9828	17.5381	-1.25343	0.215352
agrC	33	-4.42504	17.2156	-0.257037	0.798184
agrC	34	-12.0618	29.8327	-0.404316	0.688513
agrC	35	-12.1084	30.6609	-0.394915	0.695447
agrC	36	4.92487	17.6639	0.27881	0.781727
agrC	37	4.5587	14.7131	0.309839	0.757946
agrC	38	-8.14571	26.6258	-0.305932	0.761326
agrC	39	-17.5416	28.5652	-0.61409	0.542633
agrC	40	-11.676	14.3963	-0.811047	0.420966
agrC	41	-22.575	40.2155	-0.561351	0.577854
agrC	42	11.1161	20.316	0.547158	0.586974
agrC	43	3.75999	23.1068	0.162723	0.87142
agrC	44	-23.2385	22.3059	-1.04181	0.302829
agrC	45	-16.4683	19.8105	-0.831294	0.409924
agrC	46	4.90846	21.0818	0.232829	0.816927
agrC	47	-6.42515	30.4519	-0.210993	0.833964
agrC	48	-11.6793	18.1303	-0.644187	0.523042
agrC	49	-15.7836	16.8467	-0.936894	0.353706
agrC	50	-12.9907	19.9677	-0.650584	0.518698
agrC	51	-25.9277	18.0591	-1.43572	0.157848
agrC	52	-21.3466	19.3093	-1.10551	0.275086
agrC	53	-7.10423	17.0905	-0.415683	0.679203
agrC	54	-12.7866	20.4839	-0.624225	0.535376
agrC	55	-24.4139	18.0667	-1.35133	0.183346
agrC	56	-6.73041	25.0274	-0.268922	0.789219
agrC	57	-0.281284	20.3961	-0.013791	0.989067
agrC	58	-22.0875	39.8595	-0.554134	0.582651
agrC	59	7.21786	20.5	0.35209	0.726491
agrC	60	-3.31318	16.101	-0.205774	0.837895
agrC	61	-6.81612	27.8897	-0.244396	0.808351
agrC	62	-6.63212	18.4599	-0.359271	0.721036
agrC	63	-9.72065	25.691	-0.378367	0.707019
agrC	64	11.4867	18.3431	0.626213	0.534142
agrC	65	-12.6408	19.0635	-0.663087	0.510734
agrC	66	-1.01599	20.5843	-0.0493576	0.960858
agrC	67	4.61813	17.4878	0.264077	0.792851
agrC	68	-16.3168	22.5407	-0.72388	0.473459
agrC	69	-4.9188	18.6664	-0.263512	0.793239
agrC	70	-10.0305	16.4378	-0.610211	0.544725
agrC	71	-8.34326	31.938	-0.261233	0.795489
agrC	72	2.05201	19.2154	0.10679	0.915392
agrC	73	-19.0798	23.4801	-0.812594	0.420637
agrC	74	-0.106939	21.1952	-0.00504543	0.995998
agrC	75	-21.4641	34.3119	-0.625558	0.535158
agrC	76	-19.9129	25.3598	-0.785216	0.437195
agrC	77	-8.43575	19.1984	-0.439399	0.662523
agrC	78	8.21745	23.1363	0.355176	0.724047
agrC	79	-3.95627	23.1967	-0.170553	0.86534
agrC	80	3.95764	20.9636	0.188786	0.851109
agrC	81	-29.2963	45.1001	-0.649583	0.520598
agrC	82	-22.8822	22.3317	-1.02465	0.310459
agrC	83	2.5436	22.3222	0.113949	0.909764
agrC	84	-23.0173	22.866	-1.00662	0.319062
agrC	85	-5.14404	18.4694	-0.278517	0.781764
agrC	86	-2.63318	28.5238	-0.0923151	0.926867
agrC	87	-8.27689	29.6974	-0.278708	0.782064
agrC	88	-3.9022	19.2115	-0.203118	0.839884
agrC	89	-4.93193	24.8457	-0.198502	0.843657
agrC	90	-21.7359	24.1017	-0.901843	0.371838
agrC	91	-6.82815	16.8846	-0.4044	0.687834
agrC	92	-8.19237	31.2043	-0.262539	0.794288
agrC	93	-5.08862	15.9919	-0.3182	0.751608
agrC	94	-0.209599	20.0374	-0.0104604	0.991701
agrC	95	9.43823	16.911	0.558113	0.579596
agrC	96	-14.676	25.3341	-0.579301	0.565341
agrC	97	-15.9593	17.234	-0.926032	0.359262
agrC	98	-21.1787	17.4515	-1.21357	0.230612
agrC	99	-11.6061	21.0113	-0.552373	0.583553
agrC	100	-23.0893	23.534	-0.981105	0.332029
araB	1
araB	2	-5.02182	41.0393	-0.122366	0.903179
araB	3	-12.4778	37.6212	-0.33167	0.741525
araB	4	3.52612	32.3216	0.109095	0.913602
araB	5	33.0796	40.9389	0.808023	0.423424
araB	6	21.3838	23.8279	0.897427	0.37388
araB	7	37.0265	37.082	0.998503	0.323622
araB	8
araB	9	-9.98363	36.2108	-0.275708	0.784034
araB	10	-3.61562	34.0534	-0.106175	0.915937
araB	11	-2.47477	34.6353	-0.0714522	0.943307
araB	12	-26.2799	36.0702	-0.728577	0.470035
araB	13	22.2674	26.8703	0.828701	0.411958
araB	14
araB	15	0.582375	36.0665	0.0161473	0.987188
araB	16	-21.7123	34.4379	-0.630475	0.531093
araB	17	-23.1432	37.5298	-0.616661	0.540313
araB	18	13.3964	25.3654	0.528138	0.599942
araB	19	-21.7927	40.1151	-0.543255	0.589636
araB	20
araB	21	-16.037	40.329	-0.397653	0.692853
araB	22	8.15362	28.1385	0.289767	0.773325
araB	23
araB	24	-10.8853	33.0916	-0.328943	0.74363
araB	25
araB	26	32.4578	35.7579	0.90771	0.368867
araB	27
araB	28	-27.4868	39.736	-0.691735	0.492581
araB	29	10.1552	31.0921	0.326616	0.745507
araB	30
araB	31	37.572	37.117	1.01226	0.316387
araB	32	23.6647	24.6584	0.959702	0.341483
araB	33	37.1096	33.0387	1.12322	0.266606
araB	34
araB	35
araB	36
araB	37
araB	38
araB	39	33.3516	39.741	0.839226	0.406331
araB	40
araB	41
araB	42	-21.2214	34.384	-0.617188	0.540221
araB	43	-0.983661	39.2074	-0.0250887	0.980088
araB	44	-2.32874	38.5452	-0.060416	0.952086
araB	45	-3.20177	38.9416	-0.0822199	0.934821
araB	46	21.025	25.364	0.828932	0.411424
araB	47
araB	48
araB	49	10.2033	26.139	0.390349	0.69812
araB	50	11.5464	27.6671	0.417333	0.678464
araB	51	18.61	25.575	0.727663	0.470589
araB	52	14.4679	23.7924	0.60809	0.546402
araB	53	35.79	36.6245	0.977214	0.332593
araB	54	31.7718	39.6183	0.801949	0.426455
araB	55	6.63091	30.8499	0.214941	0.830829
araB	56
araB	57	-2.72784	34.43	-0.0792286	0.937256
araB	58	-8.70776	39.9918	-0.217739	0.828768
araB	59
araB	60	35.9287	37.1155	0.968025	0.338323
araB	61
araB	62
araB	63	-13.8509	35.915	-0.385658	0.701652
araB	64	15.4421	28.1083	0.549379	0.585292
araB	65	-12.6103	37.2039	-0.338951	0.736297
araB	66	-8.80781	34.8274	-0.252899	0.801524
araB	67
araB	68
araB	69	-11.6183	36.2059	-0.320895	0.749627
araB	70	-1.45862	38.2154	-0.0381685	0.969718
araB	71	-14.3088	44.4942	-0.321588	0.749734
araB	72	34.1323	36.944	0.923893	0.36007
araB	73	36.7883	39.7099	0.926426	0.35906
araB	74	13.638	25.5706	0.533347	0.596539
araB	75	3.57486	34.4747	0.103695	0.917929
araB	76
araB	77
araB	78	-5.06383	39.2751	-0.128932	0.897961
araB	79	-7.72821	32.4365	-0.238256	0.812764
araB	80	37.7399	35.0776	1.0759	0.287708
araB	81
araB	82	-19.3703	31.4783	-0.615355	0.541111
araB	83	38.4023	37.4377	1.02577	0.310252
araB	84	-12.8808	39.1608	-0.328921	0.743617
araB	85
araB	86	35.0522	39.5404	0.886492	0.380172
araB	87
araB	88
araB	89
araB	90
araB	91	-16.5752	39.0391	-0.42458	0.673166
araB	92	10.7407	31.1845	0.344425	0.732377
araB	93
araB	94	6.58458	24.2399	0.271642	0.787168
araB	95
araB	96
araB	97	8.26844	24.0271	0.34413	0.732317
araB	98
araB	99
araB	100	-26.9743	40.0575	-0.673391	0.504302
ausA	1	0.842907	15.9911	0.0527109	0.958218
ausA	2	47.5638	19.9853	2.37994	0.0218205
ausA	3	31.1874	15.5774	2.00209	0.050714
ausA	4	11.2321	15.023	0.747662	0.458469
ausA	5	20.0321	17.6009	1.13813	0.261225
ausA	6	-5.27455	12.8	-0.412076	0.682081
ausA	7	6.77193	16.2324	0.417186	0.678618
ausA	8	-4.77146	15.2984	-0.311893	0.756595
ausA	9	-2.7469	13.9097	-0.19748	0.844341
ausA	10	10.3373	17.5704	0.588338	0.559383
ausA	11	-2.50707	12.5046	-0.200491	0.841864
ausA	12	13.5241	14.5672	0.928396	0.358156
ausA	13	18.6612	17.5446	1.06364	0.293567
ausA	14	11.052	15.1543	0.729296	0.469518
ausA	15	11.4074	18.5741	0.614158	0.542204
ausA	16	2.81418	13.8522	0.203159	0.839789
ausA	17	22.721	14.8287	1.53223	0.131897
ausA	18	-1.36262	14.4034	-0.0946042	0.92504
ausA	19	19.1268	17.1684	1.11407	0.271165
ausA	20	-5.90624	16.1841	-0.364941	0.716904
ausA	21	22.4932	15.195	1.4803	0.146083
ausA	22	25.6354	16.6015	1.54416	0.129554
ausA	23	5.09386	14.8295	0.343494	0.732759
ausA	24	3.67864	12.6402	0.291028	0.772284
ausA	25	10.6604	16.7656	0.635852	0.529395
ausA	26	0.0241169	15.6035	0.00154561	0.998774
ausA	27	2.78376	18.6507	0.149258	0.882259
ausA	28	33.7542	17.9997	1.87527	0.0671119
ausA	29	15.1077	18.7119	0.807384	0.423789
ausA	30	21.5685	15.7235	1.37173	0.176948
ausA	31	24.7842	15.7456	1.57404	0.121914
ausA	32	4.97645	12.5472	0.396618	0.693212
ausA	33	5.09103	12.691	0.401153	0.689983
ausA	34	49.4879	20.0761	2.46502	0.0189084
ausA	35	49.2875	20.7152	2.37929	0.0232841
ausA	36	4.48039	14.7853	0.303031	0.763328
ausA	37	5.81183	13.0088	0.446761	0.656939
ausA	38	2.28637	16.2673	0.14055	0.888968
ausA	39	25.747	15.8865	1.62069	0.112942
ausA	40	3.98547	12.8979	0.309	0.758556
ausA	41	32.7013	16.8407	1.9418	0.0596025
ausA	42	22.0352	13.6045	1.6197	0.112285
ausA	43	23.2099	15.4604	1.50125	0.139842
ausA	44	34.6089	15.8456	2.18413	0.0340884
ausA	45	20.9396	14.5816	1.43603	0.157617
ausA	46	0.253212	14.4673	0.0175023	0.986112
ausA	47	38.5345	17.5132	2.20031	0.0336216
ausA	48	38.6409	17.1935	2.24741	0.0300579
ausA	49	-1.9258	15.8345	-0.12162	0.903741
ausA	50	30.2777	16.1538	1.87433	0.0675336
ausA	51	9.77878	15.4916	0.631232	0.531082
ausA	52	-0.324215	13.6091	-0.0238235	0.981106
ausA	53	19.2861	13.6877	1.40901	0.164264
ausA	54	29.733	18.1013	1.64259	0.10687
ausA	55	30.2696	19.7071	1.53597	0.131871
ausA	56	-1.24761	14.1994	-0.087864	0.930375
ausA	57	11.4051	17.8073	0.640473	0.525611
ausA	58	28.8706	16.8415	1.71426	0.0944199
ausA	59	47.8534	19.1888	2.49382	0.0165622
ausA	60	-4.65474	15.2123	-0.305985	0.761059
ausA	61	9.03933	15.8353	0.570835	0.571658
ausA	62	17.8127	15.7829	1.12861	0.264914
ausA	63	-1.00262	15.6	-0.0642709	0.949052
ausA	64	22.3455	15.5938	1.43298	0.158346
ausA	65	5.84613	17.4507	0.335008	0.739248
ausA	66	8.35854	16.2806	0.513407	0.610235
ausA	67	1.58405	12.3558	0.128203	0.898524
ausA	68	-1.97961	16.7159	-0.118427	0.906338
ausA	69	28.7007	14.0071	2.04901	0.0457269
ausA	70	25.7156	16.0627	1.60095	0.116234
ausA	71	32.8414	20.4126	1.60888	0.116891
ausA	72	-6.75921	14.1741	-0.476871	0.635574
ausA	73	20.3574	15.0637	1.35142	0.183171
ausA	74	4.74609	16.8076	0.282378	0.779009
ausA	75	14.7623	17.7545	0.831467	0.410646
ausA	76	48.8014	21.0026	2.32359	0.0255957
ausA	77	26.0261	16.3722	1.58965	0.11924
ausA	78	23.6505	15.4929	1.52654	0.133578
ausA	79	6.2808	14.004	0.448502	0.655943
ausA	80	7.03661	16.5939	0.424048	0.673551
ausA	81	46.6562	22.3317	2.08923	0.0447238
ausA	82	4.72227	12.0086	0.393241	0.695814
ausA	83	28.08	14.7369	1.90542	0.0628531
ausA	84	23.4309	16.5353	1.41702	0.162804
ausA	85	0.769584	15.4161	0.0499208	0.960384
ausA	86	46.8284	19.4015	2.41364	0.0200238
ausA	87	24.5903	16.627	1.47893	0.147856
ausA	88	3.16219	17.3705	0.182044	0.856299
ausA	89	31.9874	19.1105	1.67382	0.10197
ausA	90	19.2267	15.5358	1.23757	0.222154
ausA	91	19.4211	15.5885	1.24586	0.219264
ausA	92	27.4392	18.5202	1.48158	0.146486
ausA	93	0.135592	13.0611	0.0103813	0.991757
ausA	94	6.11419	14.6613	0.417028	0.678686
ausA	95	6.45175	15.6544	0.412138	0.68224
ausA	96	-1.47983	14.4365	-0.102506	0.918821
ausA	97	5.93959	15.7131	0.378003	0.707167
ausA	98	1.06703	14.7676	0.0722545	0.942688
ausA	99	32.7781	18.428	1.77871	0.0823571
ausA	100	29.9305	16.8543	1.77583	0.0828374
cydA	1	18.5582	36.6515	0.506342	0.615328
cydA	2
cydA	3	-28.1556	37.4515	-0.75179	0.455702
cydA	4	-3.02973	32.3227	-0.0937338	0.925728
cydA	5	-34.9449	40.9037	-0.85432	0.397555
cydA	6	3.34899	24.0182	0.139436	0.889677
cydA	7
cydA	8	-14.4831	37.6592	-0.384583	0.702399
cydA	9	-28.2653	25.5648	-1.10563	0.274762
cydA	10	3.58709	34.0535	0.105337	0.916598
cydA	11	-29.7361	34.3953	-0.864542	0.391187
cydA	12	-0.226436	36.2823	-0.00624095	0.995048
cydA	13
cydA	14	-26.8946	35.0692	-0.7669	0.447059
cydA	15	-21.9071	35.9184	-0.609912	0.544988
cydA	16
cydA	17	-28.0141	37.462	-0.7478	0.458155
cydA	18
cydA	19
cydA	20
cydA	21	-12.4911	28.8367	-0.433167	0.667059
cydA	22
cydA	23	-4.16305	34.4186	-0.120953	0.904244
cydA	24	-8.0327	23.64	-0.339792	0.735495
cydA	25
cydA	26	42.1481	35.5325	1.18618	0.241776
cydA	27	-9.4667	39.1528	-0.241788	0.81044
cydA	28	-6.13547	39.9319	-0.153648	0.878559
cydA	29	98.2811	40.9333	2.40101	0.0206433
cydA	30	-32.031	39.3065	-0.814903	0.41942
cydA	31	-31.6836	37.229	-0.851048	0.398883
cydA	32	-6.49058	24.8521	-0.261168	0.794956
cydA	33	-11.9517	23.8211	-0.501728	0.618018
cydA	34	8.90505	41.6546	0.213783	0.831993
cydA	35
cydA	36	63.6236	32.725	1.94419	0.0584333
cydA	37	-14.3291	24.4047	-0.587145	0.559697
cydA	38
cydA	39
cydA	40	-14.5357	24.2005	-0.600635	0.550692
cydA	41
cydA	42
cydA	43	24.794	39.044	0.635027	0.528426
cydA	44	-20.3114	38.4302	-0.528527	0.599675
cydA	45	-27.1473	27.5461	-0.985524	0.329413
cydA	46	34.4857	35.3871	0.97453	0.334891
cydA	47	54.5639	41.6772	1.3092	0.197937
cydA	48
cydA	49
cydA	50	-10.2805	38.7354	-0.265403	0.791938
cydA	51
cydA	52	17.3249	33.2929	0.520379	0.605532
cydA	53	-19.2097	26.2184	-0.732679	0.466756
cydA	54	-2.41443	28.4818	-0.0847709	0.932789
cydA	55	83.0968	41.2503	2.01445	0.0502438
cydA	56	13.9012	34.974	0.397472	0.692899
cydA	57
cydA	58	-27.6328	39.7707	-0.694802	0.491298
cydA	59	24.6565	39.4559	0.624912	0.535331
cydA	60	-32.0958	37.1952	-0.8629	0.392872
cydA	61
cydA	62	-2.60997	28.2568	-0.0923659	0.926808
cydA	63	32.5956	35.632	0.914783	0.365407
cydA	64	-32.9308	39.1796	-0.840507	0.404791
cydA	65
cydA	66	42.3606	34.2627	1.23635	0.222888
cydA	67	-13.9725	24.1442	-0.57871	0.565491
cydA	68	-29.425	38.017	-0.773998	0.443599
cydA	69	-11.5746	25.831	-0.448089	0.656025
cydA	70
cydA	71	-17.6095	44.4594	-0.396081	0.69452
cydA	72	-33.7443	36.9513	-0.913209	0.365604
cydA	73	-32.5541	39.7902	-0.818143	0.417493
cydA	74	24.9212	35.6652	0.698755	0.488467
cydA	75	-12.3771	34.4238	-0.359551	0.721074
cydA	76	30.4617	42.8451	0.710972	0.481443
cydA	77	-16.4716	29.5212	-0.55796	0.579765
cydA	78	-15.9469	27.974	-0.57006	0.571352
cydA	79	-18.199	32.3434	-0.56268	0.576445
cydA	80	-17.4323	35.4308	-0.492011	0.625103
cydA	81	-9.69715	45.3641	-0.213763	0.832088
cydA	82	-20.7067	22.3741	-0.925478	0.359163
cydA	83	-13.0286	26.9835	-0.482836	0.631454
cydA	84	-0.22895	28.0028	-0.00817597	0.99351
cydA	85	64.605	34.6804	1.86287	0.0683602
cydA	86
cydA	87	-16.7897	29.5974	-0.567271	0.574051
cydA	88	61.9967	36.2004	1.7126	0.093109
cydA	89	77.0364	40.1865	1.91697	0.0624043
cydA	90	-13.957	29.3808	-0.47504	0.637007
cydA	91
cydA	92	-34.8497	43.2545	-0.805689	0.425308
cydA	93	-17.3151	24.4515	-0.70814	0.48202
cydA	94
cydA	95	-16.3373	36.1381	-0.452081	0.653431
cydA	96	1.83722	25.429	0.072249	0.942731
cydA	97
cydA	98	-2.73954	34.3538	-0.079745	0.936758
cydA	99	-15.3997	40.6405	-0.378924	0.706609
cydA	100	-33.241	39.9478	-0.832111	0.409944
ebpS	1
ebpS	2
ebpS	3	-28.1556	37.4515	-0.75179	0.455702
ebpS	4
ebpS	5	-34.9449	40.9037	-0.85432	0.397555
ebpS	6	-28.2071	33.3898	-0.844782	0.402339
ebpS	7
ebpS	8
ebpS	9	-28.8484	35.9853	-0.801672	0.426956
ebpS	10
ebpS	11	-29.7361	34.3953	-0.864542	0.391187
ebpS	12	-0.226436	36.2823	-0.00624095	0.995048
ebpS	13
ebpS	14	-26.8946	35.0692	-0.7669	0.447059
ebpS	15
ebpS	16
ebpS	17	-28.0141	37.462	-0.7478	0.458155
ebpS	18
ebpS	19
ebpS	20
ebpS	21	-31.7627	40.1117	-0.791858	0.432791
ebpS	22
ebpS	23
ebpS	24	-27.3799	32.8924	-0.83241	0.4093
ebpS	25
ebpS	26
ebpS	27
ebpS	28	-6.13547	39.9319	-0.153648	0.878559
ebpS	29
ebpS	30	-32.031	39.3065	-0.814903	0.41942
ebpS	31	2.39673	26.7858	0.0894779	0.929067
ebpS	32	-25.8411	34.6693	-0.745361	0.459286
ebpS	33	-28.468	33.2064	-0.857306	0.395287
ebpS	34
ebpS	35
ebpS	36	63.6236	32.725	1.94419	0.0584333
ebpS	37	2.22052	24.4851	0.0906886	0.928095
ebpS	38
ebpS	39
ebpS	40	-27.8012	33.7985	-0.822559	0.414515
ebpS	41
ebpS	42
ebpS	43	24.794	39.044	0.635027	0.528426
ebpS	44
ebpS	45	-30.5251	38.689	-0.788986	0.434082
ebpS	46
ebpS	47
ebpS	48
ebpS	49
ebpS	50	-10.2805	38.7354	-0.265403	0.791938
ebpS	51
ebpS	52
ebpS	53	-29.6596	36.7205	-0.807712	0.422614
ebpS	54	-33.8553	39.5831	-0.855297	0.39655
ebpS	55
ebpS	56
ebpS	57
ebpS	58	-27.6328	39.7707	-0.694802	0.491298
ebpS	59
ebpS	60	-32.0958	37.1952	-0.8629	0.392872
ebpS	61
ebpS	62	-2.04167	28.2579	-0.0722512	0.942715
ebpS	63	32.5956	35.632	0.914783	0.365407
ebpS	64	-32.9308	39.1796	-0.840507	0.404791
ebpS	65
ebpS	66
ebpS	67	-27.2477	33.6838	-0.808926	0.422549
ebpS	68	-24.6074	27.1484	-0.906404	0.370288
ebpS	69	-28.1	36.0247	-0.780022	0.439055
ebpS	70
ebpS	71
ebpS	72	-33.7443	36.9513	-0.913209	0.365604
ebpS	73
ebpS	74
ebpS	75
ebpS	76	30.4617	42.8451	0.710972	0.481443
ebpS	77	-29.6884	41.1731	-0.721064	0.474773
ebpS	78	-32.3871	38.997	-0.830505	0.410453
ebpS	79	-18.199	32.3434	-0.56268	0.576445
ebpS	80
ebpS	81
ebpS	82	-24.2393	31.4107	-0.771689	0.443931
ebpS	83	-29.5297	37.6086	-0.785186	0.436285
ebpS	84	-31.7135	38.9413	-0.814391	0.419361
ebpS	85	64.605	34.6804	1.86287	0.0683602
ebpS	86
ebpS	87	-33.2102	41.1006	-0.808023	0.424385
ebpS	88	61.9967	36.2004	1.7126	0.093109
ebpS	89
ebpS	90	-30.4399	40.9618	-0.743128	0.461183
ebpS	91
ebpS	92
ebpS	93	-27.7867	34.2002	-0.812474	0.420224
ebpS	94
ebpS	95
ebpS	96	-29.7613	35.2781	-0.84362	0.403445
ebpS	97
ebpS	98	-2.73954	34.3538	-0.079745	0.936758
ebpS	99	-15.3997	40.6405	-0.378924	0.706609
ebpS	100
fmtB	1	30.9261	25.8655	1.19565	0.238702
fmtB	2	26.4425	29.0815	0.909254	0.368284
fmtB	3	32.8493	18.8467	1.74297	0.0874857
fmtB	4	32.6096	18.4576	1.76673	0.0839077
fmtB	5	26.4538	24.0296	1.10088	0.276933
fmtB	6	16.3159	17.1871	0.949308	0.347123
fmtB	7	8.49976	19.3855	0.43846	0.663248
fmtB	8	30.442	26.5819	1.14521	0.258312
fmtB	9	57.3406	24.4591	2.34435	0.023534
fmtB	10	28.7332	17.0881	1.68147	0.0999215
fmtB	11	84.5487	32.6319	2.59098	0.0123349
fmtB	12	29.9931	18.2228	1.64591	0.10675
fmtB	13	31.2913	26.6553	1.17392	0.24704
fmtB	14	31.8038	24.7858	1.28315	0.205868
fmtB	15	53.2032	24.5347	2.16849	0.0354466
fmtB	16	30.204	17.2938	1.74652	0.0865137
fmtB	17	28.1452	21.8332	1.2891	0.203415
fmtB	18	85.8732	33.2679	2.58126	0.0130973
fmtB	19	34.1156	23.2078	1.47	0.148519
fmtB	20	26.39	21.7474	1.21348	0.23142
fmtB	21	51.452	27.814	1.84986	0.0712142
fmtB	22	28.2725	22.8712	1.23616	0.222813
fmtB	23	28.1673	19.8821	1.41672	0.16316
fmtB	24	46.0227	22.7171	2.0259	0.0483526
fmtB	25	34.911	26.6286	1.31103	0.199177
fmtB	26	23.5296	18.328	1.28381	0.205781
fmtB	27	84.5889	36.3157	2.32926	0.0261138
fmtB	28	23.7492	23.3059	1.01902	0.313524
fmtB	29	3.33429	22.5245	0.14803	0.882996
fmtB	30	31.3222	27.9198	1.12186	0.267872
fmtB	31	27.2656	21.7529	1.25342	0.216
fmtB	32	88.4059	32.7046	2.70316	0.00916327
fmtB	33	30.7832	19.2142	1.60211	0.115309
fmtB	34	27.3074	29.5354	0.924567	0.361707
fmtB	35	31.7987	30.2306	1.05187	0.300501
fmtB	36	30.4635	19.6282	1.55203	0.127985
fmtB	37	30.5481	19.7343	1.54797	0.127813
fmtB	38	16.3205	21.8994	0.745248	0.460707
fmtB	39	26.2817	28.3971	0.925504	0.360254
fmtB	40	30.293	19.5758	1.54747	0.127815
fmtB	41	30.0189	28.5148	1.05275	0.299105
fmtB	42	37.0036	19.6229	1.88573	0.0657963
fmtB	43	14.4891	20.1246	0.719969	0.475035
fmtB	44	35.4189	27.0518	1.3093	0.196936
fmtB	45	18.85	22.803	0.826644	0.412616
fmtB	46	31.3491	20.5816	1.52316	0.134565
fmtB	47	22.0001	24.9534	0.881648	0.383235
fmtB	48	27.1003	22.5346	1.2026	0.236029
fmtB	49	24.2216	18.5926	1.30276	0.199286
fmtB	50	10.5355	22.8412	0.461249	0.646892
fmtB	51	32.0226	25.2782	1.26681	0.211742
fmtB	52	11.4542	19.669	0.582346	0.563447
fmtB	53	13.7224	18.8746	0.72703	0.470183
fmtB	54	25.2665	23.2191	1.08817	0.281841
fmtB	55	23.5207	25.2471	0.931618	0.356736
fmtB	56	4.36135	18.1068	0.240868	0.810751
fmtB	57	29.7192	19.8332	1.49845	0.142067
fmtB	58	31.3851	28.212	1.11247	0.272745
fmtB	59	26.2333	23.0774	1.13675	0.261938
fmtB	60	51.0434	25.6948	1.98653	0.0532248
fmtB	61	27.3485	27.528	0.993478	0.327296
fmtB	62	26.0066	23.0114	1.13016	0.264267
fmtB	63	16.78	21.1056	0.795047	0.430953
fmtB	64	49.9479	27.2593	1.83233	0.0731104
fmtB	65	29.3589	21.5544	1.36208	0.180266
fmtB	66	17.0491	17.8539	0.954919	0.344836
fmtB	67	26.3634	17.0818	1.54337	0.12931
fmtB	68	34.3049	26.8772	1.27636	0.209379
fmtB	69	30.0717	20.9199	1.43747	0.156813
fmtB	70	54.2903	26.1157	2.07884	0.0432366
fmtB	71	25.8757	31.6605	0.817285	0.419456
fmtB	72	14.3596	17.2531	0.83229	0.409284
fmtB	73	27.4321	28.3593	0.967305	0.33845
fmtB	74	53.1099	24.3431	2.18172	0.0346428
fmtB	75	87.9376	31.5515	2.78711	0.00809571
fmtB	76	27.0762	30.5817	0.885371	0.381525
fmtB	77	29.0765	29.2942	0.992571	0.326472
fmtB	78	25.5843	22.8647	1.11894	0.268851
fmtB	79	37.3588	22.5259	1.65848	0.104176
fmtB	80	37.0932	20.2298	1.8336	0.073333
fmtB	81	29.2126	32.1862	0.907611	0.370868
fmtB	82	90.1678	28.9099	3.11893	0.00300978
fmtB	83	56.5149	25.7637	2.19359	0.0332462
fmtB	84	82.7376	37.3798	2.21343	0.031555
fmtB	85	17.4511	16.524	1.05611	0.295997
fmtB	86	38.9266	22.8186	1.70591	0.095075
fmtB	87	30.6138	29.2883	1.04526	0.302872
fmtB	88	31.8975	21.4825	1.48482	0.143998
fmtB	89	26.5824	21.4002	1.24216	0.221411
fmtB	90	84.1545	39.2945	2.14163	0.0375521
fmtB	91	12.1231	20.1485	0.601686	0.550402
fmtB	92	25.7828	30.9578	0.832838	0.410008
fmtB	93	43.8048	19.324	2.26686	0.027585
fmtB	94	29.5356	19.5364	1.51183	0.137728
fmtB	95	15.9946	18.5909	0.860348	0.394261
fmtB	96	24.3365	20.681	1.17675	0.245622
fmtB	97	22.3617	19.5848	1.14179	0.25945
fmtB	98	15.7639	20.113	0.783765	0.436875
fmtB	99	29.6396	28.765	1.03041	0.308581
fmtB	100	43.3359	28.0346	1.5458	0.129482
fnbA	1
fnbA	2
fnbA	3	-30.0602	37.4219	-0.80328	0.425615
fnbA	4	15.4873	32.245	0.480301	0.63329
fnbA	5	-25.1526	41.0669	-0.61248	0.543373
fnbA	6	34.7711	33.2632	1.04533	0.300999
fnbA	7
fnbA	8	-23.1442	37.5607	-0.61618	0.540951
fnbA	9	-23.2627	25.6766	-0.905989	0.369767
fnbA	10	3.58709	34.0535	0.105337	0.916598
fnbA	11	-31.6387	34.3632	-0.920715	0.361371
fnbA	12	-0.226436	36.2823	-0.00624095	0.995048
fnbA	13	32.3364	37.5314	0.861583	0.39381
fnbA	14	-28.8023	35.0362	-0.822071	0.415277
fnbA	15
fnbA	16	-26.3723	24.4045	-1.08063	0.284754
fnbA	17	-17.0171	22.0668	-0.771164	0.444312
fnbA	18	-6.1413	35.5843	-0.172585	0.863735
fnbA	19	54.6696	27.8561	1.96257	0.0557605
fnbA	20	-29.7218	37.1629	-0.79977	0.428141
fnbA	21
fnbA	22	-7.01731	39.3818	-0.178187	0.859376
fnbA	23
fnbA	24	-23.934	23.415	-1.02217	0.311827
fnbA	25	-26.0196	37.7876	-0.688577	0.496052
fnbA	26
fnbA	27	-19.0931	27.9294	-0.683619	0.498988
fnbA	28
fnbA	29
fnbA	30	-3.14863	39.5927	-0.0795255	0.936967
fnbA	31	-20.5336	37.3882	-0.5492	0.585362
fnbA	32	-25.615	24.6223	-1.04032	0.302828
fnbA	33	-30.372	33.1733	-0.915554	0.36421
fnbA	34
fnbA	35	-20.028	42.6773	-0.469289	0.641949
fnbA	36	63.6236	32.725	1.94419	0.0584333
fnbA	37	-24.3091	34.126	-0.712334	0.479504
fnbA	38
fnbA	39
fnbA	40	-29.7045	33.7673	-0.879681	0.383079
fnbA	41	-12.4148	28.8574	-0.430212	0.669472
fnbA	42	63.2252	33.218	1.90334	0.0634041
fnbA	43
fnbA	44
fnbA	45	-22.6384	38.8041	-0.583403	0.562411
fnbA	46
fnbA	47
fnbA	48
fnbA	49	11.9468	26.1225	0.457336	0.64963
fnbA	50	-27.7334	38.5403	-0.719594	0.47558
fnbA	51	-31.3731	35.6779	-0.879344	0.383886
fnbA	52	-17.98	33.2846	-0.54019	0.591919
fnbA	53	-26.189	26.1122	-1.00294	0.320128
fnbA	54	-3.38655	28.4798	-0.118911	0.905832
fnbA	55
fnbA	56	-16.854	34.9452	-0.4823	0.631931
fnbA	57
fnbA	58	-0.332314	40.0161	-0.00830451	0.993416
fnbA	59
fnbA	60
fnbA	61	-21.9568	38.7461	-0.566683	0.574546
fnbA	62	28.9741	39.306	0.737142	0.464779
fnbA	63	-19.7796	35.8504	-0.551726	0.583992
fnbA	64
fnbA	65	2.16813	26.6448	0.0813717	0.935524
fnbA	66
fnbA	67
fnbA	68	19.124	27.2614	0.701506	0.487153
fnbA	69	-24.6521	25.6469	-0.96121	0.341072
fnbA	70	-30.7015	37.9469	-0.809065	0.422643
fnbA	71	-29.9805	44.2642	-0.677308	0.502794
fnbA	72
fnbA	73	-21.3901	39.9544	-0.535363	0.594978
fnbA	74
fnbA	75
fnbA	76	-33.8036	42.779	-0.790192	0.43432
fnbA	77
fnbA	78
fnbA	79
fnbA	80	-18.2115	35.4221	-0.514128	0.609678
fnbA	81
fnbA	82	-21.6781	22.3557	-0.96969	0.336869
fnbA	83
fnbA	84	-1.20107	28.0023	-0.0428917	0.965962
fnbA	85	4.28017	21.1156	0.202702	0.840191
fnbA	86	13.2469	39.8419	0.332486	0.741101
fnbA	87
fnbA	88	15.6229	26.5263	0.588959	0.558594
fnbA	89
fnbA	90	-27.0783	29.1809	-0.927946	0.358279
fnbA	91
fnbA	92
fnbA	93	-27.6154	24.2688	-1.1379	0.260378
fnbA	94	-26.716	33.6859	-0.793092	0.43198
fnbA	95
fnbA	96	3.52408	25.4249	0.138607	0.890393
fnbA	97	-29.1083	33.3845	-0.87191	0.387785
fnbA	98	-28.7968	24.1947	-1.19021	0.239585
fnbA	99
fnbA	100	-22.0611	40.1273	-0.549779	0.585316
glcA	1	58.4294	24.6796	2.36752	0.0227081
glcA	2	34.9328	23.6636	1.47622	0.14717
glcA	3	9.62069	26.862	0.358152	0.721737
glcA	4	32.633	31.9657	1.02088	0.312651
glcA	5	54.5219	28.3232	1.92499	0.0607101
glcA	6	31.3133	33.3333	0.939401	0.352133
glcA	7	85.8864	35.1485	2.44353	0.0187235
glcA	8	53.1264	25.7588	2.06246	0.0450984
glcA	9	37.8965	20.6349	1.83652	0.0728913
glcA	10	28.6899	33.7757	0.849426	0.400349
glcA	11	59.2974	23.3417	2.54041	0.014038
glcA	12	58.3222	24.4385	2.38649	0.0212758
glcA	13	47.292	26.0877	1.81281	0.0770128
glcA	14	83.118	33.0966	2.51137	0.0156011
glcA	15	38.4824	20.5037	1.87686	0.0670307
glcA	16	59.0929	23.2985	2.53635	0.0141836
glcA	17	4.2669	26.9039	0.158598	0.874638
glcA	18	60.7448	23.8136	2.55085	0.0141381
glcA	19	25.3993	23.4549	1.0829	0.284621
glcA	20	56.49	25.3767	2.22606	0.0311797
glcA	21	35.3628	28.392	1.24552	0.219684
glcA	22	30.2299	22.8155	1.32497	0.191869
glcA	23	61.3281	22.9148	2.67636	0.0102142
glcA	24
glcA	25
glcA	26	56.153	24.4012	2.30124	0.0260637
glcA	27	79.9706	36.6314	2.18311	0.0362444
glcA	28	57.023	27.2826	2.09008	0.0421663
glcA	29	47.7292	30.2868	1.57591	0.12221
glcA	30	53.9847	27.1396	1.98915	0.0527842
glcA	31	29.2158	37.2702	0.783894	0.436875
glcA	32	42.1894	19.6746	2.14436	0.036522
glcA	33	57.2671	22.4931	2.54598	0.0139611
glcA	34
glcA	35
glcA	36	31.5916	33.7913	0.934902	0.35506
glcA	37	58.154	23.0934	2.51821	0.014976
glcA	38
glcA	39	27.2187	39.8576	0.682897	0.498608
glcA	40	61.3213	22.7467	2.69583	0.00943738
glcA	41
glcA	42	33.5213	34.1657	0.981139	0.33177
glcA	43	54.396	26.8884	2.02303	0.0486594
glcA	44	37.5829	22.0588	1.70376	0.0951731
glcA	45	58.8359	26.4729	2.22249	0.0310987
glcA	46	45.087	24.6728	1.82739	0.0741319
glcA	47	83.3618	40.4684	2.05992	0.0459537
glcA	48	28.4116	38.5016	0.737932	0.464759
glcA	49	54.8893	24.8718	2.20689	0.0324657
glcA	50	28.618	38.5256	0.74283	0.461532
glcA	51	60.0545	24.117	2.49013	0.0165299
glcA	52	31.9283	33.0347	0.966508	0.339323
glcA	53	55.7706	25.2846	2.20572	0.0314512
glcA	54	23.0832	28.2924	0.815883	0.418516
glcA	55	29.9217	25.0891	1.19262	0.239558
glcA	56	62.9401	23.2238	2.71015	0.00948339
glcA	57
glcA	58
glcA	59	27.5536	39.4113	0.699129	0.488236
glcA	60	53.9862	25.5577	2.11232	0.04037
glcA	61	78.9106	36.5668	2.15799	0.0378724
glcA	62	51.8234	27.2069	1.90479	0.0630709
glcA	63	33.8186	20.6252	1.63967	0.10837
glcA	64	56.3171	26.9994	2.08587	0.0423298
glcA	65	36.9119	21.2827	1.73436	0.0900183
glcA	66	82.4328	32.5619	2.53157	0.0150024
glcA	67	32.2966	33.5907	0.961475	0.341132
glcA	68	80.9886	36.0459	2.24682	0.0303858
glcA	69	31.3975	35.9702	0.872877	0.386903
glcA	70	30.8011	37.9452	0.811727	0.421129
glcA	71	84.2863	42.1523	1.99957	0.0535887
glcA	72	55.4276	25.4124	2.18112	0.0340028
glcA	73	58.2394	27.329	2.13105	0.0384617
glcA	74	59.5087	23.9964	2.4799	0.0171366
glcA	75	32.7705	34.0878	0.961357	0.342149
glcA	76	78.5949	41.2015	1.90758	0.0640249
glcA	77	80.4804	39.5612	2.03433	0.0481159
glcA	78	34.6768	22.6084	1.5338	0.131783
glcA	79	35.3775	32.0257	1.10466	0.275178
glcA	80	58.1062	23.8755	2.43372	0.0189786
glcA	81	82.9138	42.9652	1.92979	0.0625382
glcA	82	8.10284	22.5358	0.359554	0.720695
glcA	83
glcA	84	54.0655	26.9166	2.00863	0.0501039
glcA	85	58.995	24.2148	2.43632	0.0184418
glcA	86	53.0897	27.3808	1.93894	0.0589388
glcA	87
glcA	88	56.3544	25.3735	2.22099	0.0310049
glcA	89	27.173	41.7715	0.650515	0.519079
glcA	90	86.3123	39.1926	2.20226	0.0326984
glcA	91	30.8539	22.6292	1.36345	0.179522
glcA	92	32.384	30.7984	1.05148	0.299509
glcA	93	31.6676	34.1352	0.92771	0.357844
glcA	94	2.30223	24.2577	0.094907	0.92482
glcA	95	56.1746	24.4787	2.29484	0.0265699
glcA	96	29.8888	35.2757	0.847291	0.401418
glcA	97	32.3943	33.3187	0.972257	0.336008
glcA	98	60.2865	23.0061	2.62046	0.0115993
glcA	99	52.3469	28.0023	1.86938	0.0683897
glcA	100	27.6423	23.4196	1.18031	0.244365
ilvB	1	18.5582	36.6515	0.506342	0.615328
ilvB	2
ilvB	3	26.968	37.469	0.719742	0.475035
ilvB	4	22.3017	32.1581	0.693504	0.491481
ilvB	5	20.3201	41.1276	0.494074	0.623712
ilvB	6	20.9949	33.4981	0.62675	0.533733
ilvB	7
ilvB	8
ilvB	9	26.3904	36.0272	0.732512	0.467654
ilvB	10	11.2205	24.3008	0.461735	0.646599
ilvB	11
ilvB	12	24.0797	36.1043	0.66695	0.50821
ilvB	13
ilvB	14
ilvB	15	-1.29852	25.784	-0.0503613	0.960057
ilvB	16	28.4887	34.3446	0.829495	0.410545
ilvB	17	21.1879	37.5534	0.564208	0.575186
ilvB	18
ilvB	19	17.7355	40.1595	0.441628	0.660874
ilvB	20	16.2887	37.3514	0.436093	0.664902
ilvB	21	17.5709	40.3141	0.435849	0.665127
ilvB	22	22.0876	39.2579	0.56263	0.57648
ilvB	23	21.1574	34.2854	0.617098	0.540148
ilvB	24
ilvB	25
ilvB	26	32.7651	25.3304	1.29351	0.202435
ilvB	27
ilvB	28	16.8998	39.8644	0.423933	0.67359
ilvB	29	55.9312	29.9661	1.86648	0.0686468
ilvB	30
ilvB	31	24.8402	37.3349	0.665337	0.508955
ilvB	32
ilvB	33	20.6969	33.319	0.621173	0.537252
ilvB	34
ilvB	35
ilvB	36	27.2043	33.88	0.80296	0.426414
ilvB	37	27.505	34.0784	0.807109	0.423352
ilvB	38
ilvB	39
ilvB	40	27.2824	33.8066	0.807013	0.423335
ilvB	41
ilvB	42	23.1853	34.3558	0.674859	0.503218
ilvB	43	23.7212	39.0579	0.607334	0.546492
ilvB	44	-20.3114	38.4302	-0.528527	0.599675
ilvB	45
ilvB	46	28.1431	35.5089	0.792567	0.432099
ilvB	47	35.9936	29.9327	1.20248	0.236246
ilvB	48	18.0547	38.6538	0.467087	0.642911
ilvB	49	18.1398	36.5239	0.496656	0.621849
ilvB	50
ilvB	51
ilvB	52	17.3249	33.2929	0.520379	0.605532
ilvB	53	25.3361	36.7773	0.688906	0.493677
ilvB	54	15.3468	39.8171	0.385431	0.701586
ilvB	55	49.4312	29.9319	1.65146	0.105931
ilvB	56
ilvB	57	19.2805	34.294	0.562213	0.577189
ilvB	58
ilvB	59	23.1663	39.4769	0.586831	0.560386
ilvB	60	17.2135	37.4187	0.460023	0.647765
ilvB	61
ilvB	62	21.1309	39.4145	0.536119	0.59446
ilvB	63
ilvB	64	16.291	39.3968	0.41351	0.681075
ilvB	65	26.1498	37.0396	0.705997	0.483998
ilvB	66	21.6277	34.6999	0.623278	0.536319
ilvB	67	21.9741	33.7639	0.650814	0.51827
ilvB	68
ilvB	69	27.0236	36.0411	0.749799	0.45689
ilvB	70	20.4698	38.0966	0.537313	0.593641
ilvB	71	-17.6095	44.4594	-0.396081	0.69452
ilvB	72	21.4006	37.1388	0.576231	0.567096
ilvB	73
ilvB	74	22.5691	25.4232	0.887737	0.379621
ilvB	75
ilvB	76
ilvB	77
ilvB	78	16.8551	39.205	0.429921	0.669218
ilvB	79
ilvB	80	5.01268	25.3872	0.197449	0.844365
ilvB	81	-9.69715	45.3641	-0.213763	0.832088
ilvB	82
ilvB	83	25.6602	37.6689	0.681202	0.499086
ilvB	84
ilvB	85	22.3562	35.724	0.625803	0.53429
ilvB	86	22.2927	39.7501	0.560821	0.577765
ilvB	87
ilvB	88	25.6744	37.0872	0.692273	0.492034
ilvB	89	47.0891	29.125	1.61679	0.113784
ilvB	90
ilvB	91	17.0001	39.0351	0.435509	0.665275
ilvB	92	-34.8497	43.2545	-0.805689	0.425308
ilvB	93	27.2969	34.2078	0.797973	0.428515
ilvB	94	19.2945	33.8008	0.570829	0.57102
ilvB	95	19.3532	36.1042	0.536038	0.594632
ilvB	96
ilvB	97
ilvB	98
ilvB	99
ilvB	100
lysA	1
lysA	2	48.3646	40.3784	1.19778	0.237562
lysA	3	18.4468	26.7696	0.689096	0.493948
lysA	4	-13.3828	32.2655	-0.414772	0.680237
lysA	5	-10.1012	41.2134	-0.245096	0.807522
lysA	6
lysA	7	56.684	25.3992	2.23173	0.0308968
lysA	8	61.699	25.3208	2.43669	0.0189369
lysA	9	31.7967	25.4725	1.24828	0.218385
lysA	10	48.1765	33.256	1.44866	0.154687
lysA	11	16.7657	24.6145	0.681132	0.498753
lysA	12
lysA	13	42.9861	26.2645	1.63667	0.109173
lysA	14
lysA	15	49.1702	35.3139	1.39238	0.170651
lysA	16	13.2407	24.6048	0.538135	0.592737
lysA	17	18.6168	26.7791	0.695199	0.490215
lysA	18
lysA	19	41.5864	39.7661	1.04577	0.301251
lysA	20	47.5832	25.7884	1.84514	0.0717545
lysA	21	47.4034	39.7511	1.19251	0.239602
lysA	22
lysA	23
lysA	24	-27.0766	32.8976	-0.823057	0.414546
lysA	25
lysA	26	45.8085	35.4317	1.29287	0.202656
lysA	27
lysA	28	46.6901	39.3445	1.1867	0.241439
lysA	29	40.9134	43.0931	0.949419	0.347593
lysA	30	47.0587	38.9691	1.20759	0.233513
lysA	31	43.3835	26.0611	1.66468	0.102359
lysA	32	20.7115	24.7076	0.838267	0.405576
lysA	33	-28.1651	33.2115	-0.848052	0.400372
lysA	34
lysA	35	47.4041	42.0168	1.12822	0.267363
lysA	36
lysA	37	12.2363	24.4271	0.500933	0.618573
lysA	38	51.3207	36.2713	1.41491	0.165237
lysA	39	27.4155	39.8543	0.687893	0.49549
lysA	40
lysA	41
lysA	42
lysA	43	47.5409	38.6025	1.23155	0.224117
lysA	44
lysA	45	27.3005	27.5429	0.9912	0.326664
lysA	46
lysA	47	45.5485	41.947	1.08586	0.284042
lysA	48
lysA	49
lysA	50	5.61222	38.7572	0.144805	0.885526
lysA	51	-29.1608	35.7195	-0.816382	0.418583
lysA	52
lysA	53	-16.1342	36.8682	-0.437619	0.663316
lysA	54	5.89169	28.4714	0.206933	0.836919
lysA	55	43.3512	42.6435	1.0166	0.315031
lysA	56
lysA	57
lysA	58	51.7093	39.1501	1.3208	0.194267
lysA	59	36.682	27.7926	1.31985	0.193869
lysA	60
lysA	61	47.7549	38.0773	1.25416	0.218097
lysA	62	44.9709	38.9775	1.15376	0.254556
lysA	63	49.5895	35.1733	1.40986	0.165773
lysA	64
lysA	65	50.0237	36.4642	1.37186	0.177223
lysA	66	42.3606	34.2627	1.23635	0.222888
lysA	67	19.4258	24.0655	0.807206	0.42353
lysA	68	17.4977	27.2894	0.641192	0.525149
lysA	69	-14.5432	36.1848	-0.401914	0.68946
lysA	70	17.9036	27.1871	0.658532	0.513479
lysA	71	46.3188	43.8481	1.05635	0.298259
lysA	72	21.8368	26.434	0.826088	0.412758
lysA	73
lysA	74
lysA	75
lysA	76
lysA	77	10.2803	29.5863	0.347469	0.729934
lysA	78	7.42913	28.0496	0.264857	0.792278
lysA	79
lysA	80
lysA	81	44.8823	44.6978	1.00413	0.322849
lysA	82	-23.9362	31.4154	-0.761927	0.449683
lysA	83	23.2831	26.8363	0.867598	0.390023
lysA	84	14.8419	27.9225	0.531539	0.597447
lysA	85	52.0978	35.0987	1.48432	0.144001
lysA	86
lysA	87	46.2887	40.7478	1.13598	0.26347
lysA	88	49.4846	36.5915	1.35235	0.182471
lysA	89
lysA	90	48.614	40.5788	1.19801	0.237048
lysA	91	46.8038	38.49	1.216	0.230325
lysA	92	46.2471	42.9797	1.07602	0.288529
lysA	93	12.0253	24.5124	0.49058	0.625788
lysA	94	-1.36253	33.9252	-0.0401629	0.968145
lysA	95	49.1711	35.4553	1.38685	0.172475
lysA	96	49.3657	34.7748	1.41958	0.162776
lysA	97	51.8533	32.7795	1.58188	0.120529
lysA	98	17.6621	24.4076	0.72363	0.472665
lysA	99	45.3992	40.1153	1.13172	0.264025
lysA	100	47.3079	39.6166	1.19414	0.238967
mfd	1	2.85247	26.3088	0.108423	0.914189
mfd	2	17.4516	40.9601	0.426063	0.672187
mfd	3	14.5599	26.8175	0.542926	0.589593
mfd	4	2.54131	23.1018	0.110005	0.912884
mfd	5	33.7621	23.8206	1.41735	0.163423
mfd	6	14.6111	19.7077	0.741389	0.461996
mfd	7	8.00351	26.8021	0.298615	0.766672
mfd	8	11.3014	26.9213	0.419795	0.676678
mfd	9	2.83358	21.3901	0.132472	0.895202
mfd	10	7.2496	20.0957	0.360754	0.720049
mfd	11	2.37307	24.7198	0.0959987	0.923884
mfd	12	0.417908	21.4183	0.0195117	0.984519
mfd	13	10.4109	22.3285	0.46626	0.643438
mfd	14	-17.26	35.2008	-0.490329	0.626232
mfd	15	-0.467133	25.7847	-0.0181167	0.985626
mfd	16	11.9726	20.2707	0.590633	0.557276
mfd	17	24.375	26.6846	0.91345	0.365479
mfd	18	10.296	25.3968	0.405405	0.687059
mfd	19	15.3494	28.6819	0.535162	0.595173
mfd	20	3.38859	22.1024	0.153313	0.878852
mfd	21	9.62197	28.8623	0.333375	0.740471
mfd	22	24.8551	22.9593	1.08258	0.284763
mfd	23	1.52713	20.3009	0.0752248	0.940355
mfd	24	-17.7535	33.0297	-0.537502	0.593404
mfd	25	-19.6247	37.9081	-0.517692	0.608234
mfd	26	7.29868	18.6289	0.391793	0.69706
mfd	27	-21.2069	39.0132	-0.543582	0.590383
mfd	28	16.8998	39.8644	0.423933	0.67359
mfd	29	21.9558	25.4973	0.861103	0.393849
mfd	30	-2.23228	39.594	-0.0563793	0.955289
mfd	31	23.1744	21.8495	1.06064	0.294055
mfd	32	13.0771	24.804	0.527217	0.600202
mfd	33	10.6683	17.1618	0.621628	0.536955
mfd	34
mfd	35
mfd	36	3.66807	20.1627	0.181924	0.856498
mfd	37	4.85439	24.4776	0.198319	0.843584
mfd	38	-18.3952	37.0947	-0.4959	0.622821
mfd	39	33.3516	39.741	0.839226	0.406331
mfd	40	4.63393	24.2758	0.190887	0.849358
mfd	41
mfd	42	12.3076	20.3008	0.606263	0.547386
mfd	43	21.4425	27.8398	0.770211	0.444949
mfd	44
mfd	45	4.1379	38.9397	0.106264	0.915825
mfd	46	17.9637	20.9273	0.858386	0.39513
mfd	47	18.8382	30.3229	0.621251	0.537959
mfd	48	18.0547	38.6538	0.467087	0.642911
mfd	49	10.8817	21.5591	0.504736	0.616207
mfd	50	34.738	38.4111	0.904374	0.370723
mfd	51	18.0201	21.0712	0.855199	0.396972
mfd	52	11.3552	23.8326	0.476457	0.636218
mfd	53	31.0992	26.0175	1.19532	0.236912
mfd	54	23.5641	23.2556	1.01326	0.315912
mfd	55	27.6021	25.1508	1.09746	0.278548
mfd	56	-17.0027	34.9436	-0.486576	0.62892
mfd	57	-0.621756	24.6576	-0.0252156	0.980012
mfd	58
mfd	59	23.4262	28.124	0.832961	0.409469
mfd	60	10.7058	22.0946	0.484543	0.630404
mfd	61	-22.1063	38.7437	-0.570578	0.571931
mfd	62	22.312	28.0673	0.794947	0.430727
mfd	63	-19.9284	35.8485	-0.555906	0.581156
mfd	64	25.572	22.9713	1.11321	0.27116
mfd	65	3.40521	26.6418	0.127815	0.898891
mfd	66	1.83562	24.9215	0.0736561	0.941618
mfd	67	2.22174	24.2262	0.0917082	0.927312
mfd	68	-19.7553	38.177	-0.517466	0.607753
mfd	69	27.0236	36.0411	0.749799	0.45689
mfd	70	24.6764	27.0715	0.911526	0.36677
mfd	71
mfd	72	13.9011	19.1148	0.727244	0.470537
mfd	73	36.7883	39.7099	0.926426	0.35906
mfd	74	12.7853	21.1053	0.605786	0.547841
mfd	75	5.37514	24.6688	0.217892	0.828621
mfd	76
mfd	77
mfd	78	9.76898	28.0344	0.348465	0.729047
mfd	79	-14.6054	32.3839	-0.451009	0.654149
mfd	80	19.6074	18.1382	1.081	0.285455
mfd	81
mfd	82	-2.16158	22.5629	-0.0958027	0.92406
mfd	83	32.7128	26.6262	1.22859	0.225341
mfd	84	22.8877	39.0674	0.585852	0.560664
mfd	85	12.0927	21.0549	0.574343	0.568311
mfd	86	20.6103	23.3554	0.882464	0.382322
mfd	87
mfd	88	2.97274	26.6167	0.111687	0.911528
mfd	89	14.8448	41.9263	0.354069	0.725147
mfd	90
mfd	91	9.91967	27.9266	0.355205	0.724095
mfd	92	35.1144	43.249	0.811911	0.421771
mfd	93	10.7367	20.2015	0.53148	0.597349
mfd	94	15.1985	17.4081	0.873071	0.387365
mfd	95	11.4041	21.3243	0.534795	0.595484
mfd	96	18.3955	25.2788	0.727703	0.47065
mfd	97	16.8544	19.7043	0.855369	0.39678
mfd	98	-6.94098	24.5154	-0.283127	0.778249
mfd	99	16.0805	40.6344	0.395736	0.694257
mfd	100
opp-3A	1
opp-3A	2	17.4516	40.9601	0.426063	0.672187
opp-3A	3
opp-3A	4
opp-3A	5
opp-3A	6	37.3234	33.2067	1.12397	0.266503
opp-3A	7
opp-3A	8	-2.92743	37.7198	-0.0776099	0.93849
opp-3A	9	21.1144	36.1045	0.584813	0.561595
opp-3A	10	23.7576	33.8646	0.701547	0.486742
opp-3A	11	7.59417	20.3519	0.373143	0.71053
opp-3A	12
opp-3A	13
opp-3A	14
opp-3A	15	8.87839	25.7508	0.344782	0.731865
opp-3A	16	23.0662	34.4213	0.670115	0.505694
opp-3A	17	26.5871	37.4832	0.709307	0.481495
opp-3A	18	15.9283	25.3335	0.628744	0.532626
opp-3A	19	15.7226	28.6774	0.548259	0.586224
opp-3A	20	28.009	26.4324	1.05965	0.295088
opp-3A	21
opp-3A	22	6.89572	28.146	0.244998	0.807572
opp-3A	23
opp-3A	24	21.8587	23.4572	0.931853	0.356076
opp-3A	25
opp-3A	26
opp-3A	27
opp-3A	28
opp-3A	29
opp-3A	30	21.6556	39.4636	0.548749	0.58589
opp-3A	31	13.701	37.452	0.36583	0.716067
opp-3A	32	-20.3797	34.7367	-0.586693	0.559855
opp-3A	33	9.47063	23.8429	0.397209	0.692871
opp-3A	34
opp-3A	35
opp-3A	36
opp-3A	37	-3.88235	24.481	-0.158586	0.874621
opp-3A	38
opp-3A	39	3.31042	28.6948	0.115367	0.908732
opp-3A	40	-28.1394	33.7931	-0.832698	0.408823
opp-3A	41
opp-3A	42	28.5938	34.2651	0.834486	0.408416
opp-3A	43	18.2887	39.1187	0.467518	0.642245
opp-3A	44	0.724361	27.5511	0.0262916	0.979139
opp-3A	45
opp-3A	46	-9.37532	35.7238	-0.262439	0.794154
opp-3A	47	21.0899	42.43	0.497053	0.621873
opp-3A	48	-28.6029	27.3751	-1.04485	0.302213
opp-3A	49	-13.4427	36.569	-0.367598	0.714896
opp-3A	50	-23.8849	38.5988	-0.618798	0.53924
opp-3A	51
opp-3A	52	-10.0525	33.364	-0.301298	0.764674
opp-3A	53
opp-3A	54	20.746	39.7672	0.521686	0.604239
opp-3A	55	-32.6812	42.8641	-0.762437	0.449961
opp-3A	56	-20.0561	34.9076	-0.574549	0.568457
opp-3A	57	-5.04221	24.6446	-0.204597	0.838951
opp-3A	58
opp-3A	59	24.1128	23.1311	1.04244	0.303034
opp-3A	60
opp-3A	61
opp-3A	62	-26.9423	39.3374	-0.684904	0.496841
opp-3A	63
opp-3A	64
opp-3A	65	-26.0088	37.0419	-0.702145	0.486372
opp-3A	66
opp-3A	67	-9.56735	33.8845	-0.282352	0.778887
opp-3A	68
opp-3A	69	-10.4336	36.2131	-0.288116	0.774449
opp-3A	70	1.1874	38.2156	0.0310712	0.975347
opp-3A	71
opp-3A	72	20.857	37.1451	0.5615	0.577016
opp-3A	73	8.13951	28.6211	0.284388	0.777389
opp-3A	74	-12.422	35.817	-0.346818	0.73042
opp-3A	75	27.8302	34.1974	0.813809	0.420572
opp-3A	76
opp-3A	77
opp-3A	78
opp-3A	79	-6.54101	32.4423	-0.201619	0.841123
opp-3A	80	26.6952	35.3023	0.756189	0.453477
opp-3A	81
opp-3A	82
opp-3A	83	1.36332	27.0496	0.0504006	0.960017
opp-3A	84	17.9489	27.8852	0.643671	0.52279
opp-3A	85
opp-3A	86
opp-3A	87
opp-3A	88	19.6965	26.4709	0.744081	0.460381
opp-3A	89	-9.6532	29.6559	-0.325507	0.746453
opp-3A	90
opp-3A	91	-2.29102	39.1158	-0.0585703	0.953554
opp-3A	92
opp-3A	93	21.8726	34.2826	0.638008	0.526269
opp-3A	94	25.2244	23.9603	1.05276	0.2982
opp-3A	95	35.7172	35.8194	0.997147	0.324146
opp-3A	96
opp-3A	97	27.469	33.4147	0.822062	0.415282
opp-3A	98	-21.796	34.2174	-0.636986	0.52704
opp-3A	99	16.5382	29.0085	0.570116	0.571566
opp-3A	100	-0.0995835	40.2681	-0.00247301	0.998038
purF	1	0.12339	26.3126	0.00468938	0.996281
purF	2	-5.02182	41.0393	-0.122366	0.903179
purF	3	-12.4778	37.6212	-0.33167	0.741525
purF	4	-7.05058	23.0815	-0.305465	0.76139
purF	5
purF	6	-8.33765	23.9934	-0.347498	0.729705
purF	7	-21.3833	37.3675	-0.572244	0.570137
purF	8	-23.2929	37.5586	-0.620174	0.538342
purF	9	-14.9209	25.8141	-0.578015	0.566135
purF	10	-7.4625	20.0938	-0.371382	0.712177
purF	11	-11.5144	24.6713	-0.466711	0.64262
purF	12	-24.4311	25.682	-0.951294	0.346537
purF	13	-7.64827	27.0633	-0.282606	0.778867
purF	14	-17.26	35.2008	-0.490329	0.626232
purF	15	-14.4988	21.1811	-0.684516	0.49716
purF	16	-19.7048	24.523	-0.803522	0.425262
purF	17	-23.1432	37.5298	-0.616661	0.540313
purF	18	-16.401	25.327	-0.647572	0.520481
purF	19	-21.7927	40.1151	-0.543255	0.589636
purF	20	-23.377	37.2658	-0.627305	0.533701
purF	21	-16.037	40.329	-0.397653	0.692853
purF	22	-16.635	39.3176	-0.423094	0.674242
purF	23	-18.4544	34.3186	-0.537737	0.593296
purF	24	-14.6177	23.5742	-0.620072	0.538143
purF	25	-19.6247	37.9081	-0.517692	0.608234
purF	26	9.45854	25.7585	0.367201	0.71519
purF	27	-21.2069	39.0132	-0.543582	0.590383
purF	28	-27.4868	39.736	-0.691735	0.492581
purF	29	46.3212	30.3364	1.52692	0.133939
purF	30
purF	31
purF	32	-5.94881	24.8546	-0.239344	0.811745
purF	33	-18.8527	33.3405	-0.565461	0.574239
purF	34
purF	35
purF	36	-18.4397	34.017	-0.542074	0.590566
purF	37	-17.9829	34.2028	-0.525774	0.601324
purF	38	-18.3952	37.0947	-0.4959	0.622821
purF	39
purF	40	-18.1894	33.924	-0.53618	0.594121
purF	41
purF	42	-19.2602	24.5181	-0.78555	0.436248
purF	43	-0.983661	39.2074	-0.0250887	0.980088
purF	44	-11.5661	27.4985	-0.420611	0.675998
purF	45	-3.20177	38.9416	-0.0822199	0.934821
purF	46	-8.77244	25.52	-0.343748	0.732602
purF	47	54.5639	41.6772	1.3092	0.197937
purF	48
purF	49	-18.47	26.038	-0.70935	0.481767
purF	50	-12.1584	38.7231	-0.313983	0.755018
purF	51	-11.2151	25.6707	-0.436882	0.664286
purF	52	-4.49305	19.7361	-0.227657	0.821018
purF	53
purF	54
purF	55	32.6491	30.4623	1.07179	0.289795
purF	56	-17.0027	34.9436	-0.486576	0.62892
purF	57	-11.9081	24.5839	-0.484385	0.630822
purF	58	-8.70776	39.9918	-0.217739	0.828768
purF	59
purF	60	-22.4522	37.3556	-0.601041	0.550897
purF	61	-22.1063	38.7437	-0.570578	0.571931
purF	62
purF	63	-17.2824	25.5984	-0.675137	0.503203
purF	64	-2.4687	39.4653	-0.0625536	0.950382
purF	65	-16.4255	26.5288	-0.619158	0.539079
purF	66	-13.728	24.837	-0.552723	0.58325
purF	67	-17.6213	33.8171	-0.521076	0.60471
purF	68	-19.7553	38.177	-0.517466	0.607753
purF	69	-11.6183	36.2059	-0.320895	0.749627
purF	70	-1.45862	38.2154	-0.0381685	0.969718
purF	71	-16.4285	31.8456	-0.515881	0.609276
purF	72	-24.1217	37.1048	-0.650097	0.518666
purF	73
purF	74	-2.38592	21.1921	-0.112586	0.910883
purF	75	-7.05571	24.6582	-0.28614	0.776248
purF	76
purF	77
purF	78	-5.06383	39.2751	-0.128932	0.897961
purF	79	-11.415	23.1417	-0.493264	0.624224
purF	80	-18.2939	25.2514	-0.724472	0.472526
purF	81	-9.69715	45.3641	-0.213763	0.832088
purF	82	-17.3353	22.4314	-0.772815	0.44327
purF	83
purF	84	-12.8808	39.1608	-0.328921	0.743617
purF	85	-17.208	35.781	-0.480926	0.632667
purF	86
purF	87
purF	88	-19.8478	37.1601	-0.534118	0.595675
purF	89	77.0364	40.1865	1.91697	0.0624043
purF	90
purF	91	-16.5752	39.0391	-0.42458	0.673166
purF	92	-25.1383	30.9714	-0.81166	0.421913
purF	93	-18.1749	34.3242	-0.529506	0.598708
purF	94	-23.2693	24.0053	-0.969343	0.337673
purF	95	-20.3125	36.0922	-0.562794	0.576432
purF	96	-20.1178	35.4327	-0.567775	0.573074
purF	97	-20.3784	23.8697	-0.853736	0.397675
purF	98	-19.3061	34.2473	-0.563727	0.57546
purF	99
purF	100	-26.9743	40.0575	-0.673391	0.504302
ribA	1	56.7457	24.7753	2.29042	0.0272121
ribA	2	51.067	28.3081	1.80397	0.0782438
ribA	3	44.7945	26.1398	1.71365	0.0927868
ribA	4	87.6325	29.6312	2.95744	0.00488384
ribA	5	62.9696	27.9221	2.25519	0.0291469
ribA	6	86.244	31.2941	2.75592	0.00819585
ribA	7	83.7255	35.2695	2.37388	0.0221387
ribA	8	65.0237	25.131	2.58739	0.0130514
ribA	9	44.3379	25.0525	1.7698	0.0835363
ribA	10	55.0128	22.8708	2.40537	0.0205306
ribA	11	55.6987	23.5083	2.36932	0.0214957
ribA	12	41.9759	25.1729	1.6675	0.10236
ribA	13	48.3343	26.0422	1.856	0.0704785
ribA	14	87.6998	32.8386	2.67063	0.0104309
ribA	15	84.7268	33.7828	2.50799	0.0158164
ribA	16	56.4326	23.4226	2.40932	0.0194885
ribA	17	57.6654	25.619	2.25089	0.028913
ribA	18	85.8732	33.2679	2.58126	0.0130973
ribA	19	45.7132	27.9544	1.63528	0.108967
ribA	20	50.3602	25.6683	1.96196	0.056112
ribA	21	43.0945	28.1424	1.5313	0.13302
ribA	22	50.162	27.154	1.84732	0.0712818
ribA	23	45.0114	23.7066	1.89868	0.0637553
ribA	24	87.117	30.6498	2.84233	0.00655729
ribA	25	86.2627	34.8786	2.47322	0.018887
ribA	26	39.8066	25.1053	1.58559	0.119836
ribA	27	84.5889	36.3157	2.32926	0.0261138
ribA	28	82.2305	38.0576	2.16069	0.0359624
ribA	29	51.5325	30.1448	1.7095	0.0944034
ribA	30	41.0846	27.6371	1.48657	0.144101
ribA	31	45.1411	26.0001	1.73619	0.0888152
ribA	32	88.4059	32.7046	2.70316	0.00916327
ribA	33	44.4316	23.055	1.92719	0.0595348
ribA	34	83.5039	39.1453	2.13318	0.0402107
ribA	35	83.2277	40.2939	2.06552	0.0468007
ribA	36	45.2323	23.42	1.93135	0.0600481
ribA	37	86.7665	32.0711	2.70544	0.00925155
ribA	38	87.013	34.4336	2.52698	0.0157876
ribA	39	82.3858	37.914	2.17297	0.0357638
ribA	40	86.5228	31.8314	2.71816	0.0088984
ribA	41	86.9603	37.8378	2.29824	0.0271428
ribA	42	59.8712	23.0157	2.60132	0.0125242
ribA	43	51.7255	26.998	1.9159	0.0613439
ribA	44	84.9304	36.456	2.32967	0.0242678
ribA	45	45.0165	27.0435	1.6646	0.102647
ribA	46	87.5236	33.3402	2.62517	0.0117179
ribA	47	52.4222	29.3198	1.78795	0.0813621
ribA	48	83.5474	36.4941	2.28934	0.0272802
ribA	49	83.5001	34.4437	2.42425	0.0194204
ribA	50	83.6683	36.657	2.28246	0.0273514
ribA	51	60.4078	24.0974	2.50682	0.0158624
ribA	52	87.0343	30.5811	2.84601	0.00681825
ribA	53	84.4819	35.194	2.40047	0.0196617
ribA	54	51.705	27.5095	1.87953	0.0661251
ribA	55	57.4162	29.5986	1.93983	0.0589774
ribA	56	88.0046	32.4865	2.70896	0.00951265
ribA	57	84.8494	31.6388	2.68182	0.01068
ribA	58	87.3793	37.4902	2.33072	0.0250315
ribA	59	53.85	27.1345	1.98456	0.0535981
ribA	60	82.6047	35.381	2.33472	0.0241852
ribA	61	83.5216	36.273	2.30258	0.0273659
ribA	62	52.6477	27.1724	1.93754	0.0588328
ribA	63	85.1804	33.5502	2.5389	0.0148207
ribA	64	54.1743	27.0906	1.99974	0.0512045
ribA	65	85.6146	34.8908	2.45379	0.0182631
ribA	66	87.0189	32.2895	2.69496	0.00993151
ribA	67	87.2492	31.4876	2.7709	0.00792884
ribA	68	85.5871	35.7724	2.39254	0.0216466
ribA	69	86.3071	34.1261	2.52906	0.0146372
ribA	70	58.0519	25.9392	2.238	0.0301047
ribA	71	82.1131	42.2782	1.94221	0.0604332
ribA	72	51.8183	25.5674	2.02673	0.0481494
ribA	73	83.421	38.1446	2.18697	0.0338672
ribA	74	84.6146	33.4656	2.52841	0.0152104
ribA	75	59.331	22.8313	2.59867	0.0130411
ribA	76	83.1963	40.963	2.03101	0.0492927
ribA	77	85.0687	39.3373	2.16255	0.0361827
ribA	78	43.1149	27.357	1.57601	0.121732
ribA	79	90.4018	29.527	3.06167	0.00370645
ribA	80	57.9305	23.885	2.4254	0.0193664
ribA	81	80.7369	43.0945	1.87348	0.0701595
ribA	82	51.2804	21.3678	2.39989	0.0201658
ribA	83	85.0149	35.7656	2.377	0.0215771
ribA	84	53.8905	26.9238	2.00159	0.0508817
ribA	85	59.8166	24.1744	2.47438	0.0167841
ribA	86	42.6815	27.7914	1.53578	0.131753
ribA	87	82.0293	39.1534	2.09508	0.0432623
ribA	88	84.9807	35.2353	2.4118	0.0196653
ribA	89	80.3747	40.0227	2.00823	0.051405
ribA	90	84.1545	39.2945	2.14163	0.0375521
ribA	91	43.326	27.2097	1.5923	0.118318
ribA	92	73.9835	28.8978	2.56018	0.0144494
ribA	93	55.2474	23.344	2.36666	0.0217082
ribA	94	53.4343	22.8838	2.33503	0.0241672
ribA	95	60.5432	24.2408	2.49757	0.0163175
ribA	96	72.1178	22.9892	3.13702	0.00304137
ribA	97	58.6799	22.4485	2.61398	0.0120561
ribA	98	46.501	23.6373	1.96727	0.0547127
ribA	99	49.664	28.1157	1.76642	0.0844243
ribA	100	82.8989	38.2322	2.1683	0.0357144
SAUSA300_1930	1
SAUSA300_1930	2
SAUSA300_1930	3	-8.76903	22.1491	-0.395909	0.693857
SAUSA300_1930	4	5.71153	18.84	0.30316	0.763106
SAUSA300_1930	5	-15.8691	24.2405	-0.654652	0.5161
SAUSA300_1930	6	0.909898	17.3439	0.052462	0.958374
SAUSA300_1930	7	28.8413	37.2507	0.774248	0.443021
SAUSA300_1930	8	-19.8194	21.8509	-0.907026	0.369225
SAUSA300_1930	9	-10.0751	21.3415	-0.472092	0.639143
SAUSA300_1930	10	-4.3823	24.3518	-0.179958	0.858031
SAUSA300_1930	11	-28.2271	24.416	-1.15609	0.25283
SAUSA300_1930	12	-1.53487	25.9379	-0.0591749	0.953075
SAUSA300_1930	13	-23.4882	37.6878	-0.623231	0.536502
SAUSA300_1930	14	-26.8946	35.0692	-0.7669	0.447059
SAUSA300_1930	15	-3.31026	25.78	-0.128404	0.898401
SAUSA300_1930	16	-6.81476	20.3158	-0.335442	0.738616
SAUSA300_1930	17	-10.6843	22.1478	-0.48241	0.631663
SAUSA300_1930	18	-24.6466	35.4099	-0.696039	0.489906
SAUSA300_1930	19	-8.02007	28.7481	-0.278977	0.781541
SAUSA300_1930	20	-8.08752	26.7398	-0.302453	0.763732
SAUSA300_1930	21	-9.2631	20.8798	-0.443638	0.659529
SAUSA300_1930	22	-3.57127	28.1597	-0.126822	0.899647
SAUSA300_1930	23	4.54403	20.0688	0.226423	0.821834
SAUSA300_1930	24	-8.0327	23.64	-0.339792	0.735495
SAUSA300_1930	25	33.9767	37.5897	0.903884	0.372811
SAUSA300_1930	26	-3.70413	25.7911	-0.143621	0.886441
SAUSA300_1930	27	-9.4667	39.1528	-0.241788	0.81044
SAUSA300_1930	28	-6.10127	23.5503	-0.259074	0.796734
SAUSA300_1930	29	11.0956	43.5001	0.25507	0.799857
SAUSA300_1930	30	-32.031	39.3065	-0.814903	0.41942
SAUSA300_1930	31	24.8402	37.3349	0.665337	0.508955
SAUSA300_1930	32	-11.9423	20.4306	-0.584531	0.561297
SAUSA300_1930	33	-0.952232	19.6913	-0.0483579	0.96162
SAUSA300_1930	34	8.90505	41.6546	0.213783	0.831993
SAUSA300_1930	35
SAUSA300_1930	36	27.2043	33.88	0.80296	0.426414
SAUSA300_1930	37	-6.40291	17.642	-0.362934	0.718154
SAUSA300_1930	38	-23.9791	37.0106	-0.647898	0.520946
SAUSA300_1930	39
SAUSA300_1930	40	-6.61886	17.4876	-0.378489	0.706608
SAUSA300_1930	41	-12.0135	28.8619	-0.416239	0.679576
SAUSA300_1930	42	22.4377	20.1072	1.1159	0.270388
SAUSA300_1930	43	-1.86483	28.01	-0.0665773	0.947195
SAUSA300_1930	44	-25.5894	38.3616	-0.667059	0.508067
SAUSA300_1930	45	-27.6925	22.6102	-1.22478	0.226761
SAUSA300_1930	46	31.9952	25.1135	1.27402	0.209054
SAUSA300_1930	47	15.6675	42.4886	0.368745	0.714262
SAUSA300_1930	48	18.0547	38.6538	0.467087	0.642911
SAUSA300_1930	49	-4.56419	26.1743	-0.174376	0.862352
SAUSA300_1930	50	-10.2805	38.7354	-0.265403	0.791938
SAUSA300_1930	51	30.3505	35.6975	0.850213	0.399708
SAUSA300_1930	52	17.3249	33.2929	0.520379	0.605532
SAUSA300_1930	53	-10.024	18.9154	-0.529939	0.598212
SAUSA300_1930	54	3.68559	23.4921	0.156886	0.875979
SAUSA300_1930	55	-9.31979	30.8338	-0.302259	0.763912
SAUSA300_1930	56	13.9012	34.974	0.397472	0.692899
SAUSA300_1930	57	19.2805	34.294	0.562213	0.577189
SAUSA300_1930	58	-26.2442	28.3463	-0.925843	0.360222
SAUSA300_1930	59	24.4675	28.1033	0.870624	0.388794
SAUSA300_1930	60	-7.61026	26.7978	-0.283989	0.777751
SAUSA300_1930	61	21.4386	38.7544	0.553191	0.583649
SAUSA300_1930	62	-3.73504	20.4241	-0.182874	0.855701
SAUSA300_1930	63
SAUSA300_1930	64	-15.8119	23.1538	-0.682908	0.497948
SAUSA300_1930	65	26.1498	37.0396	0.705997	0.483998
SAUSA300_1930	66	14.0878	20.475	0.688048	0.495034
SAUSA300_1930	67	-7.61026	17.466	-0.435719	0.664994
SAUSA300_1930	68	-28.0824	27.0618	-1.03772	0.305793
SAUSA300_1930	69	-5.23384	18.6646	-0.280415	0.780316
SAUSA300_1930	70	-3.78484	27.3092	-0.138592	0.890378
SAUSA300_1930	71
SAUSA300_1930	72	-6.29781	26.6022	-0.23674	0.813845
SAUSA300_1930	73	-27.0988	39.879	-0.679526	0.50021
SAUSA300_1930	74	19.1911	35.7475	0.536851	0.594137
SAUSA300_1930	75	-12.3771	34.4238	-0.359551	0.721074
SAUSA300_1930	76
SAUSA300_1930	77	-16.4716	29.5212	-0.55796	0.579765
SAUSA300_1930	78	-11.3836	20.2171	-0.56307	0.576064
SAUSA300_1930	79	-20.1681	32.3174	-0.624061	0.535738
SAUSA300_1930	80	1.69534	25.397	0.0667538	0.947073
SAUSA300_1930	81
SAUSA300_1930	82	-21.0845	18.3708	-1.14772	0.256548
SAUSA300_1930	83	-6.74966	19.5231	-0.345726	0.731091
SAUSA300_1930	84	-0.22895	28.0028	-0.00817597	0.99351
SAUSA300_1930	85	-0.205448	25.6118	-0.00802161	0.993632
SAUSA300_1930	86	-3.37568	28.522	-0.118353	0.906326
SAUSA300_1930	87	-16.7897	29.5974	-0.567271	0.574051
SAUSA300_1930	88	25.6744	37.0872	0.692273	0.492034
SAUSA300_1930	89	-8.01414	30.0349	-0.266827	0.790973
SAUSA300_1930	90	-13.957	29.3808	-0.47504	0.637007
SAUSA300_1930	91	-7.73028	27.942	-0.276655	0.783312
SAUSA300_1930	92
SAUSA300_1930	93	-2.31394	20.2537	-0.114248	0.909482
SAUSA300_1930	94	-3.39647	24.2548	-0.140033	0.889273
SAUSA300_1930	95	1.54222	25.9011	0.0595425	0.95279
SAUSA300_1930	96	-7.70592	20.9718	-0.367442	0.715051
SAUSA300_1930	97	-26.2852	33.4354	-0.786149	0.435812
SAUSA300_1930	98	-2.73954	34.3538	-0.079745	0.936758
SAUSA300_1930	99	-29.6867	40.4558	-0.733805	0.46705
SAUSA300_1930	100	-27.778	40.0447	-0.693674	0.491617
sbnF	1	86.9027	34.1692	2.5433	0.0148492
sbnF	2	82.3613	39.0776	2.10763	0.0409307
sbnF	3	57.7419	25.6269	2.25318	0.0286658
sbnF	4	56.162	21.57	2.60371	0.0123746
sbnF	5	51.175	28.4647	1.79784	0.0790662
sbnF	6	54.7137	22.7158	2.40862	0.0198188
sbnF	7	83.7255	35.2695	2.37388	0.0221387
sbnF	8	81.764	35.6517	2.29341	0.0266588
sbnF	9	57.3406	24.4591	2.34435	0.023534
sbnF	10	52.2431	23.0214	2.26933	0.0283217
sbnF	11	84.5487	32.6319	2.59098	0.0123349
sbnF	12	54.9786	24.6101	2.23398	0.0304979
sbnF	13	58.3554	25.5487	2.28408	0.0274872
sbnF	14	87.6998	32.8386	2.67063	0.0104309
sbnF	15	53.2032	24.5347	2.16849	0.0354466
sbnF	16	59.1949	23.2936	2.54126	0.0140077
sbnF	17	54.9107	25.7422	2.1331	0.0379502
sbnF	18	85.8732	33.2679	2.58126	0.0130973
sbnF	19	48.4934	27.8501	1.74123	0.0884765
sbnF	20	50.0976	25.68	1.95084	0.0574624
sbnF	21	35.0958	23.2681	1.50832	0.138785
sbnF	22	52.9422	27.0364	1.95818	0.0564255
sbnF	23	54.9535	23.2564	2.36294	0.02232
sbnF	24	87.117	30.6498	2.84233	0.00655729
sbnF	25	86.2627	34.8786	2.47322	0.018887
sbnF	26	52.8094	24.5665	2.14965	0.0369955
sbnF	27	84.5889	36.3157	2.32926	0.0261138
sbnF	28	50.6427	27.555	1.83788	0.0725433
sbnF	29	44.7864	30.3888	1.47378	0.147659
sbnF	30	82.6153	37.6315	2.19538	0.0333351
sbnF	31	55.6055	25.583	2.17353	0.0346019
sbnF	32	88.4059	32.7046	2.70316	0.00916327
sbnF	33	54.3418	22.635	2.40079	0.0200454
sbnF	34	83.5039	39.1453	2.13318	0.0402107
sbnF	35	83.2277	40.2939	2.06552	0.0468007
sbnF	36	58.2608	22.7407	2.56196	0.0139957
sbnF	37	58.2561	23.0884	2.52318	0.0147895
sbnF	38	87.013	34.4336	2.52698	0.0157876
sbnF	39	82.3858	37.914	2.17297	0.0357638
sbnF	40	57.9969	22.9138	2.53109	0.0144345
sbnF	41	30.0189	28.5148	1.05275	0.299105
sbnF	42	57.1069	23.1713	2.46455	0.0176021
sbnF	43	54.4984	26.8841	2.02716	0.0482193
sbnF	44	84.9304	36.456	2.32967	0.0242678
sbnF	45	84.0195	36.9658	2.2729	0.0276466
sbnF	46	39.7727	20.2628	1.96285	0.0557277
sbnF	47	22.0001	24.9534	0.881648	0.383235
sbnF	48	52.0401	26.5198	1.96231	0.0565372
sbnF	49	51.9493	25.0117	2.077	0.04354
sbnF	50	83.6683	36.657	2.28246	0.0273514
sbnF	51	85.1817	33.6681	2.53004	0.0149742
sbnF	52	87.0343	30.5811	2.84601	0.00681825
sbnF	53	55.8723	25.2806	2.21008	0.03113
sbnF	54	22.6271	23.2746	0.972178	0.335737
sbnF	55	47.3056	30.0116	1.57624	0.1223
sbnF	56	88.0046	32.4865	2.70896	0.00951265
sbnF	57	45.046	19.0781	2.36113	0.023311
sbnF	58	87.3793	37.4902	2.33072	0.0250315
sbnF	59	54.1289	27.1216	1.99578	0.0523165
sbnF	60	51.0434	25.6948	1.98653	0.0532248
sbnF	61	83.5216	36.273	2.30258	0.0273659
sbnF	62	51.9259	27.2026	1.90886	0.0625308
sbnF	63	85.1804	33.5502	2.5389	0.0148207
sbnF	64	49.9479	27.2593	1.83233	0.0731104
sbnF	65	57.1818	25.1796	2.27096	0.0282145
sbnF	66	28.126	20.1434	1.39629	0.169632
sbnF	67	55.7494	22.853	2.43947	0.0184546
sbnF	68	85.5871	35.7724	2.39254	0.0216466
sbnF	69	57.7986	24.5582	2.35353	0.0225683
sbnF	70	54.2903	26.1157	2.07884	0.0432366
sbnF	71	82.1131	42.2782	1.94221	0.0604332
sbnF	72	52.0956	25.5559	2.0385	0.0469152
sbnF	73	83.421	38.1446	2.18697	0.0338672
sbnF	74	53.1099	24.3431	2.18172	0.0346428
sbnF	75	87.9376	31.5515	2.78711	0.00809571
sbnF	76	83.1963	40.963	2.03101	0.0492927
sbnF	77	85.0687	39.3373	2.16255	0.0361827
sbnF	78	50.5596	27.0844	1.86674	0.0681832
sbnF	79	90.4018	29.527	3.06167	0.00370645
sbnF	80	58.2088	23.8699	2.43858	0.0187551
sbnF	81	80.7369	43.0945	1.87348	0.0701595
sbnF	82	90.1678	28.9099	3.11893	0.00300978
sbnF	83	56.5149	25.7637	2.19359	0.0332462
sbnF	84	82.7376	37.3798	2.21343	0.031555
sbnF	85	56.0676	24.3535	2.30224	0.0255226
sbnF	86	53.1925	27.3763	1.94301	0.0584298
sbnF	87	82.0293	39.1534	2.09508	0.0432623
sbnF	88	56.4567	25.3689	2.22543	0.0306861
sbnF	89	42.8897	23.915	1.79342	0.0804688
sbnF	90	84.1545	39.2945	2.14163	0.0375521
sbnF	91	50.7843	26.9215	1.88638	0.0657067
sbnF	92	41.3291	30.5227	1.35404	0.183517
sbnF	93	58.0117	23.2147	2.49892	0.0156541
sbnF	94	53.1717	22.8977	2.32215	0.0249154
sbnF	95	53.2318	24.6277	2.16146	0.0361416
sbnF	96	84.9391	33.1769	2.56019	0.0139713
sbnF	97	87.3937	31.0952	2.81052	0.00724208
sbnF	98	85.4821	32.1588	2.65812	0.0105244
sbnF	99	80.9902	38.7895	2.08794	0.0427621
sbnF	100	82.8989	38.2322	2.1683	0.0357144
secA2	1	18.5582	36.6515	0.506342	0.615328
secA2	2	-33.508	40.7271	-0.822743	0.415194
secA2	3	4.98997	26.8872	0.185589	0.853518
secA2	4	15.4873	32.245	0.480301	0.63329
secA2	5
secA2	6
secA2	7	62.6569	36.272	1.72742	0.0912705
secA2	8
secA2	9	-23.4154	36.0729	-0.649113	0.519565
secA2	10	3.58709	34.0535	0.105337	0.916598
secA2	11	-31.8307	24.3323	-1.30817	0.196462
secA2	12	35.568	35.8928	0.990951	0.327008
secA2	13
secA2	14	-28.8023	35.0362	-0.822071	0.415277
secA2	15	7.61584	25.7597	0.295649	0.768858
secA2	16	-28.4786	34.3447	-0.8292	0.41071
secA2	17	-29.9194	37.432	-0.799302	0.427973
secA2	18	-23.2905	35.4298	-0.657371	0.514218
secA2	19	33.1771	28.3447	1.17048	0.247967
secA2	20	-7.17839	37.4164	-0.191851	0.848741
secA2	21
secA2	22
secA2	23
secA2	24	-29.286	32.8581	-0.891287	0.377221
secA2	25	48.1962	37.1008	1.29906	0.203206
secA2	26	42.1481	35.5325	1.18618	0.241776
secA2	27	-9.4667	39.1528	-0.241788	0.81044
secA2	28
secA2	29	78.0966	28.8175	2.71004	0.00955359
secA2	30	34.6961	39.2562	0.883838	0.381482
secA2	31	17.3596	37.421	0.463898	0.644775
secA2	32	-26.2714	24.6095	-1.06753	0.290481
secA2	33	-30.372	33.1733	-0.915554	0.36421
secA2	34	19.4444	41.549	0.467987	0.64278
secA2	35
secA2	36	-2.2331	34.1313	-0.0654268	0.948137
secA2	37	-23.8189	34.1328	-0.697829	0.488454
secA2	38	64.8937	35.6945	1.81803	0.0769497
secA2	39	-6.66098	40.0755	-0.166211	0.868828
secA2	40	-14.2267	24.204	-0.587781	0.559223
secA2	41	-23.0022	40.2092	-0.572064	0.570647
secA2	42
secA2	43	16.2375	39.1375	0.414883	0.680076
secA2	44	-20.3114	38.4302	-0.528527	0.599675
secA2	45
secA2	46
secA2	47	20.5993	30.2943	0.679973	0.500438
secA2	48
secA2	49
secA2	50	61.6227	37.6368	1.6373	0.108702
secA2	51	-31.3731	35.6779	-0.879344	0.383886
secA2	52	4.55468	23.8865	0.19068	0.849695
secA2	53	5.43208	26.3317	0.206294	0.837296
secA2	54	-34.5183	28.0538	-1.23043	0.22441
secA2	55	83.0968	41.2503	2.01445	0.0502438
secA2	56
secA2	57
secA2	58
secA2	59
secA2	60
secA2	61	34.2494	38.4906	0.889814	0.379641
secA2	62	-8.26474	39.5187	-0.209135	0.835266
secA2	63
secA2	64	-32.9847	39.1787	-0.841905	0.404017
secA2	65
secA2	66	-5.27036	34.8437	-0.151257	0.880464
secA2	67	39.1346	33.4388	1.17033	0.247645
secA2	68	21.7499	38.1492	0.570129	0.571861
secA2	69	-30.0046	35.9939	-0.833603	0.40847
secA2	70	-30.7015	37.9469	-0.809065	0.422643
secA2	71	-23.5597	31.7137	-0.742887	0.462652
secA2	72	38.3469	36.8596	1.04035	0.303282
secA2	73
secA2	74	24.9212	35.6652	0.698755	0.488467
secA2	75	-23.2076	34.2835	-0.676931	0.502346
secA2	76	-33.8036	42.779	-0.790192	0.43432
secA2	77	-27.6828	41.2055	-0.671821	0.505291
secA2	78
secA2	79	-18.8113	32.3356	-0.581753	0.563636
secA2	80	-20.6128	25.2117	-0.81759	0.4179
secA2	81	-2.29675	32.5953	-0.0704626	0.944264
secA2	82	-26.1439	31.3802	-0.833136	0.40873
secA2	83	12.6912	37.8091	0.335664	0.738618
secA2	84	-33.6189	38.9087	-0.864044	0.391774
secA2	85	-28.9002	25.2836	-1.14304	0.258464
secA2	86	-29.1818	39.6486	-0.736011	0.46563
secA2	87
secA2	88	-31.6099	26.2343	-1.20491	0.234026
secA2	89	77.0364	40.1865	1.91697	0.0624043
secA2	90	-32.3476	40.93	-0.790315	0.4334
secA2	91	-30.3224	38.8552	-0.780394	0.439245
secA2	92	-34.8497	43.2545	-0.805689	0.425308
secA2	93	-29.69	34.1694	-0.868905	0.388892
secA2	94
secA2	95
secA2	96	42.4869	34.9807	1.21458	0.231004
secA2	97	-15.5768	23.9481	-0.650437	0.518645
secA2	98	-30.8296	34.0782	-0.904672	0.369978
secA2	99	-29.9746	40.4509	-0.741013	0.462713
secA2	100	-26.4199	40.066	-0.659409	0.513149
tarL'	1	35.1291	25.7343	1.36507	0.179675
tarL'	2	66.883	27.5312	2.42936	0.0193773
tarL'	3	86.2514	35.6326	2.42058	0.01917
tarL'	4	35.9168	22.4898	1.59702	0.117108
tarL'	5	79.7556	39.45	2.02169	0.0493162
tarL'	6	34.5201	23.5113	1.46823	0.148431
tarL'	7	31.896	26.3852	1.20886	0.233322
tarL'	8	29.9	26.5959	1.12423	0.26701
tarL'	9	27.3763	21.0014	1.30355	0.199019
tarL'	10	12.4027	20.037	0.61899	0.539189
tarL'	11	32.8183	24.3075	1.35013	0.182712
tarL'	12	31.672	25.5056	1.24177	0.220756
tarL'	13	35.4896	26.5298	1.33773	0.188184
tarL'	14	20.3961	17.9884	1.13385	0.262732
tarL'	15	13.4526	21.1964	0.634667	0.52886
tarL'	16	5.81173	17.7665	0.327116	0.744868
tarL'	17	31.8838	26.5226	1.20214	0.235087
tarL'	18	34.1193	24.9399	1.36806	0.177939
tarL'	19	22.3437	28.5795	0.781808	0.438422
tarL'	20	36.7144	21.4042	1.71529	0.0933279
tarL'	21	82.9944	38.3695	2.16303	0.0361432
tarL'	22	81.495	37.4758	2.17461	0.0349562
tarL'	23	34.7262	24.0719	1.4426	0.155764
tarL'	24	14.6954	19.4142	0.756944	0.452783
tarL'	25	40.7476	21.5011	1.89514	0.0671382
tarL'	26	29.5028	25.4194	1.16064	0.251908
tarL'	27	32.6513	27.5462	1.18533	0.244352
tarL'	28	82.2305	38.0576	2.16069	0.0359624
tarL'	29	76.4868	41.9774	1.8221	0.0752417
tarL'	30	82.6153	37.6315	2.19538	0.0333351
tarL'	31	61.4937	25.3065	2.42996	0.0188101
tarL'	32	36.7533	24.3596	1.50878	0.137184
tarL'	33	13.478	19.6011	0.687615	0.494811
tarL'	34	52.9881	28.4902	1.85987	0.0715734
tarL'	35	45.7283	29.6845	1.54048	0.132979
tarL'	36	34.908	23.8273	1.46505	0.150183
tarL'	37	14.3826	20.0919	0.715843	0.477353
tarL'	38	15.6839	21.9116	0.715777	0.478504
tarL'	39	82.3858	37.914	2.17297	0.0357638
tarL'	40	7.35354	17.4819	0.420636	0.675754
tarL'	41	32.2922	28.4493	1.13508	0.263452
tarL'	42	36.8429	24.0669	1.53085	0.132806
tarL'	43	28.4182	27.7093	1.02558	0.31023
tarL'	44	84.9304	36.456	2.32967	0.0242678
tarL'	45	84.0195	36.9658	2.2729	0.0276466
tarL'	46	35.8056	25.0014	1.43214	0.158864
tarL'	47	81.1974	40.5783	2.00101	0.0522093
tarL'	48	83.5474	36.4941	2.28934	0.0272802
tarL'	49	12.1702	21.5438	0.564906	0.574943
tarL'	50	45.6548	26.8537	1.70013	0.0961662
tarL'	51	12.6135	21.1584	0.596149	0.554063
tarL'	52	35.273	23.2688	1.51589	0.137038
tarL'	53	84.4819	35.194	2.40047	0.0196617
tarL'	54	24.0019	28.2768	0.848822	0.400108
tarL'	55	24.1527	30.6459	0.788121	0.434949
tarL'	56	36.2898	24.4563	1.48386	0.144816
tarL'	57	33.0033	24.0848	1.3703	0.178431
tarL'	58	32.7364	28.1726	1.16199	0.2523
tarL'	59	54.8913	27.086	2.02656	0.048938
tarL'	60	30.7598	26.4184	1.16433	0.250564
tarL'	61	33.764	22.4087	1.50674	0.140851
tarL'	62	25.8004	28.0023	0.921368	0.361666
tarL'	63	33.3847	25.2251	1.32347	0.192672
tarL'	64	30.4235	27.8525	1.09231	0.280149
tarL'	65	33.8291	26.1427	1.29402	0.202566
tarL'	66	15.8294	20.4461	0.774202	0.442952
tarL'	67	35.5393	23.6791	1.50087	0.139938
tarL'	68	30.7304	22.1516	1.38728	0.173235
tarL'	69	86.3071	34.1261	2.52906	0.0146372
tarL'	70	85.8005	36.0614	2.37929	0.0215505
tarL'	71	82.1131	42.2782	1.94221	0.0604332
tarL'	72	28.87	26.296	1.09788	0.277621
tarL'	73	83.421	38.1446	2.18697	0.0338672
tarL'	74	32.8058	25.1626	1.30375	0.199255
tarL'	75	36.1802	24.0114	1.50679	0.139722
tarL'	76	23.9364	25.2681	0.947299	0.349472
tarL'	77	28.4897	29.3076	0.972092	0.336442
tarL'	78	25.5696	27.8217	0.919053	0.362761
tarL'	79	38.7404	22.474	1.72379	0.0916114
tarL'	80	15.4603	20.8449	0.741682	0.462134
tarL'	81	44.3333	31.6418	1.4011	0.170808
tarL'	82	8.35114	16.242	0.514171	0.609398
tarL'	83	85.0149	35.7656	2.377	0.0215771
tarL'	84	82.7376	37.3798	2.21343	0.031555
tarL'	85	8.43294	18.4452	0.457189	0.649516
tarL'	86	81.7282	37.9415	2.15406	0.0367527
tarL'	87	44.477	28.7904	1.54485	0.131128
tarL'	88	16.1903	21.8383	0.741371	0.462007
tarL'	89	25.5699	29.7885	0.858382	0.395796
tarL'	90	33.0501	29.0468	1.13782	0.261087
tarL'	91	82.3604	37.1405	2.21753	0.0316795
tarL'	92	81.9171	41.5936	1.96946	0.0560328
tarL'	93	14.1606	20.1609	0.702378	0.485576
tarL'	94	13.3877	19.9355	0.67155	0.505381
tarL'	95	32.9482	25.4214	1.29608	0.201706
tarL'	96	33.1472	24.9347	1.32936	0.19058
tarL'	97	18.663	19.6688	0.948862	0.347649
tarL'	98	33.7497	24.0664	1.40236	0.166986
tarL'	99	26.2483	28.8415	0.910088	0.367849
tarL'	100	28.2014	28.4802	0.990212	0.32761
thiW	1	17.0532	36.6693	0.465053	0.644354
thiW	2	31.1838	28.9721	1.07634	0.287777
thiW	3	16.6886	37.5885	0.44398	0.658973
thiW	4	17.9557	32.2172	0.557334	0.580001
thiW	5	10.0143	41.2139	0.242984	0.809147
thiW	6	16.6543	33.5478	0.496435	0.621807
thiW	7	13.9498	37.4491	0.372501	0.71135
thiW	8	12.0228	37.6789	0.319085	0.751172
thiW	9	14.3414	25.8214	0.555407	0.581367
thiW	10	13.9918	33.991	0.411632	0.682654
thiW	11	15.0601	34.5751	0.435578	0.664912
thiW	12	13.7788	36.2241	0.380378	0.705455
thiW	13	17.4341	37.766	0.461634	0.646726
thiW	14	1.07679	25.225	0.0426874	0.966136
thiW	15	15.0185	35.997	0.417215	0.678505
thiW	16	-4.10251	24.6655	-0.166326	0.868533
thiW	17	16.8473	37.5982	0.448089	0.656064
thiW	18	16.1965	35.5156	0.456037	0.650509
thiW	19	7.43462	40.2312	0.184798	0.854218
thiW	20	30.111	26.3798	1.14144	0.259861
thiW	21	13.2187	40.3528	0.327577	0.744821
thiW	22	11.7867	39.3565	0.299486	0.765948
thiW	23	16.8133	34.3365	0.489662	0.626651
thiW	24	-4.88831	23.6579	-0.206625	0.837177
thiW	25	15.9701	37.9617	0.42069	0.676793
thiW	26	11.6567	36.0419	0.323422	0.747874
thiW	27	14.3571	39.1077	0.367118	0.715875
thiW	28	12.5538	39.8993	0.314637	0.75446
thiW	29	6.74553	43.5204	0.154997	0.877533
thiW	30	12.907	39.5487	0.326356	0.745668
thiW	31	25.9888	26.5294	0.979623	0.332084
thiW	32	18.9403	34.7517	0.545018	0.587985
thiW	33	-6.01849	23.8649	-0.25219	0.801908
thiW	34	13.3295	41.6199	0.320268	0.750725
thiW	35	12.996	42.7596	0.30393	0.763089
thiW	36	16.8934	34.0356	0.496344	0.62218
thiW	37	-5.13162	24.4765	-0.209655	0.834773
thiW	38	17.0385	37.1117	0.459114	0.648768
thiW	39	12.4966	40.0406	0.312098	0.756587
thiW	40	0.0828294	24.2843	0.00341082	0.997292
thiW	41	16.9858	40.2878	0.421611	0.675685
thiW	42	18.8373	34.4149	0.547361	0.586836
thiW	43	13.4337	39.1597	0.343048	0.73306
thiW	44	15.2537	38.481	0.396394	0.693647
thiW	45	14.373	38.8879	0.3696	0.71334
thiW	46	17.8469	35.6535	0.500565	0.619064
thiW	47	11.3082	42.5232	0.26593	0.791659
thiW	48	13.6979	38.6974	0.353973	0.725173
thiW	49	13.7918	36.5661	0.377175	0.707817
thiW	50	9.99167	27.6808	0.36096	0.719856
thiW	51	-6.99577	25.7039	-0.272168	0.786738
thiW	52	17.2225	33.2941	0.517283	0.607672
thiW	53	15.0805	36.876	0.408952	0.684108
thiW	54	-11.503	28.4364	-0.404516	0.687594
thiW	55	9.16648	43.1303	0.21253	0.832698
thiW	56	18.2963	34.929	0.523812	0.60298
thiW	57	14.9187	34.3498	0.434316	0.666452
thiW	58	17.4486	39.9184	0.437105	0.664446
thiW	59	19.1921	28.1985	0.680609	0.499768
thiW	60	12.8634	37.4585	0.343405	0.732929
thiW	61	13.4013	38.8575	0.344882	0.732247
thiW	62	10.8346	39.5052	0.274258	0.785114
thiW	63	15.4047	35.9003	0.429096	0.669995
thiW	64	-5.11039	28.1869	-0.181304	0.856892
thiW	65	15.8389	37.1752	0.426062	0.672188
thiW	66	17.2776	34.7553	0.497123	0.621578
thiW	67	17.6317	33.817	0.521387	0.604495
thiW	68	15.6563	38.2257	0.409575	0.684359
thiW	69	16.7442	36.1657	0.462984	0.645385
thiW	70	16.1238	38.142	0.422731	0.674461
thiW	71	11.9387	44.5148	0.268195	0.79017
thiW	72	11.1172	37.2306	0.298603	0.766506
thiW	73	13.7443	40.0274	0.343373	0.732883
thiW	74	14.8389	35.7956	0.414545	0.680536
thiW	75	18.0484	34.3611	0.525259	0.602303
thiW	76	-3.92041	30.889	-0.126919	0.899674
thiW	77	-7.20955	29.6074	-0.243505	0.808772
thiW	78	-9.9946	28.0327	-0.356534	0.723036
thiW	79	20.6935	32.31	0.640468	0.525117
thiW	80	16.9388	35.4361	0.478011	0.634957
thiW	81	10.4443	45.3589	0.23026	0.819355
thiW	82	-1.69899	22.5637	-0.0752976	0.940278
thiW	83	15.3684	37.788	0.4067	0.686075
thiW	84	13.1479	39.159	0.335758	0.738487
thiW	85	1.09739	25.6113	0.0428479	0.965993
thiW	86	11.9869	39.851	0.300793	0.764989
thiW	87	11.9602	41.4237	0.288729	0.774445
thiW	88	-1.58868	26.6191	-0.0596818	0.952652
thiW	89	10.4855	41.9592	0.249898	0.803946
thiW	90	-2.5456	29.4504	-0.0864371	0.931494
thiW	91	12.6521	39.0717	0.323817	0.747577
thiW	92	11.9864	43.5707	0.275102	0.78469
thiW	93	-5.33005	24.558	-0.217039	0.829027
thiW	94	14.9444	33.8509	0.441479	0.661029
thiW	95	15.0032	36.1512	0.415012	0.68015
thiW	96	15.1978	35.4884	0.428248	0.67056
thiW	97	0.764097	24.0577	0.0317609	0.9748
thiW	98	15.9192	34.2821	0.464358	0.644407
thiW	99	11.2144	40.6724	0.275726	0.784079
[truncated: 1 more rows]

## Sheet: variables
variable	comment
replicate	Replicate sampling of independent genetic pairs from the phylogeny
pair_id
iso1	Reference isolate
iso2	Control isolate
dist_denovo	Genetic distance between iso1 and iso2 (number of variants based on reads mapping on the draft assembly of iso1)
PI_pair	Whether the pair is included in the convergence analysis of 28 pairs with discordant PI uptake (Supplementary File 6)
delta_auc	Mean PI uptake AUC (iso2) - mean PI uptake AUC (iso1)
pval	P value for PI uptake AUC difference (Wilcoxon rank sum test)
mrca	Most recent common ancestor (MRCA) for iso1 and iso2
n_tips	Number of terminal nodes (tips) in the clade defined by the MRCA
tip_labels	Sample_id of tips
unique_gene_symbol	Unique gene abbreviation based on the "pan gene symbol" in aureowiki (if pan gene symbol missing FPR3757 locus tag)
is_mutated	Presence/absence of mutations (nonsynonymous substitutions and truncations)
mean_delta	Mean absolute PI updake AUC difference within pairs
median_delta	Median absolute PI updake AUC difference within pairs
estimate	Regression coefficient beta
std.error	Standard error of the linear regression
statistic	The value of a T-statistic to test the hypothesis that the regression coefficient is different from zero
p.value	P value of the linear regression
